# Supplementary material for: The interactome of the copper transporter ATP7A belongs to a network of neurodevelopmental and neurodegeneration factors
Source: eLife. 2017 Mar 29;6:e24722. doi: 10.7554/eLife.24722 (PMC5400511; doi:10.7554/eLife.24722)
Supplement: Supplementary file 1. — Tabs contain table of antibodies and primers used in this study. BCS and Cu tabs include all proteome data from crosslinked ATP7A complexes isolated from BCS treated and copper treated neuroblastoma cells as indicated in Figure 1 and Material and methods. Cutoff selection criteria of hits are defined in Material and methods. DOI: http://dx.doi.org/10.7554/eLife.24722.013 [file elife-24722-supp1.xlsx]

## Sheet: Antibodies
Antibody	Catalog number	Source	Dilutions
			Blot	RRID
Monoclonal Anti ATP7A	75-142	Neuromab UC Davis	1:500	AB_10672736
Monoclonal Anti TrfR	13-6800	Zymed	1:2000	AB_2533029
Monoclonal Anti Hsp90	610418	BD Bioscience	1:1000	AB_397798
Monoclonal Anti β Actin	A5451	Sigma	1:500	AB_476692
Polyclonal Anti DBH	AB1536	Millipore	1:500	AB_11214506
Monoclonal Anti Clathrin heavy chain (23)	610499	BD Transduction Laboratories	1:1000	AB_397865
Polyclonal Anti COG5	HPA020300	Sigma	1:1000	AB_1668604
Polyclonal Anti COG7	N/A	Lupashin laboratory	1:1000
Polyclonal Anti Strumpellin C-14	sc87442	Santa Cruz	1:500	AB_2234159
Polyclonal Anti GIGYF2	A303-731A	Bethyl	1:2000	AB_11204927
Polyclonal Anti VAC14		Weissman laboratory	1:2000
Polyclonal Anti NF-kappaB1	A301-820A-T	Bethyl	1:1000	AB_1264326
Polyclonal Anti NSF	D31C7	Cell Signaling	1:500	AB_10828715
Polyclonal Anti DOCK7	1300-1	PTG	1:1000	AB_10646476
Monoclonal Anti PRDX1 (3G5)	LF-MA0214	Biovendor	1:3000	AB_1960075
Monoclonal Anti PRDX2 (1E8)	LF-MA0144	Biovendor	1:2000	AB_1959477
Monoclonal Anti PRDX4	ab16943	Abcam	1:2000	AB_443567
Monoclonal Anti PRDX6	ab16947	Abcam	1:1000	AB_443571
Polyclonal Anti Thioredoxin 1	SC20146	Santa Cruz	1:1000	AB_2256876
Monoclonal Anti UCHL1	N/A	Li Lab	1:28000
Polyclonal Anti GPP130	PRB-144C	Biolegend	1:1000	AB_291570
Polyclonal Anti SLC31a1 (CTR1)	MABS398	Millipore	1:1000	AB_2637040

## Sheet: Primers
Gene	Forward	Reverse
COG1	AAGCCAGACTCCAGAATTGAG	ACCAGTCACCAATCCAAACAG
COG8	AAATCGCTGTCTCCAAGTCC	TTGGCAGGATAAAGGCGAG
GAPDH	ACATCGCTCAGACACCATG	TGTAGTTGAGGTCAATGAAGGG
ATP7A	tcttccaggattgtctgttatgaa	accagcctccgaaaaactg
ATOX1	acagcccacaggatggac	gactgccaagtcccaggtc
CCS	tcatcgagggaactattgacg	agggttaaagtgattcccacag
COX17	AAGTGACTGCGGACGAATC	TTTGAGTCAACCAGACCCG
MT1A	tcctgcaaatgcaaagagtg	gcacacttggcacagctc
MT2A	ctagccgcctcttcagctc	gcaggtgcaggagtcacc
COX19	TGGAGAAACTGGGATTTGGAG	TGGGCCGTGTTCAGTGGTCT
CHCHD7 (COX 23)	cgtgagccattgacgtgtt	tttgcatgagttcctcgtgt
COA5 (PET191)	TTATGAGGACAAGCCGCAG	GCGTACTTCAAAGAGTTGCAG
SCO1	GGAATGAAGCACGTCAAGAAAG	TCCTTGTCAGTTTTACGCTCC

## Sheet: BCS
Description	GENE	Accession	CalcPI	#AA	MW[kDA]	Coverage	#Peptide	#UniquePeptides	Area	#PSMs	Coverage	#Peptide	#UniquePeptides	Area	#PSMs	Sum PSMs	Log2 Ratio IP/PEP PSMS
Protein transport protein Sec16A OS=Homo sapiens GN=SEC16A PE=1 SV=1	SEC16A	J3KNL6	5.8	251.738	2357	59.2703	93	4	2300000000	431	1.90921	1	1	12000000	2	433	7.75154
General vesicular transport factor p115 OS=Homo sapiens GN=USO1 PE=1 SV=2	USO1	O60763	4.91	107.828	962	48.8565	33	33	520000000	100	2.079	1	1	14000000	1	101	6.64386
5'-3' exoribonuclease 1 OS=Homo sapiens GN=XRN1 PE=1 SV=1	XRN1	Q8IZH2	7.21	193.985	1706	0.820633	1	1	3500000	1	0	0	0	0	0	1	6.62936
Nuclear cap-binding protein subunit 1 OS=Homo sapiens GN=NCBP1 PE=1 SV=1	NCBP1	Q09161	6.43	91.781	790	3.5443	2	2	21000000	2	0	0	0	0	0	2	6.62936
Coiled-coil domain-containing protein 178 OS=Homo sapiens GN=CCDC178 PE=4 SV=1	CCDC178	J3KRT5	7.12	21.276	187	3.20856	1	1	18000000	1	0	0	0	0	0	1	6.62936
Isoform 4 of Kinesin-like protein KIF1B OS=Homo sapiens GN=KIF1B	KIF1B	O60333-4	5.52	205.012	1823	0.71311	1	1	12000000	1	0	0	0	0	0	1	6.62936
Isoform 2 of Melanoma-associated antigen D1 OS=Homo sapiens GN=MAGED1	MAGED1	Q9Y5V3-2	5.82	91.901	834	3.11751	2	2	7800000	2	0	0	0	0	0	2	6.62936
Acetolactate synthase-like protein OS=Homo sapiens GN=ILVBL PE=1 SV=2	ILVBL	A1L0T0	8.15	67.825	632	1.58228	1	1		1	0	0	0	0	0	1	6.62936
Histidine triad nucleotide-binding protein 1 OS=Homo sapiens GN=HINT1 PE=1 SV=2	HINT1	P49773	6.95	13.793	126	7.14286	1	1	7700000	1	0	0	0	0	0	1	6.62936
Cleavage stimulation factor subunit 2 OS=Homo sapiens GN=CSTF2 PE=1 SV=1	CSTF2	E9PID8	8.03	46.636	438	8.90411	3	1	38000000	3	0	0	0	0	0	3	6.62936
Isoform 6 of Serine/threonine-protein kinase MRCK alpha OS=Homo sapiens GN=CDC42BPA	CDC42BPA	Q5VT25-6	6.51	202.684	1781	35.598	50	50	140000000	89	0	0	0	0	0	89	6.62936
Isoform SM-B1 of Small nuclear ribonucleoprotein-associated proteins B and B' OS=Homo sapiens GN=SNRPB	SNRPB	P14678-3	10.18	30.012	289	2.42215	1	1	28000000	1	0	0	0	0	0	1	6.62936
Kinectin OS=Homo sapiens GN=KTN1 PE=1 SV=1	KTN1	Q86UP2	5.64	156.179	1357	5.37951	6	6	12000000	6	0	0	0	0	0	6	6.62936
Neuronal migration protein doublecortin OS=Homo sapiens GN=DCX PE=1 SV=3	DCX	O43602	8.95	49.286	441	6.12245	2	2	12000000	2	0	0	0	0	0	2	6.62936
Protein transport protein Sec24A OS=Homo sapiens GN=SEC24A PE=1 SV=2	SEC24A	O95486	7.66	119.674	1093	7.95974	6	5	22000000	9	0	0	0	0	0	9	6.62936
Fragile X mental retardation protein 1 OS=Homo sapiens GN=FMR1 PE=1 SV=1	FMR1	Q06787	7.42	71.131	632	6.8038	4	3	98000000	5	0	0	0	0	0	5	6.62936
Talin-1 OS=Homo sapiens GN=TLN1 PE=1 SV=3	TLN1	Q9Y490	6.07	269.599	2541	9.75994	15	15	33000000	22	0	0	0	0	0	22	6.62936
Isoform 3 of CLIP-associating protein 2 OS=Homo sapiens GN=CLASP2	CLASP2	O75122-3	8.37	165.821	1515	1.05611	1	1	6100000	1	0	0	0	0	0	1	6.62936
Isoform 2 of N-acetyl-D-glucosamine kinase OS=Homo sapiens GN=NAGK	NAGK	Q9UJ70-2	6.68	42.011	390	1.79487	1	1		1	0	0	0	0	0	1	6.62936
Protein LSM12 homolog OS=Homo sapiens GN=LSM12 PE=1 SV=1	LSM12	K7ELG9	7.42	24.94	230	3.91304	1	1	20000000	1	0	0	0	0	0	1	6.62936
Probable ubiquitin carboxyl-terminal hydrolase FAF-X OS=Homo sapiens GN=USP9X PE=1 SV=3	USP9X	Q93008	5.8	292.094	2570	17.2763	31	31	85000000	48	0	0	0	0	0	48	6.62936
Ras GTPase-activating protein-binding protein 1 OS=Homo sapiens GN=G3BP1 PE=1 SV=1	G3BP1	Q13283	5.52	52.132	466	9.22747	3	3	31000000	4	0	0	0	0	0	4	6.62936
Golgi resident protein GCP60 OS=Homo sapiens GN=ACBD3 PE=1 SV=4	ACBD3	Q9H3P7	5.06	60.556	528	3.0303	1	1		1	0	0	0	0	0	1	6.62936
Mitotic-spindle organizing protein 2B OS=Homo sapiens GN=MZT2B PE=1 SV=1	MZT2B	Q6NZ67	10.15	16.216	158	31.0127	3	3	48000000	5	0	0	0	0	0	5	6.62936
RNA polymerase II-associated protein 3 OS=Homo sapiens GN=RPAP3 PE=1 SV=2	RPAP3	Q9H6T3	6.84	75.672	665	25.1128	13	13	110000000	22	0	0	0	0	0	22	6.62936
Isoform 4 of WD repeat-containing protein 62 OS=Homo sapiens GN=WDR62	WDR62	O43379-4	5.88	166.407	1523	1.05056	1	1	6000000	1	0	0	0	0	0	1	6.62936
Gamma-tubulin complex component 4 OS=Homo sapiens GN=TUBGCP4 PE=1 SV=1	TUBGCP4	H3BN56	6.77	9.495	82	26.8293	1	1	46000000	2	0	0	0	0	0	2	6.62936
Cytoplasmic dynein 1 intermediate chain 2 OS=Homo sapiens GN=DYNC1I2 PE=1 SV=3	DYNC1I2	Q13409	5.2	71.412	638	8.30721	3	3	9000000	4	0	0	0	0	0	4	6.62936
Isoform 5 of MMS19 nucleotide excision repair protein homolog OS=Homo sapiens GN=MMS19	MMS19	Q96T76-8	6.52	115.631	1051	11.0371	7	7	15000000	9	0	0	0	0	0	9	6.62936
Prefoldin subunit 1 OS=Homo sapiens GN=PFDN1 PE=1 SV=2	PFDN1	O60925	6.81	14.202	122	20.4918	3	3	40000000	5	0	0	0	0	0	5	6.62936
Glycogen debranching enzyme OS=Homo sapiens GN=AGL PE=1 SV=3	AGL	P35573	6.76	174.652	1532	19.6475	23	23	110000000	35	0	0	0	0	0	35	6.62936
Prefoldin subunit 4 OS=Homo sapiens GN=PFDN4 PE=1 SV=1	PFDN4	Q9NQP4	4.53	15.305	134	8.95522	1	1	32000000	1	0	0	0	0	0	1	6.62936
Chimera CSNK2B-LY6G5B splicing isoform 991 OS=Homo sapiens GN=CSNK2B-LY6G5B--991 PE=2 SV=1	CSNK2B-LY6G5B--991	N0E472	4.64	34.783	304	3.61842	1	1	10000000	1	0	0	0	0	0	1	6.62936
Major centromere autoantigen B OS=Homo sapiens GN=CENPB PE=1 SV=2	CENPB	P07199	4.55	65.132	599	2.00334	1	1		1	0	0	0	0	0	1	6.62936
Cleavage and polyadenylation specificity factor subunit 1 OS=Homo sapiens GN=CPSF1 PE=1 SV=2	CPSF1	Q10570	6.4	160.782	1443	2.1483	2	2	37000000	4	0	0	0	0	0	4	6.62936
Telomerase-binding protein EST1A OS=Homo sapiens GN=SMG6 PE=1 SV=2	SMG6	Q86US8	7.05	160.362	1419	1.69133	2	2	12000000	2	0	0	0	0	0	2	6.62936
Fragile X mental retardation syndrome-related protein 1 OS=Homo sapiens GN=FXR1 PE=1 SV=3	FXR1	P51114	6.15	69.678	621	29.1465	13	11	180000000	16	0	0	0	0	0	16	6.62936
Eukaryotic translation initiation factor 4E type 2 OS=Homo sapiens GN=EIF4E2 PE=1 SV=1	EIF4E2	B9A023	7.03	21.899	189	33.8624	4	4	55000000	4	0	0	0	0	0	4	6.62936
PIH1 domain-containing protein 1 OS=Homo sapiens GN=PIH1D1 PE=1 SV=1	PIH1D1	Q9NWS0	5.14	32.342	290	41.3793	7	7	74000000	18	0	0	0	0	0	18	6.62936
Alternative protein ASNSD1 OS=Homo sapiens GN=ASNSD1 PE=1 SV=1	ASNSD1	L0R819	8.88	11.243	96	10.4167	1	1	30000000	1	0	0	0	0	0	1	6.62936
Exosome complex component MTR3 OS=Homo sapiens GN=EXOSC6 PE=1 SV=1	EXOSC6	Q5RKV6	6.28	28.218	272	19.1176	3	3	22000000	4	0	0	0	0	0	4	6.62936
Palladin OS=Homo sapiens GN=PALLD PE=1 SV=3	PALLD	Q8WX93	7.09	150.47	1383	0.795372	1	1	17000000	1	0	0	0	0	0	1	6.62936
Asparagine--tRNA ligase, cytoplasmic OS=Homo sapiens GN=NARS PE=1 SV=1	NARS	O43776	6.25	62.903	548	4.92701	2	2	3900000	2	0	0	0	0	0	2	6.62936
Coatomer subunit gamma-2 OS=Homo sapiens GN=COPG2 PE=1 SV=1	COPG2	Q9UBF2	5.81	97.56	871	5.16648	3	3	12000000	3	0	0	0	0	0	3	6.62936
Rho guanine nucleotide exchange factor 2 OS=Homo sapiens GN=ARHGEF2 PE=1 SV=1	ARHGEF2	V9GYM8	7.37	115.999	1031	20.0776	14	14	41000000	22	0	0	0	0	0	22	6.62936
ATPase ASNA1 OS=Homo sapiens GN=ASNA1 PE=1 SV=2	ASNA1	O43681	4.91	38.767	348	2.87356	1	1		1	0	0	0	0	0	1	6.62936
Isoform 3 of Coronin-1C OS=Homo sapiens GN=CORO1C	CORO1C	Q9ULV4-3	7.75	58.91	527	1.89753	1	1	8500000	1	0	0	0	0	0	1	6.62936
Isoform 2 of mRNA cap guanine-N7 methyltransferase OS=Homo sapiens GN=RNMT	RNMT	O43148-2	7.69	57.688	504	3.76984	1	1		1	0	0	0	0	0	1	6.62936
Transmembrane emp24 domain-containing protein 10 OS=Homo sapiens GN=TMED10 PE=1 SV=2	TMED10	P49755	7.44	24.96	219	10.5023	2	2	6700000	2	0	0	0	0	0	2	6.62936
Insulin gene enhancer protein ISL-1 OS=Homo sapiens GN=ISL1 PE=1 SV=1	ISL1	P61371	8.28	39.01	349	6.59026	2	2	4900000	2	0	0	0	0	0	2	6.62936
Segment polarity protein dishevelled homolog DVL-2 OS=Homo sapiens GN=DVL2 PE=1 SV=1	DVL2	I3L2N2	6.02	78.327	730	1.64384	1	1		1	0	0	0	0	0	1	6.62936
Peroxiredoxin-5, mitochondrial OS=Homo sapiens GN=PRDX5 PE=1 SV=4	PRDX5	P30044	8.7	22.073	214	3.73832	1	1		1	0	0	0	0	0	1	6.62936
Isoform 2 of DNA repair protein RAD50 OS=Homo sapiens GN=RAD50	RAD50	Q92878-2	6.89	154.491	1318	1.51745	2	2	6600000	2	0	0	0	0	0	2	6.62936
Formin-binding protein 1-like OS=Homo sapiens GN=FNBP1L PE=1 SV=1	FNBP1L	S4R347	6.64	70.482	609	1.64204	1	1	6400000	1	0	0	0	0	0	1	6.62936
Partitioning defective 3 homolog OS=Homo sapiens GN=PARD3 PE=1 SV=2	PARD3	Q8TEW0	7.68	151.33	1356	1.47493	2	2	15000000	3	0	0	0	0	0	3	6.62936
Pre-mRNA-splicing factor 38A OS=Homo sapiens GN=PRPF38A PE=1 SV=1	PRPF38A	Q8NAV1	9.96	37.453	312	16.0256	3	3	5100000	3	0	0	0	0	0	3	6.62936
Protein SMG9 OS=Homo sapiens GN=SMG9 PE=1 SV=1	SMG9	Q9H0W8	7.01	57.614	520	7.5	2	2	3300000	3	0	0	0	0	0	3	6.62936
Gem-associated protein 5 OS=Homo sapiens GN=GEMIN5 PE=1 SV=3	GEMIN5	Q8TEQ6	6.62	168.483	1508	0.994695	1	1	6500000	1	0	0	0	0	0	1	6.62936
Protein THEM6 OS=Homo sapiens GN=THEM6 PE=1 SV=2	THEM6	Q8WUY1	9.55	23.85	208	7.69231	2	2	10000000	2	0	0	0	0	0	2	6.62936
Conserved oligomeric Golgi complex subunit 2 OS=Homo sapiens GN=COG2 PE=1 SV=1	COG2	B7Z2Y2	7.11	76.032	679	4.56554	2	2	8800000	2	0	0	0	0	0	2	6.62936
Ran-specific GTPase-activating protein OS=Homo sapiens GN=RANBP1 PE=1 SV=1	RANBP1	F6WQW2	8.75	31.884	278	15.4676	3	3	29000000	4	0	0	0	0	0	4	6.62936
PDZ and LIM domain protein 7 OS=Homo sapiens GN=PDLIM7 PE=1 SV=1	PDLIM7	Q9NR12	8.41	49.813	457	1.96937	1	1	1600000	1	0	0	0	0	0	1	6.62936
Endothelial differentiation-related factor 1 OS=Homo sapiens GN=EDF1 PE=1 SV=1	EDF1	O60869	9.95	16.359	148	10.1351	1	1	5700000	1	0	0	0	0	0	1	6.62936
Hemoglobin subunit zeta OS=Homo sapiens GN=HBZ PE=1 SV=2	HBZ	P02008	8.21	15.627	142	4.92958	1	1	18000000	1	0	0	0	0	0	1	6.62936
26S proteasome non-ATPase regulatory subunit 3 OS=Homo sapiens GN=PSMD3 PE=1 SV=2	PSMD3	O43242	8.44	60.939	534	2.05993	1	1	5500000	1	0	0	0	0	0	1	6.62936
Serine/threonine-protein kinase SMG1 OS=Homo sapiens GN=SMG1 PE=1 SV=3	SMG1	Q96Q15	6.46	410.241	3661	3.25048	10	10	23000000	10	0	0	0	0	0	10	6.62936
Serine/threonine-protein kinase TBK1 OS=Homo sapiens GN=TBK1 PE=1 SV=1	TBK1	Q9UHD2	6.79	83.589	729	13.1687	6	6	26000000	8	0	0	0	0	0	8	6.62936
Isoform 3 of Cytoskeleton-associated protein 5 OS=Homo sapiens GN=CKAP5	CKAP5	Q14008-3	7.77	226.114	2039	5.0515	6	6	59000000	8	0	0	0	0	0	8	6.62936
Tryptophan--tRNA ligase, cytoplasmic OS=Homo sapiens GN=WARS PE=1 SV=2	WARS	P23381	6.23	53.132	471	3.39703	1	1	2000000	1	0	0	0	0	0	1	6.62936
Protein transport protein Sec23A OS=Homo sapiens GN=SEC23A PE=1 SV=2	SEC23A	Q15436	7.08	86.105	765	45.4902	22	20	420000000	41	0	0	0	0	0	41	6.62936
Isoform 2 of Trafficking protein particle complex subunit 9 OS=Homo sapiens GN=TRAPPC9	TRAPPC9	Q96Q05-2	7.21	139.349	1246	0.802568	1	1	5200000	1	0	0	0	0	0	1	6.62936
Unconventional prefoldin RPB5 interactor 1 OS=Homo sapiens GN=URI1 PE=1 SV=3	URI1	O94763	5.05	59.796	535	33.4579	15	15	87000000	23	0	0	0	0	0	23	6.62936
Isoform 2 of TNF receptor-associated factor 2 OS=Homo sapiens GN=TRAF2	TRAF2	Q12933-2	7.21	61.343	553	2.53165	1	1	7600000	1	0	0	0	0	0	1	6.62936
HZGJ OS=Homo sapiens GN=HZGJ PE=1 SV=1	HZGJ	Q86YQ0	8.12	84.667	765	23.3987	12	12	78000000	17	0	0	0	0	0	17	6.62936
Caprin-1 OS=Homo sapiens GN=CAPRIN1 PE=1 SV=2	CAPRIN1	Q14444	5.25	78.318	709	14.9506	5	5	24000000	10	0	0	0	0	0	10	6.62936
Integrator complex subunit 3 OS=Homo sapiens GN=INTS3 PE=1 SV=1	INTS3	Q68E01	5.8	117.994	1043	1.62991	1	1		1	0	0	0	0	0	1	6.62936
Putative helicase MOV-10 OS=Homo sapiens GN=MOV10 PE=1 SV=2	MOV10	Q9HCE1	8.82	113.599	1003	3.29013	3	3	9200000	3	0	0	0	0	0	3	6.62936
Nuclear pore complex protein Nup88 OS=Homo sapiens GN=NUP88 PE=1 SV=2	NUP88	Q99567	5.69	83.489	741	3.23887	2	2	24000000	2	0	0	0	0	0	2	6.62936
Tight junction protein 1 (Zona occludens 1), isoform CRA_a OS=Homo sapiens GN=TJP1 PE=1 SV=1	TJP1	G3V1L9	6.67	197.339	1768	0.678733	1	1		1	0	0	0	0	0	1	6.62936
Saccharopine dehydrogenase-like oxidoreductase OS=Homo sapiens GN=SCCPDH PE=1 SV=1	SCCPDH	Q8NBX0	9.14	47.121	429	6.52681	1	1	4200000	1	0	0	0	0	0	1	6.62936
Alpha-taxilin OS=Homo sapiens GN=TXLNA PE=1 SV=3	TXLNA	P40222	6.52	61.853	546	6.59341	1	1	4400000	2	0	0	0	0	0	2	6.62936
Aminoacyl tRNA synthase complex-interacting multifunctional protein 2 OS=Homo sapiens GN=AIMP2 PE=1 SV=2	AIMP2	A8MU58	8.07	26.743	242	5.3719	1	1	33000000	1	0	0	0	0	0	1	6.62936
Isoform 2 of AP-2 complex subunit beta OS=Homo sapiens GN=AP2B1	AP2B1	P63010-2	5.34	105.625	951	3.89064	3	3	33000000	3	0	0	0	0	0	3	6.62936
G-protein-signaling modulator 1 OS=Homo sapiens GN=GPSM1 PE=1 SV=1	GPSM1	A0A0A0MSK4	6.54	74.436	675	1.48148	1	1	4300000	1	0	0	0	0	0	1	6.62936
Nucleoporin Nup37 OS=Homo sapiens GN=NUP37 PE=1 SV=1	NUP37	Q8NFH4	5.92	36.684	326	4.60123	1	1	2900000	1	0	0	0	0	0	1	6.62936
Isoform 2 of Syntaxin-binding protein 1 OS=Homo sapiens GN=STXBP1	STXBP1	P61764-2	6.77	68.692	603	5.47264	2	2		2	0	0	0	0	0	2	6.62936
Lys-63-specific deubiquitinase BRCC36 (Fragment) OS=Homo sapiens GN=BRCC3 PE=1 SV=1	BRCC3	X6RJS7	6.39	25.74	226	5.75221	1	1		1	0	0	0	0	0	1	6.62936
Isoform 2 of Dynactin subunit 2 OS=Homo sapiens GN=DCTN2	DCTN2	Q13561-2	5.17	44.792	406	7.88177	3	3	15000000	4	0	0	0	0	0	4	6.62936
Isoform 2 of 26S proteasome non-ATPase regulatory subunit 13 OS=Homo sapiens GN=PSMD13	PSMD13	Q9UNM6-2	6.54	42.915	378	3.43915	1	1	2500000	2	0	0	0	0	0	2	6.62936
Vacuolar protein sorting-associated protein 26B OS=Homo sapiens GN=VPS26B PE=1 SV=2	VPS26B	Q4G0F5	7.36	39.13	336	3.27381	1	1	15000000	1	0	0	0	0	0	1	6.62936
26S protease regulatory subunit 4 OS=Homo sapiens GN=PSMC1 PE=1 SV=1	PSMC1	P62191	6.21	49.154	440	4.77273	2	1	9200000	2	0	0	0	0	0	2	6.62936
DnaJ homolog subfamily B member 1 OS=Homo sapiens GN=DNAJB1 PE=1 SV=4	DNAJB1	P25685	8.63	38.02	340	8.23529	2	2	8600000	2	0	0	0	0	0	2	6.62936
Isoform 2 of Aminoacyl tRNA synthase complex-interacting multifunctional protein 1 OS=Homo sapiens GN=AIMP1	AIMP1	Q12904-2	8.65	37.016	336	3.57143	1	1	7100000	1	0	0	0	0	0	1	6.62936
Trifunctional purine biosynthetic protein adenosine-3 OS=Homo sapiens GN=GART PE=1 SV=1	GART	F8WD69	6.3	32.262	306	7.51634	2	2	4200000	2	0	0	0	0	0	2	6.62936
Isoform 2 of C-terminal-binding protein 2 OS=Homo sapiens GN=CTBP2	CTBP2	P56545-2	8.02	106.121	985	2.03046	1	1		1	0	0	0	0	0	1	6.62936
CSNK2A1 protein OS=Homo sapiens GN=CSNK2A1 PE=1 SV=1	CSNK2A1	Q5U5J2	7.96	45.879	397	11.5869	3	3	20000000	5	0	0	0	0	0	5	6.62936
WD repeat-containing protein 26 OS=Homo sapiens GN=WDR26 PE=1 SV=3	WDR26	Q9H7D7	6.16	72.079	661	4.23601	2	2	6000000	2	0	0	0	0	0	2	6.62936
Coatomer protein complex, subunit epsilon, isoform CRA_g OS=Homo sapiens GN=COPE PE=1 SV=1	COPE	M0QXB4	5.16	36.901	331	6.0423	1	1	8800000	1	0	0	0	0	0	1	6.62936
Enhancer of mRNA-decapping protein 4 OS=Homo sapiens GN=EDC4 PE=1 SV=1	EDC4	Q6P2E9	5.86	151.567	1401	21.4847	19	19	180000000	36	0	0	0	0	0	36	6.62936
Eukaryotic translation initiation factor 3 subunit L OS=Homo sapiens GN=EIF3L PE=1 SV=1	EIF3L	B0QY89	6.65	70.857	607	18.6161	9	9	53000000	10	0	0	0	0	0	10	6.62936
ARF GTPase-activating protein GIT2 OS=Homo sapiens GN=GIT2 PE=1 SV=2	GIT2	Q14161	7.23	84.49	759	4.34783	3	2	27000000	3	0	0	0	0	0	3	6.62936
Regulator of nonsense transcripts 3B OS=Homo sapiens GN=UPF3B PE=1 SV=1	UPF3B	A0A087WYC8	8.57	25.217	217	34.1014	6	6	63000000	6	0	0	0	0	0	6	6.62936
Isoform 2 of Conserved oligomeric Golgi complex subunit 5 OS=Homo sapiens GN=COG5	COG5	Q9UP83-2	6.6	94.842	860	2.7907	2	2	5000000	2	0	0	0	0	0	2	6.62936
Uncharacterized protein C19orf43 OS=Homo sapiens GN=C19orf43 PE=1 SV=1	C19orf43	K7EN60	8.12	15.603	150	9.33333	1	1	5400000	1	0	0	0	0	0	1	6.62936
Eukaryotic translation initiation factor 4B OS=Homo sapiens GN=EIF4B PE=1 SV=1	EIF4B	E7EX17	5.67	69.657	616	11.526	5	5	9400000	5	0	0	0	0	0	5	6.62936
Regulator of nonsense transcripts 1 OS=Homo sapiens GN=UPF1 PE=1 SV=2	UPF1	Q92900	6.61	124.267	1129	37.5554	32	32	140000000	43	0	0	0	0	0	43	6.62936
Translational activator GCN1 OS=Homo sapiens GN=GCN1L1 PE=1 SV=6	GCN1L1	Q92616	7.47	292.572	2671	8.7982	17	17	27000000	19	0	0	0	0	0	19	6.62936
CCR4-NOT transcription complex subunit 2 OS=Homo sapiens GN=CNOT2 PE=1 SV=1	CNOT2	Q9NZN8	7.66	59.7	540	2.03704	1	1	830000	1	0	0	0	0	0	1	6.62936
Nuclear RNA export factor 1 OS=Homo sapiens GN=NXF1 PE=1 SV=1	NXF1	Q9UBU9	8.51	70.139	619	1.93861	1	1	7700000	1	0	0	0	0	0	1	6.62936
ELAV-like protein 3 OS=Homo sapiens GN=ELAVL3 PE=1 SV=3	ELAVL3	Q14576	9.28	39.522	367	19.6185	5	4	68000000	8	0	0	0	0	0	8	6.62936
Glucose-induced degradation protein 8 homolog OS=Homo sapiens GN=GID8 PE=1 SV=1	GID8	Q9NWU2	4.97	26.732	228	9.64912	1	1		1	0	0	0	0	0	1	6.62936
Testin OS=Homo sapiens GN=TES PE=1 SV=1	TES	Q9UGI8	7.68	47.964	421	16.6271	4	4	9900000	9	0	0	0	0	0	9	6.62936
Protein SMG5 OS=Homo sapiens GN=SMG5 PE=1 SV=3	SMG5	Q9UPR3	5.91	113.855	1016	0.688976	1	1		1	0	0	0	0	0	1	6.62936
Isoform 5 of Afadin OS=Homo sapiens GN=MLLT4	MLLT4	P55196-5	6.39	207.659	1834	0.545256	1	1	2300000	1	0	0	0	0	0	1	6.62936
Isoform 3 of Importin-5 OS=Homo sapiens GN=IPO5	IPO5	O00410-3	4.92	125.464	1115	4.75336	4	4	11000000	4	0	0	0	0	0	4	6.62936
Gephyrin OS=Homo sapiens GN=GPHN PE=1 SV=1	GPHN	F5H039	5.73	84.681	782	3.32481	2	2	11000000	2	0	0	0	0	0	2	6.62936
Isoform 2 of cAMP-dependent protein kinase catalytic subunit beta OS=Homo sapiens GN=PRKACB	PRKACB	P22694-2	8.69	46.207	398	2.26131	1	1	2200000	1	0	0	0	0	0	1	6.62936
SRSF protein kinase 1 OS=Homo sapiens GN=SRPK1 PE=1 SV=2	SRPK1	Q5R363	7.71	92.306	826	1.57385	1	1	1500000	1	0	0	0	0	0	1	6.62936
Y-box-binding protein 2 OS=Homo sapiens GN=YBX2 PE=1 SV=2	YBX2	Q9Y2T7	10.8	38.495	364	14.5604	3	1	170000000	8	0	0	0	0	0	8	6.62936
Double-stranded RNA-binding protein Staufen homolog 1 OS=Homo sapiens GN=STAU1 PE=1 SV=2	STAU1	O95793	9.44	63.143	577	2.42634	1	1	4600000	1	0	0	0	0	0	1	6.62936
Activator of 90 kDa heat shock protein ATPase homolog 1 OS=Homo sapiens GN=AHSA1 PE=1 SV=1	AHSA1	O95433	5.53	38.25	338	10.9467	2	2	5300000	3	0	0	0	0	0	3	6.62936
SWI/SNF-related matrix-associated actin-dependent regulator of chromatin subfamily D member 1 OS=Homo sapiens GN=SMARCD1 PE=1 SV=2	SMARCD1	Q96GM5	9.25	58.196	515	6.21359	2	1	14000000	3	0	0	0	0	0	3	6.62936
Vesicle-fusing ATPase OS=Homo sapiens GN=NSF PE=1 SV=3	NSF	P46459	6.95	82.542	744	1.6129	1	1	8000000	1	0	0	0	0	0	1	6.62936
Trafficking protein particle complex subunit 3 OS=Homo sapiens GN=TRAPPC3 PE=1 SV=1	TRAPPC3	A0A087WWM0	5.06	21.218	188	7.97872	1	1		1	0	0	0	0	0	1	6.62936
Isoform 2 of Vacuolar protein sorting-associated protein 28 homolog OS=Homo sapiens GN=VPS28	VPS28	Q9UK41-2	7.72	26.445	233	10.7296	1	1		1	0	0	0	0	0	1	6.62936
Ribonucleoside-diphosphate reductase large subunit OS=Homo sapiens GN=RRM1 PE=1 SV=1	RRM1	P23921	7.15	90.013	792	7.44949	3	3	61000000	6	0	0	0	0	0	6	6.62936
Cyclic AMP-responsive element-binding protein 5 OS=Homo sapiens GN=CREB5 PE=1 SV=3	CREB5	Q02930	8.5	56.882	508	1.37795	1	1	68000000	1	0	0	0	0	0	1	6.62936
Isoform 2 of Src substrate cortactin OS=Homo sapiens GN=CTTN	CTTN	Q14247-2	6.64	70.915	634	8.51735	5	5	9800000	5	0	0	0	0	0	5	6.62936
Protein BUD31 homolog OS=Homo sapiens GN=BUD31 PE=1 SV=2	BUD31	P41223	8.82	16.989	144	6.94444	1	1	7500000	1	0	0	0	0	0	1	6.62936
RING finger protein unkempt homolog OS=Homo sapiens GN=UNK PE=1 SV=2	UNK	Q9C0B0	6.86	88.029	810	1.23457	1	1	12000000	1	0	0	0	0	0	1	6.62936
Multivesicular body subunit 12A OS=Homo sapiens GN=MVB12A PE=1 SV=1	MVB12A	E9PJW8	8.53	20.752	199	9.04523	1	1	9100000	1	0	0	0	0	0	1	6.62936
Zinc finger protein 598 OS=Homo sapiens GN=ZNF598 PE=1 SV=1	ZNF598	Q86UK7	8.4	98.575	904	16.7035	10	10	37000000	14	0	0	0	0	0	14	6.62936
RNA-binding protein Musashi homolog 2 OS=Homo sapiens GN=MSI2 PE=1 SV=1	MSI2	B4DM51	9.04	28.758	267	13.4831	3	1	13000000	5	0	0	0	0	0	5	6.62936
Dihydropyrimidinase-related protein 4 OS=Homo sapiens GN=DPYSL4 PE=1 SV=2	DPYSL4	O14531	7.09	61.838	572	6.29371	2	2	4600000	2	0	0	0	0	0	2	6.62936
Cytoplasmic FMR1-interacting protein 1 OS=Homo sapiens GN=CYFIP1 PE=1 SV=1	CYFIP1	Q7L576	6.9	145.089	1253	2.7933	3	3	9400000	4	0	0	0	0	0	4	6.62936
Casein kinase I isoform delta OS=Homo sapiens GN=CSNK1D PE=1 SV=2	CSNK1D	P48730	9.74	47.3	415	3.37349	1	1	5500000	1	0	0	0	0	0	1	6.62936
cAMP-dependent protein kinase inhibitor alpha OS=Homo sapiens GN=PKIA PE=1 SV=2	PKIA	P61925	4.54	7.984	76	32.8947	1	1		1	0	0	0	0	0	1	6.62936
Isoform E of Nuclear factor of activated T-cells 5 OS=Homo sapiens GN=NFAT5	NFAT5	O94916-5	5.3	167.703	1549	21.0458	21	1	180000000	48	0	0	0	0	0	48	6.62936
Isoform 2 of Protein SOGA1 OS=Homo sapiens GN=SOGA1	SOGA1	O94964-2	6.52	183.744	1661	0.481638	1	1		1	0	0	0	0	0	1	6.62936
Emerin OS=Homo sapiens GN=EMD PE=1 SV=1	EMD	Q5HY57	5.02	24.923	219	5.47945	1	1	18000000	1	0	0	0	0	0	1	6.62936
Protein Smaug homolog 1 OS=Homo sapiens GN=SAMD4A PE=1 SV=3	SAMD4A	Q9UPU9	8.32	79.365	718	2.08914	1	1	4800000	1	0	0	0	0	0	1	6.62936
Gamma-glutamylcyclotransferase OS=Homo sapiens GN=GGCT PE=1 SV=1	GGCT	O75223	5.14	20.994	188	6.91489	1	1	3100000	1	0	0	0	0	0	1	6.62936
Isoform 5 of Ubiquitin-associated protein 2-like OS=Homo sapiens GN=UBAP2L	UBAP2L	Q14157-5	7.02	116.569	1104	16.3043	12	12	66000000	19	0	0	0	0	0	19	6.62936
Fragile X mental retardation syndrome-related protein 2 OS=Homo sapiens GN=FXR2 PE=1 SV=2	FXR2	P51116	6.23	74.178	673	12.63	7	5	150000000	8	0	0	0	0	0	8	6.62936
Cleavage stimulation factor subunit 1 OS=Homo sapiens GN=CSTF1 PE=1 SV=1	CSTF1	Q05048	6.58	48.327	431	9.28074	3	3	25000000	3	0	0	0	0	0	3	6.62936
Prefoldin subunit 5 OS=Homo sapiens GN=PFDN5 PE=1 SV=2	PFDN5	Q99471	6.33	17.317	154	36.3636	4	4	35000000	4	0	0	0	0	0	4	6.62936
Cyclin-dependent kinase 6 OS=Homo sapiens GN=CDK6 PE=1 SV=1	CDK6	Q00534	6.46	36.915	326	29.4479	8	8	46000000	8	0	0	0	0	0	8	6.62936
Isoform Long of Proteasome subunit alpha type-1 OS=Homo sapiens GN=PSMA1	PSMA1	P25786-2	6.99	30.22	269	3.71747	1	1	1200000	1	0	0	0	0	0	1	6.62936
Zyxin OS=Homo sapiens GN=ZYX PE=1 SV=1	ZYX	Q15942	6.67	61.238	572	8.39161	4	4	15000000	7	0	0	0	0	0	7	6.62936
Dynamin-2 OS=Homo sapiens GN=DNM2 PE=1 SV=2	DNM2	P50570	7.44	98.003	870	8.3908	4	4	18000000	5	0	0	0	0	0	5	6.62936
Glutamine--tRNA ligase OS=Homo sapiens GN=QARS PE=1 SV=1	QARS	F2Z2V6	9.57	10.737	100	16	1	1		1	0	0	0	0	0	1	6.62936
NudC domain-containing protein 3 OS=Homo sapiens GN=NUDCD3 PE=1 SV=3	NUDCD3	Q8IVD9	5.25	40.797	361	2.21607	1	1	2500000	1	0	0	0	0	0	1	6.62936
Coatomer subunit beta OS=Homo sapiens GN=COPB1 PE=1 SV=3	COPB1	P53618	6.05	107.074	953	3.35782	2	2	5900000	2	0	0	0	0	0	2	6.62936
Thioredoxin-dependent peroxide reductase, mitochondrial OS=Homo sapiens GN=PRDX3 PE=1 SV=3	PRDX3	P30048	7.78	27.675	256	4.29688	1	1		1	0	0	0	0	0	1	6.62936
Importin-9 OS=Homo sapiens GN=IPO9 PE=1 SV=3	IPO9	Q96P70	4.81	115.889	1041	0.864553	1	1	6400000	1	0	0	0	0	0	1	6.62936
Cleavage and polyadenylation specificity factor subunit 4 OS=Homo sapiens GN=CPSF4 PE=1 SV=1	CPSF4	O95639	8.31	30.235	269	4.08922	1	1		1	0	0	0	0	0	1	6.62936
Arginine--tRNA ligase, cytoplasmic OS=Homo sapiens GN=RARS PE=1 SV=2	RARS	P54136	6.68	75.331	660	4.39394	2	2	16000000	2	0	0	0	0	0	2	6.62936
Isoform 5 of Nuclear pore complex protein Nup214 OS=Homo sapiens GN=NUP214	NUP214	P35658-5	7.69	215.269	2093	2.67559	3	3	2900000	3	0	0	0	0	0	3	6.62936
Enhancer of mRNA-decapping protein 3 OS=Homo sapiens GN=EDC3 PE=1 SV=1	EDC3	H3BNJ7	7.12	6.162	57	38.5965	1	1		1	0	0	0	0	0	1	6.62936
S-phase kinase-associated protein 1 OS=Homo sapiens GN=SKP1 PE=1 SV=1	SKP1	E5RJR5	4.7	18.708	163	16.5644	2	2	3700000	2	0	0	0	0	0	2	6.62936
PERQ amino acid-rich with GYF domain-containing protein 1 OS=Homo sapiens GN=GIGYF1 PE=1 SV=2	GIGYF1	O75420	5.39	114.531	1035	2.31884	2	2	12000000	2	0	0	0	0	0	2	6.62936
Vesicle-trafficking protein SEC22b OS=Homo sapiens GN=SEC22B PE=1 SV=4	SEC22B	O75396	6.92	24.578	215	6.51163	1	1	14000000	1	0	0	0	0	0	1	6.62936
Putative ATP-dependent RNA helicase DHX57 OS=Homo sapiens GN=DHX57 PE=1 SV=2	DHX57	Q6P158	7.71	155.507	1386	2.5974	2	2	480000	2	0	0	0	0	0	2	6.62936
Isoform 2 of Serpin B12 OS=Homo sapiens GN=SERPINB12	SERPINB12	Q96P63-2	5.39	48.415	425	3.76471	1	1	12000000	1	0	0	0	0	0	1	6.62936
Structural maintenance of chromosomes protein 3 OS=Homo sapiens GN=SMC3 PE=1 SV=2	SMC3	Q9UQE7	7.18	141.454	1217	3.61545	3	3	7900000	4	0	0	0	0	0	4	6.62936
Dedicator of cytokinesis protein 7 OS=Homo sapiens GN=DOCK7 PE=1 SV=4	DOCK7	Q96N67	6.8	242.407	2140	4.43925	6	6	9900000	7	0	0	0	0	0	7	6.62936
U4/U6.U5 tri-snRNP-associated protein 1 OS=Homo sapiens GN=SART1 PE=1 SV=1	SART1	O43290	6.13	90.2	800	3.375	2	2	2500000	2	0	0	0	0	0	2	6.62936
G-protein coupled receptor 98 OS=Homo sapiens GN=GPR98 PE=1 SV=2	GPR98	Q8WXG9	4.64	692.637	6306	0.555027	1	1		1	0	0	0	0	0	1	6.62936
Protein arginine N-methyltransferase 1 OS=Homo sapiens GN=PRMT1 PE=1 SV=1	PRMT1	A0A087X1W2	5.68	32.672	285	25.614	5	5	39000000	7	0	0	0	0	0	7	6.62936
Isoform D of Nuclear factor of activated T-cells 5 OS=Homo sapiens GN=NFAT5	NFAT5	O94916-4	5.3	167.632	1548	20.9948	21	1	180000000	49	0	0	0	0	0	49	6.62936
Protein DPCD OS=Homo sapiens GN=DPCD PE=1 SV=2	DPCD	Q9BVM2	9.03	23.225	203	3.94089	1	1	25000000	1	0	0	0	0	0	1	6.62936
Archain 1, isoform CRA_a OS=Homo sapiens GN=ARCN1 PE=1 SV=1	ARCN1	B0YIW6	5.85	61.587	552	3.62319	2	2	17000000	2	0	0	0	0	0	2	6.62936
Isoform 8 of Eukaryotic translation initiation factor 4 gamma 1 OS=Homo sapiens GN=EIF4G1	EIF4G1	Q04637-8	5.33	175.51	1600	12.0625	13	13	26000000	17	0	0	0	0	0	17	6.62936
60S ribosomal protein L36 OS=Homo sapiens GN=RPL36 PE=1 SV=3	RPL36	Q9Y3U8	11.59	12.246	105	20	2	2	31000000	2	0	0	0	0	0	2	6.62936
Eukaryotic translation initiation factor 4 gamma 2 (Fragment) OS=Homo sapiens GN=EIF4G2 PE=1 SV=1	EIF4G2	H0YCH5	9.19	49.621	444	6.30631	2	2	7800000	4	0	0	0	0	0	4	6.62936
Transcription factor HIVEP2 OS=Homo sapiens GN=HIVEP2 PE=1 SV=2	HIVEP2	P31629	6.96	268.885	2446	5.43745	8	8	18000000	10	0	0	0	0	0	10	6.62936
Gamma-tubulin complex component 3 OS=Homo sapiens GN=TUBGCP3 PE=1 SV=2	TUBGCP3	Q96CW5	8.12	103.506	907	23.5943	16	16	140000000	24	0	0	0	0	0	24	6.62936
Replication protein A 70 kDa DNA-binding subunit OS=Homo sapiens GN=RPA1 PE=1 SV=2	RPA1	P27694	7.21	68.095	616	2.5974	1	1	2200000	1	0	0	0	0	0	1	6.62936
Eukaryotic translation initiation factor 3 subunit H OS=Homo sapiens GN=EIF3S3 PE=1 SV=1	EIF3S3	B3KS98	7.33	41.555	366	28.6885	6	6	41000000	8	0	0	0	0	0	8	6.62936
Membrane-associated phosphatidylinositol transfer protein 3 OS=Homo sapiens GN=PITPNM3 PE=1 SV=2	PITPNM3	Q9BZ71	7.14	106.714	974	2.05339	1	1	150000000	1	0	0	0	0	0	1	6.62936
Microtubule-associated protein RP/EB family member 1 OS=Homo sapiens GN=MAPRE1 PE=1 SV=3	MAPRE1	Q15691	5.14	29.98	268	2.98507	1	1	20000000	2	0	0	0	0	0	2	6.62936
Ubiquilin-4 OS=Homo sapiens GN=UBQLN4 PE=1 SV=2	UBQLN4	Q9NRR5	5.22	63.812	601	2.82862	1	1	18000000	1	0	0	0	0	0	1	6.62936
Isoleucine--tRNA ligase, cytoplasmic OS=Homo sapiens GN=IARS PE=1 SV=2	IARS	P41252	6.15	144.406	1262	8.47861	8	8	29000000	11	0	0	0	0	0	11	6.62936
Programmed cell death protein 6 OS=Homo sapiens GN=PDCD6 PE=1 SV=1	PDCD6	A0A087WZ38	5.21	13.95	123	8.94309	1	1	110000000	2	0	0	0	0	0	2	6.62936
Mitotic spindle-associated MMXD complex subunit MIP18 OS=Homo sapiens GN=FAM96B PE=1 SV=1	FAM96B	Q9Y3D0	5.19	17.652	163	13.4969	1	1	9000000	1	0	0	0	0	0	1	6.62936
COMM domain-containing protein 2 OS=Homo sapiens GN=COMMD2 PE=1 SV=2	COMMD2	Q86X83	6.73	22.731	199	3.51759	1	1	5800000	1	0	0	0	0	0	1	6.62936
Isoform 3 of ARF GTPase-activating protein GIT1 OS=Homo sapiens GN=GIT1	GIT1	Q9Y2X7-3	7.01	85.393	770	11.4286	5	4	26000000	7	0	0	0	0	0	7	6.62936
Isoform 5 of AP-3 complex subunit delta-1 OS=Homo sapiens GN=AP3D1	AP3D1	O14617-5	7.64	136.565	1215	0.658436	1	1	1300000	1	0	0	0	0	0	1	6.62936
Serine/threonine-protein phosphatase 2A 56 kDa regulatory subunit delta isoform OS=Homo sapiens GN=PPP2R5D PE=1 SV=1	PPP2R5D	Q14738	8.13	69.947	602	2.15947	1	1		1	0	0	0	0	0	1	6.62936
Polyadenylate-binding protein-interacting protein 1 OS=Homo sapiens GN=PAIP1 PE=1 SV=1	PAIP1	D6R9H8	5.47	29.159	266	7.14286	1	1	21000000	1	0	0	0	0	0	1	6.62936
RNA-binding protein Musashi homolog 1 OS=Homo sapiens GN=MSI1 PE=1 SV=1	MSI1	O43347	7.85	39.099	362	10.221	3	1	12000000	5	0	0	0	0	0	5	6.62936
Probable ATP-dependent RNA helicase DDX6 OS=Homo sapiens GN=DDX6 PE=1 SV=2	DDX6	P26196	8.66	54.382	483	19.8758	7	7	54000000	8	0	0	0	0	0	8	6.62936
26S proteasome non-ATPase regulatory subunit 4 OS=Homo sapiens GN=PSMD4 PE=1 SV=1	PSMD4	Q5VWC4	4.81	41.053	380	3.94737	1	1		2	0	0	0	0	0	2	6.62936
Nucleosome assembly protein 1-like 1 OS=Homo sapiens GN=NAP1L1 PE=1 SV=1	NAP1L1	F8W543	4.56	38.176	328	12.1951	3	2	16000000	5	0	0	0	0	0	5	6.62936
Protein ERGIC-53 OS=Homo sapiens GN=LMAN1 PE=1 SV=2	LMAN1	P49257	6.77	57.513	510	2.15686	1	1		1	0	0	0	0	0	1	6.62936
Isoform 3 of Pumilio homolog 2 OS=Homo sapiens GN=PUM2	PUM2	Q8TB72-3	7.08	113.933	1064	3.85338	3	1	17000000	4	0	0	0	0	0	4	6.62936
Prefoldin subunit 2 OS=Homo sapiens GN=PFDN2 PE=1 SV=1	PFDN2	Q9UHV9	6.58	16.638	154	36.3636	5	5	260000000	7	0	0	0	0	0	7	6.62936
RNA-binding protein MEX3A OS=Homo sapiens GN=MEX3A PE=1 SV=1	MEX3A	A1L020	7.27	54.139	520	31.7308	10	10	71000000	14	0	0	0	0	0	14	6.62936
CCR4-NOT transcription complex subunit 1 OS=Homo sapiens GN=CNOT1 PE=1 SV=2	CNOT1	A5YKK6	7.11	266.768	2376	2.56734	6	6	13000000	6	0	0	0	0	0	6	6.62936
Sister chromatid cohesion protein PDS5 homolog B OS=Homo sapiens GN=PDS5B PE=1 SV=1	PDS5B	Q9NTI5	8.47	164.563	1447	0.829302	1	1	11000000	1	0	0	0	0	0	1	6.62936
Hsp90 co-chaperone Cdc37 OS=Homo sapiens GN=CDC37 PE=1 SV=1	CDC37	Q16543	5.25	44.44	378	12.6984	3	3	72000000	4	0	0	0	0	0	4	6.62936
Zinc finger protein ubi-d4 OS=Homo sapiens GN=DPF2 PE=1 SV=1	DPF2	J3KMZ8	6.98	45.751	405	3.95062	1	1	15000000	1	0	0	0	0	0	1	6.62936
Isoform 5 of Rho guanine nucleotide exchange factor 7 OS=Homo sapiens GN=ARHGEF7	ARHGEF7	Q14155-5	6.84	82.519	731	12.0383	6	6	5600000	10	0	0	0	0	0	10	6.62936
Importin subunit alpha-1 OS=Homo sapiens GN=KPNA2 PE=1 SV=1	KPNA2	P52292	5.4	57.826	529	1.70132	1	1		1	0	0	0	0	0	1	6.62936
Ig gamma-3 chain C region OS=Homo sapiens GN=IGHG3 PE=1 SV=1	IGHG3	A0A087WXL8	8.25	56.853	517	2.12766	1	1	5300000	1	0	0	0	0	0	1	6.62936
Nuclear pore complex protein Nup133 OS=Homo sapiens GN=NUP133 PE=1 SV=2	NUP133	Q8WUM0	5.1	128.898	1156	2.76817	2	2	7900000	4	0	0	0	0	0	4	6.62936
Protein LSM14 homolog A OS=Homo sapiens GN=LSM14A PE=1 SV=3	LSM14A	Q8ND56	9.52	50.499	463	10.5832	4	4	18000000	4	0	0	0	0	0	4	6.62936
Sacsin OS=Homo sapiens GN=SACS PE=1 SV=2	SACS	Q9NZJ4	7.05	520.795	4579	0.262066	1	1		1	0	0	0	0	0	1	6.62936
Telomere length regulation protein TEL2 homolog OS=Homo sapiens GN=TELO2 PE=1 SV=2	TELO2	Q9Y4R8	5.76	91.689	837	2.27001	2	2	13000000	2	0	0	0	0	0	2	6.62936
CTP synthase 1 OS=Homo sapiens GN=CTPS1 PE=1 SV=2	CTPS1	P17812	6.46	66.648	591	3.38409	2	1	18000000	2	0	0	0	0	0	2	6.62936
p53 and DNA damage-regulated protein 1 OS=Homo sapiens GN=PDRG1 PE=1 SV=2	PDRG1	Q9NUG6	6.06	15.501	133	36.8421	4	4	41000000	4	0	0	0	0	0	4	6.62936
Pre-mRNA-splicing factor SPF27 OS=Homo sapiens GN=BCAS2 PE=1 SV=1	BCAS2	O75934	5.66	26.115	225	10.2222	1	1	7700000	1	0	0	0	0	0	1	6.62936
Microtubule-associated protein 2 OS=Homo sapiens GN=MAP2 PE=1 SV=4	MAP2	P11137	4.91	199.404	1827	2.07991	3	3	15000000	3	0	0	0	0	0	3	6.62936
Leucine--tRNA ligase, cytoplasmic OS=Homo sapiens GN=LARS PE=1 SV=2	LARS	Q9P2J5	7.3	134.379	1176	3.31633	4	4	21000000	4	0	0	0	0	0	4	6.62936
Isoform B of Nucleoporin SEH1 OS=Homo sapiens GN=SEH1L	SEH1L	Q96EE3-1	7.9	46.549	421	8.31354	3	3	5700000	3	0	0	0	0	0	3	6.62936
Sequestosome-1 OS=Homo sapiens GN=SQSTM1 PE=1 SV=1	SQSTM1	Q13501	5.22	47.657	440	9.09091	2	2	13000000	3	0	0	0	0	0	3	6.62936
Isoform 2 of Cystathionine beta-synthase OS=Homo sapiens GN=CBS	CBS	P35520-2	6.44	61.824	565	7.9646	3	3	7000000	3	0	0	0	0	0	3	6.62936
Ataxin-2 OS=Homo sapiens GN=ATXN2 PE=1 SV=2	ATXN2	Q99700	9.57	140.196	1313	11.9573	12	11	27000000	18	0	0	0	0	0	18	6.62936
Tubulin gamma-1 chain OS=Homo sapiens GN=TUBG1 PE=1 SV=2	TUBG1	P23258	6.14	51.138	451	69.8448	18	18	260000000	49	0	0	0	0	0	49	6.62936
COP9 signalosome complex subunit 6 OS=Homo sapiens GN=COPS6 PE=1 SV=1	COPS6	Q7L5N1	5.73	36.14	327	7.03364	2	2	8300000	2	0	0	0	0	0	2	6.62936
ELAV-like protein OS=Homo sapiens GN=ELAVL4 PE=1 SV=1	ELAVL4	B1APY8	9.38	42.371	385	10.6494	3	2	20000000	3	0	0	0	0	0	3	6.62936
26S protease regulatory subunit 8 OS=Homo sapiens GN=PSMC5 PE=1 SV=1	PSMC5	P62195	7.55	45.597	406	6.15764	2	1	6300000	2	0	0	0	0	0	2	6.62936
Copine-1 OS=Homo sapiens GN=CPNE1 PE=1 SV=1	CPNE1	A6PVH9	5.82	53.014	481	11.6424	4	4	21000000	4	0	0	0	0	0	4	6.62936
Uncharacterized protein C15orf52 OS=Homo sapiens GN=C15orf52 PE=1 SV=1	C15orf52	Q6ZUT6	9.13	57.29	534	2.05993	1	1	4100000	1	0	0	0	0	0	1	6.62936
Probable ATP-dependent RNA helicase DDX20 OS=Homo sapiens GN=DDX20 PE=1 SV=2	DDX20	Q9UHI6	6.95	92.183	824	4.00485	2	2	13000000	2	0	0	0	0	0	2	6.62936
Unconventional myosin-Ib OS=Homo sapiens GN=MYO1B PE=1 SV=3	MYO1B	O43795	9.38	131.902	1136	8.53873	6	5	6600000	6	0	0	0	0	0	6	6.62936
CREB-regulated transcription coactivator 3 OS=Homo sapiens GN=CRTC3 PE=1 SV=2	CRTC3	Q6UUV7	6.84	66.918	619	4.20032	1	1	20000000	1	0	0	0	0	0	1	6.62936
Endophilin-A2 OS=Homo sapiens GN=SH3GL1 PE=1 SV=1	SH3GL1	Q99961	5.43	41.464	368	3.26087	1	1		1	0	0	0	0	0	1	6.62936
Protein transport protein Sec24C OS=Homo sapiens GN=SEC24C PE=1 SV=3	SEC24C	P53992	7.06	118.249	1094	27.5137	21	21	210000000	37	0	0	0	0	0	37	6.62936
Eukaryotic translation initiation factor 1 OS=Homo sapiens GN=EIF1 PE=1 SV=1	EIF1	K7EM18	7.9	13.599	121	12.3967	1	1		1	0	0	0	0	0	1	6.62936
Putative adenosylhomocysteinase 2 OS=Homo sapiens GN=AHCYL1 PE=1 SV=2	AHCYL1	O43865	6.89	58.913	530	7.73585	3	1	23000000	4	0	0	0	0	0	4	6.62936
Gamma-enolase OS=Homo sapiens GN=ENO2 PE=1 SV=3	ENO2	P09104	5.03	47.239	434	7.60369	2	1	6500000	2	0	0	0	0	0	2	6.62936
Eukaryotic translation initiation factor 3 subunit E OS=Homo sapiens GN=EIF3E PE=1 SV=1	EIF3E	E5RIP5	6.24	5.397	45	28.8889	1	1	8500000	2	0	0	0	0	0	2	6.62936
Leucine-rich repeat and IQ domain-containing protein 1 OS=Homo sapiens GN=LRRIQ1 PE=2 SV=3	LRRIQ1	Q96JM4	6.19	199.176	1722	0.464576	1	1	99000000	1	0	0	0	0	0	1	6.62936
CREB-binding protein OS=Homo sapiens GN=CREBBP PE=1 SV=3	CREBBP	Q92793	8.53	265.182	2442	1.4742	3	3	13000000	3	0	0	0	0	0	3	6.62936
26S protease regulatory subunit 7 OS=Homo sapiens GN=PSMC2 PE=1 SV=3	PSMC2	P35998	5.95	48.603	433	2.54042	1	1	9200000	1	0	0	0	0	0	1	6.62936
LIM domain-binding protein 1 OS=Homo sapiens GN=LDB1 PE=1 SV=2	LDB1	Q86U70	6.96	46.502	411	2.43309	1	1	5100000	1	0	0	0	0	0	1	6.62936
Isoform 2 of Serine/threonine-protein kinase 3 OS=Homo sapiens GN=STK3	STK3	Q13188-2	5.25	59.424	519	2.50482	1	1		1	0	0	0	0	0	1	6.62936
40S ribosomal protein S21 OS=Homo sapiens GN=RPS21 PE=1 SV=1	RPS21	Q9BYK1	7.83	9.888	90	10	1	1	30000000	1	0	0	0	0	0	1	6.62936
Pumilio homolog 1 OS=Homo sapiens GN=PUM1 PE=1 SV=1	PUM1	Q5T1Z4	6.84	126.678	1189	5.29857	5	3	18000000	6	0	0	0	0	0	6	6.62936
Protein phosphatase 1 regulatory subunit 12A OS=Homo sapiens GN=PPP1R12A PE=1 SV=1	PPP1R12A	O14974	5.4	115.211	1030	3.39806	2	2	4900000	2	0	0	0	0	0	2	6.62936
Importin-7 OS=Homo sapiens GN=IPO7 PE=1 SV=1	IPO7	O95373	4.82	119.44	1038	7.12909	6	6	47000000	8	0	0	0	0	0	8	6.62936
Putative adenosylhomocysteinase 3 OS=Homo sapiens GN=AHCYL2 PE=1 SV=1	AHCYL2	Q96HN2	7.36	66.678	611	4.90998	3	1	15000000	4	0	0	0	0	0	4	6.62936
Protein argonaute-2 OS=Homo sapiens GN=AGO2 PE=1 SV=3	AGO2	Q9UKV8	9.19	97.146	859	5.93714	4	4	9700000	4	0	0	0	0	0	4	6.62936
Ataxin-2-like protein OS=Homo sapiens GN=ATXN2L PE=1 SV=2	ATXN2L	Q8WWM7	8.59	113.304	1075	12.7442	9	8	41000000	11	0	0	0	0	0	11	6.62936
Vacuolar protein sorting-associated protein 16 homolog OS=Homo sapiens GN=VPS16 PE=1 SV=2	VPS16	Q9H269	6.77	94.634	839	1.54946	1	1	8200000	1	0	0	0	0	0	1	6.62936
Eukaryotic translation initiation factor 3 subunit D OS=Homo sapiens GN=EIF3D PE=1 SV=1	EIF3D	O15371	6.05	63.932	548	16.2409	6	6	40000000	7	0	0	0	0	0	7	6.62936
Protein UXT OS=Homo sapiens GN=UXT PE=4 SV=1	UXT	A0A0C4DFR8	7.12	19.584	169	18.3432	3	3	37000000	3	0	0	0	0	0	3	6.62936
Transducin beta-like protein 2 OS=Homo sapiens GN=TBL2 PE=1 SV=1	TBL2	E9PF19	9.48	45.906	411	9.00243	2	2	7100000	4	0	0	0	0	0	4	6.62936
Histone-arginine methyltransferase CARM1 OS=Homo sapiens GN=CARM1 PE=1 SV=3	CARM1	Q86X55	6.73	65.811	608	5.09868	2	2	4800000	2	0	0	0	0	0	2	6.62936
Dedicator of cytokinesis protein 4 (Fragment) OS=Homo sapiens GN=DOCK4 PE=1 SV=1	DOCK4	H0Y599	7.8	228.488	1999	0.650325	1	1		1	0	0	0	0	0	1	6.62936
Eukaryotic translation initiation factor 3 subunit F OS=Homo sapiens GN=EIF3F PE=1 SV=1	EIF3F	O00303	5.45	37.54	357	38.6555	9	9	81000000	12	0	0	0	0	0	12	6.62936
Isoform 4 of Kinesin-like protein KIF2A OS=Homo sapiens GN=KIF2A	KIF2A	O00139-4	6.37	84.037	744	19.086	14	14	58000000	17	0	0	0	0	0	17	6.62936
Isoform 2 of Centrosomal protein of 97 kDa OS=Homo sapiens GN=CEP97	CEP97	Q8IW35-2	5.08	99.846	891	7.63187	5	5	12000000	5	0	0	0	0	0	5	6.62936
60S ribosomal protein L35a OS=Homo sapiens GN=RPL35A PE=1 SV=2	RPL35A	P18077	11.06	12.53	110	10.9091	1	1	23000000	1	0	0	0	0	0	1	6.62936
Probable cytosolic iron-sulfur protein assembly protein CIAO1 OS=Homo sapiens GN=CIAO1 PE=1 SV=1	CIAO1	O76071	4.97	37.816	339	4.71976	1	1		1	0	0	0	0	0	1	6.62936
Exosome complex component RRP4 OS=Homo sapiens GN=EXOSC2 PE=1 SV=2	EXOSC2	Q13868	7.5	32.768	293	5.11945	1	1		1	0	0	0	0	0	1	6.62936
Structural maintenance of chromosomes protein 1A OS=Homo sapiens GN=SMC1A PE=1 SV=2	SMC1A	Q14683	7.64	143.144	1233	0.729927	1	1	5300000	1	0	0	0	0	0	1	6.62936
Bromodomain-containing protein 3 OS=Homo sapiens GN=BRD3 PE=1 SV=1	BRD3	Q15059	9.36	79.492	726	1.79063	1	1	3300000	1	0	0	0	0	0	1	6.62936
Elongation factor 1-delta OS=Homo sapiens GN=EEF1D PE=1 SV=1	EEF1D	A0A087X1X7	7.21	69.24	631	3.80349	1	1	4000000	1	0	0	0	0	0	1	6.62936
La-related protein 4B OS=Homo sapiens GN=LARP4B PE=1 SV=3	LARP4B	Q92615	6.92	80.503	738	3.38753	2	2	15000000	2	0	0	0	0	0	2	6.62936
Isoform 2 of LIM and SH3 domain protein 1 OS=Homo sapiens GN=LASP1	LASP1	Q14847-2	8.62	35.991	323	13.6223	1	1		2	0	0	0	0	0	2	6.62936
Conserved oligomeric Golgi complex subunit 1 OS=Homo sapiens GN=COG1 PE=1 SV=1	COG1	A0A087WVI0	7.21	104.721	940	4.46809	2	2	18000000	5	0	0	0	0	0	5	6.62936
Abl interactor 2 OS=Homo sapiens GN=ABI2 PE=1 SV=2	ABI2	F8WAL6	6.02	55.648	513	5.06823	2	2	9700000	2	0	0	0	0	0	2	6.62936
Coiled-coil domain-containing protein 9 OS=Homo sapiens GN=CCDC9 PE=1 SV=1	CCDC9	Q9Y3X0	5.4	59.667	531	15.8192	7	7	48000000	11	0	0	0	0	0	11	6.62936
Isoform 2 of Nck-associated protein 1 OS=Homo sapiens GN=NCKAP1	NCKAP1	Q9Y2A7-2	6.68	129.433	1134	5.64374	5	5	14000000	5	0	0	0	0	0	5	6.62936
Guanine nucleotide exchange factor VAV3 OS=Homo sapiens GN=VAV3 PE=1 SV=1	VAV3	Q9UKW4	7.05	97.713	847	1.06257	1	1	4500000	1	0	0	0	0	0	1	6.62936
Sorting nexin-27 OS=Homo sapiens GN=SNX27 PE=1 SV=2	SNX27	Q96L92	6.49	61.226	541	1.66359	1	1	2900000	1	0	0	0	0	0	1	6.62936
Sphingosine-1-phosphate lyase 1 OS=Homo sapiens GN=SGPL1 PE=1 SV=3	SGPL1	O95470	9.16	63.483	568	8.09859	3	3	4200000	3	0	0	0	0	0	3	6.62936
cAMP-dependent protein kinase type II-beta regulatory subunit OS=Homo sapiens GN=PRKAR2B PE=1 SV=3	PRKAR2B	P31323	4.92	46.273	418	3.58852	1	1	10000000	1	0	0	0	0	0	1	6.62936
Exosome complex component RRP43 OS=Homo sapiens GN=EXOSC8 PE=1 SV=1	EXOSC8	Q96B26	5.3	30.02	276	4.71014	1	1	8500000	1	0	0	0	0	0	1	6.62936
Calpain small subunit 1 OS=Homo sapiens GN=CAPNS1 PE=4 SV=1	CAPNS1	A0A0C4DGQ5	6.23	33.765	322	7.76398	2	2	7700000	2	0	0	0	0	0	2	6.62936
Isoform 4 of Cold shock domain-containing protein E1 OS=Homo sapiens GN=CSDE1	CSDE1	O75534-4	6.52	93.683	844	7.22749	5	5	15000000	7	0	0	0	0	0	7	6.62936
Zinc finger CCCH-type antiviral protein 1 OS=Homo sapiens GN=ZC3HAV1 PE=1 SV=3	ZC3HAV1	Q7Z2W4	8.4	101.367	902	3.65854	2	2	11000000	2	0	0	0	0	0	2	6.62936
Profilin 2, isoform CRA_d OS=Homo sapiens GN=PFN2 PE=1 SV=1	PFN2	G5E9Q6	7.52	20.773	188	7.44681	1	1	27000000	2	0	0	0	0	0	2	6.62936
PERQ amino acid-rich with GYF domain-containing protein 2 (Fragment) OS=Homo sapiens GN=GIGYF2 PE=1 SV=1	GIGYF2	B8ZZD2	4.81	20.339	176	3.40909	1	0	18000000	1	0	0	0	0	0	1	6.62936
Partner of Y14 and mago OS=Homo sapiens GN=WIBG PE=1 SV=1	WIBG	Q9BRP8	9.45	22.642	204	8.82353	1	1	3000000	1	0	0	0	0	0	1	6.62936
Isoform 5 of Rap1 GTPase-GDP dissociation stimulator 1 OS=Homo sapiens GN=RAP1GDS1	RAP1GDS1	P52306-5	5.31	66.346	608	6.90789	3	3	10000000	4	0	0	0	0	0	4	6.62936
Tyrosine-protein phosphatase non-receptor type 23 OS=Homo sapiens GN=PTPN23 PE=1 SV=1	PTPN23	Q9H3S7	6.92	178.861	1636	0.672372	1	1	4100000	1	0	0	0	0	0	1	6.62936
Exosome complex component RRP41 (Fragment) OS=Homo sapiens GN=EXOSC4 PE=1 SV=4	EXOSC4	E9PI41	6.44	28.324	261	11.8774	2	2	17000000	2	0	0	0	0	0	2	6.62936
Interferon regulatory factor 2-binding protein 2 OS=Homo sapiens GN=IRF2BP2 PE=1 SV=2	IRF2BP2	Q7Z5L9	8.69	60.987	587	2.55537	1	1	78000000	1	0	0	0	0	0	1	6.62936
Fibronectin type III and SPRY domain-containing protein 1 OS=Homo sapiens GN=FSD1 PE=1 SV=1	FSD1	Q9BTV5	6.99	55.784	496	2.21774	1	1	5600000	1	0	0	0	0	0	1	6.62936
60S ribosomal protein L21 OS=Homo sapiens GN=RPL21 PE=1 SV=2	RPL21	P46778	10.49	18.553	160	9.375	1	1	11000000	1	0	0	0	0	0	1	6.62936
Exportin-7 OS=Homo sapiens GN=XPO7 PE=1 SV=1	XPO7	E7ESC6	6.48	123.987	1088	1.83824	2	2	4700000	2	0	0	0	0	0	2	6.62936
Protein HSPE1-MOB4 OS=Homo sapiens GN=HSPE1-MOB4 PE=3 SV=1	HSPE1-MOB4	S4R3N1	6.16	29.718	261	3.44828	1	1	14000000	1	0	0	0	0	0	1	6.62936
Pleckstrin homology domain-containing family A member 6 OS=Homo sapiens GN=PLEKHA6 PE=1 SV=1	PLEKHA6	Q5VTI5	8.92	119.218	1068	1.77903	1	1		1	0	0	0	0	0	1	6.62936
Huntingtin-interacting protein 1 OS=Homo sapiens GN=HIP1 PE=1 SV=5	HIP1	O00291	5.3	116.148	1037	1.63934	1	1	2500000	1	0	0	0	0	0	1	6.62936
Mitotic-spindle organizing protein 1 OS=Homo sapiens GN=MZT1 PE=1 SV=2	MZT1	Q08AG7	4.78	8.473	82	19.5122	1	1	190000000	1	0	0	0	0	0	1	6.62936
Eukaryotic translation initiation factor 3 subunit G OS=Homo sapiens GN=EIF3G PE=1 SV=2	EIF3G	O75821	6.13	35.589	320	15.3125	4	4	34000000	5	0	0	0	0	0	5	6.62936
AT-rich interactive domain-containing protein 1A OS=Homo sapiens GN=ARID1A PE=1 SV=3	ARID1A	O14497	6.7	241.892	2285	1.4442	2	2	6400000	2	0	0	0	0	0	2	6.62936
Bifunctional glutamate/proline--tRNA ligase OS=Homo sapiens GN=EPRS PE=1 SV=5	EPRS	P07814	7.33	170.483	1512	6.01852	7	7	17000000	8	0	0	0	0	0	8	6.62936
CCR4-NOT transcription complex subunit 7 OS=Homo sapiens GN=CNOT7 PE=1 SV=3	CNOT7	Q9UIV1	4.84	32.724	285	10.8772	2	2	7300000	3	0	0	0	0	0	3	6.62936
40S ribosomal protein S26 OS=Homo sapiens GN=RPS26 PE=1 SV=3	RPS26	P62854	11	13.007	115	20.8696	2	2	160000000	2	0	0	0	0	0	2	6.62936
Conserved oligomeric Golgi complex subunit 7 OS=Homo sapiens GN=COG7 PE=1 SV=1	COG7	P83436	5.47	86.289	770	3.76623	2	2	14000000	2	0	0	0	0	0	2	6.62936
Isoform 2 of Exosome complex component RRP45 OS=Homo sapiens GN=EXOSC9	EXOSC9	Q06265-2	5.3	50.771	456	2.19298	1	1	8400000	1	0	0	0	0	0	1	6.62936
Splicing regulator RBM11 OS=Homo sapiens GN=RBM11 PE=1 SV=1	RBM11	P57052	8.73	32.159	281	2.4911	1	1		1	0	0	0	0	0	1	6.62936
Cytochrome c oxidase subunit NDUFA4 OS=Homo sapiens GN=NDUFA4 PE=1 SV=1	NDUFA4	O00483	9.38	9.364	81	9.87654	1	1	17000000	1	0	0	0	0	0	1	6.62936
Unconventional myosin-Ia OS=Homo sapiens GN=MYO1A PE=1 SV=1	MYO1A	Q9UBC5	9.31	118.326	1043	2.58869	2	1	400000000	2	0	0	0	0	0	2	6.62936
Isoform 3 of Gamma-tubulin complex component 2 OS=Homo sapiens GN=TUBGCP2	TUBGCP2	Q9BSJ2-4	7.08	105.561	930	28.7097	19	19	120000000	27	0	0	0	0	0	27	6.62936
Gamma-tubulin complex component 6 OS=Homo sapiens GN=TUBGCP6 PE=1 SV=3	TUBGCP6	Q96RT7	6.32	200.372	1819	2.96866	3	3	24000000	3	0	0	0	0	0	3	6.62936
Isoform 3 of Tudor domain-containing protein 3 OS=Homo sapiens GN=TDRD3	TDRD3	Q9H7E2-3	9	83.052	744	1.34409	1	1	30000000	1	0	0	0	0	0	1	6.62936
WASH complex subunit FAM21C OS=Homo sapiens GN=FAM21C PE=1 SV=1	FAM21C	A0A0A0MR88	4.81	146.966	1341	0.969426	1	1	2900000	1	0	0	0	0	0	1	6.62936
E3 ubiquitin/ISG15 ligase TRIM25 OS=Homo sapiens GN=TRIM25 PE=1 SV=2	TRIM25	Q14258	8.09	70.928	630	6.19048	3	3	15000000	5	0	0	0	0	0	5	6.62936
U3 small nucleolar ribonucleoprotein protein IMP4 OS=Homo sapiens GN=IMP4 PE=1 SV=1	IMP4	Q96G21	9.47	33.736	291	3.43643	1	1		1	0	0	0	0	0	1	6.62936
WD repeat-containing protein 82 OS=Homo sapiens GN=WDR82 PE=1 SV=1	WDR82	Q6UXN9	7.69	35.056	313	4.47284	1	1	7900000	1	0	0	0	0	0	1	6.62936
60S acidic ribosomal protein P0 OS=Homo sapiens GN=RPLP0 PE=1 SV=1	RPLP0	F8VRK7	9.5	17.43	156	20.5128	2	2	74000000	3	0	0	0	0	0	3	6.62936
Isoform 2 of Serine-threonine kinase receptor-associated protein OS=Homo sapiens GN=STRAP	STRAP	Q9Y3F4-2	5.31	39.753	363	24.2424	7	7	42000000	8	0	0	0	0	0	8	6.62936
Isoform 6 of A-kinase anchor protein 9 OS=Homo sapiens GN=AKAP9	AKAP9	Q99996-6	4.98	455.142	3929	0.610842	2	2	1800000	2	0	0	0	0	0	2	6.62936
Arfaptin-2 OS=Homo sapiens GN=ARFIP2 PE=1 SV=1	ARFIP2	A0A087X1E4	6.38	41.569	374	2.94118	1	1		1	0	0	0	0	0	1	6.62936
DNA topoisomerase 3-beta-1 OS=Homo sapiens GN=TOP3B PE=2 SV=1	TOP3B	O95985	8.12	96.599	862	3.7123	2	2		2	0	0	0	0	0	2	6.62936
Protein CASC3 OS=Homo sapiens GN=CASC3 PE=1 SV=2	CASC3	O15234	6.48	76.232	703	23.3286	16	16	110000000	24	0	0	0	0	0	24	6.62936
Regulator of nonsense transcripts 2 OS=Homo sapiens GN=UPF2 PE=1 SV=1	UPF2	Q9HAU5	5.69	147.717	1272	25.0786	25	25	93000000	29	0	0	0	0	0	29	6.62936
Ubiquitin carboxyl-terminal hydrolase 29 OS=Homo sapiens GN=USP29 PE=2 SV=1	USP29	Q9HBJ7	5.91	104.09	922	2.7115	1	1		1	0	0	0	0	0	1	6.62936
Isoform 4 of Acetyl-CoA carboxylase 1 OS=Homo sapiens GN=ACACA	ACACA	Q13085-4	6.52	269.827	2383	1.72052	3	3	22000000	4	0	0	0	0	0	4	6.62936
26S proteasome non-ATPase regulatory subunit 1 OS=Homo sapiens GN=PSMD1 PE=1 SV=1	PSMD1	A0A087WW66	5.41	105.784	953	2.20357	1	1	23000000	1	0	0	0	0	0	1	6.62936
Isoform 2 of Eukaryotic translation initiation factor 4E OS=Homo sapiens GN=EIF4E	EIF4E	P06730-2	6.42	28.76	248	8.87097	2	2	12000000	2	0	0	0	0	0	2	6.62936
Prefoldin subunit 6 OS=Homo sapiens GN=PFDN6 PE=1 SV=1	PFDN6	O15212	8.88	14.574	129	35.6589	2	2	31000000	5	0	0	0	0	0	5	6.62936
High density lipoprotein binding protein (Vigilin), isoform CRA_a OS=Homo sapiens GN=HDLBP PE=1 SV=1	HDLBP	A0A024R4E5	6.87	141.352	1268	0.709779	1	1	15000000	1	0	0	0	0	0	1	6.62936
DNA replication licensing factor MCM5 OS=Homo sapiens GN=MCM5 PE=1 SV=5	MCM5	P33992	8.37	82.233	734	1.63488	1	1		1	0	0	0	0	0	1	6.62936
Proline-rich protein 36 OS=Homo sapiens GN=PRR36 PE=2 SV=2	PRR36	Q9H6K5	10.48	132.667	1346	14.7103	13	13	170000000	15	0	0	0	0	0	15	6.62936
mRNA-decapping enzyme 1A OS=Homo sapiens GN=DCP1A PE=1 SV=2	DCP1A	Q9NPI6	6.25	63.27	582	15.1203	6	6	12000000	6	0	0	0	0	0	6	6.62936
Isoform 2 of Cell differentiation protein RCD1 homolog OS=Homo sapiens GN=RQCD1	RQCD1	Q92600-2	7.03	36.813	331	11.7825	2	2	17000000	2	0	0	0	0	0	2	6.62936
E3 ubiquitin-protein ligase LRSAM1 OS=Homo sapiens GN=LRSAM1 PE=1 SV=1	LRSAM1	Q6UWE0	5.94	83.541	723	5.25588	1	1		1	0	0	0	0	0	1	6.62936
Eukaryotic translation initiation factor 3 subunit A OS=Homo sapiens GN=EIF3A PE=1 SV=1	EIF3A	Q14152	6.79	166.468	1382	13.314	16	16	97000000	22	0	0	0	0	0	22	6.62936
Protein FAM89B OS=Homo sapiens GN=FAM89B PE=1 SV=2	FAM89B	Q8N5H3	5.34	20.135	189	15.3439	2	2	13000000	2	0	0	0	0	0	2	6.62936
LIM and calponin homology domains-containing protein 1 OS=Homo sapiens GN=LIMCH1 PE=1 SV=4	LIMCH1	Q9UPQ0	6.47	121.792	1083	3.60111	3	3	8900000	3	0	0	0	0	0	3	6.62936
U6 snRNA-associated Sm-like protein LSm1 OS=Homo sapiens GN=LSM1 PE=1 SV=1	LSM1	O15116	5.22	15.17	133	12.0301	1	1	12000000	1	0	0	0	0	0	1	6.62936
HCG1818442, isoform CRA_a OS=Homo sapiens GN=FAM195B PE=1 SV=1	FAM195B	I3L4Q0	9.63	12.943	118	9.32203	1	1		1	0	0	0	0	0	1	6.62936
Methionine--tRNA ligase, cytoplasmic OS=Homo sapiens GN=MARS PE=1 SV=2	MARS	P56192	6.16	101.052	900	1.22222	1	1	6300000	1	0	0	0	0	0	1	6.62936
Neurotrypsin OS=Homo sapiens GN=PRSS12 PE=2 SV=2	PRSS12	P56730	8.03	97.004	875	1.25714	1	1		1	0	0	0	0	0	1	6.62936
Peptidyl-prolyl cis-trans isomerase FKBP4 OS=Homo sapiens GN=FKBP4 PE=1 SV=3	FKBP4	Q02790	5.43	51.772	459	11.1111	5	5	24000000	5	0	0	0	0	0	5	6.62936
Isoform 4 of Heat shock protein 105 kDa OS=Homo sapiens GN=HSPH1	HSPH1	Q92598-4	5.72	97.398	860	8.25581	6	5	29000000	7	0	0	0	0	0	7	6.62936
Isoform 5 of Cancer-associated gene 1 protein OS=Homo sapiens GN=CAGE1	CAGE1	Q8TC20-5	5.67	97.589	839	1.1919	1	1		1	0	0	0	0	0	1	6.62936
BRISC complex subunit Abro1 OS=Homo sapiens GN=FAM175B PE=1 SV=2	FAM175B	Q15018	6.21	46.872	415	2.89157	1	1	4500000	1	0	0	0	0	0	1	6.62936
CTP synthase 2 OS=Homo sapiens GN=CTPS2 PE=1 SV=1	CTPS2	Q9NRF8	6.9	65.636	586	3.41297	2	1	6100000	2	0	0	0	0	0	2	6.62936
Transcriptional activator protein Pur-beta OS=Homo sapiens GN=PURB PE=1 SV=3	PURB	Q96QR8	5.43	33.22	312	3.20513	1	1	60000000	1	0	0	0	0	0	1	6.62936
Vacuolar protein sorting 11 (Yeast), isoform CRA_a OS=Homo sapiens GN=VPS11 PE=1 SV=1	VPS11	A0A087WXL6	7.05	107.74	941	1.59405	1	1		1	0	0	0	0	0	1	6.62936
SEC23-interacting protein OS=Homo sapiens GN=SEC23IP PE=1 SV=1	SEC23IP	Q9Y6Y8	5.54	111.007	1000	19.7	13	13	120000000	20	0	0	0	0	0	20	6.62936
Cleavage stimulation factor subunit 3 OS=Homo sapiens GN=CSTF3 PE=1 SV=1	CSTF3	Q12996	8.12	82.869	717	3.90516	2	2	18000000	2	0	0	0	0	0	2	6.62936
Eukaryotic translation initiation factor 2 subunit 2 OS=Homo sapiens GN=EIF2S2 PE=1 SV=2	EIF2S2	P20042	5.8	38.364	333	2.7027	1	1	5400000	1	0	0	0	0	0	1	6.62936
Eukaryotic translation initiation factor 3 subunit I OS=Homo sapiens GN=EIF3I PE=1 SV=1	EIF3I	Q13347	5.64	36.479	325	26.7692	5	5	37000000	8	0	0	0	0	0	8	6.62936
Adenosylhomocysteinase OS=Homo sapiens GN=AHCY PE=1 SV=4	AHCY	P23526	6.34	47.685	432	5.55556	2	2	5900000	2	0	0	0	0	0	2	6.62936
Isoform 2 of Protein SMG8 OS=Homo sapiens GN=SMG8	SMG8	Q8ND04-2	7.68	113.259	1023	2.93255	2	2	17000000	2	0	0	0	0	0	2	6.62936
TRPM8 channel-associated factor 1 OS=Homo sapiens GN=TCAF1 PE=1 SV=3	TCAF1	Q9Y4C2	6.54	102.061	921	5.21173	3	3	9000000	3	0	0	0	0	0	3	6.62936
T-complex protein 1 subunit epsilon OS=Homo sapiens GN=CCT5 PE=1 SV=1	CCT5	P48643	5.66	59.633	541	32.1627	15	14	82000000	19	0	0	0	0	0	19	6.62936
Isoform 6 of CCR4-NOT transcription complex subunit 10 OS=Homo sapiens GN=CNOT10	CNOT10	Q9H9A5-6	8.21	89.084	804	1.86567	1	1		1	0	0	0	0	0	1	6.62936
Sorcin OS=Homo sapiens GN=SRI PE=1 SV=1	SRI	B4DHQ6	5.24	17.134	158	12.6582	1	1	38000000	2	0	0	0	0	0	2	6.62936
Neurosecretory protein VGF OS=Homo sapiens GN=VGF PE=1 SV=2	VGF	O15240	4.78	67.218	615	4.55285	2	2	4200000	2	0	0	0	0	0	2	6.62936
Serine/threonine-protein kinase 24 OS=Homo sapiens GN=STK24 PE=1 SV=1	STK24	B4DR80	5.58	45.807	412	1.69903	1	1	9500000	1	0	0	0	0	0	1	6.62936
Eukaryotic translation initiation factor 3 subunit C-like protein OS=Homo sapiens GN=EIF3CL PE=3 SV=1	EIF3CL	B5ME19	5.64	105.407	914	14.0044	13	13	68000000	15	0	0	0	0	0	15	6.62936
Roquin-1 OS=Homo sapiens GN=RC3H1 PE=1 SV=1	RC3H1	Q5TC82	7.27	125.658	1133	2.11827	1	1	9600000	1	0	0	0	0	0	1	6.62936
Isoform 3 of Protein transport protein Sec24B OS=Homo sapiens GN=SEC24B	SEC24B	O95487-3	6.57	140.333	1298	18.1048	15	14	58000000	23	0	0	0	0	0	23	6.62936
Trafficking protein particle complex subunit 11 OS=Homo sapiens GN=TRAPPC11 PE=1 SV=2	TRAPPC11	Q7Z392	7.14	128.798	1133	1.1474	1	1	6100000	1	0	0	0	0	0	1	6.62936
Charged multivesicular body protein 2a OS=Homo sapiens GN=CHMP2A PE=1 SV=1	CHMP2A	O43633	5.97	25.088	222	3.15315	1	1		1	0	0	0	0	0	1	6.62936
E3 ubiquitin-protein ligase RING2 OS=Homo sapiens GN=RNF2 PE=1 SV=1	RNF2	Q99496	6.84	37.632	336	3.27381	1	1		1	0	0	0	0	0	1	6.62936
THO complex subunit 6 homolog OS=Homo sapiens GN=THOC6 PE=1 SV=1	THOC6	Q86W42	7.43	37.511	341	4.10557	1	1		1	0	0	0	0	0	1	6.62936
Tetratricopeptide repeat protein 37 OS=Homo sapiens GN=TTC37 PE=1 SV=1	TTC37	Q6PGP7	7.53	175.375	1564	0.511509	1	1	7200000	1	0	0	0	0	0	1	6.62936
Isoform 2 of Zinc finger CCHC domain-containing protein 14 OS=Homo sapiens GN=ZCCHC14	ZCCHC14	Q8WYQ9-2	8.69	101.516	962	1.76715	1	1	2500000	1	0	0	0	0	0	1	6.62936
Peptidyl-prolyl cis-trans isomerase H OS=Homo sapiens GN=PPIH PE=1 SV=1	PPIH	O43447	8.07	19.196	177	5.08475	1	1	6600000	1	0	0	0	0	0	1	6.62936
Isoform 3 of AT-rich interactive domain-containing protein 1B OS=Homo sapiens GN=ARID1B	ARID1B	Q8NFD5-3	6.67	241.31	2289	0.349498	1	1		1	0	0	0	0	0	1	6.62936
DnaJ homolog subfamily A member 2 OS=Homo sapiens GN=DNAJA2 PE=1 SV=1	DNAJA2	O60884	6.48	45.717	412	8.73786	3	3	33000000	4	0	0	0	0	0	4	6.62936
Retrotransposon-like protein 1 OS=Homo sapiens GN=RTL1 PE=2 SV=3	RTL1	A6NKG5	5.21	154.95	1358	23.1959	24	24	88000000	34	0	0	0	0	0	34	6.62936
Isoform 2 of Protein BRICK1 OS=Homo sapiens GN=BRK1	BRK1	Q8WUW1-2	6.76	12.038	106	8.49057	1	1		1	0	0	0	0	0	1	6.62936
Isoform 2 of Protein transport protein Sec24D OS=Homo sapiens GN=SEC24D	SEC24D	O94855-2	7.25	113.007	1033	6.29235	5	5	30000000	5	0	0	0	0	0	5	6.62936
Macrophage migration inhibitory factor OS=Homo sapiens GN=MIF PE=1 SV=4	MIF	P14174	7.88	12.468	115	7.82609	1	1	360000000	1	0	0	0	0	0	1	6.62936
Hsc70-interacting protein OS=Homo sapiens GN=ST13 PE=1 SV=2	ST13	P50502	5.27	41.305	369	6.23306	2	2	18000000	2	0	0	0	0	0	2	6.62936
Isoform 2 of E3 ubiquitin-protein ligase UBR4 OS=Homo sapiens GN=UBR4	UBR4	Q5T4S7-2	6.01	575.592	5204	0.787855	2	2	5000000	4	0	0	0	0	0	4	6.62936
CCR4-NOT transcription complex subunit 3 OS=Homo sapiens GN=CNOT3 PE=1 SV=1	CNOT3	O75175	6.2	81.822	753	2.52324	1	1	12000000	1	0	0	0	0	0	1	6.62936
Ras GTPase-activating protein-binding protein 2 OS=Homo sapiens GN=G3BP2 PE=1 SV=2	G3BP2	Q9UN86	5.55	54.088	482	19.0871	5	5	37000000	11	0	0	0	0	0	11	6.62936
DNA-directed RNA polymerases I, II, and III subunit RPABC1 OS=Homo sapiens GN=POLR2E PE=1 SV=4	POLR2E	P19388	5.95	24.536	210	44.7619	7	7	46000000	8	0	0	0	0	0	8	6.62936
Glycine--tRNA ligase OS=Homo sapiens GN=GARS PE=1 SV=3	GARS	P41250	7.03	83.113	739	3.65359	3	3	5600000	3	0	0	0	0	0	3	6.62936
F-box-like/WD repeat-containing protein TBL1XR1 OS=Homo sapiens GN=TBL1XR1 PE=1 SV=1	TBL1XR1	Q9BZK7	5.55	55.56	514	4.47471	1	1	9100000	2	0	0	0	0	0	2	6.62936
Smoothelin-like protein 2 OS=Homo sapiens GN=SMTNL2 PE=2 SV=1	SMTNL2	Q2TAL5	8.56	50.165	461	1.51844	1	1	200000000	1	0	0	0	0	0	1	6.62936
FAS-associated factor 2 OS=Homo sapiens GN=FAF2 PE=1 SV=2	FAF2	Q96CS3	5.62	52.591	445	2.02247	1	1	2800000	1	0	0	0	0	0	1	6.62936
U2 small nuclear ribonucleoprotein A' OS=Homo sapiens GN=SNRPA1 PE=1 SV=2	SNRPA1	P09661	8.62	28.398	255	5.4902	1	1	68000000	1	0	0	0	0	0	1	6.62936
Multifunctional methyltransferase subunit TRM112-like protein OS=Homo sapiens GN=TRMT112 PE=1 SV=1	TRMT112	F5GX77	8.07	11.964	106	43.3962	4	4	34000000	4	0	0	0	0	0	4	6.62936
Isoform 2 of BTB/POZ domain-containing protein 10 OS=Homo sapiens GN=BTBD10	BTBD10	Q9BSF8-2	7.14	54.372	483	28.7785	12	12	110000000	21	0	0	0	0	0	21	6.62936
Protein VAC14 homolog OS=Homo sapiens GN=VAC14 PE=1 SV=1	VAC14	Q08AM6	6.13	87.917	782	2.8133	2	2	6700000	3	0	0	0	0	0	3	6.62936
TELO2-interacting protein 1 homolog OS=Homo sapiens GN=TTI1 PE=1 SV=3	TTI1	O43156	5.97	121.992	1089	5.60147	4	4	8200000	6	0	0	0	0	0	6	6.62936
RING finger protein 214 OS=Homo sapiens GN=RNF214 PE=1 SV=2	RNF214	Q8ND24	6.95	77.619	703	1.99147	1	1	4100000	1	0	0	0	0	0	1	6.62936
Isoform 2 of Programmed cell death protein 5 OS=Homo sapiens GN=PDCD5	PDCD5	O14737-2	6.93	14.988	129	27.1318	3	3	17000000	3	0	0	0	0	0	3	6.62936
Dopamine beta-hydroxylase OS=Homo sapiens GN=DBH PE=1 SV=3	DBH	P09172	6.42	69.021	617	2.91734	1	1	8000000	3	0	0	0	0	0	3	6.62936
Isoform 6 of SHC-transforming protein 1 OS=Homo sapiens GN=SHC1	SHC1	P29353-6	6.44	62.854	584	9.93151	3	3	14000000	3	0	0	0	0	0	3	6.62936
Valine--tRNA ligase OS=Homo sapiens GN=VARS PE=1 SV=4	VARS	P26640	7.59	140.387	1264	1.50316	2	2	9000000	2	0	0	0	0	0	2	6.62936
C-terminal-binding protein 1 OS=Homo sapiens GN=CTBP1 PE=1 SV=2	CTBP1	Q13363	6.77	47.505	440	2.5	1	1	6700000	1	0	0	0	0	0	1	6.62936
Conserved oligomeric Golgi complex subunit 4 OS=Homo sapiens GN=COG4 PE=1 SV=1	COG4	A0A0A0MS45	5.24	87.128	768	4.03646	3	3	5000000	5	0	0	0	0	0	5	6.62936
Protein FAM167A OS=Homo sapiens GN=FAM167A PE=2 SV=1	FAM167A	Q96KS9	6.32	24.167	214	8.41121	2	2	17000000	2	0	0	0	0	0	2	6.62936
Junctional protein associated with coronary artery disease OS=Homo sapiens GN=KIAA1462 PE=1 SV=3	KIAA1462	Q9P266	7.09	148.26	1359	2.64901	1	1	2700000	1	0	0	0	0	0	1	6.62936
Calponin-3 OS=Homo sapiens GN=CNN3 PE=1 SV=1	CNN3	Q15417	6.05	36.391	329	3.95137	1	1	57000000	1	0	0	0	0	0	1	6.62936
Lys-63-specific deubiquitinase BRCC36 OS=Homo sapiens GN=BRCC3 PE=1 SV=2	BRCC3	P46736	5.92	36.049	316	4.11392	1	1		1	0	0	0	0	0	1	6.62936
Protein ATP5J2-PTCD1 OS=Homo sapiens GN=ATP5J2-PTCD1 PE=4 SV=1	ATP5J2-PTCD1	G3V325	8.72	84.057	749	1.46862	1	1	27000000	1	0	0	0	0	0	1	6.62936
Protein capicua homolog OS=Homo sapiens GN=CIC PE=1 SV=1	CIC	A0A0A0MQR4	8.56	163.577	1606	0.747198	1	1		1	0	0	0	0	0	1	6.62936
Methionine-R-sulfoxide reductase B3 OS=Homo sapiens GN=MSRB3 PE=1 SV=2	MSRB3	Q8IXL7	7.33	20.689	192	4.6875	1	1		1	0	0	0	0	0	1	6.62936
Homer protein homolog 3 OS=Homo sapiens GN=HOMER3 PE=1 SV=2	HOMER3	Q9NSC5	5.45	39.812	361	3.87812	1	1		1	0	0	0	0	0	1	6.62936
Golgin subfamily A member 2 OS=Homo sapiens GN=GOLGA2 PE=1 SV=3	GOLGA2	Q08379	5.02	113.017	1002	38.7226	28	28	150000000	47	0	0	0	0	0	47	6.62936
WD repeat-containing protein 6 OS=Homo sapiens GN=WDR6 PE=1 SV=1	WDR6	Q9NNW5	6.87	121.647	1121	0.802855	1	1	4000000	1	0	0	0	0	0	1	6.62936
Melanoma inhibitory activity protein 3 OS=Homo sapiens GN=MIA3 PE=1 SV=1	MIA3	Q5JRA6	4.84	213.57	1907	15.1023	22	22	100000000	26	0	0	0	0	0	26	6.62936
Isoform 4 of 4F2 cell-surface antigen heavy chain OS=Homo sapiens GN=SLC3A2	SLC3A2	P08195-4	4.97	71.079	661	1.96672	1	1		1	0	0	0	0	0	1	6.62936
Double-stranded RNA-binding protein Staufen homolog 2 OS=Homo sapiens GN=STAU2 PE=1 SV=1	STAU2	A0A0A0MTD1	9.66	51.977	473	10.3594	4	4	7700000	4	0	0	0	0	0	4	6.62936
ADP-ribosylation factor 3 OS=Homo sapiens GN=ARF3 PE=1 SV=2	ARF3	P61204	7.43	20.588	181	24.3094	3	2	7100000	3	0	0	0	0	0	3	6.62936
DDB1- and CUL4-associated factor 7 OS=Homo sapiens GN=DCAF7 PE=1 SV=1	DCAF7	P61962	5.52	38.901	342	7.01754	2	2	15000000	2	0	0	0	0	0	2	6.62936
Eukaryotic translation initiation factor 3 subunit M OS=Homo sapiens GN=EIF3M PE=1 SV=1	EIF3M	Q7L2H7	5.63	42.476	374	9.09091	3	3	14000000	4	0	0	0	0	0	4	6.62936
Nucleoside diphosphate kinase 7 OS=Homo sapiens GN=NME7 PE=1 SV=1	NME7	E9PNU1	8.09	28.87	256	11.3281	2	2	21000000	2	0	0	0	0	0	2	6.62936
Isoform 6 of PDZ and LIM domain protein 5 OS=Homo sapiens GN=PDLIM5	PDLIM5	Q96HC4-6	8.37	67.686	625	1.92	1	1	6400000	1	0	0	0	0	0	1	6.62936
E3 ubiquitin-protein ligase RNF31 OS=Homo sapiens GN=RNF31 PE=1 SV=1	RNF31	Q96EP0	6.57	119.575	1072	1.58582	1	1		2	0	0	0	0	0	2	6.62936
Nuclear migration protein nudC OS=Homo sapiens GN=NUDC PE=1 SV=1	NUDC	Q9Y266	5.38	38.219	331	3.02115	1	1	15000000	1	0	0	0	0	0	1	6.62936
PERQ amino acid-rich with GYF domain-containing protein 2 OS=Homo sapiens GN=GIGYF2 PE=1 SV=1	GIGYF2	Q6Y7W6	5.54	149.978	1299	23.1717	23	21	140000000	29	0	0	0	0	0	29	6.62936
Isoform 7 of Protein PRRC2C OS=Homo sapiens GN=PRRC2C	PRRC2C	Q9Y520-7	9.13	316.888	2898	8.86818	15	15	27000000	22	0	0	0	0	0	22	6.62936
HAUS augmin-like complex subunit 8 OS=Homo sapiens GN=HAUS8 PE=1 SV=3	HAUS8	Q9BT25	7.06	44.83	410	5.85366	1	1		1	0	0	0	0	0	1	6.62936
Cleavage stimulation factor subunit 2 tau variant OS=Homo sapiens GN=CSTF2T PE=1 SV=1	CSTF2T	Q9H0L4	7.25	64.396	616	7.46753	4	1	35000000	5	0	0	0	0	0	5	6.62936
Isoform 3 of Eukaryotic peptide chain release factor GTP-binding subunit ERF3A OS=Homo sapiens GN=GSPT1	GSPT1	P15170-3	5.33	68.656	637	3.76766	1	1	29000000	3	0	0	0	0	0	3	6.62936
Protein FAM98A OS=Homo sapiens GN=FAM98A PE=1 SV=1	FAM98A	E9PH82	8.28	34.409	312	9.29487	2	2	24000000	5	0	0	0	0	0	5	6.62936
Dihydropyrimidinase-related protein 5 OS=Homo sapiens GN=DPYSL5 PE=1 SV=1	DPYSL5	Q9BPU6	7.2	61.382	564	10.9929	3	3	16000000	5	0	0	0	0	0	5	6.62936
Nucleolysin TIA-1 isoform p40 OS=Homo sapiens GN=TIA1 PE=1 SV=3	TIA1	P31483	7.74	42.936	386	7.77202	3	3	21000000	3	0	0	0	0	0	3	6.62936
Vacuolar protein sorting-associated protein 37B OS=Homo sapiens GN=VPS37B PE=1 SV=1	VPS37B	Q9H9H4	7.34	31.287	285	3.85965	1	1		1	0	0	0	0	0	1	6.62936
ATP-binding cassette sub-family D member 3 OS=Homo sapiens GN=ABCD3 PE=1 SV=1	ABCD3	P28288	9.36	75.428	659	2.12443	1	1		1	0	0	0	0	0	1	6.62936
Dynactin subunit 1 OS=Homo sapiens GN=DCTN1 PE=1 SV=3	DCTN1	Q14203	5.81	141.607	1278	2.58216	2	2	13000000	3	0	0	0	0	0	3	6.62936
Isoform 4 of DNA-directed RNA polymerases I, II, and III subunit RPABC3 OS=Homo sapiens GN=POLR2H	POLR2H	P52434-4	4.67	19.755	175	7.42857	1	1	10000000	1	0	0	0	0	0	1	6.62936
Replication factor C subunit 4 OS=Homo sapiens GN=RFC4 PE=1 SV=2	RFC4	P35249	8.02	39.657	363	2.75482	1	1	17000000	1	0	0	0	0	0	1	6.62936
Protein PRRC2A OS=Homo sapiens GN=PRRC2A PE=1 SV=3	PRRC2A	P48634	9.45	228.724	2157	6.62958	8	8	13000000	9	0	0	0	0	0	9	6.62936
BTB/POZ domain-containing protein KCTD20 OS=Homo sapiens GN=KCTD20 PE=1 SV=1	KCTD20	Q7Z5Y7	5.33	47.45	419	54.8926	16	16	210000000	44	0	0	0	0	0	44	6.62936
Negative elongation factor A OS=Homo sapiens GN=NELFA PE=4 SV=1	NELFA	A0A0C4DFX9	9.26	58.462	539	2.5974	1	1	17000000	1	0	0	0	0	0	1	6.62936
SWI/SNF-related matrix-associated actin-dependent regulator of chromatin subfamily D member 2 OS=Homo sapiens GN=SMARCD2 PE=1 SV=3	SMARCD2	Q92925	9.64	58.884	531	7.34463	2	1	8000000	3	0	0	0	0	0	3	6.62936
Isoform 2 of Lysine-specific histone demethylase 1A OS=Homo sapiens GN=KDM1A	KDM1A	O60341-2	6.25	95.096	876	3.42466	2	2	19000000	3	0	0	0	0	0	3	6.62936
Isoform F of Constitutive coactivator of PPAR-gamma-like protein 1 OS=Homo sapiens GN=FAM120A	FAM120A	Q9NZB2-6	9	125.192	1146	8.90052	7	7	17000000	7	0	0	0	0	0	7	6.62936
NEDD8 OS=Homo sapiens GN=NEDD8 PE=1 SV=1	NEDD8	Q15843	8.43	9.066	81	17.284	1	1	4300000	1	0	0	0	0	0	1	6.62936
Cyclin-dependent-like kinase 5 OS=Homo sapiens GN=CDK5 PE=1 SV=3	CDK5	Q00535	7.66	33.283	292	6.50685	2	2	11000000	3	0	0	0	0	0	3	6.62936
Prefoldin subunit 3 OS=Homo sapiens GN=VBP1 PE=1 SV=3	VBP1	P61758	7.11	22.643	197	41.6244	7	7	49000000	7	0	0	0	0	0	7	6.62936
BAG family molecular chaperone regulator 2 OS=Homo sapiens GN=BAG2 PE=1 SV=1	BAG2	O95816	6.7	23.757	211	14.218	3	3	26000000	3	0	0	0	0	0	3	6.62936
Transportin-3 OS=Homo sapiens GN=TNPO3 PE=1 SV=1	TNPO3	C9J7E5	5.71	107.978	957	11.3898	7	7	12000000	14	0	0	0	0	0	14	6.62936
Isoform 3 of Protein scribble homolog OS=Homo sapiens GN=SCRIB	SCRIB	Q14160-3	5.11	177.586	1655	2.29607	2	2		2	0	0	0	0	0	2	6.62936
Hypoxanthine-guanine phosphoribosyltransferase OS=Homo sapiens GN=HPRT1 PE=1 SV=2	HPRT1	P00492	6.68	24.564	218	5.9633	1	1		1	0	0	0	0	0	1	6.62936
Isoform 2 of Protein FAM98B OS=Homo sapiens GN=FAM98B	FAM98B	Q52LJ0-2	8.69	45.519	433	5.77367	2	2	6800000	2	0	0	0	0	0	2	6.62936
Tumor susceptibility gene 101 protein OS=Homo sapiens GN=TSG101 PE=1 SV=2	TSG101	Q99816	6.46	43.916	390	7.4359	3	3	24000000	3	0	0	0	0	0	3	6.62936
Proteasome subunit alpha type OS=Homo sapiens GN=PSMA6 PE=1 SV=1	PSMA6	G3V3I1	8.63	16.634	148	8.78378	1	1	6300000	1	0	0	0	0	0	1	6.62936
Myristoylated alanine-rich C-kinase substrate OS=Homo sapiens GN=MARCKS PE=1 SV=4	MARCKS	P29966	4.45	31.536	332	15.0602	2	2	8900000	2	0	0	0	0	0	2	6.62936
Isoform 2 of TBC1 domain family member 5 OS=Homo sapiens GN=TBC1D5	TBC1D5	Q92609-2	6.33	91.159	817	2.20318	1	1	4100000	3	0	0	0	0	0	3	6.62936
Nucleoporin Nup43 OS=Homo sapiens GN=NUP43 PE=1 SV=1	NUP43	Q8NFH3	5.63	42.124	380	3.68421	1	1		1	0	0	0	0	0	1	6.62936
Ketosamine-3-kinase OS=Homo sapiens GN=FN3KRP PE=1 SV=2	FN3KRP	Q9HA64	7.33	34.39	309	3.8835	1	1	5700000	1	0	0	0	0	0	1	6.62936
Protein transport protein Sec23B OS=Homo sapiens GN=SEC23B PE=1 SV=2	SEC23B	Q15437	6.89	86.424	767	56.9752	28	26	300000000	62	0	0	0	0	0	62	6.62936
Isoform 3 of Protein NEDD1 OS=Homo sapiens GN=NEDD1	NEDD1	Q8NHV4-3	7.97	72.665	667	27.5862	11	11	69000000	22	0	0	0	0	0	22	6.62936
Annexin A7 OS=Homo sapiens GN=ANXA7 PE=1 SV=3	ANXA7	P20073	5.68	52.706	488	1.63934	1	1		1	0	0	0	0	0	1	6.62936
WD repeat-containing protein 61 OS=Homo sapiens GN=WDR61 PE=1 SV=1	WDR61	H0YMF9	5.38	20.731	189	25.9259	2	2		2	0	0	0	0	0	2	6.62936
Nuclear pore complex protein Nup107 OS=Homo sapiens GN=NUP107 PE=1 SV=1	NUP107	P57740	5.43	106.307	925	0.756757	1	1	3300000	1	0	0	0	0	0	1	6.62936
Protein S100-A6 OS=Homo sapiens GN=S100A6 PE=1 SV=1	S100A6	P06703	5.48	10.173	90	27.7778	1	1	5400000	1	0	0	0	0	0	1	6.62936
Leucine-rich repeat-containing protein 47 OS=Homo sapiens GN=LRRC47 PE=1 SV=1	LRRC47	Q8N1G4	8.28	63.434	583	8.4048	3	3	5400000	3	0	0	0	0	0	3	6.62936
Protein transport protein Sec31A OS=Homo sapiens GN=SEC31A PE=1 SV=1	SEC31A	D6RHZ5	6.38	96.443	877	37.7423	25	25	190000000	46	0	0	0	0	0	46	6.62936
ATP-dependent RNA helicase DHX36 OS=Homo sapiens GN=DHX36 PE=1 SV=2	DHX36	Q9H2U1	7.68	114.688	1008	3.86905	3	3	10000000	3	0	0	0	0	0	3	6.62936
Protein phosphatase 1G OS=Homo sapiens GN=PPM1G PE=1 SV=1	PPM1G	O15355	4.36	59.235	546	7.69231	2	2	3300000	2	0	0	0	0	0	2	6.62936
Protein AHNAK2 OS=Homo sapiens GN=AHNAK2 PE=1 SV=2	AHNAK2	Q8IVF2	5.36	616.242	5795	32.8732	74	74	480000000	106	0	0	0	0	0	106	6.62936
CAD protein OS=Homo sapiens GN=CAD PE=1 SV=3	CAD	P27708	6.46	242.829	2225	26.4719	36	36	84000000	45	0	0	0	0	0	45	6.62936
Vacuolar protein sorting-associated protein 35 OS=Homo sapiens GN=VPS35 PE=1 SV=2	VPS35	Q96QK1	5.49	91.649	796	12.5628	8	8	49000000	13	0	0	0	0	0	13	6.62936
MICOS complex subunit MIC60 OS=Homo sapiens GN=IMMT PE=1 SV=1	IMMT	Q16891	6.48	83.626	758	2.5066	1	1	8500000	1	0	0	0	0	0	1	6.62936
RNA-binding protein 28 OS=Homo sapiens GN=RBM28 PE=1 SV=3	RBM28	Q9NW13	9.22	85.685	759	2.89855	2	2		2	0	0	0	0	0	2	6.62936
Isoform 2 of Serine/threonine-protein phosphatase 2A 55 kDa regulatory subunit B alpha isoform OS=Homo sapiens GN=PPP2R2A	PPP2R2A	P63151-2	6.49	52.966	457	8.09628	3	3	15000000	3	0	0	0	0	0	3	6.62936
RUN and FYVE domain-containing protein 1 OS=Homo sapiens GN=RUFY1 PE=1 SV=2	RUFY1	Q96T51	5.74	79.767	708	4.37853	2	2	2500000	4	0	0	0	0	0	4	6.62936
Isocitrate dehydrogenase [NAD] subunit gamma, mitochondrial OS=Homo sapiens GN=IDH3G PE=1 SV=1	IDH3G	P51553	8.5	42.767	393	5.08906	1	1		1	0	0	0	0	0	1	6.62936
Isoform 2 of Tubulin-specific chaperone A OS=Homo sapiens GN=TBCA	TBCA	O75347-2	9.35	15.781	129	6.97674	1	1	6400000	1	0	0	0	0	0	1	6.62936
Isoform 2 of Actin-related protein 2/3 complex subunit 5 OS=Homo sapiens GN=ARPC5	ARPC5	O15511-2	6.02	16.62	154	20.1299	2	2	32000000	3	0	0	0	0	0	3	6.62936
Ensconsin OS=Homo sapiens GN=MAP7 PE=1 SV=1	MAP7	A0A087WZ40	9.77	87.766	779	1.02696	1	1	14000000	1	0	0	0	0	0	1	6.62936
Small nuclear ribonucleoprotein G OS=Homo sapiens GN=SNRPG PE=1 SV=1	SNRPG	P62308	8.88	8.49	76	9.21053	1	1	28000000	2	0	0	0	0	0	2	6.62936
Actin-like protein 6A OS=Homo sapiens GN=ACTL6A PE=1 SV=1	ACTL6A	O96019	5.6	47.43	429	10.4895	3	3	14000000	3	0	0	0	0	0	3	6.62936
PDZ and LIM domain protein 4 OS=Homo sapiens GN=PDLIM4 PE=1 SV=2	PDLIM4	P50479	7.91	35.376	330	2.72727	1	1		1	0	0	0	0	0	1	6.62936
C-1-tetrahydrofolate synthase, cytoplasmic OS=Homo sapiens GN=MTHFD1 PE=1 SV=1	MTHFD1	F5H2F4	8.43	110.544	1020	6.37255	5	5	10000000	5	0	0	0	0	0	5	6.62936
60 kDa SS-A/Ro ribonucleoprotein OS=Homo sapiens GN=TROVE2 PE=1 SV=2	TROVE2	P10155	8.03	60.631	538	2.04461	1	1	4700000	1	0	0	0	0	0	1	6.62936
Isoform 2 of General vesicular transport factor p115 OS=Homo sapiens GN=USO1	USO1	O60763-2	4.89	109.127	973	45.5293	32	32	520000000	90	2.0555	1	1	14000000	1	91	6.49185
Isoform 3 of Protein SEC13 homolog OS=Homo sapiens GN=SEC13	SEC13	P55735-3	5.85	40.721	368	50.2717	15	15	980000000	72	4.61957	1	1	8300000	1	73	6.16993
Microtubule-associated protein 1B OS=Homo sapiens GN=MAP1B PE=1 SV=2	MAP1B	P46821	4.81	270.468	2468	16.2885	29	29	86000000	40	0.405186	1	1	8900000	1	41	5.32193
Insulin-like growth factor 2 mRNA-binding protein 3 OS=Homo sapiens GN=IGF2BP3 PE=1 SV=2	IGF2BP3	O00425	8.87	63.666	579	45.9413	21	21	180000000	40	2.41796	1	1		1	41	5.32193
Neuroblast differentiation-associated protein AHNAK OS=Homo sapiens GN=AHNAK PE=1 SV=2	AHNAK	Q09666	6.15	628.699	5890	56.8761	167	167	510000000	278	5.26316	6	6	25000000	7	285	5.31159
EMILIN-1 OS=Homo sapiens GN=EMILIN1 PE=4 SV=1	EMILIN1	A0A0C4DFX3	5.17	106.629	1016	18.2087	13	13	130000000	24	1.47638	1	1	1300000	1	25	4.58496
UDP-N-acetylglucosamine--peptide N-acetylglucosaminyltransferase 110 kDa subunit OS=Homo sapiens GN=OGT PE=1 SV=3	OGT	O15294	6.7	116.85	1046	20.6501	15	15	62000000	24	1.33843	1	1	1800000	1	25	4.58496
Serine/threonine-protein phosphatase 2A 65 kDa regulatory subunit A alpha isoform OS=Homo sapiens GN=PPP2R1A PE=1 SV=4	PPP2R1A	P30153	5.11	65.267	589	36.5025	16	16	35000000	20	1.69779	1	1	3200000	1	21	4.32193
Nuclease-sensitive element-binding protein 1 (Fragment) OS=Homo sapiens GN=YBX1 PE=1 SV=1	YBX1	C9J5V9	10.26	23.584	216	31.0185	5	4	320000000	15	13.8889	1	1	14000000	1	16	3.90689
Isoform 2 of Stress-induced-phosphoprotein 1 OS=Homo sapiens GN=STIP1	STIP1	P31948-2	7.74	68.037	590	24.9153	14	14	61000000	15	2.37288	1	1	4100000	1	16	3.90689
T-complex protein 1 subunit eta OS=Homo sapiens GN=CCT7 PE=1 SV=2	CCT7	Q99832	7.65	59.329	543	47.8821	20	20	98000000	29	3.49908	2	2	10000000	2	31	3.85798
ATP-citrate synthase OS=Homo sapiens GN=ACLY PE=1 SV=3	ACLY	P53396	7.33	120.762	1101	14.0781	11	11	30000000	14	0.635786	1	1	1200000	1	15	3.80735
Polyadenylate-binding protein 1 OS=Homo sapiens GN=PABPC1 PE=1 SV=2	PABPC1	P11940	9.5	70.626	636	39.3082	25	17	560000000	39	5.18868	3	3		3	42	3.70044
Dihydropyrimidinase-related protein 2 OS=Homo sapiens GN=DPYSL2 PE=1 SV=1	DPYSL2	Q16555	6.38	62.255	572	39.1608	13	10	110000000	25	6.11888	2	2	8100000	2	27	3.64386
DnaJ homolog subfamily A member 1 OS=Homo sapiens GN=DNAJA1 PE=1 SV=2	DNAJA1	P31689	7.08	44.839	397	29.9748	8	8	57000000	12	2.51889	1	1		1	13	3.58496
Cytoplasmic dynein 1 heavy chain 1 OS=Homo sapiens GN=DYNC1H1 PE=1 SV=5	DYNC1H1	Q14204	6.4	532.072	4646	13.3448	44	44	220000000	58	1.42058	3	3	9400000	5	63	3.53605
Far upstream element-binding protein 3 OS=Homo sapiens GN=FUBP3 PE=1 SV=2	FUBP3	Q96I24	8.38	61.602	572	37.9371	16	13	71000000	22	1.57343	2	0	41000000	2	24	3.45943
Y-box-binding protein 3 OS=Homo sapiens GN=YBX3 PE=1 SV=4	YBX3	P16989	9.77	40.066	372	6.45161	3	1	120000000	10	5.10753	1	1	62000000	1	11	3.32193
Isoform LCRMP-1 of Dihydropyrimidinase-related protein 1 OS=Homo sapiens GN=CRMP1	CRMP1	Q14194-2	6.86	74.216	686	8.74636	5	2	85000000	10	1.02041	1	1	20000000	1	11	3.32193
Isoform 4 of Four and a half LIM domains protein 1 OS=Homo sapiens GN=FHL1	FHL1	Q13642-4	8.32	34.973	309	19.4175	6	6	26000000	10	3.8835	1	1	14000000	1	11	3.32193
Septin-6 OS=Homo sapiens GN=SEPT6 PE=1 SV=4	SEPT6	Q14141	6.67	49.685	434	17.2811	5	4	83000000	10	2.07373	1	1	36000000	1	11	3.32193
Fatty acid synthase OS=Homo sapiens GN=FASN PE=1 SV=3	FASN	P49327	6.44	273.254	2511	20.1513	30	30	89000000	38	2.38949	3	3	22000000	4	42	3.24793
Nuclease-sensitive element-binding protein 1 OS=Homo sapiens GN=YBX1 PE=1 SV=3	YBX1	P67809	9.88	35.903	324	43.5185	14	12	490000000	38	22.5309	3	3	17000000	4	42	3.24793
Kinesin-1 heavy chain OS=Homo sapiens GN=KIF5B PE=1 SV=1	KIF5B	P33176	6.51	109.617	963	10.1765	8	4	40000000	9	1.34995	1	1	6200000	1	10	3.16993
Importin subunit alpha-7 OS=Homo sapiens GN=KPNA6 PE=1 SV=1	KPNA6	O60684	4.98	59.991	536	16.2313	6	6	45000000	9	2.61194	1	1	8400000	1	10	3.16993
UPF0568 protein C14orf166 OS=Homo sapiens GN=C14orf166 PE=1 SV=1	C14orf166	G3V4C6	6.9	22.689	193	33.6788	5	5	58000000	9	8.29016	1	1	10000000	1	10	3.16993
T-complex protein 1 subunit delta OS=Homo sapiens GN=CCT4 PE=1 SV=4	CCT4	P50991	7.83	57.888	539	41.5584	18	17	140000000	26	6.86456	3	3	13000000	3	29	3.11548
Putative RNA-binding protein Luc7-like 1 OS=Homo sapiens GN=LUC7L PE=1 SV=1	LUC7L	F8WBC1	11.9	4.554	42	19.407	6	2	120000000	8	26.1905	1	1	7500000	1	9	3
Kinesin heavy chain isoform 5C OS=Homo sapiens GN=KIF5C PE=1 SV=1	KIF5C	O60282	6.19	109.427	957	8.77743	7	3	40000000	8	1.35841	1	1	6200000	1	9	3
YTH domain-containing family protein 3 OS=Homo sapiens GN=YTHDF3 PE=1 SV=1	YTHDF3	A0A087X0Q1	9.04	63.636	583	15.0943	7	5	53000000	8	1.54374	1	1	1700000	1	9	3
Isoform 2 of Eukaryotic translation initiation factor 3 subunit B OS=Homo sapiens GN=EIF3B	EIF3B	P55884-2	5.08	98.967	873	10.9966	7	7	47000000	8	1.60367	1	1		1	9	3
Isoform LCRMP-4 of Dihydropyrimidinase-related protein 3 OS=Homo sapiens GN=DPYSL3	DPYSL3	Q14195-2	6.35	73.865	684	49.1228	22	19	160000000	38	9.35673	5	5	14000000	5	43	2.926
T-complex protein 1 subunit beta OS=Homo sapiens GN=CCT2 PE=1 SV=4	CCT2	P78371	6.46	57.452	535	65.7944	25	25	120000000	38	12.7103	5	5	7100000	5	43	2.926
Protein mago nashi homolog OS=Homo sapiens GN=MAGOH PE=1 SV=1	MAGOH	P61326	6.11	17.153	146	67.8082	8	8	160000000	15	18.4932	2	2	9700000	2	17	2.90689
Transportin-1 OS=Homo sapiens GN=TNPO1 PE=1 SV=2	TNPO1	Q92973	4.98	102.289	898	18.5969	12	9	71000000	15	2.56125	2	2	12000000	2	17	2.90689
Isoform 3 of Polyadenylate-binding protein 4 OS=Homo sapiens GN=PABPC4	PABPC4	Q13310-3	9.35	72.345	660	21.9697	14	6	300000000	22	5	3	3		3	25	2.87447
ATP-dependent RNA helicase DDX1 OS=Homo sapiens GN=DDX1 PE=1 SV=2	DDX1	Q92499	7.23	82.38	740	32.027	15	15	95000000	22	9.18919	3	3	15000000	3	25	2.87447
Protein mago nashi homolog 2 OS=Homo sapiens GN=MAGOHB PE=1 SV=1	MAGOHB	Q96A72	6.39	17.265	148	61.4865	7	7	160000000	14	18.2432	2	2	9700000	2	16	2.80735
F-actin-capping protein subunit alpha-1 OS=Homo sapiens GN=CAPZA1 PE=1 SV=3	CAPZA1	P52907	5.69	32.902	286	17.8322	4	4	40000000	7	6.29371	1	1	17000000	1	8	2.80735
Kinesin heavy chain isoform 5A OS=Homo sapiens GN=KIF5A PE=1 SV=2	KIF5A	Q12840	5.9	117.306	1032	7.07364	6	2	40000000	7	1.25969	1	1	6200000	1	8	2.80735
Isoform 2 of Putative ATP-dependent RNA helicase DHX30 OS=Homo sapiens GN=DHX30	DHX30	Q7L2E3-2	8.6	136.03	1222	7.03764	7	7	45000000	7	0.818331	1	0	84000000	1	8	2.80735
YTH domain-containing family protein 2 OS=Homo sapiens GN=YTHDF2 PE=1 SV=2	YTHDF2	Q9Y5A9	8.79	62.296	579	10.19	6	4	39000000	7	1.5544	1	1	1700000	1	8	2.80735
Isoform 2 of Septin-2 OS=Homo sapiens GN=SEPT2	9/2/2015	Q15019-2	6.89	45.432	396	29.5455	7	7	23000000	13	8.83838	2	2		2	15	2.70044
SWI/SNF complex subunit SMARCC1 OS=Homo sapiens GN=SMARCC1 PE=1 SV=3	SMARCC1	Q92922	5.76	122.79	1105	8.95928	8	4	23000000	12	2.17195	2	1	12000000	2	14	2.58496
RNA-binding protein 8A OS=Homo sapiens GN=RBM8A PE=1 SV=1	RBM8A	Q9Y5S9	5.72	19.877	174	39.0805	5	2	130000000	6	6.32184	1	1	17000000	1	7	2.58496
Isoform 2 of Nucleosome assembly protein 1-like 4 OS=Homo sapiens GN=NAP1L4	NAP1L4	Q99733-2	4.7	44.051	386	17.6166	6	5	15000000	6	2.84974	1	1	3400000	1	7	2.58496
Coatomer subunit beta' OS=Homo sapiens GN=COPB2 PE=1 SV=2	COPB2	P35606	5.27	102.422	906	7.17439	5	5	12000000	6	1.10375	1	1	3100000	1	7	2.58496
Isoform Non-brain of Clathrin light chain A OS=Homo sapiens GN=CLTA	CLTA	P09496-2	4.53	23.647	218	16.9725	3	3	160000000	6	9.63303	1	1		1	7	2.58496
Nestin OS=Homo sapiens GN=NES PE=1 SV=2	NES	P48681	4.36	177.332	1621	41.3942	54	54	330000000	103	12.0296	15	15	30000000	18	121	2.51658
T-complex protein 1 subunit gamma OS=Homo sapiens GN=CCT3 PE=1 SV=4	CCT3	P49368	6.49	60.495	545	41.6514	18	18	260000000	28	13.0275	5	5	39000000	5	33	2.48543
Serine/threonine-protein phosphatase 2A catalytic subunit alpha isoform OS=Homo sapiens GN=PPP2CA PE=1 SV=1	PPP2CA	P67775	5.54	35.571	309	38.1877	7	1	62000000	11	8.09061	2	2	17000000	2	13	2.45943
SWI/SNF complex subunit SMARCC2 OS=Homo sapiens GN=SMARCC2 PE=1 SV=1	SMARCC2	F8VXC8	5.71	136.1	1245	7.38956	8	4	28000000	11	1.76707	2	1	17000000	2	13	2.45943
T-complex protein 1 subunit theta OS=Homo sapiens GN=CCT8 PE=1 SV=4	CCT8	P50990	5.6	59.583	548	45.438	22	22	1800000000	26	12.5912	5	5	12000000	5	31	2.37851
Mannosyl-oligosaccharide glucosidase OS=Homo sapiens GN=MOGS PE=1 SV=5	MOGS	Q13724	8.9	91.861	837	8.72162	4	4	6800000	5	1.43369	1	1	11000000	1	6	2.32193
Isoform 2 of AP-2 complex subunit alpha-2 OS=Homo sapiens GN=AP2A2	AP2A2	O94973-2	6.86	104.024	940	5.53191	3	3		5	1.06383	1	1	8900000	1	6	2.32193
Centrosomal protein of 170 kDa OS=Homo sapiens GN=CEP170 PE=1 SV=1	CEP170	Q5SW79	7.11	175.187	1584	20.8191	4	4	35000000	5	0.883838	1	1		1	6	2.32193
Coatomer subunit alpha OS=Homo sapiens GN=COPA PE=1 SV=2	COPA	P53621	7.66	138.258	1224	5.06536	5	5	15000000	5	0.653595	1	1		1	6	2.32193
Isoform 2 of Acetyl-CoA acetyltransferase, cytosolic OS=Homo sapiens GN=ACAT2	ACAT2	Q9BWD1-2	8.46	44.614	426	11.9718	4	4	20000000	5	2.58216	1	1	10000000	1	6	2.32193
40S ribosomal protein S15 OS=Homo sapiens GN=RPS15 PE=1 SV=1	RPS15	S4R417	11.03	15.57	135	38.5185	3	3	38000000	5	20	1	1	12000000	1	6	2.32193
Isoform 2 of RNA-binding protein 8A OS=Homo sapiens GN=RBM8A	RBM8A	Q9Y5S9-2	5.92	19.748	173	38.7283	4	1	110000000	5	6.35838	1	1	17000000	1	6	2.32193
ATP-dependent RNA helicase DDX3X OS=Homo sapiens GN=DDX3X PE=1 SV=3	DDX3X	O00571	7.18	73.198	662	43.9577	23	23	250000000	38	13.2931	7	7	38000000	8	46	2.24793
Glutamine synthetase OS=Homo sapiens GN=GLUL PE=1 SV=4	GLUL	P15104	6.89	42.037	373	54.4236	16	16	330000000	33	25.4692	5	5	27000000	7	40	2.23704
tRNA-splicing ligase RtcB homolog OS=Homo sapiens GN=RTCB PE=1 SV=1	RTCB	Q9Y3I0	7.23	55.175	505	34.6535	12	12	74000000	14	6.33663	3	3	12000000	3	17	2.22239
RuvB-like 1 OS=Homo sapiens GN=RUVBL1 PE=1 SV=1	RUVBL1	Q9Y265	6.42	50.196	456	68.4211	22	22	730000000	56	33.3333	11	11	69000000	12	68	2.22239
Importin subunit beta-1 OS=Homo sapiens GN=KPNB1 PE=1 SV=2	KPNB1	Q14974	4.78	97.108	876	32.9909	18	18	250000000	32	11.5297	7	7	39000000	7	39	2.19265
Staphylococcal nuclease domain-containing protein 1 OS=Homo sapiens GN=SND1 PE=1 SV=1	SND1	Q7KZF4	7.17	101.934	910	12.5275	8	8	20000000	9	2.74725	2	2	2800000	2	11	2.16993
LanC-like protein 1 OS=Homo sapiens GN=LANCL1 PE=1 SV=1	LANCL1	O43813	7.75	45.254	399	19.2982	6	6	94000000	9	5.01253	2	2	6100000	2	11	2.16993
Septin-7 OS=Homo sapiens GN=SEPT7 PE=1 SV=2	SEPT7	E7EPK1	8.63	50.663	437	33.4096	10	9	100000000	17	12.1281	4	4	19000000	4	21	2.08746
RuvB-like 2 OS=Homo sapiens GN=RUVBL2 PE=1 SV=3	RUVBL2	Q9Y230	5.64	51.125	463	52.6998	24	24	480000000	41	27.4298	10	10	33000000	10	51	2.03562
Alpha-internexin OS=Homo sapiens GN=INA PE=1 SV=2	INA	Q16352	5.4	55.357	499	59.7194	27	24	910000000	45	21.6433	10	8	130000000	11	56	2.03242
D-3-phosphoglycerate dehydrogenase OS=Homo sapiens GN=PHGDH PE=1 SV=4	PHGDH	O43175	6.71	56.614	533	5.06567	2	2	6600000	4	1.87617	1	1		1	5	2
Splicing factor 3A subunit 1 OS=Homo sapiens GN=SF3A1 PE=1 SV=1	SF3A1	Q15459	5.22	88.831	793	8.32282	4	4	7700000	12	3.7831	2	2	7500000	3	15	2
3-hydroxyacyl-CoA dehydrogenase type-2 OS=Homo sapiens GN=HSD17B10 PE=1 SV=3	HSD17B10	Q99714	7.78	26.906	261	24.9042	4	4	22000000	4	6.51341	1	1	8800000	1	5	2
Heat shock 70 kDa protein 4 OS=Homo sapiens GN=HSPA4 PE=1 SV=4	HSPA4	P34932	5.19	94.271	840	7.5	4	3	44000000	4	1.66667	1	1		1	5	2
Alpha-centractin OS=Homo sapiens GN=ACTR1A PE=1 SV=1	ACTR1A	R4GMT0	5.66	37.41	332	23.7952	4	4	34000000	4	3.01205	1	1	17000000	1	5	2
Cullin-associated NEDD8-dissociated protein 1 OS=Homo sapiens GN=CAND1 PE=1 SV=2	CAND1	Q86VP6	5.78	136.289	1230	4.95935	4	4	11000000	4	1.05691	1	1	3100000	1	5	2
Aspartate--tRNA ligase, cytoplasmic OS=Homo sapiens GN=DARS PE=1 SV=2	DARS	P14868	6.55	57.1	501	7.98403	4	4	9700000	4	1.59681	1	1		1	5	2
60S ribosomal protein L27 (Fragment) OS=Homo sapiens GN=RPL27 PE=1 SV=1	RPL27	K7ELC7	10.58	16.459	144	13.8889	2	2	36000000	4	6.25	1	1	24000000	1	5	2
Uncharacterized protein (Fragment) OS=Homo sapiens PE=4 SV=2	NOGENE	V9GYP5	9.31	23.775	217	13.5021	3	3	110000000	4	9.21659	1	1		1	5	2
Four and a half LIM domains protein 1 OS=Homo sapiens GN=FHL1 PE=1 SV=4	FHL1	Q13642	8.97	36.239	323	13.6223	4	4	23000000	4	3.71517	1	1	14000000	1	5	2
Cysteine-rich protein 2 OS=Homo sapiens GN=CRIP2 PE=1 SV=1	CRIP2	P52943	8.72	22.478	208	20.1923	3	3	63000000	4	7.69231	1	1	59000000	1	5	2
Transportin-2 OS=Homo sapiens GN=TNPO2 PE=1 SV=3	TNPO2	O14787	5.01	101.322	897	4.12486	4	1	43000000	4	1.33779	1	1	14000000	1	5	2
DNA-directed RNA polymerase II subunit RPB2 OS=Homo sapiens GN=POLR2B PE=1 SV=1	POLR2B	P30876	6.87	133.811	1174	4.8552	4	4	10000000	4	0.936968	1	1	2900000	1	5	2
Peptidyl-prolyl cis-trans isomerase G OS=Homo sapiens GN=PPIG PE=1 SV=2	PPIG	Q13427	10.29	88.564	754	4.64191	4	4	5000000	4	1.85676	1	1	7400000	1	5	2
Importin subunit alpha-5 OS=Homo sapiens GN=KPNA1 PE=1 SV=3	KPNA1	P52294	5.01	60.184	538	4.64684	2	2	55000000	4	2.60223	1	1	8400000	1	5	2
60S ribosomal protein L28 OS=Homo sapiens GN=RPL28 PE=1 SV=1	RPL28	H0YLP6	10.36	9.651	89	26.9663	3	3	33000000	4	12.3596	1	1	29000000	1	5	2
Isoform 2 of Coatomer subunit alpha OS=Homo sapiens GN=COPA	COPA	P53621-2	7.59	139.235	1233	4.37956	4	4	14000000	4	0.648824	1	1		1	5	2
40S ribosomal protein S8 OS=Homo sapiens GN=RPS8 PE=1 SV=2	RPS8	P62241	10.32	24.19	208	40.8654	7	7	120000000	12	18.2692	3	3	29000000	3	15	2
Peroxiredoxin-6 OS=Homo sapiens GN=PRDX6 PE=1 SV=3	PRDX6	P30041	6.38	25.019	224	18.75	3	3	14000000	4	5.35714	1	1	15000000	1	5	2
Plectin OS=Homo sapiens GN=PLEC PE=1 SV=3	PLEC	Q15149	5.96	531.466	4684	30.7216	117	117	300000000	149	10.3117	36	34	140000000	40	189	1.89724
Septin-9 OS=Homo sapiens GN=SEPT9 PE=1 SV=2	SEPT9	Q9UHD8	8.97	65.361	586	36.3481	15	15	58000000	18	11.0922	5	5	7500000	5	23	1.848
Isoform 4 of Polypyrimidine tract-binding protein 3 OS=Homo sapiens GN=PTBP3	PTBP3	O95758-4	9.19	60.379	558	11.6487	4	2	58000000	7	3.22581	2	1	54000000	2	9	1.80735
Exportin-1 OS=Homo sapiens GN=XPO1 PE=1 SV=1	XPO1	O14980	6.06	123.306	1071	7.0028	5	5	34000000	7	3.1746	2	2	17000000	2	9	1.80735
Delta-1-pyrroline-5-carboxylate synthase OS=Homo sapiens GN=ALDH18A1 PE=1 SV=2	ALDH18A1	P54886	7.12	87.248	795	21.761	13	13	40000000	17	6.41509	3	3	4100000	5	22	1.76553
U4/U6 small nuclear ribonucleoprotein Prp31 OS=Homo sapiens GN=PRPF31 PE=1 SV=2	PRPF31	Q8WWY3	5.78	55.421	499	6.41283	2	2	10000000	3	3.40681	1	1		1	4	1.58496
Probable ATP-dependent RNA helicase DDX23 OS=Homo sapiens GN=DDX23 PE=1 SV=3	DDX23	Q9BUQ8	9.55	95.524	820	3.90244	3	3	7200000	3	0.97561	1	1		1	4	1.58496
SWI/SNF-related matrix-associated actin-dependent regulator of chromatin subfamily E member 1 OS=Homo sapiens GN=SMARCE1 PE=1 SV=2	SMARCE1	Q969G3	4.88	46.621	411	10.219	3	3	14000000	3	3.64964	1	1	13000000	1	4	1.58496
U1 small nuclear ribonucleoprotein C OS=Homo sapiens GN=SNRPC PE=1 SV=1	SNRPC	A0A0A0MRR7	9.58	19.673	180	21.6667	3	3	23000000	3	10	1	1	34000000	1	4	1.58496
Isoform 9 of SUN domain-containing protein 1 OS=Homo sapiens GN=SUN1	SUN1	O94901-9	7.31	101.868	916	5.34934	3	3	4500000	3	1.74672	1	1		1	4	1.58496
14-3-3 protein eta OS=Homo sapiens GN=YWHAH PE=1 SV=4	YWHAH	Q04917	4.84	28.201	246	40.2439	11	6	340000000	15	10.5691	3	0	200000000	5	20	1.58496
U4/U6 small nuclear ribonucleoprotein Prp4 OS=Homo sapiens GN=PRPF4 PE=1 SV=2	PRPF4	O43172	7.42	58.412	522	9.77011	3	3	11000000	3	2.68199	1	1	5900000	1	4	1.58496
Capping protein (Actin filament) muscle Z-line, beta, isoform CRA_d OS=Homo sapiens GN=CAPZB PE=1 SV=1	CAPZB	B1AK88	6.43	33.76	301	10.6312	3	3	13000000	3	6.64452	1	1		1	4	1.58496
Pre-mRNA 3'-end-processing factor FIP1 OS=Homo sapiens GN=FIP1L1 PE=1 SV=1	FIP1L1	Q6UN15	5.59	66.487	594	3.53357	2	2	17000000	3	2.18855	1	1	5700000	1	4	1.58496
Isoform 2 of Transcription elongation factor B polypeptide 2 OS=Homo sapiens GN=TCEB2	TCEB2	Q15370-2	6.1	17.9	161	21.118	2	2	12000000	3	15.528	1	1	12000000	1	4	1.58496
KH domain-containing, RNA-binding, signal transduction-associated protein 1 OS=Homo sapiens GN=KHDRBS1 PE=1 SV=1	KHDRBS1	Q07666	8.66	48.197	443	17.6072	6	6	170000000	12	9.93228	3	3	110000000	4	16	1.58496
Isoform I of Protein SON OS=Homo sapiens GN=SON	SON	P18583-9	5.57	267.923	2466	1.74371	3	3	9800000	3	0.608273	1	1	5800000	1	4	1.58496
Casein kinase II subunit alpha' OS=Homo sapiens GN=CSNK2A2 PE=1 SV=1	CSNK2A2	P19784	8.56	41.187	350	11.7143	3	3	6900000	3	2.57143	1	1		1	4	1.58496
60S ribosomal protein L36a OS=Homo sapiens GN=RPL36A PE=3 SV=1	RPL36A	J3KQN4	10.43	16.368	142	13.3803	2	2	54000000	3	7.04225	1	1	8100000	1	4	1.58496
Protein RPL17-C18orf32 OS=Homo sapiens GN=RPL17-C18orf32 PE=1 SV=1	RPL17-C18orf32	A0A0A6YYL6	10.1	26.356	228	22.807	6	6	45000000	9	6.57895	2	2	25000000	3	12	1.58496
Isoform 2 of Cysteine-rich protein 2 OS=Homo sapiens GN=CRIP2	CRIP2	P52943-2	8.22	30.202	282	12.4113	2	2	90000000	3	5.67376	1	1	59000000	1	4	1.58496
Transcription activator BRG1 OS=Homo sapiens GN=SMARCA4 PE=1 SV=1	SMARCA4	A0A0A0MT49	8.12	188.742	1681	3.98572	6	6	8100000	6	1.48721	2	2	4400000	2	8	1.58496
28S ribosomal protein S12, mitochondrial OS=Homo sapiens GN=MRPS12 PE=1 SV=1	MRPS12	O15235	10.29	15.163	138	23.913	2	2	8600000	3	5.7971	1	1	12000000	1	4	1.58496
60S ribosomal protein L13a (Fragment) OS=Homo sapiens GN=RPL13A PE=1 SV=2	RPL13A	M0QYS1	10.86	24.2	210	12.8571	3	3	28000000	3	5.2381	1	1	6400000	1	4	1.58496
Ubiquitin-60S ribosomal protein L40 OS=Homo sapiens GN=UBA52 PE=1 SV=2	UBA52	P62987	9.83	14.719	128	28.125	4	2	29000000	6	20.3125	2	1	39000000	2	8	1.58496
Insulin-like growth factor 2 mRNA-binding protein 2 OS=Homo sapiens GN=IGF2BP2 PE=1 SV=1	IGF2BP2	F8W930	8.46	66.745	605	4.46281	2	2	120000000	3	2.31405	1	1		1	4	1.58496
AP-2 complex subunit alpha-1 OS=Homo sapiens GN=AP2A1 PE=1 SV=3	AP2A1	O95782	7.03	107.478	977	1.22825	1	1		3	1.02354	1	1	8900000	1	4	1.58496
Isoform 2 of Elongation factor 1-gamma OS=Homo sapiens GN=EEF1G	EEF1G	P26641-2	7.72	56.114	487	6.77618	3	3	19000000	3	1.64271	1	1	15000000	1	4	1.58496
Eukaryotic translation initiation factor 2A OS=Homo sapiens GN=EIF2A PE=1 SV=3	EIF2A	Q9BY44	8.87	64.949	585	7.00855	3	3	33000000	9	7.00855	3	3	33000000	3	12	1.58496
Probable ATP-dependent RNA helicase DDX46 OS=Homo sapiens GN=DDX46 PE=4 SV=1	DDX46	A0A0C4DG89	9.29	117.389	1032	3.00388	3	3	19000000	3	0.968992	1	1	11000000	1	4	1.58496
Vimentin OS=Homo sapiens GN=VIM PE=1 SV=4	VIM	P08670	5.12	53.619	466	87.5536	57	55	5100000000	251	82.8326	44	41	690000000	87	338	1.5286
40S ribosomal protein S3a OS=Homo sapiens GN=RPS3A PE=1 SV=2	RPS3A	P61247	9.73	29.926	264	46.5909	13	13	150000000	20	25	6	6	45000000	7	27	1.51457
40S ribosomal protein S9 OS=Homo sapiens GN=RPS9 PE=1 SV=3	RPS9	P46781	10.65	22.578	194	41.2371	11	11	170000000	14	18.5567	4	4	51000000	5	19	1.48543
Filamin-A OS=Homo sapiens GN=FLNA PE=1 SV=4	FLNA	P21333	6.06	280.564	2647	15.1114	29	29	110000000	36	6.57348	11	11	22000000	13	49	1.46949
L-lactate dehydrogenase B chain OS=Homo sapiens GN=LDHB PE=1 SV=2	LDHB	P07195	6.05	36.615	334	23.0539	7	5	510000000	11	8.38323	2	1	930000000	4	15	1.45943
T-complex protein 1 subunit zeta OS=Homo sapiens GN=CCT6A PE=1 SV=3	CCT6A	P40227	6.68	57.988	531	37.2881	13	13	180000000	22	8.6629	3	3	95000000	8	30	1.45943
General transcription factor II-I OS=Homo sapiens GN=GTF2I PE=1 SV=2	GTF2I	P78347	6.39	112.346	998	11.3226	9	9	31000000	11	6.01202	4	4	14000000	4	15	1.45943
60S ribosomal protein L19 OS=Homo sapiens GN=RPL19 PE=1 SV=1	RPL19	J3KTE4	11.47	23.233	194	18.5567	3	3	67000000	8	13.4021	2	2	45000000	3	11	1.41504
40S ribosomal protein S27 OS=Homo sapiens GN=RPS27L PE=1 SV=1	RPS27L	H0YMV8	9.32	11.338	100	33	4	1	330000000	8	21	2	2	360000000	3	11	1.41504
Catenin delta-1 OS=Homo sapiens GN=CTNND1 PE=1 SV=1	CTNND1	O60716	6.23	108.103	968	8.16116	6	6	9400000	8	5.06198	3	3	5000000	3	11	1.41504
Complement component 1 Q subcomponent-binding protein, mitochondrial OS=Homo sapiens GN=C1QBP PE=1 SV=1	C1QBP	Q07021	4.84	31.343	282	32.2695	4	4	25000000	5	20.2128	2	2		2	7	1.32193
14-3-3 protein beta/alpha OS=Homo sapiens GN=YWHAB PE=1 SV=3	YWHAB	P31946	4.83	28.065	246	54.065	13	6	340000000	25	34.5528	7	3	200000000	10	35	1.32193
Isoform 3 of Alpha-adducin OS=Homo sapiens GN=ADD1	ADD1	P35611-3	5.96	84.25	768	8.20312	3	3	28000000	5	3.51562	1	1	4900000	2	7	1.32193
Ubiquitin-40S ribosomal protein S27a OS=Homo sapiens GN=RPS27A PE=1 SV=2	RPS27A	P62979	9.64	17.953	156	36.5385	4	2	60000000	5	22.4359	2	1	13000000	2	7	1.32193
Heat shock protein HSP 90-beta OS=Homo sapiens GN=HSP90AB1 PE=1 SV=4	HSP90AB1	P08238	5.03	83.212	724	50.5525	29	17	490000000	55	31.768	18	7	180000000	22	77	1.32193
Eukaryotic initiation factor 4A-III OS=Homo sapiens GN=EIF4A3 PE=1 SV=4	EIF4A3	P38919	6.73	46.841	411	47.4453	18	16	330000000	36	22.1411	8	7	51000000	15	51	1.26303
Isoform 2 of Synaptopodin-2 OS=Homo sapiens GN=SYNPO2	SYNPO2	Q9UMS6-2	8.79	136.258	1261	11.4195	10	10	23000000	12	6.97859	5	5	14000000	5	17	1.26303
Tubulin alpha-1A chain OS=Homo sapiens GN=TUBA1A PE=1 SV=1	TUBA1A	Q71U36	5.06	50.104	451	77.8271	28	3	3900000000	176	60.0887	22	10	750000000	74	250	1.24998
Isoform 2 of ELAV-like protein 1 OS=Homo sapiens GN=ELAVL1	ELAVL1	Q15717-2	9.45	38.972	353	19.83	6	6	71000000	7	10.1983	3	3	22000000	3	10	1.22239
60S ribosomal protein L3 OS=Homo sapiens GN=RPL3 PE=1 SV=2	RPL3	P39023	10.18	46.08	403	29.7767	9	9	52000000	14	17.866	5	5	42000000	6	20	1.22239
60S ribosomal protein L30 OS=Homo sapiens GN=RPL30 PE=1 SV=2	RPL30	P62888	9.63	12.776	115	47.8261	4	4	45000000	7	37.3913	3	3	20000000	3	10	1.22239
Pinin OS=Homo sapiens GN=PNN PE=1 SV=4	PNN	Q9H307	7.14	81.565	717	8.92608	5	5	10000000	7	3.06834	2	2	7600000	3	10	1.22239
Guanine nucleotide-binding protein subunit beta-2-like 1 OS=Homo sapiens GN=GNB2L1 PE=1 SV=3	GNB2L1	P63244	7.69	35.055	317	61.5142	14	14	150000000	28	33.123	6	6	34000000	12	40	1.22239
Tubulin alpha-1B chain OS=Homo sapiens GN=TUBA1B PE=1 SV=1	TUBA1B	P68363	5.06	50.12	451	77.8271	28	3	3900000000	173	60.0887	22	10	800000000	75	248	1.20581
Tubulin beta-6 chain OS=Homo sapiens GN=TUBB6 PE=1 SV=1	TUBB6	Q9BUF5	4.88	49.825	446	24.4395	11	3	1500000000	39	16.8161	7	1	490000000	17	56	1.19794
60S ribosomal protein L26 OS=Homo sapiens GN=RPL26 PE=1 SV=1	RPL26	P61254	10.55	17.248	145	36.5517	7	7	52000000	9	24.8276	3	3	32000000	4	13	1.16993
Tubulin beta chain OS=Homo sapiens GN=TUBB PE=1 SV=2	TUBB	P07437	4.89	49.639	444	73.4234	28	5	2400000000	152	71.6216	25	5	700000000	69	221	1.1394
Tubulin beta-2A chain OS=Homo sapiens GN=TUBB2A PE=1 SV=1	TUBB2A	Q13885	4.89	49.875	445	57.3034	25	3	2300000000	121	52.809	21	2	700000000	55	176	1.1375
Tubulin beta-4A chain OS=Homo sapiens GN=TUBB4A PE=1 SV=2	TUBB4A	P04350	4.88	49.554	444	61.9369	22	2	2100000000	110	55.8559	20	2	660000000	52	162	1.08092
14-3-3 protein zeta/delta OS=Homo sapiens GN=YWHAZ PE=1 SV=1	YWHAZ	B7Z2E6	4.41	13.977	125	60.8	9	6	180000000	19	48	5	4	58000000	9	28	1.078
Tubulin beta-4B chain OS=Homo sapiens GN=TUBB4B PE=1 SV=1	TUBB4B	P68371	4.89	49.799	445	73.2584	28	1	2100000000	125	65.3933	24	1	660000000	60	185	1.05889
Tubulin alpha-4A chain OS=Homo sapiens GN=TUBA4A PE=1 SV=1	TUBA4A	P68366	5.06	49.892	448	48.4375	20	3	2300000000	118	42.8571	16	4	450000000	57	175	1.04975
14-3-3 protein theta OS=Homo sapiens GN=YWHAQ PE=1 SV=1	YWHAQ	P27348	4.78	27.747	245	60	18	13	450000000	31	37.1429	8	5	210000000	15	46	1.04731
LEM domain-containing protein 2 OS=Homo sapiens GN=LEMD2 PE=1 SV=1	LEMD2	Q8NC56	9	56.94	503	4.17495	2	2	11000000	2	1.98807	1	1	15000000	1	3	1
Isoform 2 of Programmed cell death 6-interacting protein OS=Homo sapiens GN=PDCD6IP	PDCD6IP	Q8WUM4-2	6.52	96.711	873	10.0802	5	5	17000000	6	3.89462	3	3	11000000	3	9	1
Copine-3 OS=Homo sapiens GN=CPNE3 PE=1 SV=1	CPNE3	O75131	5.85	60.092	537	4.46927	2	2	9900000	2	2.97952	1	1	3400000	1	3	1
Nucleolar transcription factor 1 OS=Homo sapiens GN=UBTF PE=1 SV=1	UBTF	P17480	5.81	89.35	764	4.58115	3	3	2700000	4	2.87958	2	2	9800000	2	6	1
Bcl-2-associated transcription factor 1 OS=Homo sapiens GN=BCLAF1 PE=1 SV=2	BCLAF1	Q9NYF8	9.98	106.059	920	10.1087	8	8	30000000	10	6.41304	5	5	17000000	5	15	1
Splicing factor 3B subunit 5 OS=Homo sapiens GN=SF3B5 PE=1 SV=1	SF3B5	Q9BWJ5	6.35	10.129	86	30.2326	2	2	11000000	2	12.7907	1	1	2300000	1	3	1
Multifunctional protein ADE2 OS=Homo sapiens GN=PAICS PE=1 SV=3	PAICS	P22234	7.23	47.049	425	18.3529	6	6	34000000	6	3.52941	1	1	13000000	3	9	1
U1 small nuclear ribonucleoprotein 70 kDa OS=Homo sapiens GN=SNRNP70 PE=1 SV=2	SNRNP70	P08621	9.94	51.526	437	16.476	6	6	25000000	6	8.00915	3	3	16000000	3	9	1
Cysteine and glycine-rich protein 2 OS=Homo sapiens GN=CSRP2 PE=1 SV=1	CSRP2	F8VQR7	8.41	20.664	187	12.2995	2	2	2600000	2	6.95187	1	1	5900000	1	3	1
Guanine nucleotide-binding protein G(s) subunit alpha isoforms XLas OS=Homo sapiens GN=GNAS PE=1 SV=2	GNAS	Q5JWF2	5.03	110.956	1037	2.60366	2	2	24000000	2	1.06075	1	1	27000000	1	3	1
40S ribosomal protein S6 OS=Homo sapiens GN=RPS6 PE=1 SV=1	RPS6	A2A3R7	5.48	10.408	91	30.7692	3	3	76000000	4	17.5824	2	2	4000000	2	6	1
60S ribosomal protein L32 OS=Homo sapiens GN=RPL32 PE=1 SV=1	RPL32	F8W727	10.59	17.951	153	8.49673	1	1	72000000	2	8.49673	1	1	23000000	1	3	1
Isoform 2 of Stathmin OS=Homo sapiens GN=STMN1	STMN1	P16949-2	7.02	19.811	174	23.5632	4	4	27000000	4	13.7931	2	2	7400000	2	6	1
Hepatoma-derived growth factor-related protein 2 OS=Homo sapiens GN=HDGFRP2 PE=1 SV=1	HDGFRP2	Q7Z4V5	7.49	74.272	671	2.23547	1	1	17000000	2	2.23547	1	1	8300000	1	3	1
ADP-ribosylation factor 4 OS=Homo sapiens GN=ARF4 PE=1 SV=3	ARF4	P18085	7.14	20.498	180	11.6667	2	1	11000000	2	5.55556	1	1	16000000	1	3	1
Histone-binding protein RBBP4 OS=Homo sapiens GN=RBBP4 PE=1 SV=3	RBBP4	Q09028	4.89	47.626	425	9.64706	4	1	20000000	4	5.64706	2	1	31000000	2	6	1
60S ribosomal protein L18 (Fragment) OS=Homo sapiens GN=RPL18 PE=1 SV=1	RPL18	F8VUA6	11.75	14.52	130	30.7692	3	3	53000000	6	28.4615	3	3	9900000	3	9	1
Beta-centractin OS=Homo sapiens GN=ACTR1B PE=1 SV=1	ACTR1B	P42025	6.4	42.267	376	7.97872	2	2	5800000	2	2.65957	1	1	17000000	1	3	1
Mitotic checkpoint protein BUB3 OS=Homo sapiens GN=BUB3 PE=1 SV=1	BUB3	J3QSX4	5.43	16.27	145	17.931	2	2	29000000	4	17.931	2	2	26000000	2	6	1
Plasminogen activator inhibitor 1 RNA-binding protein OS=Homo sapiens GN=SERBP1 PE=1 SV=2	SERBP1	Q8NC51	8.65	44.938	408	14.2157	4	4	78000000	6	7.59804	3	3	17000000	3	9	1
Neurabin-2 OS=Homo sapiens GN=PPP1R9B PE=1 SV=1	PPP1R9B	D3DTX6	4.97	89.28	817	5.01836	2	2	8200000	2	1.83599	1	1		1	3	1
Peroxisome proliferator-activated receptor delta OS=Homo sapiens GN=PPARD PE=1 SV=1	PPARD	Q03181	7.59	49.871	441	1.5873	1	1	530000000	2	1.5873	1	1	570000000	1	3	1
Isoform 2 of Transketolase OS=Homo sapiens GN=TKT	TKT	P29401-2	7.52	68.77	631	3.64501	2	2	14000000	2	1.42631	1	1	24000000	1	3	1
Small nuclear ribonucleoprotein Sm D2 OS=Homo sapiens GN=SNRPD2 PE=1 SV=1	SNRPD2	K7ERG4	8.69	8.771	78	25.641	2	2	17000000	2	12.8205	1	1	41000000	1	3	1
Transcription factor 4 OS=Homo sapiens GN=TCF4 PE=1 SV=2	TCF4	E9PH57	7.47	83.374	773	4.52781	2	2	17000000	2	2.45796	1	1	24000000	1	3	1
Leucine-rich repeat-containing protein 59 OS=Homo sapiens GN=LRRC59 PE=1 SV=1	LRRC59	I3L223	8.62	6.696	62	41.9355	3	3	18000000	4	41.9355	2	2	16000000	2	6	1
Cell division cycle and apoptosis regulator protein 1 OS=Homo sapiens GN=CCAR1 PE=1 SV=2	CCAR1	Q8IX12	5.76	132.739	1150	3.04348	2	2	6300000	2	2	1	1		1	3	1
ATP-binding cassette sub-family F member 1 OS=Homo sapiens GN=ABCF1 PE=1 SV=2	ABCF1	Q8NE71	6.8	95.866	845	4.26036	3	3	4200000	4	3.19527	2	2	7000000	2	6	1
40S ribosomal protein S12 OS=Homo sapiens GN=RPS12 PE=1 SV=3	RPS12	P25398	7.21	14.505	132	18.9394	2	2	40000000	2	11.3636	1	1		1	3	1
Eukaryotic translation initiation factor 2 subunit 3 OS=Homo sapiens GN=EIF2S3 PE=1 SV=3	EIF2S3	P41091	8.4	51.077	472	24.1525	8	8	36000000	12	14.8305	5	5	28000000	6	18	1
28 kDa heat- and acid-stable phosphoprotein OS=Homo sapiens GN=PDAP1 PE=1 SV=1	PDAP1	Q13442	8.87	20.618	181	27.6243	4	4	22000000	4	13.2597	2	2	13000000	2	6	1
39S ribosomal protein L16, mitochondrial OS=Homo sapiens GN=MRPL16 PE=1 SV=1	MRPL16	Q9NX20	10.13	28.431	251	10.757	2	2	7500000	2	4.38247	1	1		1	3	1
Histone-binding protein RBBP7 OS=Homo sapiens GN=RBBP7 PE=1 SV=1	RBBP7	Q16576	5.05	47.79	425	15.7647	5	2	20000000	6	9.17647	3	2		3	9	1
Ig lambda chain V-III region LOI OS=Homo sapiens PE=1 SV=1	NOGENE	P80748	5.08	11.928	111	7.20721	1	1	1800000000	2	7.20721	1	1	1900000000	1	3	1
60S ribosomal protein L8 OS=Homo sapiens GN=RPL8 PE=1 SV=2	RPL8	P62917	11.03	28.007	257	6.61479	2	2	17000000	4	9.33852	2	2	22000000	2	6	1
Isoform 3 of ATP-dependent 6-phosphofructokinase, muscle type OS=Homo sapiens GN=PFKM	PFKM	P08237-3	7.97	93.194	851	3.76028	2	2	6200000	2	1.05758	1	1		1	3	1
BolA-like protein 2 OS=Homo sapiens GN=BOLA2 PE=1 SV=1	BOLA2	Q9H3K6	6.52	10.11	86	40.6977	2	2	16000000	2	22.093	1	1		1	3	1
Paraspeckle component 1 OS=Homo sapiens GN=PSPC1 PE=1 SV=1	PSPC1	Q8WXF1	6.67	58.706	523	4.2065	2	2	9900000	2	1.52964	1	1	8500000	1	3	1
Isoform 2 of Catenin alpha-1 OS=Homo sapiens GN=CTNNA1	CTNNA1	P35221-2	6.34	102.571	930	11.5054	8	6	26000000	8	4.73118	4	3	16000000	4	12	1
Tubulin beta-3 chain OS=Homo sapiens GN=TUBB3 PE=1 SV=2	TUBB3	Q13509	4.93	50.4	450	66.6667	25	9	1700000000	80	46.8889	19	5	550000000	41	121	0.964376
Isoform 2 of Spectrin alpha chain, non-erythrocytic 1 OS=Homo sapiens GN=SPTAN1	SPTAN1	Q13813-2	5.35	284.919	2477	11.2233	19	19	71000000	27	6.62091	10	10	26000000	14	41	0.947533
14-3-3 protein gamma OS=Homo sapiens GN=YWHAG PE=1 SV=2	YWHAG	P61981	4.89	28.285	247	71.6599	18	11	340000000	25	48.9879	9	5	200000000	13	38	0.943416
Guanine nucleotide-binding protein subunit beta-2-like 1 (Fragment) OS=Homo sapiens GN=GNB2L1 PE=1 SV=1	GNB2L1	H0YAM7	7.85	27.398	247	55.8704	9	9	150000000	19	37.247	5	5	25000000	10	29	0.925999
Keratin, type I cuticular Ha3-II OS=Homo sapiens GN=KRT33B PE=1 SV=1	KRT33B	A0A087X2I6	4.84	46.103	404	27.4752	9	1	260000000	17	19.0594	7	5	65000000	9	26	0.917538
Isoform 2 of Heat shock protein HSP 90-alpha OS=Homo sapiens GN=HSP90AA1	HSP90AA1	P07900-2	5.16	98.099	854	28.5714	22	11	490000000	41	21.0773	16	5	160000000	22	63	0.89812
Isoform 3 of Poly(rC)-binding protein 2 OS=Homo sapiens GN=PCBP2	PCBP2	Q15366-3	6.79	38.197	362	66.5746	13	8	400000000	26	36.4641	9	5	78000000	14	40	0.893085
Keratin, type I cuticular Ha1 OS=Homo sapiens GN=KRT31 PE=2 SV=3	KRT31	Q15323	4.88	47.207	416	32.9327	11	2	260000000	20	25	9	7	65000000	11	31	0.862496
60S ribosomal protein L4 OS=Homo sapiens GN=RPL4 PE=1 SV=5	RPL4	P36578	11.06	47.667	427	32.0843	13	13	110000000	18	19.9063	9	9	73000000	10	28	0.847997
Histone H1x OS=Homo sapiens GN=H1FX PE=1 SV=1	H1FX	Q92522	10.76	22.474	213	30.5164	7	7	73000000	9	20.6573	5	5	24000000	5	14	0.847997
40S ribosomal protein S2 OS=Homo sapiens GN=RPS2 PE=1 SV=2	RPS2	P15880	10.24	31.305	293	34.1297	8	8	160000000	9	19.1126	5	5	53000000	5	14	0.847997
Serine/threonine-protein phosphatase PP1-beta catalytic subunit OS=Homo sapiens GN=PPP1CB PE=1 SV=3	PPP1CB	P62140	6.19	37.163	327	38.8379	12	2	86000000	18	27.5229	6	0	43000000	10	28	0.847997
Heat shock 70 kDa protein 1A/1B OS=Homo sapiens GN=HSPA1A PE=1 SV=5	HSPA1A	P08107	5.66	70.009	641	31.8253	15	13	270000000	23	25.429	11	10	83000000	13	36	0.823122
Serine/threonine-protein phosphatase PP1-alpha catalytic subunit OS=Homo sapiens GN=PPP1CA PE=1 SV=1	PPP1CA	P62136	6.33	37.488	330	47.5758	14	3	93000000	21	34.8485	8	1	44000000	12	33	0.807355
Ceruloplasmin OS=Homo sapiens GN=CP PE=1 SV=1	CP	P00450	5.72	122.128	1065	9.29577	9	9	66000000	14	6.57277	6	6	66000000	8	22	0.807355
Myosin regulatory light chain 12A OS=Homo sapiens GN=MYL12A PE=1 SV=1	MYL12A	J3QRS3	4.75	20.444	177	22.5989	4	4	24000000	7	12.4294	3	3	21000000	4	11	0.807355
GTP-binding nuclear protein Ran (Fragment) OS=Homo sapiens GN=RAN PE=1 SV=1	RAN	J3KQE5	9.58	26.799	234	30.3419	6	6	100000000	7	20.9402	4	4	41000000	4	11	0.807355
Isoform 2 of Poly(rC)-binding protein 2 OS=Homo sapiens GN=PCBP2	PCBP2	Q15366-2	6.79	38.627	366	62.5683	12	8	400000000	24	36.0656	9	5	78000000	14	38	0.777608
Splicing factor 3B subunit 3 OS=Homo sapiens GN=SF3B3 PE=1 SV=4	SF3B3	Q15393	5.26	135.492	1217	18.8168	15	15	92000000	22	15.8587	11	11	73000000	13	35	0.758992
Isoform 2 of Annexin A2 OS=Homo sapiens GN=ANXA2	ANXA2	P07355-2	8.37	40.386	357	53.2213	13	13	120000000	32	39.7759	10	10	80000000	19	51	0.752072
40S ribosomal protein S27 OS=Homo sapiens GN=RPS27 PE=1 SV=3	RPS27	P42677	9.45	9.455	84	40.4762	5	2	450000000	10	39.2857	4	4	360000000	6	16	0.736966
DAZ-associated protein 1 OS=Homo sapiens GN=DAZAP1 PE=1 SV=1	DAZAP1	Q96EP5	8.56	43.356	407	14.0049	4	4	26000000	5	11.5479	3	3	16000000	3	8	0.736966
Flotillin-1 OS=Homo sapiens GN=FLOT1 PE=1 SV=3	FLOT1	O75955	7.49	47.326	427	11.4754	4	4	18000000	5	6.79157	3	3	8600000	3	8	0.736966
Isoform 2 of 40S ribosomal protein S20 OS=Homo sapiens GN=RPS20	RPS20	P60866-2	9.32	15.995	142	26.0563	5	5	100000000	10	25.3521	4	4	83000000	6	16	0.736966
60S ribosomal protein L27a OS=Homo sapiens GN=RPL27A PE=1 SV=2	RPL27A	P46776	11	16.551	148	27.7027	5	5	68000000	5	20.9459	3	3	38000000	3	8	0.736966
Poly(rC)-binding protein 3 OS=Homo sapiens GN=PCBP3 PE=2 SV=2	PCBP3	P57721	8.07	39.44	371	20.4852	6	1	210000000	15	16.442	5	1	71000000	9	24	0.736966
60S ribosomal protein L7 OS=Homo sapiens GN=RPL7 PE=1 SV=1	RPL7	P18124	10.65	29.207	248	31.0484	8	8	58000000	10	16.129	3	3	30000000	6	16	0.736966
40S ribosomal protein S23 OS=Homo sapiens GN=RPS23 PE=1 SV=3	RPS23	P62266	10.49	15.798	143	23.7762	4	4	100000000	5	23.7762	3	3	45000000	3	8	0.736966
Pre-mRNA-processing factor 6 OS=Homo sapiens GN=PRPF6 PE=1 SV=1	PRPF6	O94906	8.25	106.858	941	6.26993	5	5	19000000	5	3.40064	3	3	6400000	3	8	0.736966
Eukaryotic translation initiation factor 2 subunit 1 OS=Homo sapiens GN=EIF2S1 PE=1 SV=3	EIF2S1	P05198	5.08	36.089	315	18.4127	5	5	36000000	5	9.52381	3	3	20000000	3	8	0.736966
Actin-related protein 3 OS=Homo sapiens GN=ACTR3 PE=1 SV=3	ACTR3	P61158	5.88	47.341	418	43.7799	11	11	45000000	13	30.1435	8	8	55000000	8	21	0.70044
Myosin-9 OS=Homo sapiens GN=MYH9 PE=1 SV=4	MYH9	P35579	5.6	226.392	1960	20.102	28	22	66000000	39	13.2653	17	12	55000000	24	63	0.70044
PC4 and SFRS1-interacting protein OS=Homo sapiens GN=PSIP1 PE=1 SV=1	PSIP1	O75475	9.13	60.067	530	22.6415	9	9	25000000	13	18.3019	7	7	53000000	8	21	0.70044
Keratin, type II cuticular Hb2 OS=Homo sapiens GN=KRT82 PE=1 SV=3	KRT82	Q9NSB4	6.74	56.616	513	9.35673	6	4	890000000	8	6.82261	4	3	1900000000	5	13	0.678072
Isoform 2 of Myb-binding protein 1A OS=Homo sapiens GN=MYBBP1A	MYBBP1A	Q9BQG0-2	9.28	149.274	1332	7.43243	8	8	9900000	8	5.40541	5	5	8300000	5	13	0.678072
60S ribosomal protein L12 OS=Homo sapiens GN=RPL12 PE=1 SV=1	RPL12	P30050	9.42	17.808	165	59.3939	7	7	160000000	8	38.1818	5	5	65000000	5	13	0.678072
Poly(rC)-binding protein 1 OS=Homo sapiens GN=PCBP1 PE=1 SV=2	PCBP1	Q15365	7.09	37.474	356	53.6517	11	8	250000000	24	42.6966	10	6	82000000	15	39	0.678072
Heterogeneous nuclear ribonucleoprotein Q OS=Homo sapiens GN=SYNCRIP PE=1 SV=2	SYNCRIP	O60506	8.59	69.56	623	23.9165	13	8	250000000	19	16.5329	9	5	110000000	12	31	0.662965
Isoform Gamma-2 of Serine/threonine-protein phosphatase PP1-gamma catalytic subunit OS=Homo sapiens GN=PPP1CC	PPP1CC	P36873-2	6.13	38.493	337	40.6528	12	1	93000000	19	33.8279	8	1	44000000	12	31	0.662965
60S ribosomal protein L7a OS=Homo sapiens GN=RPL7A PE=1 SV=2	RPL7A	P62424	10.61	29.977	266	48.1203	14	14	110000000	19	30.0752	7	7	57000000	12	31	0.662965
Elongation factor 2 OS=Homo sapiens GN=EEF2 PE=1 SV=4	EEF2	P13639	6.83	95.277	858	45.8042	29	28	200000000	60	34.965	22	21	97000000	38	98	0.658963
Protein RCC2 OS=Homo sapiens GN=RCC2 PE=1 SV=2	RCC2	Q9P258	8.78	56.049	522	36.59	15	15	88000000	22	23.9464	11	11	51000000	14	36	0.652077
Heat shock cognate 71 kDa protein OS=Homo sapiens GN=HSPA8 PE=1 SV=1	HSPA8	P11142	5.52	70.854	646	39.0093	22	19	420000000	36	26.935	15	13	110000000	23	59	0.646363
Putative pre-mRNA-splicing factor ATP-dependent RNA helicase DHX15 OS=Homo sapiens GN=DHX15 PE=1 SV=2	DHX15	O43143	7.46	90.875	795	18.9937	12	11	55000000	17	11.4465	8	7	50000000	11	28	0.628031
Putative keratin-87 protein OS=Homo sapiens GN=KRT87P PE=5 SV=4	KRT87P	A6NCN2	5.8	29.099	255	34.1176	12	1	150000000	17	22.7451	8	2	37000000	11	28	0.628031
Isoform 4 of Myosin-10 OS=Homo sapiens GN=MYH10	MYH10	P35580-4	5.55	232.385	2007	21.724	34	28	100000000	49	17.5884	24	19	69000000	32	81	0.61471
T-complex protein 1 subunit alpha OS=Homo sapiens GN=TCP1 PE=1 SV=1	TCP1	F5GZI8	4.48	10.354	100	35	3	3	87000000	3	20	2	2	13000000	2	5	0.584963
Apoptotic chromatin condensation inducer in the nucleus OS=Homo sapiens GN=ACIN1 PE=1 SV=2	ACIN1	E7EQT4	6.73	147.275	1301	3.68947	3	3	11000000	6	4.38125	4	4	8700000	4	10	0.584963
Isoform 3 of Hepatoma-derived growth factor OS=Homo sapiens GN=HDGF	HDGF	P51858-3	4.79	28.247	256	12.8906	2	2	13000000	3	12.8906	2	2	11000000	2	5	0.584963
Keratin, type I cuticular Ha6 OS=Homo sapiens GN=KRT36 PE=1 SV=1	KRT36	O76013	4.94	52.214	467	10.9208	6	3	130000000	9	8.56531	5	3	44000000	6	15	0.584963
60S ribosomal protein L18a OS=Homo sapiens GN=RPL18A PE=1 SV=2	RPL18A	Q02543	10.71	20.749	176	15.9091	3	3	51000000	3	11.9318	2	2	22000000	2	5	0.584963
Ubiquitin carboxyl-terminal hydrolase OS=Homo sapiens GN=UCHL1 PE=1 SV=1	UCHL1	D6R956	5.81	26.823	241	11.6183	2	2	40000000	3	7.46888	1	1		2	5	0.584963
Probable global transcription activator SNF2L1 OS=Homo sapiens GN=SMARCA1 PE=1 SV=1	SMARCA1	A0A0A0MRP6	8.46	122.786	1058	2.6465	3	3	12000000	3	1.79584	2	2	5800000	2	5	0.584963
Serine/arginine-rich-splicing factor 1 OS=Homo sapiens GN=SRSF1 PE=1 SV=1	SRSF1	J3KSW7	5.14	8.103	73	41.0959	3	3	23000000	3	26.0274	2	2	27000000	2	5	0.584963
Ig kappa chain V-I region Lay OS=Homo sapiens PE=1 SV=1	NOGENE	P01605	7.96	11.827	108	25	2	2	2600000000	3	8.33333	1	1	2800000000	2	5	0.584963
Collagen alpha-1(I) chain OS=Homo sapiens GN=COL1A1 PE=1 SV=5	COL1A1	P02452	5.8	138.857	1464	2.93716	3	3	18000000	3	1.91257	2	2	35000000	2	5	0.584963
Chromobox protein homolog 5 OS=Homo sapiens GN=CBX5 PE=1 SV=1	CBX5	P45973	5.86	22.211	191	36.6492	6	5	27000000	6	24.0838	4	3	18000000	4	10	0.584963
Cadherin-2 OS=Homo sapiens GN=CDH2 PE=1 SV=4	CDH2	P19022	4.81	99.747	906	2.86976	1	1	31000000	3	4.85651	2	2		2	5	0.584963
Calmodulin OS=Homo sapiens GN=CALM2 PE=1 SV=1	CALM2	E7EMB3	4.56	21.675	196	27.0408	6	6	120000000	12	27.0408	6	6	52000000	8	20	0.584963
60S ribosomal protein L11 OS=Homo sapiens GN=RPL11 PE=1 SV=2	RPL11	P62913	9.6	20.24	178	32.0225	6	6	120000000	6	21.9101	4	4	92000000	4	10	0.584963
Ezrin OS=Homo sapiens GN=EZR PE=1 SV=3	EZR	E7EQR4	6.16	69.329	586	5.11945	3	3	7000000	3	2.55973	2	2	7600000	2	5	0.584963
Nuclear pore complex protein Nup160 OS=Homo sapiens GN=NUP160 PE=1 SV=3	NUP160	Q12769	5.5	162.017	1436	3.1337	2	2	22000000	3	3.1337	2	2		2	5	0.584963
Isoform 2 of Actin-related protein 2 OS=Homo sapiens GN=ACTR2	ACTR2	P61160-2	7.2	45.348	399	12.5313	4	4	28000000	6	12.5313	4	4	24000000	4	10	0.584963
Heterogeneous nuclear ribonucleoprotein H OS=Homo sapiens GN=HNRNPH1 PE=1 SV=1	HNRNPH1	D6R9D3	4.44	4.347	40	37.5	2	2	390000000	3	37.5	2	2	160000000	2	5	0.584963
Isoform 2 of Actin-related protein 2/3 complex subunit 4 OS=Homo sapiens GN=ARPC4	ARPC4	P59998-2	5.88	71.673	625	4.48	3	3	43000000	3	3.04	2	2	38000000	2	5	0.584963
Spectrin beta chain, non-erythrocytic 2 OS=Homo sapiens GN=SPTBN2 PE=1 SV=3	SPTBN2	O15020	6.11	271.157	2390	2.76151	4	3	14000000	6	2.67782	4	2	12000000	4	10	0.584963
Beta-enolase OS=Homo sapiens GN=ENO3 PE=1 SV=5	ENO3	P13929	7.71	46.957	434	13.5945	3	1	46000000	6	9.447	2	1	37000000	4	10	0.584963
Dynein light chain 1, cytoplasmic OS=Homo sapiens GN=DYNLL1 PE=1 SV=1	DYNLL1	P63167	7.4	10.359	89	24.7191	2	2	64000000	3	21.3483	2	2	45000000	2	5	0.584963
Catenin alpha-2 OS=Homo sapiens GN=CTNNA2 PE=1 SV=5	CTNNA2	P26232	5.71	105.247	953	4.617	3	1	12000000	3	2.83316	2	1	15000000	2	5	0.584963
39S ribosomal protein L14, mitochondrial OS=Homo sapiens GN=MRPL14 PE=1 SV=1	MRPL14	Q6P1L8	10.24	15.937	145	22.7586	2	2	22000000	6	29.6552	3	3	43000000	4	10	0.584963
Isoform 2 of Eukaryotic initiation factor 4A-II OS=Homo sapiens GN=EIF4A2	EIF4A2	Q14240-2	5.48	46.46	408	18.3824	6	2	270000000	12	9.80392	3	2	62000000	8	20	0.584963
Spectrin beta chain, non-erythrocytic 1 OS=Homo sapiens GN=SPTBN1 PE=1 SV=1	SPTBN1	A0A087WUZ3	5.57	274.659	2366	10.7777	17	16	63000000	24	7.31192	12	10	36000000	16	40	0.584963
Peptidyl-prolyl cis-trans isomerase D OS=Homo sapiens GN=PPID PE=1 SV=3	PPID	Q08752	7.21	40.738	370	15.6757	5	5	33000000	6	9.72973	3	3	55000000	4	10	0.584963
Ubiquitin-like modifier-activating enzyme 1 OS=Homo sapiens GN=UBA1 PE=1 SV=3	UBA1	P22314	5.76	117.774	1058	7.08885	6	6	8700000	6	5.7656	4	4	13000000	4	10	0.584963
Serine/threonine-protein phosphatase PGAM5, mitochondrial OS=Homo sapiens GN=PGAM5 PE=1 SV=2	PGAM5	Q96HS1	8.68	31.985	289	7.61246	2	2	21000000	3	7.61246	2	2	5500000	2	5	0.584963
DNA-dependent protein kinase catalytic subunit OS=Homo sapiens GN=PRKDC PE=1 SV=3	PRKDC	P78527	7.12	468.788	4128	10.2229	29	29	36000000	35	6.6376	20	20	22000000	24	59	0.544321
X-ray repair cross-complementing protein 5 OS=Homo sapiens GN=XRCC5 PE=1 SV=3	XRCC5	P13010	5.81	82.652	732	17.8962	7	7	51000000	13	14.6175	6	6	35000000	9	22	0.530515
40S ribosomal protein SA OS=Homo sapiens GN=RPSA PE=4 SV=1	RPSA	A0A0C4DG17	4.87	33.293	300	32.6667	6	6	85000000	13	27.6667	6	6	47000000	9	22	0.530515
Thyroid hormone receptor-associated protein 3 OS=Homo sapiens GN=THRAP3 PE=1 SV=2	THRAP3	Q9Y2W1	10.15	108.601	955	11.4136	8	8	81000000	13	8.79581	6	6	58000000	9	22	0.530515
Isoform 3 of Polypyrimidine tract-binding protein 1 OS=Homo sapiens GN=PTBP1	PTBP1	P26599-3	9.16	59.596	557	46.6786	16	14	130000000	36	40.5745	14	13	93000000	25	61	0.526069
116 kDa U5 small nuclear ribonucleoprotein component OS=Homo sapiens GN=EFTUD2 PE=1 SV=1	EFTUD2	Q15029	5	109.366	972	20.9877	15	14	140000000	20	15.7407	11	10	88000000	14	34	0.514573
Nucleoprotein TPR OS=Homo sapiens GN=TPR PE=1 SV=3	TPR	P12270	5.02	267.131	2363	5.62844	9	9	19000000	10	3.04697	5	5	19000000	7	17	0.514573
Heterogeneous nuclear ribonucleoprotein H3 OS=Homo sapiens GN=HNRNPH3 PE=1 SV=2	HNRNPH3	P31942	6.87	36.903	346	27.4566	7	7	120000000	10	21.6763	6	6	100000000	7	17	0.514573
Fascin OS=Homo sapiens GN=FSCN1 PE=1 SV=3	FSCN1	Q16658	7.24	54.496	493	15.0101	7	7	56000000	10	13.1846	6	6	18000000	7	17	0.514573
Keratin, type II cuticular Hb6 OS=Homo sapiens GN=KRT86 PE=1 SV=1	KRT86	O43790	5.66	53.466	486	27.1605	18	4	240000000	27	25.7202	15	6	120000000	19	46	0.50696
Keratin, type II cuticular Hb3 OS=Homo sapiens GN=KRT83 PE=1 SV=2	KRT83	P78385	5.64	54.161	493	26.7748	18	3	240000000	27	25.355	15	6	120000000	19	46	0.50696
Heterogeneous nuclear ribonucleoprotein U-like protein 2 OS=Homo sapiens GN=HNRNPUL2 PE=1 SV=1	HNRNPUL2	Q1KMD3	4.91	85.052	747	17.0013	12	12	51000000	14	11.9143	7	7	32000000	10	24	0.485427
Flotillin-2 OS=Homo sapiens GN=FLOT2 PE=1 SV=1	FLOT2	E7EMK3	5.24	53.104	483	17.3913	6	6	18000000	7	10.352	4	4	13000000	5	12	0.485427
40S ribosomal protein S13 OS=Homo sapiens GN=RPS13 PE=1 SV=2	RPS13	P62277	10.54	17.212	151	25.8278	5	5	58000000	7	26.4901	3	3	20000000	5	12	0.485427
Keratin, type I cuticular Ha5 OS=Homo sapiens GN=KRT35 PE=2 SV=5	KRT35	Q92764	4.91	50.329	455	11.4286	5	1	130000000	7	9.23077	4	3	48000000	5	12	0.485427
Keratin, type I cuticular Ha2 OS=Homo sapiens GN=KRT32 PE=1 SV=3	KRT32	Q14532	4.84	50.31	448	10.9375	5	1	140000000	7	8.03571	4	2	54000000	5	12	0.485427
Pre-mRNA-processing-splicing factor 8 OS=Homo sapiens GN=PRPF8 PE=1 SV=2	PRPF8	Q6P2Q9	8.84	273.427	2335	6.68094	11	11	22000000	14	4.49679	8	8	19000000	10	24	0.485427
Neurofilament medium polypeptide OS=Homo sapiens GN=NEFM PE=1 SV=3	NEFM	P07197	4.91	102.411	916	3.27511	4	1	870000000	7	2.29258	3	1	140000000	5	12	0.485427
Nuclear mitotic apparatus protein 1 OS=Homo sapiens GN=NUMA1 PE=1 SV=2	NUMA1	Q14980	5.78	238.115	2115	20.5674	33	33	49000000	39	15.9811	25	25	41000000	29	68	0.427421
Ras-related protein Rab-10 OS=Homo sapiens GN=RAB10 PE=1 SV=1	RAB10	P61026	8.38	22.527	200	17	3	3	17000000	4	17	3	3	10000000	3	7	0.415037
60S ribosomal protein L14 OS=Homo sapiens GN=RPL14 PE=1 SV=4	RPL14	P50914	10.93	23.417	215	19.0698	4	4	150000000	4	9.30233	2	2	58000000	3	7	0.415037
Heterochromatin protein 1-binding protein 3 OS=Homo sapiens GN=HP1BP3 PE=1 SV=1	HP1BP3	Q5SSJ5	9.67	61.169	553	9.76492	4	4	12000000	4	6.69078	2	2	19000000	3	7	0.415037
High mobility group protein B2 OS=Homo sapiens GN=HMGB2 PE=1 SV=2	HMGB2	P26583	7.81	24.019	209	33.4928	7	6	39000000	8	19.6172	4	3	39000000	6	14	0.415037
Microtubule-associated protein OS=Homo sapiens GN=MAP4 PE=1 SV=1	MAP4	F8W9U4	9.22	88.222	828	4.58937	3	3	14000000	4	4.95169	3	3	7900000	3	7	0.415037
60S ribosomal protein L31 OS=Homo sapiens GN=RPL31 PE=1 SV=1	RPL31	B7Z4E3	10.65	13.947	120	28.3333	3	3	130000000	4	21.6667	3	3	120000000	3	7	0.415037
Caldesmon OS=Homo sapiens GN=CALD1 PE=1 SV=1	CALD1	E9PGZ1	6.11	61.669	536	9.32836	4	4	18000000	4	6.34328	3	3	14000000	3	7	0.415037
Serine/arginine-rich splicing factor 6 OS=Homo sapiens GN=SRSF6 PE=1 SV=2	SRSF6	Q13247	11.43	39.563	344	10.7558	4	4	19000000	4	5.52326	2	2	30000000	3	7	0.415037
Isoform 2 of Chromodomain-helicase-DNA-binding protein 4 OS=Homo sapiens GN=CHD4	CHD4	Q14839-2	5.97	220.709	1940	2.52577	4	4	15000000	4	1.59794	3	3	11000000	3	7	0.415037
60 kDa heat shock protein, mitochondrial OS=Homo sapiens GN=HSPD1 PE=1 SV=2	HSPD1	P10809	5.87	61.016	573	21.9895	9	9	41000000	12	11.8674	5	5	38000000	9	21	0.415037
Cisplatin resistance-associated overexpressed protein, isoform CRA_b OS=Homo sapiens GN=LUC7L3 PE=1 SV=1	LUC7L3	J3KPP4	9.92	58.185	489	7.56646	3	3	3700000	4	5.52147	2	2	7300000	3	7	0.415037
Isoform 4 of 40S ribosomal protein S24 OS=Homo sapiens GN=RPS24	RPS24	P62847-4	10.15	32.41	289	7.95848	2	2	58000000	4	13.1488	3	3	25000000	3	7	0.415037
TATA-binding protein-associated factor 2N OS=Homo sapiens GN=TAF15 PE=1 SV=1	TAF15	A0A075B7D9	5.08	48.809	449	11.804	4	2	110000000	8	11.804	4	2	67000000	6	14	0.415037
Aldose reductase OS=Homo sapiens GN=AKR1B1 PE=1 SV=3	AKR1B1	P15121	6.98	35.83	316	5.6962	1	1	21000000	4	5.6962	1	1	8200000	3	7	0.415037
60S ribosomal protein L6 OS=Homo sapiens GN=RPL6 PE=1 SV=3	RPL6	Q02878	10.58	32.708	288	42.0139	12	12	95000000	16	38.1944	11	11	55000000	12	28	0.415037
60S ribosomal protein L10a OS=Homo sapiens GN=RPL10A PE=1 SV=2	RPL10A	P62906	9.94	24.816	217	19.8157	5	5	59000000	8	22.5806	4	4	22000000	6	14	0.415037
Cell division cycle 5-like protein OS=Homo sapiens GN=CDC5L PE=1 SV=2	CDC5L	Q99459	8.18	92.194	802	6.60848	4	4	16000000	4	5.11222	3	3	25000000	3	7	0.415037
Probable ATP-dependent RNA helicase DDX17 OS=Homo sapiens GN=DDX17 PE=1 SV=1	DDX17	H3BLZ8	8.37	80.389	731	26.8126	14	8	210000000	21	22.1614	13	8	180000000	16	37	0.392317
Non-POU domain-containing octamer-binding protein OS=Homo sapiens GN=NONO PE=1 SV=4	NONO	Q15233	8.95	54.197	471	46.0722	19	18	250000000	35	41.189	16	15	260000000	27	62	0.374396
Profilin-1 OS=Homo sapiens GN=PFN1 PE=1 SV=2	PFN1	P07737	8.27	15.045	140	59.2857	7	7	270000000	9	33.5714	4	4	73000000	7	16	0.36257
Far upstream element-binding protein 1 OS=Homo sapiens GN=FUBP1 PE=1 SV=1	FUBP1	E9PEB5	7.93	68.861	655	24.8855	13	9	110000000	18	19.3893	11	8	71000000	14	32	0.36257
TAR DNA-binding protein 43 OS=Homo sapiens GN=TARDBP PE=1 SV=1	TARDBP	Q13148	6.19	44.711	414	26.8116	7	7	54000000	9	20.7729	5	5	43000000	7	16	0.36257
Alpha-enolase OS=Homo sapiens GN=ENO1 PE=1 SV=2	ENO1	P06733	7.39	47.139	434	41.4747	14	12	98000000	27	40.7834	13	13	82000000	21	48	0.36257
Alpha-actinin-4 OS=Homo sapiens GN=ACTN4 PE=1 SV=2	ACTN4	O43707	5.44	104.788	911	17.124	12	8	50000000	14	12.7333	10	5	39000000	11	25	0.347923
Serine/arginine repetitive matrix protein 2 OS=Homo sapiens GN=SRRM2 PE=1 SV=2	SRRM2	Q9UQ35	12.06	299.438	2752	5.59593	11	11	26000000	14	5.41424	11	11	19000000	11	25	0.347923
Isoform 2 of Cleavage and polyadenylation specificity factor subunit 6 OS=Homo sapiens GN=CPSF6	CPSF6	Q16630-2	7.71	63.432	588	6.29252	3	3	38000000	5	5.10204	2	2	38000000	4	9	0.321928
Keratin, type II cuticular Hb5 OS=Homo sapiens GN=KRT85 PE=1 SV=1	KRT85	F5GYI5	5.62	32.525	295	30.8475	12	4	110000000	15	30.8475	10	4	37000000	12	27	0.321928
Elongation factor Tu, mitochondrial OS=Homo sapiens GN=TUFM PE=1 SV=2	TUFM	P49411	7.61	49.51	452	13.9381	5	5	22000000	5	10.8407	4	4	22000000	4	9	0.321928
Eukaryotic translation initiation factor 5A-1 OS=Homo sapiens GN=EIF5A PE=1 SV=1	EIF5A	I3L504	5.25	20.49	186	23.6559	3	3	33000000	5	23.6559	3	3	37000000	4	9	0.321928
Small ubiquitin-related modifier 2 OS=Homo sapiens GN=SUMO2 PE=1 SV=3	SUMO2	P61956	5.5	10.864	95	27.3684	3	3	120000000	5	27.3684	3	3	76000000	4	9	0.321928
Isoform 2 of Heterogeneous nuclear ribonucleoprotein R OS=Homo sapiens GN=HNRNPR	HNRNPR	O43390-2	8.13	71.17	636	31.4465	17	12	300000000	25	28.7736	15	11	230000000	20	45	0.321928
Poly(U)-binding-splicing factor PUF60 OS=Homo sapiens GN=PUF60 PE=1 SV=1	PUF60	Q9UHX1	5.29	59.838	559	8.58676	3	3	6000000	5	8.58676	3	3	6800000	4	9	0.321928
40S ribosomal protein S15a OS=Homo sapiens GN=RPS15A PE=1 SV=2	RPS15A	P62244	10.13	14.83	130	31.5385	4	4	150000000	5	23.8462	3	3	27000000	4	9	0.321928
Gelsolin OS=Homo sapiens GN=GSN PE=1 SV=1	GSN	A0A0A0MS51	5.63	82.474	748	8.68984	5	5	17000000	5	7.21925	4	4	28000000	4	9	0.321928
60S ribosomal protein L24 OS=Homo sapiens GN=RPL24 PE=1 SV=1	RPL24	C9JNW5	10.78	17.532	150	25.3333	4	4	110000000	5	26	4	4	56000000	4	9	0.321928
60S ribosomal protein L10 OS=Homo sapiens GN=RPL10 PE=1 SV=4	RPL10	P27635	10.08	24.588	214	35.0467	6	6	91000000	10	33.1776	6	6	27000000	8	18	0.321928
Lamin B2, isoform CRA_a OS=Homo sapiens GN=LMNB2 PE=1 SV=1	LMNB2	J9JID7	5.59	69.906	620	12.9032	9	7	93000000	10	12.7419	8	5	110000000	8	18	0.321928
Heterogeneous nuclear ribonucleoprotein H2 OS=Homo sapiens GN=HNRNPH2 PE=1 SV=1	HNRNPH2	P55795	6.3	49.232	449	18.0401	8	1	400000000	25	27.3942	10	3	360000000	20	45	0.321928
Pre-mRNA-processing factor 19 OS=Homo sapiens GN=PRPF19 PE=1 SV=1	PRPF19	Q9UMS4	6.61	55.146	504	26.5873	9	9	77000000	11	18.6508	6	6	54000000	9	20	0.289507
Myosin light polypeptide 6 OS=Homo sapiens GN=MYL6 PE=1 SV=1	MYL6	J3KND3	4.65	17.047	152	55.2632	8	8	110000000	11	55.2632	8	8	75000000	9	20	0.289507
U5 small nuclear ribonucleoprotein 40 kDa protein OS=Homo sapiens GN=SNRNP40 PE=1 SV=1	SNRNP40	Q96DI7	8.1	39.286	357	24.0896	3	3	32000000	6	16.2465	2	2	11000000	5	11	0.263034
40S ribosomal protein S4, X isoform OS=Homo sapiens GN=RPS4X PE=1 SV=2	RPS4X	P62701	10.15	29.579	263	41.0646	12	12	270000000	18	41.0646	11	11	170000000	15	33	0.263034
Fatty acid-binding protein, epidermal OS=Homo sapiens GN=FABP5 PE=1 SV=3	FABP5	Q01469	7.01	15.155	135	25.9259	2	2	9500000	6	40.7407	4	4	84000000	5	11	0.263034
ATP-dependent RNA helicase DDX39A OS=Homo sapiens GN=DDX39A PE=1 SV=2	DDX39A	O00148	5.68	49.098	427	12.4122	5	2	67000000	6	9.60187	4	4	72000000	5	11	0.263034
Neurofilament heavy polypeptide OS=Homo sapiens GN=NEFH PE=1 SV=4	NEFH	P12036	6.18	112.411	1026	2.63158	4	1	950000000	6	1.75439	3	0	1200000000	5	11	0.263034
60S ribosomal protein L23a OS=Homo sapiens GN=RPL23A PE=1 SV=1	RPL23A	K7EMA7	9.23	7.918	70	48.5714	5	5	170000000	6	48.5714	5	5	110000000	5	11	0.263034
Heterogeneous nuclear ribonucleoprotein R OS=Homo sapiens GN=HNRNPR PE=1 SV=1	HNRNPR	O43390	8.13	70.899	633	31.5956	17	12	300000000	25	31.5956	16	12	230000000	21	46	0.251539
Cleavage and polyadenylation specificity factor subunit 5 OS=Homo sapiens GN=NUDT21 PE=1 SV=1	NUDT21	O43809	8.82	26.211	227	47.1366	8	8	94000000	13	49.3392	7	7	62000000	11	24	0.241008
40S ribosomal protein S17-like OS=Homo sapiens GN=RPS17L PE=1 SV=1	RPS17L	P0CW22	9.85	15.54	135	40	5	5	55000000	13	40	5	5	43000000	11	24	0.241008
Peroxiredoxin-2 OS=Homo sapiens GN=PRDX2 PE=1 SV=5	PRDX2	P32119	5.97	21.878	198	49.4949	7	6	99000000	13	45.4545	6	5	45000000	11	24	0.241008
Far upstream element-binding protein 2 OS=Homo sapiens GN=KHSRP PE=1 SV=1	KHSRP	A0A087WTP3	7.71	72.982	711	27.8481	15	12	83000000	20	27.2855	14	11	81000000	17	37	0.234465
Actin-related protein 2/3 complex subunit 1B OS=Homo sapiens GN=ARPC1B PE=1 SV=3	ARPC1B	O15143	8.35	40.923	372	19.3548	5	5	27000000	7	11.0215	3	3	13000000	6	13	0.222392
Transcription intermediary factor 1-beta OS=Homo sapiens GN=TRIM28 PE=1 SV=5	TRIM28	Q13263	5.77	88.493	835	22.1557	10	10	78000000	14	20	10	10	51000000	12	26	0.222392
Nuclear pore complex protein Nup93 OS=Homo sapiens GN=NUP93 PE=1 SV=1	NUP93	H3BVG0	5.73	99.492	880	10.7955	6	6	36000000	7	8.06818	4	4	16000000	6	13	0.222392
Cofilin-1 OS=Homo sapiens GN=CFL1 PE=1 SV=1	CFL1	E9PK25	8.34	22.714	204	49.5098	11	11	340000000	22	53.9216	12	12	220000000	19	41	0.211504
Splicing factor, proline- and glutamine-rich OS=Homo sapiens GN=SFPQ PE=1 SV=2	SFPQ	P23246	9.44	76.102	707	42.5743	25	24	310000000	46	34.0877	19	18	300000000	40	86	0.201634
NHP2-like protein 1 OS=Homo sapiens GN=NHP2L1 PE=1 SV=1	NHP2L1	B1AHD1	8.46	14.618	132	58.3333	6	6	100000000	8	43.1818	5	5	82000000	7	15	0.192645
Histone deacetylase 2 OS=Homo sapiens GN=HDAC2 PE=1 SV=2	HDAC2	Q92769	5.91	55.329	488	13.3197	5	5	18000000	8	9.63115	4	4	19000000	7	15	0.192645
FACT complex subunit SPT16 OS=Homo sapiens GN=SUPT16H PE=1 SV=1	SUPT16H	Q9Y5B9	5.66	119.838	1047	8.11843	6	6	85000000	8	7.54537	7	7	69000000	7	15	0.192645
Tropomyosin alpha-4 chain OS=Homo sapiens GN=TPM4 PE=1 SV=3	TPM4	P67936	4.69	28.504	248	40.3226	12	5	57000000	17	34.6774	10	4	46000000	15	32	0.180572
DNA topoisomerase 1 OS=Homo sapiens GN=TOP1 PE=1 SV=2	TOP1	P11387	9.31	90.669	765	13.9869	8	8	25000000	9	12.2876	8	8	22000000	8	17	0.169925
Tricarboxylate transport protein, mitochondrial OS=Homo sapiens GN=SLC25A1 PE=1 SV=2	SLC25A1	P53007	9.89	33.991	311	20.2572	6	6	84000000	9	17.6849	5	5	56000000	8	17	0.169925
Galectin-1 OS=Homo sapiens GN=LGALS1 PE=1 SV=2	LGALS1	P09382	5.5	14.706	135	52.5926	6	6	140000000	9	34.8148	4	4	160000000	8	17	0.169925
Elongation factor 1-alpha 2 OS=Homo sapiens GN=EEF1A2 PE=1 SV=1	EEF1A2	Q05639	9.03	50.438	463	32.8294	10	4	690000000	18	18.5745	7	7	540000000	16	34	0.169925
Peptidyl-prolyl cis-trans isomerase A OS=Homo sapiens GN=PPIA PE=1 SV=2	PPIA	P62937	7.81	18.001	165	49.0909	7	7	1200000000	48	53.3333	8	8	750000000	43	91	0.158698
Isoform 4 of Double-stranded RNA-specific adenosine deaminase OS=Homo sapiens GN=ADAR	ADAR	P55265-4	8.56	140.749	1269	9.29866	9	9	69000000	10	7.171	7	7	24000000	9	19	0.152003
Fibulin-1 OS=Homo sapiens GN=FBLN1 PE=1 SV=4	FBLN1	P23142	5.22	77.162	703	8.81935	6	1	77000000	10	10.2418	7	1	220000000	9	19	0.152003
Cell cycle and apoptosis regulator protein 2 OS=Homo sapiens GN=CCAR2 PE=1 SV=2	CCAR2	Q8N163	5.22	102.838	923	14.3012	8	8	60000000	10	13.0011	9	9	45000000	9	19	0.152003
Fibulin-1 OS=Homo sapiens GN=FBLN1 PE=1 SV=1	FBLN1	B1AHL2	5.39	78.277	721	8.32178	6	1	85000000	10	9.70874	7	1	220000000	9	19	0.152003
Core histone macro-H2A.1 OS=Homo sapiens GN=H2AFY PE=1 SV=4	H2AFY	O75367	9.79	39.592	372	53.2258	14	13	240000000	31	53.2258	13	12	290000000	28	59	0.146841
Histone H3.2 OS=Homo sapiens GN=HIST2H3A PE=1 SV=3	HIST2H3A	Q71DI3	11.27	15.379	136	36.7647	4	1	980000000	21	50.7353	6	1	1200000000	19	40	0.14439
Heat shock protein beta-1 OS=Homo sapiens GN=HSPB1 PE=1 SV=2	HSPB1	P04792	6.4	22.768	205	86.8293	12	12	400000000	21	86.8293	12	12	230000000	19	40	0.14439
Isoform 7 of Interleukin enhancer-binding factor 3 OS=Homo sapiens GN=ILF3	ILF3	Q12906-7	8.81	95.748	898	27.8396	20	20	150000000	32	30.4009	21	21	130000000	29	61	0.142019
Cellular nucleic acid-binding protein OS=Homo sapiens GN=CNBP PE=1 SV=1	CNBP	P62633	7.71	19.45	177	49.1525	7	7	54000000	11	46.3277	7	7	26000000	10	21	0.137504
Heterogeneous nuclear ribonucleoprotein A3 OS=Homo sapiens GN=HNRNPA3 PE=1 SV=2	HNRNPA3	P51991	9.01	39.571	378	47.619	20	3	220000000	34	41.2698	16	16	190000000	31	65	0.133267
Hornerin OS=Homo sapiens GN=HRNR PE=1 SV=2	HRNR	Q86YZ3	10.04	282.228	2850	33.9649	29	29	160000000	69	33.9298	29	29	220000000	63	132	0.131245
Heterogeneous nuclear ribonucleoprotein A0 OS=Homo sapiens GN=HNRNPA0 PE=1 SV=1	HNRNPA0	Q13151	9.29	30.822	305	25.9016	7	6	76000000	12	33.7705	9	9	60000000	11	23	0.125531
ATP-dependent RNA helicase A OS=Homo sapiens GN=DHX9 PE=1 SV=4	DHX9	Q08211	6.84	140.869	1270	35.8268	36	36	210000000	60	35.6693	36	36	130000000	55	115	0.125531
40S ribosomal protein S16 OS=Homo sapiens GN=RPS16 PE=1 SV=2	RPS16	P62249	10.21	16.435	146	48.6301	9	9	300000000	13	49.3151	8	8	120000000	12	25	0.115477
Nucleolar protein 56 OS=Homo sapiens GN=NOP56 PE=1 SV=4	NOP56	O00567	9.19	66.009	594	24.2424	10	10	190000000	14	24.4108	10	10	250000000	13	27	0.106915
Heterogeneous nuclear ribonucleoprotein A1 OS=Homo sapiens GN=HNRNPA1 PE=1 SV=5	HNRNPA1	P09651	9.13	38.723	372	44.8925	21	17	220000000	42	48.1183	19	17	180000000	39	81	0.106915
40S ribosomal protein S18 OS=Homo sapiens GN=RPS18 PE=1 SV=3	RPS18	P62269	10.99	17.708	152	48.6842	10	10	190000000	15	47.3684	9	9	200000000	14	29	0.0995357
40S ribosomal protein S11 OS=Homo sapiens GN=RPS11 PE=1 SV=3	RPS11	P62280	10.3	18.419	158	41.7722	8	8	170000000	15	41.1392	8	8	96000000	14	29	0.0995357
RNA-binding protein FUS OS=Homo sapiens GN=FUS PE=1 SV=1	FUS	H3BPE7	9.36	53.465	527	17.8368	8	6	150000000	15	15.1803	7	5	89000000	14	29	0.0995357
Heterogeneous nuclear ribonucleoprotein L OS=Homo sapiens GN=HNRNPL PE=1 SV=2	HNRNPL	P14866	8.22	64.092	589	52.9711	18	18	380000000	47	38.0306	15	15	300000000	44	91	0.0951572
Isoform 2 of Heterogeneous nuclear ribonucleoprotein A3 OS=Homo sapiens GN=HNRNPA3	HNRNPA3	P51991-2	8.31	37.006	356	45.5056	18	1	220000000	32	39.8876	15	15	190000000	30	62	0.0931094
Elongation factor 1-alpha 1 OS=Homo sapiens GN=EEF1A1 PE=1 SV=1	EEF1A1	P68104	9.01	50.109	462	50.4329	14	8	1000000000	36	50	14	14	810000000	34	70	0.0824622
Histone 1, H2bn, isoform CRA_b OS=Homo sapiens GN=HIST1H2BN PE=1 SV=1	HIST1H2BN	U3KQK0	10.54	18.792	166	46.988	10	3	14000000000	54	48.7952	13	3	15000000000	51	105	0.0824622
E3 ubiquitin-protein ligase TRIM21 OS=Homo sapiens GN=TRIM21 PE=1 SV=1	TRIM21	P19474	6.38	54.135	475	47.1579	18	18	550000000	39	49.8947	19	19	620000000	37	76	0.0759489
Serum albumin OS=Homo sapiens GN=ALB PE=1 SV=2	ALB	P02768	6.28	69.321	609	10.6732	7	7	26000000000	65	12.6437	8	8	24000000000	62	127	0.0681715
Histone H1.2 OS=Homo sapiens GN=HIST1H1C PE=1 SV=2	HIST1H1C	P16403	10.93	21.352	213	44.1315	17	7	1900000000	24	38.0282	15	5	1700000000	23	47	0.0614005
Heterogeneous nuclear ribonucleoproteins C1/C2 OS=Homo sapiens GN=HNRNPC PE=1 SV=4	HNRNPC	P07910	5.08	33.65	306	35.9477	14	14	690000000	27	34.3137	13	13	660000000	26	53	0.0544478
Isoform 2 of Heterogeneous nuclear ribonucleoprotein K OS=Homo sapiens GN=HNRNPK	HNRNPK	P61978-2	5.33	50.996	464	49.1379	20	1	670000000	56	60.5603	26	2	580000000	54	110	0.0524674
Interleukin enhancer-binding factor 3 OS=Homo sapiens GN=ILF3 PE=1 SV=3	ILF3	Q12906	8.76	95.279	894	27.0694	19	19	150000000	31	36.0179	22	22	130000000	30	61	0.0473057
Glyceraldehyde-3-phosphate dehydrogenase OS=Homo sapiens GN=GAPDH PE=1 SV=3	GAPDH	P04406	8.46	36.03	335	55.5224	14	14	450000000	37	50.7463	14	14	350000000	36	73	0.0395284
Actin, cytoplasmic 1 OS=Homo sapiens GN=ACTB PE=1 SV=1	ACTB	P60709	5.48	41.71	375	66.1333	20	10	7100000000	126	72.2667	23	12	6600000000	123	249	0.0347654
Isoform 3 of Heterogeneous nuclear ribonucleoprotein K OS=Homo sapiens GN=HNRNPK	HNRNPK	P61978-3	5.54	48.532	440	46.3636	20	1	670000000	52	58.4091	25	1	580000000	51	103	0.0280144
Heterogeneous nuclear ribonucleoproteins A2/B1 OS=Homo sapiens GN=HNRNPA2B1 PE=1 SV=2	HNRNPA2B1	P22626	8.95	37.407	353	62.8895	26	22	830000000	67	68.272	26	24	820000000	66	133	0.0216951
Protein IGKV2D-24 (Fragment) OS=Homo sapiens GN=IGKV2D-24 PE=1 SV=1	IGKV2D-24	A0A075B6R9	8.87	13.071	120	7.5	1	1	21000000	1	9.16667	1	1	35000000	1	2	0
Heterogeneous nuclear ribonucleoprotein M OS=Homo sapiens GN=HNRNPM PE=1 SV=1	HNRNPM	M0R0Y6	8.6	10.732	99	11.1111	1	1	18000000	1	11.1111	1	1	17000000	1	2	0
Serine/arginine-rich splicing factor 10 OS=Homo sapiens GN=SRSF10 PE=1 SV=1	SRSF10	O75494	11.27	31.282	262	19.8473	4	4	43000000	5	19.8473	3	3	41000000	5	10	0
Skin-specific protein 32 OS=Homo sapiens GN=XP32 PE=1 SV=1	XP32	Q5T750	7.97	26.219	250	11.6	3	3	18000000	4	13.6	3	3	15000000	4	8	0
Isoform 4 of Caldesmon OS=Homo sapiens GN=CALD1	CALD1	Q05682-4	6.37	62.626	538	7.43494	3	3	18000000	3	6.3197	3	3	14000000	3	6	0
Enhancer of rudimentary homolog OS=Homo sapiens GN=ERH PE=1 SV=1	ERH	P84090	5.92	12.251	104	26.9231	2	2	120000000	2	26.9231	2	2	68000000	2	4	0
High mobility group nucleosome-binding domain-containing protein 4 OS=Homo sapiens GN=HMGN4 PE=1 SV=3	HMGN4	O00479	10.48	9.533	90	12.2222	1	1	9900000	1	12.2222	1	1	9800000	1	2	0
Protein IGKV2D-29 (Fragment) OS=Homo sapiens GN=IGKV2D-29 PE=1 SV=1	IGKV2D-29	A0A075B6S2	7.12	13.135	120	16.6667	2	2	5400000000	10	16.6667	2	2	5300000000	10	20	0
Immunoglobulin lambda-like polypeptide 5 OS=Homo sapiens GN=IGLL5 PE=1 SV=1	IGLL5	A0A087WWC9	7.09	24.668	231	3.4632	1	1	150000000	3	3.4632	1	1	120000000	3	6	0
U4/U6.U5 small nuclear ribonucleoprotein 27 kDa protein OS=Homo sapiens GN=SNRNP27 PE=1 SV=1	SNRNP27	B8ZZ98	11.46	19.426	158	6.96203	1	1	11000000	1	6.96203	1	1	8700000	1	2	0
60S ribosomal protein L34 OS=Homo sapiens GN=RPL34 PE=1 SV=3	RPL34	P49207	11.47	13.284	117	16.2393	3	3	22000000	3	15.3846	3	3	24000000	3	6	0
Isoform 3 of Chromatin modification-related protein MEAF6 OS=Homo sapiens GN=MEAF6	MEAF6	Q9HAF1-3	8.28	22.741	201	7.46269	1	1	330000	1	7.46269	1	1	240000	1	2	0
Elongation factor 1-beta OS=Homo sapiens GN=EEF1B2 PE=1 SV=3	EEF1B2	P24534	4.67	24.748	225	24.8889	3	3	48000000	3	6.66667	1	1	34000000	3	6	0
Calpain-1 catalytic subunit OS=Homo sapiens GN=CAPN1 PE=1 SV=1	CAPN1	P07384	5.67	81.838	714	1.40056	1	1	10000000	1	1.40056	1	1	11000000	1	2	0
Small nuclear ribonucleoprotein F OS=Homo sapiens GN=SNRPF PE=1 SV=1	SNRPF	P62306	4.67	9.719	86	15.1163	1	1	5600000	1	15.1163	1	1	4400000	1	2	0
60S ribosomal protein L15 OS=Homo sapiens GN=RPL15 PE=1 SV=2	RPL15	P61313	11.62	24.131	204	20.5882	3	3	71000000	7	20.5882	3	3	35000000	7	14	0
40S ribosomal protein S25 OS=Homo sapiens GN=RPS25 PE=1 SV=1	RPS25	E9PQK3	10.13	4.35	39	17.9487	1	1		1	20.5128	1	1	14000000	1	2	0
60S acidic ribosomal protein P1 OS=Homo sapiens GN=RPLP1 PE=1 SV=1	RPLP1	P05386	4.32	11.507	114	14.0351	1	1	130000000	1	14.0351	1	1	57000000	1	2	0
Dihydrolipoyllysine-residue acetyltransferase component of pyruvate dehydrogenase complex, mitochondrial OS=Homo sapiens GN=DLAT PE=1 SV=3	DLAT	P10515	7.84	68.953	647	2.31839	1	1	4500000	1	2.31839	1	1	8000000	1	2	0
Beta-catenin-like protein 1 OS=Homo sapiens GN=CTNNBL1 PE=1 SV=1	CTNNBL1	A0A087WUB9	5.02	65.661	568	1.93662	1	1	2700000	1	1.93662	1	1	2900000	1	2	0
Isoform 3 of Cleavage and polyadenylation specificity factor subunit 7 OS=Homo sapiens GN=CPSF7	CPSF7	Q8N684-3	8.87	56.341	514	8.75486	4	4	9500000	4	8.36576	4	4	8200000	4	8	0
Splicing factor 3A subunit 2 OS=Homo sapiens GN=SF3A2 PE=1 SV=2	SF3A2	Q15428	9.64	49.224	464	6.89655	3	3	9300000	3	6.89655	3	3	9300000	3	6	0
mRNA export factor OS=Homo sapiens GN=RAE1 PE=1 SV=1	RAE1	P78406	7.83	40.942	368	2.44565	1	1	9600000	1	2.44565	1	1	3700000	1	2	0
Protein disulfide-isomerase A4 OS=Homo sapiens GN=PDIA4 PE=1 SV=2	PDIA4	P13667	5.07	72.887	645	5.27132	3	3	47000000	3	5.27132	3	3	19000000	3	6	0
Protein deglycase DJ-1 OS=Homo sapiens GN=PARK7 PE=1 SV=2	PARK7	Q99497	6.79	19.878	189	8.46561	1	1	46000000	2	8.46561	1	1	44000000	2	4	0
Signal transducer and activator of transcription 3 OS=Homo sapiens GN=STAT3 PE=1 SV=2	STAT3	P40763	6.3	88.011	770	3.37662	1	1		2	3.37662	1	1	6800000	2	4	0
Isoform 2 of Tumor suppressor p53-binding protein 1 OS=Homo sapiens GN=TP53BP1	TP53BP1	Q12888-2	4.7	213.985	1977	0.505817	1	1		1	1.1128	1	1		1	2	0
Nucleoporin NUP53 OS=Homo sapiens GN=NUP35 PE=1 SV=1	NUP35	F8WCF5	7.18	13.918	136	13.9706	1	1		1	13.9706	1	1		1	2	0
Nucleolar complex protein 2 homolog OS=Homo sapiens GN=NOC2L PE=1 SV=4	NOC2L	Q9Y3T9	5.62	84.866	749	2.67023	2	2	11000000	2	3.20427	2	2	6000000	2	4	0
Midkine OS=Homo sapiens GN=MDK PE=1 SV=1	MDK	E9PLM6	9.91	16.915	156	6.41026	1	1	5100000	1	6.41026	1	1	3500000	1	2	0
Isoform 2 of Peroxisomal multifunctional enzyme type 2 OS=Homo sapiens GN=HSD17B4	HSD17B4	P51659-2	8.76	82.973	761	3.54796	1	1	20000000	1	2.1025	1	1		1	2	0
Ig gamma-2 chain C region OS=Homo sapiens GN=IGHG2 PE=1 SV=2	IGHG2	P01859	7.59	35.878	326	3.98773	2	2	820000000	11	8.28221	3	3	610000000	11	22	0
Heterogeneous nuclear ribonucleoprotein F OS=Homo sapiens GN=HNRNPF PE=1 SV=3	HNRNPF	P52597	5.58	45.643	415	34.9398	7	5	240000000	13	29.1566	7	5	220000000	13	26	0
SWI/SNF related, matrix associated, actin dependent regulator of chromatin, subfamily b, member 1, isoform CRA_c OS=Homo sapiens GN=SMARCB1 PE=1 SV=1	SMARCB1	G5E975	5.76	45.022	394	3.29949	1	1	62000000	1	4.31472	1	1		1	2	0
PHD finger-like domain-containing protein 5A OS=Homo sapiens GN=PHF5A PE=1 SV=1	PHF5A	Q7RTV0	8.41	12.397	110	11.8182	1	1	14000000	1	11.8182	1	1	12000000	1	2	0
Isoform Beta of Nucleolar and coiled-body phosphoprotein 1 OS=Homo sapiens GN=NOLC1	NOLC1	Q14978-2	9.47	74.702	709	11.5656	8	8	45000000	8	12.835	8	8	61000000	8	16	0
Complement component C8 gamma chain OS=Homo sapiens GN=C8G PE=1 SV=3	C8G	P07360	8.31	22.264	202	8.91089	2	2	24000000	2	8.91089	2	2	26000000	2	4	0
Nuclear pore complex protein Nup155 OS=Homo sapiens GN=NUP155 PE=1 SV=1	NUP155	E9PF10	6.3	148	1327	1.28109	1	1	2100000	2	1.73323	2	2	6100000	2	4	0
Paired mesoderm homeobox protein 2A OS=Homo sapiens GN=PHOX2A PE=1 SV=2	PHOX2A	O14813	8.76	29.635	284	16.1972	3	3	32000000	3	9.85915	3	3	19000000	3	6	0
40S ribosomal protein S5 OS=Homo sapiens GN=RPS5 PE=1 SV=1	RPS5	M0QZN2	8.48	14.754	134	29.1045	3	3	310000000	7	29.1045	3	3	290000000	7	14	0
40S ribosomal protein S10 OS=Homo sapiens GN=RPS10 PE=1 SV=1	RPS10	P46783	10.15	18.886	165	24.2424	4	4	230000000	6	18.7879	3	3	320000000	6	12	0
ADP-ribosylation factor-like protein 6-interacting protein 4 OS=Homo sapiens GN=ARL6IP4 PE=1 SV=2	ARL6IP4	Q66PJ3	10.93	44.888	421	4.51306	1	1	30000000	1	4.51306	1	1	38000000	1	2	0
Microtubule-associated protein 1A OS=Homo sapiens GN=MAP1A PE=1 SV=1	MAP1A	E9PGC8	4.93	331.055	3041	0.328839	1	1	91000000	1	0.328839	1	1	8900000	1	2	0
IK cytokine, down-regulator of HLA II, isoform CRA_a OS=Homo sapiens GN=IK PE=1 SV=1	IK	A0A087X1R5	6.86	65.614	557	1.79533	1	1	18000000	1	1.79533	1	1	13000000	1	2	0
60S ribosomal protein L5 OS=Homo sapiens GN=RPL5 PE=1 SV=3	RPL5	P46777	9.72	34.341	297	12.4579	3	3	30000000	3	12.4579	3	3	19000000	3	6	0
CD99 antigen OS=Homo sapiens GN=CD99 PE=1 SV=1	CD99	P14209	4.75	18.836	185	5.40541	1	1	9400000	1	5.40541	1	1	7200000	1	2	0
Protein IGHV3-49 (Fragment) OS=Homo sapiens GN=IGHV3-49 PE=1 SV=1	IGHV3-49	A0A0A0MS15	8.62	13.048	119	9.2437	1	1	15000000	1	9.2437	1	1	18000000	1	2	0
Splicing factor 3B subunit 1 OS=Homo sapiens GN=SF3B1 PE=1 SV=3	SF3B1	O75533	7.09	145.738	1304	15.4908	14	14	68000000	19	15.2607	14	14	40000000	19	38	0
WD40 repeat-containing protein SMU1 OS=Homo sapiens GN=SMU1 PE=1 SV=2	SMU1	Q2TAY7	7.18	57.507	513	14.8148	6	6	24000000	6	11.6959	6	6	14000000	6	12	0
Lactotransferrin OS=Homo sapiens GN=LTF PE=1 SV=6	LTF	P02788	8.12	78.132	710	1.26761	1	1	14000000	1	1.26761	1	1	91000000	1	2	0
Transitional endoplasmic reticulum ATPase OS=Homo sapiens GN=VCP PE=1 SV=4	VCP	P55072	5.26	89.266	806	19.3548	10	10	16000000	10	15.8809	9	9	27000000	10	20	0
RNA-binding protein 25 OS=Homo sapiens GN=RBM25 PE=1 SV=3	RBM25	P49756	6.32	100.124	843	5.69395	3	3	32000000	4	5.69395	3	3	12000000	4	8	0
Isoform 3 of Nuclear pore complex protein Nup153 OS=Homo sapiens GN=NUP153	NUP153	P49790-3	8.84	157.24	1506	0.863214	1	1	1800000	1	1.19522	1	1		1	2	0
Cold inducible RNA binding protein, isoform CRA_c OS=Homo sapiens GN=CIRBP PE=1 SV=1	CIRBP	D6W5Y5	9.61	31.898	297	3.7037	1	1	21000000	1	3.7037	1	1	21000000	1	2	0
Thioredoxin OS=Homo sapiens GN=TXN PE=1 SV=3	TXN	P10599	4.92	11.73	105	20.9524	2	2	270000000	3	32.381	3	3	150000000	3	6	0
Hypoxia up-regulated protein 1 OS=Homo sapiens GN=HYOU1 PE=1 SV=1	HYOU1	K7EQK2	5.73	75.309	678	1.32743	1	1	8900000	1	1.32743	1	1	13000000	1	2	0
Vitronectin OS=Homo sapiens GN=VTN PE=1 SV=1	VTN	P04004	5.8	54.271	478	3.13808	1	1		1	3.13808	1	1		1	2	0
Spliceosome-associated protein CWC15 homolog OS=Homo sapiens GN=CWC15 PE=1 SV=2	CWC15	Q9P013	5.71	26.608	229	4.80349	1	1	5800000	1	4.80349	1	1	5900000	1	2	0
Ran GTPase-activating protein 1 OS=Homo sapiens GN=RANGAP1 PE=1 SV=1	RANGAP1	P46060	4.68	63.502	587	2.21465	1	1		1	2.21465	1	1	10000000	1	2	0
Probable ATP-dependent RNA helicase DDX27 OS=Homo sapiens GN=DDX27 PE=1 SV=2	DDX27	Q96GQ7	9.28	89.779	796	1.13065	1	1		1	1.13065	1	1		1	2	0
Isoform 2 of Transgelin-2 OS=Homo sapiens GN=TAGLN2	TAGLN2	P37802-2	8.25	24.438	220	8.63636	2	2	21000000	2	8.63636	2	2	30000000	2	4	0
Prostaglandin E synthase 3 OS=Homo sapiens GN=PTGES3 PE=1 SV=1	PTGES3	Q15185	4.54	18.685	160	8.125	1	1	13000000	1	8.125	1	1	8300000	1	2	0
H/ACA ribonucleoprotein complex subunit 1 OS=Homo sapiens GN=GAR1 PE=1 SV=1	GAR1	Q9NY12	10.92	22.334	217	12.4424	2	2	21000000	2	12.4424	2	2	51000000	2	4	0
Keratin-associated protein 11-1 OS=Homo sapiens GN=KRTAP11-1 PE=1 SV=1	KRTAP11-1	Q8IUC1	7.9	17.074	163	6.74847	1	1	17000000	1	6.74847	1	1	43000000	1	2	0
Isoform 3 of Transcriptional repressor p66-alpha OS=Homo sapiens GN=GATAD2A	GATAD2A	Q86YP4-3	9.94	68.092	634	1.73502	1	1	9400000	1	1.73502	1	1	7900000	1	2	0
Homeobox protein TGIF2LX OS=Homo sapiens GN=TGIF2LX PE=1 SV=1	TGIF2LX	Q8IUE1	9.14	26.659	241	3.3195	1	1	270000000	1	3.3195	1	1	340000000	1	2	0
Isoform 2 of Ribose-phosphate pyrophosphokinase 2 OS=Homo sapiens GN=PRPS2	PRPS2	P11908-2	6.46	35.032	321	3.73832	1	1	10000000	1	3.73832	1	1	3000000	1	2	0
Heterogeneous nuclear ribonucleoprotein U-like protein 1 OS=Homo sapiens GN=HNRNPUL1 PE=1 SV=2	HNRNPUL1	Q9BUJ2	6.92	95.679	856	12.6168	7	7	18000000	8	7.94393	5	4	43000000	8	16	0
Chromobox protein homolog 3 OS=Homo sapiens GN=CBX3 PE=1 SV=4	CBX3	Q13185	5.33	20.798	183	36.0656	5	3	46000000	6	30.0546	4	2	32000000	6	12	0
Isoform HMG-R of High mobility group protein HMG-I/HMG-Y OS=Homo sapiens GN=HMGA1	HMGA1	P17096-3	11.75	19.682	179	18.4358	3	3	43000000	3	20.1117	3	1		3	6	0
26S proteasome non-ATPase regulatory subunit 2 OS=Homo sapiens GN=PSMD2 PE=1 SV=3	PSMD2	Q13200	5.2	100.136	908	0.881057	1	1	9900000	1	1.65198	1	1	1500000	1	2	0
Lamina-associated polypeptide 2, isoforms beta/gamma OS=Homo sapiens GN=TMPO PE=1 SV=2	TMPO	P42167	9.38	50.639	454	15.859	4	4	16000000	5	19.8238	5	5	13000000	5	10	0
Pumilio domain-containing protein KIAA0020 OS=Homo sapiens GN=KIAA0020 PE=1 SV=3	KIAA0020	Q15397	9.64	73.538	648	3.85802	1	1		2	6.48148	2	2	5300000	2	4	0
Ribosome biogenesis protein BRX1 homolog OS=Homo sapiens GN=BRIX1 PE=1 SV=2	BRIX1	Q8TDN6	9.92	41.375	353	18.1303	3	3	11000000	3	11.3314	3	3	18000000	3	6	0
Histone H3.1 OS=Homo sapiens GN=HIST1H3A PE=1 SV=2	HIST1H3A	P68431	11.12	15.394	136	36.7647	4	1	980000000	20	50.7353	6	1	1200000000	20	40	0
Isoform 2 of Dermcidin OS=Homo sapiens GN=DCD	DCD	P81605-2	7.97	12.406	121	9.09091	1	1	90000000	2	9.09091	1	1	130000000	2	4	0
Uncharacterized protein OS=Homo sapiens PE=1 SV=1	NOGENE	A0A0B4J2E5	6.2	102.386	919	1.74102	1	1	10000000	1	1.74102	1	1	10000000	1	2	0
Uncharacterized protein (Fragment) OS=Homo sapiens PE=4 SV=1	NOGENE	A0A087WWQ2	9.74	24.442	223	12.5	1	1		1	8.96861	1	1		1	2	0
Cytochrome c oxidase subunit 2 OS=Homo sapiens GN=MT-CO2 PE=1 SV=1	MT-CO2	P00403	4.82	25.548	227	4.40529	1	1	22000000	1	4.40529	1	1	15000000	1	2	0
Sister chromatid cohesion protein PDS5 homolog A OS=Homo sapiens GN=PDS5A PE=1 SV=1	PDS5A	Q29RF7	7.91	150.734	1337	0.897532	1	1	11000000	1	1.49589	1	1		1	2	0
Transaldolase OS=Homo sapiens GN=TALDO1 PE=1 SV=2	TALDO1	P37837	6.81	37.516	337	2.37389	1	1	4200000	1	2.67062	1	1		1	2	0
Nuclear ubiquitous casein and cyclin-dependent kinase substrate 1 OS=Homo sapiens GN=NUCKS1 PE=1 SV=1	NUCKS1	Q9H1E3	5.08	27.28	243	3.7037	1	1	39000000	1	3.7037	1	1	48000000	1	2	0
SCY1-like protein 2 OS=Homo sapiens GN=SCYL2 PE=1 SV=1	SCYL2	Q6P3W7	8.22	103.642	929	1.93757	1	1	2500000	5	1.93757	1	1	9100000	5	10	0
SAFB-like transcription modulator OS=Homo sapiens GN=SLTM PE=1 SV=2	SLTM	Q9NWH9	7.87	117.079	1034	1.06383	1	1	2200000	1	0.967118	1	1		1	2	0
60S ribosomal protein L13 OS=Homo sapiens GN=RPL13 PE=1 SV=4	RPL13	P26373	11.65	24.247	211	28.91	6	6	77000000	6	27.4882	6	6	64000000	6	12	0
Protein IGKV3D-20 (Fragment) OS=Homo sapiens GN=IGKV3D-20 PE=4 SV=1	IGKV3D-20	A0A0C4DH25	4.59	12.507	116	7.75862	1	1	7900000	1	7.75862	1	1	10000000	1	2	0
Prohibitin-2 OS=Homo sapiens GN=PHB2 PE=1 SV=2	PHB2	J3KPX7	9.83	33.219	298	40.604	11	11	67000000	13	38.5906	10	10	68000000	13	26	0
Isoform 9 of Deleted in malignant brain tumors 1 protein OS=Homo sapiens GN=DMBT1	DMBT1	Q9UGM3-9	5.4	124.373	1133	1.85349	1	1		1	1.85349	1	1		1	2	0
Keratin, type I cytoskeletal 23 OS=Homo sapiens GN=KRT23 PE=1 SV=2	KRT23	Q9C075	6.54	48.101	422	3.79147	2	1	210000000	3	9.47867	3	2	230000000	3	6	0
60S ribosomal protein L29 OS=Homo sapiens GN=RPL29 PE=1 SV=2	RPL29	P47914	11.66	17.741	159	9.43396	1	1	130000000	1	9.43396	1	1	64000000	1	2	0
Uncharacterized protein OS=Homo sapiens PE=2 SV=1	NOGENE	B4E1Z4	7.18	140.853	1266	1.4218	1	1	66000000	1	1.4218	1	1		1	2	0
Stress-70 protein, mitochondrial OS=Homo sapiens GN=HSPA9 PE=1 SV=2	HSPA9	P38646	6.16	73.635	679	6.92194	4	4	18000000	4	4.71281	3	3	5400000	4	8	0
Ig gamma-1 chain C region OS=Homo sapiens GN=IGHG1 PE=1 SV=1	IGHG1	A0A087WV47	7.55	51.121	466	2.31579	1	1	5300000	1	2.57511	1	1	16000000	1	2	0
Transmembrane protein 33 OS=Homo sapiens GN=TMEM33 PE=1 SV=2	TMEM33	P57088	9.7	27.96	247	7.69231	2	2	32000000	2	7.69231	2	2	36000000	2	4	0
Replication factor C subunit 3 OS=Homo sapiens GN=RFC3 PE=1 SV=2	RFC3	P40938	8.34	40.53	356	3.93258	1	1	5100000	1	3.93258	1	1	1500000	1	2	0
Nucleolar complex protein 3 homolog OS=Homo sapiens GN=NOC3L PE=1 SV=1	NOC3L	Q8WTT2	9.17	92.49	800	5.875	3	3	12000000	3	6.5	3	3	12000000	3	6	0
Eukaryotic translation initiation factor 1A, Y-chromosomal OS=Homo sapiens GN=EIF1AY PE=1 SV=4	EIF1AY	O14602	5.24	16.432	144	8.33333	1	1	11000000	1	4.86111	1	1	19000000	1	2	0
WD repeat-containing protein 36 OS=Homo sapiens GN=WDR36 PE=1 SV=1	WDR36	Q8NI36	7.53	105.255	951	1.47213	1	1	2100000	1	1.47213	1	1		1	2	0
Beta-2-glycoprotein 1 OS=Homo sapiens GN=APOH PE=1 SV=3	APOH	P02749	7.97	38.273	345	2.6087	1	1		1	2.6087	1	1	61000000	1	2	0
Isoform 4 of LIM domain and actin-binding protein 1 OS=Homo sapiens GN=LIMA1	LIMA1	Q9UHB6-4	6.76	85.171	760	1.44737	1	1	7200000	1	1.44737	1	1	4400000	1	2	0
Very-long-chain enoyl-CoA reductase OS=Homo sapiens GN=TECR PE=1 SV=1	TECR	M0R3C3	9.2	11.766	105	25.7143	2	2	28000000	3	25.7143	2	2	30000000	3	6	0
Nuclear pore complex protein Nup85 OS=Homo sapiens GN=NUP85 PE=1 SV=1	NUP85	J3KT10	5.54	70.133	611	1.30933	1	1	13000000	1	1.30933	1	1	4600000	1	2	0
Ribosome production factor 2 homolog OS=Homo sapiens GN=RPF2 PE=1 SV=2	RPF2	Q9H7B2	9.99	35.56	306	4.24837	1	1	4500000	1	4.24837	1	1		1	2	0
Hemoglobin subunit alpha OS=Homo sapiens GN=HBA1 PE=1 SV=2	HBA1	P69905	8.68	15.248	142	4.92958	1	1	18000000	1	10.5634	1	1	3900000	1	2	0
Serine/arginine-rich splicing factor 5 OS=Homo sapiens GN=SRSF5 PE=1 SV=1	SRSF5	Q13243	11.59	31.245	272	5.14706	1	1		1	5.14706	1	1	2200000	1	2	0
SWI/SNF-related matrix-associated actin-dependent regulator of chromatin subfamily A member 5 OS=Homo sapiens GN=SMARCA5 PE=1 SV=1	SMARCA5	O60264	8.09	121.828	1052	2.6616	3	3	12000000	3	2.47148	3	3	6400000	3	6	0
Membrane primary amine oxidase OS=Homo sapiens GN=AOC3 PE=1 SV=3	AOC3	Q16853	6.52	84.568	763	2.22805	2	2	31000000	2	2.22805	2	2	34000000	2	4	0
Ig kappa chain V-IV region B17 OS=Homo sapiens PE=2 SV=1	NOGENE	P06314	6.58	14.956	134	6.71642	1	1	56000000	1	6.71642	1	1	77000000	1	2	0
Histidine ammonia-lyase OS=Homo sapiens GN=HAL PE=1 SV=1	HAL	P42357	6.95	72.652	657	1.21766	1	1	2500000	1	1.21766	1	1	12000000	1	2	0
RNA-binding protein 14 OS=Homo sapiens GN=RBM14 PE=1 SV=2	RBM14	Q96PK6	9.67	69.449	669	14.7982	7	7	40000000	11	15.2466	8	8	28000000	11	22	0
Dolichol-phosphate mannosyltransferase subunit 1 (Fragment) OS=Homo sapiens GN=DPM1 PE=1 SV=1	DPM1	H0Y368	9.14	33.307	295	28.1356	6	6	56000000	8	29.4915	6	6	55000000	8	16	0
Isoform 6 of Latrophilin-2 OS=Homo sapiens GN=LPHN2	LPHN2	O95490-6	6.34	164.961	1474	0.542741	1	1	44000000	1	0.542741	1	1	66000000	1	2	0
Serine/arginine-rich splicing factor 7 OS=Homo sapiens GN=SRSF7 PE=1 SV=1	SRSF7	Q16629	11.82	27.35	238	29.8319	7	6	100000000	10	34.4538	8	7	200000000	10	20	0
MKI67 FHA domain-interacting nucleolar phosphoprotein OS=Homo sapiens GN=NIFK PE=1 SV=1	NIFK	Q9BYG3	9.88	34.201	293	9.21502	2	2	5200000	2	9.21502	2	2	4100000	2	4	0
Hemoglobin subunit delta OS=Homo sapiens GN=HBD PE=1 SV=2	HBD	P02042	8.05	16.045	147	6.80272	1	1	120000000	1	6.80272	1	1	130000000	1	2	0
5'-3' exoribonuclease 2 OS=Homo sapiens GN=XRN2 PE=1 SV=1	XRN2	Q9H0D6	7.47	108.513	950	3.05263	2	2	14000000	2	3.05263	2	2	17000000	2	4	0
RNA-binding protein 39 OS=Homo sapiens GN=RBM39 PE=1 SV=2	RBM39	Q14498	10.1	59.343	530	18.6792	8	8	120000000	11	27.9245	10	10	100000000	11	22	0
High mobility group protein B3 OS=Homo sapiens GN=HMGB3 PE=1 SV=4	HMGB3	O15347	8.37	22.965	200	4	1	1	16000000	1	4	1	1	23000000	1	2	0
Barrier-to-autointegration factor OS=Homo sapiens GN=BANF1 PE=1 SV=1	BANF1	O75531	6.09	10.052	89	13.4831	1	1		1	8.98876	1	1	2400000	1	2	0
Apolipoprotein E OS=Homo sapiens GN=APOE PE=1 SV=1	APOE	P02649	5.73	36.132	317	5.36278	2	2	46000000	2	5.36278	2	2	53000000	2	4	0
Eukaryotic translation initiation factor 6 OS=Homo sapiens GN=EIF6 PE=1 SV=1	EIF6	P56537	4.68	26.582	245	7.34694	1	1		3	7.34694	1	1	7100000	3	6	0
Apoptosis inhibitor 5 OS=Homo sapiens GN=API5 PE=1 SV=3	API5	Q9BZZ5	7.34	58.968	524	5.53435	2	2	7400000	2	5.53435	2	2	8600000	2	4	0
Isoform Short of Heterogeneous nuclear ribonucleoprotein U OS=Homo sapiens GN=HNRNPU	HNRNPU	Q00839-2	5.78	88.924	806	37.9653	27	1	760000000	61	35.2357	27	1	670000000	61	122	0
Transformer-2 protein homolog beta OS=Homo sapiens GN=TRA2B PE=1 SV=1	TRA2B	P62995	11.25	33.646	288	19.4444	4	4	25000000	6	9.02778	2	1	39000000	6	12	0
Isoform 6 of Cellular nucleic acid-binding protein OS=Homo sapiens GN=CNBP	CNBP	P62633-6	7.58	19.678	179	40.7821	6	6	54000000	10	45.8101	7	7	26000000	10	20	0
Histone H2B type 1-O OS=Homo sapiens GN=HIST1H2BO PE=1 SV=3	HIST1H2BO	P23527	10.32	13.898	126	61.9048	10	1	14000000000	48	64.2857	13	1	15000000000	48	96	0
Developmentally-regulated GTP-binding protein 1 OS=Homo sapiens GN=DRG1 PE=1 SV=1	DRG1	Q9Y295	8.9	40.517	367	2.99728	1	1	10000000	1	4.08719	1	1		1	2	0
Eukaryotic initiation factor 4A-I OS=Homo sapiens GN=EIF4A1 PE=1 SV=1	EIF4A1	J3QQP0	6.29	10.659	95	16.8421	1	0	360000000	6	16.8421	1	0	60000000	6	12	0
Ig kappa chain C region OS=Homo sapiens GN=IGKC PE=1 SV=1	IGKC	A0A087X130	6.32	25.12	231	3.8961	1	1	2600000000	2	3.8961	1	1	2800000000	2	4	0
Small nuclear ribonucleoprotein Sm D3 OS=Homo sapiens GN=SNRPD3 PE=1 SV=1	SNRPD3	H3BT13	4.94	6.901	62	33.871	1	1	17000000	2	33.871	1	1	8200000	2	4	0
Isoform 2 of High mobility group nucleosome-binding domain-containing protein 3 OS=Homo sapiens GN=HMGN3	HMGN3	Q15651-2	10.26	8.373	77	12.987	1	1	1900000	1	10.3896	1	1	5400000	1	2	0
FACT complex subunit SSRP1 OS=Homo sapiens GN=SSRP1 PE=1 SV=1	SSRP1	Q08945	6.87	81.024	709	8.46262	5	5	58000000	5	7.47532	5	5	53000000	5	10	0
Histone deacetylase complex subunit SAP18 OS=Homo sapiens GN=SAP18 PE=1 SV=1	SAP18	X6RAL5	9.8	19.514	172	7.55814	1	1	7900000	1	5.23256	1	1	120000000	1	2	0
60S ribosomal protein L37a OS=Homo sapiens GN=RPL37A PE=1 SV=2	RPL37A	P61513	10.43	10.268	92	13.0435	1	1	15000000	1	9.78261	1	1	21000000	1	2	0
Ribosome-binding protein 1 (Fragment) OS=Homo sapiens GN=RRBP1 PE=1 SV=1	RRBP1	A2A2S5	9.89	31.702	300	3.33333	1	1	5100000	1	3.33333	1	1	6600000	1	2	0
Complement C4-A OS=Homo sapiens GN=C4A PE=1 SV=2	C4A	P0C0L4	7.08	192.664	1744	1.54817	3	3	22000000	4	2.35092	4	4	26000000	4	8	0
Isochorismatase domain-containing protein 1 OS=Homo sapiens GN=ISOC1 PE=1 SV=3	ISOC1	Q96CN7	7.39	32.216	298	8.72483	2	2	25000000	2	8.72483	2	2	9300000	2	4	0
SRA stem-loop-interacting RNA-binding protein, mitochondrial OS=Homo sapiens GN=SLIRP PE=1 SV=1	SLIRP	A0A087WUN7	10.23	10.346	92	10.8696	1	1	24000000	1	10.8696	1	1	20000000	1	2	0
Heterogeneous nuclear ribonucleoprotein U OS=Homo sapiens GN=HNRNPU PE=1 SV=6	HNRNPU	Q00839	6	90.528	825	38.7879	28	2	760000000	61	36.6061	29	3	670000000	62	123	-0.023459
Probable ATP-dependent RNA helicase DDX5 OS=Homo sapiens GN=DDX5 PE=1 SV=1	DDX5	P17844	8.92	69.105	614	41.0423	20	14	210000000	34	42.8339	20	15	190000000	35	69	-0.0418202
Histone H2B type 3-B OS=Homo sapiens GN=HIST3H2BB PE=1 SV=3	HIST3H2BB	Q8N257	10.32	13.9	126	64.2857	9	1	13000000000	45	72.2222	13	2	14000000000	47	92	-0.0627358
Isoform 3 of Drebrin OS=Homo sapiens GN=DBN1	DBN1	Q16643-3	4.51	76.253	695	18.2734	11	11	54000000	16	15.2518	8	8	93000000	17	33	-0.0874628
HCG2001850, isoform CRA_a OS=Homo sapiens GN=NME1-NME2 PE=1 SV=1	NME1-NME2	Q32Q12	8.48	32.621	292	42.8082	7	3	290000000	15	44.863	7	3	280000000	16	31	-0.0931094
60S ribosomal protein L38 OS=Homo sapiens GN=RPL38 PE=1 SV=2	RPL38	P63173	10.1	8.213	70	50	6	6	240000000	14	50	6	6	320000000	15	29	-0.0995357
Nucleophosmin OS=Homo sapiens GN=NPM1 PE=1 SV=2	NPM1	P06748	4.78	32.555	294	37.7551	10	10	630000000	38	43.8776	14	14	640000000	41	79	-0.109624
rRNA 2'-O-methyltransferase fibrillarin OS=Homo sapiens GN=FBL PE=1 SV=2	FBL	P22087	10.18	33.763	321	38.0062	9	9	95000000	12	36.4486	8	8	70000000	13	25	-0.115477
THO complex subunit 4 OS=Homo sapiens GN=ALYREF PE=1 SV=1	ALYREF	E9PB61	11.05	27.541	264	33.3333	5	5	28000000	12	33.3333	5	5	46000000	13	25	-0.115477
Histone H4 OS=Homo sapiens GN=HIST1H4A PE=1 SV=2	HIST1H4A	P62805	11.36	11.36	103	61.165	13	13	2000000000	34	58.2524	13	13	2400000000	37	71	-0.121991
Keratin, type II cytoskeletal 1b OS=Homo sapiens GN=KRT77 PE=2 SV=3	KRT77	Q7Z794	5.99	61.864	578	8.99654	7	3	11000000000	56	10.5536	7	4	17000000000	61	117	-0.123382
60S ribosomal protein L9 OS=Homo sapiens GN=RPL9 PE=1 SV=1	RPL9	P32969	9.95	21.85	192	39.5833	5	5	120000000	11	33.8542	4	4	130000000	12	23	-0.125531
Heterogeneous nuclear ribonucleoprotein D-like OS=Homo sapiens GN=HNRNPDL PE=1 SV=3	HNRNPDL	O14979	9.57	46.409	420	13.8095	6	4	240000000	11	15.4762	8	6	180000000	12	23	-0.125531
Histone H2AX OS=Homo sapiens GN=H2AFX PE=1 SV=2	H2AFX	P16104	10.74	15.135	143	58.7413	7	1	12000000000	44	63.6364	9	2	13000000000	48	92	-0.125531
Nucleolar protein 58 OS=Homo sapiens GN=NOP58 PE=1 SV=1	NOP58	Q9Y2X3	8.92	59.541	529	24.5747	10	10	22000000	11	25.1418	10	10	34000000	12	23	-0.125531
Nucleolar RNA helicase 2 OS=Homo sapiens GN=DDX21 PE=1 SV=5	DDX21	Q9NR30	9.28	87.29	783	28.2248	17	16	89000000	21	26.0536	16	14	78000000	23	44	-0.131245
Actin, alpha cardiac muscle 1 OS=Homo sapiens GN=ACTC1 PE=1 SV=1	ACTC1	P68032	5.39	41.992	377	36.3395	12	2	3600000000	42	40.5836	14	3	3400000000	46	88	-0.131245
Non-histone chromosomal protein HMG-17 OS=Homo sapiens GN=HMGN2 PE=1 SV=3	HMGN2	P05204	9.99	9.387	90	57.7778	6	6	59000000	10	57.7778	7	7	74000000	11	21	-0.137504
Histone H2A type 1-B/E OS=Homo sapiens GN=HIST1H2AB PE=1 SV=2	HIST1H2AB	P04908	11.05	14.127	130	68.4615	9	3	15000000000	49	68.4615	10	3	17000000000	54	103	-0.140178
Histone H2A.Z OS=Homo sapiens GN=H2AFZ PE=1 SV=2	H2AFZ	P0C0S5	10.58	13.545	128	53.9062	6	4	10000000000	28	53.9062	6	4	11000000000	31	59	-0.146841
Isoform 2 of Heterogeneous nuclear ribonucleoprotein A/B OS=Homo sapiens GN=HNRNPAB	HNRNPAB	Q99729-2	6.95	35.945	332	24.6988	8	7	150000000	9	25	8	7	130000000	10	19	-0.152003
Prohibitin OS=Homo sapiens GN=PHB PE=1 SV=1	PHB	P35232	5.76	29.786	272	41.9118	8	8	42000000	9	40.8088	8	8	46000000	10	19	-0.152003
40S ribosomal protein S3 OS=Homo sapiens GN=RPS3 PE=1 SV=2	RPS3	P23396	9.66	26.671	243	66.6667	13	13	320000000	27	70.7819	15	15	270000000	30	57	-0.152003
78 kDa glucose-regulated protein OS=Homo sapiens GN=HSPA5 PE=1 SV=2	HSPA5	P11021	5.16	72.288	654	16.8196	9	7	180000000	9	16.3609	10	9	23000000	10	19	-0.152003
Core histone macro-H2A.2 OS=Homo sapiens GN=H2AFY2 PE=1 SV=3	H2AFY2	Q9P0M6	9.69	40.033	372	45.1613	11	10	80000000	18	42.2043	11	10	70000000	20	38	-0.152003
Peroxiredoxin-1 OS=Homo sapiens GN=PRDX1 PE=1 SV=1	PRDX1	A0A0A0MRQ5	8.72	10.67	97	61.8557	5	4	190000000	9	65.9794	6	3	120000000	10	19	-0.152003
Histone H2A type 2-A OS=Homo sapiens GN=HIST2H2AA3 PE=1 SV=3	HIST2H2AA3	Q6FI13	10.9	14.087	130	63.0769	8	3	15000000000	46	68.4615	11	4	17000000000	52	98	-0.176878
Histone H1.5 OS=Homo sapiens GN=HIST1H1B PE=1 SV=3	HIST1H1B	P16401	10.92	22.566	226	33.6283	14	11	1500000000	23	39.823	15	13	1400000000	26	49	-0.176878
Putative RNA-binding protein Luc7-like 2 OS=Homo sapiens GN=LUC7L2 PE=1 SV=2	LUC7L2	Q9Y383	10.01	46.486	392	27.0408	9	5	160000000	14	28.8265	10	6	200000000	16	30	-0.192645
Splicing factor 3B subunit 2 OS=Homo sapiens GN=SF3B2 PE=1 SV=2	SF3B2	Q13435	5.67	100.165	895	12.2905	10	10	29000000	14	18.2123	11	11	22000000	16	30	-0.192645
High mobility group protein B1 OS=Homo sapiens GN=HMGB1 PE=1 SV=3	HMGB1	P09429	5.74	24.878	215	26.5116	5	4	67000000	7	33.9535	7	6	78000000	8	15	-0.192645
Isoform 2 of Tropomyosin alpha-3 chain OS=Homo sapiens GN=TPM3	TPM3	P06753-2	4.78	29.015	248	55.6452	19	12	77000000	21	47.1774	16	9	71000000	24	45	-0.192645
ATP synthase subunit beta, mitochondrial OS=Homo sapiens GN=ATP5B PE=1 SV=3	ATP5B	P06576	5.4	56.525	529	13.9887	5	5	35000000	7	15.3119	5	5	64000000	8	15	-0.192645
Isoform 2 of Protein disulfide-isomerase A6 OS=Homo sapiens GN=PDIA6	PDIA6	Q15084-2	5.33	53.867	492	14.4309	5	5	80000000	6	10.9756	4	4	60000000	7	13	-0.222392
60S ribosomal protein L23 OS=Homo sapiens GN=RPL23 PE=1 SV=1	RPL23	J3KTJ3	10.14	8.894	81	33.3333	4	4	210000000	6	41.9753	5	5	200000000	7	13	-0.222392
Epiplakin OS=Homo sapiens GN=EPPK1 PE=1 SV=2	EPPK1	A0A075B730	5.6	552.791	5063	6.0241	6	5	90000000	6	9.38179	5	3	31000000	7	13	-0.222392
Histone H2A type 2-B OS=Homo sapiens GN=HIST2H2AB PE=1 SV=3	HIST2H2AB	Q8IUE6	10.89	13.987	130	64.6154	6	2	9400000000	27	70	8	2	10000000000	32	59	-0.245112
40S ribosomal protein S7 OS=Homo sapiens GN=RPS7 PE=1 SV=1	RPS7	B5MCP9	10.27	21.299	187	52.9412	9	9	540000000	25	56.6845	11	11	650000000	30	55	-0.263034
RNA-binding protein Raly OS=Homo sapiens GN=RALY PE=1 SV=1	RALY	Q9UKM9	9.17	32.444	306	31.6993	8	8	110000000	10	32.6797	9	9	100000000	12	22	-0.263034
Histone H1.4 OS=Homo sapiens GN=HIST1H1E PE=1 SV=2	HIST1H1E	P10412	11.03	21.852	219	39.726	13	3	1900000000	20	41.0959	16	5	1700000000	24	44	-0.263034
U5 small nuclear ribonucleoprotein 200 kDa helicase OS=Homo sapiens GN=SNRNP200 PE=1 SV=2	SNRNP200	O75643	6.06	244.353	2136	17.8839	23	23	54000000	34	18.118	26	26	32000000	41	75	-0.270089
ADP/ATP translocase 2 OS=Homo sapiens GN=SLC25A5 PE=1 SV=7	SLC25A5	P05141	9.69	32.831	298	29.8658	9	3	180000000	13	31.8792	9	2	230000000	16	29	-0.29956
Matrin-3 OS=Homo sapiens GN=MATR3 PE=1 SV=1	MATR3	B3KM87	5.86	56.701	509	25.1473	9	9	170000000	13	22.0039	9	9	200000000	16	29	-0.29956
Isoform 2 of Nucleoside diphosphate kinase A OS=Homo sapiens GN=NME1	NME1	P15531-2	5.58	19.641	177	35.0282	5	1	280000000	12	33.8983	5	1	280000000	15	27	-0.321928
H/ACA ribonucleoprotein complex subunit 4 OS=Homo sapiens GN=DKC1 PE=1 SV=3	DKC1	O60832	9.42	57.638	514	10.3113	3	3	23000000	4	12.8405	4	4	38000000	5	9	-0.321928
Isoform 2 of Chromatin target of PRMT1 protein OS=Homo sapiens GN=CHTOP	CHTOP	Q9Y3Y2-3	12.23	26.508	249	16.8675	3	3	18000000	4	11.6466	2	2	21000000	5	9	-0.321928
Ribosomal L1 domain-containing protein 1 OS=Homo sapiens GN=RSL1D1 PE=1 SV=3	RSL1D1	O76021	10.13	54.939	490	11.0204	4	4	22000000	4	10.2041	3	3	11000000	5	9	-0.321928
Fibrinogen beta chain OS=Homo sapiens GN=FGB PE=1 SV=2	FGB	P02675	8.27	55.892	491	14.2566	6	6	200000000	8	14.053	6	6	210000000	10	18	-0.321928
Histone H1.3 OS=Homo sapiens GN=HIST1H1D PE=1 SV=2	HIST1H1D	P16402	11.02	22.336	221	34.3891	13	5	1900000000	20	40.2715	17	7	1700000000	25	45	-0.321928
Myelin expression factor 2 OS=Homo sapiens GN=MYEF2 PE=1 SV=1	MYEF2	A0A0A0MR39	8.87	64.109	600	7.16667	4	4	5500000	4	8.33333	5	5	13000000	5	9	-0.321928
Protein SET OS=Homo sapiens GN=SET PE=1 SV=3	SET	Q01105	4.32	33.469	290	15.5172	2	2	26000000	4	20.3448	3	3	31000000	5	9	-0.321928
60S acidic ribosomal protein P2 OS=Homo sapiens GN=RPLP2 PE=1 SV=1	RPLP2	P05387	4.54	11.658	115	26.9565	2	2	130000000	4	26.9565	2	2	17000000	5	9	-0.321928
Histone H1.0 OS=Homo sapiens GN=H1F0 PE=1 SV=3	H1F0	P07305	10.84	20.85	194	32.4742	7	7	160000000	8	32.4742	7	7	210000000	10	18	-0.321928
Serine/arginine-rich splicing factor 3 OS=Homo sapiens GN=SRSF3 PE=1 SV=1	SRSF3	P84103	11.65	19.318	164	34.7561	8	7	360000000	19	40.2439	9	8	550000000	24	43	-0.337035
Keratin, type I cytoskeletal 27 OS=Homo sapiens GN=KRT27 PE=1 SV=2	KRT27	Q7Z3Y8	5.05	49.792	459	10.0218	6	2	3700000000	19	5.66449	4	1	6100000000	24	43	-0.337035
RNA-binding motif protein, X chromosome OS=Homo sapiens GN=RBMX PE=1 SV=3	RBMX	P38159	10.05	42.306	391	25.5754	11	11	140000000	15	34.0153	15	15	150000000	19	34	-0.341037
Interleukin enhancer-binding factor 2 OS=Homo sapiens GN=ILF2 PE=1 SV=2	ILF2	Q12905	5.26	43.035	390	34.6154	11	11	250000000	22	35.641	12	12	160000000	28	50	-0.347923
Alpha-2-macroglobulin OS=Homo sapiens GN=A2M PE=1 SV=3	A2M	P01023	6.46	163.188	1474	4.74898	7	7	280000000	14	4.74898	7	7	220000000	18	32	-0.36257
Splicing factor 3A subunit 3 OS=Homo sapiens GN=SF3A3 PE=1 SV=1	SF3A3	Q12874	5.38	58.812	501	12.9741	5	5	34000000	7	12.1756	5	5	22000000	9	16	-0.36257
Fibrinogen gamma chain OS=Homo sapiens GN=FGG PE=1 SV=1	FGG	C9JC84	5.63	52.304	461	9.76139	3	3	340000000	7	9.76139	3	3	340000000	9	16	-0.36257
Prelamin-A/C OS=Homo sapiens GN=LMNA PE=1 SV=1	LMNA	Q5TCI8	7.02	55.729	491	24.0326	13	12	180000000	17	28.5132	16	15	310000000	22	39	-0.371969
Histone H3.3 OS=Homo sapiens GN=H3F3A PE=1 SV=2	H3F3A	P84243	11.27	15.319	136	36.7647	4	1	980000000	10	50	6	2	1200000000	13	23	-0.378512
Isoform 2 of Heterogeneous nuclear ribonucleoprotein D0 OS=Homo sapiens GN=HNRNPD	HNRNPD	Q14103-2	8.1	36.249	336	23.2143	7	1	270000000	10	29.7619	10	1	240000000	13	23	-0.378512
Pyruvate kinase PKM OS=Homo sapiens GN=PKM PE=1 SV=4	PKM	P14618	7.84	57.9	531	41.6196	13	13	83000000	16	41.8079	14	14	82000000	21	37	-0.392317
Isoform 3 of L-lactate dehydrogenase A chain OS=Homo sapiens GN=LDHA	LDHA	P00338-3	8.43	39.812	361	32.133	11	9	1300000000	18	29.9169	10	9	1600000000	24	42	-0.415037
Serine/arginine repetitive matrix protein 1 OS=Homo sapiens GN=SRRM1 PE=1 SV=1	SRRM1	A9Z1X7	11.85	103.329	913	2.84775	2	2	9300000	3	5.80504	4	4	8600000	4	7	-0.415037
Corneodesmosin OS=Homo sapiens GN=CDSN PE=1 SV=1	CDSN	G8JLG2	8.44	51.575	529	5.10397	2	2	77000000	3	6.80529	3	3	130000000	4	7	-0.415037
ADP/ATP translocase 3 OS=Homo sapiens GN=SLC25A6 PE=1 SV=4	SLC25A6	P12236	9.74	32.845	298	24.8322	8	1	180000000	12	30.5369	9	2	230000000	16	28	-0.415037
Metastasis-associated protein MTA1 OS=Homo sapiens GN=MTA1 PE=1 SV=2	MTA1	Q13330	9.26	80.735	715	4.33566	3	3	11000000	3	6.57343	4	4	8100000	4	7	-0.415037
ADP/ATP translocase 1 OS=Homo sapiens GN=SLC25A4 PE=1 SV=4	SLC25A4	P12235	9.76	33.043	298	20.8054	6	1	140000000	9	21.8121	6	1	220000000	12	21	-0.415037
Poly [ADP-ribose] polymerase 1 OS=Homo sapiens GN=PARP1 PE=1 SV=4	PARP1	P09874	8.88	113.012	1014	20.1183	17	17	120000000	20	24.9507	20	20	120000000	27	47	-0.432959
Isoform 5 of RNA-binding protein EWS OS=Homo sapiens GN=EWSR1	EWSR1	Q01844-5	9.29	68.923	661	9.53101	4	4	36000000	11	11.9516	6	6	46000000	15	26	-0.447459
Heterogeneous nuclear ribonucleoprotein D0 OS=Homo sapiens GN=HNRNPD PE=1 SV=1	HNRNPD	Q14103	7.81	38.41	355	23.662	7	1	270000000	11	32.3944	11	2	240000000	15	26	-0.447459
Filaggrin OS=Homo sapiens GN=FLG PE=1 SV=3	FLG	P20930	9.25	434.922	4061	10.7609	15	15	29000000	19	12.2384	20	20	75000000	26	45	-0.452512
Cytoskeleton-associated protein 4 OS=Homo sapiens GN=CKAP4 PE=1 SV=2	CKAP4	Q07065	5.92	65.983	602	17.7741	7	7	20000000	8	20.7641	8	8	11000000	11	19	-0.459432
Filaggrin-2 OS=Homo sapiens GN=FLG2 PE=1 SV=1	FLG2	Q5D862	8.31	247.928	2391	17.6077	22	22	140000000	45	23.2957	27	27	200000000	62	107	-0.462343
ATP-dependent RNA helicase DDX18 OS=Homo sapiens GN=DDX18 PE=1 SV=2	DDX18	Q9NVP1	9.5	75.359	670	8.95522	5	5	10000000	5	13.5821	7	7	21000000	7	12	-0.485427
40S ribosomal protein S19 OS=Homo sapiens GN=RPS19 PE=1 SV=2	RPS19	P39019	10.32	16.051	145	50.3448	9	9	130000000	10	55.8621	11	11	140000000	14	24	-0.485427
60S ribosomal protein L35 OS=Homo sapiens GN=RPL35 PE=1 SV=2	RPL35	P42766	11.05	14.543	123	26.8293	4	4	56000000	5	26.8293	4	4	21000000	7	12	-0.485427
Keratin, type II cytoskeletal 71 OS=Homo sapiens GN=KRT71 PE=1 SV=3	KRT71	Q3SY84	6.61	57.256	523	10.1338	6	3	860000000	7	7.45698	4	1	2200000000	10	17	-0.514573
Nucleolin OS=Homo sapiens GN=NCL PE=1 SV=3	NCL	P19338	4.7	76.568	710	18.5915	13	13	110000000	14	25.0704	18	18	120000000	20	34	-0.514573
Isoform 2 of Spliceosome RNA helicase DDX39B OS=Homo sapiens GN=DDX39B	DDX39B	Q13838-2	5.88	50.647	443	11.5124	4	1	81000000	7	18.0587	6	6	75000000	10	17	-0.514573
Isoform 4 of Alpha-actinin-1 OS=Homo sapiens GN=ACTN1	ACTN1	P12814-4	5.58	107.074	930	7.41935	5	1	33000000	7	8.70968	7	2	27000000	10	17	-0.514573
Desmocollin-1 OS=Homo sapiens GN=DSC1 PE=1 SV=2	DSC1	Q08554	5.43	99.924	894	10.8501	7	7	71000000	9	12.6398	9	9	120000000	13	22	-0.530515
Complement C3 OS=Homo sapiens GN=C3 PE=1 SV=2	C3	P01024	6.4	187.03	1663	4.99098	7	7	310000000	11	7.75707	12	12	410000000	16	27	-0.540568
Keratin, type II cytoskeletal 1 OS=Homo sapiens GN=KRT1 PE=1 SV=6	KRT1	P04264	8.12	65.999	644	73.2919	56	48	18000000000	482	76.087	64	56	28000000000	706	1188	-0.550635
Keratin, type II cytoskeletal 78 OS=Homo sapiens GN=KRT78 PE=2 SV=2	KRT78	Q8N1N4	6.02	56.83	520	21.9231	9	8	310000000	10	25.1923	11	8	850000000	15	25	-0.584963
Chromobox protein homolog 1 OS=Homo sapiens GN=CBX1 PE=1 SV=1	CBX1	P83916	4.93	21.405	185	25.9459	4	3	29000000	4	32.4324	5	4	19000000	6	10	-0.584963
Tyrosine-protein kinase BAZ1B OS=Homo sapiens GN=BAZ1B PE=1 SV=2	BAZ1B	Q9UIG0	8.48	170.796	1483	1.34862	2	2	9100000	2	2.02293	3	3	5600000	3	5	-0.584963
ATP-dependent RNA helicase DDX42 OS=Homo sapiens GN=DDX42 PE=1 SV=1	DDX42	A0A0A0MSJ0	7.01	77.766	708	4.51977	2	2	10000000	2	4.51977	2	2	12000000	3	5	-0.584963
Isoform 2 of Threonine--tRNA ligase, cytoplasmic OS=Homo sapiens GN=TARS	TARS	P26639-2	6.77	86.806	756	7.93651	4	4	13000000	4	8.20106	5	5	23000000	6	10	-0.584963
ATP-dependent RNA helicase DHX8 OS=Homo sapiens GN=DHX8 PE=1 SV=1	DHX8	Q14562	8.32	139.227	1220	1.55738	2	1	15000000	2	1.55738	2	1	21000000	3	5	-0.584963
Keratin-associated protein 2-2 OS=Homo sapiens GN=KRTAP2-2 PE=4 SV=1	KRTAP2-2	F5H6S0	7.8	13.516	129	7.75194	1	1	38000000	2	7.75194	1	1	120000000	3	5	-0.584963
Tropomyosin alpha-1 chain OS=Homo sapiens GN=TPM1 PE=1 SV=1	TPM1	B7Z596	4.89	31.733	275	12.7273	4	0	41000000	6	20.3636	6	1	45000000	9	15	-0.584963
40S ribosomal protein S14 OS=Homo sapiens GN=RPS14 PE=1 SV=3	RPS14	P62263	10.05	16.263	151	61.5894	7	7	200000000	14	63.5762	10	10	170000000	21	35	-0.584963
U4/U6.U5 tri-snRNP-associated protein 2 OS=Homo sapiens GN=USP39 PE=1 SV=2	USP39	Q53GS9	8.91	65.34	565	4.42478	2	2	11000000	2	2.65487	1	1	7700000	3	5	-0.584963
ATP-dependent RNA helicase DDX50 OS=Homo sapiens GN=DDX50 PE=1 SV=1	DDX50	A0A087WVB0	9.63	82.662	736	4.61957	2	1	56000000	2	6.65761	3	1	60000000	3	5	-0.584963
Complement component C8 beta chain OS=Homo sapiens GN=C8B PE=1 SV=3	C8B	P07358	8.13	67.003	591	3.7225	2	2	24000000	2	3.7225	2	2	33000000	3	5	-0.584963
Ribosome biogenesis regulatory protein homolog OS=Homo sapiens GN=RRS1 PE=1 SV=2	RRS1	Q15050	10.7	41.168	365	4.10959	1	1	13000000	2	6.30137	1	1	10000000	3	5	-0.584963
Eukaryotic translation initiation factor 4H OS=Homo sapiens GN=EIF4H PE=1 SV=5	EIF4H	Q15056	7.23	27.368	248	9.27419	1	1	18000000	2	9.27419	1	1		3	5	-0.584963
Isoform 15 of Fibronectin OS=Homo sapiens GN=FN1	FN1	P02751-15	5.5	272.15	2477	1.09003	2	2	29000000	2	1.49374	3	3	25000000	3	5	-0.584963
Paired mesoderm homeobox protein 2B OS=Homo sapiens GN=PHOX2B PE=1 SV=2	PHOX2B	Q99453	8.84	31.601	314	7.00637	2	2	32000000	2	8.9172	3	3	19000000	3	5	-0.584963
Keratin, type I cytoskeletal 9 OS=Homo sapiens GN=KRT9 PE=1 SV=3	KRT9	P35527	5.24	62.027	623	84.1091	50	49	6900000000	350	84.1091	51	50	11000000000	528	878	-0.593183
Desmoglein-1 OS=Homo sapiens GN=DSG1 PE=1 SV=2	DSG1	Q02413	5.03	113.676	1049	22.7836	15	15	110000000	28	27.3594	19	19	150000000	43	71	-0.61891
Transducin beta-like protein 3 OS=Homo sapiens GN=TBL3 PE=1 SV=2	TBL3	Q12788	6.9	88.978	808	11.1386	4	4	10000000	5	11.2624	5	5	7300000	8	13	-0.678072
Isoform 3 of Scaffold attachment factor B1 OS=Homo sapiens GN=SAFB	SAFB	Q15424-3	5.49	102.793	917	5.56161	4	4	5500000	5	8.39695	5	5	8500000	8	13	-0.678072
Lamin-B1 OS=Homo sapiens GN=LMNB1 PE=1 SV=2	LMNB1	P20700	5.16	66.368	586	35.3242	20	18	160000000	23	37.0307	24	21	190000000	37	60	-0.685891
pre-rRNA processing protein FTSJ3 OS=Homo sapiens GN=FTSJ3 PE=1 SV=2	FTSJ3	Q8IY81	8.4	96.499	847	10.0354	6	6	10000000	8	18.1818	10	10	23000000	13	21	-0.70044
Junction plakoglobin OS=Homo sapiens GN=JUP PE=1 SV=3	JUP	P14923	6.14	81.693	745	48.7248	25	24	180000000	47	59.3289	31	28	400000000	77	124	-0.712198
Phosphoglycerate kinase 1 OS=Homo sapiens GN=PGK1 PE=1 SV=3	PGK1	P00558	8.1	44.586	417	16.0671	5	5	15000000	6	22.3022	6	6	28000000	10	16	-0.736966
Immunoglobulin J chain OS=Homo sapiens GN=IGJ PE=1 SV=4	IGJ	P01591	5.24	18.087	159	10.6918	2	2	200000000	3	10.6918	2	2	240000000	5	8	-0.736966
Protein disulfide-isomerase A3 (Fragment) OS=Homo sapiens GN=PDIA3 PE=1 SV=1	PDIA3	H7BZJ3	7.3	13.511	123	32.5203	3	1	28000000	3	40.6504	4	1	36000000	5	8	-0.736966
E3 SUMO-protein ligase RanBP2 OS=Homo sapiens GN=RANBP2 PE=1 SV=2	RANBP2	P49792	6.2	357.974	3224	1.64392	2	2	8500000	3	3.31886	5	5	6500000	5	8	-0.736966
Keratin, type II cytoskeletal 2 epidermal OS=Homo sapiens GN=KRT2 PE=1 SV=2	KRT2	P35908	8	65.393	639	84.507	58	44	11000000000	258	86.8545	63	46	17000000000	430	688	-0.736966
Isoform 2 of Fructose-bisphosphate aldolase A OS=Homo sapiens GN=ALDOA	ALDOA	P04075-2	8.25	45.232	418	33.4928	11	11	220000000	27	45.4545	17	17	270000000	46	73	-0.768674
Splicing factor U2AF 35 kDa subunit OS=Homo sapiens GN=U2AF1 PE=1 SV=3	U2AF1	Q01081	8.81	27.854	240	25.4167	5	5	110000000	7	22.0833	4	4	140000000	12	19	-0.777608
Splicing factor U2AF 65 kDa subunit OS=Homo sapiens GN=U2AF2 PE=1 SV=4	U2AF2	P26368	9.09	53.467	475	9.05263	4	4	37000000	4	11.1579	4	4	67000000	7	11	-0.807355
Actin-related protein 2/3 complex subunit 2 OS=Homo sapiens GN=ARPC2 PE=1 SV=1	ARPC2	O15144	7.36	34.311	300	23.3333	4	4	28000000	4	26.3333	5	5	28000000	7	11	-0.807355
Keratin, type II cytoskeletal 4 OS=Homo sapiens GN=KRT4 PE=1 SV=4	KRT4	P19013	6.61	57.25	534	7.30337	4	1	1900000000	54	10.8614	6	1	3900000000	96	150	-0.830075
Aspartate aminotransferase, cytoplasmic OS=Homo sapiens GN=GOT1 PE=1 SV=3	GOT1	P17174	7.01	46.219	413	10.8959	3	3	35000000	6	18.4019	6	6	58000000	11	17	-0.874469
Keratin, type I cytoskeletal 10 OS=Homo sapiens GN=KRT10 PE=1 SV=6	KRT10	P13645	5.21	58.792	584	67.8082	47	40	7100000000	348	69.1781	55	49	12000000000	642	990	-0.883486
Keratin, type II cytoskeletal 6B OS=Homo sapiens GN=KRT6B PE=1 SV=5	KRT6B	P04259	8	60.03	564	50.5319	35	2	4600000000	83	66.1348	48	2	7800000000	158	241	-0.928741
Keratin, type II cytoskeletal 5 OS=Homo sapiens GN=KRT5 PE=1 SV=3	KRT5	P13647	7.74	62.34	590	51.1864	37	24	3500000000	76	60.678	49	32	7100000000	145	221	-0.931982
Keratin, type II cytoskeletal 80 OS=Homo sapiens GN=KRT80 PE=1 SV=2	KRT80	Q6KB66	5.67	50.494	452	9.95575	4	3	52000000	52	21.9027	8	7	200000000	100	152	-0.943416
Serrate RNA effector molecule homolog OS=Homo sapiens GN=SRRT PE=1 SV=1	SRRT	Q9BXP5	5.96	100.604	876	1.25571	1	1		1	2.73973	2	2	18000000	2	3	-1
Serine/arginine-rich splicing factor 4 OS=Homo sapiens GN=SRSF4 PE=1 SV=2	SRSF4	Q08170	11.52	56.645	494	3.84615	2	2	20000000	2	5.66802	3	3	23000000	4	6	-1
Structural maintenance of chromosomes flexible hinge domain-containing protein 1 OS=Homo sapiens GN=SMCHD1 PE=1 SV=2	SMCHD1	A6NHR9	7.3	226.231	2005	0.548628	1	1	6800000	1	1.19701	2	2	6700000	2	3	-1
Nuclear pore complex protein Nup98-Nup96 OS=Homo sapiens GN=NUP98 PE=1 SV=4	NUP98	P52948	6.4	197.457	1817	0.825537	1	1	11000000	1	1.65107	2	2	7300000	2	3	-1
Centromere protein V OS=Homo sapiens GN=CENPV PE=1 SV=1	CENPV	Q7Z7K6	9.73	29.927	275	11.6364	2	2	55000000	3	27.6364	5	5	39000000	6	9	-1
Sarcoplasmic/endoplasmic reticulum calcium ATPase 2 OS=Homo sapiens GN=ATP2A2 PE=1 SV=1	ATP2A2	P16615	5.34	114.683	1042	1.43954	1	1	8800000	1	2.11132	2	2		2	3	-1
Pantetheinase OS=Homo sapiens GN=VNN1 PE=1 SV=2	VNN1	O95497	5.55	56.975	513	3.7037	1	1	36000000	1	3.7037	1	1	73000000	2	3	-1
Serine/threonine-protein phosphatase 2A catalytic subunit beta isoform OS=Homo sapiens GN=PPP2CB PE=1 SV=1	PPP2CB	P62714	5.43	35.552	309	17.0213	1	1	7700000	1	8.09061	2	2	17000000	2	3	-1
Peroxiredoxin-4 OS=Homo sapiens GN=PRDX4 PE=1 SV=1	PRDX4	Q13162	6.29	30.521	271	2.95203	1	1	160000000	2	8.48708	3	1	43000000	4	6	-1
Probable ATP-dependent RNA helicase DDX56 OS=Homo sapiens GN=DDX56 PE=1 SV=1	DDX56	F8WDT8	5.41	20.33	185	7.56757	1	1	18000000	1	7.56757	1	1	9300000	2	3	-1
N-acetyltransferase 10 OS=Homo sapiens GN=NAT10 PE=1 SV=2	NAT10	Q9H0A0	8.27	115.657	1025	1.56098	1	1	5500000	1	2.53659	1	1	19000000	2	3	-1
ATP synthase subunit alpha, mitochondrial OS=Homo sapiens GN=ATP5A1 PE=1 SV=1	ATP5A1	P25705	9.13	59.714	553	8.13743	3	3	25000000	4	12.8391	5	5	46000000	8	12	-1
Zinc finger protein 512 OS=Homo sapiens GN=ZNF512 PE=1 SV=2	ZNF512	Q96ME7	9.76	64.641	567	3.35097	1	1		1	5.64374	2	2	6900000	2	3	-1
Isoform 2 of 40S ribosomal protein S29 OS=Homo sapiens GN=RPS29	RPS29	P62273-2	10.02	8.082	67	11.9403	1	1	25000000	1	11.9403	2	2	140000000	2	3	-1
Isoform 2 of Neutral alpha-glucosidase AB OS=Homo sapiens GN=GANAB	GANAB	Q14697-2	6.24	109.369	966	4.34783	2	2	15000000	2	6.72878	3	3	32000000	4	6	-1
Loricrin OS=Homo sapiens GN=LOR PE=1 SV=2	LOR	P23490	8.09	25.744	312	4.16667	2	2	22000000	2	6.73077	3	3	42000000	4	6	-1
Acylglycerol kinase, mitochondrial OS=Homo sapiens GN=AGK PE=1 SV=2	AGK	Q53H12	8.09	47.107	422	14.6919	3	3	48000000	3	18.9573	5	5	59000000	6	9	-1
Acidic leucine-rich nuclear phosphoprotein 32 family member B OS=Homo sapiens GN=ANP32B PE=1 SV=1	ANP32B	Q92688	4.06	28.77	251	8.36653	1	1		1	8.36653	1	1		2	3	-1
Proline-, glutamic acid- and leucine-rich protein 1 OS=Homo sapiens GN=PELP1 PE=1 SV=2	PELP1	C9JFV4	4.41	124.865	1180	1.35593	1	1	2400000	1	2.28814	2	2	4900000	2	3	-1
Coiled-coil domain-containing protein 124 OS=Homo sapiens GN=CCDC124 PE=1 SV=1	CCDC124	Q96CT7	9.54	25.82	223	5.8296	1	1	11000000	1	9.41704	2	2	11000000	2	3	-1
Adenylyl cyclase-associated protein 1 OS=Homo sapiens GN=CAP1 PE=1 SV=5	CAP1	Q01518	8.06	51.869	475	1.68421	1	1	15000000	1	4.21053	2	2	9600000	2	3	-1
Isoform 3 of Transcription factor 12 OS=Homo sapiens GN=TCF12	TCF12	Q99081-3	6.9	75.799	706	2.69122	1	1	19000000	1	5.38244	2	2	24000000	2	3	-1
Pescadillo homolog OS=Homo sapiens GN=PES1 PE=1 SV=1	PES1	O00541	7.33	67.96	588	1.36054	1	1	4300000	1	4.42177	2	2	4400000	2	3	-1
Coiled-coil-helix-coiled-coil-helix domain-containing protein 1 OS=Homo sapiens GN=CHCHD1 PE=1 SV=1	CHCHD1	Q96BP2	10.21	13.466	118	12.7119	1	1	12000000	1	26.2712	2	2	25000000	2	3	-1
RRP12-like protein OS=Homo sapiens GN=RRP12 PE=1 SV=2	RRP12	Q5JTH9	8.75	143.611	1297	1.61912	2	2	13000000	2	3.46955	4	4	11000000	4	6	-1
Transcriptional repressor p66-beta OS=Homo sapiens GN=GATAD2B PE=1 SV=1	GATAD2B	Q8WXI9	9.7	65.22	593	1.85497	1	1	9400000	1	3.54132	2	2	7900000	2	3	-1
Protein disulfide-isomerase A3 OS=Homo sapiens GN=PDIA3 PE=1 SV=4	PDIA3	P30101	6.35	56.747	505	19.604	7	5	45000000	7	23.5644	9	6	46000000	14	21	-1
Exosome component 10 OS=Homo sapiens GN=EXOSC10 PE=1 SV=2	EXOSC10	Q01780	8.46	100.768	885	1.12994	1	1	2700000	1	2.0339	2	2	1600000	2	3	-1
Isoform 3 of Bcl-2-like protein 2 OS=Homo sapiens GN=BCL2L2	BCL2L2	Q92843-2	8.13	37.147	333	3.3033	1	1		1	5.70571	2	2	26000000	2	3	-1
tRNA (cytosine(34)-C(5))-methyltransferase OS=Homo sapiens GN=NSUN2 PE=1 SV=2	NSUN2	Q08J23	6.77	86.416	767	1.30378	1	1	7000000	1	3.78096	2	2	4100000	2	3	-1
Catenin beta-1 OS=Homo sapiens GN=CTNNB1 PE=1 SV=1	CTNNB1	B4DGU4	5.92	84.712	774	7.75194	3	2	41000000	3	6.07235	4	1	100000000	6	9	-1
Isoform 5 of Splicing factor 1 OS=Homo sapiens GN=SF1	SF1	Q15637-5	9.58	71.706	673	5.49777	2	2	4600000	2	6.98366	3	3	3600000	4	6	-1
Polyadenylate-binding protein 1 (Fragment) OS=Homo sapiens GN=PABPC1 PE=1 SV=1	PABPC1	E5RH24	8.68	13.294	118	25.5814	1	1	330000000	1	15.2542	2	2		2	3	-1
Desmocollin-3 OS=Homo sapiens GN=DSC3 PE=1 SV=3	DSC3	Q14574	6.1	99.906	896	1.00446	1	1		1	2.12054	2	2	8300000	2	3	-1
Guanine nucleotide-binding protein G(I)/G(S)/G(T) subunit beta-1 OS=Homo sapiens GN=GNB1 PE=1 SV=3	GNB1	P62873	6	37.353	340	2.94118	1	1	17000000	1	6.47059	2	2	7100000	2	3	-1
Splicing factor 3B subunit 6 OS=Homo sapiens GN=SF3B6 PE=1 SV=1	SF3B6	Q9Y3B4	9.38	14.576	125	6.4	1	1	23000000	1	17.6	2	2	11000000	2	3	-1
Serine/arginine-rich splicing factor 11 OS=Homo sapiens GN=SRSF11 PE=1 SV=1	SRSF11	Q05519	10.52	53.51	484	7.85124	2	2	34000000	3	10.7438	3	3	29000000	6	9	-1
Keratin, type II cytoskeletal 6C OS=Homo sapiens GN=KRT6C PE=1 SV=3	KRT6C	P48668	8	59.988	564	48.4043	35	3	3800000000	64	65.9574	48	1	7200000000	137	201	-1.09803
Keratin, type I cytoskeletal 15 OS=Homo sapiens GN=KRT15 PE=1 SV=3	KRT15	P19012	4.77	49.181	456	12.2807	9	0	2700000000	13	20.3947	12	3	5000000000	28	41	-1.10692
Keratinocyte proline-rich protein OS=Homo sapiens GN=KPRP PE=1 SV=1	KPRP	Q5T749	8.27	64.093	579	29.361	12	12	300000000	20	44.5596	17	17	420000000	44	64	-1.1375
Isoform 4 of Treacle protein OS=Homo sapiens GN=TCOF1	TCOF1	Q13428-4	8.95	155.836	1524	4.06824	5	5	13000000	5	8.13648	10	10	18000000	11	16	-1.1375
X-ray repair cross-complementing protein 6 OS=Homo sapiens GN=XRCC6 PE=1 SV=2	XRCC6	P12956	6.64	69.799	609	9.35961	5	5	27000000	5	18.3908	10	10	27000000	11	16	-1.1375
Keratin, type II cytoskeletal 6A OS=Homo sapiens GN=KRT6A PE=1 SV=3	KRT6A	P02538	8	60.008	564	50.3546	35	2	3800000000	66	67.0213	51	2	7200000000	148	214	-1.16506
Keratin, type I cytoskeletal 16 OS=Homo sapiens GN=KRT16 PE=1 SV=4	KRT16	P08779	5.05	51.236	473	67.2304	30	15	5000000000	55	69.3446	38	22	8900000000	124	179	-1.17284
Isoform 2 of Arginase-1 OS=Homo sapiens GN=ARG1	ARG1	P05089-2	7.21	35.642	330	11.8182	3	3	9500000	3	26.9697	7	7	31000000	7	10	-1.22239
Serotransferrin OS=Homo sapiens GN=TF PE=1 SV=3	TF	P02787	7.12	77.014	698	3.29513	2	2	69000000	3	4.72779	4	4	51000000	7	10	-1.22239
DNA-(apurinic or apyrimidinic site) lyase OS=Homo sapiens GN=APEX1 PE=1 SV=2	APEX1	P27695	8.12	35.532	318	11.0063	2	2	6500000	2	19.8113	4	4	9500000	5	7	-1.32193
F-box only protein 50 OS=Homo sapiens GN=NCCRP1 PE=1 SV=1	NCCRP1	Q6ZVX7	6.62	30.828	275	14.5455	2	2	8800000	2	14.9091	2	2	53000000	5	7	-1.32193
Endoplasmin OS=Homo sapiens GN=HSP90B1 PE=1 SV=1	HSP90B1	Q96GW1	4.7	35.428	315	11.4286	2	1	320000000	2	18.4127	4	3	56000000	5	7	-1.32193
Signal recognition particle 14 kDa protein OS=Homo sapiens GN=SRP14 PE=1 SV=2	SRP14	P37108	10.04	14.561	136	16.9118	2	2	20000000	2	30.8824	5	5	21000000	5	7	-1.32193
Protein S100-A11 OS=Homo sapiens GN=S100A11 PE=1 SV=2	S100A11	P31949	7.12	11.733	105	19.0476	2	2	47000000	2	64.7619	4	4	20000000	5	7	-1.32193
Keratin, type II cytoskeletal 72 OS=Homo sapiens GN=KRT72 PE=1 SV=2	KRT72	Q14CN4	6.89	55.842	511	5.67515	4	1	860000000	5	9.98043	6	2	2200000000	13	18	-1.37851
Keratin, type I cytoskeletal 14 OS=Homo sapiens GN=KRT14 PE=1 SV=4	KRT14	P02533	5.16	51.529	472	55.0847	27	7	5000000000	61	68.4322	38	14	8900000000	162	223	-1.40911
DNA topoisomerase 2-beta OS=Homo sapiens GN=TOP2B PE=1 SV=3	TOP2B	Q02880	8	183.152	1626	2.89053	4	4	21000000	4	7.38007	11	11	23000000	11	15	-1.45943
Desmoplakin OS=Homo sapiens GN=DSP PE=1 SV=3	DSP	P15924	6.81	331.569	2871	20.411	49	49	100000000	66	42.2153	110	110	270000000	182	248	-1.4634
Keratin, type II cytoskeletal 3 OS=Homo sapiens GN=KRT3 PE=1 SV=3	KRT3	P12035	6.48	64.378	628	11.7834	11	4	1100000000	21	17.0382	15	1	2700000000	59	80	-1.49033
Keratin, type II cytoskeletal 79 OS=Homo sapiens GN=KRT79 PE=1 SV=2	KRT79	Q5XKE5	7.2	57.8	535	10.0935	7	1	2500000000	19	17.3832	12	2	5500000000	54	73	-1.50696
Non-histone chromosomal protein HMG-14 OS=Homo sapiens GN=HMGN1 PE=1 SV=3	HMGN1	P05114	9.6	10.653	100	47	2	2	24000000	3	55	3	3	42000000	9	12	-1.58496
Cornifin-B OS=Homo sapiens GN=SPRR1B PE=1 SV=2	SPRR1B	P22528	8.48	9.881	89	17.9775	2	2	65000000	2	70.7865	5	1	360000000	6	8	-1.58496
Isoform 2 of Calnexin OS=Homo sapiens GN=CANX	CANX	P27824-2	4.7	71.458	627	2.55183	1	1	9500000	1	5.58214	3	3	10000000	3	4	-1.58496
Ig kappa chain V-III region NG9 (Fragment) OS=Homo sapiens PE=1 SV=1	NOGENE	P01621	6.52	10.722	100	9	1	0	2600000000	1	9	1	1	2800000000	3	4	-1.58496
Protein RRP5 homolog OS=Homo sapiens GN=PDCD11 PE=1 SV=3	PDCD11	Q14690	8.87	208.57	1871	0.534474	1	1	7900000	1	1.60342	3	3	10000000	3	4	-1.58496
Small ubiquitin-related modifier 1 OS=Homo sapiens GN=SUMO1 PE=1 SV=1	SUMO1	B8ZZN6	6.2	16.634	146	4.79452	1	1	34000000	1	17.1233	3	3	21000000	3	4	-1.58496
Cornifin-A OS=Homo sapiens GN=SPRR1A PE=1 SV=2	SPRR1A	P35321	8.48	9.871	89	26.9663	2	2	65000000	2	70.7865	5	1	340000000	6	8	-1.58496
Small proline-rich protein 2G OS=Homo sapiens GN=SPRR2G PE=2 SV=1	SPRR2G	Q9BYE4	7.96	8.152	73	30.137	2	2	57000000	4	79.4521	4	2	300000000	12	16	-1.58496
60S ribosomal protein L22-like 1 (Fragment) OS=Homo sapiens GN=RPL22L1 PE=1 SV=1	RPL22L1	H0Y8C2	9.25	16.89	142	16.9014	1	1	130000000	1	33.8028	3	3	81000000	3	4	-1.58496
60S ribosomal protein L22 OS=Homo sapiens GN=RPL22 PE=1 SV=2	RPL22	P35268	9.19	14.778	128	30.4688	2	2	160000000	3	39.0625	3	3	150000000	9	12	-1.58496
Malate dehydrogenase, mitochondrial OS=Homo sapiens GN=MDH2 PE=1 SV=3	MDH2	P40926	8.68	35.481	338	5.6213	1	1		1	14.497	3	3	10000000	3	4	-1.58496
Keratin, type I cytoskeletal 17 OS=Homo sapiens GN=KRT17 PE=1 SV=2	KRT17	Q04695	5.02	48.076	432	42.3611	20	7	2800000000	32	69.213	37	19	5100000000	96	128	-1.58496
Flap endonuclease 1 OS=Homo sapiens GN=FEN1 PE=1 SV=1	FEN1	P39748	8.62	42.566	380	4.21053	1	1		1	6.31579	3	3	4800000	3	4	-1.58496
Apolipoprotein D (Fragment) OS=Homo sapiens GN=APOD PE=1 SV=1	APOD	C9JX71	4.88	16.873	149	9.39597	1	1	36000000	1	9.39597	1	1	17000000	3	4	-1.58496
Isoform HMG-Y of High mobility group protein HMG-I/HMG-Y OS=Homo sapiens GN=HMGA1	HMGA1	P17096-2	10.32	10.673	96	8.33333	1	1	68000000	1	26.0417	3	1	5200000	3	4	-1.58496
Actin-related protein 2/3 complex subunit 3 OS=Homo sapiens GN=ARPC3 PE=1 SV=3	ARPC3	O15145	8.59	20.533	178	6.17978	1	1	10000000	1	16.2921	3	3	23000000	3	4	-1.58496
14-3-3 protein sigma OS=Homo sapiens GN=SFN PE=1 SV=1	SFN	P31947	4.74	27.757	248	16.129	5	0	340000000	8	58.0645	14	11	370000000	24	32	-1.58496
Protein S100-A8 OS=Homo sapiens GN=S100A8 PE=1 SV=1	S100A8	P05109	7.03	10.828	93	46.2366	6	6	38000000	7	70.9677	12	12	440000000	22	29	-1.65208
Clathrin heavy chain 1 OS=Homo sapiens GN=CLTC PE=1 SV=1	CLTC	A0A087WVQ6	5.69	191.936	1679	70.1031	4	4	35000000	12	18.2847	22	22	100000000	38	50	-1.66297
Small proline-rich protein 2E OS=Homo sapiens GN=SPRR2E PE=2 SV=2	SPRR2E	P22531	8.31	7.85	72	61.1111	3	3	39000000	5	79.1667	5	1	320000000	17	22	-1.76553
Small proline-rich protein 2D OS=Homo sapiens GN=SPRR2D PE=2 SV=2	SPRR2D	P22532	8.37	7.9	72	30.5556	2	2	57000000	4	79.1667	5	2	320000000	14	18	-1.80735
Suprabasin OS=Homo sapiens GN=SBSN PE=1 SV=2	SBSN	Q6UWP8	7.01	60.505	590	18.3051	3	3	7900000	4	27.7966	7	7	23000000	15	19	-1.90689
Probable 28S rRNA (cytosine(4447)-C(5))-methyltransferase OS=Homo sapiens GN=NOP2 PE=1 SV=1	NOP2	A0A087WV73	9.11	94.038	855	4.21053	2	2	7500000	2	10.7602	8	8	10000000	8	10	-2
Phosphate carrier protein, mitochondrial OS=Homo sapiens GN=SLC25A3 PE=1 SV=2	SLC25A3	Q00325	9.38	40.069	362	3.31492	1	1	130000000	1	10.4972	3	3	74000000	4	5	-2
Activated RNA polymerase II transcriptional coactivator p15 OS=Homo sapiens GN=SUB1 PE=1 SV=3	SUB1	P53999	9.6	14.386	127	10.2362	1	1	24000000	1	17.3228	4	4	27000000	4	5	-2
Bleomycin hydrolase OS=Homo sapiens GN=BLMH PE=1 SV=1	BLMH	Q13867	6.27	52.528	455	1.97802	1	1	6800000	1	7.03297	2	2	11000000	4	5	-2
Small proline-rich protein 2A OS=Homo sapiens GN=SPRR2A PE=1 SV=1	SPRR2A	P35326	8.43	7.96	72	43.0556	2	2	57000000	4	79.1667	5	1	320000000	16	20	-2
Transformer-2 protein homolog alpha OS=Homo sapiens GN=TRA2A PE=1 SV=1	TRA2A	Q13595	11.27	32.669	282	3.19149	1	1		1	8.51064	2	1	20000000	4	5	-2
Isoform 2 of Copper-transporting ATPase 1 OS=Homo sapiens GN=ATP7A	ATP7A	Q04656-3	6.38	171.968	1581	6.00886	7	7	25000000	7	1.26502	4	4	9500000000	31	38	-2.14684
Calreticulin OS=Homo sapiens GN=CALR PE=1 SV=1	CALR	P27797	4.44	48.112	417	3.11751	1	1		1	11.9904	4	4	18000000	5	6	-2.32193
Isoform 1 of Plakophilin-1 OS=Homo sapiens GN=PKP1	PKP1	Q13835-2	8.97	80.445	726	5.64738	3	3	13000000	3	26.584	15	15	68000000	16	19	-2.41504
Ribosomal RNA processing protein 1 homolog A OS=Homo sapiens GN=RRP1 PE=1 SV=1	RRP1	P56182	9.33	52.807	461	2.81996	1	1	6400000	1	9.32755	4	4	9200000	6	7	-2.58496
Serine/arginine-rich splicing factor 9 OS=Homo sapiens GN=SRSF9 PE=1 SV=1	SRSF9	Q13242	8.65	25.526	221	4.52489	1	1	62000000	1	24.4344	5	5	64000000	6	7	-2.58496
14-3-3 protein epsilon OS=Homo sapiens GN=YWHAE PE=1 SV=1	YWHAE	P62258	4.74	29.155	255	18.4211	1	0	83000000	1	27.451	6	4	140000000	7	8	-2.80735
Glutathione S-transferase P OS=Homo sapiens GN=GSTP1 PE=1 SV=2	GSTP1	P09211	5.64	23.341	210	7.61905	1	1		1	25.7143	3	3	23000000	8	9	-3
Protein S100-A9 OS=Homo sapiens GN=S100A9 PE=1 SV=1	S100A9	P06702	6.13	13.234	114	26.3158	2	2	96000000	2	63.1579	7	7	820000000	24	26	-3.58496
Protein S100-A7 OS=Homo sapiens GN=S100A7 PE=1 SV=4	S100A7	P31151	6.77	11.464	101	19.802	1	1	9200000	1	71.2871	10	10	200000000	20	21	-4.32193
Galectin-7 OS=Homo sapiens GN=LGALS7 PE=1 SV=2	LGALS7	P47929	7.62	15.066	136	8.82353	1	1	7800000	1	51.4706	5	5	360000000	22	23	-4.45943
60S ribosomal protein L7-like 1 OS=Homo sapiens GN=RPL7L1 PE=1 SV=1	RPL7L1	Q6DKI1	10.51	28.643	246	0	0	0	0	0	6.50407	1	1	8200000	1	1	-6.64386
Creatine kinase B-type OS=Homo sapiens GN=CKB PE=1 SV=1	CKB	P12277	5.59	42.617	381	0	0	0	0	0	2.88714	1	1		1	1	-6.64386
Protein DEK OS=Homo sapiens GN=DEK PE=1 SV=1	DEK	P35659	8.56	42.648	375	0	0	0	0	0	5.86667	2	2	6300000	2	2	-6.64386
Insulin-like growth factor I OS=Homo sapiens GN=IGF1 PE=1 SV=1	IGF1	P05019	9.72	21.827	195	0	0	0	0	0	6.66667	1	1	6100000	1	1	-6.64386
Nucleolar protein 9 OS=Homo sapiens GN=NOP9 PE=1 SV=1	NOP9	Q86U38	7.28	69.394	636	0	0	0	0	0	2.04403	1	1	37000000	1	1	-6.64386
Ras-related protein Rab-7a OS=Homo sapiens GN=RAB7A PE=1 SV=1	RAB7A	C9J8S3	8.29	18.015	160	0	0	0	0	0	6.25	1	1	4800000	1	1	-6.64386
Cystatin-B OS=Homo sapiens GN=CSTB PE=1 SV=2	CSTB	P04080	7.56	11.133	98	0	0	0	0	0	12.2449	1	1	4900000	1	1	-6.64386
Late cornified envelope protein 1C OS=Homo sapiens GN=LCE1C PE=2 SV=1	LCE1C	Q5T751	8.37	11.535	118	0	0	0	0	0	28.8136	1	1	5800000	4	4	-6.64386
Glyceraldehyde-3-phosphate dehydrogenase, testis-specific OS=Homo sapiens GN=GAPDHS PE=1 SV=2	GAPDHS	O14556	8.19	44.473	408	0	0	0	0	0	2.69608	1	1	110000000	1	1	-6.64386
Annexin A1 OS=Homo sapiens GN=ANXA1 PE=1 SV=2	ANXA1	P04083	7.02	38.69	346	0	0	0	0	0	46.5318	13	13	100000000	19	19	-6.64386
Envoplakin OS=Homo sapiens GN=EVPL PE=1 SV=1	EVPL	K7EKI0	7.25	233.688	2055	0	0	0	0	0	0.583942	1	1	8300000	1	1	-6.64386
Isoform 2 of Leucine-rich repeat-containing protein 15 OS=Homo sapiens GN=LRRC15	LRRC15	Q8TF66-2	6.71	64.981	587	0	0	0	0	0	1.70358	1	1	83000000	1	1	-6.64386
Cell division control protein 42 homolog OS=Homo sapiens GN=CDC42 PE=1 SV=2	CDC42	P60953	6.55	21.245	191	0	0	0	0	0	5.2356	1	1		1	1	-6.64386
Isoform 3 of Calumenin OS=Homo sapiens GN=CALU	CALU	O43852-3	4.63	38.027	323	0	0	0	0	0	2.16718	1	1	13000000	1	1	-6.64386
Protein furry homolog OS=Homo sapiens GN=FRY PE=1 SV=1	FRY	Q5TBA9	5.99	338.659	3013	0	0	0	0	0	0.398274	1	1		1	1	-6.64386
Isoform 3 of Malate dehydrogenase, cytoplasmic OS=Homo sapiens GN=MDH1	MDH1	P40925-3	7.71	38.603	352	0	0	0	0	0	3.40909	1	1	10000000	1	1	-6.64386
Arginine and glutamate-rich protein 1 OS=Homo sapiens GN=ARGLU1 PE=1 SV=1	ARGLU1	Q9NWB6	10.35	33.197	273	0	0	0	0	0	11.7216	4	4	37000000	4	4	-6.64386
Uncharacterized protein (Fragment) OS=Homo sapiens PE=3 SV=2	NOGENE	H7C0C1	9.45	26.782	242	0	0	0	0	0	13.6364	2	2	4700000	2	2	-6.64386
Calmodulin-like protein 5 OS=Homo sapiens GN=CALML5 PE=1 SV=2	CALML5	Q9NZT1	4.44	15.883	146	0	0	0	0	0	21.2329	2	2	61000000	4	4	-6.64386
Arginine/serine-rich coiled-coil protein 2 OS=Homo sapiens GN=RSRC2 PE=1 SV=1	RSRC2	Q7L4I2	11.33	50.529	434	0	0	0	0	0	1.6129	1	1	2900000	1	1	-6.64386
Isoform 2 of NADH dehydrogenase [ubiquinone] 1 alpha subcomplex subunit 10, mitochondrial OS=Homo sapiens GN=NDUFA10	NDUFA10	O95299-2	7.21	48.532	429	0	0	0	0	0	5.12821	1	1		1	1	-6.64386
Cellular retinoic acid-binding protein 2 OS=Homo sapiens GN=CRABP2 PE=1 SV=2	CRABP2	P29373	5.4	15.683	138	0	0	0	0	0	16.6667	2	2	15000000	2	2	-6.64386
Caspase-14 OS=Homo sapiens GN=CASP14 PE=1 SV=2	CASP14	P31944	5.58	27.662	242	0	0	0	0	0	15.2893	3	3	4700000	3	3	-6.64386
Isoform 3 of Replication protein A 32 kDa subunit OS=Homo sapiens GN=RPA2	RPA2	P15927-3	8.94	38.786	358	0	0	0	0	0	6.42458	1	1		2	2	-6.64386
Ig heavy chain V-III region HIL OS=Homo sapiens PE=1 SV=1	NOGENE	P01771	9.36	13.557	121	0	0	0	0	0	9.09091	1	1	1900000	1	1	-6.64386
Microfibrillar-associated protein 1 OS=Homo sapiens GN=MFAP1 PE=1 SV=2	MFAP1	P55081	4.98	51.927	439	0	0	0	0	0	2.96128	1	1		1	1	-6.64386
Protein HEXIM1 OS=Homo sapiens GN=HEXIM1 PE=1 SV=1	HEXIM1	O94992	4.89	40.598	359	0	0	0	0	0	2.22841	1	1		1	1	-6.64386
60S ribosome subunit biogenesis protein NIP7 homolog OS=Homo sapiens GN=NIP7 PE=1 SV=1	NIP7	J3QLW7	8.27	12.445	110	0	0	0	0	0	8.18182	1	1	7900000	1	1	-6.64386
Multiple myeloma tumor-associated protein 2 OS=Homo sapiens GN=MMTAG2 PE=1 SV=1	MMTAG2	Q9BU76	10.02	29.394	263	0	0	0	0	0	5.32319	1	1	7800000	1	1	-6.64386
Serine/arginine-rich splicing factor 2 OS=Homo sapiens GN=SRSF2 PE=1 SV=4	SRSF2	Q01130	11.85	25.461	221	0	0	0	0	0	11.3122	2	2	210000000	2	2	-6.64386
Cardiomyopathy-associated protein 5 OS=Homo sapiens GN=CMYA5 PE=1 SV=3	CMYA5	Q8N3K9	4.78	448.935	4069	0	0	0	0	0	0.393217	1	1	15000000	1	1	-6.64386
N-acylneuraminate cytidylyltransferase OS=Homo sapiens GN=CMAS PE=1 SV=2	CMAS	Q8NFW8	7.93	48.349	434	0	0	0	0	0	3.45622	1	1	3700000	1	1	-6.64386
Chloride intracellular channel protein 1 OS=Homo sapiens GN=CLIC1 PE=1 SV=4	CLIC1	O00299	5.17	26.906	241	0	0	0	0	0	12.4481	2	2	12000000	2	2	-6.64386
ITIH4 protein OS=Homo sapiens GN=ITIH4 PE=1 SV=1	ITIH4	B7ZKJ8	6.89	103.816	935	0	0	0	0	0	1.06952	1	1	34000000	1	1	-6.64386
Rho GDP-dissociation inhibitor 1 OS=Homo sapiens GN=ARHGDIA PE=1 SV=1	ARHGDIA	J3QQX2	7.44	25.815	235	0	0	0	0	0	6.38298	1	1	4300000	1	1	-6.64386
Protein-glutamine gamma-glutamyltransferase K OS=Homo sapiens GN=TGM1 PE=1 SV=4	TGM1	P22735	6.04	89.73	817	0	0	0	0	0	1.59119	1	1	4300000	1	1	-6.64386
WD repeat-containing protein 18 OS=Homo sapiens GN=WDR18 PE=1 SV=2	WDR18	Q9BV38	6.7	47.375	432	0	0	0	0	0	2.31481	1	1	15000000	1	1	-6.64386
Isoleucine--tRNA ligase, mitochondrial OS=Homo sapiens GN=IARS2 PE=1 SV=2	IARS2	Q9NSE4	7.2	113.719	1012	0	0	0	0	0	1.18577	1	1		1	1	-6.64386
Triosephosphate isomerase OS=Homo sapiens GN=TPI1 PE=1 SV=3	TPI1	P60174	5.92	30.772	286	0	0	0	0	0	15.035	3	3	9000000	3	3	-6.64386
Involucrin OS=Homo sapiens GN=IVL PE=1 SV=2	IVL	P07476	4.61	68.437	585	0	0	0	0	0	25.1282	11	11	29000000	24	24	-6.64386
Cytochrome b-c1 complex subunit 1, mitochondrial OS=Homo sapiens GN=UQCRC1 PE=1 SV=3	UQCRC1	P31930	6.37	52.612	480	0	0	0	0	0	6.45833	2	2	6900000	2	2	-6.64386
Inter-alpha-trypsin inhibitor heavy chain H1 OS=Homo sapiens GN=ITIH1 PE=1 SV=3	ITIH1	P19827	6.79	101.326	911	0	0	0	0	0	1.31723	1	1	5900000	1	1	-6.64386
Aldehyde dehydrogenase, dimeric NADP-preferring OS=Homo sapiens GN=ALDH3A1 PE=1 SV=3	ALDH3A1	P30838	6.54	50.363	453	0	0	0	0	0	4.19426	1	1		1	1	-6.64386
Protein disulfide-isomerase OS=Homo sapiens GN=P4HB PE=1 SV=3	P4HB	P07237	4.87	57.081	508	0	0	0	0	0	11.0236	5	5	15000000	6	6	-6.64386
Thymocyte nuclear protein 1 OS=Homo sapiens GN=THYN1 PE=1 SV=1	THYN1	Q9P016	9.25	25.681	225	0	0	0	0	0	4.44444	1	1	2500000	1	1	-6.64386
Protein IGLV8-61 (Fragment) OS=Homo sapiens GN=IGLV8-61 PE=1 SV=3	IGLV8-61	A0A075B6I0	4.55	12.806	122	0	0	0	0	0	7.37705	1	1	91000000	1	1	-6.64386
BUB3-interacting and GLEBS motif-containing protein ZNF207 OS=Homo sapiens GN=ZNF207 PE=1 SV=1	ZNF207	J3QRS9	9.01	52.507	493	0	0	0	0	0	1.41988	1	1	6400000	1	1	-6.64386
Translation machinery-associated protein 16 (Fragment) OS=Homo sapiens GN=TMA16 PE=1 SV=1	TMA16	H0Y9X1	9.57	27.664	242	0	0	0	0	0	6.19835	1	1	3200000	1	1	-6.64386
Ribonuclease inhibitor OS=Homo sapiens GN=RNH1 PE=1 SV=2	RNH1	P13489	4.82	49.941	461	0	0	0	0	0	8.02603	2	2	5600000	2	2	-6.64386
RNA-binding protein 4 OS=Homo sapiens GN=RBM4 PE=1 SV=1	RBM4	Q9BWF3	7.08	40.289	364	0	0	0	0	0	10.1648	2	2	11000000	3	3	-6.64386
Transcription factor BTF3 OS=Homo sapiens GN=BTF3 PE=1 SV=1	BTF3	P20290	9.38	22.154	206	0	0	0	0	0	3.8835	1	1		1	1	-6.64386
Protein-glutamine gamma-glutamyltransferase E OS=Homo sapiens GN=TGM3 PE=1 SV=4	TGM3	Q08188	5.86	76.584	693	0	0	0	0	0	9.23521	6	6	23000000	6	6	-6.64386
Signal recognition particle 9 kDa protein OS=Homo sapiens GN=SRP9 PE=1 SV=2	SRP9	P49458	7.97	10.105	86	0	0	0	0	0	26.7442	3	3	12000000	3	3	-6.64386
High mobility group nucleosome-binding domain-containing protein 3 OS=Homo sapiens GN=HMGN3 PE=1 SV=1	HMGN3	A0A087WZE9	9.91	13.948	130	0	0	0	0	0	13.0769	2	2	7300000	2	2	-6.64386
Neurotrophin receptor-interacting factor homolog OS=Homo sapiens GN=ZNF274 PE=1 SV=2	ZNF274	Q96GC6	6.74	74.131	653	0	0	0	0	0	1.07198	1	1	8900000	1	1	-6.64386
Transcriptional repressor protein YY1 OS=Homo sapiens GN=YY1 PE=1 SV=2	YY1	P25490	6.25	44.685	414	0	0	0	0	0	1.93237	1	1	2100000	1	1	-6.64386
Proline-, glutamic acid- and leucine-rich protein 1 (Fragment) OS=Homo sapiens GN=PELP1 PE=1 SV=1	PELP1	I3L1P4	10.68	15.056	148	0	0	0	0	0	39.1892	3	3	8900000	3	3	-6.64386
Late cornified envelope protein 3D OS=Homo sapiens GN=LCE3D PE=2 SV=1	LCE3D	Q9BYE3	8.59	9.437	92	0	0	0	0	0	20.6522	1	1	8900000	1	1	-6.64386
Centrosomal protein of 290 kDa OS=Homo sapiens GN=CEP290 PE=1 SV=1	CEP290	J3KNF5	5.95	290.365	2481	0	0	0	0	0	0.282144	1	1	8300000	1	1	-6.64386
H/ACA ribonucleoprotein complex subunit 2 OS=Homo sapiens GN=NHP2 PE=1 SV=1	NHP2	Q9NX24	8.22	17.19	153	0	0	0	0	0	12.4183	1	1	11000000	2	2	-6.64386
Ribosome biogenesis protein WDR12 OS=Homo sapiens GN=WDR12 PE=1 SV=2	WDR12	Q9GZL7	5.9	47.678	423	0	0	0	0	0	4.01891	1	1		1	1	-6.64386
Carnitine O-palmitoyltransferase 1, liver isoform OS=Homo sapiens GN=CPT1A PE=1 SV=2	CPT1A	P50416	8.65	88.311	773	0	0	0	0	0	1.81113	1	1	7300000	1	1	-6.64386
Isoform PKP3b of Plakophilin-3 OS=Homo sapiens GN=PKP3	PKP3	Q9Y446-2	9.42	88.601	812	0	0	0	0	0	1.23153	1	1	5000000	1	1	-6.64386
Protein IGHV3OR15-7 (Fragment) OS=Homo sapiens GN=IGHV3OR15-7 PE=1 SV=1	IGHV3OR15-7	A0A075B7D8	8.28	13.072	119	0	0	0	0	0	9.2437	1	1	9300000	1	1	-6.64386
Phosphoglycerate mutase 1 OS=Homo sapiens GN=PGAM1 PE=1 SV=2	PGAM1	P18669	7.18	28.786	254	0	0	0	0	0	4.72441	1	1	6500000	1	1	-6.64386
Torsin-1A-interacting protein 1 OS=Homo sapiens GN=TOR1AIP1 PE=1 SV=1	TOR1AIP1	J3KN66	7.9	67.781	599	0	0	0	0	0	1.5025	1	1	2800000	1	1	-6.64386
Glucosidase 2 subunit beta OS=Homo sapiens GN=PRKCSH PE=1 SV=1	PRKCSH	K7ELL7	4.41	60.154	535	0	0	0	0	0	4.11215	2	2	1500000	2	2	-6.64386
Mediator of DNA damage checkpoint protein 1 OS=Homo sapiens GN=MDC1 PE=1 SV=3	MDC1	Q14676	5.47	226.529	2089	0	0	0	0	0	0.430828	1	1		1	1	-6.64386
Paired amphipathic helix protein Sin3a OS=Homo sapiens GN=SIN3A PE=1 SV=2	SIN3A	Q96ST3	7.25	145.085	1273	0	0	0	0	0	0.549882	1	1	1100000	1	1	-6.64386
Nuclear factor 1 B-type OS=Homo sapiens GN=NFIB PE=1 SV=1	NFIB	Q5VW30	8.78	62.578	561	0	0	0	0	0	1.96078	1	1	15000000	1	1	-6.64386
40S ribosomal protein S28 OS=Homo sapiens GN=RPS28 PE=1 SV=1	RPS28	P62857	10.7	7.836	69	0	0	0	0	0	17.3913	1	1		1	1	-6.64386
Ig lambda chain V-I region BL2 OS=Homo sapiens PE=2 SV=1	NOGENE	P06316	7.77	13.556	130	0	0	0	0	0	6.15385	1	1	280000000	1	1	-6.64386
Alpha-mannosidase 2 OS=Homo sapiens GN=MAN2A1 PE=1 SV=2	MAN2A1	Q16706	7.58	131.057	1144	0	0	0	0	0	0.961538	1	1	4800000	1	1	-6.64386
Isoform 2 of AP-4 complex subunit sigma-1 OS=Homo sapiens GN=AP4S1	AP4S1	Q9Y587-2	5.15	18.552	159	0	0	0	0	0	20.7547	1	1		1	1	-6.64386
WD repeat-containing protein 43 OS=Homo sapiens GN=WDR43 PE=1 SV=3	WDR43	Q15061	5.57	74.843	677	0	0	0	0	0	1.62482	1	1		1	1	-6.64386
NudC domain-containing protein 1 OS=Homo sapiens GN=NUDCD1 PE=1 SV=1	NUDCD1	E5RHQ3	6	9.395	79	0	0	0	0	0	13.9241	1	1	65000000	1	1	-6.64386
Lysozyme C OS=Homo sapiens GN=LYZ PE=1 SV=1	LYZ	P61626	9.16	16.526	148	0	0	0	0	0	8.10811	1	1	7800000	1	1	-6.64386
Dolichyl-diphosphooligosaccharide--protein glycosyltransferase subunit 2 OS=Homo sapiens GN=RPN2 PE=1 SV=3	RPN2	P04844	5.69	69.241	631	0	0	0	0	0	6.18067	2	2	14000000	3	3	-6.64386
Testis-expressed sequence 10 protein OS=Homo sapiens GN=TEX10 PE=1 SV=2	TEX10	Q9NXF1	9.36	105.608	929	0	0	0	0	0	1.93757	1	1	14000000	1	1	-6.64386
EGF-containing fibulin-like extracellular matrix protein 1 OS=Homo sapiens GN=EFEMP1 PE=1 SV=2	EFEMP1	Q12805	5.07	54.604	493	0	0	0	0	0	1.82556	1	1	15000000	1	1	-6.64386
Pre-mRNA-splicing factor 38B OS=Homo sapiens GN=PRPF38B PE=1 SV=1	PRPF38B	Q5VTL8	10.54	64.429	546	0	0	0	0	0	3.663	2	2	1500000	2	2	-6.64386
UDP-glucose:glycoprotein glucosyltransferase 2 OS=Homo sapiens GN=UGGT2 PE=1 SV=4	glycoprotein	Q9NYU1	6.89	174.624	1516	0	0	0	0	0	0.461741	1	1	340000000	1	1	-6.64386
PDZ and LIM domain protein 1 OS=Homo sapiens GN=PDLIM1 PE=1 SV=4	PDLIM1	O00151	7.02	36.049	329	0	0	0	0	0	4.55927	1	1		1	1	-6.64386
Exportin-2 OS=Homo sapiens GN=CSE1L PE=1 SV=3	CSE1L	P55060	5.77	110.346	971	0	0	0	0	0	1.5448	1	1		1	1	-6.64386
CCAAT/enhancer-binding protein zeta OS=Homo sapiens GN=CEBPZ PE=1 SV=3	CEBPZ	Q03701	5.94	120.898	1054	0	0	0	0	0	1.6129	1	1	4500000	1	1	-6.64386
Proteasome subunit alpha type-5 OS=Homo sapiens GN=PSMA5 PE=1 SV=3	PSMA5	P28066	4.79	26.394	241	0	0	0	0	0	7.88382	1	1	4600000	1	1	-6.64386
Isoform 6 of Zinc finger protein 185 OS=Homo sapiens GN=ZNF185	ZNF185	O15231-6	7.05	76.81	721	0	0	0	0	0	4.29958	1	1		1	1	-6.64386
Alcohol dehydrogenase class-3 OS=Homo sapiens GN=ADH5 PE=1 SV=4	ADH5	P11766	7.49	39.698	374	0	0	0	0	0	4.54545	1	1		1	1	-6.64386
Protein SCAF11 OS=Homo sapiens GN=SCAF11 PE=1 SV=2	SCAF11	Q99590	8.41	164.551	1463	0	0	0	0	0	1.70882	1	1	15000000	1	1	-6.64386
Periplakin OS=Homo sapiens GN=PPL PE=1 SV=4	PPL	O60437	5.6	204.623	1756	0	0	0	0	0	1.13895	1	1	5800000	3	3	-6.64386
Isoform 1 of Voltage-dependent anion-selective channel protein 2 OS=Homo sapiens GN=VDAC2	VDAC2	P45880-1	7.59	33.351	309	0	0	0	0	0	10.356	2	2	9600000	2	2	-6.64386
Isoform 1 of Protein POF1B OS=Homo sapiens GN=POF1B	POF1B	Q8WVV4-1	6.35	68.653	595	0	0	0	0	0	19.6639	9	9	36000000	12	12	-6.64386
Protein S100-A2 OS=Homo sapiens GN=S100A2 PE=1 SV=3	S100A2	P29034	4.78	11.109	98	0	0	0	0	0	16.3265	1	1		1	1	-6.64386
ATP synthase subunit gamma, mitochondrial OS=Homo sapiens GN=ATP5C1 PE=1 SV=1	ATP5C1	P36542	9.22	32.975	298	0	0	0	0	0	3.3557	1	1	8600000	1	1	-6.64386
Carboxypeptidase A4 OS=Homo sapiens GN=CPA4 PE=1 SV=2	CPA4	Q9UI42	6.7	47.322	421	0	0	0	0	0	2.3753	1	1	3200000	1	1	-6.64386
Sodium/potassium-transporting ATPase subunit alpha-3 OS=Homo sapiens GN=ATP1A3 PE=1 SV=1	ATP1A3	M0R116	5.27	108.209	983	0	0	0	0	0	0.813835	1	1		1	1	-6.64386
Carbonyl reductase [NADPH] 3 OS=Homo sapiens GN=CBR3 PE=1 SV=3	CBR3	O75828	6.18	30.831	277	0	0	0	0	0	5.77617	1	1	6600000	1	1	-6.64386
Eukaryotic translation initiation factor 5B OS=Homo sapiens GN=EIF5B PE=1 SV=1	EIF5B	A0A087WUT6	5.58	138.597	1220	0	0	0	0	0	0.655738	1	1	8400000	1	1	-6.64386
Translation initiation factor eIF-2B subunit delta OS=Homo sapiens GN=EIF2B4 PE=1 SV=1	EIF2B4	A0A087WTA5	9.38	57.46	520	0	0	0	0	0	2.69231	1	1	3200000	1	1	-6.64386
Trifunctional enzyme subunit beta, mitochondrial OS=Homo sapiens GN=HADHB PE=1 SV=3	HADHB	P55084	9.41	51.262	474	0	0	0	0	0	1.89873	1	1	12000000	1	1	-6.64386
Cell growth-regulating nucleolar protein OS=Homo sapiens GN=LYAR PE=1 SV=2	LYAR	Q9NX58	9.54	43.588	379	0	0	0	0	0	2.37467	1	1	1700000	1	1	-6.64386
Copper-transporting ATPase 2 OS=Homo sapiens GN=ATP7B PE=1 SV=4	ATP7B	P35670	6.7	157.162	1465	0	0	0	0	0	0.477816	1	1	44000000	1	1	-6.64386
Synaptic vesicle membrane protein VAT-1 homolog OS=Homo sapiens GN=VAT1 PE=1 SV=2	VAT1	Q99536	6.29	41.893	393	0	0	0	0	0	3.56234	1	1		2	2	-6.64386
Serpin B5 OS=Homo sapiens GN=SERPINB5 PE=1 SV=2	SERPINB5	P36952	6.05	42.073	375	0	0	0	0	0	15.4667	5	5	11000000	5	5	-6.64386
Ig heavy chain V-II region HE OS=Homo sapiens PE=1 SV=1	NOGENE	P01818	8.5	13.475	121	0	0	0	0	0	7.43802	1	1	410000000	2	2	-6.64386
Translation machinery-associated protein 7 OS=Homo sapiens GN=TMA7 PE=1 SV=1	TMA7	Q9Y2S6	9.99	7.062	64	0	0	0	0	0	12.5	1	1	5500000	1	1	-6.64386
Lipase maturation factor 2 OS=Homo sapiens GN=LMF2 PE=1 SV=2	LMF2	Q9BU23	10.1	79.647	707	0	0	0	0	0	2.54597	1	1		1	1	-6.64386
Cysteine-rich C-terminal protein 1 OS=Homo sapiens GN=CRCT1 PE=2 SV=1	CRCT1	Q9UGL9	8.66	9.729	99	0	0	0	0	0	13.1313	1	1	2800000	1	1	-6.64386
Activity-dependent neuroprotector homeobox protein OS=Homo sapiens GN=ADNP PE=1 SV=1	ADNP	Q9H2P0	7.34	123.485	1102	0	0	0	0	0	0.907441	1	1		1	1	-6.64386
Neugrin OS=Homo sapiens GN=NGRN PE=1 SV=2	NGRN	Q9NPE2	9.1	32.388	291	0	0	0	0	0	2.74914	1	1	4300000	1	1	-6.64386
Transcription elongation factor SPT5 OS=Homo sapiens GN=SUPT5H PE=1 SV=1	SUPT5H	A0A0A0MSV0	5.05	120.953	1087	0	0	0	0	0	0.919963	1	1	6200000	1	1	-6.64386
Ig alpha-1 chain C region OS=Homo sapiens GN=IGHA1 PE=1 SV=2	IGHA1	P01876	6.51	37.631	353	0	0	0	0	0	5.38244	2	2	250000000	2	2	-6.64386
Ribosomal RNA small subunit methyltransferase NEP1 OS=Homo sapiens GN=EMG1 PE=1 SV=4	EMG1	Q92979	9.17	26.703	244	0	0	0	0	0	8.19672	1	1		1	1	-6.64386
Ribosome biogenesis protein BOP1 OS=Homo sapiens GN=BOP1 PE=1 SV=2	BOP1	Q14137	6.19	83.577	746	0	0	0	0	0	1.34048	1	1	2000000	1	1	-6.64386
Glucose-6-phosphate isomerase (Fragment) OS=Homo sapiens GN=GPI PE=1 SV=1	GPI	A0A0A0MTS2	9.04	64.784	573	0	0	0	0	0	2.6178	1	1	25000000	1	1	-6.64386
Galectin-3 OS=Homo sapiens GN=LGALS3 PE=1 SV=5	LGALS3	P17931	8.56	26.136	250	0	0	0	0	0	4.4	1	1	13000000	1	1	-6.64386
Protein S100-A14 OS=Homo sapiens GN=S100A14 PE=1 SV=1	S100A14	Q9HCY8	5.24	11.655	104	0	0	0	0	0	25	2	2	18000000	2	2	-6.64386
Sideroflexin-1 OS=Homo sapiens GN=SFXN1 PE=1 SV=4	SFXN1	Q9H9B4	9.07	35.596	322	0	0	0	0	0	4.03727	1	1	3300000	1	1	-6.64386
Serpin B4 OS=Homo sapiens GN=SERPINB4 PE=1 SV=2	SERPINB4	P48594	6.21	44.825	390	0	0	0	0	0	11.2821	5	5	28000000	5	5	-6.64386
Lipocalin-1 OS=Homo sapiens GN=LCN1 PE=1 SV=1	LCN1	P31025	5.58	19.238	176	0	0	0	0	0	6.25	1	1	4200000	1	1	-6.64386
Exosome complex exonuclease RRP44 OS=Homo sapiens GN=DIS3 PE=1 SV=2	DIS3	Q9Y2L1	7.14	108.934	958	0	0	0	0	0	0.939457	1	1		1	1	-6.64386
Proliferation-associated protein 2G4 OS=Homo sapiens GN=PA2G4 PE=1 SV=3	PA2G4	Q9UQ80	6.55	43.759	394	0	0	0	0	0	4.31472	1	1		1	1	-6.64386
40S ribosomal protein S30 OS=Homo sapiens GN=FAU PE=1 SV=1	FAU	E9PR30	11.56	10.898	98	0	0	0	0	0	10.2041	1	1	150000000	1	1	-6.64386
Isoform 2 of Splicing regulatory glutamine/lysine-rich protein 1 OS=Homo sapiens GN=SREK1	SREK1	Q8WXA9-2	10.2	71.606	624	0	0	0	0	0	1.28205	1	1	2500000	1	1	-6.64386
Nuclear cap-binding protein subunit 2 OS=Homo sapiens GN=NCBP2 PE=1 SV=1	NCBP2	P52298	8.21	17.99	156	0	0	0	0	0	5.12821	1	1		1	1	-6.64386
Niemann-Pick C1 protein OS=Homo sapiens GN=NPC1 PE=1 SV=2	NPC1	O15118	5.36	142.074	1278	0	0	0	0	0	0.547731	1	1	10000000	1	1	-6.64386
Tripartite motif-containing protein 29 OS=Homo sapiens GN=TRIM29 PE=1 SV=2	TRIM29	Q14134	7.15	65.793	588	0	0	0	0	0	4.08163	2	2	4800000	2	2	-6.64386
RNA-binding protein 12B OS=Homo sapiens GN=RBM12B PE=1 SV=2	RBM12B	Q8IXT5	6.81	118.03	1001	0	0	0	0	0	0.899101	1	1		1	1	-6.64386
Small nuclear ribonucleoprotein Sm D1 OS=Homo sapiens GN=SNRPD1 PE=1 SV=1	SNRPD1	J3QLI9	11.84	8.388	75	0	0	0	0	0	17.3333	1	1		1	1	-6.64386
Pleckstrin homology domain-containing family D member 1 OS=Homo sapiens GN=PLEKHD1 PE=2 SV=3	PLEKHD1	A6NEE1	6.44	59.166	506	0	0	0	0	0	1.58103	1	1	4500000	1	1	-6.64386
Superkiller viralicidic activity 2-like 2 OS=Homo sapiens GN=SKIV2L2 PE=1 SV=3	SKIV2L2	P42285	6.52	117.729	1042	0	0	0	0	0	1.05566	1	1		1	1	-6.64386
PHD finger protein 6 OS=Homo sapiens GN=PHF6 PE=1 SV=1	PHF6	Q8IWS0	8.68	41.264	365	0	0	0	0	0	3.83562	1	1	2200000	1	1	-6.64386
Protein polybromo-1 OS=Homo sapiens GN=PBRM1 PE=1 SV=1	PBRM1	Q86U86	6.89	192.825	1689	0	0	0	0	0	1.24334	1	1	2000000	1	1	-6.64386
ERO1-like protein alpha OS=Homo sapiens GN=ERO1L PE=1 SV=2	ERO1L	Q96HE7	5.68	54.358	468	0	0	0	0	0	2.99145	1	1		1	1	-6.64386
Sulfhydryl oxidase 1 OS=Homo sapiens GN=QSOX1 PE=1 SV=3	QSOX1	O00391	8.92	82.526	747	0	0	0	0	0	0.937082	1	1	60000000	1	1	-6.64386
Insulin-like growth factor-binding protein 4 OS=Homo sapiens GN=IGFBP4 PE=1 SV=2	IGFBP4	P22692	7.15	27.915	258	0	0	0	0	0	3.87597	1	1	2800000	1	1	-6.64386
Voltage-dependent anion-selective channel protein 1 OS=Homo sapiens GN=VDAC1 PE=1 SV=2	VDAC1	P21796	8.54	30.754	283	0	0	0	0	0	6.36042	2	2	9100000	3	3	-6.64386
Kelch-like protein 29 OS=Homo sapiens GN=KLHL29 PE=2 SV=3	KLHL29	Q96CT2	7.17	94.169	875	0	0	0	0	0	1.82857	1	1		1	1	-6.64386
Protein MAK16 homolog OS=Homo sapiens GN=MAK16 PE=1 SV=2	MAK16	Q9BXY0	5.38	35.347	300	0	0	0	0	0	4.33333	1	1	14000000	1	1	-6.64386
HCG2039996 OS=Homo sapiens GN=PPAN-P2RY11 PE=1 SV=1	PPAN-P2RY11	A0A0B4J1V8	9.51	87.862	794	0	0	0	0	0	3.02267	2	2	3200000	2	2	-6.64386
Thioredoxin-related transmembrane protein 1 OS=Homo sapiens GN=TMX1 PE=1 SV=1	TMX1	G3V448	4.41	11.904	105	0	0	0	0	0	11.4286	1	1	3200000	1	1	-6.64386
Guanine nucleotide-binding protein-like 3 OS=Homo sapiens GN=GNL3 PE=1 SV=2	GNL3	Q9BVP2	9.16	61.954	549	0	0	0	0	0	6.37523	2	2	14000000	2	2	-6.64386

## Sheet: Cu
Description	GENE	Accession	CalcPI	#AA	MW[kDA]	Coverage	#Peptide	#UniquePeptides	Area	#PSMs	Coverage	#Peptide	#UniquePeptides	Area	#PSMs	Sum PSMs	Log2 Ratio IP/PEP PSMS
Protein transport protein Sec16A OS=Homo sapiens GN=SEC16A PE=1 SV=1	SEC16A	J3KNL6	5.8	251.738	2357	60.0339	93	4	5300000000	465	2.96988	2	2	64000000	4	469	6.86109
Serine/threonine-protein kinase SMG1 OS=Homo sapiens GN=SMG1 PE=1 SV=3	SMG1	Q96Q15	6.46	410.241	3661	7.07457	19	19	31000000	19	0	0	0	0	0	19	6.62936
Gamma-tubulin complex component 4 OS=Homo sapiens GN=TUBGCP4 PE=1 SV=1	TUBGCP4	Q9UGJ1	6.65	76.041	667	8.3958	3	3	31000000	4	0	0	0	0	0	4	6.62936
Conserved oligomeric Golgi complex subunit 7 OS=Homo sapiens GN=COG7 PE=1 SV=1	COG7	P83436	5.47	86.289	770	2.07792	1	1	13000000	1	0	0	0	0	0	1	6.62936
Eukaryotic translation initiation factor 4E type 2 OS=Homo sapiens GN=EIF4E2 PE=1 SV=1	EIF4E2	B9A023	7.03	21.899	189	46.5608	7	7	92000000	10	0	0	0	0	0	10	6.62936
DNA topoisomerase 3-beta-1 OS=Homo sapiens GN=TOP3B PE=2 SV=1	TOP3B	O95985	8.12	96.599	862	10.2088	7	7	22000000	7	0	0	0	0	0	7	6.62936
TIP41-like protein OS=Homo sapiens GN=TIPRL PE=1 SV=2	TIPRL	O75663	5.91	31.424	272	4.41176	1	1	6100000	1	0	0	0	0	0	1	6.62936
Survival motor neuron protein OS=Homo sapiens GN=SMN1 PE=1 SV=1	SMN1	E7EQZ4	5.71	31.669	294	17.0068	4	4	30000000	4	0	0	0	0	0	4	6.62936
Caspase-3 OS=Homo sapiens GN=CASP3 PE=1 SV=2	CASP3	A8MVM1	7.81	20.495	182	6.04396	1	1		1	0	0	0	0	0	1	6.62936
Isoform 2 of Dynactin subunit 2 OS=Homo sapiens GN=DCTN2	DCTN2	Q13561-2	5.17	44.792	406	21.4286	6	6	94000000	8	0	0	0	0	0	8	6.62936
Fidgetin-like protein 1 OS=Homo sapiens GN=FIGNL1 PE=1 SV=2	FIGNL1	Q6PIW4	7.85	74.03	674	1.78042	1	1	17000000	1	0	0	0	0	0	1	6.62936
ATP synthase subunit g, mitochondrial OS=Homo sapiens GN=ATP5L PE=1 SV=3	ATP5L	O75964	9.64	11.421	103	12.6214	1	1	7400000	1	0	0	0	0	0	1	6.62936
R3H domain-containing protein 2 OS=Homo sapiens GN=R3HDM2 PE=1 SV=2	R3HDM2	B5MCG9	8.81	110.571	1010	0.792079	1	1	350000	1	0	0	0	0	0	1	6.62936
Regulator of nonsense transcripts 3B OS=Homo sapiens GN=UPF3B PE=1 SV=1	UPF3B	A0A087WYC8	8.57	25.217	217	38.7097	7	7	140000000	8	0	0	0	0	0	8	6.62936
Eukaryotic translation initiation factor 3 subunit K OS=Homo sapiens GN=EIF3K PE=1 SV=1	EIF3K	K7ES31	6.74	15.865	137	31.3869	3	3	92000000	5	0	0	0	0	0	5	6.62936
Regulator of nonsense transcripts 2 OS=Homo sapiens GN=UPF2 PE=1 SV=1	UPF2	Q9HAU5	5.69	147.717	1272	27.1226	28	28	200000000	46	0	0	0	0	0	46	6.62936
Dynamin-2 OS=Homo sapiens GN=DNM2 PE=1 SV=2	DNM2	P50570	7.44	98.003	870	6.78161	4	4	48000000	4	0	0	0	0	0	4	6.62936
Vitronectin OS=Homo sapiens GN=VTN PE=1 SV=1	VTN	P04004	5.8	54.271	478	3.13808	1	1	9900000	1	0	0	0	0	0	1	6.62936
U6 snRNA-associated Sm-like protein LSm2 OS=Homo sapiens GN=LSM2 PE=1 SV=1	LSM2	Q9Y333	6.52	10.828	95	40	2	2	22000000	2	0	0	0	0	0	2	6.62936
Isoform 2 of SRSF protein kinase 2 OS=Homo sapiens GN=SRPK2	SRPK2	P78362-2	5.22	78.979	699	1.71674	1	1	23000000	1	0	0	0	0	0	1	6.62936
Cytoplasmic dynein 1 light intermediate chain 1 OS=Homo sapiens GN=DYNC1LI1 PE=1 SV=3	DYNC1LI1	Q9Y6G9	6.42	56.544	523	3.25048	1	1	370000000	1	0	0	0	0	0	1	6.62936
Odorant-binding protein 2a OS=Homo sapiens GN=OBP2A PE=4 SV=1	OBP2A	A0A087WXL2	9.5	24.781	220	3.63636	1	1	460000000	1	0	0	0	0	0	1	6.62936
Isoform 4 of Kinesin-like protein KIF21A OS=Homo sapiens GN=KIF21A	KIF21A	Q7Z4S6-4	6.42	187.15	1675	0.895522	1	1	13000000	1	0	0	0	0	0	1	6.62936
Coiled-coil domain-containing protein 18 (Fragment) OS=Homo sapiens GN=CCDC18 PE=1 SV=1	CCDC18	J3KP97	5.71	174.784	1508	0.928382	1	1	2300000000	1	0	0	0	0	0	1	6.62936
WAS protein family homolog 1 OS=Homo sapiens GN=WASH1 PE=1 SV=2	WASH1	A8K0Z3	5.68	50.297	465	3.87097	1	1		1	0	0	0	0	0	1	6.62936
Glycogen phosphorylase, brain form OS=Homo sapiens GN=PYGB PE=1 SV=5	PYGB	P11216	6.86	96.635	843	2.9656	3	3	4800000	3	0	0	0	0	0	3	6.62936
Cleavage stimulation factor subunit 3 OS=Homo sapiens GN=CSTF3 PE=1 SV=1	CSTF3	Q12996	8.12	82.869	717	21.06	7	7	60000000	14	0	0	0	0	0	14	6.62936
Insulin receptor substrate 2 OS=Homo sapiens GN=IRS2 PE=1 SV=2	IRS2	Q9Y4H2	8.65	137.249	1338	1.86846	1	1		1	0	0	0	0	0	1	6.62936
C-terminal-binding protein 1 OS=Homo sapiens GN=CTBP1 PE=1 SV=2	CTBP1	Q13363	6.77	47.505	440	2.27273	1	1		1	0	0	0	0	0	1	6.62936
Histidine triad nucleotide-binding protein 1 OS=Homo sapiens GN=HINT1 PE=1 SV=2	HINT1	P49773	6.95	13.793	126	11.1111	1	1		1	0	0	0	0	0	1	6.62936
Signal transducer and activator of transcription 3 OS=Homo sapiens GN=STAT3 PE=1 SV=2	STAT3	P40763	6.3	88.011	770	3.37662	1	1	25000000	2	0	0	0	0	0	2	6.62936
RNA-binding protein MEX3A OS=Homo sapiens GN=MEX3A PE=1 SV=1	MEX3A	A1L020	7.27	54.139	520	49.4231	17	17	270000000	29	0	0	0	0	0	29	6.62936
Integrin-linked kinase-associated serine/threonine phosphatase 2C OS=Homo sapiens GN=ILKAP PE=1 SV=1	ILKAP	Q9H0C8	7.09	42.88	392	2.04082	1	1	5300000	1	0	0	0	0	0	1	6.62936
p53 and DNA damage-regulated protein 1 OS=Homo sapiens GN=PDRG1 PE=1 SV=2	PDRG1	Q9NUG6	6.06	15.501	133	18.0451	2	2	140000000	3	0	0	0	0	0	3	6.62936
E3 ubiquitin-protein ligase ARIH1 OS=Homo sapiens GN=ARIH1 PE=1 SV=2	ARIH1	Q9Y4X5	5.08	64.076	557	2.51346	1	1		1	0	0	0	0	0	1	6.62936
Platelet-activating factor acetylhydrolase IB subunit beta OS=Homo sapiens GN=PAFAH1B2 PE=1 SV=1	PAFAH1B2	P68402	5.92	25.553	229	3.93013	1	1		1	0	0	0	0	0	1	6.62936
Isoform 2 of Cullin-7 OS=Homo sapiens GN=CUL7	CUL7	Q14999-2	5.97	199.625	1782	1.29068	1	1	74000000	1	0	0	0	0	0	1	6.62936
Protein deglycase DJ-1 OS=Homo sapiens GN=PARK7 PE=1 SV=2	PARK7	Q99497	6.79	19.878	189	8.46561	1	1	41000000	2	0	0	0	0	0	2	6.62936
Partitioning defective 3 homolog OS=Homo sapiens GN=PARD3 PE=1 SV=2	PARD3	Q8TEW0	7.68	151.33	1356	1.69617	2	2	11000000	2	0	0	0	0	0	2	6.62936
PDZ and LIM domain protein 7 OS=Homo sapiens GN=PDLIM7 PE=1 SV=1	PDLIM7	Q9NR12	8.41	49.813	457	2.84464	1	1	16000000	1	0	0	0	0	0	1	6.62936
FK506-binding protein 15 (Fragment) OS=Homo sapiens GN=FKBP15 PE=1 SV=1	FKBP15	A0A0A0MT60	5.21	136.189	1244	2.00965	1	1	23000000	1	0	0	0	0	0	1	6.62936
EPM2A-interacting protein 1 OS=Homo sapiens GN=EPM2AIP1 PE=1 SV=1	EPM2AIP1	Q7L775	6.11	70.325	607	8.23723	3	3	8500000	4	0	0	0	0	0	4	6.62936
Nucleolysin TIA-1 isoform p40 OS=Homo sapiens GN=TIA1 PE=1 SV=3	TIA1	P31483	7.74	42.936	386	7.77202	3	3	40000000	3	0	0	0	0	0	3	6.62936
Protein NDNF OS=Homo sapiens GN=NDNF PE=2 SV=2	NDNF	Q8TB73	8.94	64.632	568	2.99296	1	1	4000000	1	0	0	0	0	0	1	6.62936
Eukaryotic translation initiation factor 3 subunit G OS=Homo sapiens GN=EIF3G PE=1 SV=2	EIF3G	O75821	6.13	35.589	320	25.3125	7	7	130000000	8	0	0	0	0	0	8	6.62936
Protein PRRC2B OS=Homo sapiens GN=PRRC2B PE=1 SV=2	PRRC2B	Q5JSZ5	8.34	242.817	2229	2.5572	4	3	70000000	6	0	0	0	0	0	6	6.62936
SURP and G-patch domain-containing protein 2 OS=Homo sapiens GN=SUGP2 PE=1 SV=1	SUGP2	M0R2Z9	7.4	121.468	1096	2.37226	2	2	4900000	2	0	0	0	0	0	2	6.62936
ATP-binding cassette sub-family D member 3 OS=Homo sapiens GN=ABCD3 PE=1 SV=1	ABCD3	P28288	9.36	75.428	659	1.82094	1	1		1	0	0	0	0	0	1	6.62936
Cytoplasmic dynein 1 light intermediate chain 2 OS=Homo sapiens GN=DYNC1LI2 PE=1 SV=1	DYNC1LI2	O43237	6.38	54.066	492	3.25203	1	1	8500000	1	0	0	0	0	0	1	6.62936
Dual specificity protein kinase CLK3 OS=Homo sapiens GN=CLK3 PE=1 SV=3	CLK3	P49761	9.92	73.469	638	1.41066	1	1		1	0	0	0	0	0	1	6.62936
Putative RNA-binding protein 15 OS=Homo sapiens GN=RBM15 PE=1 SV=2	RBM15	Q96T37	10.08	107.124	977	1.94473	1	1	16000000	1	0	0	0	0	0	1	6.62936
Rab GDP dissociation inhibitor alpha OS=Homo sapiens GN=GDI1 PE=1 SV=2	GDI1	P31150	5.14	50.55	447	4.25056	1	1		1	0	0	0	0	0	1	6.62936
Isoform 2 of Programmed cell death 6-interacting protein OS=Homo sapiens GN=PDCD6IP	PDCD6IP	Q8WUM4-2	6.52	96.711	873	10.0802	5	5	22000000	5	0	0	0	0	0	5	6.62936
Isoform 2 of Centrosomal protein of 97 kDa OS=Homo sapiens GN=CEP97	CEP97	Q8IW35-2	5.08	99.846	891	11.8967	8	8	27000000	9	0	0	0	0	0	9	6.62936
Protein TFG OS=Homo sapiens GN=TFG PE=1 SV=2	TFG	Q92734	5.1	43.421	400	4.25	1	1	10000000	3	0	0	0	0	0	3	6.62936
SEC23-interacting protein OS=Homo sapiens GN=SEC23IP PE=1 SV=1	SEC23IP	Q9Y6Y8	5.54	111.007	1000	30	19	19	240000000	29	0	0	0	0	0	29	6.62936
Phosphoinositide 3-kinase regulatory subunit 6 OS=Homo sapiens GN=PIK3R6 PE=1 SV=1	PIK3R6	Q5UE93	7.64	84.205	754	1.06101	1	1	97000000	1	0	0	0	0	0	1	6.62936
Isoform 5 of Rap1 GTPase-GDP dissociation stimulator 1 OS=Homo sapiens GN=RAP1GDS1	RAP1GDS1	P52306-5	5.31	66.346	608	12.9934	6	6	73000000	9	0	0	0	0	0	9	6.62936
26S protease regulatory subunit 10B OS=Homo sapiens GN=PSMC6 PE=1 SV=1	PSMC6	P62333	7.49	44.145	389	3.08483	1	1	7000000	1	0	0	0	0	0	1	6.62936
Protein ERGIC-53 OS=Homo sapiens GN=LMAN1 PE=1 SV=2	LMAN1	P49257	6.77	57.513	510	9.41176	3	3	36000000	5	0	0	0	0	0	5	6.62936
Krueppel-like factor 16 OS=Homo sapiens GN=KLF16 PE=1 SV=1	KLF16	Q9BXK1	9.88	25.415	252	6.74603	1	1		1	0	0	0	0	0	1	6.62936
Interferon-inducible double-stranded RNA-dependent protein kinase activator A OS=Homo sapiens GN=PRKRA PE=1 SV=1	PRKRA	O75569	8.41	34.383	313	6.07029	1	1	13000000	1	0	0	0	0	0	1	6.62936
DIS3-like exonuclease 1 OS=Homo sapiens GN=DIS3L PE=1 SV=2	DIS3L	Q8TF46	6.54	120.711	1054	2.08729	2	2	1400000	4	0	0	0	0	0	4	6.62936
CCR4-NOT transcription complex subunit 1 OS=Homo sapiens GN=CNOT1 PE=1 SV=2	CNOT1	A5YKK6	7.11	266.768	2376	8.71212	14	14	64000000	18	0	0	0	0	0	18	6.62936
High density lipoprotein binding protein (Vigilin), isoform CRA_a OS=Homo sapiens GN=HDLBP PE=1 SV=1	HDLBP	A0A024R4E5	6.87	141.352	1268	4.96845	5	5	29000000	5	0	0	0	0	0	5	6.62936
Zinc finger protein 687 OS=Homo sapiens GN=ZNF687 PE=1 SV=1	ZNF687	Q8N1G0	8.19	129.446	1237	0.970089	1	1	1000000	1	0	0	0	0	0	1	6.62936
Fibronectin type III and SPRY domain-containing protein 1 OS=Homo sapiens GN=FSD1 PE=1 SV=1	FSD1	Q9BTV5	6.99	55.784	496	2.21774	1	1	15000000	1	0	0	0	0	0	1	6.62936
Isoform 2 of Zinc finger CCHC domain-containing protein 14 OS=Homo sapiens GN=ZCCHC14	ZCCHC14	Q8WYQ9-2	8.69	101.516	962	4.5738	2	2	16000000	2	0	0	0	0	0	2	6.62936
Putative helicase MOV-10 OS=Homo sapiens GN=MOV10 PE=1 SV=2	MOV10	Q9HCE1	8.82	113.599	1003	7.37787	6	6	43000000	8	0	0	0	0	0	8	6.62936
HIV Tat-specific factor 1 OS=Homo sapiens GN=HTATSF1 PE=1 SV=1	HTATSF1	O43719	4.4	85.801	755	1.8543	1	1		1	0	0	0	0	0	1	6.62936
Protein FAM89B OS=Homo sapiens GN=FAM89B PE=1 SV=2	FAM89B	Q8N5H3	5.34	20.135	189	7.93651	1	1	1200000	1	0	0	0	0	0	1	6.62936
F-box-like/WD repeat-containing protein TBL1X OS=Homo sapiens GN=TBL1X PE=1 SV=3	TBL1X	O60907	6.55	62.456	577	2.94627	1	1		1	0	0	0	0	0	1	6.62936
Exosome complex component RRP42 OS=Homo sapiens GN=EXOSC7 PE=1 SV=3	EXOSC7	Q15024	5.19	31.801	291	8.24742	1	1	3800000	1	0	0	0	0	0	1	6.62936
Alcohol dehydrogenase class-3 OS=Homo sapiens GN=ADH5 PE=1 SV=4	ADH5	P11766	7.49	39.698	374	4.54545	1	1		1	0	0	0	0	0	1	6.62936
WASH complex subunit FAM21C OS=Homo sapiens GN=FAM21C PE=1 SV=1	FAM21C	A0A0A0MR88	4.81	146.966	1341	1.78971	2	2	3500000	2	0	0	0	0	0	2	6.62936
Isoform 3 of Coronin-1C OS=Homo sapiens GN=CORO1C	CORO1C	Q9ULV4-3	7.75	58.91	527	4.93359	3	3	31000000	3	0	0	0	0	0	3	6.62936
Conserved oligomeric Golgi complex subunit 6 OS=Homo sapiens GN=COG6 PE=1 SV=2	COG6	Q9Y2V7	5.76	73.233	657	1.52207	1	1	23000000	1	0	0	0	0	0	1	6.62936
Atrial natriuretic peptide receptor 2 OS=Homo sapiens GN=NPR2 PE=1 SV=1	NPR2	P20594	6.87	116.948	1047	0.668577	1	1		1	0	0	0	0	0	1	6.62936
m7GpppN-mRNA hydrolase OS=Homo sapiens GN=DCP2 PE=1 SV=2	DCP2	Q8IU60	8	48.426	420	3.09524	1	1		1	0	0	0	0	0	1	6.62936
Protein transport protein Sec31A OS=Homo sapiens GN=SEC31A PE=1 SV=1	SEC31A	D6RHE8	5.76	10.161	92	18.4783	2	2	140000000	2	0	0	0	0	0	2	6.62936
Proline-rich protein 36 OS=Homo sapiens GN=PRR36 PE=2 SV=2	PRR36	Q9H6K5	10.48	132.667	1346	17.0877	15	15	330000000	22	0	0	0	0	0	22	6.62936
Neuronal migration protein doublecortin OS=Homo sapiens GN=DCX PE=1 SV=3	DCX	O43602	8.95	49.286	441	9.52381	3	2	18000000	3	0	0	0	0	0	3	6.62936
Exosome complex component RRP40 OS=Homo sapiens GN=EXOSC3 PE=1 SV=3	EXOSC3	Q9NQT5	8.1	29.553	275	5.45455	1	1	17000000	1	0	0	0	0	0	1	6.62936
2-aminoethanethiol dioxygenase OS=Homo sapiens GN=ADO PE=1 SV=2	ADO	Q96SZ5	6.04	29.732	270	3.33333	1	1	5400000	1	0	0	0	0	0	1	6.62936
ATP-dependent RNA helicase DDX24 OS=Homo sapiens GN=DDX24 PE=1 SV=1	DDX24	G3V529	8.82	91.424	816	2.81863	2	2	17000000	2	0	0	0	0	0	2	6.62936
39S ribosomal protein L40, mitochondrial OS=Homo sapiens GN=MRPL40 PE=1 SV=1	MRPL40	Q9NQ50	9.63	24.475	206	9.2233	1	1	26000000	1	0	0	0	0	0	1	6.62936
Isoform 2 of Programmed cell death protein 5 OS=Homo sapiens GN=PDCD5	PDCD5	O14737-2	6.93	14.988	129	18.6047	2	2		2	0	0	0	0	0	2	6.62936
Vacuolar protein sorting-associated protein 13C OS=Homo sapiens GN=VPS13C PE=1 SV=1	VPS13C	Q709C8	6.83	422.124	3753	0.612843	2	2	320000000	2	0	0	0	0	0	2	6.62936
TRAF family member-associated NF-kappa-B activator OS=Homo sapiens GN=TANK PE=1 SV=2	TANK	Q92844	5.68	47.786	425	2.58824	1	1		1	0	0	0	0	0	1	6.62936
Protein FAM98A OS=Homo sapiens GN=FAM98A PE=1 SV=1	FAM98A	E9PH82	8.28	34.409	312	17.3077	5	5	96000000	9	0	0	0	0	0	9	6.62936
Uveal autoantigen with coiled-coil domains and ankyrin repeats OS=Homo sapiens GN=UACA PE=1 SV=2	UACA	Q9BZF9	7.03	162.404	1416	0.49435	2	1	39000000	2	0	0	0	0	0	2	6.62936
Stereocilin OS=Homo sapiens GN=STRC PE=2 SV=1	STRC	Q7RTU9	5.41	192.844	1775	0.450704	1	1		1	0	0	0	0	0	1	6.62936
Isoform 4 of Cold shock domain-containing protein E1 OS=Homo sapiens GN=CSDE1	CSDE1	O75534-4	6.52	93.683	844	12.3223	8	8	65000000	14	0	0	0	0	0	14	6.62936
Exosome complex component RRP4 OS=Homo sapiens GN=EXOSC2 PE=1 SV=2	EXOSC2	Q13868	7.5	32.768	293	5.46075	2	2	20000000	2	0	0	0	0	0	2	6.62936
Eukaryotic translation initiation factor 4B OS=Homo sapiens GN=EIF4B PE=1 SV=1	EIF4B	F8VYE9	5.21	20.332	185	21.6216	2	2	23000000	2	0	0	0	0	0	2	6.62936
RING finger protein 214 OS=Homo sapiens GN=RNF214 PE=1 SV=2	RNF214	Q8ND24	6.95	77.619	703	5.9744	2	2	7500000	5	0	0	0	0	0	5	6.62936
PERQ amino acid-rich with GYF domain-containing protein 1 OS=Homo sapiens GN=GIGYF1 PE=1 SV=2	GIGYF1	O75420	5.39	114.531	1035	3.38164	3	3	20000000	3	0	0	0	0	0	3	6.62936
Sentrin-specific protease 3 OS=Homo sapiens GN=SENP3 PE=1 SV=2	SENP3	Q9H4L4	8.56	64.969	574	3.13589	1	1		1	0	0	0	0	0	1	6.62936
Isoform 2 of Acetyl-CoA acetyltransferase, cytosolic OS=Homo sapiens GN=ACAT2	ACAT2	Q9BWD1-2	8.46	44.614	426	18.0751	5	5	29000000	5	0	0	0	0	0	5	6.62936
Exosome complex component CSL4 OS=Homo sapiens GN=EXOSC1 PE=1 SV=1	EXOSC1	B1AMU3	8.56	18.805	170	15.8824	2	2	11000000	3	0	0	0	0	0	3	6.62936
Spermatogenesis-associated protein 5 OS=Homo sapiens GN=SPATA5 PE=1 SV=3	SPATA5	Q8NB90	5.66	97.843	893	1.2318	1	1	6700000	1	0	0	0	0	0	1	6.62936
Trafficking protein particle complex subunit 10 OS=Homo sapiens GN=TRAPPC10 PE=1 SV=2	TRAPPC10	P48553	6.04	142.098	1259	1.50913	1	1		1	0	0	0	0	0	1	6.62936
Eukaryotic translation initiation factor 4H OS=Homo sapiens GN=EIF4H PE=1 SV=5	EIF4H	Q15056	7.23	27.368	248	9.27419	1	1	100000000	1	0	0	0	0	0	1	6.62936
RNA-binding protein fox-1 homolog 1 OS=Homo sapiens GN=RBFOX1 PE=4 SV=1	RBFOX1	F8VZG9	6.1	50.53	466	2.14592	1	1	16000000	1	0	0	0	0	0	1	6.62936
Protein AHNAK2 OS=Homo sapiens GN=AHNAK2 PE=1 SV=2	AHNAK2	Q8IVF2	5.36	616.242	5795	27.61	60	60	530000000	86	0	0	0	0	0	86	6.62936
CCR4-NOT transcription complex subunit 3 OS=Homo sapiens GN=CNOT3 PE=1 SV=1	CNOT3	O75175	6.2	81.822	753	5.04648	2	2	36000000	2	0	0	0	0	0	2	6.62936
Conserved oligomeric Golgi complex subunit 4 OS=Homo sapiens GN=COG4 PE=1 SV=1	COG4	A0A0A0MS45	5.24	87.128	768	2.60417	2	2	13000000	2	0	0	0	0	0	2	6.62936
Nucleoporin NDC1 OS=Homo sapiens GN=NDC1 PE=1 SV=2	NDC1	Q9BTX1	9.09	76.255	674	1.78042	1	1		1	0	0	0	0	0	1	6.62936
Translocation protein SEC63 homolog OS=Homo sapiens GN=SEC63 PE=1 SV=2	SEC63	Q9UGP8	5.31	87.942	760	1.97368	1	1	8800000	1	0	0	0	0	0	1	6.62936
HEAT repeat-containing protein 1 OS=Homo sapiens GN=HEATR1 PE=1 SV=3	HEATR1	Q9H583	6.54	242.215	2144	1.86567	2	2		2	0	0	0	0	0	2	6.62936
Prefoldin subunit 6 OS=Homo sapiens GN=PFDN6 PE=1 SV=1	PFDN6	O15212	8.88	14.574	129	57.3643	5	5	93000000	5	0	0	0	0	0	5	6.62936
Isoform 2 of Transketolase OS=Homo sapiens GN=TKT	TKT	P29401-2	7.52	68.77	631	1.42631	1	1	18000000	1	0	0	0	0	0	1	6.62936
Unconventional myosin-X OS=Homo sapiens GN=MYO10 PE=1 SV=1	MYO10	A0A0A0MQX1	6.14	238.368	2069	0.724988	1	1	230000000	1	0	0	0	0	0	1	6.62936
Zinc finger Ran-binding domain-containing protein 2 OS=Homo sapiens GN=ZRANB2 PE=4 SV=1	ZRANB2	A0A0C4DGV5	8.75	38.2	337	3.26409	1	1		1	0	0	0	0	0	1	6.62936
pre-mRNA 3' end processing protein WDR33 OS=Homo sapiens GN=WDR33 PE=1 SV=2	WDR33	Q9C0J8	9.17	145.799	1336	0.823353	1	1	8200000	1	0	0	0	0	0	1	6.62936
Coiled-coil domain-containing protein KIAA1407 OS=Homo sapiens GN=KIAA1407 PE=2 SV=1	KIAA1407	Q8NCU4	9.6	110.499	936	0.854701	1	1	35000000	1	0	0	0	0	0	1	6.62936
YTH domain-containing family protein 3 OS=Homo sapiens GN=YTHDF3 PE=1 SV=1	YTHDF3	A0A087X0Q1	9.04	63.636	583	24.1852	9	7	160000000	11	0	0	0	0	0	11	6.62936
Transmembrane and coiled-coil domain-containing protein 1 OS=Homo sapiens GN=TMCO1 PE=1 SV=1	TMCO1	Q9UM00	9.74	21.161	188	7.97872	1	1	10000000	1	0	0	0	0	0	1	6.62936
Mitogen-activated protein kinase 1 OS=Homo sapiens GN=MAPK1 PE=1 SV=3	MAPK1	P28482	6.98	41.363	360	2.5	1	1		1	0	0	0	0	0	1	6.62936
Eukaryotic translation initiation factor 3 subunit A OS=Homo sapiens GN=EIF3A PE=1 SV=1	EIF3A	Q14152	6.79	166.468	1382	30.5355	33	33	330000000	59	0	0	0	0	0	59	6.62936
Formin-binding protein 1-like OS=Homo sapiens GN=FNBP1L PE=1 SV=1	FNBP1L	S4R347	6.64	70.482	609	0.985222	1	1	5600000	1	0	0	0	0	0	1	6.62936
Activating signal cointegrator 1 complex subunit 2 OS=Homo sapiens GN=ASCC2 PE=1 SV=3	ASCC2	Q9H1I8	5.16	86.306	757	1.84941	1	1	14000000	1	0	0	0	0	0	1	6.62936
Protein phosphatase 1G OS=Homo sapiens GN=PPM1G PE=1 SV=1	PPM1G	O15355	4.36	59.235	546	2.01465	1	1	81000000	1	0	0	0	0	0	1	6.62936
Dolichyl-diphosphooligosaccharide--protein glycosyltransferase subunit STT3A OS=Homo sapiens GN=STT3A PE=1 SV=2	STT3A	P46977	8.07	80.477	705	2.97872	2	2	3100000	2	0	0	0	0	0	2	6.62936
Pleiotropic regulator 1 OS=Homo sapiens GN=PLRG1 PE=1 SV=1	PLRG1	O43660	9.17	57.158	514	12.4514	3	3	6600000	7	0	0	0	0	0	7	6.62936
Isoform 5 of C2 domain-containing protein 5 OS=Homo sapiens GN=C2CD5	C2CD5	Q86YS7-5	6.24	116.394	1054	0.948767	1	1		1	0	0	0	0	0	1	6.62936
Exportin-5 OS=Homo sapiens GN=XPO5 PE=1 SV=1	XPO5	Q9HAV4	5.8	136.222	1204	1.49502	2	2	8900000	2	0	0	0	0	0	2	6.62936
Coatomer subunit beta OS=Homo sapiens GN=COPB1 PE=1 SV=3	COPB1	P53618	6.05	107.074	953	4.82686	3	3	24000000	3	0	0	0	0	0	3	6.62936
Isoform 4 of 26S proteasome non-ATPase regulatory subunit 6 OS=Homo sapiens GN=PSMD6	PSMD6	Q15008-4	6.74	51.889	442	3.39367	1	1		1	0	0	0	0	0	1	6.62936
Protein SMG5 OS=Homo sapiens GN=SMG5 PE=1 SV=3	SMG5	Q9UPR3	5.91	113.855	1016	1.87008	1	1		1	0	0	0	0	0	1	6.62936
CCR4-NOT transcription complex subunit 11 OS=Homo sapiens GN=CNOT11 PE=1 SV=1	CNOT11	Q9UKZ1	6.4	55.18	510	4.70588	2	2	16000000	2	0	0	0	0	0	2	6.62936
WD repeat-containing protein 26 OS=Homo sapiens GN=WDR26 PE=1 SV=3	WDR26	Q9H7D7	6.16	72.079	661	2.87443	1	1	51000000	2	0	0	0	0	0	2	6.62936
Melanoma inhibitory activity protein 3 OS=Homo sapiens GN=MIA3 PE=1 SV=1	MIA3	Q5JRA6	4.84	213.57	1907	17.8815	22	22	130000000	27	0	0	0	0	0	27	6.62936
ATP-dependent RNA helicase DHX36 OS=Homo sapiens GN=DHX36 PE=1 SV=2	DHX36	Q9H2U1	7.68	114.688	1008	19.4444	13	12	34000000	17	0	0	0	0	0	17	6.62936
Transcription factor BTF3 homolog 4 OS=Homo sapiens GN=BTF3L4 PE=1 SV=1	BTF3L4	Q96K17	6.35	17.26	158	4.43038	1	1	7700000	1	0	0	0	0	0	1	6.62936
Fibrocystin OS=Homo sapiens GN=PKHD1 PE=1 SV=1	PKHD1	P08F94	6.57	446.418	4074	0.270005	1	1		1	0	0	0	0	0	1	6.62936
Small nuclear ribonucleoprotein E OS=Homo sapiens GN=SNRPE PE=1 SV=1	SNRPE	P62304	9.44	10.797	92	11.9565	1	1	43000000	1	0	0	0	0	0	1	6.62936
Isoform 5 of Serine/threonine-protein phosphatase 6 regulatory subunit 3 OS=Homo sapiens GN=PPP6R3	PPP6R3	Q5H9R7-5	4.64	98.423	879	0.796359	1	1	6000000	1	0	0	0	0	0	1	6.62936
Small nuclear ribonucleoprotein F OS=Homo sapiens GN=SNRPF PE=1 SV=1	SNRPF	P62306	4.67	9.719	86	15.1163	1	1		1	0	0	0	0	0	1	6.62936
Neuroblast differentiation-associated protein AHNAK OS=Homo sapiens GN=AHNAK PE=1 SV=2	AHNAK	Q09666	6.15	628.699	5890	42.3599	110	110	380000000	164	0	0	0	0	0	164	6.62936
TELO2-interacting protein 1 homolog OS=Homo sapiens GN=TTI1 PE=1 SV=3	TTI1	O43156	5.97	121.992	1089	1.37741	1	1	5000000	1	0	0	0	0	0	1	6.62936
Telomere length regulation protein TEL2 homolog OS=Homo sapiens GN=TELO2 PE=1 SV=2	TELO2	Q9Y4R8	5.76	91.689	837	1.31422	1	1	15000000	1	0	0	0	0	0	1	6.62936
Dihydropyrimidinase-related protein 4 OS=Homo sapiens GN=DPYSL4 PE=1 SV=2	DPYSL4	O14531	7.09	61.838	572	10.3147	4	4	24000000	4	0	0	0	0	0	4	6.62936
Asparagine synthetase [glutamine-hydrolyzing] OS=Homo sapiens GN=ASNS PE=1 SV=4	ASNS	P08243	6.86	64.329	561	3.74332	2	2	4400000	2	0	0	0	0	0	2	6.62936
Archain 1, isoform CRA_a OS=Homo sapiens GN=ARCN1 PE=1 SV=1	ARCN1	B0YIW6	5.85	61.587	552	3.80435	2	2	13000000	2	0	0	0	0	0	2	6.62936
Skin-specific protein 32 OS=Homo sapiens GN=XP32 PE=1 SV=1	XP32	Q5T750	7.97	26.219	250	4.4	1	1	10000000	1	0	0	0	0	0	1	6.62936
Isoform 4 of AP-3 complex subunit beta-2 OS=Homo sapiens GN=AP3B2	AP3B2	Q13367-4	5.43	121.113	1101	1.18074	1	1		1	0	0	0	0	0	1	6.62936
Succinyl-CoA ligase [ADP/GDP-forming] subunit alpha, mitochondrial OS=Homo sapiens GN=SUCLG1 PE=1 SV=4	SUCLG1	P53597	8.79	36.227	346	4.62428	1	1	7000000	1	0	0	0	0	0	1	6.62936
U6 snRNA-associated Sm-like protein LSm1 OS=Homo sapiens GN=LSM1 PE=1 SV=1	LSM1	O15116	5.22	15.17	133	12.0301	1	1		1	0	0	0	0	0	1	6.62936
Mediator of DNA damage checkpoint protein 1 OS=Homo sapiens GN=MDC1 PE=1 SV=3	MDC1	Q14676	5.47	226.529	2089	0.813787	1	1		1	0	0	0	0	0	1	6.62936
40S ribosomal protein S21 OS=Homo sapiens GN=RPS21 PE=1 SV=1	RPS21	Q9BYK1	7.83	9.888	90	27.7778	2	2	41000000	2	0	0	0	0	0	2	6.62936
Casein kinase II subunit alpha' OS=Homo sapiens GN=CSNK2A2 PE=1 SV=1	CSNK2A2	P19784	8.56	41.187	350	15.7143	4	4	31000000	5	0	0	0	0	0	5	6.62936
Secretory carrier-associated membrane protein 3 OS=Homo sapiens GN=SCAMP3 PE=1 SV=3	SCAMP3	O14828	7.64	38.262	347	2.01729	1	1	11000000	1	0	0	0	0	0	1	6.62936
L-aminoadipate-semialdehyde dehydrogenase-phosphopantetheinyl transferase OS=Homo sapiens GN=AASDHPPT PE=1 SV=2	AASDHPPT	Q9NRN7	6.8	35.753	309	4.85437	1	1	5000000	3	0	0	0	0	0	3	6.62936
Isoform 2 of Eukaryotic translation initiation factor 4E OS=Homo sapiens GN=EIF4E	EIF4E	P06730-2	6.42	28.76	248	12.0968	3	3	67000000	3	0	0	0	0	0	3	6.62936
PERQ amino acid-rich with GYF domain-containing protein 2 OS=Homo sapiens GN=GIGYF2 PE=1 SV=1	GIGYF2	Q6Y7W6	5.54	149.978	1299	29.8691	27	27	340000000	47	0	0	0	0	0	47	6.62936
UPF0600 protein C5orf51 OS=Homo sapiens GN=C5orf51 PE=1 SV=1	C5orf51	A6NDU8	5.26	33.599	294	9.86395	1	1	24000000	4	0	0	0	0	0	4	6.62936
Eukaryotic translation initiation factor 3 subunit H OS=Homo sapiens GN=EIF3S3 PE=1 SV=1	EIF3S3	B3KS98	7.33	41.555	366	27.5956	7	7	120000000	9	0	0	0	0	0	9	6.62936
Vesicle-associated membrane protein-associated protein B/C OS=Homo sapiens GN=VAPB PE=1 SV=3	VAPB	O95292	7.3	27.211	243	3.29218	1	1	9100000	1	0	0	0	0	0	1	6.62936
Coatomer subunit gamma-1 OS=Homo sapiens GN=COPG1 PE=1 SV=1	COPG1	Q9Y678	5.47	97.655	874	3.08924	2	1	18000000	2	0	0	0	0	0	2	6.62936
Eukaryotic translation elongation factor 1 epsilon-1 OS=Homo sapiens GN=EEF1E1 PE=1 SV=1	EEF1E1	O43324	8.54	19.798	174	14.3678	1	1	12000000	4	0	0	0	0	0	4	6.62936
Heat shock 70 kDa protein 12A OS=Homo sapiens GN=HSPA12A PE=1 SV=2	HSPA12A	O43301	6.77	74.931	675	6.22222	3	3	7700000	3	0	0	0	0	0	3	6.62936
Protein LSM14 homolog A OS=Homo sapiens GN=LSM14A PE=1 SV=3	LSM14A	Q8ND56	9.52	50.499	463	9.71922	3	3	26000000	3	0	0	0	0	0	3	6.62936
Eukaryotic translation initiation factor 4 gamma 2 (Fragment) OS=Homo sapiens GN=EIF4G2 PE=1 SV=1	EIF4G2	H0YCH5	9.19	49.621	444	21.8468	8	8	45000000	8	0	0	0	0	0	8	6.62936
Isoform 7 of Protein PRRC2C OS=Homo sapiens GN=PRRC2C	PRRC2C	Q9Y520-7	9.13	316.888	2898	19.5997	35	33	160000000	58	0	0	0	0	0	58	6.62936
Pre-B-cell leukemia transcription factor 1 OS=Homo sapiens GN=PBX1 PE=1 SV=1	PBX1	A0A087X0P4	9.1	28.841	259	11.1969	2	2		2	0	0	0	0	0	2	6.62936
Prefoldin subunit 2 OS=Homo sapiens GN=PFDN2 PE=1 SV=1	PFDN2	Q9UHV9	6.58	16.638	154	44.1558	6	6	410000000	9	0	0	0	0	0	9	6.62936
Single-stranded DNA-binding protein, mitochondrial OS=Homo sapiens GN=SSBP1 PE=1 SV=1	SSBP1	Q04837	9.6	17.249	148	5.40541	1	1		1	0	0	0	0	0	1	6.62936
RNA polymerase II-associated protein 3 OS=Homo sapiens GN=RPAP3 PE=1 SV=2	RPAP3	Q9H6T3	6.84	75.672	665	35.7895	18	18	280000000	29	0	0	0	0	0	29	6.62936
Prefoldin subunit 3 OS=Homo sapiens GN=VBP1 PE=1 SV=3	VBP1	P61758	7.11	22.643	197	42.132	6	6	90000000	8	0	0	0	0	0	8	6.62936
Pumilio homolog 1 OS=Homo sapiens GN=PUM1 PE=1 SV=1	PUM1	Q5T1Z4	6.84	126.678	1189	20.0168	17	11	120000000	27	0	0	0	0	0	27	6.62936
Mitotic-spindle organizing protein 2B OS=Homo sapiens GN=MZT2B PE=1 SV=1	MZT2B	Q6NZ67	10.15	16.216	158	22.1519	2	2	150000000	5	0	0	0	0	0	5	6.62936
Zinc finger protein 598 OS=Homo sapiens GN=ZNF598 PE=1 SV=1	ZNF598	Q86UK7	8.4	98.575	904	24.4469	16	16	160000000	18	0	0	0	0	0	18	6.62936
Isoform 2 of TBC1 domain family member 5 OS=Homo sapiens GN=TBC1D5	TBC1D5	Q92609-2	6.33	91.159	817	2.20318	1	1	6800000	1	0	0	0	0	0	1	6.62936
Insulin gene enhancer protein ISL-1 OS=Homo sapiens GN=ISL1 PE=1 SV=1	ISL1	P61371	8.28	39.01	349	9.45559	3	3	12000000	3	0	0	0	0	0	3	6.62936
CCR4-NOT transcription complex subunit 2 OS=Homo sapiens GN=CNOT2 PE=1 SV=1	CNOT2	Q9NZN8	7.66	59.7	540	2.03704	1	1	3000000	1	0	0	0	0	0	1	6.62936
RNA-binding motif, single-stranded-interacting protein 3 OS=Homo sapiens GN=RBMS3 PE=1 SV=1	RBMS3	Q6XE24	8.03	47.809	437	6.86499	2	2	26000000	2	0	0	0	0	0	2	6.62936
Vacuolar protein sorting 11 (Yeast), isoform CRA_a OS=Homo sapiens GN=VPS11 PE=1 SV=1	VPS11	A0A087WXL6	7.05	107.74	941	1.59405	1	1		1	0	0	0	0	0	1	6.62936
Isoform 3 of CLIP-associating protein 2 OS=Homo sapiens GN=CLASP2	CLASP2	O75122-3	8.37	165.821	1515	2.31023	2	2	5600000	2	0	0	0	0	0	2	6.62936
Ataxin-2 OS=Homo sapiens GN=ATXN2 PE=1 SV=2	ATXN2	Q99700	9.57	140.196	1313	17.5933	17	17	84000000	25	0	0	0	0	0	25	6.62936
Glucose-6-phosphate isomerase (Fragment) OS=Homo sapiens GN=GPI PE=1 SV=1	GPI	A0A0A0MTS2	9.04	64.784	573	2.6178	1	1	8100000	1	0	0	0	0	0	1	6.62936
Isoform 3 of ARF GTPase-activating protein GIT1 OS=Homo sapiens GN=GIT1	GIT1	Q9Y2X7-3	7.01	85.393	770	19.8701	10	10	180000000	11	0	0	0	0	0	11	6.62936
Mothers against decapentaplegic homolog 9 OS=Homo sapiens GN=SMAD9 PE=1 SV=1	SMAD9	O15198	7.77	52.46	467	2.35546	1	1	6800000	1	0	0	0	0	0	1	6.62936
Double-stranded RNA-binding protein Staufen homolog 2 OS=Homo sapiens GN=STAU2 PE=1 SV=1	STAU2	A0A0A0MTD1	9.66	51.977	473	28.5412	10	10	64000000	10	0	0	0	0	0	10	6.62936
E3 ubiquitin/ISG15 ligase TRIM25 OS=Homo sapiens GN=TRIM25 PE=1 SV=2	TRIM25	Q14258	8.09	70.928	630	11.746	5	5	26000000	5	0	0	0	0	0	5	6.62936
WD repeat-containing protein 7 OS=Homo sapiens GN=WDR7 PE=1 SV=2	WDR7	Q9Y4E6	6.92	163.705	1490	1.07383	1	1		1	0	0	0	0	0	1	6.62936
SRSF protein kinase 1 OS=Homo sapiens GN=SRPK1 PE=1 SV=2	SRPK1	Q5R363	7.71	92.306	826	1.57385	1	1	7800000	1	0	0	0	0	0	1	6.62936
Eukaryotic translation initiation factor 3 subunit L OS=Homo sapiens GN=EIF3L PE=1 SV=1	EIF3L	B0QY89	6.65	70.857	607	27.1829	14	14	150000000	23	0	0	0	0	0	23	6.62936
Serine/threonine-protein kinase mTOR OS=Homo sapiens GN=MTOR PE=1 SV=1	MTOR	B1AKP8	7.81	85.846	754	3.5809	1	1		1	0	0	0	0	0	1	6.62936
N6-adenosine-methyltransferase subunit METTL14 OS=Homo sapiens GN=METTL14 PE=1 SV=2	METTL14	Q9HCE5	6.21	52.118	456	5.70175	1	1		1	0	0	0	0	0	1	6.62936
LIM domain-binding protein 1 OS=Homo sapiens GN=LDB1 PE=1 SV=2	LDB1	Q86U70	6.96	46.502	411	2.43309	1	1	8200000	1	0	0	0	0	0	1	6.62936
Isoform 4 of Myotubularin-related protein 5 OS=Homo sapiens GN=SBF1	SBF1	O95248-4	7.11	210.916	1893	1.05652	1	1		1	0	0	0	0	0	1	6.62936
Band 4.1-like protein 5 OS=Homo sapiens GN=EPB41L5 PE=1 SV=3	EPB41L5	Q9HCM4	6.58	81.805	733	2.04638	1	1		1	0	0	0	0	0	1	6.62936
Isoform 6 of CCR4-NOT transcription complex subunit 10 OS=Homo sapiens GN=CNOT10	CNOT10	Q9H9A5-6	8.21	89.084	804	1.74129	1	1	6100000	1	0	0	0	0	0	1	6.62936
DnaJ homolog subfamily C member 11 OS=Homo sapiens GN=DNAJC11 PE=1 SV=2	DNAJC11	Q9NVH1	8.4	63.239	559	2.68336	1	1	3300000	1	0	0	0	0	0	1	6.62936
ELKS/Rab6-interacting/CAST family member 1 OS=Homo sapiens GN=ERC1 PE=1 SV=1	ERC1	X6RM00	6.49	111.906	976	1.63934	1	1	6200000	1	0	0	0	0	0	1	6.62936
UDP-N-acetylglucosamine--peptide N-acetylglucosaminyltransferase 110 kDa subunit OS=Homo sapiens GN=OGT PE=1 SV=3	OGT	O15294	6.7	116.85	1046	17.782	14	14	95000000	17	0	0	0	0	0	17	6.62936
G-protein-signaling modulator 1 OS=Homo sapiens GN=GPSM1 PE=1 SV=1	GPSM1	A0A0A0MSK4	6.54	74.436	675	6.81481	5	5	13000000	5	0	0	0	0	0	5	6.62936
OTU domain-containing protein 4 OS=Homo sapiens GN=OTUD4 PE=1 SV=4	OTUD4	Q01804	6.71	123.968	1114	1.43627	1	1	7400000	1	0	0	0	0	0	1	6.62936
Bifunctional epoxide hydrolase 2 OS=Homo sapiens GN=EPHX2 PE=1 SV=2	EPHX2	P34913	6.28	62.575	555	6.12613	1	1	27000000	1	0	0	0	0	0	1	6.62936
Protein LSM12 homolog OS=Homo sapiens GN=LSM12 PE=1 SV=1	LSM12	K7ELG9	7.42	24.94	230	16.9565	3	3	33000000	3	0	0	0	0	0	3	6.62936
Isoform 3 of AT-rich interactive domain-containing protein 1B OS=Homo sapiens GN=ARID1B	ARID1B	Q8NFD5-3	6.67	241.31	2289	1.87855	3	2	9900000	3	0	0	0	0	0	3	6.62936
Isoform 2 of Src substrate cortactin OS=Homo sapiens GN=CTTN	CTTN	Q14247-2	6.64	70.915	634	15.142	7	7	33000000	7	0	0	0	0	0	7	6.62936
ATPase ASNA1 OS=Homo sapiens GN=ASNA1 PE=1 SV=2	ASNA1	O43681	4.91	38.767	348	2.87356	1	1		1	0	0	0	0	0	1	6.62936
Protein S100-A11 OS=Homo sapiens GN=S100A11 PE=1 SV=2	S100A11	P31949	7.12	11.733	105	34.2857	3	3	21000000	3	0	0	0	0	0	3	6.62936
Isoform 6 of Serine/threonine-protein kinase MRCK alpha OS=Homo sapiens GN=CDC42BPA	CDC42BPA	Q5VT25-6	6.51	202.684	1781	41.7743	56	50	290000000	101	0	0	0	0	0	101	6.62936
Isoform 3 of Importin-5 OS=Homo sapiens GN=IPO5	IPO5	O00410-3	4.92	125.464	1115	4.30493	3	3	14000000	3	0	0	0	0	0	3	6.62936
Transportin-3 OS=Homo sapiens GN=TNPO3 PE=1 SV=1	TNPO3	C9J7E5	5.71	107.978	957	16.092	8	8	33000000	9	0	0	0	0	0	9	6.62936
Isoform 2 of Melanoma-associated antigen D1 OS=Homo sapiens GN=MAGED1	MAGED1	Q9Y5V3-2	5.82	91.901	834	8.27338	6	6	29000000	9	0	0	0	0	0	9	6.62936
SCY1-like protein 2 OS=Homo sapiens GN=SCYL2 PE=1 SV=1	SCYL2	Q6P3W7	8.22	103.642	929	1.93757	1	1		6	0	0	0	0	0	6	6.62936
Isoform 2 of TNF receptor-associated factor 2 OS=Homo sapiens GN=TRAF2	TRAF2	Q12933-2	7.21	61.343	553	2.53165	1	1	7600000	1	0	0	0	0	0	1	6.62936
WD repeat-containing protein 5 OS=Homo sapiens GN=WDR5 PE=1 SV=1	WDR5	P61964	8.27	36.565	334	2.39521	1	1	8500000	1	0	0	0	0	0	1	6.62936
Striatin OS=Homo sapiens GN=STRN PE=1 SV=4	STRN	O43815	5.27	86.079	780	8.58974	3	3	21000000	3	0	0	0	0	0	3	6.62936
Protein FAM167A OS=Homo sapiens GN=FAM167A PE=2 SV=1	FAM167A	Q96KS9	6.32	24.167	214	8.41121	2	2	47000000	2	0	0	0	0	0	2	6.62936
CREB-binding protein OS=Homo sapiens GN=CREBBP PE=1 SV=3	CREBBP	Q92793	8.53	265.182	2442	1.2285	3	1	22000000	3	0	0	0	0	0	3	6.62936
Protein IGKV3D-20 (Fragment) OS=Homo sapiens GN=IGKV3D-20 PE=4 SV=1	IGKV3D-20	A0A0C4DH25	4.59	12.507	116	7.75862	1	1	37000000	1	0	0	0	0	0	1	6.62936
Isoform 6 of Ankyrin repeat and KH domain-containing protein 1 OS=Homo sapiens GN=ANKHD1	ANKHD1	Q8IWZ3-6	5.86	277.004	2617	0.343905	1	1	12000000	1	0	0	0	0	0	1	6.62936
Transmembrane channel-like protein OS=Homo sapiens GN=TMC3 PE=3 SV=1	TMC3	H0YK69	9.19	125.734	1101	0.817439	1	1		1	0	0	0	0	0	1	6.62936
Fragile X mental retardation syndrome-related protein 2 OS=Homo sapiens GN=FXR2 PE=1 SV=2	FXR2	P51116	6.23	74.178	673	27.3403	13	11	410000000	22	0	0	0	0	0	22	6.62936
Vacuolar protein sorting-associated protein 33B OS=Homo sapiens GN=VPS33B PE=1 SV=2	VPS33B	Q9H267	6.71	70.54	617	5.34846	2	2	15000000	4	0	0	0	0	0	4	6.62936
Protein transport protein Sec24A OS=Homo sapiens GN=SEC24A PE=1 SV=2	SEC24A	O95486	7.66	119.674	1093	7.4108	6	5	80000000	10	0	0	0	0	0	10	6.62936
Microtubule-associated protein RP/EB family member 1 OS=Homo sapiens GN=MAPRE1 PE=1 SV=3	MAPRE1	Q15691	5.14	29.98	268	2.98507	1	1	43000000	1	0	0	0	0	0	1	6.62936
Isoform 2 of Nck-associated protein 1 OS=Homo sapiens GN=NCKAP1	NCKAP1	Q9Y2A7-2	6.68	129.433	1134	7.84832	6	6	16000000	6	0	0	0	0	0	6	6.62936
Helicase SKI2W OS=Homo sapiens GN=SKIV2L PE=1 SV=3	SKIV2L	Q15477	6.06	137.668	1246	1.36437	1	1	18000000	2	0	0	0	0	0	2	6.62936
Zinc finger C2HC domain-containing protein 1A OS=Homo sapiens GN=ZC2HC1A PE=1 SV=2	ZC2HC1A	Q96GY0	9.82	35.07	325	2.76923	1	1	13000000	1	0	0	0	0	0	1	6.62936
Isoform 2 of Zinc finger SWIM domain-containing protein 8 OS=Homo sapiens GN=ZSWIM8	ZSWIM8	A7E2V4-2	6.58	201.395	1892	1.21564	1	1	27000000	2	0	0	0	0	0	2	6.62936
SNF-related serine/threonine-protein kinase OS=Homo sapiens GN=SNRK PE=1 SV=2	SNRK	Q9NRH2	7.06	84.223	765	1.43791	1	1	150000000	1	0	0	0	0	0	1	6.62936
UPF0561 protein C2orf68 OS=Homo sapiens GN=C2orf68 PE=2 SV=1	C2orf68	Q2NKX9	8.31	18.739	166	7.22892	1	1		1	0	0	0	0	0	1	6.62936
Abl interactor 2 OS=Homo sapiens GN=ABI2 PE=1 SV=2	ABI2	F8WAL6	6.02	55.648	513	6.04288	2	2	13000000	5	0	0	0	0	0	5	6.62936
Isoform 3 of Eukaryotic peptide chain release factor GTP-binding subunit ERF3A OS=Homo sapiens GN=GSPT1	GSPT1	P15170-3	5.33	68.656	637	8.32025	4	4	57000000	4	0	0	0	0	0	4	6.62936
Importin subunit alpha-3 OS=Homo sapiens GN=KPNA4 PE=1 SV=1	KPNA4	O00629	4.96	57.851	521	14.9712	3	3	29000000	4	0	0	0	0	0	4	6.62936
Palladin OS=Homo sapiens GN=PALLD PE=1 SV=3	PALLD	Q8WX93	7.09	150.47	1383	1.73536	2	2		2	0	0	0	0	0	2	6.62936
H/ACA ribonucleoprotein complex subunit 1 OS=Homo sapiens GN=GAR1 PE=1 SV=1	GAR1	Q9NY12	10.92	22.334	217	8.29493	1	1	200000000	1	0	0	0	0	0	1	6.62936
ATP-binding cassette sub-family E member 1 OS=Homo sapiens GN=ABCE1 PE=1 SV=1	ABCE1	P61221	8.34	67.271	599	2.67112	1	1	5500000	1	0	0	0	0	0	1	6.62936
Isoform E of Nuclear factor of activated T-cells 5 OS=Homo sapiens GN=NFAT5	NFAT5	O94916-5	5.3	167.703	1549	24.3383	25	1	380000000	69	0	0	0	0	0	69	6.62936
Serine/threonine-protein kinase TBK1 OS=Homo sapiens GN=TBK1 PE=1 SV=1	TBK1	Q9UHD2	6.79	83.589	729	8.77915	4	4	20000000	4	0	0	0	0	0	4	6.62936
Replication factor C subunit 3 OS=Homo sapiens GN=RFC3 PE=1 SV=2	RFC3	P40938	8.34	40.53	356	7.86517	2	2	11000000	2	0	0	0	0	0	2	6.62936
Cytochrome c oxidase subunit 4 isoform 1, mitochondrial OS=Homo sapiens GN=COX4I1 PE=1 SV=1	COX4I1	P13073	9.51	19.564	169	5.91716	1	1	96000000	1	0	0	0	0	0	1	6.62936
Uncharacterized protein C15orf52 OS=Homo sapiens GN=C15orf52 PE=1 SV=1	C15orf52	Q6ZUT6	9.13	57.29	534	5.99251	3	3	12000000	3	0	0	0	0	0	3	6.62936
RING finger protein unkempt homolog OS=Homo sapiens GN=UNK PE=1 SV=2	UNK	Q9C0B0	6.86	88.029	810	3.58025	1	1	7000000	1	0	0	0	0	0	1	6.62936
Enhancer of mRNA-decapping protein 3 OS=Homo sapiens GN=EDC3 PE=1 SV=1	EDC3	Q96F86	7.11	56.042	508	12.4016	5	5	26000000	5	0	0	0	0	0	5	6.62936
Isoform 2 of LIM and SH3 domain protein 1 OS=Homo sapiens GN=LASP1	LASP1	Q14847-2	8.62	35.991	323	6.50155	2	2	7900000	2	0	0	0	0	0	2	6.62936
Eukaryotic translation initiation factor 3 subunit E OS=Homo sapiens GN=EIF3E PE=1 SV=1	EIF3E	E5RIP5	6.24	5.397	45	44.4444	2	2	60000000	7	0	0	0	0	0	7	6.62936
Vesicle-trafficking protein SEC22b OS=Homo sapiens GN=SEC22B PE=1 SV=4	SEC22B	O75396	6.92	24.578	215	4.18605	1	1	14000000	1	0	0	0	0	0	1	6.62936
Disabled homolog 2 OS=Homo sapiens GN=DAB2 PE=1 SV=3	DAB2	P98082	5.53	82.397	770	2.72727	1	1		1	0	0	0	0	0	1	6.62936
Guanine nucleotide-binding protein-like 1 OS=Homo sapiens GN=GNL1 PE=1 SV=2	GNL1	P36915	5.8	68.619	607	1.4827	1	1		1	0	0	0	0	0	1	6.62936
Tropomodulin-1 OS=Homo sapiens GN=TMOD1 PE=1 SV=1	TMOD1	P28289	5.1	40.544	359	3.06407	1	1	16000000	1	0	0	0	0	0	1	6.62936
Splicing factor 45 OS=Homo sapiens GN=RBM17 PE=1 SV=1	RBM17	Q96I25	5.97	44.934	401	2.99252	1	1	12000000	1	0	0	0	0	0	1	6.62936
Signal recognition particle 54 kDa protein OS=Homo sapiens GN=SRP54 PE=1 SV=1	SRP54	G3V4F7	9.04	48.638	440	2.72727	1	1	5200000	1	0	0	0	0	0	1	6.62936
Isoform 3 of Serine/threonine-protein kinase DCLK2 OS=Homo sapiens GN=DCLK2	DCLK2	Q8N568-3	8.53	85.33	783	3.83142	2	1	7200000	2	0	0	0	0	0	2	6.62936
Unconventional prefoldin RPB5 interactor 1 OS=Homo sapiens GN=URI1 PE=1 SV=3	URI1	O94763	5.05	59.796	535	29.5327	14	14	220000000	17	0	0	0	0	0	17	6.62936
Coronin-1B OS=Homo sapiens GN=CORO1B PE=1 SV=1	CORO1B	Q9BR76	5.88	54.2	489	1.63599	1	1		1	0	0	0	0	0	1	6.62936
Zinc finger CCHC domain-containing protein 3 OS=Homo sapiens GN=ZCCHC3 PE=1 SV=1	ZCCHC3	Q9NUD5	8.53	43.591	404	2.9703	1	1		1	0	0	0	0	0	1	6.62936
cAMP-specific 3',5'-cyclic phosphodiesterase 4C OS=Homo sapiens GN=PDE4C PE=1 SV=2	PDE4C	Q08493	5.2	79.852	712	0.983146	1	1	130000000	1	0	0	0	0	0	1	6.62936
WASH complex subunit strumpellin OS=Homo sapiens GN=KIAA0196 PE=1 SV=1	KIAA0196	Q12768	6.98	134.201	1159	0.949094	1	1		1	0	0	0	0	0	1	6.62936
Isoform 2 of Transcription elongation factor SPT6 OS=Homo sapiens GN=SUPT6H	SUPT6H	Q7KZ85-2	8.46	61.262	545	4.77064	1	1	41000000	4	0	0	0	0	0	4	6.62936
Plastin-1 OS=Homo sapiens GN=PLS1 PE=1 SV=2	PLS1	Q14651	5.41	70.209	629	2.7027	1	1		1	0	0	0	0	0	1	6.62936
Transcriptional activator protein Pur-beta OS=Homo sapiens GN=PURB PE=1 SV=3	PURB	Q96QR8	5.43	33.22	312	7.69231	2	2	80000000	2	0	0	0	0	0	2	6.62936
Coiled-coil domain-containing protein 9 OS=Homo sapiens GN=CCDC9 PE=1 SV=1	CCDC9	Q9Y3X0	5.4	59.667	531	22.2222	11	11	93000000	14	0	0	0	0	0	14	6.62936
Serine/threonine-protein kinase MRCK beta OS=Homo sapiens GN=CDC42BPB PE=1 SV=2	CDC42BPB	Q9Y5S2	6.37	194.193	1711	3.68206	7	1	120000000	7	0	0	0	0	0	7	6.62936
Isoform 2 of Uncharacterized protein C11orf57 OS=Homo sapiens GN=C11orf57	C11orf57	Q6ZUT1-2	9.73	34.176	293	2.38908	1	1	210000	1	0	0	0	0	0	1	6.62936
Protein IGKV3D-15 (Fragment) OS=Homo sapiens GN=IGKV3D-15 PE=1 SV=2	IGKV3D-15	A0A087WSY6	5.19	12.526	115	7.82609	1	1	70000000	1	0	0	0	0	0	1	6.62936
Nucleoside diphosphate kinase 7 OS=Homo sapiens GN=NME7 PE=1 SV=1	NME7	E9PNU1	8.09	28.87	256	3.90625	1	1	21000000	1	0	0	0	0	0	1	6.62936
RNA polymerase II-associated factor 1 homolog OS=Homo sapiens GN=PAF1 PE=1 SV=2	PAF1	Q8N7H5	4.63	59.939	531	2.63653	1	1	5400000	1	0	0	0	0	0	1	6.62936
Synaptopodin OS=Homo sapiens GN=SYNPO PE=1 SV=2	SYNPO	Q8N3V7	8.72	99.402	929	1.82992	1	1	9200000	1	0	0	0	0	0	1	6.62936
La-related protein 1 OS=Homo sapiens GN=LARP1 PE=1 SV=2	LARP1	Q6PKG0	8.82	123.434	1096	2.91971	2	2	7800000	2	0	0	0	0	0	2	6.62936
Lamin-B receptor OS=Homo sapiens GN=LBR PE=1 SV=2	LBR	Q14739	9.36	70.658	615	2.43902	1	1	10000000	1	0	0	0	0	0	1	6.62936
PDZ and LIM domain protein 5 OS=Homo sapiens GN=PDLIM5 PE=1 SV=5	PDLIM5	Q96HC4	8.21	63.904	596	5.36913	2	2	18000000	2	0	0	0	0	0	2	6.62936
Dynein light chain Tctex-type 1 OS=Homo sapiens GN=DYNLT1 PE=1 SV=1	DYNLT1	Q5VTU3	5.34	10.194	92	17.3913	1	1		1	0	0	0	0	0	1	6.62936
Genetic suppressor element 1 OS=Homo sapiens GN=GSE1 PE=1 SV=3	GSE1	Q14687	7.74	136.081	1217	1.31471	1	1		1	0	0	0	0	0	1	6.62936
Dihydropyrimidinase-related protein 5 OS=Homo sapiens GN=DPYSL5 PE=1 SV=1	DPYSL5	Q9BPU6	7.2	61.382	564	9.39716	3	3	52000000	4	0	0	0	0	0	4	6.62936
Fragile X mental retardation syndrome-related protein 1 OS=Homo sapiens GN=FXR1 PE=1 SV=3	FXR1	P51114	6.15	69.678	621	43.1562	17	16	660000000	30	0	0	0	0	0	30	6.62936
Gamma-tubulin complex component 6 OS=Homo sapiens GN=TUBGCP6 PE=1 SV=3	TUBGCP6	Q96RT7	6.32	200.372	1819	4.50797	5	5	39000000	5	0	0	0	0	0	5	6.62936
PIH1 domain-containing protein 1 OS=Homo sapiens GN=PIH1D1 PE=1 SV=1	PIH1D1	Q9NWS0	5.14	32.342	290	36.2069	6	6	160000000	15	0	0	0	0	0	15	6.62936
Isoform 2 of Epidermal growth factor receptor substrate 15-like 1 OS=Homo sapiens GN=EPS15L1	EPS15L1	Q9UBC2-2	5.08	99.545	910	1.0989	1	1		1	0	0	0	0	0	1	6.62936
Calpain small subunit 1 OS=Homo sapiens GN=CAPNS1 PE=4 SV=1	CAPNS1	A0A0C4DGQ5	6.23	33.765	322	3.10559	1	1	5600000	1	0	0	0	0	0	1	6.62936
Dynactin subunit 1 OS=Homo sapiens GN=DCTN1 PE=1 SV=3	DCTN1	Q14203	5.81	141.607	1278	6.80751	6	6	16000000	7	0	0	0	0	0	7	6.62936
Isoform 7 of Fragile X mental retardation protein 1 OS=Homo sapiens GN=FMR1	FMR1	Q06787-7	7.23	69.137	615	16.2602	6	1	370000000	11	0	0	0	0	0	11	6.62936
Very-long-chain enoyl-CoA reductase OS=Homo sapiens GN=TECR PE=1 SV=1	TECR	M0R3C3	9.2	11.766	105	9.52381	1	1		1	0	0	0	0	0	1	6.62936
Small glutamine-rich tetratricopeptide repeat-containing protein alpha OS=Homo sapiens GN=SGTA PE=1 SV=1	SGTA	O43765	4.87	34.042	313	6.38978	2	2	880000000	2	0	0	0	0	0	2	6.62936
Calponin-3 OS=Homo sapiens GN=CNN3 PE=1 SV=1	CNN3	Q15417	6.05	36.391	329	14.8936	4	4	70000000	4	0	0	0	0	0	4	6.62936
Splicing factor, arginine/serine-rich 15 OS=Homo sapiens GN=SCAF4 PE=1 SV=3	SCAF4	O95104	9.55	125.79	1147	2.26678	1	1	9300000	1	0	0	0	0	0	1	6.62936
DnaJ homolog subfamily A member 2 OS=Homo sapiens GN=DNAJA2 PE=1 SV=1	DNAJA2	O60884	6.48	45.717	412	8.00971	3	3	36000000	3	0	0	0	0	0	3	6.62936
Exportin-2 OS=Homo sapiens GN=CSE1L PE=1 SV=3	CSE1L	P55060	5.77	110.346	971	2.57467	2	2	19000000	3	0	0	0	0	0	3	6.62936
Vacuolar protein sorting-associated protein 51 homolog OS=Homo sapiens GN=VPS51 PE=1 SV=2	VPS51	Q9UID3	6.47	85.988	782	4.4757	2	2	10000000	2	0	0	0	0	0	2	6.62936
Isoform 2 of Tubulin-specific chaperone E OS=Homo sapiens GN=TBCE	TBCE	Q15813-2	7.27	64.811	578	2.94118	1	1	3800000	1	0	0	0	0	0	1	6.62936
Isoform 2 of BTB/POZ domain-containing protein 10 OS=Homo sapiens GN=BTBD10	BTBD10	Q9BSF8-2	7.14	54.372	483	28.3644	12	12	110000000	20	0	0	0	0	0	20	6.62936
4-aminobutyrate aminotransferase, mitochondrial OS=Homo sapiens GN=ABAT PE=1 SV=1	ABAT	H3BRN4	8.09	58.103	515	1.5534	1	1	18000000	1	0	0	0	0	0	1	6.62936
Isoform 2 of Bifunctional UDP-N-acetylglucosamine 2-epimerase/N-acetylmannosamine kinase OS=Homo sapiens GN=GNE	GNE	Q9Y223-2	6.93	83.013	753	3.58566	1	1		1	0	0	0	0	0	1	6.62936
Vacuolar protein sorting-associated protein 16 homolog OS=Homo sapiens GN=VPS16 PE=1 SV=2	VPS16	Q9H269	6.77	94.634	839	3.69487	3	3	18000000	3	0	0	0	0	0	3	6.62936
N-terminal kinase-like protein OS=Homo sapiens GN=SCYL1 PE=1 SV=1	SCYL1	E9PK59	6.55	86.129	780	3.20513	1	1		1	0	0	0	0	0	1	6.62936
Clathrin light chain B OS=Homo sapiens GN=CLTB PE=1 SV=1	CLTB	P09497	4.64	25.175	229	10.0437	2	2	690000000	2	0	0	0	0	0	2	6.62936
Transcription factor Sp3 OS=Homo sapiens GN=SP3 PE=1 SV=3	SP3	Q02447	5.26	81.876	781	2.04866	1	1		1	0	0	0	0	0	1	6.62936
Calcium homeostasis endoplasmic reticulum protein OS=Homo sapiens GN=CHERP PE=1 SV=3	CHERP	Q8IWX8	9.04	103.637	916	3.05677	2	2	23000000	3	0	0	0	0	0	3	6.62936
Isoform 2 of Trinucleotide repeat-containing gene 6C protein OS=Homo sapiens GN=TNRC6C	TNRC6C	Q9HCJ0-2	6.84	179.211	1726	3.88181	3	3	5500000	7	0	0	0	0	0	7	6.62936
ATP synthase subunit d, mitochondrial OS=Homo sapiens GN=ATP5H PE=1 SV=3	ATP5H	O75947	5.3	18.479	161	10.559	1	1	10000000	1	0	0	0	0	0	1	6.62936
RNA polymerase-associated protein CTR9 homolog OS=Homo sapiens GN=CTR9 PE=1 SV=1	CTR9	Q6PD62	6.77	133.42	1173	0.682012	1	1	12000000	1	0	0	0	0	0	1	6.62936
Aminopeptidase B OS=Homo sapiens GN=RNPEP PE=1 SV=2	RNPEP	Q9H4A4	5.74	72.549	650	2.76923	1	1		1	0	0	0	0	0	1	6.62936
Isoform 4 of Acetyl-CoA carboxylase 1 OS=Homo sapiens GN=ACACA	ACACA	Q13085-4	6.52	269.827	2383	1.93034	3	3	26000000	3	0	0	0	0	0	3	6.62936
Gem-associated protein 4 OS=Homo sapiens GN=GEMIN4 PE=1 SV=2	GEMIN4	P57678	6.04	119.96	1058	1.0397	1	1	11000000	1	0	0	0	0	0	1	6.62936
26S proteasome non-ATPase regulatory subunit 12 OS=Homo sapiens GN=PSMD12 PE=1 SV=3	PSMD12	O00232	7.65	52.871	456	2.19298	1	1	59000000	1	0	0	0	0	0	1	6.62936
Isoform 3 of Protein NEDD1 OS=Homo sapiens GN=NEDD1	NEDD1	Q8NHV4-3	7.97	72.665	667	35.3823	16	16	140000000	27	0	0	0	0	0	27	6.62936
Cullin-3 OS=Homo sapiens GN=CUL3 PE=1 SV=2	CUL3	Q13618	8.48	88.873	768	3.25521	2	2	7400000	2	0	0	0	0	0	2	6.62936
Trafficking protein particle complex subunit 3 OS=Homo sapiens GN=TRAPPC3 PE=1 SV=1	TRAPPC3	A0A087WWM0	5.06	21.218	188	7.97872	1	1	4500000	1	0	0	0	0	0	1	6.62936
HZGJ OS=Homo sapiens GN=HZGJ PE=1 SV=1	HZGJ	Q86YQ0	8.12	84.667	765	19.2157	10	10	130000000	18	0	0	0	0	0	18	6.62936
Signal recognition particle subunit SRP68 OS=Homo sapiens GN=SRP68 PE=1 SV=2	SRP68	Q9UHB9	8.56	70.686	627	1.43541	1	1		1	0	0	0	0	0	1	6.62936
Fragile X mental retardation protein 1 OS=Homo sapiens GN=FMR1 PE=1 SV=1	FMR1	Q06787	7.42	71.131	632	15.981	7	2	370000000	12	0	0	0	0	0	12	6.62936
Isoform F of Constitutive coactivator of PPAR-gamma-like protein 1 OS=Homo sapiens GN=FAM120A	FAM120A	Q9NZB2-6	9	125.192	1146	24.9564	17	16	70000000	21	0	0	0	0	0	21	6.62936
Hsc70-interacting protein OS=Homo sapiens GN=ST13 PE=1 SV=2	ST13	P50502	5.27	41.305	369	10.0271	3	3	12000000	3	0	0	0	0	0	3	6.62936
Cleavage stimulation factor subunit 2 tau variant OS=Homo sapiens GN=CSTF2T PE=1 SV=1	CSTF2T	Q9H0L4	7.25	64.396	616	7.95455	3	1	20000000	4	0	0	0	0	0	4	6.62936
Polyadenylate-binding protein-interacting protein 1 OS=Homo sapiens GN=PAIP1 PE=1 SV=1	PAIP1	D6R9H8	5.47	29.159	266	7.14286	1	1	36000000	3	0	0	0	0	0	3	6.62936
Glutamine--tRNA ligase OS=Homo sapiens GN=QARS PE=1 SV=1	QARS	F2Z2V6	9.57	10.737	100	16	1	1	23000000	1	0	0	0	0	0	1	6.62936
Chromosome 11 open reading frame 48, isoform CRA_c OS=Homo sapiens GN=C11orf98 PE=1 SV=1	C11orf98	A0A0B4J220	11.53	14.225	123	10.5691	1	1	7800000	1	0	0	0	0	0	1	6.62936
Signal recognition particle subunit SRP72 OS=Homo sapiens GN=SRP72 PE=1 SV=3	SRP72	O76094	9.26	74.56	671	1.63934	1	1		1	0	0	0	0	0	1	6.62936
S-phase kinase-associated protein 1 OS=Homo sapiens GN=SKP1 PE=1 SV=1	SKP1	E5RJR5	4.7	18.708	163	8.58896	1	1	29000000	2	0	0	0	0	0	2	6.62936
Isoform 3 of Drebrin-like protein OS=Homo sapiens GN=DBNL	DBNL	Q9UJU6-3	5.05	49.012	439	3.64465	1	1		1	0	0	0	0	0	1	6.62936
V-type proton ATPase subunit H OS=Homo sapiens GN=ATP6V1H PE=1 SV=1	ATP6V1H	Q9UI12	6.48	55.847	483	4.7619	1	1	12000000	1	0	0	0	0	0	1	6.62936
Translocon-associated protein subunit delta OS=Homo sapiens GN=SSR4 PE=1 SV=1	SSR4	P51571	6.15	18.987	173	6.35838	1	1	25000000	1	0	0	0	0	0	1	6.62936
Cytoplasmic dynein 1 intermediate chain 2 OS=Homo sapiens GN=DYNC1I2 PE=1 SV=3	DYNC1I2	Q13409	5.2	71.412	638	2.19436	1	1	17000000	1	0	0	0	0	0	1	6.62936
Gamma-tubulin complex component 5 OS=Homo sapiens GN=TUBGCP5 PE=1 SV=1	TUBGCP5	A0A087X1Z1	6.01	118.516	1026	1.26706	1	1	7600000	1	0	0	0	0	0	1	6.62936
Galectin-3-binding protein OS=Homo sapiens GN=LGALS3BP PE=1 SV=1	LGALS3BP	Q08380	5.27	65.289	585	1.88034	1	1	20000000	1	0	0	0	0	0	1	6.62936
DNA-directed RNA polymerase II subunit RPB3 OS=Homo sapiens GN=POLR2C PE=1 SV=2	POLR2C	P19387	4.92	31.422	275	13.4545	2	2	21000000	2	0	0	0	0	0	2	6.62936
Vacuolar protein sorting-associated protein 33A OS=Homo sapiens GN=VPS33A PE=1 SV=1	VPS33A	Q96AX1	6.96	67.568	596	1.84564	1	1	3400000	1	0	0	0	0	0	1	6.62936
Putative pre-mRNA-splicing factor ATP-dependent RNA helicase DHX16 OS=Homo sapiens GN=DHX16 PE=1 SV=2	DHX16	O60231	6.8	119.189	1041	2.01729	2	1	29000000	2	0	0	0	0	0	2	6.62936
Partner of Y14 and mago OS=Homo sapiens GN=WIBG PE=1 SV=1	WIBG	Q9BRP8	9.45	22.642	204	8.82353	1	1	12000000	1	0	0	0	0	0	1	6.62936
YTH domain-containing family protein 2 OS=Homo sapiens GN=YTHDF2 PE=1 SV=2	YTHDF2	Q9Y5A9	8.79	62.296	579	20.8981	9	7	170000000	10	0	0	0	0	0	10	6.62936
Gem-associated protein 5 OS=Homo sapiens GN=GEMIN5 PE=1 SV=3	GEMIN5	Q8TEQ6	6.62	168.483	1508	0.994695	1	1	18000000	1	0	0	0	0	0	1	6.62936
Sjoegren syndrome/scleroderma autoantigen 1 OS=Homo sapiens GN=SSSCA1 PE=1 SV=1	SSSCA1	E9PK41	9.69	9.31	81	9.87654	1	1	11000000	1	0	0	0	0	0	1	6.62936
Isoform 4 of Serine/threonine-protein phosphatase 2B catalytic subunit beta isoform OS=Homo sapiens GN=PPP3CB	PPP3CB	P16298-4	5.91	59.086	525	1.71429	1	1	11000000	1	0	0	0	0	0	1	6.62936
Multivesicular body subunit 12A OS=Homo sapiens GN=MVB12A PE=1 SV=1	MVB12A	E9PJW8	8.53	20.752	199	9.04523	1	1	29000000	1	0	0	0	0	0	1	6.62936
cAMP-specific 3',5'-cyclic phosphodiesterase 4B OS=Homo sapiens GN=PDE4B PE=1 SV=1	PDE4B	Q07343	5.25	83.291	736	1.63043	1	1	2400000	1	0	0	0	0	0	1	6.62936
E3 ubiquitin-protein ligase BRE1A OS=Homo sapiens GN=RNF20 PE=1 SV=2	RNF20	Q5VTR2	5.94	113.592	975	1.12821	1	1		1	0	0	0	0	0	1	6.62936
Isoform 2 of Transgelin-2 OS=Homo sapiens GN=TAGLN2	TAGLN2	P37802-2	8.25	24.438	220	15	3	3	33000000	4	0	0	0	0	0	4	6.62936
Isoform 3 of Gamma-tubulin complex component 2 OS=Homo sapiens GN=TUBGCP2	TUBGCP2	Q9BSJ2-4	7.08	105.561	930	33.9785	24	24	270000000	33	0	0	0	0	0	33	6.62936
Peroxiredoxin-6 OS=Homo sapiens GN=PRDX6 PE=1 SV=3	PRDX6	P30041	6.38	25.019	224	25.4464	4	4	42000000	5	0	0	0	0	0	5	6.62936
Prefoldin subunit 1 OS=Homo sapiens GN=PFDN1 PE=1 SV=2	PFDN1	O60925	6.81	14.202	122	17.2131	2	2	110000000	3	0	0	0	0	0	3	6.62936
GTP-binding protein SAR1a OS=Homo sapiens GN=SAR1A PE=1 SV=1	SAR1A	Q5SQT8	7.03	13.653	121	16.5289	1	1	21000000	1	0	0	0	0	0	1	6.62936
Probable gluconokinase OS=Homo sapiens GN=IDNK PE=1 SV=1	IDNK	Q5T6J8	7.88	9.766	90	8.88889	1	1		1	0	0	0	0	0	1	6.62936
Isoform 3 of Pumilio homolog 2 OS=Homo sapiens GN=PUM2	PUM2	Q8TB72-3	7.08	113.933	1064	11.1842	10	4	140000000	18	0	0	0	0	0	18	6.62936
TRPM8 channel-associated factor 1 OS=Homo sapiens GN=TCAF1 PE=1 SV=3	TCAF1	Q9Y4C2	6.54	102.061	921	1.08578	1	1	8200000	1	0	0	0	0	0	1	6.62936
Isoform 2 of Cohesin subunit SA-2 OS=Homo sapiens GN=STAG2	STAG2	Q8N3U4-2	5.52	145.658	1268	0.709779	1	1		1	0	0	0	0	0	1	6.62936
ATP-binding cassette sub-family A member 7 OS=Homo sapiens GN=ABCA7 PE=1 SV=3	ABCA7	Q8IZY2	7.24	234.201	2146	1.21156	1	1	26000000	1	0	0	0	0	0	1	6.62936
Protein UXT OS=Homo sapiens GN=UXT PE=4 SV=1	UXT	A0A0C4DFR8	7.12	19.584	169	20.7101	3	3	45000000	4	0	0	0	0	0	4	6.62936
Ribosomal biogenesis protein LAS1L OS=Homo sapiens GN=LAS1L PE=1 SV=2	LAS1L	Q9Y4W2	4.73	83.013	734	2.7248	1	1		1	0	0	0	0	0	1	6.62936
Isoform 2 of Trafficking protein particle complex subunit 9 OS=Homo sapiens GN=TRAPPC9	TRAPPC9	Q96Q05-2	7.21	139.349	1246	0.802568	1	1	10000000	1	0	0	0	0	0	1	6.62936
Isoform 1 of BRCA1-A complex subunit BRE OS=Homo sapiens GN=BRE	BRE	Q9NXR7-1	6.14	46.944	415	5.78313	2	2	16000000	3	0	0	0	0	0	3	6.62936
Chromobox protein homolog 8 OS=Homo sapiens GN=CBX8 PE=1 SV=3	CBX8	Q9HC52	9.91	43.369	389	4.88432	1	1	8300000	1	0	0	0	0	0	1	6.62936
Isoform 2 of Vacuolar protein sorting-associated protein 28 homolog OS=Homo sapiens GN=VPS28	VPS28	Q9UK41-2	7.72	26.445	233	10.7296	1	1	15000000	2	0	0	0	0	0	2	6.62936
Ras GTPase-activating protein-binding protein 1 OS=Homo sapiens GN=G3BP1 PE=1 SV=1	G3BP1	E5RH00	9.82	4.332	37	40.5405	1	1	160000000	1	0	0	0	0	0	1	6.62936
Unconventional myosin-XVIIIa OS=Homo sapiens GN=MYO18A PE=1 SV=3	MYO18A	Q92614	6.3	232.971	2054	1.41188	1	1		1	0	0	0	0	0	1	6.62936
Protein enabled homolog OS=Homo sapiens GN=ENAH PE=1 SV=2	ENAH	Q8N8S7	6.93	66.47	591	4.90694	2	2	18000000	2	0	0	0	0	0	2	6.62936
Small nuclear ribonucleoprotein Sm D1 OS=Homo sapiens GN=SNRPD1 PE=1 SV=1	SNRPD1	J3QLI9	11.84	8.388	75	44	2	2	33000000	2	0	0	0	0	0	2	6.62936
Isoform 6 of A-kinase anchor protein 9 OS=Homo sapiens GN=AKAP9	AKAP9	Q99996-6	4.98	455.142	3929	0.356325	1	1		3	0	0	0	0	0	3	6.62936
WD repeat-containing protein 3 OS=Homo sapiens GN=WDR3 PE=1 SV=1	WDR3	Q9UNX4	6.64	106.032	943	0.954401	1	1	10000000	1	0	0	0	0	0	1	6.62936
DNA-directed RNA polymerase II subunit RPB9 OS=Homo sapiens GN=POLR2I PE=1 SV=1	POLR2I	K7EKS1	4.56	10.239	88	26.1364	1	1		1	0	0	0	0	0	1	6.62936
Negative elongation factor A OS=Homo sapiens GN=NELFA PE=4 SV=1	NELFA	A0A0C4DFX9	9.26	58.462	539	2.5974	1	1		1	0	0	0	0	0	1	6.62936
Glutamine synthetase OS=Homo sapiens GN=GLUL PE=1 SV=4	GLUL	P15104	6.89	42.037	373	46.6488	13	13	450000000	30	0	0	0	0	0	30	6.62936
CUGBP Elav-like family member 2 OS=Homo sapiens GN=CELF2 PE=1 SV=1	CELF2	O95319	8.76	54.25	508	1.9685	1	1	7200000	1	0	0	0	0	0	1	6.62936
mRNA-decapping enzyme 1A OS=Homo sapiens GN=DCP1A PE=1 SV=2	DCP1A	Q9NPI6	6.25	63.27	582	18.7285	7	7	44000000	9	0	0	0	0	0	9	6.62936
Isoform 2 of DNA repair protein RAD50 OS=Homo sapiens GN=RAD50	RAD50	Q92878-2	6.89	154.491	1318	0.60698	1	1	18000000	1	0	0	0	0	0	1	6.62936
Conserved oligomeric Golgi complex subunit 2 OS=Homo sapiens GN=COG2 PE=1 SV=1	COG2	B7Z2Y2	7.11	76.032	679	2.65096	2	2	4500000	2	0	0	0	0	0	2	6.62936
BRISC complex subunit Abro1 OS=Homo sapiens GN=FAM175B PE=1 SV=2	FAM175B	Q15018	6.21	46.872	415	2.6506	1	1		1	0	0	0	0	0	1	6.62936
Transcription elongation factor B polypeptide 1 OS=Homo sapiens GN=TCEB1 PE=1 SV=1	TCEB1	R4GMY8	5.81	6.963	65	21.5385	1	1	14000000	1	0	0	0	0	0	1	6.62936
mRNA-decapping enzyme 1B OS=Homo sapiens GN=DCP1B PE=1 SV=2	DCP1B	Q8IZD4	8.56	67.681	617	3.72771	1	1	9600000	2	0	0	0	0	0	2	6.62936
DnaJ homolog subfamily B member 1 OS=Homo sapiens GN=DNAJB1 PE=1 SV=4	DNAJB1	P25685	8.63	38.02	340	3.52941	1	1	13000000	1	0	0	0	0	0	1	6.62936
Adenosylhomocysteinase OS=Homo sapiens GN=AHCY PE=1 SV=4	AHCY	P23526	6.34	47.685	432	12.7315	5	5	54000000	6	0	0	0	0	0	6	6.62936
COP9 signalosome complex subunit 6 OS=Homo sapiens GN=COPS6 PE=1 SV=1	COPS6	Q7L5N1	5.73	36.14	327	4.89297	1	1	4500000	1	0	0	0	0	0	1	6.62936
Telomerase-binding protein EST1A OS=Homo sapiens GN=SMG6 PE=1 SV=2	SMG6	Q86US8	7.05	160.362	1419	2.60747	3	3	30000000	3	0	0	0	0	0	3	6.62936
Isoform 4 of Kinesin-like protein KIF1B OS=Homo sapiens GN=KIF1B	KIF1B	O60333-4	5.52	205.012	1823	0.71311	1	1		1	0	0	0	0	0	1	6.62936
Protein argonaute-2 OS=Homo sapiens GN=AGO2 PE=1 SV=3	AGO2	Q9UKV8	9.19	97.146	859	14.319	9	5	53000000	11	0	0	0	0	0	11	6.62936
cAMP-dependent protein kinase type II-alpha regulatory subunit OS=Homo sapiens GN=PRKAR2A PE=1 SV=2	PRKAR2A	P13861	5.07	45.49	404	6.68317	2	1	29000000	2	0	0	0	0	0	2	6.62936
Isoform 2 of Putative ATP-dependent RNA helicase DHX30 OS=Homo sapiens GN=DHX30	DHX30	Q7L2E3-2	8.6	136.03	1222	15.7938	16	16	140000000	16	0	0	0	0	0	16	6.62936
Putative RNA-binding protein 15B OS=Homo sapiens GN=RBM15B PE=1 SV=3	RBM15B	Q8NDT2	9.85	97.147	890	2.80899	2	2	10000000	2	0	0	0	0	0	2	6.62936
Isoform 3 of Fermitin family homolog 2 OS=Homo sapiens GN=FERMT2	FERMT2	Q96AC1-3	6.7	78.625	687	2.76565	1	1		1	0	0	0	0	0	1	6.62936
Isoform 2 of Eukaryotic translation initiation factor 3 subunit B OS=Homo sapiens GN=EIF3B	EIF3B	P55884-2	5.08	98.967	873	20.9622	11	11	130000000	18	0	0	0	0	0	18	6.62936
E3 ubiquitin-protein ligase CHIP OS=Homo sapiens GN=STUB1 PE=1 SV=2	STUB1	Q9UNE7	5.87	34.834	303	4.9505	1	1		1	0	0	0	0	0	1	6.62936
Isoform 2 of Creatine kinase U-type, mitochondrial OS=Homo sapiens GN=CKMT1A	CKMT1A	P12532-2	8.62	50.389	448	3.57143	1	1	11000000	1	0	0	0	0	0	1	6.62936
Cyclin-dependent kinase 11B OS=Homo sapiens GN=CDK11B PE=1 SV=2	CDK11B	J3QKR5	5.36	90.953	780	1.02564	1	1	27000000	1	0	0	0	0	0	1	6.62936
Protein S100-A8 OS=Homo sapiens GN=S100A8 PE=1 SV=1	S100A8	P05109	7.03	10.828	93	11.828	1	1	35000000	1	0	0	0	0	0	1	6.62936
Ataxin-2-like protein OS=Homo sapiens GN=ATXN2L PE=1 SV=2	ATXN2L	Q8WWM7	8.59	113.304	1075	22.1395	17	17	110000000	23	0	0	0	0	0	23	6.62936
Spermatogenesis-associated serine-rich protein 2 OS=Homo sapiens GN=SPATS2 PE=1 SV=1	SPATS2	Q86XZ4	8.9	59.508	545	2.75229	1	1		1	0	0	0	0	0	1	6.62936
Protein VAC14 homolog OS=Homo sapiens GN=VAC14 PE=1 SV=1	VAC14	Q08AM6	6.13	87.917	782	8.18414	4	4	13000000	7	0	0	0	0	0	7	6.62936
Zinc finger protein 845 OS=Homo sapiens GN=ZNF845 PE=2 SV=3	ZNF845	Q96IR2	9.33	113.06	970	1.54639	1	0		1	0	0	0	0	0	1	6.62936
Isoform 6 of SHC-transforming protein 1 OS=Homo sapiens GN=SHC1	SHC1	P29353-6	6.44	62.854	584	11.8151	4	4	26000000	7	0	0	0	0	0	7	6.62936
Probable E3 ubiquitin-protein ligase HERC1 OS=Homo sapiens GN=HERC1 PE=1 SV=2	HERC1	Q15751	6.04	531.891	4861	0.32915	1	1	96000000	1	0	0	0	0	0	1	6.62936
Protein NipSnap homolog 1 OS=Homo sapiens GN=NIPSNAP1 PE=1 SV=1	NIPSNAP1	Q9BPW8	9.31	33.289	284	5.98592	1	1	11000000	1	0	0	0	0	0	1	6.62936
Isoform 5 of MMS19 nucleotide excision repair protein homolog OS=Homo sapiens GN=MMS19	MMS19	Q96T76-8	6.52	115.631	1051	7.04091	5	5	22000000	5	0	0	0	0	0	5	6.62936
Putative ATP-dependent RNA helicase DHX57 OS=Homo sapiens GN=DHX57 PE=1 SV=2	DHX57	Q6P158	7.71	155.507	1386	3.3189	3	2	18000000	3	0	0	0	0	0	3	6.62936
Probable helicase with zinc finger domain OS=Homo sapiens GN=HELZ PE=1 SV=1	HELZ	J3QS41	7.42	218.92	1943	2.47041	4	4	1000000000	4	0	0	0	0	0	4	6.62936
Spermatogenesis-associated protein 16 OS=Homo sapiens GN=SPATA16 PE=1 SV=3	SPATA16	Q9BXB7	9.14	65.222	569	1.05448	1	1	13000000	1	0	0	0	0	0	1	6.62936
Transmembrane emp24 domain-containing protein 4 OS=Homo sapiens GN=TMED4 PE=1 SV=1	TMED4	Q7Z7H5	8.28	25.926	227	4.84581	1	1	61000000	2	0	0	0	0	0	2	6.62936
WASH complex subunit 7 OS=Homo sapiens GN=KIAA1033 PE=1 SV=1	KIAA1033	F8VYH7	4.82	21.614	189	5.29101	1	1		1	0	0	0	0	0	1	6.62936
E3 ubiquitin-protein ligase TRIM56 OS=Homo sapiens GN=TRIM56 PE=1 SV=3	TRIM56	Q9BRZ2	7.74	81.437	755	5.43046	2	2	8100000	2	0	0	0	0	0	2	6.62936
Ig lambda chain V-I region BL2 OS=Homo sapiens PE=2 SV=1	NOGENE	P06316	7.77	13.556	130	6.15385	1	1	360000000	2	0	0	0	0	0	2	6.62936
Gamma-tubulin complex component 3 OS=Homo sapiens GN=TUBGCP3 PE=1 SV=2	TUBGCP3	Q96CW5	8.12	103.506	907	38.258	23	23	250000000	50	0	0	0	0	0	50	6.62936
Isoform 2 of Protein transport protein Sec24D OS=Homo sapiens GN=SEC24D	SEC24D	O94855-2	7.25	113.007	1033	10.455	6	5	64000000	6	0	0	0	0	0	6	6.62936
Isoform 9 of Eukaryotic translation initiation factor 4 gamma 1 OS=Homo sapiens GN=EIF4G1	EIF4G1	Q04637-9	5.34	176.128	1606	19.3649	22	18	150000000	32	0	0	0	0	0	32	6.62936
Isoform 3 of Tudor domain-containing protein 3 OS=Homo sapiens GN=TDRD3	TDRD3	Q9H7E2-3	9	83.052	744	14.1129	8	8	38000000	8	0	0	0	0	0	8	6.62936
Thioredoxin domain-containing protein 5 OS=Homo sapiens GN=TXNDC5 PE=1 SV=2	TXNDC5	Q8NBS9	5.97	47.599	432	4.62963	1	1	32000000	1	0	0	0	0	0	1	6.62936
UDP-glucose:glycoprotein glucosyltransferase 2 OS=Homo sapiens GN=UGGT2 PE=1 SV=4	glycoprotein	Q9NYU1	6.89	174.624	1516	0.461741	1	1	470000000	1	0	0	0	0	0	1	6.62936
CREB-regulated transcription coactivator 3 OS=Homo sapiens GN=CRTC3 PE=1 SV=2	CRTC3	Q6UUV7	6.84	66.918	619	4.20032	1	1		3	0	0	0	0	0	3	6.62936
Protein CASC3 OS=Homo sapiens GN=CASC3 PE=1 SV=2	CASC3	O15234	6.48	76.232	703	29.7297	17	17	220000000	26	0	0	0	0	0	26	6.62936
Glycogen debranching enzyme OS=Homo sapiens GN=AGL PE=1 SV=3	AGL	P35573	6.76	174.652	1532	16.3838	18	18	98000000	24	0	0	0	0	0	24	6.62936
Coatomer subunit gamma-2 OS=Homo sapiens GN=COPG2 PE=1 SV=1	COPG2	Q9UBF2	5.81	97.56	871	5.3961	3	2	10000000	3	0	0	0	0	0	3	6.62936
Eukaryotic translation initiation factor 2 subunit 2 OS=Homo sapiens GN=EIF2S2 PE=1 SV=2	EIF2S2	P20042	5.8	38.364	333	12.012	4	4	30000000	5	0	0	0	0	0	5	6.62936
Prefoldin subunit 5 OS=Homo sapiens GN=PFDN5 PE=1 SV=2	PFDN5	Q99471	6.33	17.317	154	37.6623	4	4	34000000	4	0	0	0	0	0	4	6.62936
BRISC and BRCA1-A complex member 1 OS=Homo sapiens GN=BABAM1 PE=1 SV=1	BABAM1	Q9NWV8	4.64	36.537	329	6.99088	1	1		1	0	0	0	0	0	1	6.62936
Isoform 2 of Protein SMG8 OS=Homo sapiens GN=SMG8	SMG8	Q8ND04-2	7.68	113.259	1023	7.62463	6	6	34000000	8	0	0	0	0	0	8	6.62936
Kinesin-like protein KIF3C OS=Homo sapiens GN=KIF3C PE=1 SV=3	KIF3C	O14782	8.22	89.371	793	4.16141	1	1		1	0	0	0	0	0	1	6.62936
Probable ATP-dependent RNA helicase DDX6 OS=Homo sapiens GN=DDX6 PE=1 SV=2	DDX6	P26196	8.66	54.382	483	46.1698	14	14	82000000	18	0	0	0	0	0	18	6.62936
General vesicular transport factor p115 OS=Homo sapiens GN=USO1 PE=1 SV=2	USO1	O60763	4.91	107.828	962	47.817	36	36	530000000	108	0	0	0	0	0	108	6.62936
Testin OS=Homo sapiens GN=TES PE=1 SV=1	TES	Q9UGI8	7.68	47.964	421	22.3278	7	7	52000000	7	0	0	0	0	0	7	6.62936
Low-density lipoprotein receptor-related protein 1B OS=Homo sapiens GN=LRP1B PE=1 SV=2	LRP1B	Q9NZR2	5.3	515.159	4599	0.56534	1	1	29000000	1	0	0	0	0	0	1	6.62936
Isoform 2 of N-acetyl-D-glucosamine kinase OS=Homo sapiens GN=NAGK	NAGK	Q9UJ70-2	6.68	42.011	390	3.33333	1	1		1	0	0	0	0	0	1	6.62936
Transcriptional repressor CTCF OS=Homo sapiens GN=CTCF PE=1 SV=1	CTCF	P49711	6.96	82.732	727	2.20083	1	1		1	0	0	0	0	0	1	6.62936
Sorting nexin-9 OS=Homo sapiens GN=SNX9 PE=1 SV=1	SNX9	Q9Y5X1	5.58	66.55	595	5.71429	2	2	11000000	3	0	0	0	0	0	3	6.62936
Isoform 2 of Cell differentiation protein RCD1 homolog OS=Homo sapiens GN=RQCD1	RQCD1	Q92600-2	7.03	36.813	331	16.0121	3	3	38000000	6	0	0	0	0	0	6	6.62936
Oxysterol-binding protein-related protein 8 OS=Homo sapiens GN=OSBPL8 PE=1 SV=3	OSBPL8	Q9BZF1	6.96	101.132	889	1.23735	1	1		1	0	0	0	0	0	1	6.62936
Protein CDV3 homolog OS=Homo sapiens GN=CDV3 PE=1 SV=1	CDV3	Q9UKY7	6.4	27.318	258	6.58915	1	1	5600000	1	0	0	0	0	0	1	6.62936
Protein PRRC2A OS=Homo sapiens GN=PRRC2A PE=1 SV=3	PRRC2A	P48634	9.45	228.724	2157	18.4979	24	22	120000000	33	0	0	0	0	0	33	6.62936
Isoform 2 of Cystathionine beta-synthase OS=Homo sapiens GN=CBS	CBS	P35520-2	6.44	61.824	565	4.60177	1	1	23000000	2	0	0	0	0	0	2	6.62936
Isoform 6 of Dynamin-1-like protein OS=Homo sapiens GN=DNM1L	DNM1L	O00429-6	7.08	83.347	749	4.00534	2	2	8000000	2	0	0	0	0	0	2	6.62936
U2 small nuclear ribonucleoprotein auxiliary factor 35 kDa subunit-related protein 2 OS=Homo sapiens GN=ZRSR2 PE=1 SV=2	ZRSR2	Q15696	9.72	58.009	482	2.6971	1	1	10000000	1	0	0	0	0	0	1	6.62936
PDZ and LIM domain protein 4 OS=Homo sapiens GN=PDLIM4 PE=1 SV=2	PDLIM4	P50479	7.91	35.376	330	2.72727	1	1	1400000000	1	0	0	0	0	0	1	6.62936
Transcription factor HIVEP2 OS=Homo sapiens GN=HIVEP2 PE=1 SV=2	HIVEP2	P31629	6.96	268.885	2446	5.27392	9	9	35000000	12	0	0	0	0	0	12	6.62936
LEM domain-containing protein 2 OS=Homo sapiens GN=LEMD2 PE=1 SV=1	LEMD2	Q8NC56	9	56.94	503	3.37972	1	1		1	0	0	0	0	0	1	6.62936
Isoform 3 of Protein transport protein Sec24B OS=Homo sapiens GN=SEC24B	SEC24B	O95487-3	6.57	140.333	1298	24.4992	22	21	110000000	40	0	0	0	0	0	40	6.62936
La-related protein 4B OS=Homo sapiens GN=LARP4B PE=1 SV=3	LARP4B	Q92615	6.92	80.503	738	6.63957	4	4	36000000	4	0	0	0	0	0	4	6.62936
Rho guanine nucleotide exchange factor 2 OS=Homo sapiens GN=ARHGEF2 PE=1 SV=1	ARHGEF2	V9GYM8	7.37	115.999	1031	31.9108	24	24	89000000	33	0	0	0	0	0	33	6.62936
BTB/POZ domain-containing protein KCTD20 OS=Homo sapiens GN=KCTD20 PE=1 SV=1	KCTD20	Q7Z5Y7	5.33	47.45	419	55.1313	15	15	200000000	33	0	0	0	0	0	33	6.62936
U6 snRNA-associated Sm-like protein LSm8 OS=Homo sapiens GN=LSM8 PE=1 SV=3	LSM8	O95777	4.48	10.396	96	16.6667	1	1	10000000	1	0	0	0	0	0	1	6.62936
Protein transport protein Sec61 subunit beta OS=Homo sapiens GN=SEC61B PE=1 SV=2	SEC61B	P60468	11.56	9.968	96	11.4583	1	1		1	0	0	0	0	0	1	6.62936
Ubiquilin-4 OS=Homo sapiens GN=UBQLN4 PE=1 SV=2	UBQLN4	Q9NRR5	5.22	63.812	601	2.82862	1	1	32000000	1	0	0	0	0	0	1	6.62936
Roquin-1 OS=Homo sapiens GN=RC3H1 PE=1 SV=1	RC3H1	Q5TC82	7.27	125.658	1133	14.3866	10	10	41000000	14	0	0	0	0	0	14	6.62936
Cytosolic 5'-nucleotidase 3A OS=Homo sapiens GN=NT5C3A PE=1 SV=3	NT5C3A	Q9H0P0	7.12	37.924	336	2.97619	1	1		1	0	0	0	0	0	1	6.62936
Peptidyl-prolyl cis-trans isomerase FKBP4 OS=Homo sapiens GN=FKBP4 PE=1 SV=3	FKBP4	Q02790	5.43	51.772	459	8.061	3	3	42000000	4	0	0	0	0	0	4	6.62936
Constitutive coactivator of PPAR-gamma-like protein 2 OS=Homo sapiens GN=FAM120C PE=2 SV=3	FAM120C	Q9NX05	9.03	120.511	1096	5.56569	5	4	42000000	6	0	0	0	0	0	6	6.62936
CCR4-NOT transcription complex subunit 7 OS=Homo sapiens GN=CNOT7 PE=1 SV=3	CNOT7	Q9UIV1	4.84	32.724	285	15.7895	3	3	20000000	4	0	0	0	0	0	4	6.62936
39S ribosomal protein L15, mitochondrial OS=Homo sapiens GN=MRPL15 PE=1 SV=1	MRPL15	Q9P015	10.01	33.399	296	4.39189	1	1	5300000	1	0	0	0	0	0	1	6.62936
General transcription factor 3C polypeptide 4 OS=Homo sapiens GN=GTF3C4 PE=1 SV=2	GTF3C4	Q9UKN8	6.65	91.923	822	1.45985	1	1		1	0	0	0	0	0	1	6.62936
SKI family transcriptional corepressor 2 OS=Homo sapiens GN=SKOR2 PE=4 SV=1	SKOR2	A0A087X0E6	6.61	105.743	1015	2.26601	1	1		1	0	0	0	0	0	1	6.62936
Histone acetyltransferase p300 OS=Homo sapiens GN=EP300 PE=1 SV=2	EP300	Q09472	8.5	263.99	2414	1.657	3	1	22000000	6	0	0	0	0	0	6	6.62936
Serine/threonine-protein kinase 24 OS=Homo sapiens GN=STK24 PE=1 SV=1	STK24	B4DR80	5.58	45.807	412	1.69903	1	1		1	0	0	0	0	0	1	6.62936
Putative adenosylhomocysteinase 3 OS=Homo sapiens GN=AHCYL2 PE=1 SV=1	AHCYL2	Q96HN2	7.36	66.678	611	1.96399	1	1	51000000	2	0	0	0	0	0	2	6.62936
FERM, RhoGEF and pleckstrin domain-containing protein 1 OS=Homo sapiens GN=FARP1 PE=1 SV=2	FARP1	C9JME2	8.48	122.019	1076	3.15985	1	1	3500000	1	0	0	0	0	0	1	6.62936
Protein phosphatase 1B OS=Homo sapiens GN=PPM1B PE=1 SV=1	PPM1B	O75688	5.05	52.609	479	2.50522	1	1		1	0	0	0	0	0	1	6.62936
Dual specificity tyrosine-phosphorylation-regulated kinase 1A OS=Homo sapiens GN=DYRK1A PE=1 SV=2	DYRK1A	Q13627	8.75	85.53	763	1.7038	1	1		1	0	0	0	0	0	1	6.62936
Sequestosome-1 OS=Homo sapiens GN=SQSTM1 PE=1 SV=1	SQSTM1	Q13501	5.22	47.657	440	9.09091	2	2	38000000	3	0	0	0	0	0	3	6.62936
Acyl-protein thioesterase 2 OS=Homo sapiens GN=LYPLA2 PE=1 SV=1	LYPLA2	O95372	7.23	24.721	231	19.0476	2	2		2	0	0	0	0	0	2	6.62936
Aminoacyl tRNA synthase complex-interacting multifunctional protein 2 OS=Homo sapiens GN=AIMP2 PE=1 SV=2	AIMP2	A8MU58	8.07	26.743	242	15.7025	3	3	17000000	4	0	0	0	0	0	4	6.62936
DDB1- and CUL4-associated factor 7 OS=Homo sapiens GN=DCAF7 PE=1 SV=1	DCAF7	P61962	5.52	38.901	342	9.35673	3	3	26000000	3	0	0	0	0	0	3	6.62936
U6 snRNA-associated Sm-like protein LSm4 (Fragment) OS=Homo sapiens GN=LSM4 PE=1 SV=1	LSM4	V9GZ56	10.15	25.717	238	6.72269	1	1		1	0	0	0	0	0	1	6.62936
Coatomer subunit zeta-1 OS=Homo sapiens GN=COPZ1 PE=1 SV=1	COPZ1	F8VYZ4	4.64	18.504	163	9.20245	1	1		1	0	0	0	0	0	1	6.62936
Single-stranded DNA-binding protein 3 OS=Homo sapiens GN=SSBP3 PE=1 SV=1	SSBP3	A0A087WVT6	6.14	37.748	361	2.77008	1	1	12000000	1	0	0	0	0	0	1	6.62936
Symplekin OS=Homo sapiens GN=SYMPK PE=1 SV=2	SYMPK	Q92797	6.13	141.059	1274	2.59027	1	1		1	0	0	0	0	0	1	6.62936
Isoform 4 of Protein SMG7 OS=Homo sapiens GN=SMG7	SMG7	Q92540-4	8.81	131.568	1178	2.63158	3	3	13000000	3	0	0	0	0	0	3	6.62936
Isoform D of Nuclear factor of activated T-cells 5 OS=Homo sapiens GN=NFAT5	NFAT5	O94916-4	5.3	167.632	1548	24.2894	25	1	380000000	68	0	0	0	0	0	68	6.62936
Importin subunit alpha-4 OS=Homo sapiens GN=KPNA3 PE=1 SV=2	KPNA3	O00505	4.94	57.775	521	4.79846	1	1	13000000	3	0	0	0	0	0	3	6.62936
Mitotic spindle-associated MMXD complex subunit MIP18 OS=Homo sapiens GN=FAM96B PE=1 SV=1	FAM96B	Q9Y3D0	5.19	17.652	163	12.8834	1	1	23000000	2	0	0	0	0	0	2	6.62936
Loricrin OS=Homo sapiens GN=LOR PE=1 SV=2	LOR	P23490	8.09	25.744	312	4.16667	2	2		2	0	0	0	0	0	2	6.62936
Tropomodulin-3 OS=Homo sapiens GN=TMOD3 PE=1 SV=1	TMOD3	Q9NYL9	5.19	39.57	352	2.55682	1	1	7200000	1	0	0	0	0	0	1	6.62936
Protein SMG9 OS=Homo sapiens GN=SMG9 PE=1 SV=1	SMG9	Q9H0W8	7.01	57.614	520	4.42308	1	1	15000000	2	0	0	0	0	0	2	6.62936
Regulator of nonsense transcripts 1 OS=Homo sapiens GN=UPF1 PE=1 SV=2	UPF1	Q92900	6.61	124.267	1129	38.7954	34	34	420000000	56	0	0	0	0	0	56	6.62936
Ras GTPase-activating protein-binding protein 2 OS=Homo sapiens GN=G3BP2 PE=1 SV=2	G3BP2	Q9UN86	5.55	54.088	482	26.1411	9	9	180000000	24	0	0	0	0	0	24	6.62936
5'-3' exoribonuclease 1 OS=Homo sapiens GN=XRN1 PE=1 SV=1	XRN1	Q8IZH2	7.21	193.985	1706	5.04103	7	7	27000000	9	0	0	0	0	0	9	6.62936
Histone-arginine methyltransferase CARM1 OS=Homo sapiens GN=CARM1 PE=1 SV=3	CARM1	Q86X55	6.73	65.811	608	3.45395	2	2	37000000	2	0	0	0	0	0	2	6.62936
Mitochondrial import receptor subunit TOM70 OS=Homo sapiens GN=TOMM70A PE=1 SV=1	TOMM70A	O94826	7.12	67.412	608	1.48026	1	1	32000000	1	0	0	0	0	0	1	6.62936
Cytoplasmic FMR1-interacting protein 1 OS=Homo sapiens GN=CYFIP1 PE=1 SV=1	CYFIP1	Q7L576	6.9	145.089	1253	6.22506	7	7	39000000	8	0	0	0	0	0	8	6.62936
Protein argonaute-3 OS=Homo sapiens GN=AGO3 PE=1 SV=2	AGO3	Q9H9G7	9.11	97.298	860	13.8372	8	4	53000000	9	0	0	0	0	0	9	6.62936
Gamma-enolase OS=Homo sapiens GN=ENO2 PE=1 SV=3	ENO2	P09104	5.03	47.239	434	2.30415	1	1		1	0	0	0	0	0	1	6.62936
Protein Smaug homolog 2 OS=Homo sapiens GN=SAMD4B PE=1 SV=1	SAMD4B	A0A087WUK6	7.18	72.413	663	2.26244	1	1	14000000	1	0	0	0	0	0	1	6.62936
Proliferation-associated protein 2G4 OS=Homo sapiens GN=PA2G4 PE=1 SV=3	PA2G4	Q9UQ80	6.55	43.759	394	2.03046	1	1	9100000	1	0	0	0	0	0	1	6.62936
Mast/stem cell growth factor receptor Kit OS=Homo sapiens GN=KIT PE=1 SV=1	KIT	P10721	6.98	109.794	976	1.02459	1	1	170000000	1	0	0	0	0	0	1	6.62936
U3 small nucleolar RNA-associated protein 15 homolog (Fragment) OS=Homo sapiens GN=UTP15 PE=1 SV=1	UTP15	H0Y8P4	9.04	61.392	545	2.01835	1	1		1	0	0	0	0	0	1	6.62936
CTP synthase 1 OS=Homo sapiens GN=CTPS1 PE=1 SV=2	CTPS1	P17812	6.46	66.648	591	3.04569	1	1		1	0	0	0	0	0	1	6.62936
Eukaryotic translation initiation factor 4 gamma 3 OS=Homo sapiens GN=EIF4G3 PE=1 SV=1	EIF4G3	A0A0A0MSA7	5.48	180.385	1621	4.81184	7	3	66000000	8	0	0	0	0	0	8	6.62936
Protein FAM195A OS=Homo sapiens GN=FAM195A PE=1 SV=2	FAM195A	Q9BUT9	9.41	17.817	160	19.375	1	1	5100000	1	0	0	0	0	0	1	6.62936
cAMP-dependent protein kinase type II-beta regulatory subunit OS=Homo sapiens GN=PRKAR2B PE=1 SV=3	PRKAR2B	P31323	4.92	46.273	418	6.2201	2	1	27000000	2	0	0	0	0	0	2	6.62936
Isoform 2 of UBX domain-containing protein 1 OS=Homo sapiens GN=UBXN1	UBXN1	Q04323-2	5.35	35.086	312	3.84615	1	1	37000000	1	0	0	0	0	0	1	6.62936
T-cell receptor gamma chain C region 1 OS=Homo sapiens GN=TRGC1 PE=4 SV=1	TRGC1	A0A087WZX1	8.38	38.276	339	5.30973	1	1	220000000	1	0	0	0	0	0	1	6.62936
Transcription factor E4F1 OS=Homo sapiens GN=E4F1 PE=1 SV=2	E4F1	Q66K89	6.34	83.444	784	2.67857	1	1		1	0	0	0	0	0	1	6.62936
Isoform 5 of Rho guanine nucleotide exchange factor 7 OS=Homo sapiens GN=ARHGEF7	ARHGEF7	Q14155-5	6.84	82.519	731	18.3311	9	9	53000000	15	0	0	0	0	0	15	6.62936
Centriolar coiled-coil protein of 110 kDa OS=Homo sapiens GN=CCP110 PE=1 SV=3	CCP110	O43303	8.65	113.353	1012	7.50988	5	5	29000000	5	0	0	0	0	0	5	6.62936
Cytoplasmic polyadenylation element-binding protein 4 OS=Homo sapiens GN=CPEB4 PE=1 SV=1	CPEB4	E5RFP2	5.99	38.026	339	5.89971	1	1	22000000	1	0	0	0	0	0	1	6.62936
Protein transport protein Sec23B OS=Homo sapiens GN=SEC23B PE=1 SV=2	SEC23B	Q15437	6.89	86.424	767	53.9765	28	24	550000000	71	1.56454	1	1	11000000	1	72	6.14975
Protein transport protein Sec24C OS=Homo sapiens GN=SEC24C PE=1 SV=3	SEC24C	P53992	7.06	118.249	1094	30.5302	23	22	410000000	51	0.914077	1	1		1	52	5.67243
Protein transport protein Sec23A OS=Homo sapiens GN=SEC23A PE=1 SV=2	SEC23A	Q15436	7.08	86.105	765	49.0196	25	21	570000000	49	1.56863	1	1	11000000	1	50	5.61471
Enhancer of mRNA-decapping protein 4 OS=Homo sapiens GN=EDC4 PE=1 SV=1	EDC4	Q6P2E9	5.86	151.567	1401	25.6246	24	24	280000000	44	1.2848	1	1		1	45	5.45943
Isoform 3 of Protein SEC13 homolog OS=Homo sapiens GN=SEC13	SEC13	P55735-3	5.85	40.721	368	50.2717	16	16	1300000000	75	8.69565	2	2	12000000	2	77	5.22882
Probable ubiquitin carboxyl-terminal hydrolase FAF-X OS=Homo sapiens GN=USP9X PE=1 SV=3	USP9X	Q93008	5.8	292.094	2570	14.4358	27	27	110000000	36	0.428016	1	1	13000000	1	37	5.16993
Isoform 5 of Ubiquitin-associated protein 2-like OS=Homo sapiens GN=UBAP2L	UBAP2L	Q14157-5	7.02	116.569	1104	30.2536	21	21	260000000	35	0.815217	1	1	16000000	1	36	5.12928
CAD protein OS=Homo sapiens GN=CAD PE=1 SV=3	CAD	P27708	6.46	242.829	2225	16.9438	25	25	140000000	30	0.988764	1	1	6800000	1	31	4.90689
Eukaryotic translation initiation factor 3 subunit D OS=Homo sapiens GN=EIF3D PE=1 SV=1	EIF3D	O15371	6.05	63.932	548	26.6423	12	12	170000000	23	3.46715	1	1	4600000	1	24	4.52356
Insulin-like growth factor 2 mRNA-binding protein 3 OS=Homo sapiens GN=IGF2BP3 PE=1 SV=2	IGF2BP3	O00425	8.87	63.666	579	51.468	24	24	1000000000	45	4.66321	2	2	34000000	2	47	4.49185
Caprin-1 OS=Homo sapiens GN=CAPRIN1 PE=1 SV=2	CAPRIN1	Q14444	5.25	78.318	709	24.9647	11	11	250000000	22	1.55148	1	1	27000000	1	23	4.45943
Bifunctional glutamate/proline--tRNA ligase OS=Homo sapiens GN=EPRS PE=1 SV=5	EPRS	P07814	7.33	170.483	1512	9.72222	10	10	32000000	17	1.12434	1	1		1	18	4.08746
Eukaryotic translation initiation factor 3 subunit I OS=Homo sapiens GN=EIF3I PE=1 SV=1	EIF3I	Q13347	5.64	36.479	325	38.7692	8	8	97000000	15	3.69231	1	1		1	16	3.90689
Eukaryotic translation initiation factor 3 subunit M OS=Homo sapiens GN=EIF3M PE=1 SV=1	EIF3M	Q7L2H7	5.63	42.476	374	29.6791	9	9	75000000	15	4.81283	1	1	7700000	1	16	3.90689
Isoform 2 of Serine-threonine kinase receptor-associated protein OS=Homo sapiens GN=STRAP	STRAP	Q9Y3F4-2	5.31	39.753	363	29.7521	8	8	95000000	13	4.6832	1	1	15000000	1	14	3.70044
Tubulin gamma-1 chain OS=Homo sapiens GN=TUBG1 PE=1 SV=2	TUBG1	P23258	6.14	51.138	451	70.9534	20	20	430000000	52	14.4124	3	3	8700000	4	56	3.70044
Importin subunit alpha-7 OS=Homo sapiens GN=KPNA6 PE=1 SV=1	KPNA6	O60684	4.98	59.991	536	17.3507	7	7	71000000	12	2.61194	1	1	29000000	1	13	3.58496
Septin-6 OS=Homo sapiens GN=SEPT6 PE=1 SV=4	SEPT6	Q14141	6.67	49.685	434	13.1336	4	3	89000000	12	2.07373	1	1	69000000	1	13	3.58496
Y-box-binding protein 2 OS=Homo sapiens GN=YBX2 PE=1 SV=2	YBX2	Q9Y2T7	10.8	38.495	364	24.1758	7	3	390000000	11	2.1978	1	1	28000000	1	12	3.45943
EMILIN-1 OS=Homo sapiens GN=EMILIN1 PE=4 SV=1	EMILIN1	A0A0C4DFX3	5.17	106.629	1016	19.7835	14	14	180000000	21	3.44488	2	2	4700000	2	23	3.39232
Kinectin OS=Homo sapiens GN=KTN1 PE=1 SV=1	KTN1	Q86UP2	5.64	156.179	1357	8.32719	8	8	20000000	10	1.17907	1	1	6300000	1	11	3.32193
Eukaryotic translation initiation factor 3 subunit C OS=Homo sapiens GN=EIF3C PE=1 SV=1	EIF3C	Q99613	5.68	105.278	913	27.9299	26	26	190000000	30	2.95728	3	3	12000000	3	33	3.32193
C-1-tetrahydrofolate synthase, cytoplasmic OS=Homo sapiens GN=MTHFD1 PE=1 SV=1	MTHFD1	F5H2F4	8.43	110.544	1020	8.82353	6	6	16000000	10	1.07843	1	1	9700000	1	11	3.32193
Eukaryotic translation initiation factor 3 subunit C-like protein OS=Homo sapiens GN=EIF3CL PE=3 SV=1	EIF3CL	B5ME19	5.64	105.407	914	26.1488	25	25	190000000	28	2.95405	3	3	12000000	3	31	3.22239
Isoform 3 of Cytoskeleton-associated protein 5 OS=Homo sapiens GN=CKAP5	CKAP5	Q14008-3	7.77	226.114	2039	5.54193	9	9	49000000	9	0.980873	1	1	14000000	1	10	3.16993
Dedicator of cytokinesis protein 7 OS=Homo sapiens GN=DOCK7 PE=1 SV=4	DOCK7	Q96N67	6.8	242.407	2140	5.93458	8	8	45000000	9	0.560748	1	1		1	10	3.16993
Zinc finger CCCH-type antiviral protein 1 OS=Homo sapiens GN=ZC3HAV1 PE=1 SV=3	ZC3HAV1	Q7Z2W4	8.4	101.367	902	11.7517	6	6	29000000	9	1.99557	1	1		1	10	3.16993
Talin-1 OS=Homo sapiens GN=TLN1 PE=1 SV=3	TLN1	Q9Y490	6.07	269.599	2541	8.26446	13	13	70000000	18	1.25935	2	2	7400000	2	20	3.16993
LIM and calponin homology domains-containing protein 1 OS=Homo sapiens GN=LIMCH1 PE=1 SV=4	LIMCH1	Q9UPQ0	6.47	121.792	1083	7.10988	5	5	22000000	9	1.20037	1	1	12000000	1	10	3.16993
ATP-dependent RNA helicase DDX1 OS=Homo sapiens GN=DDX1 PE=1 SV=2	DDX1	Q92499	7.23	82.38	740	38.3784	20	20	310000000	41	12.7027	5	5	23000000	5	46	3.03562
26S proteasome non-ATPase regulatory subunit 3 OS=Homo sapiens GN=PSMD3 PE=1 SV=2	PSMD3	O43242	8.44	60.939	534	9.92509	4	4	11000000	8	2.43446	1	1	15000000	1	9	3
Catenin alpha-2 OS=Homo sapiens GN=CTNNA2 PE=1 SV=5	CTNNA2	P26232	5.71	105.247	953	6.9255	5	1	26000000	8	1.88877	1	1	11000000	1	9	3
LIM and calponin homology domains-containing protein 1 OS=Homo sapiens GN=LIMCH1 PE=1 SV=1	LIMCH1	G5EA03	6.35	164.337	1467	4.15815	4	4	22000000	8	0.886162	1	1	12000000	1	9	3
Actin-related protein 2/3 complex subunit 1B OS=Homo sapiens GN=ARPC1B PE=1 SV=3	ARPC1B	O15143	8.35	40.923	372	18.8172	6	6	39000000	7	3.49462	1	1	9100000	1	8	2.80735
40S ribosomal protein S15 OS=Homo sapiens GN=RPS15 PE=1 SV=1	RPS15	S4R417	11.03	15.57	135	52.5926	4	4	150000000	14	29.6296	2	2		2	16	2.80735
Double-stranded RNA-binding protein Staufen homolog 1 OS=Homo sapiens GN=STAU1 PE=1 SV=2	STAU1	O95793	9.44	63.143	577	16.6378	7	7	37000000	7	2.42634	1	1	1800000	1	8	2.80735
DnaJ homolog subfamily A member 1 OS=Homo sapiens GN=DNAJA1 PE=1 SV=2	DNAJA1	P31689	7.08	44.839	397	34.7607	9	9	120000000	14	5.79345	2	2	20000000	2	16	2.80735
Retrotransposon-like protein 1 OS=Homo sapiens GN=RTL1 PE=2 SV=3	RTL1	A6NKG5	5.21	154.95	1358	26.0677	26	26	130000000	42	4.86009	6	6	22000000	6	48	2.80735
Isoform 4 of Kinesin-like protein KIF2A OS=Homo sapiens GN=KIF2A	KIF2A	O00139-4	6.37	84.037	744	31.4516	17	17	130000000	26	5.37634	4	4	21000000	4	30	2.70044
ELAV-like protein 3 OS=Homo sapiens GN=ELAVL3 PE=1 SV=3	ELAVL3	Q14576	9.28	39.522	367	31.8801	12	6	280000000	19	9.80926	3	1	37000000	3	22	2.66297
Eukaryotic translation initiation factor 3 subunit F OS=Homo sapiens GN=EIF3F PE=1 SV=1	EIF3F	O00303	5.45	37.54	357	42.577	12	12	250000000	19	4.7619	1	1	13000000	3	22	2.66297
Polyadenylate-binding protein 1 OS=Homo sapiens GN=PABPC1 PE=1 SV=2	PABPC1	P11940	9.5	70.626	636	53.4591	30	17	1600000000	55	13.522	7	7	38000000	9	64	2.61143
RNA binding motif protein 10, isoform CRA_d OS=Homo sapiens GN=RBM10 PE=1 SV=1	RBM10	A0A0A0MR66	6.28	110.299	995	6.63317	4	4	7900000	6	1.10553	1	1	13000000	1	7	2.58496
Isoform 4 of Four and a half LIM domains protein 1 OS=Homo sapiens GN=FHL1	FHL1	Q13642-4	8.32	34.973	309	31.7152	10	10	38000000	12	7.11974	2	2	25000000	2	14	2.58496
Copine-1 OS=Homo sapiens GN=CPNE1 PE=1 SV=1	CPNE1	A6PVH9	5.82	53.014	481	7.48441	2	2	67000000	6	3.3264	1	1	49000000	1	7	2.58496
DNA-directed RNA polymerases I, II, and III subunit RPABC1 OS=Homo sapiens GN=POLR2E PE=1 SV=4	POLR2E	P19388	5.95	24.536	210	44.7619	7	7	110000000	12	12.381	2	2	27000000	2	14	2.58496
Translational activator GCN1 OS=Homo sapiens GN=GCN1L1 PE=1 SV=6	GCN1L1	Q92616	7.47	292.572	2671	14.3766	25	25	89000000	29	2.17147	5	5	37000000	5	34	2.53605
Isoform 3 of Polyadenylate-binding protein 4 OS=Homo sapiens GN=PABPC4	PABPC4	Q13310-3	9.35	72.345	660	33.1818	21	11	890000000	34	7.72727	4	4	33000000	6	40	2.5025
Vacuolar protein sorting-associated protein 35 OS=Homo sapiens GN=VPS35 PE=1 SV=2	VPS35	Q96QK1	5.49	91.649	796	13.4422	8	8	50000000	11	3.26633	2	2	14000000	2	13	2.45943
Dynein light chain 1, cytoplasmic OS=Homo sapiens GN=DYNLL1 PE=1 SV=1	DYNLL1	P63167	7.4	10.359	89	49.4382	3	3	100000000	10	12.3596	1	1	85000000	2	12	2.32193
Eukaryotic translation initiation factor 6 OS=Homo sapiens GN=EIF6 PE=1 SV=1	EIF6	F8WDS6	9.48	20.117	186	27.3469	4	4	36000000	5	7.52688	1	1		1	6	2.32193
tRNA-splicing ligase RtcB homolog OS=Homo sapiens GN=RTCB PE=1 SV=1	RTCB	Q9Y3I0	7.23	55.175	505	46.3366	18	18	240000000	30	15.4455	6	6	56000000	6	36	2.32193
Isoform 2 of Transcription elongation factor B polypeptide 2 OS=Homo sapiens GN=TCEB2	TCEB2	Q15370-2	6.1	17.9	161	28.5714	3	3	27000000	5	15.528	1	1	20000000	1	6	2.32193
T-complex protein 1 subunit theta OS=Homo sapiens GN=CCT8 PE=1 SV=4	CCT8	P50990	5.6	59.583	548	43.2482	21	21	140000000	25	10.5839	5	5	27000000	5	30	2.32193
Zinc finger protein ubi-d4 OS=Homo sapiens GN=DPF2 PE=1 SV=2	DPF2	Q92785	6.33	44.127	391	16.3683	4	4	12000000	5	4.09207	1	1	13000000	1	6	2.32193
Leucine-rich repeat-containing protein 47 OS=Homo sapiens GN=LRRC47 PE=1 SV=1	LRRC47	Q8N1G4	8.28	63.434	583	12.8645	5	5	25000000	5	3.08748	1	1	19000000	1	6	2.32193
Protein arginine N-methyltransferase 1 OS=Homo sapiens GN=PRMT1 PE=1 SV=1	PRMT1	A0A087X1W2	5.68	32.672	285	32.6316	7	7	76000000	10	11.5789	2	2	8100000	2	12	2.32193
SWI/SNF complex subunit SMARCC2 OS=Homo sapiens GN=SMARCC2 PE=1 SV=1	SMARCC2	F8VZW6	9.35	11.746	105	10.6024	12	7	150000000	14	14.2857	1	1	7100000	3	17	2.22239
Guanine nucleotide-binding protein subunit beta-2-like 1 OS=Homo sapiens GN=GNB2L1 PE=1 SV=3	GNB2L1	P63244	7.69	35.055	317	57.4132	13	13	350000000	37	24.6057	6	6	35000000	8	45	2.20945
Transportin-1 OS=Homo sapiens GN=TNPO1 PE=1 SV=2	TNPO1	Q92973	4.98	102.289	898	32.4053	19	15	200000000	30	7.12695	6	6	31000000	7	37	2.09954
Nuclease-sensitive element-binding protein 1 OS=Homo sapiens GN=YBX1 PE=1 SV=3	YBX1	P67809	9.88	35.903	324	58.642	21	17	1600000000	64	39.1975	8	8	64000000	15	79	2.09311
Zyxin OS=Homo sapiens GN=ZYX PE=1 SV=1	ZYX	Q15942	6.67	61.238	572	10.1399	4	4	21000000	4	2.62238	1	1	950000	1	5	2
U1 small nuclear ribonucleoprotein A OS=Homo sapiens GN=SNRPA PE=1 SV=3	SNRPA	P09012	9.83	31.259	282	13.4752	2	2	36000000	4	2.83688	1	1	9000000	1	5	2
Protein S100-A9 OS=Homo sapiens GN=S100A9 PE=1 SV=1	S100A9	P06702	6.13	13.234	114	24.5614	2	2	77000000	4	13.1579	1	1	16000000	1	5	2
Importin subunit alpha-5 OS=Homo sapiens GN=KPNA1 PE=1 SV=3	KPNA1	P52294	5.01	60.184	538	4.64684	2	2	99000000	4	2.60223	1	1	29000000	1	5	2
Cleavage stimulation factor subunit 1 OS=Homo sapiens GN=CSTF1 PE=1 SV=1	CSTF1	Q05048	6.58	48.327	431	25.7541	8	8	83000000	12	9.74478	3	3	15000000	3	15	2
Cleavage stimulation factor subunit 2 OS=Homo sapiens GN=CSTF2 PE=1 SV=1	CSTF2	E9PID8	8.03	46.636	438	11.1872	3	1	20000000	4	2.51142	1	1	6500000	1	5	2
ADP-ribosylation factor 4 OS=Homo sapiens GN=ARF4 PE=1 SV=3	ARF4	P18085	7.14	20.498	180	16.6667	2	1	45000000	4	11.1111	1	1		1	5	2
T-complex protein 1 subunit alpha OS=Homo sapiens GN=TCP1 PE=1 SV=1	TCP1	F5GZI8	4.48	10.354	100	42	4	4	90000000	4	10	1	1	63000000	1	5	2
60S ribosomal protein L36a-like OS=Homo sapiens GN=RPL36AL PE=1 SV=3	RPL36AL	Q969Q0	10.65	12.461	106	29.2453	4	1	110000000	4	8.49057	1	1	110000000	1	5	2
Ubiquitin carboxyl-terminal hydrolase 5 OS=Homo sapiens GN=USP5 PE=1 SV=2	USP5	P45974	5.03	95.725	858	9.09091	4	4	15000000	4	1.28205	1	1	18000000	1	5	2
Isoform 4 of YLP motif-containing protein 1 OS=Homo sapiens GN=YLPM1	YLPM1	P49750-4	6.55	241.495	2146	1.63094	2	2	13000000	4	0.372787	1	1	17000000	1	5	2
Zinc finger protein ubi-d4 OS=Homo sapiens GN=DPF2 PE=1 SV=1	DPF2	J3KMZ8	6.98	45.751	405	10.6173	3	3	12000000	4	3.95062	1	1	13000000	1	5	2
Four and a half LIM domains protein 1 OS=Homo sapiens GN=FHL1 PE=1 SV=4	FHL1	Q13642	8.97	36.239	323	20.743	7	7	24000000	8	6.81115	2	2	25000000	2	10	2
RuvB-like 2 OS=Homo sapiens GN=RUVBL2 PE=1 SV=3	RUVBL2	Q9Y230	5.64	51.125	463	54.6436	25	25	740000000	47	28.5097	10	10	110000000	12	59	1.96963
Far upstream element-binding protein 3 OS=Homo sapiens GN=FUBP3 PE=1 SV=2	FUBP3	Q96I24	8.38	61.602	572	54.5455	21	17	330000000	39	20.2797	9	6	83000000	10	49	1.96347
Serine/threonine-protein phosphatase 2A 65 kDa regulatory subunit A alpha isoform OS=Homo sapiens GN=PPP2R1A PE=1 SV=4	PPP2R1A	P30153	5.11	65.267	589	42.7844	18	18	220000000	27	17.657	7	7	30000000	7	34	1.94753
Guanine nucleotide-binding protein subunit beta-2-like 1 (Fragment) OS=Homo sapiens GN=GNB2L1 PE=1 SV=1	GNB2L1	H0YAM7	7.85	27.398	247	50.6073	8	8	330000000	23	26.3158	4	4	18000000	6	29	1.9386
Golgin subfamily A member 2 OS=Homo sapiens GN=GOLGA2 PE=1 SV=3	GOLGA2	Q08379	5.02	113.017	1002	35.5289	27	27	250000000	46	11.477	8	8	23000000	12	58	1.9386
Isoform 2 of Catenin alpha-1 OS=Homo sapiens GN=CTNNA1	CTNNA1	P35221-2	6.34	102.571	930	20.4301	14	10	45000000	19	6.55914	5	5	17000000	5	24	1.926
Isoform LCRMP-4 of Dihydropyrimidinase-related protein 3 OS=Homo sapiens GN=DPYSL3	DPYSL3	Q14195-2	6.35	73.865	684	44.0058	22	19	240000000	38	20.0292	10	9	73000000	10	48	1.926
ATP-dependent RNA helicase DDX3X OS=Homo sapiens GN=DDX3X PE=1 SV=3	DDX3X	O00571	7.18	73.198	662	48.6405	26	25	610000000	49	24.0181	12	12	59000000	13	62	1.91427
Clathrin heavy chain 1 OS=Homo sapiens GN=CLTC PE=1 SV=1	CLTC	J3QL20	8.32	10.61	97	70.1031	4	4	140000000	15	34.0206	1	1	18000000	4	19	1.90689
Staphylococcal nuclease domain-containing protein 1 OS=Homo sapiens GN=SND1 PE=1 SV=1	SND1	Q7KZF4	7.17	101.934	910	22.1978	12	12	69000000	15	6.81319	4	4	20000000	4	19	1.90689
60S ribosomal protein L19 OS=Homo sapiens GN=RPL19 PE=1 SV=1	RPL19	J3KTE4	11.47	23.233	194	19.0722	4	4	260000000	11	18.5567	3	3	160000000	3	14	1.87447
RNA-binding protein Musashi homolog 2 OS=Homo sapiens GN=MSI2 PE=1 SV=1	MSI2	B4DM51	9.04	28.758	267	22.8464	5	5	110000000	11	13.4831	3	3	11000000	3	14	1.87447
Isoform LCRMP-1 of Dihydropyrimidinase-related protein 1 OS=Homo sapiens GN=CRMP1	CRMP1	Q14194-2	6.86	74.216	686	15.0146	8	5	150000000	11	5.24781	3	2	34000000	3	14	1.87447
Septin-7 OS=Homo sapiens GN=SEPT7 PE=1 SV=2	SEPT7	E7EPK1	8.63	50.663	437	34.3249	12	11	270000000	22	16.0183	5	5	96000000	6	28	1.87447
Cullin-associated NEDD8-dissociated protein 1 OS=Homo sapiens GN=CAND1 PE=1 SV=2	CAND1	Q86VP6	5.78	136.289	1230	8.37398	7	7	20000000	7	2.27642	2	2	6600000	2	9	1.80735
Isoform 2 of Stress-induced-phosphoprotein 1 OS=Homo sapiens GN=STIP1	STIP1	P31948-2	7.74	68.037	590	17.7966	8	8	110000000	14	7.62712	4	4	36000000	4	18	1.80735
Thioredoxin OS=Homo sapiens GN=TXN PE=1 SV=3	TXN	P10599	4.92	11.73	105	32.381	3	3	240000000	7	20.9524	2	2	66000000	2	9	1.80735
T-complex protein 1 subunit epsilon OS=Homo sapiens GN=CCT5 PE=1 SV=1	CCT5	P48643	5.66	59.633	541	36.2292	17	16	130000000	21	13.1238	5	5	24000000	6	27	1.80735
DNA-directed RNA polymerase II subunit RPB2 OS=Homo sapiens GN=POLR2B PE=1 SV=1	POLR2B	P30876	6.87	133.811	1174	7.06985	6	6	28000000	7	2.8109	2	2	17000000	2	9	1.80735
Isoform 2 of Eukaryotic initiation factor 4A-II OS=Homo sapiens GN=EIF4A2	EIF4A2	Q14240-2	5.48	46.46	408	29.902	10	3	650000000	21	9.80392	3	2	68000000	6	27	1.80735
Nestin OS=Homo sapiens GN=NES PE=1 SV=2	NES	P48681	4.36	177.332	1621	40.839	52	52	360000000	90	17.1499	21	21	63000000	26	116	1.79141
Plectin OS=Homo sapiens GN=PLEC PE=1 SV=3	PLEC	Q15149	5.96	531.466	4684	29.0564	105	105	190000000	134	10.5679	39	39	48000000	40	174	1.74416
Valine--tRNA ligase OS=Homo sapiens GN=VARS PE=1 SV=4	VARS	P26640	7.59	140.387	1264	11.2342	9	9	37000000	10	3.24367	3	3	24000000	3	13	1.73697
Eukaryotic translation initiation factor 2A OS=Homo sapiens GN=EIF2A PE=1 SV=3	EIF2A	Q9BY44	8.87	64.949	585	14.188	5	5	26000000	10	3.4188	1	1	6200000	3	13	1.73697
AT-rich interactive domain-containing protein 1A OS=Homo sapiens GN=ARID1A PE=1 SV=3	ARID1A	O14497	6.7	241.892	2285	5.73304	8	7	18000000	10	1.88184	3	3	7400000	3	13	1.73697
T-complex protein 1 subunit delta OS=Homo sapiens GN=CCT4 PE=1 SV=4	CCT4	P50991	7.83	57.888	539	50.8349	21	20	250000000	26	14.2857	7	7	46000000	8	34	1.70044
Complement component 1 Q subcomponent-binding protein, mitochondrial OS=Homo sapiens GN=C1QBP PE=1 SV=1	C1QBP	Q07021	4.84	31.343	282	32.2695	4	4	120000000	13	9.57447	1	1	32000000	4	17	1.70044
Fatty acid synthase OS=Homo sapiens GN=FASN PE=1 SV=3	FASN	P49327	6.44	273.254	2511	22.3019	32	32	110000000	45	8.2039	13	13	41000000	14	59	1.6845
Histone deacetylase 2 OS=Homo sapiens GN=HDAC2 PE=1 SV=2	HDAC2	Q92769	5.91	55.329	488	15.5738	6	6	88000000	16	9.63115	4	4	55000000	5	21	1.67807
Importin subunit beta-1 OS=Homo sapiens GN=KPNB1 PE=1 SV=2	KPNB1	Q14974	4.78	97.108	876	34.9315	17	17	460000000	43	15.2968	9	9	190000000	14	57	1.61891
Cytoplasmic dynein 1 heavy chain 1 OS=Homo sapiens GN=DYNC1H1 PE=1 SV=5	DYNC1H1	Q14204	6.4	532.072	4646	15.0237	48	48	120000000	70	4.84288	16	16	43000000	23	93	1.60572
Uncharacterized protein (Fragment) OS=Homo sapiens PE=4 SV=1	NOGENE	I3L3B4	8.73	11.076	104	6.50096	3	3	46000000	3	12.5	1	1	25000000	1	4	1.58496
Isoform 4 of Heat shock protein 105 kDa OS=Homo sapiens GN=HSPH1	HSPH1	Q92598-4	5.72	97.398	860	15.3488	10	8	120000000	12	4.53488	3	2	15000000	4	16	1.58496
Isoleucine--tRNA ligase, cytoplasmic OS=Homo sapiens GN=IARS PE=1 SV=2	IARS	P41252	6.15	144.406	1262	9.90491	10	10	71000000	15	4.67512	5	5	29000000	5	20	1.58496
Protein mab-21-like 1 OS=Homo sapiens GN=MAB21L1 PE=2 SV=1	MAB21L1	Q13394	8.66	40.93	359	7.79944	3	3	20000000	3	2.22841	1	1	15000000	1	4	1.58496
Coatomer subunit beta' OS=Homo sapiens GN=COPB2 PE=1 SV=2	COPB2	P35606	5.27	102.422	906	4.41501	3	3	20000000	3	1.10375	1	1	7000000	1	4	1.58496
Transmembrane emp24 domain-containing protein 10 OS=Homo sapiens GN=TMED10 PE=1 SV=2	TMED10	P49755	7.44	24.96	219	10.5023	2	2	20000000	3	5.02283	1	1	20000000	1	4	1.58496
Kinesin heavy chain isoform 5C OS=Homo sapiens GN=KIF5C PE=1 SV=1	KIF5C	O60282	6.19	109.427	957	12.6437	10	5	80000000	12	5.32915	4	1	25000000	4	16	1.58496
BolA-like protein 2 OS=Homo sapiens GN=BOLA2 PE=1 SV=1	BOLA2	Q9H3K6	6.52	10.11	86	40.6977	2	2	44000000	3	18.6047	1	1	12000000	1	4	1.58496
H/ACA ribonucleoprotein complex subunit 2 OS=Homo sapiens GN=NHP2 PE=1 SV=1	NHP2	Q9NX24	8.22	17.19	153	12.4183	1	1	24000000	3	12.4183	1	1	38000000	1	4	1.58496
Ubiquitin-60S ribosomal protein L40 (Fragment) OS=Homo sapiens GN=UBA52 PE=1 SV=1	UBA52	M0R1M6	10.2	12.795	114	14.4928	3	2	31000000	3	7.89474	1	0	29000000	1	4	1.58496
Tight junction protein 1 (Zona occludens 1), isoform CRA_a OS=Homo sapiens GN=TJP1 PE=1 SV=1	TJP1	G3V1L9	6.67	197.339	1768	2.54525	3	3	19000000	3	1.07466	1	1	4700000	1	4	1.58496
Importin-7 OS=Homo sapiens GN=IPO7 PE=1 SV=1	IPO7	O95373	4.82	119.44	1038	7.41811	5	5	42000000	9	3.08285	3	3	26000000	3	12	1.58496
Pleckstrin homology domain-containing family A member 6 OS=Homo sapiens GN=PLEKHA6 PE=1 SV=1	PLEKHA6	Q5VTI5	8.92	119.218	1068	7.49064	6	6	23000000	6	1.77903	2	2		2	8	1.58496
Trifunctional purine biosynthetic protein adenosine-3 OS=Homo sapiens GN=GART PE=1 SV=1	GART	F8WD69	6.3	32.262	306	17.9739	3	3	14000000	3	5.22876	1	1	3000000	1	4	1.58496
60S ribosomal protein L21 OS=Homo sapiens GN=RPL21 PE=1 SV=2	RPL21	P46778	10.49	18.553	160	20.625	3	3	47000000	6	9.375	1	1	210000000	2	8	1.58496
Eukaryotic translation initiation factor 5B OS=Homo sapiens GN=EIF5B PE=1 SV=1	EIF5B	A0A087WUT6	5.58	138.597	1220	4.01639	3	3	8900000	3	0.901639	1	1	10000000	1	4	1.58496
26S protease regulatory subunit 8 OS=Homo sapiens GN=PSMC5 PE=1 SV=1	PSMC5	P62195	7.55	45.597	406	8.12808	3	2	99000000	3	3.20197	1	1	11000000	1	4	1.58496
Beta-catenin-like protein 1 OS=Homo sapiens GN=CTNNBL1 PE=1 SV=1	CTNNBL1	A0A087WUB9	5.02	65.661	568	5.28169	3	3	18000000	3	1.40845	1	1	20000000	1	4	1.58496
Myristoylated alanine-rich C-kinase substrate OS=Homo sapiens GN=MARCKS PE=1 SV=4	MARCKS	P29966	4.45	31.536	332	18.3735	3	3		3	5.42169	1	1	11000000	1	4	1.58496
Cyclin-dependent-like kinase 5 OS=Homo sapiens GN=CDK5 PE=1 SV=3	CDK5	Q00535	7.66	33.283	292	10.274	3	3	26000000	3	2.73973	1	0	110000000	1	4	1.58496
Keratin, type II cytoskeletal 74 OS=Homo sapiens GN=KRT74 PE=1 SV=1	KRT74	F8W1S1	7.44	59.37	543	7.55064	5	2	440000000	9	5.52486	3	0	590000000	3	12	1.58496
14-3-3 protein eta OS=Homo sapiens GN=YWHAH PE=1 SV=4	YWHAH	Q04917	4.84	28.201	246	32.1138	9	4	520000000	12	10.5691	3	0	140000000	4	16	1.58496
Apolipoprotein C-III OS=Homo sapiens GN=APOC3 PE=1 SV=1	APOC3	B0YIW2	8.18	12.807	117	13.6752	1	1	12000000	3	13.6752	1	1	3400000	1	4	1.58496
Isoform 3 of Alpha-adducin OS=Homo sapiens GN=ADD1	ADD1	P35611-3	5.96	84.25	768	12.3698	5	5	39000000	12	9.11458	4	4	31000000	4	16	1.58496
Cleavage and polyadenylation specificity factor subunit 3 OS=Homo sapiens GN=CPSF3 PE=1 SV=1	CPSF3	Q9UKF6	5.6	77.436	684	4.38596	3	3	19000000	3	1.46199	1	1	15000000	1	4	1.58496
Isoform 5 of Serine/threonine-protein phosphatase 2A 56 kDa regulatory subunit gamma isoform OS=Homo sapiens GN=PPP2R5C	PPP2R5C	Q13362-5	6.74	64.251	555	8.46847	3	3	9000000	3	2.34234	1	1		1	4	1.58496
Cell division cycle and apoptosis regulator protein 1 OS=Homo sapiens GN=CCAR1 PE=1 SV=2	CCAR1	Q8IX12	5.76	132.739	1150	4.6087	3	3		3	1.04348	1	1	15000000	1	4	1.58496
Superkiller viralicidic activity 2-like 2 OS=Homo sapiens GN=SKIV2L2 PE=1 SV=3	SKIV2L2	P42285	6.52	117.729	1042	4.03071	3	3	17000000	3	0.959693	1	1	13000000	1	4	1.58496
T-complex protein 1 subunit gamma OS=Homo sapiens GN=CCT3 PE=1 SV=4	CCT3	P49368	6.49	60.495	545	47.7064	20	20	440000000	35	20.7339	9	9	100000000	12	47	1.54432
40S ribosomal protein S9 OS=Homo sapiens GN=RPS9 PE=1 SV=3	RPS9	P46781	10.65	22.578	194	46.9072	13	13	570000000	17	23.7113	5	5	160000000	6	23	1.5025
Kinesin-1 heavy chain OS=Homo sapiens GN=KIF5B PE=1 SV=1	KIF5B	P33176	6.51	109.617	963	11.4226	9	4	80000000	11	4.6729	4	1	24000000	4	15	1.45943
RNA-binding protein 8A OS=Homo sapiens GN=RBM8A PE=1 SV=1	RBM8A	Q9Y5S9	5.72	19.877	174	56.3218	5	5	310000000	11	22.4138	3	3	54000000	4	15	1.45943
Isoform 4 of 40S ribosomal protein S24 OS=Homo sapiens GN=RPS24	RPS24	P62847-4	10.15	32.41	289	13.8408	5	5	230000000	11	7.95848	2	2	56000000	4	15	1.45943
Heat shock 70 kDa protein 1A/1B OS=Homo sapiens GN=HSPA1A PE=1 SV=5	HSPA1A	P08107	5.66	70.009	641	43.0577	21	18	490000000	41	21.5289	12	8	210000000	15	56	1.45066
40S ribosomal protein S3a OS=Homo sapiens GN=RPS3A PE=1 SV=2	RPS3A	P61247	9.73	29.926	264	51.8939	16	16	530000000	30	26.5152	6	6	110000000	11	41	1.44746
Isoform Short of 14-3-3 protein beta/alpha OS=Homo sapiens GN=YWHAB	YWHAB	P31946-2	4.83	27.833	244	63.1148	14	8	520000000	27	28.2787	6	3	140000000	10	37	1.43296
Transitional endoplasmic reticulum ATPase OS=Homo sapiens GN=VCP PE=1 SV=4	VCP	P55072	5.26	89.266	806	21.2159	11	11	50000000	16	12.2829	6	6	21000000	6	22	1.41504
SWI/SNF complex subunit SMARCC1 OS=Homo sapiens GN=SMARCC1 PE=1 SV=3	SMARCC1	Q92922	5.76	122.79	1105	15.2941	14	9	150000000	16	4.52489	5	1	53000000	6	22	1.41504
Isoform 2 of Transportin-2 OS=Homo sapiens GN=TNPO2	TNPO2	O14787-2	4.98	100.343	887	7.44081	5	1	160000000	8	3.26945	3	3	23000000	3	11	1.41504
Plasminogen activator inhibitor 1 RNA-binding protein OS=Homo sapiens GN=SERBP1 PE=1 SV=2	SERBP1	Q8NC51	8.65	44.938	408	32.3529	12	12	130000000	13	13.2353	5	5	55000000	5	18	1.37851
14-3-3 protein gamma OS=Homo sapiens GN=YWHAG PE=1 SV=2	YWHAG	P61981	4.89	28.285	247	70.8502	16	10	520000000	26	38.8664	8	5	140000000	10	36	1.37851
14-3-3 protein beta/alpha OS=Homo sapiens GN=YWHAB PE=1 SV=3	YWHAB	P31946	4.83	28.065	246	58.9431	13	7	520000000	26	28.0488	6	3	140000000	10	36	1.37851
40S ribosomal protein SA OS=Homo sapiens GN=RPSA PE=4 SV=1	RPSA	A0A0C4DG17	4.87	33.293	300	50.6667	8	8	350000000	18	25	4	4	120000000	7	25	1.36257
RuvB-like 1 OS=Homo sapiens GN=RUVBL1 PE=1 SV=1	RUVBL1	Q9Y265	6.42	50.196	456	68.8596	22	22	1200000000	56	47.1491	15	15	250000000	22	78	1.34792
Centrosomal protein of 170 kDa OS=Homo sapiens GN=CEP170 PE=1 SV=1	CEP170	Q5SW79	7.11	175.187	1584	22.1843	4	4	98000000	5	2.08333	2	2	11000000	2	7	1.32193
Ribosomal RNA processing protein 1 homolog B OS=Homo sapiens GN=RRP1B PE=1 SV=3	RRP1B	Q14684	9.76	84.375	758	10.5541	4	4	24000000	5	2.90237	2	2	28000000	2	7	1.32193
SWI/SNF-related matrix-associated actin-dependent regulator of chromatin subfamily E member 1 OS=Homo sapiens GN=SMARCE1 PE=1 SV=2	SMARCE1	Q969G3	4.88	46.621	411	14.3552	4	4	93000000	5	5.59611	2	2	37000000	2	7	1.32193
40S ribosomal protein S2 OS=Homo sapiens GN=RPS2 PE=1 SV=2	RPS2	P15880	10.24	31.305	293	43.686	11	11	490000000	15	22.5256	6	6	150000000	6	21	1.32193
Alpha-enolase OS=Homo sapiens GN=ENO1 PE=1 SV=2	ENO1	P06733	7.39	47.139	434	36.1751	12	12	180000000	20	17.9724	7	7	120000000	8	28	1.32193
Ribonuclease inhibitor OS=Homo sapiens GN=RNH1 PE=1 SV=2	RNH1	P13489	4.82	49.941	461	16.7028	5	5	39000000	5	5.20607	2	2	8100000	2	7	1.32193
Syndecan binding protein (Syntenin), isoform CRA_a OS=Homo sapiens GN=SDCBP PE=1 SV=1	SDCBP	G5EA09	8.51	34.797	318	17.2956	2	2	5600000	5	10.6918	1	1		2	7	1.32193
ADP-ribosylation factor 3 OS=Homo sapiens GN=ARF3 PE=1 SV=2	ARF3	P61204	7.43	20.588	181	29.2818	3	2		5	19.337	2	2	9400000	2	7	1.32193
40S ribosomal protein S12 OS=Homo sapiens GN=RPS12 PE=1 SV=3	RPS12	P25398	7.21	14.505	132	33.3333	4	4	280000000	5	18.9394	2	2	27000000	2	7	1.32193
ATPase family AAA domain-containing protein 3A OS=Homo sapiens GN=ATAD3A PE=1 SV=2	ATAD3A	Q9NVI7	8.98	71.325	634	9.14826	5	5	32000000	5	5.04732	2	2	18000000	2	7	1.32193
Uncharacterized protein (Fragment) OS=Homo sapiens PE=4 SV=2	NOGENE	V9GYP5	9.31	23.775	217	16.0338	4	4	170000000	5	15.6682	2	2	18000000	2	7	1.32193
Nuclear pore complex protein Nup88 OS=Homo sapiens GN=NUP88 PE=1 SV=2	NUP88	Q99567	5.69	83.489	741	9.58165	4	4	28000000	5	3.10391	2	2	20000000	2	7	1.32193
Serine/threonine-protein phosphatase 2A catalytic subunit alpha isoform OS=Homo sapiens GN=PPP2CA PE=1 SV=1	PPP2CA	P67775	5.54	35.571	309	52.1036	10	1	130000000	17	25.2427	5	5	49000000	7	24	1.28011
T-complex protein 1 subunit beta OS=Homo sapiens GN=CCT2 PE=1 SV=4	CCT2	P78371	6.46	57.452	535	58.8785	22	22	200000000	29	28.2243	10	10	78000000	12	41	1.27302
Isoform 3 of Poly(rC)-binding protein 2 OS=Homo sapiens GN=PCBP2	PCBP2	Q15366-3	6.79	38.197	362	54.1436	13	9	1000000000	29	36.4641	9	4	270000000	12	41	1.27302
40S ribosomal protein S14 OS=Homo sapiens GN=RPS14 PE=1 SV=3	RPS14	P62263	10.05	16.263	151	70.1987	9	9	440000000	26	35.0993	7	7	170000000	11	37	1.24101
Delta-1-pyrroline-5-carboxylate synthase OS=Homo sapiens GN=ALDH18A1 PE=1 SV=2	ALDH18A1	P54886	7.12	87.248	795	25.5346	16	16	170000000	21	12.956	7	7	22000000	9	30	1.22239
ELAV-like protein OS=Homo sapiens GN=ELAVL4 PE=1 SV=1	ELAVL4	B1APY8	9.38	42.371	385	17.1429	7	1	220000000	7	9.35065	3	1	12000000	3	10	1.22239
Isoform 2 of Lysine-specific histone demethylase 1A OS=Homo sapiens GN=KDM1A	KDM1A	O60341-2	6.25	95.096	876	9.01826	5	5	41000000	7	5.3653	3	3	28000000	3	10	1.22239
Isoform 2 of Coatomer subunit alpha OS=Homo sapiens GN=COPA	COPA	P53621-2	7.59	139.235	1233	7.46148	7	7	28000000	7	3.00081	3	3	15000000	3	10	1.22239
Isoform 2 of Poly(rC)-binding protein 2 OS=Homo sapiens GN=PCBP2	PCBP2	Q15366-2	6.79	38.627	366	50.2732	12	8	1000000000	27	36.0656	9	4	270000000	12	39	1.16993
Isoform 2 of Actin-related protein 2 OS=Homo sapiens GN=ACTR2	ACTR2	P61160-2	7.2	45.348	399	32.8321	7	7	68000000	9	12.0301	4	4	28000000	4	13	1.16993
DAZ-associated protein 1 OS=Homo sapiens GN=DAZAP1 PE=1 SV=1	DAZAP1	Q96EP5	8.56	43.356	407	20.1474	6	6	71000000	9	15.2334	4	4	14000000	4	13	1.16993
Microtubule-associated protein OS=Homo sapiens GN=MAP4 PE=1 SV=1	MAP4	F8W9U4	9.22	88.222	828	9.54106	6	6	52000000	9	5.43478	4	4	15000000	4	13	1.16993
40S ribosomal protein S3 OS=Homo sapiens GN=RPS3 PE=1 SV=2	RPS3	P23396	9.66	26.671	243	70.7819	16	16	690000000	38	59.6708	13	13	200000000	17	55	1.16046
Poly(rC)-binding protein 1 OS=Homo sapiens GN=PCBP1 PE=1 SV=2	PCBP1	Q15365	7.09	37.474	356	70.5056	14	10	680000000	38	54.7753	11	7	240000000	17	55	1.16046
Isoform 2 of Annexin A2 OS=Homo sapiens GN=ANXA2	ANXA2	P07355-2	8.37	40.386	357	50.7003	13	13	120000000	26	35.2941	9	9	57000000	12	38	1.11548
Poly(rC)-binding protein 3 OS=Homo sapiens GN=PCBP3 PE=2 SV=2	PCBP3	P57721	8.07	39.44	371	21.8329	7	3	700000000	17	19.407	6	1	87000000	8	25	1.08746
Alpha-internexin OS=Homo sapiens GN=INA PE=1 SV=2	INA	Q16352	5.4	55.357	499	49.2986	26	24	1200000000	43	36.2725	18	16	320000000	21	64	1.03395
CSNK2A1 protein OS=Homo sapiens GN=CSNK2A1 PE=1 SV=1	CSNK2A1	Q5U5J2	7.96	45.879	397	15.3652	4	4	41000000	8	9.82368	2	2	16000000	4	12	1
Protein mago nashi homolog 2 OS=Homo sapiens GN=MAGOHB PE=1 SV=1	MAGOHB	Q96A72	6.39	17.265	148	61.4865	9	9	600000000	16	54.0541	6	6	84000000	8	24	1
Peroxiredoxin-4 OS=Homo sapiens GN=PRDX4 PE=1 SV=1	PRDX4	Q13162	6.29	30.521	271	11.0701	4	1	150000000	6	9.5941	3	1	97000000	3	9	1
Putative oxidoreductase GLYR1 OS=Homo sapiens GN=GLYR1 PE=1 SV=3	GLYR1	Q49A26	9.17	60.518	553	7.4141	2	2	16000000	2	2.89331	1	1	8100000	1	3	1
Pre-mRNA-splicing factor SPF27 OS=Homo sapiens GN=BCAS2 PE=1 SV=1	BCAS2	O75934	5.66	26.115	225	16	2	2	51000000	4	13.7778	2	2	12000000	2	6	1
Transcription elongation regulator 1 OS=Homo sapiens GN=TCERG1 PE=1 SV=2	TCERG1	O14776	8.65	123.823	1098	1.82149	2	2	15000000	2	1.27505	1	1	12000000	1	3	1
Ribonucleoprotein PTB-binding 1 OS=Homo sapiens GN=RAVER1 PE=1 SV=1	RAVER1	E9PAU2	8.92	79.529	756	4.49735	2	2	11000000	2	1.71958	1	1	13000000	1	3	1
Hsp90 co-chaperone Cdc37 OS=Homo sapiens GN=CDC37 PE=1 SV=1	CDC37	Q16543	5.25	44.44	378	12.963	4	4	48000000	4	10.3175	2	2	27000000	2	6	1
Serine/threonine-protein phosphatase 2A 56 kDa regulatory subunit delta isoform OS=Homo sapiens GN=PPP2R5D PE=1 SV=1	PPP2R5D	Q14738	8.13	69.947	602	5.31561	2	2	9300000	2	2.15947	1	1		1	3	1
Histone deacetylase complex subunit SAP18 OS=Homo sapiens GN=SAP18 PE=1 SV=1	SAP18	X6RAL5	9.8	19.514	172	21.5116	4	4	150000000	4	18.6047	2	2	81000000	2	6	1
Arginine and glutamate-rich protein 1 OS=Homo sapiens GN=ARGLU1 PE=1 SV=1	ARGLU1	Q9NWB6	10.35	33.197	273	5.86081	2	2	92000000	2	2.9304	1	1	65000000	1	3	1
60S ribosomal protein L36a OS=Homo sapiens GN=RPL36A PE=3 SV=1	RPL36A	J3KQN4	10.43	16.368	142	21.831	4	1	110000000	4	13.3803	2	2	66000000	2	6	1
Carnitine O-palmitoyltransferase 1, liver isoform OS=Homo sapiens GN=CPT1A PE=1 SV=2	CPT1A	P50416	8.65	88.311	773	3.23415	2	2	7700000	2	1.81113	1	1	15000000	1	3	1
F-actin-capping protein subunit alpha-2 OS=Homo sapiens GN=CAPZA2 PE=1 SV=3	CAPZA2	P47755	5.85	32.929	286	9.79021	2	1	190000000	2	3.4965	1	1	86000000	1	3	1
Ubiquitin carboxyl-terminal hydrolase isozyme L1 OS=Homo sapiens GN=UCHL1 PE=1 SV=2	UCHL1	P09936	5.48	24.808	223	25.1121	4	4	58000000	6	22.4215	3	3	41000000	3	9	1
40S ribosomal protein S10 OS=Homo sapiens GN=RPS10 PE=1 SV=1	RPS10	P46783	10.15	18.886	165	29.697	5	5	340000000	8	14.5455	2	2	260000000	4	12	1
Protein HSPE1-MOB4 OS=Homo sapiens GN=HSPE1-MOB4 PE=3 SV=1	HSPE1-MOB4	S4R3N1	6.16	29.718	261	8.42912	2	2	11000000	2	2.68199	1	1		1	3	1
Kinesin heavy chain isoform 5A OS=Homo sapiens GN=KIF5A PE=1 SV=2	KIF5A	Q12840	5.9	117.306	1032	7.46124	6	1	80000000	8	4.36047	4	1	24000000	4	12	1
GMP synthase [glutamine-hydrolyzing] OS=Homo sapiens GN=GMPS PE=1 SV=1	GMPS	P49915	6.87	76.667	693	3.1746	2	2	15000000	2	1.5873	1	1	20000000	1	3	1
40S ribosomal protein S26 OS=Homo sapiens GN=RPS26 PE=1 SV=3	RPS26	P62854	11	13.007	115	50.4348	5	5	410000000	6	24.3478	3	3	160000000	3	9	1
Peptidyl-prolyl cis-trans isomerase D OS=Homo sapiens GN=PPID PE=1 SV=3	PPID	Q08752	7.21	40.738	370	12.1622	4	4	34000000	4	4.59459	2	2	40000000	2	6	1
Isoform 3 of Protein scribble homolog OS=Homo sapiens GN=SCRIB	SCRIB	Q14160-3	5.11	177.586	1655	5.01511	5	5	19000000	6	2.47734	2	2	12000000	3	9	1
Protein RPL17-C18orf32 OS=Homo sapiens GN=RPL17-C18orf32 PE=1 SV=1	RPL17-C18orf32	A0A0A6YYL6	10.1	26.356	228	27.193	6	6	200000000	12	22.3684	4	4	110000000	6	18	1
26S protease regulatory subunit 7 OS=Homo sapiens GN=PSMC2 PE=1 SV=3	PSMC2	P35998	5.95	48.603	433	6.46651	2	2	19000000	2	2.54042	1	1	23000000	1	3	1
LanC-like protein 1 OS=Homo sapiens GN=LANCL1 PE=1 SV=1	LANCL1	O43813	7.75	45.254	399	24.5614	7	7	230000000	8	11.2782	3	3	73000000	4	12	1
BAG family molecular chaperone regulator 2 OS=Homo sapiens GN=BAG2 PE=1 SV=1	BAG2	O95816	6.7	23.757	211	8.53081	2	2	32000000	2	4.73934	1	1	8400000	1	3	1
Programmed cell death protein 6 OS=Homo sapiens GN=PDCD6 PE=1 SV=1	PDCD6	A0A087WZ38	5.21	13.95	123	8.94309	1	1	240000000	2	8.94309	1	1	18000000	1	3	1
Sorcin OS=Homo sapiens GN=SRI PE=1 SV=1	SRI	C9J0K6	5.6	17.594	155	17.0886	2	2	39000000	2	7.09677	1	1	39000000	1	3	1
Isoform 2 of Serine/threonine-protein phosphatase 2A 55 kDa regulatory subunit B alpha isoform OS=Homo sapiens GN=PPP2R2A	PPP2R2A	P63151-2	6.49	52.966	457	5.47046	2	2	35000000	2	3.06346	1	1	8400000	1	3	1
Ubiquitin-40S ribosomal protein S27a OS=Homo sapiens GN=RPS27A PE=1 SV=2	RPS27A	P62979	9.64	17.953	156	36.5385	4	2	210000000	6	26.2821	3	2	38000000	3	9	1
Microtubule-actin cross-linking factor 1, isoforms 1/2/3/5 OS=Homo sapiens GN=MACF1 PE=1 SV=1	MACF1	H3BQK9	5.38	860.543	7592	0.289779	2	2	99000000	2	0.105374	1	1		1	3	1
Eukaryotic initiation factor 4A-I OS=Homo sapiens GN=EIF4A1 PE=1 SV=1	EIF4A1	J3QQP0	6.29	10.659	95	16.8421	1	0	830000000	8	16.8421	1	0	82000000	4	12	1
60S ribosomal protein L31 OS=Homo sapiens GN=RPL31 PE=1 SV=1	RPL31	B7Z4E3	10.65	13.947	120	42.5	5	5	490000000	8	30.8333	4	4	130000000	4	12	1
Ceruloplasmin OS=Homo sapiens GN=CP PE=1 SV=1	CP	P00450	5.72	122.128	1065	7.51174	8	8	170000000	14	6.47887	6	6	51000000	7	21	1
Nuclear ubiquitous casein and cyclin-dependent kinase substrate 1 OS=Homo sapiens GN=NUCKS1 PE=1 SV=1	NUCKS1	Q9H1E3	5.08	27.28	243	6.58436	2	2	31000000	2	3.7037	1	1	65000000	1	3	1
Arginine--tRNA ligase, cytoplasmic OS=Homo sapiens GN=RARS PE=1 SV=2	RARS	P54136	6.68	75.331	660	9.24242	4	4	23000000	4	3.78788	2	2	14000000	2	6	1
IK cytokine, down-regulator of HLA II, isoform CRA_a OS=Homo sapiens GN=IK PE=1 SV=1	IK	A0A087X1R5	6.86	65.614	557	7.54039	4	4	32000000	4	3.59066	2	2	38000000	2	6	1
Bromodomain-containing protein 3 OS=Homo sapiens GN=BRD3 PE=1 SV=1	BRD3	Q15059	9.36	79.492	726	3.58127	2	2	9500000	2	1.79063	1	1	7900000	1	3	1
Replication protein A 70 kDa DNA-binding subunit OS=Homo sapiens GN=RPA1 PE=1 SV=2	RPA1	P27694	7.21	68.095	616	4.38312	2	2	5800000	2	2.5974	1	1	3300000	1	3	1
Peroxiredoxin-5, mitochondrial OS=Homo sapiens GN=PRDX5 PE=1 SV=4	PRDX5	P30044	8.7	22.073	214	12.1495	2	2	10000000	2	3.73832	1	1	6800000	1	3	1
Chromosome alignment-maintaining phosphoprotein 1 OS=Homo sapiens GN=CHAMP1 PE=1 SV=2	CHAMP1	Q96JM3	8.44	89.043	812	2.83251	2	2	2300000	2	0.985222	1	1	1100000	1	3	1
Midkine OS=Homo sapiens GN=MDK PE=1 SV=1	MDK	E9PLM6	9.91	16.915	156	12.8205	2	2	17000000	4	12.8205	2	2	26000000	2	6	1
Actin-related protein 2/3 complex subunit 3 OS=Homo sapiens GN=ARPC3 PE=1 SV=3	ARPC3	O15145	8.59	20.533	178	12.3596	2	2	26000000	2	6.17978	1	1		1	3	1
Nucleolar protein 58 OS=Homo sapiens GN=NOP58 PE=1 SV=1	NOP58	F8WED0	5.41	7.931	68	14.7059	1	1	13000000	2	14.7059	1	1	22000000	1	3	1
Isoform 2 of Multifunctional protein ADE2 OS=Homo sapiens GN=PAICS	PAICS	P22234-2	7.69	47.928	432	11.5741	4	4	20000000	4	5.32407	2	2		2	6	1
Cell division control protein 42 homolog OS=Homo sapiens GN=CDC42 PE=1 SV=2	CDC42	P60953	6.55	21.245	191	11.5183	2	2	27000000	2	5.75916	1	1	9700000	1	3	1
WD repeat-containing protein 82 OS=Homo sapiens GN=WDR82 PE=1 SV=1	WDR82	Q6UXN9	7.69	35.056	313	13.099	3	3	18000000	4	8.30671	2	2	17000000	2	6	1
Cleavage and polyadenylation specificity factor subunit 1 OS=Homo sapiens GN=CPSF1 PE=1 SV=2	CPSF1	Q10570	6.4	160.782	1443	5.12821	5	5	21000000	6	2.1483	2	2		3	9	1
40S ribosomal protein S23 OS=Homo sapiens GN=RPS23 PE=1 SV=3	RPS23	P62266	10.49	15.798	143	30.0699	5	5	290000000	6	20.979	3	3	140000000	3	9	1
DNA-directed RNA polymerases I, II, and III subunit RPABC5 OS=Homo sapiens GN=POLR2L PE=1 SV=1	POLR2L	P62875	7.77	7.64	67	29.8507	2	2	15000000	2	13.4328	1	1	4700000	1	3	1
60S ribosomal protein L26 OS=Homo sapiens GN=RPL26 PE=1 SV=1	RPL26	P61254	10.55	17.248	145	43.4483	9	9	200000000	12	28.2759	5	5	39000000	6	18	1
40S ribosomal protein S28 OS=Homo sapiens GN=RPS28 PE=1 SV=1	RPS28	P62857	10.7	7.836	69	40.5797	5	5	230000000	6	36.2319	2	2	53000000	3	9	1
Pantetheinase OS=Homo sapiens GN=VNN1 PE=1 SV=2	VNN1	O95497	5.55	56.975	513	3.7037	1	1	82000000	2	3.7037	1	1	46000000	1	3	1
Cytochrome c oxidase subunit NDUFA4 OS=Homo sapiens GN=NDUFA4 PE=1 SV=1	NDUFA4	O00483	9.38	9.364	81	27.1605	2	2	23000000	2	14.8148	1	1	27000000	1	3	1
Profilin 2, isoform CRA_d OS=Homo sapiens GN=PFN2 PE=1 SV=1	PFN2	G5E9Q6	7.52	20.773	188	7.44681	1	1	66000000	2	7.44681	1	1	22000000	1	3	1
Pre-mRNA 3'-end-processing factor FIP1 OS=Homo sapiens GN=FIP1L1 PE=1 SV=1	FIP1L1	A0A0B4J203	4.96	94.645	849	3.18021	2	2	15000000	4	4.24028	2	2	5500000	2	6	1
14-3-3 protein theta OS=Homo sapiens GN=YWHAQ PE=1 SV=1	YWHAQ	P27348	4.78	27.747	245	60	17	12	680000000	31	49.7959	10	7	160000000	16	47	0.954196
Transcription activator BRG1 OS=Homo sapiens GN=SMARCA4 PE=1 SV=1	SMARCA4	A0A0A0MT49	8.12	188.742	1681	13.4444	19	19	110000000	27	9.39917	12	12	46000000	14	41	0.947533
Eukaryotic initiation factor 4A-III OS=Homo sapiens GN=EIF4A3 PE=1 SV=4	EIF4A3	P38919	6.73	46.841	411	57.4209	21	19	800000000	48	38.9294	14	13	140000000	25	73	0.941106
Isoform 4 of Alpha-actinin-1 OS=Homo sapiens GN=ACTN1	ACTN1	P12814-4	5.58	107.074	930	12.5806	10	6	75000000	17	8.92473	6	2	31000000	9	26	0.917538
Vimentin OS=Homo sapiens GN=VIM PE=1 SV=4	VIM	P08670	5.12	53.619	466	89.6996	63	61	8200000000	256	84.5494	43	40	1600000000	136	392	0.912537
Elongation factor 2 OS=Homo sapiens GN=EEF2 PE=1 SV=4	EEF2	P13639	6.83	95.277	858	42.5408	28	27	290000000	58	31.5851	19	18	180000000	31	89	0.903785
40S ribosomal protein S19 OS=Homo sapiens GN=RPS19 PE=1 SV=2	RPS19	P39019	10.32	16.051	145	55.8621	10	10	310000000	13	43.4483	6	6	87000000	7	20	0.893085
Thyroid hormone receptor-associated protein 3 OS=Homo sapiens GN=THRAP3 PE=1 SV=2	THRAP3	Q9Y2W1	10.15	108.601	955	19.4764	14	14	220000000	24	16.3351	11	11	110000000	13	37	0.884523
Alpha-centractin OS=Homo sapiens GN=ACTR1A PE=1 SV=1	ACTR1A	R4GMT0	5.66	37.41	332	37.3494	7	7	110000000	11	23.494	4	4	29000000	6	17	0.874469
Peroxiredoxin-2 OS=Homo sapiens GN=PRDX2 PE=1 SV=5	PRDX2	P32119	5.97	21.878	198	41.9192	7	6	320000000	9	31.8182	4	3	150000000	5	14	0.847997
Nuclear cap-binding protein subunit 1 OS=Homo sapiens GN=NCBP1 PE=1 SV=1	NCBP1	Q09161	6.43	91.781	790	13.1646	8	8	140000000	9	7.8481	5	5	73000000	5	14	0.847997
SWI/SNF-related matrix-associated actin-dependent regulator of chromatin subfamily D member 2 OS=Homo sapiens GN=SMARCD2 PE=1 SV=3	SMARCD2	Q92925	9.64	58.884	531	18.2674	7	6	22000000	9	11.2994	4	3	8400000	5	14	0.847997
Myosin light polypeptide 6 OS=Homo sapiens GN=MYL6 PE=1 SV=1	MYL6	J3KND3	4.65	17.047	152	38.8158	6	6	240000000	9	37.5	5	5	180000000	5	14	0.847997
Heterogeneous nuclear ribonucleoprotein U-like protein 1 OS=Homo sapiens GN=HNRNPUL1 PE=1 SV=2	HNRNPUL1	Q9BUJ2	6.92	95.679	856	18.4579	9	9	45000000	16	9.34579	6	5	110000000	9	25	0.830075
Myosin regulatory light chain 12A OS=Homo sapiens GN=MYL12A PE=1 SV=1	MYL12A	J3QRS3	4.75	20.444	177	33.8983	6	6	38000000	7	20.904	3	3	23000000	4	11	0.807355
Leucine--tRNA ligase, cytoplasmic OS=Homo sapiens GN=LARS PE=1 SV=2	LARS	Q9P2J5	7.3	134.379	1176	7.56803	7	7	43000000	7	4.42177	3	3	8900000	4	11	0.807355
Aspartate--tRNA ligase, cytoplasmic OS=Homo sapiens GN=DARS PE=1 SV=2	DARS	P14868	6.55	57.1	501	17.3653	7	7	53000000	7	9.38124	4	4	13000000	4	11	0.807355
Heat shock 70 kDa protein 4 OS=Homo sapiens GN=HSPA4 PE=1 SV=4	HSPA4	P34932	5.19	94.271	840	11.1905	6	4	84000000	7	4.88095	3	2	14000000	4	11	0.807355
Isoform 2 of Heat shock protein HSP 90-alpha OS=Homo sapiens GN=HSP90AA1	HSP90AA1	P07900-2	5.16	98.099	854	36.4169	29	17	960000000	54	25.0585	21	9	560000000	31	85	0.800691
T-complex protein 1 subunit zeta OS=Homo sapiens GN=CCT6A PE=1 SV=3	CCT6A	P40227	6.68	57.988	531	35.7815	13	13	330000000	19	17.8908	7	7	69000000	11	30	0.788496
14-3-3 protein zeta/delta OS=Homo sapiens GN=YWHAZ PE=1 SV=1	YWHAZ	B7Z2E6	4.41	13.977	125	60.8	8	5	240000000	12	23.2	3	2	55000000	7	19	0.777608
Peroxiredoxin-1 OS=Homo sapiens GN=PRDX1 PE=1 SV=1	PRDX1	A0A0A0MRQ5	8.72	10.67	97	73.1959	7	3	470000000	12	69.0722	6	3	230000000	7	19	0.777608
Isoform 2 of Cysteine-rich protein 2 OS=Homo sapiens GN=CRIP2	CRIP2	P52943-2	8.22	30.202	282	23.7589	3	3	120000000	5	12.4113	2	2	14000000	3	8	0.736966
Ubiquitin carboxyl-terminal hydrolase OS=Homo sapiens GN=UCHL1 PE=1 SV=1	UCHL1	D6R956	5.81	26.823	241	18.6722	3	3	51000000	5	20.7469	3	3	41000000	3	8	0.736966
60S ribosomal protein L35a OS=Homo sapiens GN=RPL35A PE=1 SV=2	RPL35A	P18077	11.06	12.53	110	32.7273	4	4	59000000	5	17.2727	2	2	53000000	3	8	0.736966
Serine/threonine-protein phosphatase PGAM5, mitochondrial OS=Homo sapiens GN=PGAM5 PE=1 SV=2	PGAM5	Q96HS1	8.68	31.985	289	18.6851	4	4	78000000	5	7.26644	2	2	45000000	3	8	0.736966
SNW domain-containing protein 1 OS=Homo sapiens GN=SNW1 PE=1 SV=1	SNW1	Q13573	9.52	61.456	536	11.3806	5	5	18000000	5	5.78358	3	3	20000000	3	8	0.736966
SWI/SNF-related matrix-associated actin-dependent regulator of chromatin subfamily D member 1 OS=Homo sapiens GN=SMARCD1 PE=1 SV=2	SMARCD1	Q96GM5	9.25	58.196	515	14.1748	4	3	28000000	5	6.21359	2	1	7400000	3	8	0.736966
40S ribosomal protein S4, X isoform OS=Homo sapiens GN=RPS4X PE=1 SV=2	RPS4X	P62701	10.15	29.579	263	58.5551	17	17	770000000	33	46.7681	12	12	300000000	20	53	0.722466
Tubulin alpha-1A chain OS=Homo sapiens GN=TUBA1A PE=1 SV=1	TUBA1A	Q71U36	5.06	50.104	451	65.4102	29	3	7800000000	183	64.745	24	3	3200000000	111	294	0.721284
Cell division cycle 5-like protein OS=Homo sapiens GN=CDC5L PE=1 SV=2	CDC5L	Q99459	8.18	92.194	802	22.0698	12	12	58000000	18	13.3416	8	8	53000000	11	29	0.710493
Bcl-2-associated transcription factor 1 OS=Homo sapiens GN=BCLAF1 PE=1 SV=2	BCLAF1	Q9NYF8	9.98	106.059	920	26.5217	19	19	330000000	26	15	10	10	210000000	16	42	0.70044
Isoform 2 of 40S ribosomal protein S20 OS=Homo sapiens GN=RPS20	RPS20	P60866-2	9.32	15.995	142	30.9859	6	6	440000000	13	25.3521	4	4	86000000	8	21	0.70044
Tubulin alpha-1B chain OS=Homo sapiens GN=TUBA1B PE=1 SV=1	TUBA1B	P68363	5.06	50.12	451	65.4102	28	2	7800000000	173	64.745	24	3	3200000000	107	280	0.693161
ATP-dependent RNA helicase DDX42 OS=Homo sapiens GN=DDX42 PE=1 SV=1	DDX42	A0A0A0MSJ0	7.01	77.766	708	11.0169	4	4	42000000	8	9.74576	4	4	19000000	5	13	0.678072
MKI67 FHA domain-interacting nucleolar phosphoprotein OS=Homo sapiens GN=NIFK PE=1 SV=1	NIFK	Q9BYG3	9.88	34.201	293	26.6212	5	5	18000000	8	18.7713	4	4	20000000	5	13	0.678072
60S ribosomal protein L13a (Fragment) OS=Homo sapiens GN=RPL13A PE=1 SV=2	RPL13A	M0QYS1	10.86	24.2	210	25.2381	7	7	130000000	8	17.619	4	4	40000000	5	13	0.678072
Isoform I of Protein SON OS=Homo sapiens GN=SON	SON	P18583-9	5.57	267.923	2466	5.15004	8	8	75000000	8	2.47364	4	4	61000000	5	13	0.678072
T-complex protein 1 subunit eta OS=Homo sapiens GN=CCT7 PE=1 SV=2	CCT7	Q99832	7.65	59.329	543	29.4659	11	11	130000000	19	19.8895	9	9	37000000	12	31	0.662965
Septin-9 OS=Homo sapiens GN=SEPT9 PE=1 SV=2	SEPT9	Q9UHD8	8.97	65.361	586	34.9829	14	14	77000000	19	19.2833	10	10	35000000	12	31	0.662965
Isoform 2 of Septin-2 OS=Homo sapiens GN=SEPT2	9/2/2015	Q15019-2	6.89	45.432	396	26.5152	6	6	55000000	11	9.59596	2	2	11000000	7	18	0.652077
Calmodulin OS=Homo sapiens GN=CALM2 PE=1 SV=1	CALM2	E7EMB3	4.56	21.675	196	41.8367	7	7	210000000	14	24.4898	4	4	61000000	9	23	0.63743
Serrate RNA effector molecule homolog OS=Homo sapiens GN=SRRT PE=1 SV=1	SRRT	Q9BXP5	5.96	100.604	876	16.4384	13	13	50000000	17	14.8402	10	10	35000000	11	28	0.628031
Actin-related protein 3 OS=Homo sapiens GN=ACTR3 PE=1 SV=3	ACTR3	P61158	5.88	47.341	418	51.4354	13	13	61000000	17	39.4737	9	9	100000000	11	28	0.628031
40S ribosomal protein S18 OS=Homo sapiens GN=RPS18 PE=1 SV=3	RPS18	P62269	10.99	17.708	152	49.3421	10	10	880000000	17	39.4737	7	7	240000000	11	28	0.628031
Filamin-A OS=Homo sapiens GN=FLNA PE=1 SV=4	FLNA	P21333	6.06	280.564	2647	13.6759	25	25	170000000	37	9.78466	19	19	85000000	24	61	0.624491
Junction plakoglobin OS=Homo sapiens GN=JUP PE=1 SV=3	JUP	P14923	6.14	81.693	745	30.0671	15	15	68000000	20	22.953	12	12	49000000	13	33	0.621488
Cell cycle and apoptosis regulator protein 2 OS=Homo sapiens GN=CCAR2 PE=1 SV=2	CCAR2	Q8N163	5.22	102.838	923	26.2189	17	17	160000000	20	18.8516	11	11	120000000	13	33	0.621488
ATP-dependent RNA helicase DDX39A OS=Homo sapiens GN=DDX39A PE=1 SV=2	DDX39A	O00148	5.68	49.098	427	35.363	12	2	340000000	26	32.0843	10	2	220000000	17	43	0.612977
Isoform 2 of Reticulocalbin-2 OS=Homo sapiens GN=RCN2	RCN2	Q14257-2	4.45	39.115	335	17.9104	3	3	15000000	3	13.1343	2	2	12000000	2	5	0.584963
Isoform 2 of Actin-related protein 2/3 complex subunit 4 OS=Homo sapiens GN=ARPC4	ARPC4	P59998-2	5.88	71.673	625	4.96	3	3	74000000	3	3.52	2	2	57000000	2	5	0.584963
EBNA1 binding protein 2, isoform CRA_d OS=Homo sapiens GN=EBNA1BP2 PE=1 SV=1	EBNA1BP2	H7C2Q8	9.98	40.659	361	9.14127	3	3	22000000	3	6.09418	2	2	22000000	2	5	0.584963
MICOS complex subunit MIC19 OS=Homo sapiens GN=CHCHD3 PE=1 SV=1	CHCHD3	F8WAR4	6.64	27.718	241	8.29876	3	3	3300000	3	8.29876	2	2	8900000	2	5	0.584963
Phosphate carrier protein, mitochondrial OS=Homo sapiens GN=SLC25A3 PE=1 SV=2	SLC25A3	Q00325	9.38	40.069	362	7.73481	2	2	320000000	3	5.52486	2	2	130000000	2	5	0.584963
Intron-binding protein aquarius OS=Homo sapiens GN=AQR PE=1 SV=4	AQR	O60306	6.37	171.186	1485	2.82828	3	3	13000000	3	1.75084	2	2	5600000	2	5	0.584963
Complement component C8 gamma chain OS=Homo sapiens GN=C8G PE=1 SV=3	C8G	P07360	8.31	22.264	202	8.91089	2	2	21000000	3	8.91089	2	2	18000000	2	5	0.584963
Replication protein A 14 kDa subunit OS=Homo sapiens GN=RPA3 PE=1 SV=1	RPA3	P35244	5.08	13.56	121	14.0496	1	1	35000000	3	29.7521	2	2	33000000	2	5	0.584963
Elongation factor 1-delta OS=Homo sapiens GN=EEF1D PE=1 SV=1	EEF1D	A0A087X1X7	7.21	69.24	631	7.76545	3	3	15000000	3	5.70523	2	2	6400000	2	5	0.584963
40S ribosomal protein S17-like OS=Homo sapiens GN=RPS17L PE=1 SV=1	RPS17L	P0CW22	9.85	15.54	135	44.4444	6	5	110000000	18	32.5926	4	4	47000000	12	30	0.584963
Cyclin-dependent kinase 6 OS=Homo sapiens GN=CDK6 PE=1 SV=1	CDK6	Q00534	6.46	36.915	326	26.6871	8	8	99000000	12	25.1534	7	6	75000000	8	20	0.584963
Serotransferrin OS=Homo sapiens GN=TF PE=1 SV=3	TF	P02787	7.12	77.014	698	3.29513	2	2	78000000	3	3.29513	2	2	100000000	2	5	0.584963
Eukaryotic translation initiation factor 2 subunit 1 OS=Homo sapiens GN=EIF2S1 PE=1 SV=3	EIF2S1	P05198	5.08	36.089	315	11.1111	3	3	68000000	3	7.93651	2	2	24000000	2	5	0.584963
Isoform Non-brain of Clathrin light chain A OS=Homo sapiens GN=CLTA	CLTA	P09496-2	4.53	23.647	218	21.5596	4	4	260000000	6	9.63303	1	1	25000000	4	10	0.584963
Zinc finger CCCH domain-containing protein 4 OS=Homo sapiens GN=ZC3H4 PE=1 SV=3	ZC3H4	Q9UPT8	6.27	140.169	1303	2.53262	2	2	14000000	3	2.53262	2	2	7400000	2	5	0.584963
High mobility group nucleosome-binding domain-containing protein 3 OS=Homo sapiens GN=HMGN3 PE=1 SV=1	HMGN3	A0A087WZE9	9.91	13.948	130	17.6923	2	2	190000000	3	18.4615	2	2	150000000	2	5	0.584963
Profilin-1 OS=Homo sapiens GN=PFN1 PE=1 SV=2	PFN1	P07737	8.27	15.045	140	59.2857	7	7	420000000	12	42.1429	5	5	200000000	8	20	0.584963
Capping protein (Actin filament) muscle Z-line, beta, isoform CRA_d OS=Homo sapiens GN=CAPZB PE=1 SV=1	CAPZB	B1AK88	6.43	33.76	301	14.6179	3	3	44000000	3	5.98007	2	2	24000000	2	5	0.584963
Sideroflexin-1 OS=Homo sapiens GN=SFXN1 PE=1 SV=4	SFXN1	Q9H9B4	9.07	35.596	322	9.62733	3	3	16000000	3	6.8323	2	2	20000000	2	5	0.584963
26S protease regulatory subunit 4 OS=Homo sapiens GN=PSMC1 PE=1 SV=1	PSMC1	P62191	6.21	49.154	440	6.36364	3	2	67000000	3	6.13636	2	2	7000000	2	5	0.584963
Nuclear cap-binding protein subunit 2 OS=Homo sapiens GN=NCBP2 PE=1 SV=1	NCBP2	P52298	8.21	17.99	156	18.5897	3	3	5200000	3	13.4615	2	2	5800000	2	5	0.584963
Isoform 2 of Calcium-binding mitochondrial carrier protein Aralar2 OS=Homo sapiens GN=SLC25A13	SLC25A13	Q9UJS0-2	8.62	74.257	676	7.39645	3	3	18000000	3	4.5858	2	2	8500000	2	5	0.584963
Asparagine--tRNA ligase, cytoplasmic OS=Homo sapiens GN=NARS PE=1 SV=1	NARS	O43776	6.25	62.903	548	7.84672	4	4	37000000	6	10.219	3	3	11000000	4	10	0.584963
Serine/arginine-rich splicing factor 4 OS=Homo sapiens GN=SRSF4 PE=1 SV=2	SRSF4	Q08170	11.52	56.645	494	12.5506	6	3	180000000	9	9.7166	5	2	160000000	6	15	0.584963
60S ribosomal protein L32 OS=Homo sapiens GN=RPL32 PE=1 SV=1	RPL32	F8W727	10.59	17.951	153	15.0327	2	2	170000000	3	8.49673	1	1	150000000	2	5	0.584963
TATA-binding protein-associated factor 2N OS=Homo sapiens GN=TAF15 PE=1 SV=1	TAF15	A0A075B7D9	5.08	48.809	449	15.8129	6	4	220000000	9	13.1403	4	3	120000000	6	15	0.584963
Serine/arginine-rich splicing factor 2 OS=Homo sapiens GN=SRSF2 PE=1 SV=4	SRSF2	Q01130	11.85	25.461	221	8.59729	2	2	88000000	3	8.59729	2	2	110000000	2	5	0.584963
U1 small nuclear ribonucleoprotein C OS=Homo sapiens GN=SNRPC PE=1 SV=1	SNRPC	A0A0A0MRR7	9.58	19.673	180	21.6667	3	3	120000000	3	11.6667	2	2	39000000	2	5	0.584963
Heat shock protein beta-1 OS=Homo sapiens GN=HSPB1 PE=1 SV=2	HSPB1	P04792	6.4	22.768	205	86.8293	12	12	640000000	19	78.5366	10	10	330000000	13	32	0.547488
Transcription factor 4 OS=Homo sapiens GN=TCF4 PE=1 SV=2	TCF4	E9PH57	7.47	83.374	773	14.489	6	6	40000000	13	11.7723	5	5	27000000	9	22	0.530515
Structural maintenance of chromosomes protein 1A OS=Homo sapiens GN=SMC1A PE=1 SV=2	SMC1A	Q14683	7.64	143.144	1233	8.51582	10	10	51000000	10	6.48824	7	7	18000000	7	17	0.514573
Heat shock protein HSP 90-beta OS=Homo sapiens GN=HSP90AB1 PE=1 SV=4	HSP90AB1	P08238	5.03	83.212	724	51.5193	33	20	960000000	67	41.0221	28	14	600000000	47	114	0.5115
Tubulin beta-2B chain OS=Homo sapiens GN=TUBB2B PE=1 SV=1	TUBB2B	Q9BVA1	4.89	49.921	445	74.1573	27	2	5100000000	139	55.5056	22	3	2200000000	98	237	0.504231
Alpha-actinin-4 OS=Homo sapiens GN=ACTN4 PE=1 SV=2	ACTN4	O43707	5.44	104.788	911	20.5269	14	10	120000000	24	17.7827	13	9	91000000	17	41	0.4975
Tubulin beta-2A chain OS=Homo sapiens GN=TUBB2A PE=1 SV=1	TUBB2A	Q13885	4.89	49.875	445	73.2584	26	1	5100000000	138	55.5056	22	3	2200000000	98	236	0.493815
40S ribosomal protein S16 OS=Homo sapiens GN=RPS16 PE=1 SV=2	RPS16	P62249	10.21	16.435	146	56.8493	9	9	910000000	14	43.8356	7	7	220000000	10	24	0.485427
Isoform 2 of Synaptopodin-2 OS=Homo sapiens GN=SYNPO2	SYNPO2	Q9UMS6-2	8.79	136.258	1261	12.7676	11	11	77000000	14	10.9437	9	9	46000000	10	24	0.485427
Chromobox protein homolog 3 OS=Homo sapiens GN=CBX3 PE=1 SV=4	CBX3	Q13185	5.33	20.798	183	33.8798	5	4	150000000	7	20.765	3	3	92000000	5	12	0.485427
60S ribosomal protein L34 OS=Homo sapiens GN=RPL34 PE=1 SV=3	RPL34	P49207	11.47	13.284	117	29.9145	6	6	180000000	7	30.7692	5	5	140000000	5	12	0.485427
5'-3' exoribonuclease 2 OS=Homo sapiens GN=XRN2 PE=1 SV=1	XRN2	Q9H0D6	7.47	108.513	950	10.1053	7	7	32000000	7	6.10526	5	5	32000000	5	12	0.485427
WD40 repeat-containing protein SMU1 OS=Homo sapiens GN=SMU1 PE=1 SV=2	SMU1	Q2TAY7	7.18	57.507	513	16.3743	7	7	75000000	14	15.9844	8	8	48000000	10	24	0.485427
Splicing factor 3A subunit 3 OS=Homo sapiens GN=SF3A3 PE=1 SV=1	SF3A3	Q12874	5.38	58.812	501	23.7525	8	8	110000000	14	24.1517	8	8	93000000	10	24	0.485427
Elongation factor 1-alpha 2 OS=Homo sapiens GN=EEF1A2 PE=1 SV=1	EEF1A2	Q05639	9.03	50.438	463	36.0691	11	4	1200000000	22	25.486	10	3	890000000	16	38	0.459432
Heterogeneous nuclear ribonucleoprotein U-like protein 2 OS=Homo sapiens GN=HNRNPUL2 PE=1 SV=1	HNRNPUL2	Q1KMD3	4.91	85.052	747	25.0335	18	18	100000000	33	27.0415	17	17	160000000	24	57	0.459432
Pinin OS=Homo sapiens GN=PNN PE=1 SV=4	PNN	Q9H307	7.14	81.565	717	20.6416	12	12	83000000	15	15.8996	8	8	66000000	11	26	0.447459
Heterogeneous nuclear ribonucleoprotein Q OS=Homo sapiens GN=SYNCRIP PE=1 SV=2	SYNCRIP	O60506	8.59	69.56	623	39.1653	24	15	850000000	34	31.6212	17	9	390000000	25	59	0.443607
Far upstream element-binding protein 2 OS=Homo sapiens GN=KHSRP PE=1 SV=1	KHSRP	A0A087WTP3	7.71	72.982	711	40.9283	26	23	310000000	38	37.1308	22	20	230000000	28	66	0.440573
Apoptotic chromatin condensation inducer in the nucleus OS=Homo sapiens GN=ACIN1 PE=1 SV=2	ACIN1	E7EQT4	6.73	147.275	1301	15.5265	15	15	67000000	23	10.3766	10	10	39000000	17	40	0.436099
Tubulin beta chain OS=Homo sapiens GN=TUBB PE=1 SV=2	TUBB	P07437	4.89	49.639	444	74.3243	28	6	5600000000	170	71.6216	26	5	2300000000	126	296	0.432111
U1 small nuclear ribonucleoprotein 70 kDa OS=Homo sapiens GN=SNRNP70 PE=1 SV=2	SNRNP70	P08621	9.94	51.526	437	15.5606	6	6	70000000	8	13.5011	5	5	43000000	6	14	0.415037
Cysteine and glycine-rich protein 2 OS=Homo sapiens GN=CSRP2 PE=1 SV=1	CSRP2	F8VQR7	8.41	20.664	187	17.6471	3	3	29000000	4	12.2995	2	2	13000000	3	7	0.415037
Fascin OS=Homo sapiens GN=FSCN1 PE=1 SV=3	FSCN1	Q16658	7.24	54.496	493	24.1379	10	10	120000000	12	21.0953	8	8	64000000	9	21	0.415037
Synaptic vesicle membrane protein VAT-1 homolog OS=Homo sapiens GN=VAT1 PE=1 SV=2	VAT1	Q99536	6.29	41.893	393	3.56234	1	1	17000000	8	3.56234	1	1		6	14	0.415037
Ubiquitin-60S ribosomal protein L40 OS=Homo sapiens GN=UBA52 PE=1 SV=2	UBA52	P62987	9.83	14.719	128	28.125	4	2	32000000	4	15.625	3	2	33000000	3	7	0.415037
Cytochrome c oxidase subunit 2 OS=Homo sapiens GN=MT-CO2 PE=1 SV=1	MT-CO2	P00403	4.82	25.548	227	16.2996	3	3	67000000	4	13.2159	2	2	76000000	3	7	0.415037
Chimera CSNK2B-LY6G5B splicing isoform 991 OS=Homo sapiens GN=CSNK2B-LY6G5B--991 PE=2 SV=1	CSNK2B-LY6G5B--991	N0E472	4.64	34.783	304	13.4868	3	3	31000000	4	3.61842	1	1	29000000	3	7	0.415037
Isoform HMG-R of High mobility group protein HMG-I/HMG-Y OS=Homo sapiens GN=HMGA1	HMGA1	P17096-3	11.75	19.682	179	20.1117	5	2	160000000	8	20.1117	4	2	170000000	6	14	0.415037
Nucleolar complex protein 2 homolog OS=Homo sapiens GN=NOC2L PE=1 SV=4	NOC2L	Q9Y3T9	5.62	84.866	749	5.34045	3	3	19000000	4	4.40587	3	3	42000000	3	7	0.415037
Isoform 2 of Elongation factor 1-gamma OS=Homo sapiens GN=EEF1G	EEF1G	P26641-2	7.72	56.114	487	7.59754	2	2	71000000	4	6.98152	3	3	10000000	3	7	0.415037
Isoform 3 of Pyrroline-5-carboxylate reductase 1, mitochondrial OS=Homo sapiens GN=PYCR1	PYCR1	P32322-3	7.61	35.958	346	8.95954	2	2	45000000	4	8.95954	2	2	33000000	3	7	0.415037
Heterogeneous nuclear ribonucleoprotein F OS=Homo sapiens GN=HNRNPF PE=1 SV=3	HNRNPF	P52597	5.58	45.643	415	46.747	10	8	740000000	24	34.9398	9	7	570000000	18	42	0.415037
Isoform 2 of Heterogeneous nuclear ribonucleoprotein D0 OS=Homo sapiens GN=HNRNPD	HNRNPD	Q14103-2	8.1	36.249	336	36.3095	13	1	810000000	24	36.3095	12	1	660000000	18	42	0.415037
PHD finger-like domain-containing protein 5A OS=Homo sapiens GN=PHF5A PE=1 SV=1	PHF5A	Q7RTV0	8.41	12.397	110	40	4	4	21000000	4	32.7273	3	3	28000000	3	7	0.415037
Isoform 4 of Polypyrimidine tract-binding protein 3 OS=Homo sapiens GN=PTBP3	PTBP3	O95758-4	9.19	60.379	558	6.81004	3	2	100000000	4	3.22581	2	2	140000000	3	7	0.415037
SWI/SNF related, matrix associated, actin dependent regulator of chromatin, subfamily b, member 1, isoform CRA_c OS=Homo sapiens GN=SMARCB1 PE=1 SV=1	SMARCB1	G5E975	5.76	45.022	394	12.4365	3	3	66000000	4	8.88325	3	3	76000000	3	7	0.415037
Serine/arginine-rich splicing factor 5 OS=Homo sapiens GN=SRSF5 PE=1 SV=1	SRSF5	Q13243	11.59	31.245	272	11.0294	3	2	150000000	4	8.45588	2	1	190000000	3	7	0.415037
Protein IGKV2D-29 (Fragment) OS=Homo sapiens GN=IGKV2D-29 PE=1 SV=1	IGKV2D-29	A0A075B6S2	7.12	13.135	120	16.6667	2	2	8400000000	8	16.6667	2	2	6000000000	6	14	0.415037
Multifunctional protein ADE2 OS=Homo sapiens GN=PAICS PE=1 SV=3	PAICS	P22234	7.23	47.049	425	11.7647	4	4	20000000	4	8.94118	3	3	8300000	3	7	0.415037
40S ribosomal protein S8 OS=Homo sapiens GN=RPS8 PE=1 SV=2	RPS8	P62241	10.32	24.19	208	52.8846	12	12	650000000	20	51.4423	10	10	150000000	15	35	0.415037
60S acidic ribosomal protein P0 OS=Homo sapiens GN=RPLP0 PE=1 SV=1	RPLP0	F8VRK7	9.5	17.43	156	45.5128	5	5	310000000	8	45.5128	6	6	200000000	6	14	0.415037
Matrin-3 OS=Homo sapiens GN=MATR3 PE=1 SV=1	MATR3	B3KM87	5.86	56.701	509	30.6483	12	12	290000000	33	22.7898	11	11	420000000	25	58	0.400538
Elongation factor 1-alpha 1 OS=Homo sapiens GN=EEF1A1 PE=1 SV=1	EEF1A1	P68104	9.01	50.109	462	48.4848	15	8	1900000000	46	38.7446	15	8	1200000000	35	81	0.394279
40S ribosomal protein S11 OS=Homo sapiens GN=RPS11 PE=1 SV=3	RPS11	P62280	10.3	18.419	158	46.8354	10	10	400000000	17	41.7722	7	7	170000000	13	30	0.387023
U5 small nuclear ribonucleoprotein 200 kDa helicase OS=Homo sapiens GN=SNRNP200 PE=1 SV=2	SNRNP200	O75643	6.06	244.353	2136	32.0225	48	48	150000000	85	28.0899	41	41	110000000	65	150	0.387023
ATP-citrate synthase OS=Homo sapiens GN=ACLY PE=1 SV=3	ACLY	P53396	7.33	120.762	1101	12.9882	11	11	62000000	13	11.1717	10	10	36000000	10	23	0.378512
Isoform 2 of Tropomyosin alpha-3 chain OS=Homo sapiens GN=TPM3	TPM3	P06753-2	4.78	29.015	248	43.5484	16	9	190000000	26	48.3871	16	7	94000000	20	46	0.378512
Isoform 2 of Spliceosome RNA helicase DDX39B OS=Homo sapiens GN=DDX39B	DDX39B	Q13838-2	5.88	50.647	443	44.2438	15	5	340000000	31	39.0519	13	5	220000000	24	55	0.369234
Malate dehydrogenase, mitochondrial OS=Homo sapiens GN=MDH2 PE=1 SV=3	MDH2	P40926	8.68	35.481	338	31.3609	8	8	37000000	9	29.5858	7	7	63000000	7	16	0.36257
Fibulin-1 OS=Homo sapiens GN=FBLN1 PE=1 SV=4	FBLN1	P23142	5.22	77.162	703	10.2418	7	1	300000000	9	9.24609	6	1	180000000	7	16	0.36257
NHP2-like protein 1 OS=Homo sapiens GN=NHP2L1 PE=1 SV=1	NHP2L1	B1AHD1	8.46	14.618	132	58.3333	6	6	170000000	9	58.3333	6	6	200000000	7	16	0.36257
UPF0568 protein C14orf166 OS=Homo sapiens GN=C14orf166 PE=1 SV=1	C14orf166	G3V4C6	6.9	22.689	193	33.6788	5	5	130000000	9	15.544	2	2	12000000	7	16	0.36257
Ran-specific GTPase-activating protein OS=Homo sapiens GN=RANBP1 PE=1 SV=1	RANBP1	F6WQW2	8.75	31.884	278	27.3381	5	5	48000000	9	23.741	5	5	25000000	7	16	0.36257
Cellular nucleic acid-binding protein OS=Homo sapiens GN=CNBP PE=1 SV=1	CNBP	P62633	7.71	19.45	177	38.9831	5	5	120000000	9	34.4633	5	5	25000000	7	16	0.36257
Serum albumin OS=Homo sapiens GN=ALB PE=1 SV=2	ALB	P02768	6.28	69.321	609	11.8227	8	8	48000000000	87	10.6732	7	7	34000000000	68	155	0.355481
Myosin-9 OS=Homo sapiens GN=MYH9 PE=1 SV=4	MYH9	P35579	5.6	226.392	1960	21.5306	32	23	160000000	46	16.6837	24	17	130000000	36	82	0.353637
Tubulin beta-4B chain OS=Homo sapiens GN=TUBB4B PE=1 SV=1	TUBB4B	P68371	4.89	49.799	445	67.191	25	1	4600000000	139	65.3933	25	2	1800000000	110	249	0.337581
Tubulin beta-4A chain OS=Homo sapiens GN=TUBB4A PE=1 SV=2	TUBB4A	P04350	4.88	49.554	444	63.7387	22	3	4600000000	124	56.0811	20	1	1800000000	99	223	0.32484
Isoform 2 of Cleavage and polyadenylation specificity factor subunit 6 OS=Homo sapiens GN=CPSF6	CPSF6	Q16630-2	7.71	63.432	588	18.5374	7	7	110000000	10	16.1565	6	6	110000000	8	18	0.321928
Apoptosis inhibitor 5 OS=Homo sapiens GN=API5 PE=1 SV=3	API5	Q9BZZ5	7.34	58.968	524	8.96947	3	3	36000000	5	6.48855	2	2	20000000	4	9	0.321928
F-actin-capping protein subunit alpha-1 OS=Homo sapiens GN=CAPZA1 PE=1 SV=3	CAPZA1	P52907	5.69	32.902	286	20.979	4	3	77000000	5	16.7832	4	4	42000000	4	9	0.321928
ATP synthase subunit O, mitochondrial OS=Homo sapiens GN=ATP5O PE=1 SV=1	ATP5O	P48047	9.96	23.263	213	27.6995	4	4	35000000	5	26.2911	4	4	29000000	4	9	0.321928
Isoform 2 of Nucleosome assembly protein 1-like 4 OS=Homo sapiens GN=NAP1L4	NAP1L4	Q99733-2	4.7	44.051	386	12.4352	4	3	20000000	5	11.9171	4	3	9200000	4	9	0.321928
U2 snRNP-associated SURP motif-containing protein OS=Homo sapiens GN=U2SURP PE=1 SV=2	U2SURP	O15042	8.47	118.219	1029	5.53936	5	5	28000000	5	2.52672	2	2	25000000	4	9	0.321928
Leucine-rich PPR motif-containing protein, mitochondrial OS=Homo sapiens GN=LRPPRC PE=1 SV=3	LRPPRC	P42704	6.13	157.805	1394	6.81492	6	6	26000000	10	6.74319	8	8	36000000	8	18	0.321928
Transducin beta-like protein 2 OS=Homo sapiens GN=TBL2 PE=1 SV=1	TBL2	E9PF19	9.48	45.906	411	11.9221	3	3	21000000	5	9.00243	2	2	11000000	4	9	0.321928
Aspartate aminotransferase, cytoplasmic OS=Homo sapiens GN=GOT1 PE=1 SV=3	GOT1	P17174	7.01	46.219	413	14.2857	4	4	55000000	5	12.1065	3	3	50000000	4	9	0.321928
D-3-phosphoglycerate dehydrogenase OS=Homo sapiens GN=PHGDH PE=1 SV=4	PHGDH	O43175	6.71	56.614	533	11.6323	5	5	54000000	5	10.3189	4	4	23000000	4	9	0.321928
U4/U6.U5 tri-snRNP-associated protein 2 OS=Homo sapiens GN=USP39 PE=1 SV=2	USP39	Q53GS9	8.91	65.34	565	10.0885	5	5	16000000	5	8.67257	4	4	23000000	4	9	0.321928
Isoform 2 of Regulator of chromosome condensation OS=Homo sapiens GN=RCC1	RCC1	P18754-2	8.16	48.115	452	15.9292	5	5	26000000	5	14.1593	4	4	21000000	4	9	0.321928
Eukaryotic translation initiation factor 2 subunit 3 OS=Homo sapiens GN=EIF2S3 PE=1 SV=3	EIF2S3	P41091	8.4	51.077	472	27.3305	9	9	69000000	10	16.3136	5	5	28000000	8	18	0.321928
Splicing factor 3B subunit 1 OS=Homo sapiens GN=SF3B1 PE=1 SV=3	SF3B1	O75533	7.09	145.738	1304	30.8282	29	29	160000000	45	26.6871	22	22	140000000	36	81	0.321928
Eukaryotic translation initiation factor 5A-1 OS=Homo sapiens GN=EIF5A PE=1 SV=1	EIF5A	I3L504	5.25	20.49	186	39.2473	5	5	94000000	5	17.2043	3	3	53000000	4	9	0.321928
40S ribosomal protein S6 OS=Homo sapiens GN=RPS6 PE=1 SV=1	RPS6	A2A3R7	5.48	10.408	91	39.5604	4	4	330000000	5	30.7692	3	3	120000000	4	9	0.321928
Probable ATP-dependent RNA helicase DDX17 OS=Homo sapiens GN=DDX17 PE=1 SV=1	DDX17	H3BLZ8	8.37	80.389	731	37.4829	21	15	670000000	31	33.7893	18	12	560000000	25	56	0.31034
Serine/arginine repetitive matrix protein 2 OS=Homo sapiens GN=SRRM2 PE=1 SV=2	SRRM2	Q9UQ35	12.06	299.438	2752	17.3692	31	31	120000000	42	14.7166	26	26	110000000	34	76	0.304855
Heterogeneous nuclear ribonucleoprotein D0 OS=Homo sapiens GN=HNRNPD PE=1 SV=1	HNRNPD	Q14103	7.81	38.41	355	39.7183	14	2	810000000	27	39.7183	15	4	660000000	22	49	0.295456
MICOS complex subunit MIC60 OS=Homo sapiens GN=IMMT PE=1 SV=1	IMMT	Q16891	6.48	83.626	758	13.0607	8	8	43000000	11	11.2137	7	7	41000000	9	20	0.289507
RNA-binding protein 25 OS=Homo sapiens GN=RBM25 PE=1 SV=3	RBM25	P49756	6.32	100.124	843	14.2349	8	8	100000000	11	10.4389	6	6	61000000	9	20	0.289507
60S ribosomal protein L27a OS=Homo sapiens GN=RPL27A PE=1 SV=2	RPL27A	P46776	11	16.551	148	37.1622	7	7	290000000	11	35.8108	7	7	210000000	9	20	0.289507
TAR DNA-binding protein 43 OS=Homo sapiens GN=TARDBP PE=1 SV=1	TARDBP	Q13148	6.19	44.711	414	26.8116	7	7	160000000	11	24.8792	6	6	120000000	9	20	0.289507
Tubulin alpha chain-like 3 OS=Homo sapiens GN=TUBAL3 PE=1 SV=2	TUBAL3	A6NHL2	6.05	49.877	446	6.50224	4	0	560000000	11	10.3139	4	1	190000000	9	20	0.289507
Core histone macro-H2A.2 OS=Homo sapiens GN=H2AFY2 PE=1 SV=3	H2AFY2	Q9P0M6	9.69	40.033	372	58.6022	14	13	230000000	44	55.6452	15	14	260000000	36	80	0.289507
Uncharacterized protein OS=Homo sapiens PE=4 SV=1	NOGENE	F8W810	7.85	50.498	466	15.8798	5	5	66000000	6	10.515	3	3	26000000	5	11	0.263034
U4/U6 small nuclear ribonucleoprotein Prp31 OS=Homo sapiens GN=PRPF31 PE=1 SV=2	PRPF31	Q8WWY3	5.78	55.421	499	11.022	5	5	34000000	6	9.41884	4	4	22000000	5	11	0.263034
40S ribosomal protein S5 OS=Homo sapiens GN=RPS5 PE=1 SV=1	RPS5	M0QZN2	8.48	14.754	134	29.1045	4	4	670000000	6	20.8955	2	2	300000000	5	11	0.263034
60S ribosomal protein L24 OS=Homo sapiens GN=RPL24 PE=1 SV=1	RPL24	C9JNW5	10.78	17.532	150	25.3333	4	4	430000000	6	26	4	4	180000000	5	11	0.263034
Pre-mRNA-processing factor 19 OS=Homo sapiens GN=PRPF19 PE=1 SV=1	PRPF19	Q9UMS4	6.61	55.146	504	40.0794	11	11	130000000	30	36.3095	11	11	100000000	25	55	0.263034
40S ribosomal protein S15a OS=Homo sapiens GN=RPS15A PE=1 SV=2	RPS15A	P62244	10.13	14.83	130	36.1538	5	5	290000000	6	36.1538	5	5	130000000	5	11	0.263034
HCG2001850, isoform CRA_a OS=Homo sapiens GN=NME1-NME2 PE=1 SV=1	NME1-NME2	Q32Q12	8.48	32.621	292	41.7808	7	2	440000000	12	31.5068	4	4	310000000	10	22	0.263034
Phosphoglycerate kinase 1 OS=Homo sapiens GN=PGK1 PE=1 SV=3	PGK1	P00558	8.1	44.586	417	17.0264	5	5	72000000	6	11.9904	4	4	48000000	5	11	0.263034
Heterogeneous nuclear ribonucleoprotein H OS=Homo sapiens GN=HNRNPH1 PE=1 SV=1	HNRNPH1	D6R9D3	4.44	4.347	40	72.5	3	3	380000000	6	72.5	3	3	250000000	5	11	0.263034
Guanine nucleotide-binding protein G(s) subunit alpha isoforms XLas OS=Homo sapiens GN=GNAS PE=1 SV=2	GNAS	Q5JWF2	5.03	110.956	1037	6.75024	5	5	26000000	6	4.43587	4	3	51000000	5	11	0.263034
Metastasis-associated protein MTA2 OS=Homo sapiens GN=MTA2 PE=1 SV=1	MTA2	O94776	9.66	74.976	668	9.43114	4	3	30000000	6	8.53293	4	2	120000000	5	11	0.263034
Splicing factor 3B subunit 2 OS=Homo sapiens GN=SF3B2 PE=1 SV=2	SF3B2	Q13435	5.67	100.165	895	25.8101	18	18	110000000	30	23.9106	15	15	72000000	25	55	0.263034
Isoform 2 of Myb-binding protein 1A OS=Homo sapiens GN=MYBBP1A	MYBBP1A	Q9BQG0-2	9.28	149.274	1332	16.2162	16	16	35000000	25	15.3153	15	15	40000000	21	46	0.251539
Histone H2A type 2-B OS=Homo sapiens GN=HIST2H2AB PE=1 SV=3	HIST2H2AB	Q8IUE6	10.89	13.987	130	70	8	2	22000000000	44	73.0769	8	2	23000000000	37	81	0.249978
Tubulin beta-3 chain OS=Homo sapiens GN=TUBB3 PE=1 SV=2	TUBB3	Q13509	4.93	50.4	450	64.8889	23	8	4200000000	91	60.6667	22	8	1800000000	77	168	0.241008
Heterogeneous nuclear ribonucleoprotein D-like OS=Homo sapiens GN=HNRNPDL PE=1 SV=3	HNRNPDL	O14979	9.57	46.409	420	18.5714	9	7	760000000	13	14.5238	7	6	550000000	11	24	0.241008
Nucleolin OS=Homo sapiens GN=NCL PE=1 SV=3	NCL	P19338	4.7	76.568	710	33.3803	22	22	190000000	33	33.8028	24	24	290000000	28	61	0.237039
Interleukin enhancer-binding factor 3 OS=Homo sapiens GN=ILF3 PE=1 SV=3	ILF3	Q12906	8.76	95.279	894	47.0917	31	1	400000000	56	44.7427	35	1	300000000	48	104	0.222392
Serine/arginine-rich splicing factor 11 OS=Homo sapiens GN=SRSF11 PE=1 SV=1	SRSF11	Q05519	10.52	53.51	484	13.6364	4	4	49000000	7	13.6364	4	4	83000000	6	13	0.222392
60S ribosomal protein L14 OS=Homo sapiens GN=RPL14 PE=1 SV=4	RPL14	P50914	10.93	23.417	215	20.9302	4	4	500000000	7	20.9302	4	4	390000000	6	13	0.222392
60S ribosomal protein L35 OS=Homo sapiens GN=RPL35 PE=1 SV=2	RPL35	P42766	11.05	14.543	123	34.1463	4	4	150000000	7	26.8293	4	4	82000000	6	13	0.222392
Isoform 2 of Heterogeneous nuclear ribonucleoprotein K OS=Homo sapiens GN=HNRNPK	HNRNPK	P61978-2	5.33	50.996	464	60.9914	25	2	1800000000	68	61.2069	26	2	1400000000	59	127	0.20482
Far upstream element-binding protein 1 OS=Homo sapiens GN=FUBP1 PE=1 SV=3	FUBP1	Q96AE4	7.61	67.518	644	35.8696	19	14	340000000	31	32.2981	16	13	230000000	27	58	0.199309
Isoform 3 of Heterogeneous nuclear ribonucleoprotein K OS=Homo sapiens GN=HNRNPK	HNRNPK	P61978-3	5.54	48.532	440	58.8636	24	1	1800000000	63	59.0909	26	2	1400000000	55	118	0.19592
Histone H1x OS=Homo sapiens GN=H1FX PE=1 SV=1	H1FX	Q92522	10.76	22.474	213	41.3146	12	12	250000000	16	40.8451	10	10	150000000	14	30	0.192645
Fibulin-1 OS=Homo sapiens GN=FBLN1 PE=1 SV=1	FBLN1	B1AHL2	5.39	78.277	721	9.70874	7	1	300000000	8	8.73786	6	1	190000000	7	15	0.192645
Serine/arginine-rich splicing factor 6 OS=Homo sapiens GN=SRSF6 PE=1 SV=2	SRSF6	Q13247	11.43	39.563	344	15.1163	6	3	190000000	8	16.5698	6	3	160000000	7	15	0.192645
Unconventional myosin-Ib OS=Homo sapiens GN=MYO1B PE=1 SV=3	MYO1B	O43795	9.38	131.902	1136	8.97887	7	7	24000000	8	6.95423	6	6	14000000	7	15	0.192645
Centromere protein V OS=Homo sapiens GN=CENPV PE=1 SV=1	CENPV	Q7Z7K6	9.73	29.927	275	29.8182	5	1	90000000	8	24.3636	5	5	80000000	7	15	0.192645
Caldesmon OS=Homo sapiens GN=CALD1 PE=1 SV=3	CALD1	Q05682	5.66	93.175	793	10.4666	7	7	37000000	8	9.45776	6	6	23000000	7	15	0.192645
Dihydropyrimidinase-related protein 2 OS=Homo sapiens GN=DPYSL2 PE=1 SV=1	DPYSL2	Q16555	6.38	62.255	572	34.2657	13	10	160000000	16	27.4476	10	9	25000000	14	30	0.192645
Isoform 7 of Interleukin enhancer-binding factor 3 OS=Homo sapiens GN=ILF3	ILF3	Q12906-7	8.81	95.748	898	47.3274	32	2	400000000	57	44.9889	36	2	300000000	50	107	0.189034
Heterogeneous nuclear ribonucleoprotein L OS=Homo sapiens GN=HNRNPL PE=1 SV=2	HNRNPL	P14866	8.22	64.092	589	62.309	23	23	930000000	72	55.1783	21	20	810000000	64	136	0.169925
Histone H3.1 OS=Homo sapiens GN=HIST1H3A PE=1 SV=2	HIST1H3A	P68431	11.12	15.394	136	50	6	1	10000000000	28	43.3824	4	1	2100000000	25	53	0.163499
Isoform 2 of Heterogeneous nuclear ribonucleoprotein A/B OS=Homo sapiens GN=HNRNPAB	HNRNPAB	Q99729-2	6.95	35.945	332	28.6145	10	9	880000000	19	28.012	10	10	640000000	17	36	0.160465
Isoform 4 of Double-stranded RNA-specific adenosine deaminase OS=Homo sapiens GN=ADAR	ADAR	P55265-4	8.56	140.749	1269	20.9614	23	23	140000000	30	19.6217	21	21	84000000	27	57	0.152003
Heat shock cognate 71 kDa protein OS=Homo sapiens GN=HSPA8 PE=1 SV=1	HSPA8	P11142	5.52	70.854	646	40.7121	23	19	610000000	40	33.7461	19	14	270000000	36	76	0.152003
Peptidyl-prolyl cis-trans isomerase A OS=Homo sapiens GN=PPIA PE=1 SV=2	PPIA	P62937	7.81	18.001	165	53.3333	8	8	1800000000	52	49.0909	7	7	820000000	47	99	0.145851
Transcription intermediary factor 1-beta OS=Homo sapiens GN=TRIM28 PE=1 SV=5	TRIM28	Q13263	5.77	88.493	835	37.485	18	18	150000000	32	31.7365	16	16	120000000	29	61	0.142019
SWI/SNF-related matrix-associated actin-dependent regulator of chromatin subfamily A member 5 OS=Homo sapiens GN=SMARCA5 PE=1 SV=1	SMARCA5	O60264	8.09	121.828	1052	9.98099	10	10	67000000	11	10.9316	10	5	66000000	10	21	0.137504
60S ribosomal protein L7a OS=Homo sapiens GN=RPL7A PE=1 SV=2	RPL7A	P62424	10.61	29.977	266	50.3759	19	19	420000000	34	50.3759	19	19	330000000	31	65	0.133267
Transformer-2 protein homolog beta OS=Homo sapiens GN=TRA2B PE=1 SV=1	TRA2B	P62995	11.25	33.646	288	18.4028	4	3	45000000	12	22.9167	4	3	41000000	11	23	0.125531
78 kDa glucose-regulated protein OS=Homo sapiens GN=HSPA5 PE=1 SV=2	HSPA5	P11021	5.16	72.288	654	31.4985	17	15	360000000	25	33.1804	19	17	190000000	23	48	0.120294
60S ribosomal protein L4 OS=Homo sapiens GN=RPL4 PE=1 SV=5	RPL4	P36578	11.06	47.667	427	45.1991	19	19	410000000	25	44.0281	18	18	290000000	23	48	0.120294
60S ribosomal protein L12 OS=Homo sapiens GN=RPL12 PE=1 SV=1	RPL12	P30050	9.42	17.808	165	59.3939	8	8	520000000	13	33.3333	4	4	280000000	12	25	0.115477
rRNA 2'-O-methyltransferase fibrillarin OS=Homo sapiens GN=FBL PE=1 SV=2	FBL	P22087	10.18	33.763	321	42.3676	9	9	260000000	13	43.3022	10	10	190000000	12	25	0.115477
Non-POU domain-containing octamer-binding protein OS=Homo sapiens GN=NONO PE=1 SV=4	NONO	Q15233	8.95	54.197	471	50.9554	22	21	760000000	39	41.4013	17	16	760000000	36	75	0.115477
60S ribosomal protein L10 OS=Homo sapiens GN=RPL10 PE=1 SV=4	RPL10	P27635	10.08	24.588	214	32.7103	7	7	300000000	13	35.0467	7	7	150000000	12	25	0.115477
Nucleophosmin OS=Homo sapiens GN=NPM1 PE=1 SV=2	NPM1	P06748	4.78	32.555	294	50.6803	12	12	1600000000	54	51.0204	14	14	1300000000	50	104	0.111031
Keratinocyte proline-rich protein OS=Homo sapiens GN=KPRP PE=1 SV=1	KPRP	Q5T749	8.27	64.093	579	19.5164	7	7	130000000	15	21.4162	9	9	95000000	14	29	0.0995357
RNA-binding protein 14 OS=Homo sapiens GN=RBM14 PE=1 SV=2	RBM14	Q96PK6	9.67	69.449	669	23.0194	12	12	110000000	15	19.432	11	11	140000000	14	29	0.0995357
Keratin, type II cytoskeletal 3 OS=Homo sapiens GN=KRT3 PE=1 SV=3	KRT3	P12035	6.48	64.378	628	12.2611	8	6	370000000	15	12.1019	9	1	450000000	14	29	0.0995357
Alpha-2-macroglobulin OS=Homo sapiens GN=A2M PE=1 SV=3	A2M	P01023	6.46	163.188	1474	4.74898	7	7	310000000	15	4.68114	7	7	220000000	14	29	0.0995357
Ubiquitin-like modifier-activating enzyme 1 OS=Homo sapiens GN=UBA1 PE=1 SV=3	UBA1	P22314	5.76	117.774	1058	16.7297	12	12	92000000	16	13.8941	10	10	71000000	15	31	0.0931094
Histone H2A type 1-B/E OS=Homo sapiens GN=HIST1H2AB PE=1 SV=2	HIST1H2AB	P04908	11.05	14.127	130	68.4615	10	3	36000000000	82	71.5385	9	2	34000000000	77	159	0.0907655
Core histone macro-H2A.1 OS=Homo sapiens GN=H2AFY PE=1 SV=4	H2AFY	O75367	9.79	39.592	372	55.3763	15	14	780000000	50	51.0753	14	13	770000000	47	97	0.0892673
Isoform 4 of Myosin-10 OS=Homo sapiens GN=MYH10	MYH10	P35580-4	5.55	232.385	2007	27.5536	45	36	280000000	70	28.1016	46	39	220000000	66	136	0.0848889
Nucleolar RNA helicase 2 OS=Homo sapiens GN=DDX21 PE=1 SV=5	DDX21	Q9NR30	9.28	87.29	783	40.8685	26	25	290000000	38	37.2925	24	23	250000000	36	74	0.0780025
60S ribosomal protein L3 OS=Homo sapiens GN=RPL3 PE=1 SV=2	RPL3	P39023	10.18	46.08	403	37.7171	13	13	250000000	21	33.2506	12	12	150000000	20	41	0.0703893
Isoform 3 of Polypyrimidine tract-binding protein 1 OS=Homo sapiens GN=PTBP1	PTBP1	P26599-3	9.16	59.596	557	43.447	16	15	230000000	52	48.2944	17	17	200000000	50	102	0.0565835
Cofilin-1 OS=Homo sapiens GN=CFL1 PE=1 SV=1	CFL1	E9PK25	8.34	22.714	204	54.902	14	14	700000000	30	54.4118	13	13	440000000	29	59	0.0489096
Interleukin enhancer-binding factor 2 OS=Homo sapiens GN=ILF2 PE=1 SV=2	ILF2	Q12905	5.26	43.035	390	46.1538	13	13	510000000	31	39.2308	13	13	510000000	30	61	0.0473057
Actin, alpha cardiac muscle 1 OS=Homo sapiens GN=ACTC1 PE=1 SV=1	ACTC1	P68032	5.39	41.992	377	36.3395	12	2	9600000000	49	32.0955	12	1	8600000000	48	97	0.0297473
Keratin, type I cytoskeletal 9 OS=Homo sapiens GN=KRT9 PE=1 SV=3	KRT9	P35527	5.24	62.027	623	72.2311	44	43	5800000000	208	76.244	41	40	5400000000	207	415	0.00695276
Isoform 3 of Cleavage and polyadenylation specificity factor subunit 7 OS=Homo sapiens GN=CPSF7	CPSF7	Q8N684-3	8.87	56.341	514	12.4514	5	5	21000000	5	11.8677	5	5	21000000	5	10	0
60S ribosomal protein L11 OS=Homo sapiens GN=RPL11 PE=1 SV=2	RPL11	P62913	9.6	20.24	178	27.5281	5	5	350000000	5	22.4719	4	4	190000000	5	10	0
40S ribosomal protein S27 OS=Homo sapiens GN=RPS27 PE=1 SV=3	RPS27	P42677	9.45	9.455	84	39.2857	4	4	600000000	10	40.4762	5	5	520000000	10	20	0
Pre-mRNA-splicing factor 38A OS=Homo sapiens GN=PRPF38A PE=1 SV=1	PRPF38A	Q8NAV1	9.96	37.453	312	11.859	3	3	32000000	6	18.5897	4	4	32000000	6	12	0
THO complex subunit 5 homolog OS=Homo sapiens GN=THOC5 PE=1 SV=2	THOC5	Q13769	6.87	78.458	683	1.1713	1	1		1	1.31772	1	1		1	2	0
WD repeat-containing protein 1 OS=Homo sapiens GN=WDR1 PE=1 SV=4	WDR1	O75083	6.65	66.152	606	2.31023	1	1	11000000	1	2.31023	1	1	7300000	1	2	0
Immunoglobulin superfamily member 8 OS=Homo sapiens GN=IGSF8 PE=1 SV=1	IGSF8	Q969P0	8	64.994	613	2.28385	1	1	7000000	1	1.63132	1	1	7800000	1	2	0
Pre-mRNA-splicing factor 38B OS=Homo sapiens GN=PRPF38B PE=1 SV=1	PRPF38B	Q5VTL8	10.54	64.429	546	1.4652	1	1	3100000	1	2.01465	1	1		1	2	0
Serum paraoxonase/arylesterase 1 OS=Homo sapiens GN=PON1 PE=1 SV=3	PON1	P27169	5.22	39.706	355	3.09859	1	1	12000000	1	3.09859	1	1	6200000	1	2	0
THO complex subunit 1 OS=Homo sapiens GN=THOC1 PE=1 SV=1	THOC1	A0A087WWS1	4.98	75.605	657	2.28311	1	1		1	2.28311	1	1	6100000	1	2	0
Pescadillo homolog OS=Homo sapiens GN=PES1 PE=1 SV=1	PES1	O00541	7.33	67.96	588	1.36054	1	1	9800000	1	1.36054	1	1		1	2	0
Serine/arginine repetitive matrix protein 1 OS=Homo sapiens GN=SRRM1 PE=1 SV=1	SRRM1	A9Z1X7	11.85	103.329	913	5.14786	3	3	24000000	6	5.58598	5	5	11000000	6	12	0
High mobility group nucleosome-binding domain-containing protein 4 OS=Homo sapiens GN=HMGN4 PE=1 SV=3	HMGN4	O00479	10.48	9.533	90	16.6667	1	0	370000000	2	20	2	1	38000000	2	4	0
U4/U6.U5 small nuclear ribonucleoprotein 27 kDa protein OS=Homo sapiens GN=SNRNP27 PE=1 SV=1	SNRNP27	B8ZZ98	11.46	19.426	158	6.96203	1	1	18000000	1	6.96203	1	1	56000000	1	2	0
Zinc finger CCCH domain-containing protein 11A OS=Homo sapiens GN=ZC3H11A PE=1 SV=3	ZC3H11A	O75152	8.37	89.076	810	1.23457	1	1		1	1.23457	1	1		1	2	0
ATP-dependent RNA helicase DDX18 OS=Homo sapiens GN=DDX18 PE=1 SV=2	DDX18	Q9NVP1	9.5	75.359	670	17.3134	8	8	56000000	9	19.5522	9	9	46000000	9	18	0
Nucleolar protein 14 OS=Homo sapiens GN=NOP14 PE=1 SV=3	NOP14	P78316	7.58	97.607	857	1.05018	1	1	24000000	1	1.05018	1	1	9700000	1	2	0
Isoform 6 of Latrophilin-2 OS=Homo sapiens GN=LPHN2	LPHN2	O95490-6	6.34	164.961	1474	0.542741	1	1	39000000	1	0.542741	1	1	51000000	1	2	0
SAFB-like transcription modulator OS=Homo sapiens GN=SLTM PE=1 SV=2	SLTM	Q9NWH9	7.87	117.079	1034	5.41586	4	4	18000000	6	6.28627	6	6	21000000	6	12	0
60S ribosomal protein L37 OS=Homo sapiens GN=RPL37 PE=1 SV=2	RPL37	P61927	11.74	11.071	97	8.24742	1	1	44000000	1	8.24742	1	1	31000000	1	2	0
Isoform 2 of AP-2 complex subunit beta OS=Homo sapiens GN=AP2B1	AP2B1	P63010-2	5.34	105.625	951	4.10095	3	3	70000000	3	3.68034	3	3	9000000	3	6	0
Host cell factor 1 OS=Homo sapiens GN=HCFC1 PE=1 SV=2	HCFC1	A6NEM2	7.33	213.343	2080	1.05769	2	2	10000000	2	1.29808	2	2	12000000	2	4	0
Small nuclear ribonucleoprotein Sm D3 OS=Homo sapiens GN=SNRPD3 PE=1 SV=1	SNRPD3	P62318	10.32	13.907	126	33.871	1	1		1	7.14286	1	1	29000000	1	2	0
Isoform 5 of Nuclear pore complex protein Nup214 OS=Homo sapiens GN=NUP214	NUP214	P35658-5	7.69	215.269	2093	4.53894	6	6	11000000	6	3.91782	6	6	10000000	6	12	0
60S ribosomal protein L36 OS=Homo sapiens GN=RPL36 PE=1 SV=3	RPL36	Q9Y3U8	11.59	12.246	105	21.9048	2	2	180000000	3	21.9048	3	3	68000000	3	6	0
Inter-alpha-trypsin inhibitor heavy chain H2 OS=Homo sapiens GN=ITIH2 PE=1 SV=2	ITIH2	P19823	6.86	106.397	946	1.58562	1	1	14000000	1	1.58562	1	1		1	2	0
Cornifin-B OS=Homo sapiens GN=SPRR1B PE=1 SV=2	SPRR1B	P22528	8.48	9.881	89	8.98876	1	1	18000000	1	8.98876	1	1	41000000	1	2	0
CUG triplet repeat, RNA binding protein 1, isoform CRA_c OS=Homo sapiens GN=CELF1 PE=1 SV=1	CELF1	G5EA30	8.38	55.107	514	1.94553	1	1	7200000	1	1.55642	1	1	4500000	1	2	0
Nuclear RNA export factor 1 OS=Homo sapiens GN=NXF1 PE=1 SV=1	NXF1	Q9UBU9	8.51	70.139	619	8.21918	1	1	5900000	1	1.93861	1	1	11000000	1	2	0
Arginine/serine-rich coiled-coil protein 2 OS=Homo sapiens GN=RSRC2 PE=1 SV=1	RSRC2	Q7L4I2	11.33	50.529	434	2.07373	1	1	620000	1	2.07373	1	1	2600000	1	2	0
DNA-directed RNA polymerases I and III subunit RPAC1 OS=Homo sapiens GN=POLR1C PE=1 SV=1	POLR1C	O15160	5.5	39.225	346	5.40541	1	1		1	2.89017	1	1	4800000	1	2	0
WD repeat-containing protein 18 OS=Homo sapiens GN=WDR18 PE=1 SV=2	WDR18	Q9BV38	6.7	47.375	432	4.86111	2	2	50000000	2	4.62963	2	2	30000000	2	4	0
DNA mismatch repair protein Msh6 OS=Homo sapiens GN=MSH6 PE=1 SV=2	MSH6	P52701	6.9	152.689	1360	0.735294	1	1		1	0.735294	1	1	9600000	1	2	0
Reticulon-4 OS=Homo sapiens GN=RTN4 PE=1 SV=2	RTN4	Q9NQC3	4.5	129.851	1192	1.0906	1	1	17000000	1	1.0906	1	1	13000000	1	2	0
Isoform 2 of Protein disulfide-isomerase A6 OS=Homo sapiens GN=PDIA6	PDIA6	Q15084-2	5.33	53.867	492	15.2439	6	6	300000000	11	15.2439	6	6	190000000	11	22	0
Isoform 2 of Nesprin-2 OS=Homo sapiens GN=SYNE2	SYNE2	Q8WXH0-2	5.36	798.362	6907	0.159259	1	1		1	0.202693	1	1	7600000	1	2	0
26S proteasome non-ATPase regulatory subunit 14 OS=Homo sapiens GN=PSMD14 PE=1 SV=1	PSMD14	O00487	6.52	34.555	310	4.19355	1	1		1	4.19355	1	1	31000000	1	2	0
Microtubule-associated protein 1B OS=Homo sapiens GN=MAP1B PE=1 SV=2	MAP1B	D6RCL2	5.45	11.485	103	9.70874	1	1	47000000	1	9.70874	1	1	12000000	1	2	0
Isoform 3 of Hepatoma-derived growth factor OS=Homo sapiens GN=HDGF	HDGF	P51858-3	4.79	28.247	256	12.8906	2	2	52000000	3	12.8906	2	2	10000000	3	6	0
HCG2039996 OS=Homo sapiens GN=PPAN-P2RY11 PE=1 SV=1	PPAN-P2RY11	A0A0B4J1V8	9.51	87.862	794	2.01511	1	1	21000000	3	3.77834	2	2	14000000	3	6	0
Acidic mammalian chitinase OS=Homo sapiens GN=CHIA PE=1 SV=1	CHIA	Q9BZP6	5.85	52.237	476	2.31092	1	1	22000000	1	1.68067	1	1	23000000	1	2	0
ATP synthase subunit e, mitochondrial OS=Homo sapiens GN=ATP5I PE=1 SV=2	ATP5I	P56385	9.35	7.928	69	14.4928	1	1		1	14.4928	1	1	25000000	1	2	0
Isoform 5 of AP-3 complex subunit delta-1 OS=Homo sapiens GN=AP3D1	AP3D1	O14617-5	7.64	136.565	1215	0.658436	1	1	2400000	1	0.658436	1	1	890000	1	2	0
Fibrinogen beta chain OS=Homo sapiens GN=FGB PE=1 SV=2	FGB	P02675	8.27	55.892	491	10.5906	5	5	260000000	6	12.6273	5	5	240000000	6	12	0
Heterogeneous nuclear ribonucleoprotein A0 OS=Homo sapiens GN=HNRNPA0 PE=1 SV=1	HNRNPA0	Q13151	9.29	30.822	305	49.1803	12	11	210000000	19	38.0328	9	8	190000000	19	38	0
Isoform 3 of Nuclear pore complex protein Nup153 OS=Homo sapiens GN=NUP153	NUP153	P49790-3	8.84	157.24	1506	2.05843	2	2	5600000	2	0.863214	1	1	5500000	2	4	0
Isoform 2 of C-terminal-binding protein 2 OS=Homo sapiens GN=CTBP2	CTBP2	P56545-2	8.02	106.121	985	6.39594	4	4	32000000	5	6.49746	5	5	34000000	5	10	0
Sphingosine-1-phosphate lyase 1 OS=Homo sapiens GN=SGPL1 PE=1 SV=3	SGPL1	O95470	9.16	63.483	568	2.8169	1	1		1	2.8169	1	1		1	2	0
Microtubule-associated protein 2 OS=Homo sapiens GN=MAP2 PE=1 SV=4	MAP2	P11137	4.91	199.404	1827	2.62726	3	3	61000000	3	2.62726	3	3	15000000	3	6	0
DNA-directed RNA polymerase OS=Homo sapiens GN=POLR2A PE=1 SV=1	POLR2A	A0A087WWE2	7.85	218.067	1980	1.36364	2	2	9400000	2	1.36364	2	2	5500000	2	4	0
Small nuclear ribonucleoprotein Sm D2 OS=Homo sapiens GN=SNRPD2 PE=1 SV=1	SNRPD2	K7ERG4	8.69	8.771	78	25.641	2	2	85000000	2	25.641	2	2	50000000	2	4	0
40S ribosomal protein S13 OS=Homo sapiens GN=RPS13 PE=1 SV=2	RPS13	P62277	10.54	17.212	151	38.4106	7	7	230000000	10	31.7881	6	6	110000000	10	20	0
Nucleolar GTP-binding protein 1 OS=Homo sapiens GN=GTPBP4 PE=1 SV=3	GTPBP4	Q9BZE4	9.5	73.918	634	7.72871	3	3	21000000	3	7.25552	3	3	27000000	3	6	0
Actin-like protein 6A OS=Homo sapiens GN=ACTL6A PE=1 SV=1	ACTL6A	O96019	5.6	47.43	429	11.655	3	3	43000000	5	17.2494	4	4	17000000	5	10	0
Complement C4-A OS=Homo sapiens GN=C4A PE=1 SV=2	C4A	P0C0L4	7.08	192.664	1744	1.54817	2	2	23000000	3	1.54817	3	3	31000000	3	6	0
60S ribosomal protein L27 (Fragment) OS=Homo sapiens GN=RPL27 PE=1 SV=1	RPL27	K7ELC7	10.58	16.459	144	36.8056	4	4	92000000	4	19.4444	3	3	120000000	4	8	0
Isoform 2 of Actin-related protein 2/3 complex subunit 5 OS=Homo sapiens GN=ARPC5	ARPC5	O15511-2	6.02	16.62	154	7.79221	1	1	34000000	1	7.79221	1	1	38000000	1	2	0
60S ribosomal protein L18 (Fragment) OS=Homo sapiens GN=RPL18 PE=1 SV=1	RPL18	F8VUA6	11.75	14.52	130	40	4	4	390000000	7	39.2308	4	4	290000000	7	14	0
Isoform 3 of Centromere protein V OS=Homo sapiens GN=CENPV	CENPV	Q7Z7K6-3	9.73	29.712	272	29.0441	5	1	89000000	8	32.7206	6	6	87000000	8	16	0
A-kinase anchor protein 8-like OS=Homo sapiens GN=AKAP8L PE=1 SV=3	AKAP8L	Q9ULX6	5.07	71.604	646	2.01238	1	1		1	2.01238	1	1	4200000	1	2	0
Pre-mRNA-splicing factor RBM22 OS=Homo sapiens GN=RBM22 PE=1 SV=1	RBM22	Q9NW64	8.54	46.865	420	6.66667	2	2	9500000	2	4.52381	2	2	5500000	2	4	0
60S ribosomal protein L7-like 1 OS=Homo sapiens GN=RPL7L1 PE=1 SV=1	RPL7L1	Q6DKI1	10.51	28.643	246	7.14286	1	1	18000000	1	6.50407	1	1		1	2	0
Protein RCC2 OS=Homo sapiens GN=RCC2 PE=1 SV=2	RCC2	Q9P258	8.78	56.049	522	39.6552	16	16	110000000	23	35.249	16	16	130000000	23	46	0
60S ribosomal protein L37a OS=Homo sapiens GN=RPL37A PE=1 SV=2	RPL37A	P61513	10.43	10.268	92	21.7391	2	2	42000000	2	21.7391	2	2	43000000	2	4	0
Isoform 2 of Histone-binding protein RBBP7 OS=Homo sapiens GN=RBBP7	RBBP7	Q16576-2	5.27	52.282	469	23.8806	5	3	30000000	5	12.58	4	2	13000000	5	10	0
60S ribosomal protein L18a OS=Homo sapiens GN=RPL18A PE=1 SV=2	RPL18A	Q02543	10.71	20.749	176	32.3864	7	7	200000000	8	32.3864	7	7	140000000	8	16	0
Isoform 4 of 4F2 cell-surface antigen heavy chain OS=Homo sapiens GN=SLC3A2	SLC3A2	P08195-4	4.97	71.079	661	1.96672	1	1	6300000	1	1.96672	1	1	6600000	1	2	0
Multifunctional methyltransferase subunit TRM112-like protein OS=Homo sapiens GN=TRMT112 PE=1 SV=1	TRMT112	F5GX77	8.07	11.964	106	36.7925	3	3	59000000	3	25.4717	2	2	31000000	3	6	0
Beta-2-glycoprotein 1 OS=Homo sapiens GN=APOH PE=1 SV=3	APOH	P02749	7.97	38.273	345	2.6087	1	1	120000000	1	2.6087	1	1	110000000	1	2	0
Protein MAK16 homolog OS=Homo sapiens GN=MAK16 PE=1 SV=2	MAK16	Q9BXY0	5.38	35.347	300	4.33333	1	1	17000000	1	4.33333	1	1	35000000	1	2	0
Probable ATP-dependent RNA helicase DDX20 OS=Homo sapiens GN=DDX20 PE=1 SV=2	DDX20	Q9UHI6	6.95	92.183	824	1.82039	1	1		1	1.82039	1	1		1	2	0
Hepatoma-derived growth factor-related protein 2 OS=Homo sapiens GN=HDGFRP2 PE=1 SV=1	HDGFRP2	Q7Z4V5	7.49	74.272	671	2.23547	1	1	3500000	1	2.23547	1	1	28000000	1	2	0
U2 small nuclear ribonucleoprotein A' OS=Homo sapiens GN=SNRPA1 PE=1 SV=2	SNRPA1	P09661	8.62	28.398	255	14.902	3	3	110000000	3	14.5098	3	3	78000000	3	6	0
Importin subunit alpha-1 OS=Homo sapiens GN=KPNA2 PE=1 SV=1	KPNA2	P52292	5.4	57.826	529	7.75047	1	1		1	2.83554	1	1	10000000	1	2	0
Hemoglobin subunit delta OS=Homo sapiens GN=HBD PE=1 SV=2	HBD	P02042	8.05	16.045	147	6.80272	1	1	510000000	1	6.80272	1	1	650000000	1	2	0
Isoform B of Nucleoporin SEH1 OS=Homo sapiens GN=SEH1L	SEH1L	Q96EE3-1	7.9	46.549	421	7.60095	2	2	13000000	2	7.12589	2	2	23000000	2	4	0
Nuclear pore membrane glycoprotein 210 OS=Homo sapiens GN=NUP210 PE=1 SV=3	NUP210	Q8TEM1	6.81	204.983	1887	1.69581	2	2		2	1.58983	2	2	8900000	2	4	0
THO complex subunit 6 homolog OS=Homo sapiens GN=THOC6 PE=1 SV=1	THOC6	Q86W42	7.43	37.511	341	4.10557	1	1		1	5.57185	1	1		1	2	0
Protein LYRIC OS=Homo sapiens GN=MTDH PE=1 SV=2	MTDH	Q86UE4	9.32	63.799	582	2.74914	1	1	14000000	1	2.74914	1	1		1	2	0
FACT complex subunit SPT16 OS=Homo sapiens GN=SUPT16H PE=1 SV=1	SUPT16H	Q9Y5B9	5.66	119.838	1047	17.765	15	15	180000000	28	19.3887	15	15	210000000	28	56	0
Spliceosome-associated protein CWC15 homolog OS=Homo sapiens GN=CWC15 PE=1 SV=2	CWC15	Q9P013	5.71	26.608	229	4.80349	1	1	14000000	1	4.80349	1	1	11000000	1	2	0
Glutamate dehydrogenase 1, mitochondrial OS=Homo sapiens GN=GLUD1 PE=1 SV=2	GLUD1	P00367	7.8	61.359	558	2.86738	1	1		1	1.25448	1	1	2000000	1	2	0
Emerin OS=Homo sapiens GN=EMD PE=1 SV=1	EMD	P50402	5.5	28.976	254	5.47945	1	1	31000000	1	5.11811	1	1	8100000	1	2	0
Splicing factor, arginine/serine-rich 19 OS=Homo sapiens GN=SCAF1 PE=1 SV=3	SCAF1	Q9H7N4	9.25	139.186	1312	1.14329	1	1		1	1.52439	1	1	5000000	1	2	0
Nucleolar protein 6 OS=Homo sapiens GN=NOL6 PE=1 SV=2	NOL6	Q9H6R4	7.64	127.513	1146	3.31588	2	2	21000000	3	4.01396	3	3	13000000	3	6	0
Glyceraldehyde-3-phosphate dehydrogenase OS=Homo sapiens GN=GAPDH PE=1 SV=3	GAPDH	P04406	8.46	36.03	335	60.2985	16	15	790000000	37	52.5373	13	13	690000000	37	74	0
Dihydrolipoyllysine-residue succinyltransferase component of 2-oxoglutarate dehydrogenase complex, mitochondrial OS=Homo sapiens GN=DLST PE=1 SV=4	DLST	P36957	8.95	48.724	453	2.86976	1	1	4700000	1	2.86976	1	1		1	2	0
60S acidic ribosomal protein P1 OS=Homo sapiens GN=RPLP1 PE=1 SV=1	RPLP1	P05386	4.32	11.507	114	14.0351	1	1	570000000	1	14.0351	1	1	350000000	1	2	0
Interferon-induced, double-stranded RNA-activated protein kinase OS=Homo sapiens GN=EIF2AK2 PE=1 SV=2	EIF2AK2	P19525	8.4	62.056	551	1.99637	1	1	12000000	1	1.99637	1	1	11000000	1	2	0
Paraspeckle component 1 OS=Homo sapiens GN=PSPC1 PE=1 SV=1	PSPC1	Q8WXF1	6.67	58.706	523	10.1338	4	4	40000000	4	8.03059	3	3	35000000	4	8	0
WD repeat-containing protein 36 OS=Homo sapiens GN=WDR36 PE=1 SV=1	WDR36	Q8NI36	7.53	105.255	951	6.51945	4	4	26000000	4	5.78339	4	4	7200000	4	8	0
Apolipoprotein E OS=Homo sapiens GN=APOE PE=1 SV=1	APOE	P02649	5.73	36.132	317	5.36278	2	2	72000000	2	5.36278	2	2	59000000	2	4	0
Ras GTPase-activating-like protein IQGAP1 OS=Homo sapiens GN=IQGAP1 PE=1 SV=1	IQGAP1	P46940	6.48	189.134	1657	2.0519	2	2	8800000	2	1.50875	1	1		2	4	0
Protein FRG1 OS=Homo sapiens GN=FRG1 PE=1 SV=1	FRG1	Q14331	9.01	29.154	258	5.03876	1	1	4400000	1	5.03876	1	1	5600000	1	2	0
Splicing factor 3A subunit 1 OS=Homo sapiens GN=SF3A1 PE=1 SV=1	SF3A1	Q15459	5.22	88.831	793	11.9798	7	7	78000000	11	12.8625	8	8	72000000	11	22	0
Nucleolar transcription factor 1 OS=Homo sapiens GN=UBTF PE=1 SV=1	UBTF	P17480	5.81	89.35	764	5.89005	3	3	15000000	4	6.02094	4	4	15000000	4	8	0
Elongation factor 1-beta OS=Homo sapiens GN=EEF1B2 PE=1 SV=3	EEF1B2	P24534	4.67	24.748	225	10.6667	1	1	18000000	1	6.66667	1	1	61000000	1	2	0
RNA-binding protein with serine-rich domain 1 OS=Homo sapiens GN=RNPS1 PE=1 SV=1	RNPS1	Q15287	11.84	34.188	305	4.91803	1	1		1	2.62295	1	1	25000000	1	2	0
Serpin H1 OS=Homo sapiens GN=SERPINH1 PE=1 SV=2	SERPINH1	P50454	8.69	46.411	418	11.9617	3	3	41000000	3	11.244	3	3	29000000	3	6	0
Myotrophin OS=Homo sapiens GN=MTPN PE=1 SV=2	MTPN	P58546	5.52	12.887	118	14.4068	1	1	13000000	1	14.4068	1	1	10000000	1	2	0
PRA1 family protein 2 OS=Homo sapiens GN=PRAF2 PE=1 SV=1	PRAF2	A6NP52	8.84	17.177	160	6.875	1	1	52000000	1	6.875	1	1	54000000	1	2	0
Isoform 2 of Dermcidin OS=Homo sapiens GN=DCD	DCD	P81605-2	7.97	12.406	121	9.09091	1	1	40000000	1	9.09091	1	1	81000000	1	2	0
Ribosomal RNA processing protein 1 homolog A OS=Homo sapiens GN=RRP1 PE=1 SV=1	RRP1	P56182	9.33	52.807	461	7.37527	3	3	19000000	3	7.37527	3	3	22000000	3	6	0
Heat shock 70 kDa protein 4L OS=Homo sapiens GN=HSPA4L PE=1 SV=3	HSPA4L	O95757	5.88	94.453	839	3.21812	2	1	160000000	2	1.66865	1	0	25000000	2	4	0
Deoxynucleotidyltransferase terminal-interacting protein 2 OS=Homo sapiens GN=DNTTIP2 PE=1 SV=2	DNTTIP2	Q5QJE6	6.16	84.418	756	1.98413	1	1	4600000	1	2.6455	1	1	6100000	1	2	0
Ribosome-binding protein 1 (Fragment) OS=Homo sapiens GN=RRBP1 PE=1 SV=1	RRBP1	A2A2S5	9.89	31.702	300	3.33333	1	1	12000000	1	3.33333	1	1	6600000	1	2	0
Paired mesoderm homeobox protein 2B OS=Homo sapiens GN=PHOX2B PE=1 SV=2	PHOX2B	Q99453	8.84	31.601	314	10.828	4	4	87000000	4	9.55414	3	1	35000000	4	8	0
Microfibrillar-associated protein 1 OS=Homo sapiens GN=MFAP1 PE=1 SV=2	MFAP1	P55081	4.98	51.927	439	3.87244	1	1	43000000	1	1.82232	1	1	38000000	1	2	0
Isoform 2 of Eukaryotic translation initiation factor 5A-1 OS=Homo sapiens GN=EIF5A	EIF5A	P63241-2	7.01	20.157	184	39.6739	5	5	94000000	5	30.4348	4	4	53000000	5	10	0
Elongation factor Tu, mitochondrial OS=Homo sapiens GN=TUFM PE=1 SV=2	TUFM	P49411	7.61	49.51	452	30.531	12	12	120000000	13	30.3097	11	11	140000000	13	26	0
Nuclear pore complex protein Nup98-Nup96 OS=Homo sapiens GN=NUP98 PE=1 SV=4	NUP98	P52948	6.4	197.457	1817	3.96258	7	7	57000000	7	4.23775	7	7	14000000	7	14	0
Unconventional myosin-Ic OS=Homo sapiens GN=MYO1C PE=1 SV=4	MYO1C	O00159	9.41	121.606	1063	3.19849	2	2		3	1.78739	1	1	3200000	3	6	0
Hypoxia up-regulated protein 1 OS=Homo sapiens GN=HYOU1 PE=1 SV=1	HYOU1	K7EQK2	5.73	75.309	678	7.22714	3	3		4	7.81711	4	4	27000000	4	8	0
Protein disulfide-isomerase OS=Homo sapiens GN=P4HB PE=1 SV=3	P4HB	P07237	4.87	57.081	508	11.0236	6	6	47000000	7	14.7638	7	7	45000000	7	14	0
Torsin-1A-interacting protein 1 OS=Homo sapiens GN=TOR1AIP1 PE=1 SV=1	TOR1AIP1	J3KN66	7.9	67.781	599	3.67279	2	2	5600000	2	3.50584	2	2	15000000	2	4	0
Histone H3.2 OS=Homo sapiens GN=HIST2H3A PE=1 SV=3	HIST2H3A	Q71DI3	11.27	15.379	136	50	6	1	10000000000	11	43.3824	4	1	1800000000	11	22	0
Isoform 2 of Proteasome activator complex subunit 3 OS=Homo sapiens GN=PSME3	PSME3	P61289-2	6.11	30.867	267	5.61798	1	1	5000000	1	5.61798	1	1	9100000	1	2	0
High mobility group protein B3 OS=Homo sapiens GN=HMGB3 PE=1 SV=4	HMGB3	O15347	8.37	22.965	200	8	2	1	43000000	2	8	2	1	45000000	2	4	0
Isoform 3 of Transcriptional repressor p66-alpha OS=Homo sapiens GN=GATAD2A	GATAD2A	Q86YP4-3	9.94	68.092	634	1.73502	1	1	27000000	1	1.73502	1	1	31000000	1	2	0
Ribosomal RNA-processing protein 8 OS=Homo sapiens GN=RRP8 PE=1 SV=2	RRP8	O43159	9.42	50.683	456	2.85088	1	1	420000000	1	2.85088	1	1	340000000	1	2	0
26S proteasome non-ATPase regulatory subunit 2 OS=Homo sapiens GN=PSMD2 PE=1 SV=3	PSMD2	Q13200	5.2	100.136	908	4.18502	2	2	2400000	2	2.53304	2	2	10000000	2	4	0
Isoform 2 of Neutral alpha-glucosidase AB OS=Homo sapiens GN=GANAB	GANAB	Q14697-2	6.24	109.369	966	11.4907	7	7	83000000	8	11.2836	7	7	78000000	8	16	0
Signal recognition particle 9 kDa protein OS=Homo sapiens GN=SRP9 PE=1 SV=2	SRP9	P49458	7.97	10.105	86	23.2558	2	2	17000000	2	22.093	2	2	23000000	2	4	0
Probable ATP-dependent RNA helicase DDX56 OS=Homo sapiens GN=DDX56 PE=1 SV=1	DDX56	F8WDT8	5.41	20.33	185	7.56757	1	1	15000000	1	7.56757	1	1	15000000	1	2	0
Complement component C8 beta chain OS=Homo sapiens GN=C8B PE=1 SV=3	C8B	P07358	8.13	67.003	591	1.86125	1	1	46000000	1	1.86125	1	1	47000000	1	2	0
Uncharacterized protein (Fragment) OS=Homo sapiens PE=3 SV=1	NOGENE	H3BVE0	6.71	27.646	249	6.4257	1	1	13000000	1	6.4257	1	1	12000000	1	2	0
Isoform 2 of Protein FAM98B OS=Homo sapiens GN=FAM98B	FAM98B	Q52LJ0-2	8.69	45.519	433	5.31178	2	2	58000000	2	5.54273	2	2	17000000	2	4	0
Triosephosphate isomerase OS=Homo sapiens GN=TPI1 PE=1 SV=3	TPI1	P60174	5.92	30.772	286	4.54545	1	1	4500000	1	4.1958	1	1	20000000	1	2	0
Isoform 2 of Aminoacyl tRNA synthase complex-interacting multifunctional protein 1 OS=Homo sapiens GN=AIMP1	AIMP1	Q12904-2	8.65	37.016	336	3.57143	1	1	16000000	1	3.57143	1	1	8200000	1	2	0
SRA stem-loop-interacting RNA-binding protein, mitochondrial OS=Homo sapiens GN=SLIRP PE=1 SV=1	SLIRP	A0A087WUN7	10.23	10.346	92	15.2174	1	1	37000000	2	26.087	2	2	28000000	2	4	0
Nucleosome assembly protein 1-like 1 OS=Homo sapiens GN=NAP1L1 PE=1 SV=1	NAP1L1	F8W543	4.56	38.176	328	9.7561	3	2	19000000	3	9.7561	3	2	8600000	3	6	0
Probable global transcription activator SNF2L1 OS=Homo sapiens GN=SMARCA1 PE=1 SV=1	SMARCA1	A0A0A0MRP6	8.46	122.786	1058	4.63138	5	5	67000000	6	6.04915	6	1	64000000	6	12	0
Coiled-coil domain-containing protein 124 OS=Homo sapiens GN=CCDC124 PE=1 SV=1	CCDC124	Q96CT7	9.54	25.82	223	5.8296	1	1	16000000	1	5.8296	1	1	5000000	1	2	0
Sarcoplasmic/endoplasmic reticulum calcium ATPase 2 OS=Homo sapiens GN=ATP2A2 PE=1 SV=1	ATP2A2	P16615	5.34	114.683	1042	2.68714	2	2	10000000	2	2.68714	2	2	4400000	2	4	0
Tropomyosin alpha-4 chain OS=Homo sapiens GN=TPM4 PE=1 SV=3	TPM4	P67936	4.69	28.504	248	47.1774	15	8	58000000	20	39.9194	13	5	63000000	20	40	0
Isoform 15 of Fibronectin OS=Homo sapiens GN=FN1	FN1	P02751-15	5.5	272.15	2477	1.17077	2	2	53000000	2	1.09003	2	2	47000000	2	4	0
Splicing factor 3B subunit 5 OS=Homo sapiens GN=SF3B5 PE=1 SV=1	SF3B5	Q9BWJ5	6.35	10.129	86	27.907	2	2	8300000	2	30.2326	2	2	22000000	2	4	0
DBIRD complex subunit ZNF326 OS=Homo sapiens GN=ZNF326 PE=1 SV=2	ZNF326	Q5BKZ1	5.15	65.613	582	2.06186	1	1		1	2.06186	1	1		1	2	0
Histone H3.3 OS=Homo sapiens GN=H3F3A PE=1 SV=2	H3F3A	P84243	11.27	15.319	136	50	6	1	10000000000	10	50	5	2	1900000000	10	20	0
Nucleolar complex protein 3 homolog OS=Homo sapiens GN=NOC3L PE=1 SV=1	NOC3L	Q8WTT2	9.17	92.49	800	15.125	9	9	33000000	9	11.5	7	7	54000000	9	18	0
Small proline-rich protein 2G OS=Homo sapiens GN=SPRR2G PE=2 SV=1	SPRR2G	Q9BYE4	7.96	8.152	73	17.8082	1	1		1	17.8082	1	1	13000000	1	2	0
60S ribosomal protein L6 OS=Homo sapiens GN=RPL6 PE=1 SV=3	RPL6	Q02878	10.58	32.708	288	36.1111	11	11	840000000	18	32.9861	10	10	220000000	18	36	0
Lactotransferrin OS=Homo sapiens GN=LTF PE=1 SV=6	LTF	P02788	8.12	78.132	710	1.26761	1	1	89000000	1	1.26761	1	1	88000000	1	2	0
Apolipoprotein D (Fragment) OS=Homo sapiens GN=APOD PE=1 SV=1	APOD	C9JX71	4.88	16.873	149	9.39597	1	1	18000000	1	9.39597	1	1	28000000	1	2	0
Protein ATP5J2-PTCD1 OS=Homo sapiens GN=ATP5J2-PTCD1 PE=4 SV=1	ATP5J2-PTCD1	G3V325	8.72	84.057	749	1.46862	1	1	8700000	1	1.46862	1	1	27000000	1	2	0
Isoform 2 of Stathmin-2 OS=Homo sapiens GN=STMN2	STMN2	Q93045-2	7.15	21.788	187	10.1604	2	2	61000000	3	10.6952	2	2	27000000	3	6	0
Developmentally-regulated GTP-binding protein 1 OS=Homo sapiens GN=DRG1 PE=1 SV=1	DRG1	Q9Y295	8.9	40.517	367	2.99728	1	1	19000000	1	2.99728	1	1	9000000	1	2	0
Heart- and neural crest derivatives-expressed protein 1 OS=Homo sapiens GN=HAND1 PE=2 SV=1	HAND1	O96004	9.67	23.612	215	12.093	2	1	16000000	2	12.093	2	1	38000000	2	4	0
Hemoglobin subunit alpha OS=Homo sapiens GN=HBA1 PE=1 SV=2	HBA1	P69905	8.68	15.248	142	16.9014	2	2	100000000	3	16.9014	2	2	110000000	3	6	0
Cisplatin resistance-associated overexpressed protein, isoform CRA_b OS=Homo sapiens GN=LUC7L3 PE=1 SV=1	LUC7L3	J3KPP4	9.92	58.185	489	15.7464	7	7	26000000	7	12.0654	6	6	19000000	7	14	0
Activated RNA polymerase II transcriptional coactivator p15 OS=Homo sapiens GN=SUB1 PE=1 SV=3	SUB1	P53999	9.6	14.386	127	18.1102	3	3	23000000	3	25.9843	3	3	33000000	3	6	0
RNA-binding protein 12B OS=Homo sapiens GN=RBM12B PE=1 SV=2	RBM12B	Q8IXT5	6.81	118.03	1001	0.899101	1	1	32000000	1	0.899101	1	1	30000000	1	2	0
Sulfhydryl oxidase 1 OS=Homo sapiens GN=QSOX1 PE=1 SV=3	QSOX1	O00391	8.92	82.526	747	0.937082	1	1	25000000	1	0.937082	1	1	46000000	1	2	0
ATP-dependent RNA helicase DHX8 OS=Homo sapiens GN=DHX8 PE=1 SV=1	DHX8	Q14562	8.32	139.227	1220	0.737705	1	0	29000000	1	0.901639	1	1		1	2	0
Transformer-2 protein homolog alpha OS=Homo sapiens GN=TRA2A PE=1 SV=1	TRA2A	Q13595	11.27	32.669	282	10.6383	3	2	76000000	3	10.6383	3	2	59000000	3	6	0
Death-inducer obliterator 1 OS=Homo sapiens GN=DIDO1 PE=1 SV=5	DIDO1	Q9BTC0	7.88	243.723	2240	0.625	1	1	3900000	1	0.625	1	1		1	2	0
Exosome complex component RRP41 (Fragment) OS=Homo sapiens GN=EXOSC4 PE=1 SV=4	EXOSC4	E9PI41	6.44	28.324	261	9.1954	2	2	26000000	2	9.1954	2	2	22000000	2	4	0
Isoform 7 of Serine/threonine-protein phosphatase 2A 55 kDa regulatory subunit B beta isoform OS=Homo sapiens GN=PPP2R2B	PPP2R2B	Q00005-7	6.79	62.465	549	2.55009	1	1	50000000	1	2.55009	1	1	8400000	1	2	0
Unconventional myosin-Ia OS=Homo sapiens GN=MYO1A PE=1 SV=1	MYO1A	Q9UBC5	9.31	118.326	1043	1.30814	1	1	5800000	1	0.958773	1	1	1200000000	1	2	0
Heterogeneous nuclear ribonucleoprotein H3 OS=Homo sapiens GN=HNRNPH3 PE=1 SV=2	HNRNPH3	P31942	6.87	36.903	346	33.237	9	9	220000000	12	40.7514	9	9	320000000	12	24	0
Keratin, type II cytoskeletal 78 OS=Homo sapiens GN=KRT78 PE=2 SV=2	KRT78	Q8N1N4	6.02	56.83	520	3.84615	2	1	480000000	3	5.96154	3	1	990000000	3	6	0
Isoform 2 of mRNA cap guanine-N7 methyltransferase OS=Homo sapiens GN=RNMT	RNMT	O43148-2	7.69	57.688	504	3.76984	1	1	39000000	2	3.76984	1	1	25000000	2	4	0
RNA binding motif protein, X-linked-like-1 OS=Homo sapiens GN=RBMXL1 PE=1 SV=1	RBMXL1	Q96E39	9.89	42.116	390	26.4103	9	9	360000000	13	24.8718	10	1	360000000	13	26	0
Isoform 3 of Chromatin modification-related protein MEAF6 OS=Homo sapiens GN=MEAF6	MEAF6	Q9HAF1-3	8.28	22.741	201	7.46269	1	1		1	7.46269	1	1	580000	1	2	0
Isoform 5 of Splicing factor 1 OS=Homo sapiens GN=SF1	SF1	Q15637-5	9.58	71.706	673	14.1159	7	7	70000000	9	14.1159	7	7	34000000	9	18	0
Exosome complex exonuclease RRP44 OS=Homo sapiens GN=DIS3 PE=1 SV=2	DIS3	Q9Y2L1	7.14	108.934	958	1.35699	1	1	12000000	1	1.35699	1	1	17000000	1	2	0
Isoform 3 of Replication protein A 32 kDa subunit OS=Homo sapiens GN=RPA2	RPA2	P15927-3	8.94	38.786	358	6.42458	1	1	21000000	1	6.42458	1	1	12000000	1	2	0
Coilin OS=Homo sapiens GN=COIL PE=1 SV=1	COIL	P38432	9.07	62.57	576	1.73611	1	1	3200000	1	1.73611	1	1	11000000	1	2	0
U6 snRNA-associated Sm-like protein LSm3 OS=Homo sapiens GN=LSM3 PE=1 SV=2	LSM3	P62310	4.7	11.838	102	11.7647	1	1	49000000	1	11.7647	1	1		1	2	0
Glutamate-rich WD repeat-containing protein 1 OS=Homo sapiens GN=GRWD1 PE=1 SV=1	GRWD1	Q9BQ67	4.92	49.388	446	3.13901	1	1	12000000	1	3.13901	1	1	4500000	1	2	0
Nucleoporin NUP53 OS=Homo sapiens GN=NUP35 PE=1 SV=1	NUP35	F8WCF5	7.18	13.918	136	27.2059	2	2	25000000	2	13.2353	1	1	11000000	2	4	0
Keratin, type II cytoskeletal 5 OS=Homo sapiens GN=KRT5 PE=1 SV=3	KRT5	P13647	7.74	62.34	590	37.1186	25	15	2300000000	43	42.7119	27	18	1600000000	43	86	0
Heterochromatin protein 1-binding protein 3 OS=Homo sapiens GN=HP1BP3 PE=1 SV=1	HP1BP3	Q5SSJ5	9.67	61.169	553	20.2532	9	9	120000000	11	22.4231	10	10	75000000	11	22	0
U6 snRNA-associated Sm-like protein LSm6 OS=Homo sapiens GN=LSM6 PE=1 SV=1	LSM6	P62312	9.58	9.122	80	20	2	2	12000000	2	22.5	2	2	19000000	2	4	0
Polymerase delta-interacting protein 3 OS=Homo sapiens GN=POLDIP3 PE=1 SV=1	POLDIP3	F6VRR5	9.92	48.073	438	7.76256	2	2	32000000	2	7.53425	2	2	11000000	2	4	0
Protein IGLV8-61 (Fragment) OS=Homo sapiens GN=IGLV8-61 PE=1 SV=3	IGLV8-61	A0A075B6I0	4.55	12.806	122	7.37705	1	1	93000000	1	7.37705	1	1	56000000	1	2	0
Transmembrane protein 33 OS=Homo sapiens GN=TMEM33 PE=1 SV=2	TMEM33	P57088	9.7	27.96	247	2.83401	1	1	16000000	1	2.83401	1	1	24000000	1	2	0
Exocyst complex component 4 OS=Homo sapiens GN=EXOC4 PE=1 SV=1	EXOC4	Q96A65	6.49	110.429	974	0.924025	1	1		1	1.23203	1	1		1	2	0
Splicing factor 3A subunit 2 OS=Homo sapiens GN=SF3A2 PE=1 SV=2	SF3A2	Q15428	9.64	49.224	464	10.9914	4	4	45000000	5	9.05172	4	4	35000000	5	10	0
Macrophage migration inhibitory factor OS=Homo sapiens GN=MIF PE=1 SV=4	MIF	P14174	7.88	12.468	115	7.82609	1	1	250000000	1	7.82609	1	1	150000000	1	2	0
Catenin delta-1 OS=Homo sapiens GN=CTNND1 PE=1 SV=1	CTNND1	O60716	6.23	108.103	968	4.75207	4	4	21000000	4	5.57851	4	4	8800000	4	8	0
Ig gamma-2 chain C region OS=Homo sapiens GN=IGHG2 PE=1 SV=2	IGHG2	P01859	7.59	35.878	326	3.98773	2	2	610000000	10	3.98773	2	2	1100000000	10	20	0
Nuclear pore complex protein Nup107 OS=Homo sapiens GN=NUP107 PE=1 SV=1	NUP107	P57740	5.43	106.307	925	2.27027	2	2	13000000	2	2.27027	2	2	14000000	2	4	0
Membrane primary amine oxidase OS=Homo sapiens GN=AOC3 PE=1 SV=3	AOC3	Q16853	6.52	84.568	763	2.22805	2	2	40000000	2	2.22805	2	2	30000000	2	4	0
ATP-dependent RNA helicase DDX50 OS=Homo sapiens GN=DDX50 PE=1 SV=1	DDX50	A0A087WVB0	9.63	82.662	736	8.42391	3	2	120000000	4	7.06522	3	2	100000000	4	8	0
Complement C3 OS=Homo sapiens GN=C3 PE=1 SV=2	C3	P01024	6.4	187.03	1663	4.14913	5	5	470000000	10	3.54781	6	6	440000000	10	20	0
Polyadenylate-binding protein 1 (Fragment) OS=Homo sapiens GN=PABPC1 PE=1 SV=1	PABPC1	H0YAP2	9.64	15.146	131	25.5814	1	1	770000000	2	16.0305	2	2	31000000	2	4	0
Desmoglein-1 OS=Homo sapiens GN=DSG1 PE=1 SV=2	DSG1	Q02413	5.03	113.676	1049	7.72164	5	5	15000000	7	9.9142	7	7	30000000	7	14	0
Histone H2AX OS=Homo sapiens GN=H2AFX PE=1 SV=2	H2AFX	P16104	10.74	15.135	143	63.6364	9	2	26000000000	64	66.4336	9	2	29000000000	65	129	-0.0223678
Heterogeneous nuclear ribonucleoprotein U OS=Homo sapiens GN=HNRNPU PE=1 SV=6	HNRNPU	Q00839	6	90.528	825	44.2424	33	4	2000000000	89	43.7576	35	5	1600000000	91	180	-0.0320612
Splicing factor 3B subunit 3 OS=Homo sapiens GN=SF3B3 PE=1 SV=4	SF3B3	Q15393	5.26	135.492	1217	27.5267	23	23	2000000000	43	29.5809	25	25	190000000	44	87	-0.0331669
Isoform Short of Heterogeneous nuclear ribonucleoprotein U OS=Homo sapiens GN=HNRNPU	HNRNPU	Q00839-2	5.78	88.924	806	43.0521	31	2	2000000000	86	42.5558	32	2	1600000000	88	174	-0.0331669
Histone H2A type 2-A OS=Homo sapiens GN=HIST2H2AA3 PE=1 SV=3	HIST2H2AA3	Q6FI13	10.9	14.087	130	68.4615	11	4	34000000000	73	68.4615	10	4	34000000000	75	148	-0.0389941
Histone H2B type 3-B OS=Homo sapiens GN=HIST3H2BB PE=1 SV=3	HIST3H2BB	Q8N257	10.32	13.9	126	72.2222	11	3	17000000000	70	57.1429	11	2	31000000000	72	142	-0.040642
Actin, cytoplasmic 1 OS=Homo sapiens GN=ACTB PE=1 SV=1	ACTB	P60709	5.48	41.71	375	70.6667	22	12	17000000000	169	86.4	25	14	14000000000	174	343	-0.0420641
Pyruvate kinase PKM OS=Homo sapiens GN=PKM PE=1 SV=4	PKM	P14618	7.84	57.9	531	52.1657	19	19	240000000	31	48.9642	22	22	210000000	32	63	-0.0458037
Histone H2B type 1-J OS=Homo sapiens GN=HIST1H2BJ PE=1 SV=3	HIST1H2BJ	P06899	10.32	13.896	126	74.6032	13	1	21000000000	78	74.6032	14	0	33000000000	81	159	-0.0544478
Heterogeneous nuclear ribonucleoproteins A2/B1 OS=Homo sapiens GN=HNRNPA2B1 PE=1 SV=2	HNRNPA2B1	P22626	8.95	37.407	353	73.3711	32	28	2800000000	101	74.5042	34	30	2800000000	105	206	-0.056034
ATP-dependent RNA helicase A OS=Homo sapiens GN=DHX9 PE=1 SV=4	DHX9	Q08211	6.84	140.869	1270	44.9606	42	42	620000000	74	41.2598	40	40	470000000	77	151	-0.0573332
Heterogeneous nuclear ribonucleoprotein H2 OS=Homo sapiens GN=HNRNPH2 PE=1 SV=1	HNRNPH2	P55795	6.3	49.232	449	34.5212	11	4	1200000000	24	26.0579	10	3	950000000	25	49	-0.0588937
Keratin, type II cytoskeletal 6A OS=Homo sapiens GN=KRT6A PE=1 SV=3	KRT6A	P02538	8	60.008	564	40.2482	23	11	2800000000	39	45.7447	25	3	2000000000	41	80	-0.0721498
Splicing factor, proline- and glutamine-rich OS=Homo sapiens GN=SFPQ PE=1 SV=2	SFPQ	P23246	9.44	76.102	707	43.4229	27	26	920000000	56	45.8274	27	26	910000000	59	115	-0.0752881
Heterogeneous nuclear ribonucleoproteins C1/C2 OS=Homo sapiens GN=HNRNPC PE=1 SV=4	HNRNPC	P07910	5.08	33.65	306	37.2549	14	14	2800000000	37	45.7516	16	16	2300000000	39	76	-0.0759489
116 kDa U5 small nuclear ribonucleoprotein component OS=Homo sapiens GN=EFTUD2 PE=1 SV=1	EFTUD2	Q15029	5	109.366	972	28.3951	21	20	290000000	34	34.465	23	22	210000000	36	70	-0.0824622
Heterogeneous nuclear ribonucleoprotein A3 OS=Homo sapiens GN=HNRNPA3 PE=1 SV=2	HNRNPA3	P51991	9.01	39.571	378	52.9101	23	3	450000000	49	51.5873	21	2	420000000	52	101	-0.0857299
Histone H2B type 1-K OS=Homo sapiens GN=HIST1H2BK PE=1 SV=3	HIST1H2BK	O60814	10.32	13.882	126	74.6032	13	3	21000000000	81	74.6032	14	3	33000000000	86	167	-0.0864148
Histone H2B type 1-O OS=Homo sapiens GN=HIST1H2BO PE=1 SV=3	HIST1H2BO	P23527	10.32	13.898	126	74.6032	13	2	21000000000	78	74.6032	15	2	33000000000	83	161	-0.0896372
Isoform 2 of Heterogeneous nuclear ribonucleoprotein A3 OS=Homo sapiens GN=HNRNPA3	HNRNPA3	P51991-2	8.31	37.006	356	51.1236	21	1	450000000	45	50	20	1	420000000	48	93	-0.0931094
Isoform 2 of Drebrin OS=Homo sapiens GN=DBN1	DBN1	Q16643-2	4.53	71.555	651	31.6436	16	16	260000000	29	27.6498	14	14	200000000	31	60	-0.0962153
Isoform Beta of Nucleolar and coiled-body phosphoprotein 1 OS=Homo sapiens GN=NOLC1	NOLC1	Q14978-2	9.47	74.702	709	15.5148	12	12	82000000	14	15.5148	13	13	110000000	15	29	-0.0995357
KH domain-containing, RNA-binding, signal transduction-associated protein 1 OS=Homo sapiens GN=KHDRBS1 PE=1 SV=1	KHDRBS1	Q07666	8.66	48.197	443	19.4131	9	9	350000000	13	19.6388	10	10	340000000	14	27	-0.106915
60S ribosomal protein L13 OS=Homo sapiens GN=RPL13 PE=1 SV=4	RPL13	P26373	11.65	24.247	211	34.1232	9	9	270000000	13	42.1801	10	10	270000000	14	27	-0.106915
60S ribosomal protein L10a OS=Homo sapiens GN=RPL10A PE=1 SV=2	RPL10A	P62906	9.94	24.816	217	35.023	7	7	200000000	13	35.023	7	7	140000000	14	27	-0.106915
RNA-binding protein FUS OS=Homo sapiens GN=FUS PE=1 SV=1	FUS	H3BPE7	9.36	53.465	527	16.3188	7	5	320000000	12	15.1803	6	5	240000000	13	25	-0.115477
Pre-mRNA-processing factor 6 OS=Homo sapiens GN=PRPF6 PE=1 SV=1	PRPF6	O94906	8.25	106.858	941	14.559	12	12	71000000	12	13.8151	12	12	44000000	13	25	-0.115477
Isoform 2 of U5 small nuclear ribonucleoprotein 40 kDa protein OS=Homo sapiens GN=SNRNP40	SNRNP40	Q96DI7-2	7.9	44.488	409	27.6284	6	6	74000000	12	27.6284	6	6	54000000	13	25	-0.115477
Isoform 2 of Nucleoside diphosphate kinase A OS=Homo sapiens GN=NME1	NME1	P15531-2	5.58	19.641	177	39.548	6	1	440000000	12	33.8983	5	5	320000000	13	25	-0.115477
Hornerin OS=Homo sapiens GN=HRNR PE=1 SV=2	HRNR	Q86YZ3	10.04	282.228	2850	26.1754	18	18	110000000	34	32.2807	24	24	110000000	37	71	-0.121991
High mobility group protein B2 OS=Homo sapiens GN=HMGB2 PE=1 SV=2	HMGB2	P26583	7.81	24.019	209	48.8038	10	9	170000000	11	41.1483	8	6	160000000	12	23	-0.125531
X-ray repair cross-complementing protein 5 OS=Homo sapiens GN=XRCC5 PE=1 SV=3	XRCC5	P13010	5.81	82.652	732	27.0492	13	13	100000000	21	29.7814	14	14	150000000	23	44	-0.131245
Isoform 3 of Scaffold attachment factor B1 OS=Homo sapiens GN=SAFB	SAFB	Q15424-3	5.49	102.793	917	14.6129	11	9	73000000	20	19.9564	15	10	82000000	22	42	-0.137504
60S ribosomal protein L5 OS=Homo sapiens GN=RPL5 PE=1 SV=3	RPL5	P46777	9.72	34.341	297	30.6397	8	8	130000000	10	26.936	8	8	69000000	11	21	-0.137504
Desmoplakin OS=Homo sapiens GN=DSP PE=1 SV=3	DSP	P15924	6.81	331.569	2871	7.59317	17	17	56000000	20	8.46395	19	19	58000000	22	42	-0.137504
THO complex subunit 4 OS=Homo sapiens GN=ALYREF PE=1 SV=1	ALYREF	E9PB61	11.05	27.541	264	30.6818	4	4	110000000	9	26.5152	3	3	79000000	10	19	-0.152003
Pre-mRNA-processing-splicing factor 8 OS=Homo sapiens GN=PRPF8 PE=1 SV=2	PRPF8	Q6P2Q9	8.84	273.427	2335	18.758	32	32	130000000	44	18.9293	31	31	81000000	49	93	-0.155278
60 kDa heat shock protein, mitochondrial OS=Homo sapiens GN=HSPD1 PE=1 SV=2	HSPD1	P10809	5.87	61.016	573	46.5969	21	21	270000000	35	49.0401	24	24	300000000	39	74	-0.156119
Spectrin alpha chain, non-erythrocytic 1 OS=Homo sapiens GN=SPTAN1 PE=1 SV=3	SPTAN1	Q13813	5.35	284.364	2472	15.3722	26	26	120000000	34	16.4239	28	1	120000000	38	72	-0.160465
Serine/threonine-protein phosphatase PP1-beta catalytic subunit OS=Homo sapiens GN=PPP1CB PE=1 SV=3	PPP1CB	P62140	6.19	37.163	327	37.6147	11	1	140000000	17	39.1437	12	1	120000000	19	36	-0.160465
Putative RNA-binding protein Luc7-like 2 OS=Homo sapiens GN=LUC7L2 PE=1 SV=2	LUC7L2	Q9Y383	10.01	46.486	392	26.5306	10	7	240000000	17	26.2755	10	7	310000000	19	36	-0.160465
General transcription factor II-I OS=Homo sapiens GN=GTF2I PE=1 SV=2	GTF2I	P78347	6.39	112.346	998	17.3347	11	11	85000000	17	19.6393	14	14	74000000	19	36	-0.160465
Isoform Gamma-2 of Serine/threonine-protein phosphatase PP1-gamma catalytic subunit OS=Homo sapiens GN=PPP1CC	PPP1CC	P36873-2	6.13	38.493	337	36.4985	11	1	140000000	17	36.7953	12	1	120000000	19	36	-0.160465
Histone H1.4 OS=Homo sapiens GN=HIST1H1E PE=1 SV=2	HIST1H1E	P10412	11.03	21.852	219	41.5525	16	5	6000000000	25	42.0091	17	5	5600000000	28	53	-0.163499
Isoform 2 of Heterogeneous nuclear ribonucleoprotein R OS=Homo sapiens GN=HNRNPR	HNRNPR	O43390-2	8.13	71.17	636	40.2516	25	16	1100000000	41	41.5094	25	1	630000000	46	87	-0.16601
Isoform 2 of ELAV-like protein 1 OS=Homo sapiens GN=ELAVL1	ELAVL1	Q15717-2	9.45	38.972	353	19.83	7	7	180000000	8	24.0793	7	7	99000000	9	17	-0.169925
Neutral alpha-glucosidase AB OS=Homo sapiens GN=GANAB PE=1 SV=3	GANAB	Q14697	6.14	106.807	944	11.7585	7	7	83000000	8	13.7712	8	8	78000000	9	17	-0.169925
Caldesmon OS=Homo sapiens GN=CALD1 PE=1 SV=1	CALD1	E9PGZ1	6.11	61.669	536	15.4851	7	7	37000000	8	18.2836	8	8	32000000	9	17	-0.169925
Stress-70 protein, mitochondrial OS=Homo sapiens GN=HSPA9 PE=1 SV=2	HSPA9	P38646	6.16	73.635	679	14.7275	8	8	58000000	8	14.1384	8	8	61000000	9	17	-0.169925
Putative pre-mRNA-splicing factor ATP-dependent RNA helicase DHX15 OS=Homo sapiens GN=DHX15 PE=1 SV=2	DHX15	O43143	7.46	90.875	795	26.1635	18	17	210000000	24	29.8113	22	22	150000000	27	51	-0.169925
Keratin, type II cytoskeletal 7 OS=Homo sapiens GN=KRT7 PE=1 SV=5	KRT7	P08729	5.48	51.354	469	4.26439	3	3	700000000	46	6.82303	3	1	61000000	52	98	-0.176878
Probable ATP-dependent RNA helicase DDX5 OS=Homo sapiens GN=DDX5 PE=1 SV=1	DDX5	P17844	8.92	69.105	614	47.7199	25	19	710000000	45	48.2085	23	17	570000000	51	96	-0.180572
E3 ubiquitin-protein ligase TRIM21 OS=Homo sapiens GN=TRIM21 PE=1 SV=1	TRIM21	P19474	6.38	54.135	475	34.7368	13	13	850000000	29	44.8421	16	16	680000000	33	62	-0.186413
Isoform 3 of L-lactate dehydrogenase A chain OS=Homo sapiens GN=LDHA	LDHA	P00338-3	8.43	39.812	361	23.8227	7	5	1400000000	14	28.8089	9	7	1200000000	16	30	-0.192645
Splicing factor U2AF 35 kDa subunit OS=Homo sapiens GN=U2AF1 PE=1 SV=3	U2AF1	Q01081	8.81	27.854	240	22.0833	4	4	280000000	7	25.4167	5	5	320000000	8	15	-0.192645
Paired mesoderm homeobox protein 2A OS=Homo sapiens GN=PHOX2A PE=1 SV=2	PHOX2A	O14813	8.76	29.635	284	32.3944	7	7	110000000	7	35.5634	6	4	56000000	8	15	-0.192645
Isoform 4 of Scaffold attachment factor B1 OS=Homo sapiens GN=SAFB	SAFB	Q15424-4	5.49	102.706	916	14.6288	11	9	73000000	20	20.8515	16	11	82000000	23	43	-0.201634
Isoform 2 of Spectrin alpha chain, non-erythrocytic 1 OS=Homo sapiens GN=SPTAN1	SPTAN1	Q13813-2	5.35	284.919	2477	14.6145	25	25	120000000	33	16.4312	28	1	120000000	38	71	-0.203533
Keratin, type II cytoskeletal 6B OS=Homo sapiens GN=KRT6B PE=1 SV=5	KRT6B	P04259	8	60.03	564	33.5106	20	9	3200000000	46	43.9716	24	2	2800000000	53	99	-0.204358
Histone H1.2 OS=Homo sapiens GN=HIST1H1C PE=1 SV=2	HIST1H1C	P16403	10.93	21.352	213	45.5399	16	6	6000000000	26	46.4789	19	7	5600000000	30	56	-0.206451
RNA-binding protein Raly OS=Homo sapiens GN=RALY PE=1 SV=1	RALY	Q9UKM9	9.17	32.444	306	54.902	13	13	330000000	19	54.902	13	13	280000000	22	41	-0.211504
Isoform 2 of Chromodomain-helicase-DNA-binding protein 4 OS=Homo sapiens GN=CHD4	CHD4	Q14839-2	5.97	220.709	1940	12.6289	15	15	50000000	19	12.6804	17	17	47000000	22	41	-0.211504
Keratin, type II cytoskeletal 2 epidermal OS=Homo sapiens GN=KRT2 PE=1 SV=2	KRT2	P35908	8	65.393	639	82.9421	48	40	6600000000	164	78.8732	47	36	6600000000	190	354	-0.212304
RNA-binding motif protein, X chromosome OS=Homo sapiens GN=RBMX PE=1 SV=3	RBMX	P38159	10.05	42.306	391	40.9207	16	16	470000000	25	40.9207	18	9	460000000	29	54	-0.214125
Heterogeneous nuclear ribonucleoprotein R OS=Homo sapiens GN=HNRNPR PE=1 SV=1	HNRNPR	O43390	8.13	70.899	633	43.4439	26	17	1100000000	43	41.5482	26	2	630000000	50	93	-0.217591
60S ribosomal protein L28 OS=Homo sapiens GN=RPL28 PE=1 SV=3	RPL28	P46779	12.02	15.738	137	26.2774	5	5	110000000	6	29.927	6	6	120000000	7	13	-0.222392
Nuclear pore complex protein Nup133 OS=Homo sapiens GN=NUP133 PE=1 SV=2	NUP133	Q8WUM0	5.1	128.898	1156	7.43945	5	5	40000000	6	7.95848	6	6	38000000	7	13	-0.222392
Isoform 6 of Cellular nucleic acid-binding protein OS=Homo sapiens GN=CNBP	CNBP	P62633-6	7.58	19.678	179	30.7263	4	4	120000000	6	34.0782	5	5	25000000	7	13	-0.222392
Tricarboxylate transport protein, mitochondrial OS=Homo sapiens GN=SLC25A1 PE=1 SV=2	SLC25A1	P53007	9.89	33.991	311	17.6849	5	5	76000000	6	13.8264	4	4	76000000	7	13	-0.222392
Serine/threonine-protein phosphatase PP1-alpha catalytic subunit OS=Homo sapiens GN=PPP1CA PE=1 SV=1	PPP1CA	P62136	6.33	37.488	330	40.6061	12	2	140000000	18	43.6364	14	3	120000000	21	39	-0.222392
Calreticulin OS=Homo sapiens GN=CALR PE=1 SV=1	CALR	P27797	4.44	48.112	417	15.5875	4	4	59000000	6	13.9089	5	5	67000000	7	13	-0.222392
Serine/arginine-rich splicing factor 7 OS=Homo sapiens GN=SRSF7 PE=1 SV=1	SRSF7	Q16629	11.82	27.35	238	31.5126	9	8	390000000	12	29.8319	7	6	520000000	14	26	-0.222392
Histone-binding protein RBBP4 OS=Homo sapiens GN=RBBP4 PE=1 SV=3	RBBP4	Q09028	4.89	47.626	425	12.7059	4	2	59000000	6	12.7059	4	2	77000000	7	13	-0.222392
Chromobox protein homolog 1 OS=Homo sapiens GN=CBX1 PE=1 SV=1	CBX1	P83916	4.93	21.405	185	34.5946	6	6	70000000	6	34.5946	6	6	72000000	7	13	-0.222392
Isoform 2 of Tumor suppressor p53-binding protein 1 OS=Homo sapiens GN=TP53BP1	TP53BP1	Q12888-2	4.7	213.985	1977	3.74305	6	6	14000000	6	3.54072	4	4	12000000	7	13	-0.222392
60S ribosomal protein L7 OS=Homo sapiens GN=RPL7 PE=1 SV=1	RPL7	P18124	10.65	29.207	248	37.9032	9	9	380000000	12	39.9194	12	12	200000000	14	26	-0.222392
Serine/arginine-rich splicing factor 3 OS=Homo sapiens GN=SRSF3 PE=1 SV=1	SRSF3	P84103	11.65	19.318	164	46.3415	10	9	910000000	28	46.3415	9	8	1000000000	33	61	-0.237039
60S ribosomal protein L15 OS=Homo sapiens GN=RPL15 PE=1 SV=2	RPL15	P61313	11.62	24.131	204	31.8627	6	6	370000000	11	42.1569	9	9	310000000	13	24	-0.241008
Histone H1.0 OS=Homo sapiens GN=H1F0 PE=1 SV=3	H1F0	P07305	10.84	20.85	194	36.0825	8	8	620000000	11	32.4742	7	7	650000000	13	24	-0.241008
E3 SUMO-protein ligase RanBP2 OS=Homo sapiens GN=RANBP2 PE=1 SV=2	RANBP2	P49792	6.2	357.974	3224	5.42804	11	11	28000000	11	6.85484	13	13	27000000	13	24	-0.241008
Transducin beta-like protein 3 OS=Homo sapiens GN=TBL3 PE=1 SV=2	TBL3	Q12788	6.9	88.978	808	12.8713	6	6	21000000	11	18.3168	9	9	28000000	13	24	-0.241008
Isoform 4 of Probable 28S rRNA (cytosine(4447)-C(5))-methyltransferase OS=Homo sapiens GN=NOP2	NOP2	P46087-4	9.19	92.803	845	14.5562	11	11	74000000	11	16.9231	12	12	88000000	13	24	-0.241008
Isoform 5 of RNA-binding protein EWS OS=Homo sapiens GN=EWSR1	EWSR1	Q01844-5	9.29	68.923	661	7.26172	4	4	81000000	11	10.59	6	6	61000000	13	24	-0.241008
Keratin, type I cytoskeletal 10 OS=Homo sapiens GN=KRT10 PE=1 SV=6	KRT10	P13645	5.21	58.792	584	65.411	41	37	4200000000	248	65.411	42	39	4700000000	295	543	-0.250375
DNA-dependent protein kinase catalytic subunit OS=Homo sapiens GN=PRKDC PE=1 SV=3	PRKDC	P78527	7.12	468.788	4128	15.5039	46	46	140000000	63	18.2655	54	54	110000000	75	138	-0.251539
Prohibitin OS=Homo sapiens GN=PHB PE=1 SV=1	PHB	P35232	5.76	29.786	272	60.6618	12	12	250000000	21	72.7941	14	14	260000000	25	46	-0.251539
Ribosome biogenesis regulatory protein homolog OS=Homo sapiens GN=RRS1 PE=1 SV=2	RRS1	Q15050	10.7	41.168	365	13.6986	4	4	21000000	5	23.5616	5	5	34000000	6	11	-0.263034
Protein disulfide-isomerase A3 (Fragment) OS=Homo sapiens GN=PDIA3 PE=1 SV=1	PDIA3	H7BZJ3	7.3	13.511	123	33.3333	4	1	130000000	5	41.4634	5	1	130000000	6	11	-0.263034
Small ubiquitin-related modifier 2 OS=Homo sapiens GN=SUMO2 PE=1 SV=3	SUMO2	P61956	5.5	10.864	95	27.3684	3	3	380000000	5	27.3684	3	3	310000000	6	11	-0.263034
Fibrinogen gamma chain OS=Homo sapiens GN=FGG PE=1 SV=1	FGG	C9JC84	5.63	52.304	461	9.76139	3	3	370000000	5	9.76139	3	3	300000000	6	11	-0.263034
60S ribosomal protein L23a OS=Homo sapiens GN=RPL23A PE=1 SV=1	RPL23A	K7EMA7	9.23	7.918	70	47.1429	4	4	440000000	5	48.5714	5	5	250000000	6	11	-0.263034
ATP-binding cassette sub-family F member 1 OS=Homo sapiens GN=ABCF1 PE=1 SV=2	ABCF1	Q8NE71	6.8	95.866	845	6.27219	4	4	40000000	5	7.81065	5	5	32000000	6	11	-0.263034
Isoform 2 of AP-2 complex subunit alpha-2 OS=Homo sapiens GN=AP2A2	AP2A2	O94973-2	6.86	104.024	940	7.12766	5	5	10000000	5	4.46809	4	4	12000000	6	11	-0.263034
Keratin, type II cytoskeletal 1 OS=Homo sapiens GN=KRT1 PE=1 SV=6	KRT1	P04264	8.12	65.999	644	71.8944	52	49	12000000000	307	71.8944	51	45	12000000000	370	677	-0.269287
Non-histone chromosomal protein HMG-17 OS=Homo sapiens GN=HMGN2 PE=1 SV=3	HMGN2	P05204	9.99	9.387	90	56.6667	7	7	150000000	14	65.5556	9	8	180000000	17	31	-0.280108
Poly [ADP-ribose] polymerase 1 OS=Homo sapiens GN=PARP1 PE=1 SV=4	PARP1	P09874	8.88	113.012	1014	37.4753	26	26	370000000	37	37.0809	27	27	330000000	45	82	-0.2824
Histone H1.3 OS=Homo sapiens GN=HIST1H1D PE=1 SV=2	HIST1H1D	P16402	11.02	22.336	221	37.1041	14	5	6000000000	23	41.629	17	7	5600000000	28	51	-0.283793
Prelamin-A/C OS=Homo sapiens GN=LMNA PE=1 SV=1	LMNA	Q5TCI8	7.02	55.729	491	26.6802	16	14	470000000	23	32.3829	19	18	540000000	28	51	-0.283793
Isoform 2 of Fructose-bisphosphate aldolase A OS=Homo sapiens GN=ALDOA	ALDOA	P04075-2	8.25	45.232	418	36.8421	11	11	240000000	32	35.1675	10	10	190000000	39	71	-0.285402
Beta-actin-like protein 2 OS=Homo sapiens GN=ACTBL2 PE=1 SV=2	ACTBL2	Q562R1	5.59	41.976	376	11.4362	4	0	5800000000	18	18.883	6	1	4900000000	22	40	-0.289507
Cytoskeleton-associated protein 4 OS=Homo sapiens GN=CKAP4 PE=1 SV=2	CKAP4	Q07065	5.92	65.983	602	10.4651	4	4	20000000	9	17.7741	7	7	28000000	11	20	-0.289507
Histone H1.5 OS=Homo sapiens GN=HIST1H1B PE=1 SV=3	HIST1H1B	P16401	10.92	22.566	226	41.5929	18	14	4100000000	31	40.708	18	14	4000000000	38	69	-0.293731
Lamina-associated polypeptide 2, isoforms beta/gamma OS=Homo sapiens GN=TMPO PE=1 SV=2	TMPO	P42167	9.38	50.639	454	34.5815	10	10	84000000	13	39.207	10	10	99000000	16	29	-0.29956
Ribosomal L1 domain-containing protein 1 OS=Homo sapiens GN=RSL1D1 PE=1 SV=3	RSL1D1	O76021	10.13	54.939	490	30	11	11	63000000	13	36.9388	14	14	76000000	16	29	-0.29956
X-ray repair cross-complementing protein 6 OS=Homo sapiens GN=XRCC6 PE=1 SV=2	XRCC6	P12956	6.64	69.799	609	21.1823	12	12	93000000	17	24.7947	14	14	96000000	21	38	-0.304855
Histone H4 OS=Homo sapiens GN=HIST1H4A PE=1 SV=2	HIST1H4A	P62805	11.36	11.36	103	58.2524	12	12	3900000000	38	65.0485	16	16	4300000000	47	85	-0.306661
Exportin-1 OS=Homo sapiens GN=XPO1 PE=1 SV=1	XPO1	O14980	6.06	123.306	1071	11.4846	8	8	59000000	12	11.0177	8	8	39000000	15	27	-0.321928
Isoform 1 of Voltage-dependent anion-selective channel protein 2 OS=Homo sapiens GN=VDAC2	VDAC2	P45880-1	7.59	33.351	309	9.70874	2	2	18000000	4	13.5922	3	3	37000000	5	9	-0.321928
pre-rRNA processing protein FTSJ3 OS=Homo sapiens GN=FTSJ3 PE=1 SV=2	FTSJ3	Q8IY81	8.4	96.499	847	18.536	11	11	76000000	12	19.4805	12	12	75000000	15	27	-0.321928
Isoform HMG-Y of High mobility group protein HMG-I/HMG-Y OS=Homo sapiens GN=HMGA1	HMGA1	P17096-2	10.32	10.673	96	26.0417	4	1	48000000	4	26.0417	3	1	24000000	5	9	-0.321928
DNA topoisomerase 1 OS=Homo sapiens GN=TOP1 PE=1 SV=2	TOP1	P11387	9.31	90.669	765	10.3268	6	6	71000000	8	11.634	8	8	52000000	10	18	-0.321928
60S ribosomal protein L29 OS=Homo sapiens GN=RPL29 PE=1 SV=2	RPL29	P47914	11.66	17.741	159	25.1572	4	4	190000000	4	29.5597	5	5	140000000	5	9	-0.321928
DNA-(apurinic or apyrimidinic site) lyase OS=Homo sapiens GN=APEX1 PE=1 SV=2	APEX1	P27695	8.12	35.532	318	18.5535	4	4	17000000	4	20.1258	4	4	18000000	5	9	-0.321928
Barrier-to-autointegration factor OS=Homo sapiens GN=BANF1 PE=1 SV=1	BANF1	O75531	6.09	10.052	89	21.3483	3	3	21000000	4	58.427	5	5	64000000	5	9	-0.321928
Serine/arginine-rich-splicing factor 1 OS=Homo sapiens GN=SRSF1 PE=1 SV=1	SRSF1	J3KSW7	5.14	8.103	73	41.0959	3	3	100000000	8	41.0959	3	3	58000000	10	18	-0.321928
FACT complex subunit SSRP1 OS=Homo sapiens GN=SSRP1 PE=1 SV=1	SSRP1	Q08945	6.87	81.024	709	14.2454	8	8	140000000	8	13.5402	8	8	170000000	10	18	-0.321928
Structural maintenance of chromosomes flexible hinge domain-containing protein 1 OS=Homo sapiens GN=SMCHD1 PE=1 SV=2	SMCHD1	A6NHR9	7.3	226.231	2005	2.49377	4	4	35000000	4	2.89277	5	5	13000000	5	9	-0.321928
Immunoglobulin J chain OS=Homo sapiens GN=IGJ PE=1 SV=4	IGJ	P01591	5.24	18.087	159	10.6918	2	2	320000000	4	11.3208	3	3	280000000	5	9	-0.321928
Histone H2A.Z OS=Homo sapiens GN=H2AFZ PE=1 SV=2	H2AFZ	P0C0S5	10.58	13.545	128	53.9062	6	4	19000000000	30	53.9062	6	4	23000000000	38	68	-0.341037
U4/U6 small nuclear ribonucleoprotein Prp4 OS=Homo sapiens GN=PRPF4 PE=1 SV=2	PRPF4	O43172	7.42	58.412	522	15.7088	6	6	33000000	7	21.0728	7	7	35000000	9	16	-0.36257
60S ribosomal protein L30 OS=Homo sapiens GN=RPL30 PE=1 SV=2	RPL30	P62888	9.63	12.776	115	55.6522	5	5	240000000	7	58.2609	5	5	200000000	9	16	-0.36257
Galectin-1 OS=Homo sapiens GN=LGALS1 PE=1 SV=2	LGALS1	P09382	5.5	14.706	135	27.4074	3	3	240000000	7	54.0741	6	6	220000000	9	16	-0.36257
Scaffold attachment factor B2 OS=Homo sapiens GN=SAFB2 PE=1 SV=1	SAFB2	Q14151	6.16	107.408	953	6.71563	4	2	31000000	10	11.3326	7	2	73000000	13	23	-0.378512
Heterogeneous nuclear ribonucleoprotein A1 OS=Homo sapiens GN=HNRNPA1 PE=1 SV=5	HNRNPA1	P09651	9.13	38.723	372	47.5806	21	17	400000000	53	55.1075	25	21	390000000	69	122	-0.380604
60S ribosomal protein L9 OS=Homo sapiens GN=RPL9 PE=1 SV=1	RPL9	P32969	9.95	21.85	192	39.5833	5	5	260000000	13	39.5833	5	5	240000000	17	30	-0.387023
Heart- and neural crest derivatives-expressed protein 2 OS=Homo sapiens GN=HAND2 PE=1 SV=1	HAND2	P61296	9.17	23.651	217	14.7465	3	2	19000000	3	14.7465	3	2	22000000	4	7	-0.415037
60S ribosomal protein L38 OS=Homo sapiens GN=RPL38 PE=1 SV=2	RPL38	P63173	10.1	8.213	70	47.1429	4	4	200000000	9	47.1429	5	5	280000000	12	21	-0.415037
Glucosidase 2 subunit beta OS=Homo sapiens GN=PRKCSH PE=1 SV=1	PRKCSH	K7ELL7	4.41	60.154	535	5.60748	3	3	29000000	3	8.41121	4	4	39000000	4	7	-0.415037
Protein SET OS=Homo sapiens GN=SET PE=1 SV=3	SET	Q01105	4.32	33.469	290	20.3448	3	3	49000000	3	20.3448	3	3	51000000	4	7	-0.415037
60S ribosomal protein L23 OS=Homo sapiens GN=RPL23 PE=1 SV=1	RPL23	J3KTJ3	10.14	8.894	81	40.7407	4	4	480000000	6	41.9753	5	5	380000000	8	14	-0.415037
Spectrin beta chain, non-erythrocytic 1 OS=Homo sapiens GN=SPTBN1 PE=1 SV=2	SPTBN1	Q01082	5.57	274.439	2364	14.9323	24	20	130000000	36	16.709	30	26	95000000	48	84	-0.415037
Filaggrin-2 OS=Homo sapiens GN=FLG2 PE=1 SV=1	FLG2	Q5D862	8.31	247.928	2391	4.30782	6	6	39000000	6	4.85153	6	6	48000000	8	14	-0.415037
Isoform 3 of Calumenin OS=Homo sapiens GN=CALU	CALU	O43852-3	4.63	38.027	323	7.12074	2	2	30000000	3	10.5263	3	3	30000000	4	7	-0.415037
Guanine nucleotide-binding protein-like 3 OS=Homo sapiens GN=GNL3 PE=1 SV=2	GNL3	Q9BVP2	9.16	61.954	549	6.19308	3	3	20000000	3	6.19308	3	3	23000000	4	7	-0.415037
Eukaryotic translation initiation factor 1A, Y-chromosomal OS=Homo sapiens GN=EIF1AY PE=1 SV=4	EIF1AY	O14602	5.24	16.432	144	15.2778	2	2	16000000	3	20.1389	3	3	15000000	4	7	-0.415037
Stathmin-2 OS=Homo sapiens GN=STMN2 PE=1 SV=3	STMN2	Q93045	8.32	20.815	179	10.6145	2	2	61000000	3	15.6425	3	3	19000000	4	7	-0.415037
Small ubiquitin-related modifier 1 OS=Homo sapiens GN=SUMO1 PE=1 SV=1	SUMO1	B8ZZN6	6.2	16.634	146	14.3836	2	2	97000000	3	19.863	3	3	74000000	4	7	-0.415037
Neurabin-2 OS=Homo sapiens GN=PPP1R9B PE=1 SV=1	PPP1R9B	D3DTX6	4.97	89.28	817	6.85435	3	3	33000000	3	5.14076	3	3	8400000	4	7	-0.415037
Nuclear mitotic apparatus protein 1 OS=Homo sapiens GN=NUMA1 PE=1 SV=2	NUMA1	Q14980	5.78	238.115	2115	28.6052	45	45	190000000	61	32.6714	52	52	130000000	82	143	-0.426815
40S ribosomal protein S7 OS=Homo sapiens GN=RPS7 PE=1 SV=1	RPS7	B5MCP9	10.27	21.299	187	51.8717	9	9	450000000	23	57.2193	11	11	530000000	31	54	-0.430634
Lamin B2, isoform CRA_a OS=Homo sapiens GN=LMNB2 PE=1 SV=1	LMNB2	J9JID7	5.59	69.906	620	20.6452	15	12	220000000	17	27.9032	21	18	320000000	23	40	-0.436099
PC4 and SFRS1-interacting protein OS=Homo sapiens GN=PSIP1 PE=1 SV=1	PSIP1	O75475	9.13	60.067	530	24.5283	11	11	170000000	14	25.8491	12	12	160000000	19	33	-0.440573
60S ribosomal protein L8 OS=Homo sapiens GN=RPL8 PE=1 SV=2	RPL8	P62917	11.03	28.007	257	31.5175	6	6	130000000	11	42.0233	9	9	200000000	15	26	-0.447459
Spectrin beta chain, non-erythrocytic 1 OS=Homo sapiens GN=SPTBN1 PE=1 SV=1	SPTBN1	A0A087WUZ3	5.57	274.659	2366	14.4125	23	19	130000000	35	16.6948	30	26	95000000	48	83	-0.455679
RNA-binding protein 4 OS=Homo sapiens GN=RBM4 PE=1 SV=1	RBM4	Q9BWF3	7.08	40.289	364	25.8242	7	7	53000000	8	33.7912	9	3	75000000	11	19	-0.459432
Lamin-B1 OS=Homo sapiens GN=LMNB1 PE=1 SV=2	LMNB1	P20700	5.16	66.368	586	40.6143	23	20	470000000	33	48.4642	29	26	520000000	46	79	-0.479168
Isoform 2 of Calnexin OS=Homo sapiens GN=CANX	CANX	P27824-2	4.7	71.458	627	6.53907	3	3	29000000	5	9.56938	4	4	14000000	7	12	-0.485427
RRP12-like protein OS=Homo sapiens GN=RRP12 PE=1 SV=2	RRP12	Q5JTH9	8.75	143.611	1297	4.54896	5	5	19000000	5	6.93909	7	7	24000000	7	12	-0.485427
Filaggrin OS=Homo sapiens GN=FLG PE=1 SV=3	FLG	P20930	9.25	434.922	4061	1.13273	5	5	8400000	5	4.35853	5	5	3400000	7	12	-0.485427
L-lactate dehydrogenase B chain OS=Homo sapiens GN=LDHB PE=1 SV=2	LDHB	P07195	6.05	36.615	334	12.8743	4	2	510000000	5	18.5629	6	4	560000000	7	12	-0.485427
Splicing factor 3B subunit 6 OS=Homo sapiens GN=SF3B6 PE=1 SV=1	SF3B6	Q9Y3B4	9.38	14.576	125	38.4	4	4	41000000	5	27.2	3	3	28000000	7	12	-0.485427
Ribosome biogenesis protein BRX1 homolog OS=Homo sapiens GN=BRIX1 PE=1 SV=2	BRIX1	Q8TDN6	9.92	41.375	353	19.2635	5	5	45000000	5	26.0623	6	6	59000000	7	12	-0.485427
Keratin, type I cytoskeletal 17 OS=Homo sapiens GN=KRT17 PE=1 SV=2	KRT17	Q04695	5.02	48.076	432	24.0741	14	2	2900000000	17	26.3889	13	2	3500000000	24	41	-0.4975
Dopamine beta-hydroxylase OS=Homo sapiens GN=DBH PE=1 SV=3	DBH	P09172	6.42	69.021	617	7.45543	3	3	56000000	7	15.235	6	6	48000000	10	17	-0.514573
Cleavage and polyadenylation specificity factor subunit 5 OS=Homo sapiens GN=NUDT21 PE=1 SV=1	NUDT21	O43809	8.82	26.211	227	50.6608	8	8	220000000	14	69.163	11	11	270000000	20	34	-0.514573
Nucleolar protein 56 OS=Homo sapiens GN=NOP56 PE=1 SV=4	NOP56	O00567	9.19	66.009	594	37.7104	16	16	160000000	23	43.4343	21	21	140000000	33	56	-0.520832
Keratin, type I cytoskeletal 16 OS=Homo sapiens GN=KRT16 PE=1 SV=4	KRT16	P08779	5.05	51.236	473	49.26	22	9	4000000000	32	57.5053	24	14	4600000000	46	78	-0.523562
ATP synthase subunit beta, mitochondrial OS=Homo sapiens GN=ATP5B PE=1 SV=3	ATP5B	P06576	5.4	56.525	529	35.5388	12	12	170000000	16	39.5085	14	14	200000000	23	39	-0.523562
DNA topoisomerase 2-beta OS=Homo sapiens GN=TOP2B PE=1 SV=3	TOP2B	Q02880	8	183.152	1626	14.8216	19	19	73000000	20	14.9446	21	21	67000000	29	49	-0.536053
Zinc finger RNA-binding protein OS=Homo sapiens GN=ZFR PE=1 SV=2	ZFR	Q96KR1	9.04	116.939	1074	7.72812	6	6	13000000	6	8.56611	7	7	7500000	9	15	-0.584963
Immunoglobulin lambda-like polypeptide 5 OS=Homo sapiens GN=IGLL5 PE=1 SV=1	IGLL5	A0A087WWC9	7.09	24.668	231	3.4632	1	1	470000000	2	3.4632	1	1	240000000	3	5	-0.584963
[truncated: 341 more rows]
