# Supplementary material for: The interactome of the copper transporter ATP7A belongs to a network of neurodevelopmental and neurodegeneration factors
Source: eLife. 2017 Mar 29;6:e24722. doi: 10.7554/eLife.24722 (PMC5400511; doi:10.7554/eLife.24722)
Supplement: Supplementary file 2. — Proteome data from crosslinked ATP7A complexes isolated from human ATP7A null fibroblasts and rescue cells (ATP7AR/R) as indicated in Figure 1 and Material and methods. Cutoff selection criteria of hits are defined in Material and methods. All hits below the selection cutoff were used to curate the BCS and copper treated proteomes in Supplementary file 1 to give origin to the ATP7A interactome in the Supplementary file 3 Tab (BCS+Cu Hits). DOI: http://dx.doi.org/10.7554/eLife.24722.014 [file elife-24722-supp2.xlsx]

## Sheet: Hits
Description	Gene	Accession	CalcPI	#AA	MW[kDA]	ATP7A R/R PSMs	ATP7A-/- PSMs	Log2 Ratio ATP7A R/R / ATP7A-/-
Eukaryotic translation initiation factor 2 subunit 3 OS=Homo sapiens GN=EIF2S3 PE=1 SV=3	EIF2S3	P41091	8.4	472	51.077	6	0	6.64
Isoform 2 of Copper-transporting ATPase 1 OS=Homo sapiens GN=ATP7A	ATP7A	Q04656-3	6.38	1581	171.968	6	0	6.64
Sickle tail protein homolog OS=Homo sapiens GN=KIAA1217 PE=1 SV=2	KIAA1217	Q5T5P2	7.06	1943	213.983	5	0	6.64
Dynein light chain 1, cytoplasmic OS=Homo sapiens GN=DYNLL1 PE=1 SV=1	DYNLL1	P63167	7.4	89	10.359	5	0	6.64
Desmocollin-1 OS=Homo sapiens GN=DSC1 PE=1 SV=2	DSC1	Q08554	5.43	894	99.924	5	0	6.64
Isoform 2 of Heterogeneous nuclear ribonucleoprotein D-like OS=Homo sapiens GN=HNRNPDL	HNRNPDL	O14979-2	7.31	301	33.568	5	0	6.64
Histone deacetylase 2 OS=Homo sapiens GN=HDAC2 PE=1 SV=2	HDAC2	Q92769	5.91	488	55.329	5	0	6.64
PC4 and SFRS1-interacting protein OS=Homo sapiens GN=PSIP1 PE=1 SV=1	PSIP1	O75475	9.13	530	60.067	5	0	6.64
Gamma-interferon-inducible protein 16 OS=Homo sapiens GN=IFI16 PE=1 SV=3	IFI16	Q16666	9.28	785	88.199	5	0	6.64
40S ribosomal protein S25 OS=Homo sapiens GN=RPS25 PE=1 SV=1	RPS25	P62851	10.11	125	13.734	4	0	6.64
Isoform 2 of Transketolase OS=Homo sapiens GN=TKT	TKT	P29401-2	7.52	631	68.77	4	0	6.64
Ribosome biogenesis regulatory protein homolog OS=Homo sapiens GN=RRS1 PE=1 SV=2	RRS1	Q15050	10.7	365	41.168	4	0	6.64
Importin subunit alpha-5 OS=Homo sapiens GN=KPNA1 PE=1 SV=3	KPNA1	P52294	5.01	538	60.184	4	0	6.64
Keratin, type II cytoskeletal 71 OS=Homo sapiens GN=KRT71 PE=1 SV=3	KRT71	Q3SY84	6.61	523	57.256	4	0	6.64
Protein S100-A9 OS=Homo sapiens GN=S100A9 PE=1 SV=1	S100A9	P06702	6.13	114	13.234	4	0	6.64
Protein UXT OS=Homo sapiens GN=UXT PE=4 SV=1	UXT	A0A0C4DFR8	7.12	169	19.584	4	0	6.64
Isoform 8 of Protein LAP2 OS=Homo sapiens GN=ERBB2IP	ERBB2IP	Q96RT1-8	5.63	1419	158.926	4	0	6.64
Small ubiquitin-related modifier 4 OS=Homo sapiens GN=SUMO4 PE=1 SV=2	SUMO4	Q6EEV6	7.18	95	10.678	4	0	6.64
Tubulin beta-6 chain OS=Homo sapiens GN=TUBB6 PE=1 SV=1	TUBB6	Q9BUF5	4.88	446	49.825	11	1	3.46
Histone acetyltransferase p300 OS=Homo sapiens GN=EP300 PE=1 SV=2	EP300	Q09472	8.5	2414	263.99	10	1	3.32
Protein PRRC2A OS=Homo sapiens GN=PRRC2A PE=1 SV=3	PRRC2A	P48634	9.45	2157	228.724	9	1	3.17
Isoform 5 of Rap1 GTPase-GDP dissociation stimulator 1 OS=Homo sapiens GN=RAP1GDS1	RAP1GDS1	P52306-5	5.31	608	66.346	9	1	3.17
Isoform 2 of Nuclear factor NF-kappa-B p105 subunit OS=Homo sapiens GN=NFKB1	NFKB1	P19838-2	5.4	969	105.361	23	3	2.94
Alternative protein ASNSD1 OS=Homo sapiens GN=ASNSD1 PE=1 SV=1	ASNSD1	L0R819	8.88	96	11.243	7	1	2.81
Keratin, type II cytoskeletal 4 OS=Homo sapiens GN=KRT4 PE=1 SV=4	KRT4	P19013	6.61	534	57.25	51	8	2.67
Glutamine--fructose-6-phosphate aminotransferase [isomerizing] 1 OS=Homo sapiens GN=GFPT1 PE=1 SV=3	GFPT1	Q06210	7.11	699	78.756	6	1	2.58
Asparagine synthetase domain-containing protein 1 (Fragment) OS=Homo sapiens GN=ASNSD1 PE=1 SV=1	ASNSD1	U3KQP1	8.53	246	27.669	6	1	2.58
Isoform 3 of Keratin, type II cytoskeletal 80 OS=Homo sapiens GN=KRT80	KRT80	Q6KB66-3	5.39	487	54.142	35	7	2.32
TNFAIP3-interacting protein 2 OS=Homo sapiens GN=TNIP2 PE=1 SV=1	TNIP2	Q8NFZ5	6.44	429	48.669	10	2	2.32
Nucleolar GTP-binding protein 1 OS=Homo sapiens GN=GTPBP4 PE=1 SV=3	GTPBP4	Q9BZE4	9.5	634	73.918	5	1	2.32
Keratin, type II cuticular Hb4 OS=Homo sapiens GN=KRT84 PE=2 SV=2	KRT84	Q9NSB2	7.56	600	64.801	5	1	2.32
Apoptosis inhibitor 5 OS=Homo sapiens GN=API5 PE=1 SV=3	API5	Q9BZZ5	7.34	524	58.968	5	1	2.32
TELO2-interacting protein 1 homolog OS=Homo sapiens GN=TTI1 PE=1 SV=3	TTI1	O43156	5.97	1089	121.992	5	1	2.32
Histone H1x OS=Homo sapiens GN=H1FX PE=1 SV=1	H1FX	Q92522	10.76	213	22.474	5	1	2.32
F-box-like/WD repeat-containing protein TBL1XR1 OS=Homo sapiens GN=TBL1XR1 PE=1 SV=1	TBL1XR1	Q9BZK7	5.55	514	55.56	5	1	2.32
SWI/SNF complex subunit SMARCC2 OS=Homo sapiens GN=SMARCC2 PE=1 SV=1	SMARCC2	F8VXC8	5.71	1245	136.1	5	1	2.32
Cleavage and polyadenylation specificity factor subunit 5 OS=Homo sapiens GN=NUDT21 PE=1 SV=1	NUDT21	O43809	8.82	227	26.211	5	1	2.32
Myoferlin OS=Homo sapiens GN=MYOF PE=1 SV=1	MYOF	Q9NZM1	6.18	2061	234.561	5	1	2.32
Isoform 5 of Rho guanine nucleotide exchange factor 7 OS=Homo sapiens GN=ARHGEF7	ARHGEF7	Q14155-5	6.84	731	82.519	5	1	2.32
Golgin subfamily A member 2 OS=Homo sapiens GN=GOLGA2 PE=1 SV=3	GOLGA2	Q08379	5.02	1002	113.017	14	3	2.22
Catenin beta-1 OS=Homo sapiens GN=CTNNB1 PE=1 SV=1	CTNNB1	B4DGU4	5.92	774	84.712	9	2	2.17
Rho guanine nucleotide exchange factor 2 OS=Homo sapiens GN=ARHGEF2 PE=1 SV=1	ARHGEF2	V9GYM8	7.37	1031	115.999	8	2	2
Isoform 2 of Casein kinase I isoform alpha OS=Homo sapiens GN=CSNK1A1	CSNK1A1	P48729-2	9.6	365	41.91	8	2	2
F-actin-capping protein subunit alpha-1 OS=Homo sapiens GN=CAPZA1 PE=1 SV=3	CAPZA1	P52907	5.69	286	32.902	8	2	2
40S ribosomal protein S10 OS=Homo sapiens GN=RPS10 PE=1 SV=1	RPS10	P46783	10.15	165	18.886	4	1	2
E3 ubiquitin-protein ligase DTX3L OS=Homo sapiens GN=DTX3L PE=1 SV=1	DTX3L	Q8TDB6	8.06	740	83.501	4	1	2
26S protease regulatory subunit 6A OS=Homo sapiens GN=PSMC3 PE=1 SV=3	PSMC3	P17980	5.24	439	49.172	4	1	2
T-complex protein 1 subunit eta OS=Homo sapiens GN=CCT7 PE=1 SV=2	CCT7	Q99832	7.65	543	59.329	4	1	2
p53 and DNA damage-regulated protein 1 OS=Homo sapiens GN=PDRG1 PE=1 SV=2	PDRG1	Q9NUG6	6.06	133	15.501	4	1	2
Isoform 2 of Stress-induced-phosphoprotein 1 OS=Homo sapiens GN=STIP1	STIP1	P31948-2	7.74	590	68.037	4	1	2
60S ribosomal protein L11 OS=Homo sapiens GN=RPL11 PE=1 SV=2	RPL11	P62913	9.6	178	20.24	4	1	2
LanC-like protein 1 OS=Homo sapiens GN=LANCL1 PE=1 SV=1	LANCL1	O43813	7.75	399	45.254	4	1	2
60S ribosomal protein L26 OS=Homo sapiens GN=RPL26 PE=1 SV=1	RPL26	P61254	10.55	145	17.248	4	1	2
U2 small nuclear ribonucleoprotein A' OS=Homo sapiens GN=SNRPA1 PE=1 SV=2	SNRPA1	P09661	8.62	255	28.398	4	1	2
Caprin-1 OS=Homo sapiens GN=CAPRIN1 PE=1 SV=2	CAPRIN1	Q14444	5.25	709	78.318	15	4	1.91
40S ribosomal protein S4, X isoform OS=Homo sapiens GN=RPS4X PE=1 SV=2	RPS4X	P62701	10.15	263	29.579	11	3	1.87
Thyroid hormone receptor-associated protein 3 OS=Homo sapiens GN=THRAP3 PE=1 SV=2	THRAP3	Q9Y2W1	10.15	955	108.601	7	2	1.81
Guanine nucleotide-binding protein subunit beta-2-like 1 (Fragment) OS=Homo sapiens GN=GNB2L1 PE=1 SV=1	GNB2L1	H0YAM7	7.85	247	27.398	7	2	1.81
Antigen KI-67 OS=Homo sapiens GN=MKI67 PE=1 SV=2	MKI67	P46013	9.45	3256	358.474	7	2	1.81
Filaggrin-2 OS=Homo sapiens GN=FLG2 PE=1 SV=1	FLG2	Q5D862	8.31	2391	247.928	7	2	1.81
Isoform 2 of BTB/POZ domain-containing protein 10 OS=Homo sapiens GN=BTBD10	BTBD10	Q9BSF8-2	7.14	483	54.372	7	2	1.81
T-complex protein 1 subunit gamma OS=Homo sapiens GN=CCT3 PE=1 SV=4	CCT3	P49368	6.49	545	60.495	13	4	1.7
RNA polymerase II-associated protein 3 OS=Homo sapiens GN=RPAP3 PE=1 SV=2	RPAP3	Q9H6T3	6.84	665	75.672	18	6	1.58
Gamma-tubulin complex component 3 OS=Homo sapiens GN=TUBGCP3 PE=1 SV=2	TUBGCP3	Q96CW5	8.12	907	103.506	15	5	1.58
Ras GTPase-activating protein-binding protein 1 OS=Homo sapiens GN=G3BP1 PE=1 SV=1	G3BP1	Q13283	5.52	466	52.132	12	4	1.58
Isoform 2 of UPF0562 protein C7orf55 OS=Homo sapiens GN=C7orf55	C7orf55	Q96HJ9-2	10.13	458	54.191	9	3	1.58
Putative helicase MOV-10 OS=Homo sapiens GN=MOV10 PE=1 SV=2	MOV10	Q9HCE1	8.82	1003	113.599	6	2	1.58
60S ribosomal protein L3 OS=Homo sapiens GN=RPL3 PE=1 SV=2	RPL3	P39023	10.18	403	46.08	6	2	1.58
Isoform 2 of Heterogeneous nuclear ribonucleoprotein D0 OS=Homo sapiens GN=HNRNPD	HNRNPD	Q14103-2	8.1	336	36.249	6	2	1.58
60S ribosomal protein L7 OS=Homo sapiens GN=RPL7 PE=1 SV=1	RPL7	P18124	10.65	248	29.207	6	2	1.58
Putative RNA-binding protein Luc7-like 1 OS=Homo sapiens GN=LUC7L PE=1 SV=1	LUC7L	Q9NQ29	9.92	371	43.701	6	2	1.58
Isoform Non-brain of Clathrin light chain A OS=Homo sapiens GN=CLTA	CLTA	P09496-2	4.53	218	23.647	6	2	1.58
CCR4-NOT transcription complex subunit 1 OS=Homo sapiens GN=CNOT1 PE=1 SV=2	CNOT1	A5YKK6	7.11	2376	266.768	6	2	1.58
Isoform 7 of Protein PRRC2C OS=Homo sapiens GN=PRRC2C	PRRC2C	Q9Y520-7	9.13	2898	316.888	32	11	1.54
Isoform 3 of Protein NEDD1 OS=Homo sapiens GN=NEDD1	NEDD1	Q8NHV4-3	7.97	667	72.665	20	7	1.51
Regulator of nonsense transcripts 2 OS=Homo sapiens GN=UPF2 PE=1 SV=1	UPF2	Q9HAU5	5.69	1272	147.717	14	5	1.49
Isoform 9 of Eukaryotic translation initiation factor 4 gamma 1 OS=Homo sapiens GN=EIF4G1	EIF4G1	Q04637-9	5.34	1606	176.128	14	5	1.49
Isoform F of Constitutive coactivator of PPAR-gamma-like protein 1 OS=Homo sapiens GN=FAM120A	FAM120A	Q9NZB2-6	9	1146	125.192	11	4	1.46
UDP-N-acetylglucosamine--peptide N-acetylglucosaminyltransferase 110 kDa subunit OS=Homo sapiens GN=OGT PE=1 SV=3	OGT	O15294	6.7	1046	116.85	19	7	1.44
Keratin, type I cytoskeletal 13 OS=Homo sapiens GN=KRT13 PE=1 SV=4	KRT13	P13646	4.96	458	49.557	19	7	1.44
Isoform 3 of Protein transport protein Sec24B OS=Homo sapiens GN=SEC24B	SEC24B	O95487-3	6.57	1298	140.333	8	3	1.42
Isoform 2 of Eukaryotic initiation factor 4A-II OS=Homo sapiens GN=EIF4A2	EIF4A2	Q14240-2	5.48	408	46.46	8	3	1.42
Importin subunit alpha-7 OS=Homo sapiens GN=KPNA6 PE=1 SV=1	KPNA6	O60684	4.98	536	59.991	8	3	1.42
Ataxin-2 OS=Homo sapiens GN=ATXN2 PE=1 SV=2	ATXN2	Q99700	9.57	1313	140.196	8	3	1.42
Isoform 3 of Polyadenylate-binding protein 4 OS=Homo sapiens GN=PABPC4	PABPC4	Q13310-3	9.35	660	72.345	23	9	1.35
Protein CASC3 OS=Homo sapiens GN=CASC3 PE=1 SV=2	CASC3	O15234	6.48	703	76.232	20	8	1.32
Calcium/calmodulin-dependent protein kinase type II subunit delta OS=Homo sapiens GN=CAMK2D PE=1 SV=1	CAMK2D	E9PF82	7.27	533	59.966	10	4	1.32
YTH domain-containing family protein 1 OS=Homo sapiens GN=YTHDF1 PE=1 SV=1	YTHDF1	Q9BYJ9	8.79	559	60.836	5	2	1.32
RNA-binding protein Raly OS=Homo sapiens GN=RALY PE=1 SV=1	RALY	Q9UKM9	9.17	306	32.444	5	2	1.32
Eukaryotic translation initiation factor 3 subunit I OS=Homo sapiens GN=EIF3I PE=1 SV=1	EIF3I	Q13347	5.64	325	36.479	5	2	1.32
RNA-binding protein 39 OS=Homo sapiens GN=RBM39 PE=1 SV=2	RBM39	Q14498	10.1	530	59.343	5	2	1.32
FACT complex subunit SSRP1 OS=Homo sapiens GN=SSRP1 PE=1 SV=1	SSRP1	Q08945	6.87	709	81.024	5	2	1.32
YTH domain-containing family protein 2 OS=Homo sapiens GN=YTHDF2 PE=1 SV=2	YTHDF2	Q9Y5A9	8.79	579	62.296	5	2	1.32
Keratin, type I cytoskeletal 18 OS=Homo sapiens GN=KRT18 PE=1 SV=2	KRT18	P05783	5.45	430	48.029	5	2	1.32
Catenin delta-1 OS=Homo sapiens GN=CTNND1 PE=1 SV=1	CTNND1	O60716	6.23	968	108.103	5	2	1.32
Translational activator GCN1 OS=Homo sapiens GN=GCN1L1 PE=1 SV=6	GCN1L1	Q92616	7.47	2671	292.572	5	2	1.32
Isoform 2 of Putative ATP-dependent RNA helicase DHX30 OS=Homo sapiens GN=DHX30	DHX30	Q7L2E3-2	8.6	1222	136.03	5	2	1.32
Non-histone chromosomal protein HMG-17 OS=Homo sapiens GN=HMGN2 PE=1 SV=3	HMGN2	P05204	9.99	90	9.387	5	2	1.32
Synaptic vesicle membrane protein VAT-1 homolog OS=Homo sapiens GN=VAT1 PE=1 SV=2	VAT1	Q99536	6.29	393	41.893	5	2	1.32
Nucleolar RNA helicase 2 OS=Homo sapiens GN=DDX21 PE=1 SV=5	DDX21	Q9NR30	9.28	783	87.29	5	2	1.32
Probable ubiquitin carboxyl-terminal hydrolase FAF-X OS=Homo sapiens GN=USP9X PE=1 SV=3	USP9X	Q93008	5.8	2570	292.094	32	13	1.3
Pre-mRNA-processing factor 19 OS=Homo sapiens GN=PRPF19 PE=1 SV=1	PRPF19	Q9UMS4	6.61	504	55.146	17	7	1.28
Heterogeneous nuclear ribonucleoprotein U-like protein 1 OS=Homo sapiens GN=HNRNPUL1 PE=1 SV=2	HNRNPUL1	Q9BUJ2	6.92	856	95.679	12	5	1.26
Transcription factor HIVEP2 OS=Homo sapiens GN=HIVEP2 PE=1 SV=2	HIVEP2	P31629	6.96	2446	268.885	14	6	1.22
Isoform 2 of Catenin alpha-1 OS=Homo sapiens GN=CTNNA1	CTNNA1	P35221-2	6.34	930	102.571	14	6	1.22
DNA-directed RNA polymerases I, II, and III subunit RPABC1 OS=Homo sapiens GN=POLR2E PE=1 SV=4	POLR2E	P19388	5.95	210	24.536	7	3	1.22
Nuclear pore complex protein Nup93 OS=Homo sapiens GN=NUP93 PE=1 SV=2	NUP93	Q8N1F7	5.72	819	93.43	7	3	1.22
Transcription factor A, mitochondrial OS=Homo sapiens GN=TFAM PE=1 SV=1	TFAM	Q00059	9.72	246	29.078	7	3	1.22
Serine/threonine-protein phosphatase 2A catalytic subunit alpha isoform OS=Homo sapiens GN=PPP2CA PE=1 SV=1	PPP2CA	P67775	5.54	309	35.571	7	3	1.22
Exportin-2 OS=Homo sapiens GN=CSE1L PE=1 SV=3	CSE1L	P55060	5.77	971	110.346	7	3	1.22
Proliferating cell nuclear antigen OS=Homo sapiens GN=PCNA PE=1 SV=1	PCNA	P12004	4.69	261	28.75	7	3	1.22
WD repeat-containing protein 6 OS=Homo sapiens GN=WDR6 PE=1 SV=1	WDR6	Q9NNW5	6.87	1121	121.647	7	3	1.22
Apolipoprotein A-I OS=Homo sapiens GN=APOA1 PE=1 SV=1	APOA1	F8W696	6.13	245	27.891	7	3	1.22
Guanine nucleotide-binding protein subunit beta-2-like 1 OS=Homo sapiens GN=GNB2L1 PE=1 SV=3	GNB2L1	P63244	7.69	317	35.055	9	4	1.17
Keratin, type II cytoskeletal 3 OS=Homo sapiens GN=KRT3 PE=1 SV=3	KRT3	P12035	6.48	628	64.378	9	4	1.17
HZGJ OS=Homo sapiens GN=HZGJ PE=1 SV=1	HZGJ	Q86YQ0	8.12	765	84.667	9	4	1.17
Isoform 2 of AP-2 complex subunit alpha-2 OS=Homo sapiens GN=AP2A2	AP2A2	O94973-2	6.86	940	104.024	9	4	1.17
Protein AHNAK2 OS=Homo sapiens GN=AHNAK2 PE=1 SV=2	AHNAK2	Q8IVF2	5.36	5795	616.242	110	50	1.14
Isoform 2 of Poly(rC)-binding protein 2 OS=Homo sapiens GN=PCBP2	PCBP2	Q15366-2	6.79	366	38.627	11	5	1.14
Tight junction protein 1 (Zona occludens 1), isoform CRA_a OS=Homo sapiens GN=TJP1 PE=1 SV=1	TJP1	G3V1L9	6.67	1768	197.339	11	5	1.14
Acetyl-CoA acetyltransferase, cytosolic OS=Homo sapiens GN=ACAT2 PE=1 SV=2	ACAT2	Q9BWD1	6.92	397	41.324	11	5	1.14
Isoform 4 of Plectin OS=Homo sapiens GN=PLEC	PLEC	Q15149-4	5.8	4547	515.884	152	70	1.12
Protein transport protein Sec24C OS=Homo sapiens GN=SEC24C PE=1 SV=3	SEC24C	P53992	7.06	1094	118.249	26	12	1.12
Keratin, type I cytoskeletal 17 OS=Homo sapiens GN=KRT17 PE=1 SV=2	KRT17	Q04695	5.02	432	48.076	13	6	1.12
Plectin OS=Homo sapiens GN=PLEC PE=1 SV=3	PLEC	Q15149	5.96	4684	531.466	151	71	1.09
RuvB-like 2 OS=Homo sapiens GN=RUVBL2 PE=1 SV=3	RUVBL2	Q9Y230	5.64	463	51.125	19	9	1.08
Insulin-like growth factor 2 mRNA-binding protein 3 OS=Homo sapiens GN=IGF2BP3 PE=1 SV=2	IGF2BP3	O00425	8.87	579	63.666	19	9	1.08
Poly [ADP-ribose] polymerase 1 OS=Homo sapiens GN=PARP1 PE=1 SV=4	PARP1	P09874	8.88	1014	113.012	21	10	1.07
Neuroblast differentiation-associated protein AHNAK OS=Homo sapiens GN=AHNAK PE=1 SV=2	AHNAK	Q09666	6.15	5890	628.699	363	175	1.05
Regulator of nonsense transcripts 1 OS=Homo sapiens GN=UPF1 PE=1 SV=2	UPF1	Q92900	6.61	1129	124.267	29	14	1.05
Polyadenylate-binding protein 1 OS=Homo sapiens GN=PABPC1 PE=1 SV=2	PABPC1	P11940	9.5	636	70.626	41	20	1.04
Ezrin OS=Homo sapiens GN=EZR PE=1 SV=3	EZR	E7EQR4	6.16	586	69.329	12	6	1
Alpha-2-macroglobulin OS=Homo sapiens GN=A2M PE=1 SV=3	A2M	P01023	6.46	1474	163.188	10	5	1
Ras GTPase-activating-like protein IQGAP1 OS=Homo sapiens GN=IQGAP1 PE=1 SV=1	IQGAP1	P46940	6.48	1657	189.134	10	5	1
Isoform 3 of Ataxin-2-like protein OS=Homo sapiens GN=ATXN2L	ATXN2L	Q8WWM7-3	8.66	1097	115.511	8	4	1
Eukaryotic translation initiation factor 4E type 2 OS=Homo sapiens GN=EIF4E2 PE=1 SV=1	EIF4E2	B9A023	7.03	189	21.899	8	4	1
Nucleolar protein 56 OS=Homo sapiens GN=NOP56 PE=1 SV=4	NOP56	O00567	9.19	594	66.009	8	4	1
40S ribosomal protein S8 OS=Homo sapiens GN=RPS8 PE=1 SV=2	RPS8	P62241	10.32	208	24.19	8	4	1
40S ribosomal protein S16 OS=Homo sapiens GN=RPS16 PE=1 SV=2	RPS16	P62249	10.21	146	16.435	6	3	1
Uncharacterized protein C15orf52 OS=Homo sapiens GN=C15orf52 PE=1 SV=1	C15orf52	Q6ZUT6	9.13	534	57.29	6	3	1
Heterogeneous nuclear ribonucleoprotein A0 OS=Homo sapiens GN=HNRNPA0 PE=1 SV=1	HNRNPA0	Q13151	9.29	305	30.822	6	3	1
60S ribosomal protein L8 OS=Homo sapiens GN=RPL8 PE=1 SV=2	RPL8	P62917	11.03	257	28.007	6	3	1
Septin-9 OS=Homo sapiens GN=SEPT9 PE=1 SV=2	SEPT9	Q9UHD8	8.97	586	65.361	6	3	1
BAG family molecular chaperone regulator 2 OS=Homo sapiens GN=BAG2 PE=1 SV=1	BAG2	O95816	6.7	211	23.757	6	3	1
Core histone macro-H2A.2 OS=Homo sapiens GN=H2AFY2 PE=1 SV=3	H2AFY2	Q9P0M6	9.69	372	40.033	6	3	1
CREB-binding protein OS=Homo sapiens GN=CREBBP PE=1 SV=3	CREBBP	Q92793	8.53	2442	265.182	6	3	1
Nuclear pore complex protein Nup93 OS=Homo sapiens GN=NUP93 PE=1 SV=1	NUP93	H3BVG0	5.73	880	99.492	6	3	1
Isoform 2 of Protein transport protein Sec24D OS=Homo sapiens GN=SEC24D	SEC24D	O94855-2	7.25	1033	113.007	6	3	1
Putative pre-mRNA-splicing factor ATP-dependent RNA helicase DHX15 OS=Homo sapiens GN=DHX15 PE=1 SV=2	DHX15	O43143	7.46	795	90.875	4	2	1
60S ribosomal protein L15 OS=Homo sapiens GN=RPL15 PE=1 SV=2	RPL15	P61313	11.62	204	24.131	4	2	1
40S ribosomal protein S28 OS=Homo sapiens GN=RPS28 PE=1 SV=1	RPS28	P62857	10.7	69	7.836	4	2	1
AH receptor-interacting protein OS=Homo sapiens GN=AIP PE=1 SV=2	AIP	O00170	6.29	330	37.612	4	2	1
Protein RCC2 OS=Homo sapiens GN=RCC2 PE=1 SV=2	RCC2	Q9P258	8.78	522	56.049	4	2	1
40S ribosomal protein S6 OS=Homo sapiens GN=RPS6 PE=1 SV=1	RPS6	A2A3R7	5.48	91	10.408	4	2	1
Isoform 2 of LIM and SH3 domain protein 1 OS=Homo sapiens GN=LASP1	LASP1	Q14847-2	8.62	323	35.991	4	2	1
Chromobox protein homolog 3 OS=Homo sapiens GN=CBX3 PE=1 SV=4	CBX3	Q13185	5.33	183	20.798	4	2	1
Peroxiredoxin-1 OS=Homo sapiens GN=PRDX1 PE=1 SV=1	PRDX1	A0A0A0MRQ5	8.72	97	10.67	4	2	1
Isoform 6 of Zinc finger protein 185 OS=Homo sapiens GN=ZNF185	ZNF185	O15231-6	7.05	721	76.81	4	2	1
40S ribosomal protein S11 OS=Homo sapiens GN=RPS11 PE=1 SV=3	RPS11	P62280	10.3	158	18.419	4	2	1
Mediator of DNA damage checkpoint protein 1 OS=Homo sapiens GN=MDC1 PE=1 SV=3	MDC1	Q14676	5.47	2089	226.529	4	2	1
Tumor susceptibility gene 101 protein OS=Homo sapiens GN=TSG101 PE=1 SV=2	TSG101	Q99816	6.46	390	43.916	4	2	1
Nuclear migration protein nudC OS=Homo sapiens GN=NUDC PE=1 SV=1	NUDC	Q9Y266	5.38	331	38.219	4	2	1
Isoform 4 of Double-stranded RNA-specific adenosine deaminase OS=Homo sapiens GN=ADAR	ADAR	P55265-4	8.56	1269	140.749	4	2	1
60S ribosomal protein L22 OS=Homo sapiens GN=RPL22 PE=1 SV=2	RPL22	P35268	9.19	128	14.778	4	2	1
Isoform 3 of Gamma-tubulin complex component 2 OS=Homo sapiens GN=TUBGCP2	TUBGCP2	Q9BSJ2-4	7.08	930	105.561	23	12	0.94
Heat shock protein beta-1 OS=Homo sapiens GN=HSPB1 PE=1 SV=2	HSPB1	P04792	6.4	205	22.768	19	10	0.93
Tubulin beta-4B chain OS=Homo sapiens GN=TUBB4B PE=1 SV=1	TUBB4B	P68371	4.89	445	49.799	34	18	0.92
Protein FAM83H OS=Homo sapiens GN=FAM83H PE=1 SV=3	FAM83H	Q6ZRV2	6.98	1179	127.044	24	13	0.88
Enhancer of mRNA-decapping protein 4 OS=Homo sapiens GN=EDC4 PE=1 SV=1	EDC4	Q6P2E9	5.86	1401	151.567	11	6	0.87
AP-2 complex subunit alpha-1 OS=Homo sapiens GN=AP2A1 PE=1 SV=3	AP2A1	O95782	7.03	977	107.478	11	6	0.87
Zinc finger protein 598 OS=Homo sapiens GN=ZNF598 PE=1 SV=1	ZNF598	Q86UK7	8.4	904	98.575	18	10	0.85
40S ribosomal protein S19 OS=Homo sapiens GN=RPS19 PE=1 SV=2	RPS19	P39019	10.32	145	16.051	9	5	0.85
PDZ and LIM domain protein 1 OS=Homo sapiens GN=PDLIM1 PE=1 SV=4	PDLIM1	O00151	7.02	329	36.049	9	5	0.85
T-complex protein 1 subunit delta OS=Homo sapiens GN=CCT4 PE=1 SV=4	CCT4	P50991	7.83	539	57.888	9	5	0.85
Histone H3.1 OS=Homo sapiens GN=HIST1H3A PE=1 SV=2	HIST1H3A	P68431	11.12	136	15.394	16	9	0.83
RNA-binding motif protein, X chromosome OS=Homo sapiens GN=RBMX PE=1 SV=3	RBMX	P38159	10.05	391	42.306	7	4	0.81
60S ribosomal protein L7a OS=Homo sapiens GN=RPL7A PE=1 SV=2	RPL7A	P62424	10.61	266	29.977	7	4	0.81
Nucleolar protein 58 OS=Homo sapiens GN=NOP58 PE=1 SV=1	NOP58	Q9Y2X3	8.92	529	59.541	7	4	0.81
Eukaryotic translation initiation factor 3 subunit E OS=Homo sapiens GN=EIF3E PE=1 SV=1	EIF3E	P60228	6.04	445	52.187	7	4	0.81
Isoform 2 of Centrosomal protein of 97 kDa OS=Homo sapiens GN=CEP97	CEP97	Q8IW35-2	5.08	891	99.846	7	4	0.81
Isoform 2 of Peptidyl-prolyl cis-trans isomerase A OS=Homo sapiens GN=PPIA	PPIA	P62937-2	7.9	105	11.411	19	11	0.79
Signal transducer and activator of transcription 6 OS=Homo sapiens GN=STAT6 PE=1 SV=1	STAT6	P42226	6.23	847	94.075	129	75	0.78
Splicing factor 3B subunit 3 OS=Homo sapiens GN=SF3B3 PE=1 SV=4	SF3B3	Q15393	5.26	1217	135.492	12	7	0.78
Stress-70 protein, mitochondrial OS=Homo sapiens GN=HSPA9 PE=1 SV=2	HSPA9	P38646	6.16	679	73.635	12	7	0.78
60S ribosomal protein L38 OS=Homo sapiens GN=RPL38 PE=1 SV=2	RPL38	P63173	10.1	70	8.213	22	13	0.76
Isoform 3 of Importin-5 OS=Homo sapiens GN=IPO5	IPO5	O00410-3	4.92	1115	125.464	10	6	0.74
Matrin-3 OS=Homo sapiens GN=MATR3 PE=1 SV=1	MATR3	B3KM87	5.86	509	56.701	10	6	0.74
Isoform 2 of Nesprin-2 OS=Homo sapiens GN=SYNE2	SYNE2	Q8WXH0-2	5.36	6907	798.362	5	3	0.74
Splicing factor U2AF 65 kDa subunit OS=Homo sapiens GN=U2AF2 PE=1 SV=4	U2AF2	P26368	9.09	475	53.467	5	3	0.74
60S ribosomal protein L13 OS=Homo sapiens GN=RPL13 PE=1 SV=4	RPL13	P26373	11.65	211	24.247	5	3	0.74
Gamma-tubulin complex component 6 OS=Homo sapiens GN=TUBGCP6 PE=1 SV=3	TUBGCP6	Q96RT7	6.32	1819	200.372	5	3	0.74
Probable ATP-dependent RNA helicase DDX6 OS=Homo sapiens GN=DDX6 PE=1 SV=2	DDX6	P26196	8.66	483	54.382	5	3	0.74
Pre-mRNA-processing factor 6 OS=Homo sapiens GN=PRPF6 PE=1 SV=1	PRPF6	O94906	8.25	941	106.858	5	3	0.74
DNA topoisomerase 2-beta OS=Homo sapiens GN=TOP2B PE=1 SV=3	TOP2B	Q02880	8	1626	183.152	5	3	0.74
Heterogeneous nuclear ribonucleoprotein D0 OS=Homo sapiens GN=HNRNPD PE=1 SV=1	HNRNPD	Q14103	7.81	355	38.41	5	3	0.74
Serine/arginine repetitive matrix protein 2 OS=Homo sapiens GN=SRRM2 PE=1 SV=2	SRRM2	Q9UQ35	12.06	2752	299.438	5	3	0.74
Keratin, type II cytoskeletal 78 OS=Homo sapiens GN=KRT78 PE=2 SV=2	KRT78	Q8N1N4	6.02	520	56.83	5	3	0.74
YTH domain-containing family protein 3 OS=Homo sapiens GN=YTHDF3 PE=1 SV=1	YTHDF3	A0A087X0Q1	9.04	583	63.636	5	3	0.74
Double-stranded RNA-binding protein Staufen homolog 1 OS=Homo sapiens GN=STAU1 PE=1 SV=2	STAU1	O95793	9.44	577	63.143	5	3	0.74
Protein S100-A10 OS=Homo sapiens GN=S100A10 PE=1 SV=2	S100A10	P60903	7.37	97	11.196	5	3	0.74
Pumilio homolog 1 OS=Homo sapiens GN=PUM1 PE=1 SV=1	PUM1	Q5T1Z4	6.84	1189	126.678	5	3	0.74
Keratin, type II cytoskeletal 5 OS=Homo sapiens GN=KRT5 PE=1 SV=3	KRT5	P13647	7.74	590	62.34	41	25	0.71
Keratin, type II cytoskeletal 6A OS=Homo sapiens GN=KRT6A PE=1 SV=3	KRT6A	P02538	8	564	60.008	36	22	0.71
Isoform 4 of DNA topoisomerase 2-alpha OS=Homo sapiens GN=TOP2A	TOP2A	P11388-4	8.63	1612	182.567	18	11	0.71
Serine/threonine-protein kinase SMG1 OS=Homo sapiens GN=SMG1 PE=1 SV=3	SMG1	Q96Q15	6.46	3661	410.241	13	8	0.7
Spectrin beta chain, non-erythrocytic 1 OS=Homo sapiens GN=SPTBN1 PE=1 SV=2	SPTBN1	Q01082	5.57	2364	274.439	42	26	0.69
Isoform 2 of Annexin A2 OS=Homo sapiens GN=ANXA2	ANXA2	P07355-2	8.37	357	40.386	32	20	0.68
Heterogeneous nuclear ribonucleoprotein L OS=Homo sapiens GN=HNRNPL PE=1 SV=2	HNRNPL	P14866	8.22	589	64.092	16	10	0.68
Eukaryotic translation initiation factor 3 subunit D OS=Homo sapiens GN=EIF3D PE=1 SV=1	EIF3D	O15371	6.05	548	63.932	8	5	0.68
40S ribosomal protein SA OS=Homo sapiens GN=RPSA PE=4 SV=1	RPSA	A0A0C4DG17	4.87	300	33.293	8	5	0.68
Poly(rC)-binding protein 1 OS=Homo sapiens GN=PCBP1 PE=1 SV=2	PCBP1	Q15365	7.09	356	37.474	8	5	0.68
Non-POU domain-containing octamer-binding protein OS=Homo sapiens GN=NONO PE=1 SV=4	NONO	Q15233	8.95	471	54.197	8	5	0.68
Exportin-1 OS=Homo sapiens GN=XPO1 PE=1 SV=1	XPO1	O14980	6.06	1071	123.306	8	5	0.68
Isoform 3 of Drebrin OS=Homo sapiens GN=DBN1	DBN1	Q16643-3	4.51	695	76.253	8	5	0.68
Splicing factor 3A subunit 1 OS=Homo sapiens GN=SF3A1 PE=1 SV=1	SF3A1	Q15459	5.22	793	88.831	8	5	0.68
Septin-7 OS=Homo sapiens GN=SEPT7 PE=1 SV=2	SEPT7	E7EPK1	8.63	437	50.663	8	5	0.68
PIH1 domain-containing protein 1 OS=Homo sapiens GN=PIH1D1 PE=1 SV=1	PIH1D1	Q9NWS0	5.14	290	32.342	8	5	0.68
Desmoplakin OS=Homo sapiens GN=DSP PE=1 SV=3	DSP	P15924	6.81	2871	331.569	30	19	0.66
Cofilin-1 OS=Homo sapiens GN=CFL1 PE=1 SV=1	CFL1	E9PK25	8.34	204	22.714	11	7	0.65
Far upstream element-binding protein 2 OS=Homo sapiens GN=KHSRP PE=1 SV=1	KHSRP	A0A087WTP3	7.71	711	72.982	11	7	0.65
CAD protein OS=Homo sapiens GN=CAD PE=1 SV=3	CAD	P27708	6.46	2225	242.829	34	22	0.63
Isoform 7 of Interleukin enhancer-binding factor 3 OS=Homo sapiens GN=ILF3	ILF3	Q12906-7	8.81	898	95.748	17	11	0.63
Heat shock 70 kDa protein 1A/1B OS=Homo sapiens GN=HSPA1A PE=1 SV=5	HSPA1A	P08107	5.66	641	70.009	37	24	0.62
Probable ATP-dependent RNA helicase DDX17 OS=Homo sapiens GN=DDX17 PE=1 SV=1	DDX17	H3BLZ8	8.37	731	80.389	20	13	0.62
Keratin, type I cytoskeletal 10 OS=Homo sapiens GN=KRT10 PE=1 SV=6	KRT10	P13645	5.21	584	58.792	219	146	0.58
Peptidyl-prolyl cis-trans isomerase A OS=Homo sapiens GN=PPIA PE=1 SV=2	PPIA	P62937	7.81	165	18.001	24	16	0.58
DNA-dependent protein kinase catalytic subunit OS=Homo sapiens GN=PRKDC PE=1 SV=3	PRKDC	P78527	7.12	4128	468.788	24	16	0.58
Splicing factor, proline- and glutamine-rich OS=Homo sapiens GN=SFPQ PE=1 SV=2	SFPQ	P23246	9.44	707	76.102	21	14	0.58
Isoform 5 of Ubiquitin-associated protein 2-like OS=Homo sapiens GN=UBAP2L	UBAP2L	Q14157-5	7.02	1104	116.569	18	12	0.58
Melanoma inhibitory activity protein 3 OS=Homo sapiens GN=MIA3 PE=1 SV=1	MIA3	Q5JRA6	4.84	1907	213.57	15	10	0.58
Junction plakoglobin OS=Homo sapiens GN=JUP PE=1 SV=3	JUP	P14923	6.14	745	81.693	12	8	0.58
Histone H2A type 2-B OS=Homo sapiens GN=HIST2H2AB PE=1 SV=3	HIST2H2AB	Q8IUE6	10.89	130	13.987	9	6	0.58
Serine/threonine-protein phosphatase PP1-alpha catalytic subunit OS=Homo sapiens GN=PPP1CA PE=1 SV=1	PPP1CA	P62136	6.33	330	37.488	9	6	0.58
CSNK2A1 protein OS=Homo sapiens GN=CSNK2A1 PE=1 SV=1	CSNK2A1	Q5U5J2	7.96	397	45.879	9	6	0.58
Fragile X mental retardation protein 1 OS=Homo sapiens GN=FMR1 PE=1 SV=1	FMR1	Q06787	7.42	632	71.131	9	6	0.58
Lamina-associated polypeptide 2, isoforms beta/gamma OS=Homo sapiens GN=TMPO PE=1 SV=2	TMPO	P42167	9.38	454	50.639	9	6	0.58
Isoform 2 of 40S ribosomal protein S20 OS=Homo sapiens GN=RPS20	RPS20	P60866-2	9.32	142	15.995	6	4	0.58
Ubiquitin-40S ribosomal protein S27a OS=Homo sapiens GN=RPS27A PE=1 SV=2	RPS27A	P62979	9.64	156	17.953	6	4	0.58
Eukaryotic translation initiation factor 5B OS=Homo sapiens GN=EIF5B PE=1 SV=1	EIF5B	A0A087WUT6	5.58	1220	138.597	6	4	0.58
T-complex protein 1 subunit alpha OS=Homo sapiens GN=TCP1 PE=1 SV=1	TCP1	E7EQR6	7.71	401	43.858	6	4	0.58
Ceruloplasmin OS=Homo sapiens GN=CP PE=1 SV=1	CP	P00450	5.72	1065	122.128	6	4	0.58
40S ribosomal protein S27 OS=Homo sapiens GN=RPS27L PE=1 SV=1	RPS27L	H0YMV8	9.32	100	11.338	6	4	0.58
40S ribosomal protein S27 OS=Homo sapiens GN=RPS27 PE=1 SV=3	RPS27	P42677	9.45	84	9.455	6	4	0.58
GTP-binding nuclear protein Ran (Fragment) OS=Homo sapiens GN=RAN PE=1 SV=1	RAN	J3KQE5	9.58	234	26.799	6	4	0.58
Filaggrin OS=Homo sapiens GN=FLG PE=1 SV=3	FLG	P20930	9.25	4061	434.922	6	4	0.58
26S proteasome non-ATPase regulatory subunit 2 OS=Homo sapiens GN=PSMD2 PE=1 SV=3	PSMD2	Q13200	5.2	908	100.136	6	4	0.58
40S ribosomal protein S5 OS=Homo sapiens GN=RPS5 PE=1 SV=1	RPS5	M0QZN2	8.48	134	14.754	6	4	0.58
Isoform 8 of Filamin-B OS=Homo sapiens GN=FLNB	FLNB	O75369-8	5.71	2633	281.459	70	47	0.57
Keratin, type I cytoskeletal 16 OS=Homo sapiens GN=KRT16 PE=1 SV=4	KRT16	P08779	5.05	473	51.236	37	25	0.57
Elongation factor 2 OS=Homo sapiens GN=EEF2 PE=1 SV=4	EEF2	P13639	6.83	858	95.277	37	25	0.57
ATP-dependent RNA helicase DDX1 OS=Homo sapiens GN=DDX1 PE=1 SV=2	DDX1	Q92499	7.23	740	82.38	25	17	0.56
Eukaryotic translation initiation factor 3 subunit A OS=Homo sapiens GN=EIF3A PE=1 SV=1	EIF3A	Q14152	6.79	1382	166.468	22	15	0.55
Histone H1.3 OS=Homo sapiens GN=HIST1H1D PE=1 SV=2	HIST1H1D	P16402	11.02	221	22.336	17	12	0.5
tRNA-splicing ligase RtcB homolog OS=Homo sapiens GN=RTCB PE=1 SV=1	RTCB	Q9Y3I0	7.23	505	55.175	14	10	0.49
Alpha-enolase OS=Homo sapiens GN=ENO1 PE=1 SV=2	ENO1	P06733	7.39	434	47.139	14	10	0.49
Histone H2B type 3-B OS=Homo sapiens GN=HIST3H2BB PE=1 SV=3	HIST3H2BB	Q8N257	10.32	126	13.9	14	10	0.49
Insulin-like growth factor 2 mRNA-binding protein 1 OS=Homo sapiens GN=IGF2BP1 PE=1 SV=2	IGF2BP1	Q9NZI8	9.2	577	63.441	14	10	0.49
40S ribosomal protein S18 OS=Homo sapiens GN=RPS18 PE=1 SV=3	RPS18	P62269	10.99	152	17.708	7	5	0.49
RNA-binding protein 8A OS=Homo sapiens GN=RBM8A PE=1 SV=1	RBM8A	Q9Y5S9	5.72	174	19.877	7	5	0.49
60S ribosomal protein L4 OS=Homo sapiens GN=RPL4 PE=1 SV=5	RPL4	P36578	11.06	427	47.667	7	5	0.49
Tubulin beta chain OS=Homo sapiens GN=TUBB PE=1 SV=2	TUBB	P07437	4.89	444	49.639	40	29	0.46
Pyruvate kinase PKM OS=Homo sapiens GN=PKM PE=1 SV=4	PKM	P14618	7.84	531	57.9	22	16	0.46
Tubulin gamma-1 chain OS=Homo sapiens GN=TUBG1 PE=1 SV=2	TUBG1	P23258	6.14	451	51.138	15	11	0.45
Histone H3.2 OS=Homo sapiens GN=HIST2H3A PE=1 SV=3	HIST2H3A	Q71DI3	11.27	136	15.379	15	11	0.45
Serine/threonine-protein phosphatase 2A 65 kDa regulatory subunit A alpha isoform OS=Homo sapiens GN=PPP2R1A PE=1 SV=4	PPP2R1A	P30153	5.11	589	65.267	15	11	0.45
Heterogeneous nuclear ribonucleoprotein R OS=Homo sapiens GN=HNRNPR PE=1 SV=1	HNRNPR	O43390	8.13	633	70.899	19	14	0.44
E3 ubiquitin-protein ligase TRIM21 OS=Homo sapiens GN=TRIM21 PE=1 SV=1	TRIM21	P19474	6.38	475	54.135	75	56	0.42
Glyceraldehyde-3-phosphate dehydrogenase OS=Homo sapiens GN=GAPDH PE=1 SV=3	GAPDH	P04406	8.46	335	36.03	24	18	0.42
Heterogeneous nuclear ribonucleoproteins C1/C2 OS=Homo sapiens GN=HNRNPC PE=1 SV=4	HNRNPC	P07910	5.08	306	33.65	16	12	0.42
BTB/POZ domain-containing protein KCTD20 OS=Homo sapiens GN=KCTD20 PE=1 SV=1	KCTD20	Q7Z5Y7	5.33	419	47.45	12	9	0.42
Splicing factor 3B subunit 1 OS=Homo sapiens GN=SF3B1 PE=1 SV=3	SF3B1	O75533	7.09	1304	145.738	12	9	0.42
Heterogeneous nuclear ribonucleoprotein H OS=Homo sapiens GN=HNRNPH1 PE=1 SV=1	HNRNPH1	G8JLB6	6.8	472	51.197	12	9	0.42
Isoform 2 of Serine/threonine-protein phosphatase PP1-alpha catalytic subunit OS=Homo sapiens GN=PPP1CA	PPP1CA	P62136-2	6.62	341	38.606	8	6	0.42
Galectin-1 OS=Homo sapiens GN=LGALS1 PE=1 SV=2	LGALS1	P09382	5.5	135	14.706	8	6	0.42
Cytoskeleton-associated protein 4 OS=Homo sapiens GN=CKAP4 PE=1 SV=2	CKAP4	Q07065	5.92	602	65.983	8	6	0.42
60S acidic ribosomal protein P1 OS=Homo sapiens GN=RPLP1 PE=1 SV=1	RPLP1	P05386	4.32	114	11.507	4	3	0.42
Heat shock 70 kDa protein 4 OS=Homo sapiens GN=HSPA4 PE=1 SV=4	HSPA4	P34932	5.19	840	94.271	4	3	0.42
Helicase with zinc finger domain 2 OS=Homo sapiens GN=HELZ2 PE=1 SV=6	HELZ2	Q9BYK8	7.49	2649	294.465	4	3	0.42
Hsp90 co-chaperone Cdc37 OS=Homo sapiens GN=CDC37 PE=1 SV=1	CDC37	Q16543	5.25	378	44.44	4	3	0.42
Clathrin heavy chain 1 OS=Homo sapiens GN=CLTC PE=1 SV=1	CLTC	J3QL20	8.32	97	10.61	4	3	0.42
Isoform 2 of Nck-associated protein 1 OS=Homo sapiens GN=NCKAP1	NCKAP1	Q9Y2A7-2	6.68	1134	129.433	4	3	0.42
Isoform 2 of Heterogeneous nuclear ribonucleoprotein A/B OS=Homo sapiens GN=HNRNPAB	HNRNPAB	Q99729-2	6.95	332	35.945	4	3	0.42
Transcription activator BRG1 OS=Homo sapiens GN=SMARCA4 PE=1 SV=1	SMARCA4	A0A0A0MT49	8.12	1681	188.742	4	3	0.42
Coatomer subunit beta' OS=Homo sapiens GN=COPB2 PE=1 SV=2	COPB2	P35606	5.27	906	102.422	4	3	0.42
60S ribosomal protein L24 OS=Homo sapiens GN=RPL24 PE=1 SV=1	RPL24	C9JNW5	10.78	150	17.532	4	3	0.42
Apoptotic chromatin condensation inducer in the nucleus OS=Homo sapiens GN=ACIN1 PE=1 SV=2	ACIN1	E7EQT4	6.73	1301	147.275	4	3	0.42
U1 small nuclear ribonucleoprotein 70 kDa OS=Homo sapiens GN=SNRNP70 PE=1 SV=2	SNRNP70	P08621	9.94	437	51.526	4	3	0.42
60S ribosomal protein L23 OS=Homo sapiens GN=RPL23 PE=1 SV=1	RPL23	J3KTJ3	10.14	81	8.894	4	3	0.42
Guanine nucleotide-binding protein G(I)/G(S)/G(T) subunit beta-1 OS=Homo sapiens GN=GNB1 PE=1 SV=3	GNB1	P62873	6	340	37.353	4	3	0.42
Flotillin-2 OS=Homo sapiens GN=FLOT2 PE=1 SV=1	FLOT2	E7EMK3	5.24	483	53.104	4	3	0.42
Nuclear mitotic apparatus protein 1 OS=Homo sapiens GN=NUMA1 PE=1 SV=2	NUMA1	Q14980	5.78	2115	238.115	41	31	0.4
Protein transport protein Sec16A OS=Homo sapiens GN=SEC16A PE=1 SV=1	SEC16A	J3KNL6	5.8	2357	251.738	281	215	0.39
Keratin, type I cytoskeletal 9 OS=Homo sapiens GN=KRT9 PE=1 SV=3	KRT9	P35527	5.24	623	62.027	201	153	0.39
PDZ and LIM domain protein 7 OS=Homo sapiens GN=PDLIM7 PE=1 SV=1	PDLIM7	Q9NR12	8.41	457	49.813	13	10	0.38
Isoform C of Prelamin-A/C OS=Homo sapiens GN=LMNA	LMNA	P02545-2	6.84	572	65.096	40	31	0.37
Keratin, type I cytoskeletal 14 OS=Homo sapiens GN=KRT14 PE=1 SV=4	KRT14	P02533	5.16	472	51.529	35	27	0.37
Keratin, type II cytoskeletal 2 epidermal OS=Homo sapiens GN=KRT2 PE=1 SV=2	KRT2	P35908	8	639	65.393	137	107	0.36
Heat shock 70 kDa protein 1-like OS=Homo sapiens GN=HSPA1L PE=1 SV=2	HSPA1L	P34931	6.02	641	70.331	18	14	0.36
Isoform 6 of Serine/threonine-protein kinase MRCK alpha OS=Homo sapiens GN=CDC42BPA	CDC42BPA	Q5VT25-6	6.51	1781	202.684	18	14	0.36
Isoform 2 of Serine/threonine-protein kinase MRCK alpha OS=Homo sapiens GN=CDC42BPA	CDC42BPA	Q5VT25-2	6.44	1754	199.685	18	14	0.36
40S ribosomal protein S7 OS=Homo sapiens GN=RPS7 PE=1 SV=1	RPS7	B5MCP9	10.27	187	21.299	9	7	0.36
Isoform 7 of Fragile X mental retardation protein 1 OS=Homo sapiens GN=FMR1	FMR1	Q06787-7	7.23	615	69.137	9	7	0.36
Transportin-1 OS=Homo sapiens GN=TNPO1 PE=1 SV=2	TNPO1	Q92973	4.98	898	102.289	9	7	0.36
Unconventional prefoldin RPB5 interactor 1 OS=Homo sapiens GN=URI1 PE=1 SV=3	URI1	O94763	5.05	535	59.796	14	11	0.35
Keratin, type II cytoskeletal 1 OS=Homo sapiens GN=KRT1 PE=1 SV=6	KRT1	P04264	8.12	644	65.999	187	148	0.34
Heterogeneous nuclear ribonucleoprotein A1 OS=Homo sapiens GN=HNRNPA1 PE=1 SV=5	HNRNPA1	P09651	9.13	372	38.723	33	26	0.34
RuvB-like 1 OS=Homo sapiens GN=RUVBL1 PE=1 SV=1	RUVBL1	Q9Y265	6.42	456	50.196	24	19	0.34
General vesicular transport factor p115 OS=Homo sapiens GN=USO1 PE=1 SV=2	USO1	O60763	4.91	962	107.828	44	35	0.33
Nuclease-sensitive element-binding protein 1 OS=Homo sapiens GN=YBX1 PE=1 SV=3	YBX1	P67809	9.88	324	35.903	29	23	0.33
Isoform 3 of Heterogeneous nuclear ribonucleoprotein K OS=Homo sapiens GN=HNRNPK	HNRNPK	P61978-3	5.54	440	48.532	40	32	0.32
Heat shock-related 70 kDa protein 2 OS=Homo sapiens GN=HSPA2 PE=1 SV=1	HSPA2	P54652	5.74	639	69.978	25	20	0.32
Keratin, type I cytoskeletal 27 OS=Homo sapiens GN=KRT27 PE=1 SV=2	KRT27	Q7Z3Y8	5.05	459	49.792	10	8	0.32
Histone H3.3 OS=Homo sapiens GN=H3F3A PE=1 SV=2	H3F3A	P84243	11.27	136	15.319	10	8	0.32
Ras GTPase-activating protein-binding protein 2 OS=Homo sapiens GN=G3BP2 PE=1 SV=2	G3BP2	Q9UN86	5.55	482	54.088	10	8	0.32
Heterogeneous nuclear ribonucleoprotein F OS=Homo sapiens GN=HNRNPF PE=1 SV=3	HNRNPF	P52597	5.58	415	45.643	10	8	0.32
60S ribosomal protein L6 OS=Homo sapiens GN=RPL6 PE=1 SV=3	RPL6	Q02878	10.58	288	32.708	10	8	0.32
Serine/arginine-rich splicing factor 3 OS=Homo sapiens GN=SRSF3 PE=1 SV=1	SRSF3	P84103	11.65	164	19.318	5	4	0.32
60S ribosomal protein L9 OS=Homo sapiens GN=RPL9 PE=1 SV=1	RPL9	P32969	9.95	192	21.85	5	4	0.32
182 kDa tankyrase-1-binding protein OS=Homo sapiens GN=TNKS1BP1 PE=1 SV=4	TNKS1BP1	Q9C0C2	4.86	1729	181.685	5	4	0.32
UPF0568 protein C14orf166 OS=Homo sapiens GN=C14orf166 PE=1 SV=1	C14orf166	G3V4C6	6.9	193	22.689	5	4	0.32
Histone-binding protein RBBP4 OS=Homo sapiens GN=RBBP4 PE=1 SV=3	RBBP4	Q09028	4.89	425	47.626	5	4	0.32
60S ribosomal protein L12 OS=Homo sapiens GN=RPL12 PE=1 SV=1	RPL12	P30050	9.42	165	17.808	5	4	0.32
Ribosome-binding protein 1 OS=Homo sapiens GN=RRBP1 PE=1 SV=4	RRBP1	Q9P2E9	8.6	1410	152.381	5	4	0.32
Eukaryotic initiation factor 4A-III OS=Homo sapiens GN=EIF4A3 PE=1 SV=4	EIF4A3	P38919	6.73	411	46.841	16	13	0.3
14-3-3 protein beta/alpha OS=Homo sapiens GN=YWHAB PE=1 SV=3	YWHAB	P31946	4.83	246	28.065	16	13	0.3
Histone H2B type 1-J OS=Homo sapiens GN=HIST1H2BJ PE=1 SV=3	HIST1H2BJ	P06899	10.32	126	13.896	16	13	0.3
Heterogeneous nuclear ribonucleoproteins A2/B1 OS=Homo sapiens GN=HNRNPA2B1 PE=1 SV=2	HNRNPA2B1	P22626	8.95	353	37.407	33	27	0.29
T-complex protein 1 subunit beta OS=Homo sapiens GN=CCT2 PE=1 SV=4	CCT2	P78371	6.46	535	57.452	11	9	0.29
Protein transport protein Sec24A OS=Homo sapiens GN=SEC24A PE=1 SV=2	SEC24A	O95486	7.66	1093	119.674	11	9	0.29
Filamin-A OS=Homo sapiens GN=FLNA PE=1 SV=4	FLNA	P21333	6.06	2647	280.564	80	66	0.28
Isoform 2 of Heterogeneous nuclear ribonucleoprotein K OS=Homo sapiens GN=HNRNPK	HNRNPK	P61978-2	5.33	464	50.996	40	33	0.28
Hornerin OS=Homo sapiens GN=HRNR PE=1 SV=2	HRNR	Q86YZ3	10.04	2850	282.228	28	23	0.28
Elongation factor 1-alpha 1 OS=Homo sapiens GN=EEF1A1 PE=1 SV=1	EEF1A1	P68104	9.01	462	50.109	23	19	0.28
Histone H1.2 OS=Homo sapiens GN=HIST1H1C PE=1 SV=2	HIST1H1C	P16403	10.93	213	21.352	17	14	0.28
Isoform 3 of Polypyrimidine tract-binding protein 1 OS=Homo sapiens GN=PTBP1	PTBP1	P26599-3	9.16	557	59.596	29	24	0.27
Core histone macro-H2A.1 OS=Homo sapiens GN=H2AFY PE=1 SV=4	H2AFY	O75367	9.79	372	39.592	12	10	0.26
Interleukin enhancer-binding factor 2 OS=Homo sapiens GN=ILF2 PE=1 SV=2	ILF2	Q12905	5.26	390	43.035	12	10	0.26
Plasminogen activator inhibitor 1 RNA-binding protein OS=Homo sapiens GN=SERBP1 PE=1 SV=2	SERBP1	Q8NC51	8.65	408	44.938	6	5	0.26
TAR DNA-binding protein 43 OS=Homo sapiens GN=TARDBP PE=1 SV=1	TARDBP	Q13148	6.19	414	44.711	6	5	0.26
Eukaryotic translation initiation factor 3 subunit H OS=Homo sapiens GN=EIF3S3 PE=1 SV=1	EIF3S3	B3KS98	7.33	366	41.555	6	5	0.26
40S ribosomal protein S13 OS=Homo sapiens GN=RPS13 PE=1 SV=2	RPS13	P62277	10.54	151	17.212	6	5	0.26
Eukaryotic translation initiation factor 6 OS=Homo sapiens GN=EIF6 PE=1 SV=1	EIF6	P56537	4.68	245	26.582	6	5	0.26
FACT complex subunit SPT16 OS=Homo sapiens GN=SUPT16H PE=1 SV=1	SUPT16H	Q9Y5B9	5.66	1047	119.838	6	5	0.26
Isoform 3 of L-lactate dehydrogenase A chain OS=Homo sapiens GN=LDHA	LDHA	P00338-3	8.43	361	39.812	6	5	0.26
Lamin B2, isoform CRA_a OS=Homo sapiens GN=LMNB2 PE=1 SV=1	LMNB2	J9JID7	5.59	620	69.906	19	16	0.25
ATP-dependent RNA helicase A OS=Homo sapiens GN=DHX9 PE=1 SV=4	DHX9	Q08211	6.84	1270	140.869	13	11	0.24
Prelamin-A/C OS=Homo sapiens GN=LMNA PE=1 SV=1	LMNA	Q5TCI8	7.02	491	55.729	34	29	0.23
Lamin-B1 OS=Homo sapiens GN=LMNB1 PE=1 SV=2	LMNB1	P20700	5.16	586	66.368	27	23	0.23
Filamin-C OS=Homo sapiens GN=FLNC PE=1 SV=3	FLNC	Q14315	5.97	2725	290.841	27	23	0.23
Eukaryotic translation initiation factor 3 subunit L OS=Homo sapiens GN=EIF3L PE=1 SV=1	EIF3L	B0QY89	6.65	607	70.857	14	12	0.22
Nucleolin OS=Homo sapiens GN=NCL PE=1 SV=3	NCL	P19338	4.7	710	76.568	14	12	0.22
Serpin H1 OS=Homo sapiens GN=SERPINH1 PE=1 SV=2	SERPINH1	P50454	8.69	418	46.411	7	6	0.22
Serine/threonine-protein kinase TBK1 OS=Homo sapiens GN=TBK1 PE=1 SV=1	TBK1	Q9UHD2	6.79	729	83.589	7	6	0.22
Histone H1.0 OS=Homo sapiens GN=H1F0 PE=1 SV=3	H1F0	P07305	10.84	194	20.85	7	6	0.22
Lamina-associated polypeptide 2, isoform alpha OS=Homo sapiens GN=TMPO PE=1 SV=2	TMPO	P42166	7.66	694	75.446	7	6	0.22
ATP-citrate synthase OS=Homo sapiens GN=ACLY PE=1 SV=3	ACLY	P53396	7.33	1101	120.762	7	6	0.22
Isoform 2 of Serine-threonine kinase receptor-associated protein OS=Homo sapiens GN=STRAP	STRAP	Q9Y3F4-2	5.31	363	39.753	7	6	0.22
KH domain-containing, RNA-binding, signal transduction-associated protein 1 OS=Homo sapiens GN=KHDRBS1 PE=1 SV=1	KHDRBS1	Q07666	8.66	443	48.197	7	6	0.22
Heat shock protein HSP 90-beta OS=Homo sapiens GN=HSP90AB1 PE=1 SV=4	HSP90AB1	P08238	5.03	724	83.212	30	26	0.21
Insulin-like growth factor 2 mRNA-binding protein 2 OS=Homo sapiens GN=IGF2BP2 PE=1 SV=1	IGF2BP2	F8W930	8.46	605	66.745	15	13	0.21
U5 small nuclear ribonucleoprotein 200 kDa helicase OS=Homo sapiens GN=SNRNP200 PE=1 SV=2	SNRNP200	O75643	6.06	2136	244.353	23	20	0.2
Importin subunit beta-1 OS=Homo sapiens GN=KPNB1 PE=1 SV=2	KPNB1	Q14974	4.78	876	97.108	24	21	0.19
Fatty acid synthase OS=Homo sapiens GN=FASN PE=1 SV=3	FASN	P49327	6.44	2511	273.254	16	14	0.19
Fragile X mental retardation syndrome-related protein 1 OS=Homo sapiens GN=FXR1 PE=1 SV=3	FXR1	P51114	6.15	621	69.678	16	14	0.19
40S ribosomal protein S3 OS=Homo sapiens GN=RPS3 PE=1 SV=2	RPS3	P23396	9.66	243	26.671	8	7	0.19
Protein mago nashi homolog OS=Homo sapiens GN=MAGOH PE=1 SV=1	MAGOH	P61326	6.11	146	17.153	8	7	0.19
Isoform 2 of AP-2 complex subunit beta OS=Homo sapiens GN=AP2B1	AP2B1	P63010-2	5.34	951	105.625	8	7	0.19
Keratin, type II cytoskeletal 6B OS=Homo sapiens GN=KRT6B PE=1 SV=5	KRT6B	P04259	8	564	60.03	42	37	0.18
Isoform 3 of Spectrin alpha chain, non-erythrocytic 1 OS=Homo sapiens GN=SPTAN1	SPTAN1	Q13813-3	5.34	2452	282.108	35	31	0.18
Serum albumin OS=Homo sapiens GN=ALB PE=1 SV=2	ALB	P02768	6.28	609	69.321	34	30	0.18
ATP-dependent RNA helicase DDX3X OS=Homo sapiens GN=DDX3X PE=1 SV=3	DDX3X	O00571	7.18	662	73.198	17	15	0.18
Pre-mRNA-processing-splicing factor 8 OS=Homo sapiens GN=PRPF8 PE=1 SV=2	PRPF8	Q6P2Q9	8.84	2335	273.427	18	16	0.17
Histone 1, H2bn, isoform CRA_b OS=Homo sapiens GN=HIST1H2BN PE=1 SV=1	HIST1H2BN	U3KQK0	10.54	166	18.792	18	16	0.17
Histone H2A.Z OS=Homo sapiens GN=H2AFZ PE=1 SV=2	H2AFZ	P0C0S5	10.58	128	13.545	9	8	0.17
Myosin light polypeptide 6 OS=Homo sapiens GN=MYL6 PE=1 SV=1	MYL6	J3KND3	4.65	152	17.047	9	8	0.17
Transcriptional activator protein Pur-beta OS=Homo sapiens GN=PURB PE=1 SV=3	PURB	Q96QR8	5.43	312	33.22	9	8	0.17
T-complex protein 1 subunit theta OS=Homo sapiens GN=CCT8 PE=1 SV=4	CCT8	P50990	5.6	548	59.583	9	8	0.17
Y-box-binding protein 3 OS=Homo sapiens GN=YBX3 PE=1 SV=4	YBX3	P16989	9.77	372	40.066	19	17	0.16
Vimentin OS=Homo sapiens GN=VIM PE=1 SV=4	VIM	P08670	5.12	466	53.619	297	268	0.15
Eukaryotic translation initiation factor 3 subunit C-like protein OS=Homo sapiens GN=EIF3CL PE=3 SV=1	EIF3CL	B5ME19	5.64	914	105.407	10	9	0.15
Heat shock cognate 71 kDa protein OS=Homo sapiens GN=HSPA8 PE=1 SV=1	HSPA8	P11142	5.52	646	70.854	54	49	0.14
Nucleophosmin OS=Homo sapiens GN=NPM1 PE=1 SV=2	NPM1	P06748	4.78	294	32.555	30	28	0.1
Beta-actin-like protein 2 OS=Homo sapiens GN=ACTBL2 PE=1 SV=2	ACTBL2	Q562R1	5.59	376	41.976	17	16	0.09
Isoform 2 of Heat shock protein HSP 90-alpha OS=Homo sapiens GN=HSP90AA1	HSP90AA1	P07900-2	5.16	854	98.099	19	18	0.08
Tubulin alpha-1B chain OS=Homo sapiens GN=TUBA1B PE=1 SV=1	TUBA1B	P68363	5.06	451	50.12	44	42	0.07
Tubulin alpha-1C chain OS=Homo sapiens GN=TUBA1C PE=1 SV=1	TUBA1C	Q9BQE3	5.1	449	49.863	43	41	0.07
X-ray repair cross-complementing protein 6 OS=Homo sapiens GN=XRCC6 PE=1 SV=2	XRCC6	P12956	6.64	609	69.799	25	24	0.06
Calponin-1 OS=Homo sapiens GN=CNN1 PE=1 SV=2	CNN1	P51911	9.07	297	33.15	24	23	0.06
Actin, alpha cardiac muscle 1 OS=Homo sapiens GN=ACTC1 PE=1 SV=1	ACTC1	P68032	5.39	377	41.992	31	30	0.05
Histone H4 OS=Homo sapiens GN=HIST1H4A PE=1 SV=2	HIST1H4A	P62805	11.36	103	11.36	38	38	0
Heterogeneous nuclear ribonucleoprotein Q OS=Homo sapiens GN=SYNCRIP PE=1 SV=2	SYNCRIP	O60506	8.59	623	69.56	23	23	0
X-ray repair cross-complementing protein 5 OS=Homo sapiens GN=XRCC5 PE=1 SV=3	XRCC5	P13010	5.81	732	82.652	18	18	0
Histone H1.5 OS=Homo sapiens GN=HIST1H1B PE=1 SV=3	HIST1H1B	P16401	10.92	226	22.566	15	15	0
116 kDa U5 small nuclear ribonucleoprotein component OS=Homo sapiens GN=EFTUD2 PE=1 SV=1	EFTUD2	Q15029	5	972	109.366	14	14	0
Isoform 2 of Heterogeneous nuclear ribonucleoprotein A3 OS=Homo sapiens GN=HNRNPA3	HNRNPA3	P51991-2	8.31	356	37.006	12	12	0
Isoform 4 of LIM domain and actin-binding protein 1 OS=Homo sapiens GN=LIMA1	LIMA1	Q9UHB6-4	6.76	760	85.171	11	11	0
Complement C3 OS=Homo sapiens GN=C3 PE=1 SV=2	C3	P01024	6.4	1663	187.03	9	9	0
Polymerase I and transcript release factor OS=Homo sapiens GN=PTRF PE=1 SV=1	PTRF	Q6NZI2	5.6	390	43.45	9	9	0
Moesin OS=Homo sapiens GN=MSN PE=1 SV=3	MSN	P26038	6.4	577	67.778	9	9	0
14-3-3 protein eta OS=Homo sapiens GN=YWHAH PE=1 SV=4	YWHAH	Q04917	4.84	246	28.201	8	8	0
Isoform 2 of Myb-binding protein 1A OS=Homo sapiens GN=MYBBP1A	MYBBP1A	Q9BQG0-2	9.28	1332	149.274	8	8	0
Protein transport protein Sec23B OS=Homo sapiens GN=SEC23B PE=1 SV=2	SEC23B	Q15437	6.89	767	86.424	8	8	0
Isoform 2 of Chromodomain-helicase-DNA-binding protein 4 OS=Homo sapiens GN=CHD4	CHD4	Q14839-2	5.97	1940	220.709	7	7	0
Guanine nucleotide-binding protein G(s) subunit alpha isoforms XLas OS=Homo sapiens GN=GNAS PE=1 SV=2	GNAS	Q5JWF2	5.03	1037	110.956	7	7	0
Far upstream element-binding protein 3 OS=Homo sapiens GN=FUBP3 PE=1 SV=2	FUBP3	Q96I24	8.38	572	61.602	7	7	0
Protein mago nashi homolog 2 OS=Homo sapiens GN=MAGOHB PE=1 SV=1	MAGOHB	Q96A72	6.39	148	17.265	7	7	0
Mitogen-activated protein kinase kinase kinase kinase 5 OS=Homo sapiens GN=MAP4K5 PE=1 SV=1	MAP4K5	Q9Y4K4	7.64	846	94.979	6	6	0
DnaJ homolog subfamily A member 1 OS=Homo sapiens GN=DNAJA1 PE=1 SV=2	DNAJA1	P31689	7.08	397	44.839	6	6	0
40S ribosomal protein S5 OS=Homo sapiens GN=RPS5 PE=1 SV=4	RPS5	P46782	9.72	204	22.862	6	6	0
Ig gamma-2 chain C region OS=Homo sapiens GN=IGHG2 PE=1 SV=2	IGHG2	P01859	7.59	326	35.878	6	6	0
Isoform 3 of Coronin-1C OS=Homo sapiens GN=CORO1C	CORO1C	Q9ULV4-3	7.75	527	58.91	6	6	0
Coiled-coil domain-containing protein 9 OS=Homo sapiens GN=CCDC9 PE=1 SV=1	CCDC9	Q9Y3X0	5.4	531	59.667	6	6	0
Putative adenosylhomocysteinase 2 OS=Homo sapiens GN=AHCYL1 PE=1 SV=2	AHCYL1	O43865	6.89	530	58.913	6	6	0
Protein FAM98A OS=Homo sapiens GN=FAM98A PE=1 SV=1	FAM98A	E9PH82	8.28	312	34.409	6	6	0
Splicing factor 3A subunit 3 OS=Homo sapiens GN=SF3A3 PE=1 SV=1	SF3A3	Q12874	5.38	501	58.812	5	5	0
Caldesmon OS=Homo sapiens GN=CALD1 PE=1 SV=3	CALD1	Q05682	5.66	793	93.175	5	5	0
Isoform 2 of ELAV-like protein 1 OS=Homo sapiens GN=ELAVL1	ELAVL1	Q15717-2	9.45	353	38.972	5	5	0
Isoform 4 of Acetyl-CoA carboxylase 1 OS=Homo sapiens GN=ACACA	ACACA	Q13085-4	6.52	2383	269.827	5	5	0
Isoform 2 of Tropomyosin alpha-3 chain OS=Homo sapiens GN=TPM3	TPM3	P06753-2	4.78	248	29.015	5	5	0
40S ribosomal protein S3a OS=Homo sapiens GN=RPS3A PE=1 SV=2	RPS3A	P61247	9.73	264	29.926	5	5	0
Signal transducer and activator of transcription 3 OS=Homo sapiens GN=STAT3 PE=1 SV=2	STAT3	P40763	6.3	770	88.011	4	4	0
Peroxiredoxin-2 OS=Homo sapiens GN=PRDX2 PE=1 SV=5	PRDX2	P32119	5.97	198	21.878	4	4	0
Centrosomal protein of 170 kDa OS=Homo sapiens GN=CEP170 PE=1 SV=1	CEP170	Q5SW79	7.11	1584	175.187	4	4	0
Isoform 3 of Heterogeneous nuclear ribonucleoprotein A/B OS=Homo sapiens GN=HNRNPAB	HNRNPAB	Q99729-3	7.91	285	30.569	4	4	0
Kinesin-1 heavy chain OS=Homo sapiens GN=KIF5B PE=1 SV=1	KIF5B	P33176	6.51	963	109.617	4	4	0
Transcriptional activator protein Pur-alpha OS=Homo sapiens GN=PURA PE=1 SV=2	PURA	Q00577	6.44	322	34.889	4	4	0
Pre-mRNA-processing factor 40 homolog A OS=Homo sapiens GN=PRPF40A PE=1 SV=2	PRPF40A	O75400	7.56	957	108.737	4	4	0
Inosine-5'-monophosphate dehydrogenase 2 OS=Homo sapiens GN=IMPDH2 PE=1 SV=2	IMPDH2	P12268	6.9	514	55.77	4	4	0
Eukaryotic translation initiation factor 3 subunit G OS=Homo sapiens GN=EIF3G PE=1 SV=2	EIF3G	O75821	6.13	320	35.589	4	4	0
Histone H1.1 OS=Homo sapiens GN=HIST1H1A PE=1 SV=3	HIST1H1A	Q02539	10.99	215	21.829	4	4	0
Treslin OS=Homo sapiens GN=TICRR PE=1 SV=2	TICRR	Q7Z2Z1	8.78	1910	210.725	4	4	0
Alpha-actinin-4 OS=Homo sapiens GN=ACTN4 PE=1 SV=2	ACTN4	O43707	5.44	911	104.788	105	107	-0.03
Actin, aortic smooth muscle OS=Homo sapiens GN=ACTA2 PE=1 SV=1	ACTA2	P62736	5.39	377	41.982	29	30	-0.05
Nuclear factor of activated T-cells 5 OS=Homo sapiens GN=NFAT5 PE=1 SV=1	NFAT5	O94916	5.24	1531	165.66	60	64	-0.09
Protein transport protein Sec23A OS=Homo sapiens GN=SEC23A PE=1 SV=2	SEC23A	Q15436	7.08	765	86.105	32	34	-0.09
Protein SEC13 homolog OS=Homo sapiens GN=SEC13 PE=1 SV=3	SEC13	P55735	5.48	322	35.518	29	31	-0.1
14-3-3 protein gamma OS=Homo sapiens GN=YWHAG PE=1 SV=2	YWHAG	P61981	4.89	247	28.285	14	15	-0.1
Isoform E of Nuclear factor of activated T-cells 5 OS=Homo sapiens GN=NFAT5	NFAT5	O94916-5	5.3	1549	167.703	59	64	-0.12
Isoform 15 of Fibronectin OS=Homo sapiens GN=FN1	FN1	P02751-15	5.5	2477	272.15	23	25	-0.12
14-3-3 protein theta OS=Homo sapiens GN=YWHAQ PE=1 SV=1	YWHAQ	P27348	4.78	245	27.747	12	13	-0.12
Probable ATP-dependent RNA helicase DDX5 OS=Homo sapiens GN=DDX5 PE=1 SV=1	DDX5	P17844	8.92	614	69.105	12	13	-0.12
LIM domain and actin-binding protein 1 OS=Homo sapiens GN=LIMA1 PE=1 SV=1	LIMA1	Q9UHB6	6.84	759	85.173	10	11	-0.14
Unconventional myosin-Ic OS=Homo sapiens GN=MYO1C PE=1 SV=4	MYO1C	O00159	9.41	1063	121.606	10	11	-0.14
Isoform 3 of Protein SEC13 homolog OS=Homo sapiens GN=SEC13	SEC13	P55735-3	5.85	368	40.721	28	31	-0.15
Isoform D of Nuclear factor of activated T-cells 5 OS=Homo sapiens GN=NFAT5	NFAT5	O94916-4	5.3	1548	167.632	57	64	-0.17
Vinculin OS=Homo sapiens GN=VCL PE=1 SV=4	VCL	P18206	5.66	1134	123.722	16	18	-0.17
Caveolin-1 OS=Homo sapiens GN=CAV1 PE=1 SV=4	CAV1	Q03135	6.02	178	20.458	8	9	-0.17
40S ribosomal protein S9 OS=Homo sapiens GN=RPS9 PE=1 SV=3	RPS9	P46781	10.65	194	22.578	8	9	-0.17
Isoform 4 of Cold shock domain-containing protein E1 OS=Homo sapiens GN=CSDE1	CSDE1	O75534-4	6.52	844	93.683	7	8	-0.19
Cytoplasmic dynein 1 heavy chain 1 OS=Homo sapiens GN=DYNC1H1 PE=1 SV=5	DYNC1H1	Q14204	6.4	4646	532.072	7	8	-0.19
Nucleoprotein TPR OS=Homo sapiens GN=TPR PE=1 SV=3	TPR	P12270	5.02	2363	267.131	7	8	-0.19
Heterogeneous nuclear ribonucleoprotein U OS=Homo sapiens GN=HNRNPU PE=1 SV=6	HNRNPU	Q00839	6	825	90.528	19	22	-0.21
Heterogeneous nuclear ribonucleoprotein A3 OS=Homo sapiens GN=HNRNPA3 PE=1 SV=2	HNRNPA3	P51991	9.01	378	39.571	13	15	-0.21
Myosin-9 OS=Homo sapiens GN=MYH9 PE=1 SV=4	MYH9	P35579	5.6	1960	226.392	118	137	-0.22
Actin, cytoplasmic 1 OS=Homo sapiens GN=ACTB PE=1 SV=1	ACTB	P60709	5.48	375	41.71	87	101	-0.22
Talin-1 OS=Homo sapiens GN=TLN1 PE=1 SV=3	TLN1	Q9Y490	6.07	2541	269.599	37	43	-0.22
Profilin-1 OS=Homo sapiens GN=PFN1 PE=1 SV=2	PFN1	P07737	8.27	140	15.045	6	7	-0.22
Protein RPL17-C18orf32 OS=Homo sapiens GN=RPL17-C18orf32 PE=1 SV=1	RPL17	A0A0A6YYL6	10.1	228	26.356	6	7	-0.22
40S ribosomal protein S2 OS=Homo sapiens GN=RPS2 PE=1 SV=2	RPS2	P15880	10.24	293	31.305	6	7	-0.22
Isoform 2 of Septin-2 OS=Homo sapiens GN=SEPT2	SEPT2	Q15019-2	6.89	396	45.432	6	7	-0.22
Histone H2A type 1-B/E OS=Homo sapiens GN=HIST1H2AB PE=1 SV=2	HIST1H2AB	P04908	11.05	130	14.127	35	41	-0.23
Isoform Short of Heterogeneous nuclear ribonucleoprotein U OS=Homo sapiens GN=HNRNPU	HNRNPU	Q00839-2	5.78	806	88.924	17	20	-0.23
Adenosylhomocysteinase OS=Homo sapiens GN=AHCY PE=1 SV=4	AHCY	P23526	6.34	432	47.685	5	6	-0.26
Isoform 4 of Caldesmon OS=Homo sapiens GN=CALD1	CALD1	Q05682-4	6.37	538	62.626	5	6	-0.26
ATP synthase subunit beta, mitochondrial OS=Homo sapiens GN=ATP5B PE=1 SV=3	ATP5B	P06576	5.4	529	56.525	5	6	-0.26
PERQ amino acid-rich with GYF domain-containing protein 1 OS=Homo sapiens GN=GIGYF1 PE=1 SV=2	GIGYF1	O75420	5.39	1035	114.531	5	6	-0.26
Staphylococcal nuclease domain-containing protein 1 OS=Homo sapiens GN=SND1 PE=1 SV=1	SND1	Q7KZF4	7.17	910	101.934	5	6	-0.26
Tropomyosin 1 (Alpha), isoform CRA_f OS=Homo sapiens GN=TPM1 PE=1 SV=1	TPM1	Q6ZN40	4.72	326	37.43	5	6	-0.26
Histone H2A type 2-A OS=Homo sapiens GN=HIST2H2AA3 PE=1 SV=3	HIST2H2AA3	Q6FI13	10.9	130	14.087	35	43	-0.3
78 kDa glucose-regulated protein OS=Homo sapiens GN=HSPA5 PE=1 SV=2	HSPA5	P11021	5.16	654	72.288	17	21	-0.3
Eukaryotic translation initiation factor 3 subunit F OS=Homo sapiens GN=EIF3F PE=1 SV=1	EIF3F	O00303	5.45	357	37.54	8	10	-0.32
60S ribosomal protein L10a OS=Homo sapiens GN=RPL10A PE=1 SV=2	RPL10A	P62906	9.94	217	24.816	4	5	-0.32
T-complex protein 1 subunit epsilon OS=Homo sapiens GN=CCT5 PE=1 SV=1	CCT5	P48643	5.66	541	59.633	4	5	-0.32
Cellular tumor antigen p53 OS=Homo sapiens GN=TP53 PE=1 SV=4	TP53	P04637	6.79	393	43.625	4	5	-0.32
Importin subunit alpha-1 OS=Homo sapiens GN=KPNA2 PE=1 SV=1	KPNA2	P52292	5.4	529	57.826	4	5	-0.32
Kinesin-like protein KIF23 OS=Homo sapiens GN=KIF23 PE=1 SV=3	KIF23	Q02241	8.51	960	109.99	4	5	-0.32
Flotillin-1 OS=Homo sapiens GN=FLOT1 PE=1 SV=3	FLOT1	O75955	7.49	427	47.326	4	5	-0.32
Alpha-actinin-1 OS=Homo sapiens GN=ACTN1 PE=1 SV=1	ACTN1	H9KV75	5.69	822	94.766	90	113	-0.33
40S ribosomal protein S17-like OS=Homo sapiens GN=RPS17L PE=1 SV=1	RPS17L	P0CW22	9.85	135	15.54	7	9	-0.36
Calmodulin OS=Homo sapiens GN=CALM2 PE=1 SV=1	CALM2	E7EMB3	4.56	196	21.675	7	9	-0.36
Alpha-actinin-1 OS=Homo sapiens GN=ACTN1 PE=1 SV=2	ACTN1	P12814	5.41	892	102.993	103	134	-0.38
Myosin regulatory light chain 12A OS=Homo sapiens GN=MYL12A PE=1 SV=1	MYL12A	J3QRS3	4.75	177	20.444	9	12	-0.42
Isoform 2 of Eukaryotic translation initiation factor 3 subunit B OS=Homo sapiens GN=EIF3B	EIF3B	P55884-2	5.08	873	98.967	6	8	-0.42
60S acidic ribosomal protein P2 OS=Homo sapiens GN=RPLP2 PE=1 SV=1	RPLP2	P05387	4.54	115	11.658	6	8	-0.42
Isoform 6 of Calcium/calmodulin-dependent protein kinase type II subunit gamma OS=Homo sapiens GN=CAMK2G	CAMK2G	Q13555-6	7.94	588	65.201	6	8	-0.42
14-3-3 protein zeta/delta OS=Homo sapiens GN=YWHAZ PE=1 SV=1	YWHAZ	B7Z2E6	4.41	125	13.977	11	15	-0.45
Cysteine and glycine-rich protein 1 OS=Homo sapiens GN=CSRP1 PE=1 SV=3	CSRP1	P21291	8.57	193	20.554	8	11	-0.46
Isoform sGi2 of Guanine nucleotide-binding protein G(i) subunit alpha-2 OS=Homo sapiens GN=GNAI2	GNAI2	P04899-4	5.99	366	41.522	5	7	-0.49
Nuclear factor NF-kappa-B p100 subunit OS=Homo sapiens GN=NFKB2 PE=1 SV=4	NFKB2	Q00653	6.25	900	96.689	5	7	-0.49
14-3-3 protein sigma OS=Homo sapiens GN=SFN PE=1 SV=1	SFN	P31947	4.74	248	27.757	5	7	-0.49
Transitional endoplasmic reticulum ATPase OS=Homo sapiens GN=VCP PE=1 SV=4	VCP	P55072	5.26	806	89.266	7	10	-0.51
Myosin regulatory light polypeptide 9 OS=Homo sapiens GN=MYL9 PE=1 SV=4	MYL9	P24844	4.92	172	19.814	8	12	-0.58
Tropomyosin alpha-4 chain OS=Homo sapiens GN=TPM4 PE=1 SV=3	TPM4	P67936	4.69	248	28.504	6	9	-0.58
Heterogeneous nuclear ribonucleoprotein U-like protein 2 OS=Homo sapiens GN=HNRNPUL2 PE=1 SV=1	HNRNPUL2	Q1KMD3	4.91	747	85.052	6	9	-0.58
rRNA 2'-O-methyltransferase fibrillarin OS=Homo sapiens GN=FBL PE=1 SV=2	FBL	P22087	10.18	321	33.763	4	6	-0.58
Isoform 4 of Citron Rho-interacting kinase OS=Homo sapiens GN=CIT	CIT	O14578-4	6.67	2069	236.459	4	6	-0.58
Kinesin-like protein KIF14 OS=Homo sapiens GN=KIF14 PE=1 SV=1	KIF14	Q15058	7.91	1648	186.375	4	6	-0.58
Keratin, type II cytoskeletal 1b OS=Homo sapiens GN=KRT77 PE=2 SV=3	KRT77	Q7Z794	5.99	578	61.864	25	38	-0.6
Isoform 4 of Myosin-10 OS=Homo sapiens GN=MYH10	MYH10	P35580-4	5.55	2007	232.385	35	54	-0.63
CTP synthase 1 OS=Homo sapiens GN=CTPS1 PE=1 SV=2	CTPS1	P17812	6.46	591	66.648	5	8	-0.68
Isoform 2 of Tropomyosin alpha-4 chain OS=Homo sapiens GN=TPM4	TPM4	P67936-2	4.73	284	32.703	5	8	-0.68
Protein disulfide-isomerase OS=Homo sapiens GN=P4HB PE=1 SV=3	P4HB	P07237	4.87	508	57.081	5	8	-0.68
DNA topoisomerase 1 OS=Homo sapiens GN=TOP1 PE=1 SV=2	TOP1	P11387	9.31	765	90.669	6	10	-0.74
C-1-tetrahydrofolate synthase, cytoplasmic OS=Homo sapiens GN=MTHFD1 PE=1 SV=1	MTHFD1	F5H2F4	8.43	1020	110.544	7	12	-0.78
Complement component 1 Q subcomponent-binding protein, mitochondrial OS=Homo sapiens GN=C1QBP PE=1 SV=1	C1QBP	Q07021	4.84	282	31.343	4	7	-0.81
Annexin A1 OS=Homo sapiens GN=ANXA1 PE=1 SV=2	ANXA1	P04083	7.02	346	38.69	4	7	-0.81
Fragile X mental retardation syndrome-related protein 2 OS=Homo sapiens GN=FXR2 PE=1 SV=2	FXR2	P51116	6.23	673	74.178	6	11	-0.87
Unconventional myosin-Ib OS=Homo sapiens GN=MYO1B PE=1 SV=3	MYO1B	O43795	9.38	1136	131.902	6	11	-0.87
60 kDa heat shock protein, mitochondrial OS=Homo sapiens GN=HSPD1 PE=1 SV=2	HSPD1	P10809	5.87	573	61.016	5	17	-1.77
