# Supplementary material for: The interactome of the copper transporter ATP7A belongs to a network of neurodevelopmental and neurodegeneration factors
Source: eLife. 2017 Mar 29;6:e24722. doi: 10.7554/eLife.24722 (PMC5400511; doi:10.7554/eLife.24722)
Supplement: Supplementary file 3. — Selected hits from BCS treated cells and copper treated cell immunoisolated ATP7A complexes. Tab with the sum of these hits (BCS+Cu Hits) was used for bioinformatics (Tabs A-C). Crapome lists hits from one of the CRAPome datasets and the proteins shared by the ATP7A interactome and the CRAPome. Tabs (A), (B), and (C) contain DAVID, ENRICHR and GDA bioinformatic analyses, respectively, which are graphically depicted in Figures 2 and 3. DOI: http://dx.doi.org/10.7554/eLife.24722.015 [file elife-24722-supp3.xlsx]

## Sheet: BSC
KIF1B
MAGED1
HINT1
KTN1
DCX
CLASP2
NAGK
MZT2B
DYNC1I2
MMS19
PFDN1
AGL
PALLD
COPG2
ARHGEF2
ASNA1
ISL1
RAD50
FNBP1L
PARD3
COG2
PSMD3
CKAP5
TRAPPC9
TRAF2
GPSM1
DCTN2
DNAJB1
WDR26
ELAVL3
TES
SRPK1
YBX2
TRAPPC3
VPS28
CTTN
UNK
MVB12A
DPYSL4
CYFIP1
PFDN5
ZYX
DNM2
QARS
COPB1
EDC3
SKP1
DHX57
DOCK7
PRMT1
ARCN1
MAPRE1
UBQLN4
FAM96B
GIT1
LMAN1
PUM2
PFDN2
MEX3A
DPF2
ARHGEF7
TELO2
SQSTM1
CBS
COPS6
CPNE1
CRTC3
ENO2
LDB1
AHCYL2
VPS16
UXT
CARM1
KIF2A
LARP4B
ABI2
PRKAR2B
CAPNS1
ZC3HAV1
RAP1GDS1
FSD1
EPRS
COG7
TDRD3
FAM21C
TRIM25
AKAP9
TOP3B
PFDN6
HDLBP
PRR36
FAM89B
LIMCH1
FKBP4
FAM175B
VPS11
TCAF1
STK24
ZCCHC14
DNAJA2
RTL1
ST13
VAC14
TTI1
RNF214
PDCD5
SHC1
CTBP1
COG4
FAM167A
CNN3
STAU2
DCAF7
NME7
PDLIM5
DPYSL5
TIA1
ABCD3
DCTN1
PRRC2A
NELFA
VBP1
TNPO3
TBC1D5
LRRC47
DHX36
PPM1G
VPS35
PDLIM4
EMILIN1
FHL1
SEPT6
GLUL
CCDC178
ILVBL
ACBD3
WDR62
PFDN4
CSNK2B-LY6G5B--991
CENPB
ASNSD1
RNMT
TMED10
DVL2
PRPF38A
THEM6
RANBP1
EDF1
HBZ
INTS3
SCCPDH
TXLNA
STXBP1
BRCC3
PSMD13
VPS26B
PSMC1
GART
CTBP2
COPE
GIT2
COG5
C19orf43
NXF1
GID8
MLLT4
GPHN
PRKACB
AHSA1
NSF
RRM1
CREB5
BUD31
MSI2
CSNK1D
PKIA
SOGA1
EMD
SAMD4A
GGCT
CDK6
PSMA1
NUDCD3
IPO9
SERPINB12
SART1
GPR98
DPCD
RPA1
PITPNM3
PDCD6
COMMD2
AP3D1
PPP2R5D
MSI1
PSMD4
NAP1L1
PDS5B
IGHG3
SACS
BCAS2
MAP2
LARS
SEH1L
ELAVL4
PSMC5
SH3GL1
LRRIQ1
PSMC2
STK3
PPP1R12A
IPO7
TBL2
DOCK4
CIAO1
BRD3
COG1
VAV3
SNX27
SGPL1
PFN2
PTPN23
IRF2BP2
HSPE1-MOB4
PLEKHA6
HIP1
MZT1
RBM11
MYO1A
IMP4
WDR82
ARFIP2
USP29
PSMD1
MCM5
LRSAM1
FAM195B
PRSS12
HSPH1
CAGE1
CTPS2
SRI
VGF
TRAPPC11
CHMP2A
RNF2
TTC37
PPIH
BRK1
MIF
UBR4
TBL1XR1
SMTNL2
FAF2
TRMT112
DBH
KIAA1462
ATP5J2-PTCD1
CIC
MSRB3
HOMER3
GOLGA2
SLC3A2
ARF3
RNF31
HAUS8
VPS37B
RFC4
KDM1A
NEDD8
CDK5
SCRIB
HPRT1
FAM98B
PSMA6
MARCKS
FN3KRP
ANXA7
WDR61
S100A6
IMMT
PPP2R2A
RUFY1
IDH3G
TBCA
ARPC5
MAP7
TROVE2
MAP1B
DPYSL2
CRMP1
KIF5C
DPYSL3
KIF5A
SEPT2
NAP1L4
NES
MOGS
COPA
INA

## Sheet: Copper
KIF1B
MAGED1
HINT1
KTN1
DCX
CLASP2
NAGK
MZT2B
DYNC1I2
MMS19
PFDN1
AGL
PALLD
COPG2
ARHGEF2
ASNA1
ISL1
RAD50
FNBP1L
PARD3
COG2
PSMD3
CKAP5
TRAPPC9
TRAF2
GPSM1
DCTN2
DNAJB1
WDR26
ELAVL3
TES
SRPK1
YBX2
TRAPPC3
VPS28
CTTN
UNK
MVB12A
DPYSL4
CYFIP1
PFDN5
ZYX
DNM2
QARS
COPB1
EDC3
SKP1
DHX57
DOCK7
PRMT1
ARCN1
MAPRE1
UBQLN4
FAM96B
GIT1
LMAN1
PUM2
PFDN2
MEX3A
DPF2
ARHGEF7
TELO2
SQSTM1
CBS
COPS6
CPNE1
CRTC3
ENO2
LDB1
AHCYL2
VPS16
UXT
CARM1
KIF2A
LARP4B
ABI2
PRKAR2B
CAPNS1
ZC3HAV1
RAP1GDS1
FSD1
EPRS
COG7
TDRD3
FAM21C
TRIM25
AKAP9
TOP3B
PFDN6
HDLBP
PRR36
FAM89B
LIMCH1
FKBP4
FAM175B
VPS11
TCAF1
STK24
ZCCHC14
DNAJA2
RTL1
ST13
VAC14
TTI1
RNF214
PDCD5
SHC1
CTBP1
COG4
FAM167A
CNN3
STAU2
DCAF7
NME7
PDLIM5
DPYSL5
TIA1
ABCD3
DCTN1
PRRC2A
NELFA
VBP1
TNPO3
TBC1D5
LRRC47
DHX36
PPM1G
VPS35
PDLIM4
EMILIN1
FHL1
SEPT6
GLUL
TIPRL
CASP3
FIGNL1
ATP5L
R3HDM2
VTN
SRPK2
DYNC1LI1
OBP2A
KIF21A
CCDC18
WASH1
PYGB
IRS2
ILKAP
ARIH1
PAFAH1B2
CUL7
PARK7
FKBP15
EPM2AIP1
NDNF
PRRC2B
SUGP2
DYNC1LI2
CLK3
RBM15
GDI1
PDCD6IP
TFG
PIK3R6
PSMC6
KLF16
PRKRA
DIS3L
ZNF687
HTATSF1
TBL1X
ADH5
COG6
NPR2
ADO
MRPL40
VPS13C
TANK
UACA
STRC
SENP3
SPATA5
TRAPPC10
RBFOX1
NDC1
HEATR1
TKT
MYO10
WDR33
KIAA1407
TMCO1
MAPK1
ASCC2
STT3A
PLRG1
C2CD5
XPO5
PSMD6
BTF3L4
PKHD1
PPP6R3
ASNS
XP32
AP3B2
SUCLG1
CSNK2A2
SCAMP3
AASDHPPT
C5orf51
VAPB
COPG1
EEF1E1
HSPA12A
PBX1
SSBP1
RBMS3
GPI
SMAD9
WDR7
MTOR
METTL14
SBF1
EPB41L5
DNAJC11
ERC1
OTUD4
EPHX2
S100A11
SCYL2
WDR5
STRN
IGKV3D-20
ANKHD1
TMC3
VPS33B
SKIV2L
ZC2HC1A
ZSWIM8
SNRK
C2orf68
KPNA4
GAR1
ABCE1
RFC3
COX4I1
DAB2
GNL1
TMOD1
RBM17
SRP54
DCLK2
CORO1B
ZCCHC3
PDE4C
KIAA0196
SUPT6H
PLS1
CDC42BPB
C11orf57
IGKV3D-15
SYNPO
LARP1
LBR
DYNLT1
GSE1
EPS15L1
TECR
SGTA
SCAF4
VPS51
TBCE
ABAT
GNE
SCYL1
CLTB
SP3
CHERP
TNRC6C
ATP5H
CTR9
RNPEP
PSMD12
CUL3
SRP68
C11orf98
SRP72
DBNL
ATP6V1H
SSR4
LGALS3BP
VPS33A
DHX16
SSSCA1
PPP3CB
PDE4B
RNF20
TAGLN2
SAR1A
IDNK
STAG2
ABCA7
LAS1L
BRE
CBX8
MYO18A
ENAH
WDR3
CELF2
TCEB1
PRKAR2A
RBM15B
FERMT2
STUB1
CKMT1A
CDK11B
S100A8
SPATS2
ZNF845
HERC1
NIPSNAP1
HELZ
SPATA16
TMED4
KIAA1033
TRIM56
NOGENE
TXNDC5
BABAM1
KIF3C
LRP1B
CTCF
SNX9
OSBPL8
CDV3
DNM1L
LEMD2
NT5C3A
FAM120C
MRPL15
GTF3C4
SKOR2
FARP1
PPM1B
DYRK1A
LYPLA2
COPZ1
SSBP3
SYMPK
KPNA3
LOR
TMOD3
TOMM70A
SAMD4B
PA2G4
KIT
UTP15
FAM195A
UBXN1
TRGC1
E4F1
CCP110
CPEB4
CTNNA2
ARPC1B
RBM10
DYNLL1
TCEB2
S100A9
KPNA1
ARF4
RPL36AL
USP5
YLPM1

## Sheet: BCS+Cu Hits
ATP7A
CCDC178
ILVBL
ACBD3
WDR62
PFDN4
CSNK2B-LY6G5B--991
CENPB
ASNSD1
RNMT
TMED10
DVL2
PRPF38A
THEM6
RANBP1
EDF1
HBZ
INTS3
SCCPDH
TXLNA
STXBP1
BRCC3
PSMD13
VPS26B
PSMC1
GART
CTBP2
COPE
GIT2
COG5
C19orf43
NXF1
GID8
MLLT4
GPHN
PRKACB
AHSA1
NSF
RRM1
CREB5
BUD31
MSI2
CSNK1D
PKIA
SOGA1
EMD
SAMD4A
GGCT
CDK6
PSMA1
NUDCD3
IPO9
SERPINB12
SART1
GPR98
DPCD
RPA1
PITPNM3
PDCD6
COMMD2
AP3D1
PPP2R5D
MSI1
PSMD4
NAP1L1
PDS5B
IGHG3
SACS
BCAS2
MAP2
LARS
SEH1L
ELAVL4
PSMC5
SH3GL1
LRRIQ1
PSMC2
STK3
PPP1R12A
IPO7
TBL2
DOCK4
CIAO1
BRD3
COG1
VAV3
SNX27
SGPL1
PFN2
PTPN23
IRF2BP2
HSPE1-MOB4
PLEKHA6
HIP1
MZT1
RBM11
MYO1A
IMP4
WDR82
ARFIP2
USP29
PSMD1
MCM5
LRSAM1
FAM195B
PRSS12
HSPH1
CAGE1
CTPS2
SRI
VGF
TRAPPC11
CHMP2A
RNF2
TTC37
PPIH
BRK1
MIF
UBR4
TBL1XR1
SMTNL2
FAF2
TRMT112
DBH
KIAA1462
ATP5J2-PTCD1
CIC
MSRB3
HOMER3
GOLGA2
SLC3A2
ARF3
RNF31
HAUS8
VPS37B
RFC4
KDM1A
NEDD8
CDK5
SCRIB
HPRT1
FAM98B
PSMA6
MARCKS
FN3KRP
ANXA7
WDR61
S100A6
IMMT
PPP2R2A
RUFY1
IDH3G
TBCA
ARPC5
MAP7
TROVE2
MAP1B
DPYSL2
CRMP1
KIF5C
DPYSL3
KIF5A
SEPT2
NAP1L4
NES
MOGS
COPA
INA
TIPRL
CASP3
FIGNL1
ATP5L
R3HDM2
VTN
SRPK2
DYNC1LI1
OBP2A
KIF21A
CCDC18
WASH1
PYGB
IRS2
ILKAP
ARIH1
PAFAH1B2
CUL7
PARK7
FKBP15
EPM2AIP1
NDNF
PRRC2B
SUGP2
DYNC1LI2
CLK3
RBM15
GDI1
PDCD6IP
TFG
PIK3R6
PSMC6
KLF16
PRKRA
DIS3L
ZNF687
HTATSF1
TBL1X
ADH5
COG6
NPR2
ADO
MRPL40
VPS13C
TANK
UACA
STRC
SENP3
SPATA5
TRAPPC10
RBFOX1
NDC1
HEATR1
TKT
MYO10
WDR33
KIAA1407
TMCO1
MAPK1
ASCC2
STT3A
PLRG1
C2CD5
XPO5
PSMD6
BTF3L4
PKHD1
PPP6R3
ASNS
XP32
AP3B2
SUCLG1
CSNK2A2
SCAMP3
AASDHPPT
C5orf51
VAPB
COPG1
EEF1E1
HSPA12A
PBX1
SSBP1
RBMS3
GPI
SMAD9
WDR7
MTOR
METTL14
SBF1
EPB41L5
DNAJC11
ERC1
OTUD4
EPHX2
S100A11
SCYL2
WDR5
STRN
IGKV3D-20
ANKHD1
TMC3
VPS33B
SKIV2L
ZC2HC1A
ZSWIM8
SNRK
C2orf68
KPNA4
GAR1
ABCE1
RFC3
COX4I1
DAB2
GNL1
TMOD1
RBM17
SRP54
DCLK2
CORO1B
ZCCHC3
PDE4C
KIAA0196
SUPT6H
PLS1
CDC42BPB
C11orf57
IGKV3D-15
SYNPO
LARP1
LBR
DYNLT1
GSE1
EPS15L1
TECR
SGTA
SCAF4
VPS51
TBCE
ABAT
GNE
SCYL1
CLTB
SP3
CHERP
TNRC6C
ATP5H
CTR9
RNPEP
PSMD12
CUL3
SRP68
C11orf98
SRP72
DBNL
ATP6V1H
SSR4
LGALS3BP
VPS33A
DHX16
SSSCA1
PPP3CB
PDE4B
RNF20
TAGLN2
SAR1A
IDNK
STAG2
ABCA7
LAS1L
BRE
CBX8
MYO18A
ENAH
WDR3
CELF2
TCEB1
PRKAR2A
RBM15B
FERMT2
STUB1
CKMT1A
CDK11B
S100A8
SPATS2
ZNF845
HERC1
NIPSNAP1
HELZ
SPATA16
TMED4
KIAA1033
TRIM56
NOGENE
TXNDC5
BABAM1
KIF3C
LRP1B
CTCF
SNX9
OSBPL8
CDV3
DNM1L
LEMD2
NT5C3A
FAM120C
MRPL15
GTF3C4
SKOR2
FARP1
PPM1B
DYRK1A
LYPLA2
COPZ1
SSBP3
SYMPK
KPNA3
LOR
TMOD3
TOMM70A
SAMD4B
PA2G4
KIT
UTP15
FAM195A
UBXN1
TRGC1
E4F1
CCP110
CPEB4
CTNNA2
ARPC1B
RBM10
DYNLL1
TCEB2
S100A9
KPNA1
ARF4
RPL36AL
USP5
YLPM1
KIF1B
MAGED1
HINT1
KTN1
DCX
CLASP2
NAGK
MZT2B
DYNC1I2
MMS19
PFDN1
AGL
PALLD
COPG2
ARHGEF2
ASNA1
ISL1
RAD50
FNBP1L
PARD3
COG2
PSMD3
CKAP5
TRAPPC9
TRAF2
GPSM1
DCTN2
DNAJB1
WDR26
ELAVL3
TES
SRPK1
YBX2
TRAPPC3
VPS28
CTTN
UNK
MVB12A
DPYSL4
CYFIP1
PFDN5
ZYX
DNM2
QARS
COPB1
EDC3
SKP1
DHX57
DOCK7
PRMT1
ARCN1
MAPRE1
UBQLN4
FAM96B
GIT1
LMAN1
PUM2
PFDN2
MEX3A
DPF2
ARHGEF7
TELO2
SQSTM1
CBS
COPS6
CPNE1
CRTC3
ENO2
LDB1
AHCYL2
VPS16
UXT
CARM1
KIF2A
LARP4B
ABI2
PRKAR2B
CAPNS1
ZC3HAV1
RAP1GDS1
FSD1
EPRS
COG7
TDRD3
FAM21C
TRIM25
AKAP9
TOP3B
PFDN6
HDLBP
PRR36
FAM89B
LIMCH1
FKBP4
FAM175B
VPS11
TCAF1
STK24
ZCCHC14
DNAJA2
RTL1
ST13
VAC14
TTI1
RNF214
PDCD5
SHC1
CTBP1
COG4
FAM167A
CNN3
STAU2
DCAF7
NME7
PDLIM5
DPYSL5
TIA1
ABCD3
DCTN1
PRRC2A
NELFA
VBP1
TNPO3
TBC1D5
LRRC47
DHX36
PPM1G
VPS35
PDLIM4
EMILIN1
FHL1
SEPT6
GLUL

## Sheet: CRAPOME
CRAPOME DATASET	COMMON TO CRAPOME AND BCS+Cu Hits
ACLY	AGL
ACTN1	BUD31
ACTN4	COPA
ACTR1A	COPE
ACTR1B	COPG2
AGL	DCTN2
ALYREF	DNAJA2
AMD1	HSPH1
ANKFY1	MCM5
AP1B1	NAP1L1
AP3M1	PDCD5
ARL1	PPM1B
ARL6IP4	PRMT1
ATP1A1	PSMC1
ATP1A2	PSMC2
ATP1A3	PSMC5
ATP5A1	PSMC6
ATP5B	PSMD1
ATP5C1	PSMD12
ATP5J	PSMD3
ATP5J2	RANBP1
BAG2	RBM10
BCKDK	SKP1
BUD31	SRP54
C1QBP	SRP72
C7orf55-LUC7L2	SSR4
CAD	SSSCA1
CALU	STUB1
CANX	TAGLN2
CAP1	YBX2
CCAR2	ZYX
CCDC124
CCDC132
CCT2
CCT3
CCT4
CCT5
CCT6A
CCT6B
CCT7
CCT8
CIRBP
CLNS1A
CLTC
CLUH
CMBL
COPA
COPE
COPG2
COPRS
COPS7A
CPSF6
CSE1L
DCTN2
DDB1
DDX17
DDX3X
DDX3Y
DDX46
DDX5
DHX9
DIAPH1
DNAJA1
DNAJA2
DNAJC7
DYNC1H1
EEF1A1
EEF1A2
EEF1B2
EEF1D
EEF2
EFTUD2
EIF1AX
EIF1AY
EIF3A
EIF3F
EIF3G
EIF3H
EIF3I
EIF3M
EIF4B
EIF4H
EIF5B
EPM2A
EPPK1
EWSR1
FASN
FAU
FBL
FBXO31
FLNA
FRG1
FUS
G3BP1
GANAB
GAPDH
GTF2I
H2AFV
H2AFZ
HNRNPA0
HNRNPA1
HNRNPA1L2
HNRNPF
HNRNPH1
HNRNPH2
HNRNPK
HNRNPU
HSP90AA1
HSP90AB1
HSP90B1
HSPA1A
HSPA1B
HSPA1L
HSPA2
HSPA4
HSPA5
HSPA6
HSPA8
HSPA9
HSPD1
HSPH1
HUWE1
HYOU1
IQGAP1
IVNS1ABP
KHDRBS1
KIAA0368
KIF11
KLC2
KPNA2
KPNB1
KRT1
KRT10
KRT18
LONP1
LRPPRC
LRRC59
LSM14A
LSM4
LSM7
LTF
LUC7L3
MAP4
MARS
MCM2
MCM3
MCM4
MCM5
MCM6
MCM7
MRPS35
MRRF
MTHFD1L
MYH10
MYH11
MYH14
MYH9
MYL12A
MYL12B
MYL6
MYL9
NACA
NAP1L1
NASP
NONO
NPM1
NT5DC2
NTPCR
NUDT21
P4HB
PARP1
PDAP1
PDCD5
PDIA6
PGRMC1
PHB
PHB2
PHGDH
PIN4
PKM
PPIB
PPIL4
PPM1B
PRDX1
PRDX2
PRDX6
PRKDC
PRMT1
PRMT5
PRPF38B
PRPF8
PRPS1
PRPS1L1
PRPS2
PRPSAP1
PRPSAP2
PRSS1
PSMA2
PSMB4
PSMB7
PSMC1
PSMC2
PSMC3
PSMC4
PSMC5
PSMC6
PSMD1
PSMD11
PSMD12
PSMD14
PSMD2
PSMD3
PSMD7
PTCD1
PTCH2
PUF60
QPCT
RABEP1
RANBP1
RBBP4
RBBP7
RBM10
RBM3
RBMX
RBMXL1
RBMXL2
RBMXL3
RCN2
ROCK1
RPL10
RPL23
RPL24
RPL31
RPL38
RPL9
RPN2
RPS10
RPS10-NUDT3
RPS13
RPS15
RPS17
RPS17L
RPS18
RPS19
RPS24
RPS25
RPS28
RPS3
RPS3A
RPS4X
RPS5
RPS6
RPS7
RSRC2
RTCB
RUVBL1
RUVBL2
SCO2
SEC23IP
2-Sep
SERBP1
SET
SF3B3
SKP1
SLC25A31
SLC25A4
SLC25A5
SLC25A6
SMEK1
SNRNP200
SNRNP27
SNRPB
SNRPD1
SNRPD3
SNRPN
SPTBN4
SRP54
SRP72
SRSF3
SRSF7
SSR4
SSSCA1
STIP1
STK38
STK38L
STUB1
SUB1
TAB1
TAF15
TAGLN2
TCP1
TIMM13
TIMM50
TIMM8A
TMEM109
TMEM259
TNPO1
TRIM21
TRIM28
TUBA1A
TUBA1B
TUBA1C
TUBA3C
TUBA3D
TUBA3E
TUBA4A
TUBA8
TUBB
TUBB1
TUBB2A
TUBB2B
TUBB4A
TUBB4B
TUBB6
TUBB8
UBAP2L
UGGT1
UQCRC1
USP39
USP7
VARS
VCP
VIM
WARS
WDR77
XRCC5
XRCC6
XRN2
YBX1
YBX2
YBX3
YME1L1
YWHAE
ZNF706
ZYX

## Sheet: (A) BP
Category	Term	Count	%	PValue	Genes	List Total	Pop Hits	Pop Total	Fold Enrichment	Bonferroni	Benjamini	FDR
GOTERM_BP_FAT	GO:0015031~protein transport	58	11.553784860557768	2.8973529011725175E-11	COPA, CLTB, XPO5, VPS37B, VPS33B, VPS33A, SEH1L, HOMER3, COPB1, AP3B2, VPS16, VPS11, SAR1A, NSF, SCAMP3, ARHGEF2, LRP1B, STXBP1, IPO9, CDK5, MAPK1, COPG2, IPO7, ARCN1, KPNA4, PDCD6IP, SRP72, VPS26B, ERC1, KPNA3, KPNA1, COPE, CHMP2A, SNX9, COPZ1, LMAN1, PPP3CB, AP3D1, TMED10, VPS35, TNPO3, GDI1, LRSAM1, SRP54, SNX27, RUFY1, COG4, COG5, PPIH, COG6, COG7, TOMM70A, ARF3, ARF4, SSR4, VPS28, COG1, COG2	392	762	13528	2.626760940596711	5.693290672237339E-8	5.693290672237339E-8	4.971203448889128E-8
GOTERM_BP_FAT	GO:0045184~establishment of protein localization	58	11.553784860557768	4.1654295326309967E-11	COPA, CLTB, XPO5, VPS37B, VPS33B, VPS33A, SEH1L, HOMER3, COPB1, AP3B2, VPS16, VPS11, SAR1A, NSF, SCAMP3, ARHGEF2, LRP1B, STXBP1, IPO9, CDK5, MAPK1, COPG2, IPO7, ARCN1, KPNA4, PDCD6IP, SRP72, VPS26B, ERC1, KPNA3, KPNA1, COPE, CHMP2A, SNX9, COPZ1, LMAN1, PPP3CB, AP3D1, TMED10, VPS35, TNPO3, GDI1, LRSAM1, SRP54, SNX27, RUFY1, COG4, COG5, PPIH, COG6, COG7, TOMM70A, ARF3, ARF4, SSR4, VPS28, COG1, COG2	392	769	13528	2.6028502428279503	8.185078781419719E-8	4.0925394739765864E-8	7.146954139614081E-8
GOTERM_BP_FAT	GO:0008104~protein localization	61	12.151394422310757	3.787641996920813E-10	COPA, CLTB, XPO5, VPS37B, VPS33B, VPS33A, VPS13C, SEH1L, HOMER3, COPB1, AP3B2, VPS16, VPS11, SAR1A, NSF, SCAMP3, ARHGEF2, LRP1B, STXBP1, IPO9, CDK5, MAPK1, COPG2, IPO7, ARCN1, SRP72, KPNA4, PDCD6IP, KPNA3, VPS26B, ERC1, KPNA1, COPE, CHMP2A, SNX9, COPZ1, NEDD8, LMAN1, SQSTM1, PPP3CB, AP3D1, TMED10, VPS35, TNPO3, GDI1, LRSAM1, SRP54, SNX27, RUFY1, COG4, COG5, PPIH, COG6, COG7, TOMM70A, ARF3, ARF4, …	392	882	13528	2.386760146235365	7.442714591299193E-7	2.4809054788299534E-7	6.498747207039912E-7
GOTERM_BP_FAT	GO:0046907~intracellular transport	50	9.9601593625498	9.230172658003405E-10	COPA, ENAH, CLTB, XPO5, RBM15B, HOMER3, COPB1, AP3B2, RANBP1, VPS16, SAR1A, ARHGEF2, SCAMP3, IPO9, CDK5, MAPK1, UXT, COPG2, KIF1B, SCYL1, IPO7, TXNDC5, ARCN1, KPNA4, SRP72, VPS26B, ERC1, KPNA3, TRAPPC3, KPNA1, COPE, SNX9, COPZ1, LMAN1, SQSTM1, PPP3CB, AP3D1, TMED10, VPS35, SRP54, NXF1, COG4, COG5, PPIH, COG7, TOMM70A, SSR4, COG1, DNM2, COG2	392	657	13528	2.626347342590004	1.8137271897700202E-6	4.534321058624613E-7	1.583691089379613E-6
GOTERM_BP_FAT	GO:0016192~vesicle-mediated transport	46	9.163346613545817	1.1247626386396059E-9	ABCA7, COPA, CLTB, COPZ1, EPS15L1, TXLNA, LMAN1, VPS33B, VPS33A, DAB2, SQSTM1, COPB1, AP3B2, TMED10, AP3D1, VPS35, SAR1A, HIP1, DBNL, LRSAM1, SCAMP3, VAV3, LRP1B, STXBP1, RUFY1, ATP6V1H, CDK5, COG4, COG5, COPG2, SCYL1, COG7, FNBP1L, TXNDC5, ARF3, ARF4, ARCN1, CPNE1, ERC1, COG1, TRAPPC10, TRAPPC3, COPE, SH3GL1, DNM2, COG2	392	576	13528	2.7560232426303855	2.2101561000242853E-6	4.420316107589528E-7	1.9298410647294872E-6
GOTERM_BP_FAT	GO:0048193~Golgi vesicle transport	20	3.9840637450199203	6.7406526769448814E-9	COPA, SCAMP3, COPZ1, LMAN1, COG4, COPG2, COG5, SCYL1, COG7, TXNDC5, COPB1, ARCN1, AP3B2, TMED10, SAR1A, COPE, TRAPPC3, COG1, COG2, DNM2	392	131	13528	5.268733447577504	1.3245294885666503E-5	2.2075613308469855E-6	1.156545176295154E-5
GOTERM_BP_FAT	GO:0000278~mitotic cell cycle	33	6.573705179282868	3.159143583266091E-8	SEPT2, CUL3, SEH1L, PSMD1, PPP3CB, PSMD3, PSMD4, CLASP2, E4F1, PSMD6, STAG2, SSSCA1, ARHGEF2, PDS5B, CKAP5, CDK6, SKP1, DCTN1, DCTN2, FSD1, PSMA1, PSMC6, PSMD13, PSMC5, PSMA6, PSMD12, RNF2, PSMC2, PSMC1, CDK11B, HAUS8, MAPRE1, DNM2	392	370	13528	3.0779371207942634	6.207524558110578E-5	8.868128153483035E-6	5.420382414023095E-5
GOTERM_BP_FAT	GO:0010498~proteasomal protein catabolic process	17	3.386454183266932	3.4249904914591635E-8	UBXN1, TBL1XR1, STUB1, CUL3, PSMA1, PSMC6, PSMD13, PSMC5, PSMA6, PSMD12, PSMC2, PSMD1, PSMC1, PSMD3, PSMD4, TBL1X, PSMD6	392	102	13528	5.7517006802721085	6.729879963918162E-5	8.412597652052156E-6	5.8765160104723435E-5
GOTERM_BP_FAT	GO:0043161~proteasomal ubiquitin-dependent protein catabolic process	17	3.386454183266932	3.4249904914591635E-8	UBXN1, TBL1XR1, STUB1, CUL3, PSMA1, PSMC6, PSMD13, PSMC5, PSMA6, PSMD12, PSMC2, PSMD1, PSMC1, PSMD3, PSMD4, TBL1X, PSMD6	392	102	13528	5.7517006802721085	6.729879963918162E-5	8.412597652052156E-6	5.8765160104723435E-5
GOTERM_BP_FAT	GO:0006511~ubiquitin-dependent protein catabolic process	26	5.179282868525896	3.509555645333431E-8	USP5, NEDD8, STUB1, CUL3, ARIH1, CUL7, SQSTM1, PSMD1, PSMD3, PSMD4, PSMD6, UBXN1, TBL1XR1, SKP1, USP29, PSMA1, PSMC6, PSMC5, PSMD13, PSMD12, PSMA6, PSMC2, PSMC1, TCEB1, TBL1X, RNF20	392	242	13528	3.707707876539046	6.896039177883839E-5	7.662500604688205E-6	6.021610821083101E-5
GOTERM_BP_FAT	GO:0006890~retrograde vesicle-mediated transport, Golgi to ER	9	1.7928286852589643	6.636335970630629E-8	COG4, COPA, COPG2, SCYL1, COG7, COPB1, ARCN1, COPZ1, COPE	392	21	13528	14.790087463556853	1.303955038977067E-4	1.3040315587353746E-5	1.1386462110962725E-4
GOTERM_BP_FAT	GO:0031396~regulation of protein ubiquitination	16	3.187250996015936	1.6953378937659735E-7	SKP1, CDK5, STUB1, PSMA1, PSMC6, PSMD13, PSMC5, PSMA6, PSMD12, PSMC2, PSMC1, PSMD1, PSMD3, PSMD4, VPS28, PSMD6	392	100	13528	5.521632653061224	3.3307844134800035E-4	3.028444362540572E-5	2.9088166554336325E-4
GOTERM_BP_FAT	GO:0031397~negative regulation of protein ubiquitination	14	2.788844621513944	1.7040431969864936E-7	CDK5, PSMA1, PSMC6, PSMC5, PSMD13, PSMA6, PSMD12, PSMC2, PSMC1, PSMD1, PSMD3, PSMD4, VPS28, PSMD6	392	74	13528	6.528957528957529	3.347884624828046E-4	2.7903320416022837E-5	2.923752967509685E-4
GOTERM_BP_FAT	GO:0051437~positive regulation of ubiquitin-protein ligase activity during mitotic cell cycle	13	2.589641434262948	4.848838928825973E-7	SKP1, PSMA1, PSMC6, PSMC5, PSMD13, PSMA6, PSMD12, PSMC2, PSMC1, PSMD1, PSMD3, PSMD4, PSMD6	392	68	13528	6.597539015606243	9.523433135868453E-4	7.328939732376138E-5	8.319490502950444E-4
GOTERM_BP_FAT	GO:0051443~positive regulation of ubiquitin-protein ligase activity	13	2.589641434262948	6.724229588299323E-7	SKP1, PSMA1, PSMC6, PSMC5, PSMD13, PSMA6, PSMD12, PSMC2, PSMC1, PSMD1, PSMD3, PSMD4, PSMD6	392	70	13528	6.409037900874637	0.0013204390106462682	9.43749434346719E-5	0.0011537211332623976
GOTERM_BP_FAT	GO:0031398~positive regulation of protein ubiquitination	14	2.788844621513944	7.843551141190326E-7	SKP1, STUB1, PSMA1, PSMC6, PSMC5, PSMD13, PSMA6, PSMD12, PSMC2, PSMC1, PSMD1, PSMD3, PSMD4, PSMD6	392	84	13528	5.7517006802721085	0.00154007127485134	1.0274528158304985E-4	0.00134576941617226
GOTERM_BP_FAT	GO:0051439~regulation of ubiquitin-protein ligase activity during mitotic cell cycle	13	2.589641434262948	7.883721890842075E-7	SKP1, PSMA1, PSMC6, PSMC5, PSMD13, PSMA6, PSMD12, PSMC2, PSMC1, PSMD1, PSMD3, PSMD4, PSMD6	392	71	13528	6.318769761425697	0.0015479526456962933	9.681731053978737E-5	0.0013526617308357025
GOTERM_BP_FAT	GO:0006457~protein folding	20	3.9840637450199203	8.78782847203478E-7	COPA, FKBP4, TBCE, SACS, VBP1, LMAN1, STUB1, ST13, PFDN2, UXT, PFDN1, PPIH, TBCA, PFDN6, PFDN5, PFDN4, FKBP15, DNAJB1, AHSA1, DNAJA2	392	177	13528	3.899458088320074	0.0017253189764732113	1.0157184437264988E-4	0.0015077841091781785
GOTERM_BP_FAT	GO:0051351~positive regulation of ligase activity	13	2.589641434262948	1.0746692322288266E-6	SKP1, PSMA1, PSMC6, PSMC5, PSMD13, PSMA6, PSMD12, PSMC2, PSMC1, PSMD1, PSMD3, PSMD4, PSMD6	392	73	13528	6.14565278166061	0.0021094980510665273	1.1731123939362487E-4	0.001843876029206104
GOTERM_BP_FAT	GO:0051438~regulation of ubiquitin-protein ligase activity	13	2.589641434262948	2.2286731709731157E-6	SKP1, PSMA1, PSMC6, PSMC5, PSMD13, PSMA6, PSMD12, PSMC2, PSMC1, PSMD1, PSMD3, PSMD4, PSMD6	392	78	13528	5.751700680272109	0.004369772301182184	2.3046542092741706E-4	0.0038238358387010507
GOTERM_BP_FAT	GO:0051436~negative regulation of ubiquitin-protein ligase activity during mitotic cell cycle	12	2.3904382470119523	2.2501144216192395E-6	PSMA1, PSMC6, PSMD13, PSMC5, PSMD12, PSMA6, PSMC2, PSMC1, PSMD1, PSMD3, PSMD4, PSMD6	392	65	13528	6.371114599686028	0.004411719461291264	2.2104955558577277E-4	0.0038606228978999013
GOTERM_BP_FAT	GO:0031145~anaphase-promoting complex-dependent proteasomal ubiquitin-dependent protein catabolic process	12	2.3904382470119523	2.2501144216192395E-6	PSMA1, PSMC6, PSMD13, PSMC5, PSMD12, PSMA6, PSMC2, PSMC1, PSMD1, PSMD3, PSMD4, PSMD6	392	65	13528	6.371114599686028	0.004411719461291264	2.2104955558577277E-4	0.0038606228978999013
GOTERM_BP_FAT	GO:0007049~cell cycle	47	9.362549800796813	2.6728458187130857E-6	PARD3, S100A6, SEPT2, PKHD1, SART1, CUL3, RPA1, SEH1L, PSMD1, PPP3CB, PSMD3, PSMD4, RANBP1, CLASP2, E4F1, PSMD6, STAG2, SSSCA1, ARHGEF2, PDS5B, CKAP5, CDK6, SKP1, CDK5, RAD50, DCTN1, DCTN2, FSD1, MAPK1, PPM1G, PSMA1, PA2G4, PSMC6, PFDN1, PSMD13, PSMC5, PSMA6, PSMD12, PSMC2, RNF2, PSMC1, CDK11B, HAUS8, PDCD6IP, MAPRE1, SEPT6, DNM2	392	776	13528	2.0901798863875447	0.005238380633097783	2.500710628651204E-4	0.004585906579046561
GOTERM_BP_FAT	GO:0022402~cell cycle process	38	7.569721115537849	2.9138670944893293E-6	SEPT2, SART1, RPA1, CUL3, SEH1L, PSMD1, PPP3CB, PSMD3, RANBP1, PSMD4, CLASP2, E4F1, PSMD6, STAG2, SSSCA1, ARHGEF2, PDS5B, CKAP5, CDK6, SKP1, RAD50, DCTN1, DCTN2, FSD1, PPM1G, PSMA1, PA2G4, PSMC6, PSMD13, PSMC5, PSMA6, PSMD12, PSMC2, PSMC1, CDK11B, HAUS8, MAPRE1, DNM2	392	565	13528	2.321040274516886	0.005709396276174061	2.602278249891343E-4	0.004999426516227867
GOTERM_BP_FAT	GO:0051444~negative regulation of ubiquitin-protein ligase activity	12	2.3904382470119523	3.067377077764222E-6	PSMA1, PSMC6, PSMD13, PSMC5, PSMD12, PSMA6, PSMC2, PSMC1, PSMD1, PSMD3, PSMD4, PSMD6	392	67	13528	6.180932074322267	0.006009276835895472	2.6202676072983877E-4	0.005262802585792592
GOTERM_BP_FAT	GO:0051352~negative regulation of ligase activity	12	2.3904382470119523	3.067377077764222E-6	PSMA1, PSMC6, PSMD13, PSMC5, PSMD12, PSMA6, PSMC2, PSMC1, PSMD1, PSMD3, PSMD4, PSMD6	392	67	13528	6.180932074322267	0.006009276835895472	2.6202676072983877E-4	0.005262802585792592
GOTERM_BP_FAT	GO:0051340~regulation of ligase activity	13	2.589641434262948	3.356629323709329E-6	SKP1, PSMA1, PSMC6, PSMC5, PSMD13, PSMA6, PSMD12, PSMC2, PSMC1, PSMD1, PSMD3, PSMD4, PSMD6	392	81	13528	5.53867472915092	0.0065740832288385675	2.747867263311887E-4	0.0057590689882314194
GOTERM_BP_FAT	GO:0006886~intracellular protein transport	29	5.776892430278884	4.164220972107788E-6	COPA, SNX9, CLTB, XPO5, COPZ1, HOMER3, COPB1, AP3B2, PPP3CB, AP3D1, VPS16, SAR1A, ARHGEF2, SRP54, IPO9, CDK5, MAPK1, COPG2, PPIH, COG7, TOMM70A, IPO7, ARCN1, KPNA4, SRP72, KPNA3, SSR4, KPNA1, COG2	392	374	13528	2.6759249154207136	0.008149323994079083	3.2725489033746946E-4	0.007144631438416038
GOTERM_BP_FAT	GO:0051648~vesicle localization	9	1.7928286852589643	8.391658477180312E-6	COPA, MYO1A, COPB1, ARCN1, COPZ1, TMED10, VPS33B, VPS33A, COPE	392	37	13528	8.394373965802538	0.01635446756667136	6.340173143244421E-4	0.014397232948726302
GOTERM_BP_FAT	GO:0006891~intra-Golgi vesicle-mediated transport	7	1.394422310756972	1.1060738973125192E-5	COPG2, COG5, COPB1, COPZ1, COG1, COPE, COG2	392	19	13528	12.714285714285714	0.021499980563224663	8.046565450479104E-4	0.018976058464492684
GOTERM_BP_FAT	GO:0048199~vesicle targeting, to, from or within Golgi	6	1.1952191235059761	1.3169436743347947E-5	COPA, COPB1, ARCN1, COPZ1, TMED10, COPE	392	12	13528	17.255102040816325	0.0255461449580906	9.23791384669248E-4	0.022593404020176955
GOTERM_BP_FAT	GO:0034613~cellular protein localization	29	5.776892430278884	2.4160427357099025E-5	COPA, SNX9, CLTB, XPO5, COPZ1, HOMER3, COPB1, AP3B2, PPP3CB, AP3D1, VPS16, SAR1A, ARHGEF2, SRP54, IPO9, CDK5, MAPK1, COPG2, PPIH, COG7, TOMM70A, IPO7, ARCN1, KPNA4, SRP72, KPNA3, SSR4, KPNA1, COG2	392	411	13528	2.435026565370674	0.04636646187603899	0.0016357576972020338	0.041445799167483255
GOTERM_BP_FAT	GO:0070727~cellular macromolecule localization	29	5.776892430278884	2.727748981134544E-5	COPA, SNX9, CLTB, XPO5, COPZ1, HOMER3, COPB1, AP3B2, PPP3CB, AP3D1, VPS16, SAR1A, ARHGEF2, SRP54, IPO9, CDK5, MAPK1, COPG2, PPIH, COG7, TOMM70A, IPO7, ARCN1, KPNA4, SRP72, KPNA3, SSR4, KPNA1, COG2	392	414	13528	2.4173814453317557	0.052189791271143315	0.0017851047529297004	0.04679175910374811
GOTERM_BP_FAT	GO:0051248~negative regulation of protein metabolic process	18	3.5856573705179287	3.025361538118767E-5	ANKHD1, CDK5, YBX2, PSMA1, PSMC6, PSMD13, PSMC5, PSMA6, PSMD12, TIA1, PSMC2, PSMD1, PSMC1, PSMD3, SERPINB12, PSMD4, PSMD6, VPS28	392	187	13528	3.321837826039507	0.05771665004573667	0.0019158802090319949	0.0518957520756147
GOTERM_BP_FAT	GO:0031400~negative regulation of protein modification process	14	2.788844621513944	3.926236694765356E-5	CDK5, PSMA1, PSMC6, PSMC5, PSMD13, PSMA6, PSMD12, PSMC2, PSMC1, PSMD1, PSMD3, PSMD4, VPS28, PSMD6	392	119	13528	4.060024009603841	0.07425093172981334	0.0024080979204887942	0.06734407630261119
GOTERM_BP_FAT	GO:0006901~vesicle coating	6	1.1952191235059761	4.6472457580359445E-5	COPA, COPB1, ARCN1, COPZ1, COPE, HIP1	392	15	13528	13.80408163265306	0.08727486539880536	0.0027634625005920066	0.07970641338149731
GOTERM_BP_FAT	GO:0016358~dendrite development	8	1.593625498007968	5.332956008946999E-5	MAP2, MAP1B, STRN, ABI2, HPRT1, DCX, CDK5, CTNNA2	392	35	13528	7.888046647230321	0.09949123411246352	0.0030774719027067965	0.09146218500284409
GOTERM_BP_FAT	GO:0006900~membrane budding	6	1.1952191235059761	6.599885605987282E-5	COPA, COPB1, ARCN1, COPZ1, COPE, HIP1	392	16	13528	12.941326530612244	0.12163410211182235	0.003698629783999152	0.11317891673983116
GOTERM_BP_FAT	GO:0051640~organelle localization	12	2.3904382470119523	6.723092023806032E-5	UXT, COPA, MYO1A, KIF1B, SEH1L, COPB1, ARCN1, COPZ1, TMED10, VPS33B, VPS33A, COPE	392	92	13528	4.501330967169476	0.123758200549001	0.0036630855663553064	0.11529058910869638
GOTERM_BP_FAT	GO:0032269~negative regulation of cellular protein metabolic process	17	3.386454183266932	6.769927591150101E-5	ANKHD1, CDK5, YBX2, PSMA1, PSMC6, PSMD13, PSMC5, PSMA6, PSMD12, TIA1, PSMC2, PSMD1, PSMC1, PSMD3, PSMD4, VPS28, PSMD6	392	180	13528	3.259297052154195	0.12456430582668054	0.0035890460937695323	0.11609330715255384
GOTERM_BP_FAT	GO:0016050~vesicle organization	9	1.7928286852589643	1.1201516052665922E-4	COPA, VAV3, COPB1, ARCN1, COPZ1, STXBP1, VPS33B, COPE, HIP1	392	52	13528	5.972919937205652	0.19757919898505105	0.005775942082252072	0.19201913371941215
GOTERM_BP_FAT	GO:0032268~regulation of cellular protein metabolic process	30	5.9760956175298805	1.209662635737223E-4	STUB1, YBX2, PRKAR2B, PRKAR2A, TNRC6C, TIA1, PSMD1, PSMD3, PSMD4, PUM2, PSMD6, SAMD4A, DBNL, DOCK7, SKP1, ANKHD1, CDK5, MAPK1, PSMA1, PSMC6, PA2G4, PSMC5, PSMD13, PSMA6, PSMD12, PSMC2, PSMC1, MTOR, VPS28, CBS	392	474	13528	2.184190131748902	0.21157112995104832	0.006076669236772303	0.2073483425815148
GOTERM_BP_FAT	GO:0048205~COPI coating of Golgi vesicle	5	0.9960159362549801	1.2568824342129223E-4	COPA, COPB1, ARCN1, COPZ1, COPE	392	10	13528	17.255102040816325	0.21885377652067006	0.006155797976775679	0.21543407442841112
GOTERM_BP_FAT	GO:0048194~Golgi vesicle budding	5	0.9960159362549801	1.2568824342129223E-4	COPA, COPB1, ARCN1, COPZ1, COPE	392	10	13528	17.255102040816325	0.21885377652067006	0.006155797976775679	0.21543407442841112
GOTERM_BP_FAT	GO:0048200~Golgi transport vesicle coating	5	0.9960159362549801	1.2568824342129223E-4	COPA, COPB1, ARCN1, COPZ1, COPE	392	10	13528	17.255102040816325	0.21885377652067006	0.006155797976775679	0.21543407442841112
GOTERM_BP_FAT	GO:0043632~modification-dependent macromolecule catabolic process	34	6.772908366533864	1.3394360949038403E-4	USP5, NEDD8, STUB1, CUL3, ARIH1, CUL7, SQSTM1, PSMD1, PSMD3, PSMD4, E4F1, PSMD6, UBXN1, TBL1XR1, LRSAM1, BRCC3, UBR4, SKP1, HERC1, USP29, SENP3, PSMA1, PSMC6, PSMD13, PSMC5, PSMA6, PSMD12, RNF2, PSMC2, PSMC1, TCEB2, TCEB1, TBL1X, RNF20	392	574	13528	2.0441584299224917	0.23142476412077628	0.006399358794036969	0.22956875515458552
GOTERM_BP_FAT	GO:0019941~modification-dependent protein catabolic process	34	6.772908366533864	1.3394360949038403E-4	USP5, NEDD8, STUB1, CUL3, ARIH1, CUL7, SQSTM1, PSMD1, PSMD3, PSMD4, E4F1, PSMD6, UBXN1, TBL1XR1, LRSAM1, BRCC3, UBR4, SKP1, HERC1, USP29, SENP3, PSMA1, PSMC6, PSMD13, PSMC5, PSMA6, PSMD12, RNF2, PSMC2, PSMC1, TCEB2, TCEB1, TBL1X, RNF20	392	574	13528	2.0441584299224917	0.23142476412077628	0.006399358794036969	0.22956875515458552
GOTERM_BP_FAT	GO:0031399~regulation of protein modification process	22	4.382470119521913	1.3745396074604164E-4	DBNL, DOCK7, SKP1, CDK5, STUB1, PSMA1, PRKAR2B, PRKAR2A, PSMC6, PSMD13, PSMC5, PSMA6, PSMD12, PSMC2, PSMD1, PSMC1, PSMD3, PSMD4, MTOR, PSMD6, VPS28, CBS	392	295	13528	2.5736423382912488	0.2367087453397806	0.006410687052030184	0.2355785404309696
GOTERM_BP_FAT	GO:0007017~microtubule-based process	20	3.9840637450199203	1.427422385430272E-4	KIF5A, CKAP5, KIF5C, MAP1B, TBCE, KTN1, DOCK7, KIF3C, DCTN2, UXT, KIF1B, DYNLL1, SEH1L, MAP2, MAP7, RANBP1, HAUS8, KIF21A, DYNC1I2, KIF2A	392	253	13528	2.728079374042107	0.2446004915511798	0.006502222407084868	0.24463152469953453
GOTERM_BP_FAT	GO:0030163~protein catabolic process	35	6.97211155378486	2.725835003333406E-4	USP5, NEDD8, STUB1, CUL3, ARIH1, CUL7, SQSTM1, PSMD1, PSMD3, PSMD4, E4F1, PSMD6, UBXN1, TBL1XR1, LRSAM1, BRCC3, UBR4, SKP1, HERC1, USP29, SENP3, PSMA1, PSMC6, PSMD13, PSMC5, PSMA6, PSMD12, RNF2, PSMC2, PSMC1, TCEB2, MTOR, TCEB1, TBL1X, RNF20	392	622	13528	1.9418925126320625	0.41474029664799883	0.012101175418713028	0.46666379871449504
GOTERM_BP_FAT	GO:0016044~membrane organization	25	4.9800796812749	3.013874597751568E-4	ABCA7, COPA, COPZ1, EPS15L1, VPS33B, DAB2, COPB1, AP3B2, EMD, HIP1, DBNL, LRSAM1, VAV3, DNM1L, LRP1B, STXBP1, RUFY1, ATP6V1H, CDK5, FNBP1L, TXNDC5, ARCN1, COPE, SH3GL1, DNM2	392	381	13528	2.264449086721303	0.4469548422405685	0.013076321572630834	0.5158562808738276
GOTERM_BP_FAT	GO:0051603~proteolysis involved in cellular protein catabolic process	34	6.772908366533864	3.032546736243467E-4	USP5, NEDD8, STUB1, CUL3, ARIH1, CUL7, SQSTM1, PSMD1, PSMD3, PSMD4, E4F1, PSMD6, UBXN1, TBL1XR1, LRSAM1, BRCC3, UBR4, SKP1, HERC1, USP29, SENP3, PSMA1, PSMC6, PSMD13, PSMC5, PSMA6, PSMD12, RNF2, PSMC2, PSMC1, TCEB2, TCEB1, TBL1X, RNF20	392	600	13528	1.955578231292517	0.44898089988831	0.01287264275166533	0.519044388376011
GOTERM_BP_FAT	GO:0044257~cellular protein catabolic process	34	6.772908366533864	3.355717864424489E-4	USP5, NEDD8, STUB1, CUL3, ARIH1, CUL7, SQSTM1, PSMD1, PSMD3, PSMD4, E4F1, PSMD6, UBXN1, TBL1XR1, LRSAM1, BRCC3, UBR4, SKP1, HERC1, USP29, SENP3, PSMA1, PSMC6, PSMD13, PSMC5, PSMA6, PSMD12, RNF2, PSMC2, PSMC1, TCEB2, TCEB1, TBL1X, RNF20	392	603	13528	1.9458489863607134	0.482894944450698	0.013934119930642308	0.574207845960506
GOTERM_BP_FAT	GO:0006903~vesicle targeting	6	1.1952191235059761	3.448272966544079E-4	COPA, COPB1, ARCN1, COPZ1, TMED10, COPE	392	22	13528	9.411873840445269	0.4922177118005545	0.014019599011684702	0.5900011637695268
GOTERM_BP_FAT	GO:0031401~positive regulation of protein modification process	16	3.187250996015936	3.511595790342311E-4	DOCK7, SKP1, STUB1, PSMA1, PSMC6, PSMC5, PSMD13, PSMA6, PSMD12, PSMC2, PSMC1, PSMD1, PSMD3, PSMD4, MTOR, PSMD6	392	187	13528	2.952744734257339	0.4984990394582146	0.013985963720211214	0.6008050144523991
GOTERM_BP_FAT	GO:0051301~cell division	21	4.183266932270916	3.742650618394522E-4	SSSCA1, ARHGEF2, PARD3, SEPT2, PDS5B, PKHD1, CKAP5, CDK6, KIT, CDK5, MCM5, FSD1, SEH1L, CDK11B, CLASP2, PDCD6IP, MAPRE1, HAUS8, E4F1, SEPT6, STAG2	392	295	13528	2.4566585956416462	0.5207670642751077	0.014603686577189245	0.6402171554159675
GOTERM_BP_FAT	GO:0032270~positive regulation of cellular protein metabolic process	18	3.5856573705179287	4.4145839355059087E-4	DOCK7, SKP1, STUB1, MAPK1, PSMA1, PSMC6, PSMC5, PSMD13, PSMA6, PSMD12, PSMC2, PSMC1, PSMD1, PSMD3, PSMD4, MTOR, PSMD6, SAMD4A	392	233	13528	2.666024349654025	0.5800658117873836	0.01686898578314211	0.7547484651456937
GOTERM_BP_FAT	GO:0030030~cell projection organization	24	4.780876494023905	4.505487532185907E-4	S100A6, PARD3, MYO1A, VAV3, SEPT2, PKHD1, MAP1B, KIF5C, TBCE, ARFIP2, DPYSL5, STXBP1, ABI2, STRN, DOCK7, HPRT1, ISL1, CDK5, GPR98, CTNNA2, MAP2, CYFIP1, MTOR, DCX	392	368	13528	2.250665483584738	0.587503600520969	0.016885200492149144	0.7702334695887658
GOTERM_BP_FAT	GO:0031175~neuron projection development	19	3.7848605577689245	4.7275551723261367E-4	S100A6, PARD3, SEPT2, PKHD1, MAP1B, KIF5C, TBCE, DPYSL5, STXBP1, ABI2, STRN, DOCK7, ISL1, HPRT1, CDK5, CTNNA2, MAP2, CYFIP1, DCX	392	256	13528	2.5613042091836733	0.6051243000051767	0.017378990805533512	0.8080520904583777
GOTERM_BP_FAT	GO:0032989~cellular component morphogenesis	25	4.9800796812749	5.453259586376E-4	ARHGEF2, PARD3, S100A6, DNM1L, SSBP1, PKHD1, MAP1B, KIF5C, TBCE, DPYSL5, STXBP1, DOCK7, HPRT1, ISL1, CDK5, SCRIB, CTNNA2, CUL3, DAB2, CYFIP1, MAP7, CLASP2, DCX, CDC42BPB, TMOD1	392	397	13528	2.173186655014651	0.6576281292358734	0.019653519582952805	0.9315465567874548
GOTERM_BP_FAT	GO:0043085~positive regulation of catalytic activity	30	5.9760956175298805	5.541916260159242E-4	TRAF2, PARD3, PKHD1, KIT, BUD31, SCRIB, PRKAR2B, PRKAR2A, PSMD1, PSMD3, SHC1, PSMD4, PRKACB, PSMD6, HIP1, DBNL, VAV3, SSBP1, DOCK7, SKP1, CDK5, PSMA1, PSMC6, PSMD13, UACA, PSMC5, PSMA6, PSMD12, PSMC2, PSMC1	392	520	13528	1.990973312401884	0.6635441729444217	0.019610408356287246	0.9466234987919209
GOTERM_BP_FAT	GO:0009057~macromolecule catabolic process	40	7.968127490039841	5.994652753245203E-4	USP5, NEDD8, STUB1, CUL3, RPA1, ARIH1, CASP3, CUL7, SQSTM1, PSMD1, PSMD3, PSMD4, E4F1, PSMD6, UBXN1, TBL1XR1, ABCE1, LRSAM1, BRCC3, UBR4, SKP1, HERC1, CDK5, USP29, SENP3, PSMA1, PSMC6, PSMD13, PSMC5, PSMA6, PSMD12, RNF2, PSMC2, PSMC1, TCEB2, MTOR, TCEB1, TBL1X, RNF20, PYGB	392	781	13528	1.7674880451540411	0.6921992057030302	0.020821295837907927	1.0235821204896522
GOTERM_BP_FAT	GO:0051247~positive regulation of protein metabolic process	18	3.5856573705179287	7.134822031405601E-4	DOCK7, SKP1, STUB1, MAPK1, PSMA1, PSMC6, PSMC5, PSMD13, PSMA6, PSMD12, PSMC2, PSMC1, PSMD1, PSMD3, PSMD4, MTOR, PSMD6, SAMD4A	392	243	13528	2.5563114134542704	0.7540170158479804	0.02430489995423646	1.2171449348276187
GOTERM_BP_FAT	GO:0051656~establishment of organelle localization	9	1.7928286852589643	8.122313805132853E-4	UXT, COPA, KIF1B, SEH1L, COPB1, ARCN1, COPZ1, TMED10, COPE	392	69	13528	4.501330967169476	0.7974327175522167	0.027153550340227817	1.3845000615582137
GOTERM_BP_FAT	GO:0044093~positive regulation of molecular function	32	6.374501992031872	8.758969430110654E-4	TRAF2, PARD3, PKHD1, KIT, BUD31, SCRIB, PRKAR2B, PRKAR2A, PSMD1, PSMD3, SHC1, PSMD4, PRKACB, PSMD6, HIP1, DBNL, VAV3, SSBP1, DOCK7, SKP1, CDK5, PSMA1, PSMC6, PSMD13, UACA, PSMC5, PSMA6, PSMD12, PSMC2, PSMC1, EDF1, ERC1	392	586	13528	1.8845162638434214	0.8212722718601491	0.0287628474499112	1.4922556445656876
GOTERM_BP_FAT	GO:0007010~cytoskeleton organization	26	5.179282868525896	8.941550344617443E-4	CNN3, FERMT2, S100A9, ABI2, ARPC5, PFN2, DYNLL1, SEH1L, RANBP1, INA, ARHGEF2, CKAP5, MAP1B, TBCE, ARFIP2, DOCK7, PALLD, CDK5, DCTN2, UXT, LIMCH1, MAP2, MAP7, HAUS8, TMOD1, CDC42BPB	392	436	13528	2.0579479498221307	0.8275763299715204	0.028871689920215937	1.5231374636793027

## Sheet: (A) CC
Category	Term	Count	%	PValue	Genes	List Total	Pop Hits	Pop Total	Fold Enrichment	Bonferroni	Benjamini	FDR
GOTERM_CC_FAT	GO:0005829~cytosol	97	19.322709163346612	5.249635271147606E-18	COPA, ENAH, PDLIM5, VBP1, UBQLN4, QARS, SART1, PRKAR2B, CASP3, PRKAR2A, AASDHPPT, DYNLL1, COPB1, PDE4B, PSMD3, PSMD4, SHC1, PRKACB, PSMD6, NSF, RNF31, DBNL, CTBP1, ARHGEF2, STK24, ARHGEF7, ATP6V1H, PDE4C, SKP1, HERC1, CDK5, DCTN1, DCTN2, UXT, PFDN2, MAPK1, PSMA1, GLUL, PFDN1, PFDN6, PFDN5, RRM1, ARCN1, PFDN4, PDCD6IP, MAPRE1, VPS26B, ERC1, KPNA1, TRAPPC3, DYNC1I2, COPE, CHMP2A, TRAF2, GGCT, GNE, …	372	1330	12782	2.505970571590266	2.0053606735783857E-15	2.0053606735783857E-15	7.27314535245978E-15
GOTERM_CC_FAT	GO:0005856~cytoskeleton	89	17.729083665338646	4.4659468066712266E-13	LOR, DYNC1LI1, ENAH, DYNC1LI2, SEPT2, HINT1, PDLIM5, FERMT2, STRN, CTTN, DYNLL1, HOMER3, RANBP1, E4F1, VPS16, ZYX, VPS11, STAG2, KIF2A, INA, TBL1XR1, DBNL, SYMPK, ARHGEF2, KIF5A, KIF5C, TBCE, UBR4, DYNLT1, PALLD, CDK5, DCTN1, FARP1, CTNNA2, DCTN2, MAPK1, UXT, ARPC1B, KIF1B, SCYL1, FNBP1L, TBCA, PFDN5, EPB41L5, FKBP15, MAPRE1, PDCD6IP, HAUS8, SEPT6, MYO18A, DYNC1I2, PARD3, CNN3, PKHD1, GNE, ABI2, …	372	1381	12782	2.214380260524943	1.7061752011215958E-10	8.530876005607979E-11	6.188050072353235E-10
GOTERM_CC_FAT	GO:0043228~non-membrane-bounded organelle	133	26.49402390438247	3.0713999391516353E-12	MRPL40, LOR, DYNC1LI1, ENAH, DYNC1LI2, SEPT2, RBM15B, PDLIM5, SRP68, S100A9, STRN, CBX8, IDH3G, HOMER3, IMP4, STAG2, RPL36AL, INA, DBNL, KIF5A, KIF5C, UBR4, DCTN1, FARP1, DCTN2, CTNNA2, UXT, ARPC1B, MAPK1, RFC3, PA2G4, RFC4, SCYL1, FNBP1L, TELO2, PDCD6IP, SEPT6, MYO18A, RNF20, GNE, PKHD1, ARPC5, PFN2, CRMP1, HTATSF1, CLASP2, EMD, HIP1, GIT1, MYO1A, SRP54, CKAP5, HEATR1, KIF3C, DOCK4, CORO1B, MYO1…	372	2596	12782	1.7603654091488976	1.1732870230929393E-9	3.9109571137174726E-10	4.255340524395024E-9
GOTERM_CC_FAT	GO:0043232~intracellular non-membrane-bounded organelle	133	26.49402390438247	3.0713999391516353E-12	MRPL40, LOR, DYNC1LI1, ENAH, DYNC1LI2, SEPT2, RBM15B, PDLIM5, SRP68, S100A9, STRN, CBX8, IDH3G, HOMER3, IMP4, STAG2, RPL36AL, INA, DBNL, KIF5A, KIF5C, UBR4, DCTN1, FARP1, DCTN2, CTNNA2, UXT, ARPC1B, MAPK1, RFC3, PA2G4, RFC4, SCYL1, FNBP1L, TELO2, PDCD6IP, SEPT6, MYO18A, RNF20, GNE, PKHD1, ARPC5, PFN2, CRMP1, HTATSF1, CLASP2, EMD, HIP1, GIT1, MYO1A, SRP54, CKAP5, HEATR1, KIF3C, DOCK4, CORO1B, MYO1…	372	2596	12782	1.7603654091488976	1.1732870230929393E-9	3.9109571137174726E-10	4.255340524395024E-9
GOTERM_CC_FAT	GO:0044430~cytoskeletal part	59	11.752988047808765	4.657068515453144E-8	DYNC1LI1, DYNC1LI2, SEPT2, FERMT2, STRN, DYNLL1, HOMER3, RANBP1, E4F1, VPS16, ZYX, VPS11, KIF2A, INA, TBL1XR1, ARHGEF2, KIF5A, KIF5C, TBCE, DYNLT1, PALLD, DCTN1, DCTN2, ARPC1B, UXT, KIF1B, SCYL1, TBCA, FKBP15, HAUS8, PDCD6IP, MAPRE1, SEPT6, MYO18A, DYNC1I2, PARD3, CNN3, PKHD1, AKAP9, ARPC5, STAU2, CRMP1, CLASP2, DCX, KIF21A, EMD, SYNPO, NES, MYO1A, CKAP5, MAP1B, KIF3C, FSD1, MYO10, MAP2, MARCKS, …	372	952	12782	2.129467109424415	1.778984391842542E-5	4.447490649761576E-6	6.452167506942885E-5
GOTERM_CC_FAT	GO:0015630~microtubule cytoskeleton	41	8.167330677290837	7.432889197002313E-8	DYNC1LI1, PARD3, DYNC1LI2, SEPT2, PKHD1, AKAP9, STAU2, DYNLL1, CRMP1, RANBP1, CLASP2, E4F1, DCX, KIF21A, EMD, KIF2A, TBL1XR1, ARHGEF2, KIF5A, CKAP5, MAP1B, KIF5C, TBCE, DYNLT1, KIF3C, DCTN1, DCTN2, FSD1, UXT, KIF1B, SCYL1, TBCA, MAP2, MAP7, MARCKS, PDCD6IP, HAUS8, MAPRE1, TBL1X, DYNC1I2, DNM2	372	549	12782	2.566063419315667	2.8393234677071E-5	5.678711430534555E-6	1.0297945451931412E-4
GOTERM_CC_FAT	GO:0030137~COPI-coated vesicle	8	1.593625498007968	8.636686369733341E-8	COPA, COPG2, SCYL1, COPB1, ARCN1, COPZ1, AP3B2, COPE	372	15	12782	18.325448028673836	3.299159910841176E-5	5.498675439419287E-6	1.1965753273779356E-4
GOTERM_CC_FAT	GO:0016272~prefoldin complex	7	1.394422310756972	1.093184969942674E-7	UXT, PFDN2, PFDN1, PFDN6, PFDN5, PFDN4, VBP1	372	10	12782	24.052150537634407	4.1758796226143424E-5	5.965649083838898E-6	1.5145600006372106E-4
GOTERM_CC_FAT	GO:0005874~microtubule	27	5.378486055776892	1.1052590205688502E-7	DYNC1LI1, DYNC1LI2, STAU2, DYNLL1, CLASP2, KIF21A, KIF2A, TBL1XR1, ARHGEF2, KIF5A, KIF5C, MAP1B, TBCE, DYNLT1, KIF3C, DCTN1, DCTN2, FSD1, KIF1B, TBCA, MAP2, MAP7, HAUS8, MAPRE1, TBL1X, DYNC1I2, DNM2	372	274	12782	3.3858606074876385	4.2220005644910685E-5	5.277598190245314E-6	1.5312880582429855E-4
GOTERM_CC_FAT	GO:0000502~proteasome complex	13	2.589641434262948	1.4464742224516244E-7	UBXN1, PSMA1, PSMC6, PSMD13, PSMC5, PSMA6, PSMD12, PSMC2, PSMD1, PSMC1, PSMD3, PSMD4, PSMD6	372	61	12782	7.322668781949585	5.5253792753395814E-5	6.139461075749253E-6	2.0040263648546386E-4
GOTERM_CC_FAT	GO:0005875~microtubule associated complex	16	3.187250996015936	2.313183047744547E-7	DYNC1LI1, DYNC1LI2, KIF5A, KIF5C, MAP1B, DYNLT1, KIF3C, DCTN1, DCTN2, KIF1B, DYNLL1, MAP2, MAP7, HAUS8, DCX, DYNC1I2	372	102	12782	5.389837655492305	8.835969867992954E-5	8.836321222283061E-6	3.2048115055083315E-4
GOTERM_CC_FAT	GO:0030126~COPI vesicle coat	7	1.394422310756972	2.3462214682987955E-7	COPA, COPG2, SCYL1, COPB1, ARCN1, COPZ1, COPE	372	11	12782	21.865591397849464	8.962165433967773E-5	8.147755043208527E-6	3.2505846888630785E-4
GOTERM_CC_FAT	GO:0030663~COPI coated vesicle membrane	7	1.394422310756972	4.577799245873588E-7	COPA, COPG2, SCYL1, COPB1, ARCN1, COPZ1, COPE	372	12	12782	20.04345878136201	1.74856682024771E-4	1.4572558089009924E-5	6.342326586583624E-4
GOTERM_CC_FAT	GO:0009898~internal side of plasma membrane	27	5.378486055776892	1.7468726312942335E-6	CHMP2A, LOR, COPA, CLTB, COPZ1, KIT, VPS33B, VPS33A, ACBD3, GPHN, COPB1, AP3B2, GPSM1, AP3D1, VPS16, VPS11, RNF31, SYMPK, CTNNA2, COG4, COPG2, FNBP1L, ARCN1, MTOR, COPE, COG1, COG2	372	316	12782	2.935841159657003	6.670833289315059E-4	5.132990780720714E-5	0.002420190214069695
GOTERM_CC_FAT	GO:0017119~Golgi transport complex	6	1.1952191235059761	4.481936572311386E-6	COG4, COG5, COG6, COG7, COG1, COG2	372	10	12782	20.616129032258062	0.0017106387941078216	1.2228563731608855E-4	0.00620935273594192
GOTERM_CC_FAT	GO:0043005~neuron projection	27	5.378486055776892	7.415687697739659E-6	CNN3, ABI2, STRN, VGF, CRMP1, VPS16, NSF, SAMD4A, PRSS12, SYNPO, ARHGEF7, KIF5A, KIF5C, MAP1B, DPYSL5, DPYSL3, DOCK7, DPYSL2, DBH, CDK5, PARK7, CTNNA2, DCTN2, MAPK1, MAP2, FKBP15, MTOR	372	342	12782	2.7126485568760614	0.002828794603210727	1.8883571523287124E-4	0.010273628756130027
GOTERM_CC_FAT	GO:0042995~cell projection	42	8.366533864541832	1.2579888735986567E-5	PARD3, ENAH, S100A6, SEPT2, CNN3, PKHD1, STRN, ABI2, ARPC5, VGF, CTTN, CRMP1, VPS16, NSF, PRSS12, SAMD4A, SYNPO, DBNL, MYO1A, KIF5A, ARHGEF7, MAP1B, KIF5C, S100A11, DPYSL5, ARFIP2, CDK6, DOCK7, DPYSL3, DPYSL2, DBH, CDK5, PARK7, DOCK4, DCTN2, CTNNA2, MAPK1, MAP2, CYFIP1, FKBP15, MTOR, MAPRE1	372	697	12782	2.070486416439117	0.004794019553180151	3.0030163317651404E-4	0.01742748917238357
GOTERM_CC_FAT	GO:0030660~Golgi-associated vesicle membrane	8	1.593625498007968	1.4737468704851777E-5	COPA, COPG2, CLTB, SCYL1, COPB1, ARCN1, COPZ1, COPE	372	29	12782	9.478680014831296	0.005613937158044702	3.311072030550699E-4	0.020416199229500442
GOTERM_CC_FAT	GO:0048475~coated membrane	10	1.9920318725099602	7.859982753798093E-5	COPA, COPG2, CLTB, SCYL1, COPB1, ARCN1, COPZ1, AP3B2, AP3D1, COPE	372	63	12782	5.45400238948626	0.02958000258088811	0.0016667380116675012	0.10884170675591331
GOTERM_CC_FAT	GO:0030117~membrane coat	10	1.9920318725099602	7.859982753798093E-5	COPA, COPG2, CLTB, SCYL1, COPB1, ARCN1, COPZ1, AP3B2, AP3D1, COPE	372	63	12782	5.45400238948626	0.02958000258088811	0.0016667380116675012	0.10884170675591331
GOTERM_CC_FAT	GO:0030120~vesicle coat	8	1.593625498007968	9.514922250105002E-5	COPA, COPG2, CLTB, SCYL1, COPB1, ARCN1, COPZ1, COPE	372	38	12782	7.23372948500283	0.0356960490945889	0.0019112623811479157	0.13174459451261722
GOTERM_CC_FAT	GO:0005798~Golgi-associated vesicle	9	1.7928286852589643	9.98030643639108E-5	COPA, COPG2, CLTB, SCYL1, COPB1, ARCN1, COPZ1, AP3B2, COPE	372	51	12782	6.063567362428842	0.037409001312261436	0.0019045177599781304	0.13818421916467205
GOTERM_CC_FAT	GO:0012505~endomembrane system	42	8.366533864541832	1.6727385182969316E-4	COPA, PARD3, S100A6, CLTB, VAPB, PKHD1, COPZ1, LEMD2, UBQLN4, EPS15L1, TAGLN2, LMAN1, VGF, ANXA7, DAB2, STT3A, SEH1L, COPB1, TMED10, EMD, LBR, HIP1, SGPL1, SCAMP3, KTN1, IPO9, NXF1, COPG2, UACA, KIF1B, SCYL1, IPO7, ARCN1, MTOR, KPNA4, SSR4, KPNA3, VPS26B, TRAPPC3, COPE, KPNA1, COG2	372	782	12782	1.845433545087039	0.06190490665184667	0.0030384201669239053	0.23150177956851037
GOTERM_CC_FAT	GO:0005794~Golgi apparatus	45	8.964143426294822	2.248898363692404E-4	COPA, ABCA7, CLTB, VAPB, COPZ1, AKAP9, LMAN1, CUL3, ACBD3, COPB1, AP3B2, GPSM1, TMED10, AP3D1, CLASP2, SAR1A, HIP1, GOLGA2, ARHGEF2, SCAMP3, DNM1L, HERC1, COG4, COG5, GLUL, COPG2, COG6, SCYL1, COG7, TRAPPC9, SCYL2, ARF3, ARF4, ARCN1, SPATA16, MTOR, MAPRE1, ERC1, MYO18A, TMCO1, COG1, TRAPPC10, TRAPPC3, COPE, COG2	372	872	12782	1.7731762355726548	0.08233013649157539	0.0038977285529074868	0.31112529811561096
GOTERM_CC_FAT	GO:0030662~coated vesicle membrane	10	1.9920318725099602	2.4986921035546276E-4	COPA, COPG2, DAB2, CLTB, SCYL1, COPB1, ARCN1, COPZ1, COPE, HIP1	372	73	12782	4.706878774488143	0.09104706730208179	0.004141918728099103	0.34562769916788305
GOTERM_CC_FAT	GO:0000151~ubiquitin ligase complex	11	2.1912350597609564	2.7254720571813463E-4	CUL3, ARIH1, BRCC3, CUL7, RNF2, BRE, SKP1, TCEB1, CBX8, RNF20, STUB1	372	90	12782	4.199581839904421	0.09888935189039438	0.004329236015579996	0.37694175847956535
GOTERM_CC_FAT	GO:0030425~dendrite	15	2.9880478087649402	2.8350729512081424E-4	CNN3, MAP1B, DPYSL5, ABI2, STRN, DPYSL2, CDK5, MAPK1, CRMP1, MAP2, MTOR, SAMD4A, PRSS12, NSF, SYNPO	372	163	12782	3.1619829804076782	0.10265523873312643	0.004323233465447052	0.39207231432618617
GOTERM_CC_FAT	GO:0005938~cell cortex	14	2.788844621513944	3.2734887329133214E-4	DBNL, PARD3, MYO1A, SEPT2, PKHD1, FERMT2, ARFIP2, CTTN, FNBP1L, MARCKS, CLASP2, MAPRE1, SEPT6, TMOD1	372	146	12782	3.2948151421417	0.11756287670717047	0.004798746781308427	0.4525749028453929
GOTERM_CC_FAT	GO:0031981~nuclear lumen	65	12.94820717131474	3.826760641049645E-4	MMS19, LOR, SEPT2, RNMT, GAR1, RBM15B, S100A9, YLPM1, SRP68, UTP15, CTCF, INTS3, KDM1A, CASP3, IDH3G, PLRG1, GIT2, E4F1, IMP4, SRPK2, TBL1XR1, SYMPK, CTBP1, CTBP2, STK24, LAS1L, ZNF687, SKP1, MCM5, MAPK1, SENP3, PA2G4, RFC3, RFC4, EDF1, MYO18A, RNF20, KPNA1, FKBP4, KIT, STAU2, RPA1, SQSTM1, HTATSF1, GTF3C4, BCAS2, SRP54, SMAD9, TRIM25, HEATR1, NXF1, CTR9, PPIH, PSMC5, RNF2, DYRK1A, PSMC1, TCEB2, …	372	1450	12782	1.5402855024100854	0.13602395292144964	0.005400558114499243	0.5288792875977943
GOTERM_CC_FAT	GO:0030286~dynein complex	7	1.394422310756972	3.8787288225517196E-4	DYNC1LI1, DYNC1LI2, DYNLL1, DYNLT1, DYNC1I2, DCTN1, DCTN2	372	34	12782	7.07416192283365	0.13773806323449322	0.005278739071137961	0.5360436802762769
GOTERM_CC_FAT	GO:0031252~cell leading edge	13	2.589641434262948	6.815400039382098E-4	DBNL, ENAH, S100A6, ARFIP2, S100A11, ABI2, CDK6, CDK5, SCRIB, CTNNA2, CTTN, CYFIP1, CDC42BPB	372	138	12782	3.236831852890759	0.2292853215099554	0.008940382579059603	0.9401194535096136
GOTERM_CC_FAT	GO:0030659~cytoplasmic vesicle membrane	13	2.589641434262948	7.268952288742056E-4	COPA, COPG2, DAB2, KIF1B, CLTB, SCYL1, COPB1, ARCN1, COPZ1, TMED10, VGF, COPE, HIP1	372	139	12782	3.213545292798019	0.2425327268594819	0.00921643080542911	1.0023907155100487
GOTERM_CC_FAT	GO:0005625~soluble fraction	21	4.183266932270916	8.238776031226228E-4	SNX9, COPA, MAP1B, EPHX2, ADH5, EPRS, ASNS, NAGK, HPRT1, DBH, PKIA, ANXA7, MAPK1, CTTN, UACA, IPO7, PDE4B, ENO2, MTOR, ASNA1, RNPEP	372	313	12782	2.3053179429042565	0.2701023510134549	0.010105079731932198	1.1354225464402234
GOTERM_CC_FAT	GO:0030426~growth cone	8	1.593625498007968	8.967792992074715E-4	ARHGEF7, MAP1B, FKBP15, DPYSL3, DOCK7, DPYSL2, CDK5, DCTN2	372	54	12782	5.090402230187177	0.2901654674798967	0.010652956924618429	1.2353134142349398
GOTERM_CC_FAT	GO:0008287~protein serine/threonine phosphatase complex	7	1.394422310756972	9.561578109606043E-4	PPM1G, ILKAP, PPP2R5D, PPP3CB, STRN, PPM1B, PPP2R2A	372	40	12782	6.013037634408602	0.30609971793749935	0.011012459874784719	1.3166054292048313
GOTERM_CC_FAT	GO:0044431~Golgi apparatus part	20	3.9840637450199203	9.66181002432584E-4	COPA, SCAMP3, DNM1L, CLTB, COPZ1, LMAN1, COG4, COPG2, COG5, COG6, SCYL1, COG7, COPB1, ARCN1, AP3B2, TMED10, COPE, TRAPPC3, COG1, COG2	372	294	12782	2.337429595494112	0.30875403087971964	0.010801812098328978	1.3303215307265193

## Sheet: (B) BP
Term	Overlap	P-value	Adjusted P-value	Z-score	Combined Score	Genes
retrograde vesicle-mediated transport, Golgi to ER (GO:0006890)	11/25	0.000000006106575795431273	0.000005811521672455335	-2.7048272527922546	32.60849966978426	COPA;TMED10;COG7;COG4;COPB1;COPG2;COPG1;COPZ1;COPE;SCYL1;ARCN1
mitotic cell cycle (GO:0000278)	41/404	0.0000000003271778408103818	0.0000009304937792647259	-2.3048174868207165	32.00826911763298	DYNC1I2;PSMD12;SEH1L;DCTN2;PSMD13;DCTN1;CCP110;PPP2R2A;PDS5B;RNF2;GOLGA2;PSMD6;PSMD4;PRKAR2B;PSMD3;PSMD1;EMD;SKP1;CLASP2;RFC3;RRM1;RFC4;PPP1R12A;CSNK2A2;DYRK1A;RPA1;CSNK1D;DYNLL1;CKAP5;PSMA6;PSMC5;PSMC6;CDK6;STAG2;KIF2A;PSMA1;PSMC1;AKAP9;PSMC2;MCM5;MAPRE1
mitotic cell cycle phase transition (GO:0044772)	31/277	0.000000006488517393296989	0.000005811521672455335	-2.3206285644136044	27.97672779222954	DYNC1I2;PSMD12;DCTN2;PSMD13;DCTN1;CUL3;CCP110;PPP2R2A;PSMD6;PSMD4;PRKAR2B;PSMD3;PSMD1;SKP1;PPP1R12A;RPA1;CSNK1D;DYNLL1;CKAP5;DNM2;PSMA6;PSMC5;PSMC6;CDK6;PSMA1;PSMC1;AKAP9;PSMC2;MCM5;MAPRE1;NES
cell cycle phase transition (GO:0044770)	31/280	0.000000008173729497124241	0.000005811521672455335	-2.3163852213956697	27.925571457104528	DYNC1I2;PSMD12;DCTN2;PSMD13;DCTN1;CUL3;CCP110;PPP2R2A;PSMD6;PSMD4;PRKAR2B;PSMD3;PSMD1;SKP1;PPP1R12A;RPA1;CSNK1D;DYNLL1;CKAP5;DNM2;PSMA6;PSMC5;CDK6;PSMC6;PSMA1;PSMC1;AKAP9;PSMC2;MCM5;MAPRE1;NES
COPI coating of Golgi vesicle (GO:0048205)	7/13	0.0000013492090591114042	0.0003281142138279755	-2.699227512010582	21.65360473912016	COPA;TMED10;COPB1;COPG1;COPZ1;COPE;ARCN1
antigen processing and presentation of exogenous antigen (GO:0019884)	22/173	0.0000001462288166766542	0.00008317495092568092	-2.2913270166680433	21.526019050156325	DYNC1I2;PSMD12;DCTN2;DCTN1;PSMD13;AP3D1;DYNLL1;DNM2;PSMA6;DYNC1LI2;PSMD6;PSMC5;PSMC6;KIF2A;PSMA1;PSMD4;PSMC1;KIF5A;PSMD3;PSMC2;PSMD1;KIF3C
Golgi transport vesicle coating (GO:0048200)	7/13	0.0000013492090591114042	0.0003281142138279755	-2.67490989898402	21.45852522902587	COPA;TMED10;COPB1;COPG1;COPZ1;COPE;ARCN1
antigen processing and presentation of exogenous peptide antigen (GO:0002478)	21/171	0.00000047396933470322165	0.0001684960984869953	-2.2787802197881044	19.79940517536492	DYNC1I2;PSMD12;DCTN2;DCTN1;PSMD13;DYNLL1;DNM2;PSMA6;DYNC1LI2;PSMD6;PSMC5;PSMC6;KIF2A;PSMA1;PSMD4;PSMC1;KIF5A;PSMD3;PSMC2;PSMD1;KIF3C
microtubule-based process (GO:0007017)	35/437	0.000001384448159611711	0.0003281142138279755	-2.4048611883243804	19.292154289594688	DYNC1I2;CUL7;SEH1L;DCTN2;DCTN1;DOCK7;CCP110;DPCD;UXT;HAUS8;KIF5C;MAP2;KIF5A;MAP7;KIF21A;KIF1B;KIF3C;CLASP2;RANBP1;DYNLT1;AP3D1;CSNK1D;DYNLL1;AP3B2;CKAP5;KTN1;DYNC1LI1;DYNC1LI2;KIF2A;NME7;PARD3;MAP1B;TBCE;ARHGEF2;COPG1
Golgi vesicle transport (GO:0048193)	23/202	0.0000004573873179028159	0.0001684960984869953	-2.21669404848344	19.259963393847933	TRAPPC3;COPA;TMED10;COG7;COG6;COG5;CUL3;COPB1;COG4;COG2;COG1;AP3B2;SCAMP3;COPZ1;ARCN1;DNM2;LMAN1;VPS51;COPG2;COPG1;COPE;TXNDC5;SCYL1
regulation of cellular amino acid metabolic process (GO:0006521)	13/62	0.00000040714613836888937	0.0001684960984869953	-2.2046474455948672	19.155295304531382	PSMD12;PSMD13;PARK7;PSMA6;PSMD6;PSMC5;PSMC6;PSMA1;PSMD4;PSMC1;PSMD3;PSMC2;PSMD1
vesicle coating (GO:0006901)	10/41	0.00000279437766329048	0.0004182742144420066	-2.405330697657937	18.711965467433355	DAB2;COPA;HIP1;TMED10;CUL3;COPB1;COPG1;COPZ1;COPE;ARCN1
antigen processing and presentation of peptide antigen (GO:0048002)	21/185	0.0000015136403740962227	0.0003311379403022813	-2.2693807322782567	18.18449227900619	DYNC1I2;PSMD12;DCTN2;PSMD13;DCTN1;DYNLL1;DNM2;PSMA6;DYNC1LI2;PSMD6;PSMC5;PSMC6;KIF2A;PSMA1;PSMD4;PSMC1;KIF5A;PSMD3;PSMC2;PSMD1;KIF3C
vesicle organization (GO:0016050)	17/126	0.0000018570250613812194	0.0003520919516378792	-2.2279930924039175	17.716150401278785	VAV3;LRSAM1;COPA;TMED10;HIP1;CUL3;COPB1;STXBP1;VPS33B;AP3D1;FNBP1L;COPZ1;ARCN1;DAB2;MYO18A;COPG1;COPE
negative regulation of protein ubiquitination (GO:0031397)	16/113	0.0000021206631038475576	0.0003719259208371062	-2.2004303287731157	17.37639312140487	PSMD12;UBXN1;PSMD13;PARK7;PSMA6;PSMD6;PSMC5;PSMC6;PSMA1;CDK5;PSMD4;PSMC1;PSMD3;PSMC2;PSMD1;VPS28
regulation of cellular amine metabolic process (GO:0033238)	14/82	0.0000013034688493621401	0.0003281142138279755	-2.1556426792829457	17.292886327022543	PSMD12;PSMD13;PARK7;PSMA6;PSMD6;PSMC5;PSMC6;PSMA1;PSMD4;PSMC1;PSMD3;PSMC2;PSMD1;HPRT1
ubiquitin-dependent protein catabolic process (GO:0006511)	29/355	0.000007981511326525024	0.0007042491074645374	-2.3809130121456694	17.281567623837752	CUL7;PSMD12;UBXN1;PSMD13;CUL3;NEDD8;PTPN23;PSMD6;PSMD4;PSMD3;MVB12A;PSMD1;TCEB1;ARIH1;TBL1X;SKP1;RNF20;USP5;USP29;PSMA6;PSMC5;PSMC6;PSMA1;TBL1XR1;PSMC1;PSMC2;STUB1;SQSTM1;VPS28
negative regulation of ubiquitin-protein transferase activity (GO:0051444)	13/74	0.0000023539615242854823	0.0003719259208371062	-2.1526194056509644	16.998839065362123	PSMD12;PSMD13;PARK7;PSMA6;PSMD6;PSMC5;PSMC6;PSMA1;PSMD4;PSMC1;PSMD3;PSMC2;PSMD1
positive regulation of ubiquitin-protein ligase activity involved in mitotic cell cycle (GO:0051437)	13/72	0.0000017970979287447266	0.0003520919516378792	-2.1357675483262883	16.98280808738671	PSMD12;PSMD13;PSMA6;PSMC5;PSMD6;PSMC6;PSMD4;PSMA1;PSMC1;PSMD3;PSMC2;PSMD1;SKP1
negative regulation of ligase activity (GO:0051352)	13/74	0.0000023539615242854823	0.0003719259208371062	-2.149687762280327	16.975688417493913	PSMD12;PSMD13;PARK7;PSMA6;PSMD6;PSMC5;PSMC6;PSMA1;PSMD4;PSMC1;PSMD3;PSMC2;PSMD1
modification-dependent protein catabolic process (GO:0019941)	29/364	0.00001241162333524357	0.0009540177504171004	-2.369714252188536	16.480955697544754	PSMD12;CUL7;UBXN1;PSMD13;CUL3;NEDD8;PTPN23;PSMD6;PSMD4;PSMD3;MVB12A;PSMD1;TCEB1;ARIH1;TBL1X;SKP1;RNF20;USP5;USP29;PSMA6;PSMC5;PSMC6;PSMA1;TBL1XR1;PSMC1;PSMC2;STUB1;SQSTM1;VPS28
negative regulation of protein modification by small protein conjugation or removal (GO:1903321)	16/119	0.000003877824277198903	0.0005342618324052354	-2.1774028388515143	16.40591281150843	PSMD12;UBXN1;PSMD13;PARK7;PSMA6;PSMD6;PSMC5;PSMC6;PSMA1;CDK5;PSMD4;PSMC1;PSMD3;PSMC2;PSMD1;VPS28
antigen processing and presentation (GO:0019882)	22/225	0.000007929776114462357	0.0007042491074645374	-2.255503058227667	16.37129472084614	DYNC1I2;PSMD12;DCTN2;PSMD13;DCTN1;AP3D1;DYNLL1;DNM2;PSMA6;DYNC1LI2;PSMD6;PSMC5;PSMC6;KIF2A;PSMA1;PSMD4;PSMC1;KIF5A;PSMD3;PSMC2;PSMD1;KIF3C
DNA damage response, signal transduction by p53 class mediator resulting in cell cycle arrest (GO:0006977)	12/67	0.000004828120850017611	0.0005970076390195689	-2.19022626359251	16.259321307284072	PSMA6;PSMD6;PSMD12;PSMC5;PSMC6;PSMA1;PSMD4;PSMD13;PSMC1;PSMD3;PSMC2;PSMD1
modification-dependent macromolecule catabolic process (GO:0043632)	29/368	0.00001502263212034542	0.0010681091437565594	-2.3677904819976456	16.200103652796148	CUL7;PSMD12;UBXN1;PSMD13;CUL3;NEDD8;PTPN23;PSMD6;PSMD4;PSMD3;MVB12A;PSMD1;TCEB1;ARIH1;TBL1X;SKP1;RNF20;USP5;USP29;PSMA6;PSMC5;PSMC6;PSMA1;TBL1XR1;PSMC1;PSMC2;STUB1;SQSTM1;VPS28
intracellular signal transduction involved in G1 DNA damage checkpoint (GO:1902400)	12/68	0.000005524605843890709	0.0006284791608010071	-2.1915815410046138	16.156794284426947	PSMA6;PSMD6;PSMC5;PSMD12;PSMC6;PSMA1;PSMD4;PSMD13;PSMC1;PSMD3;PSMC2;PSMD1
signal transduction involved in mitotic G1 DNA damage checkpoint (GO:0072431)	12/68	0.000005524605843890709	0.0006284791608010071	-2.1886594033811706	16.1352516789754	PSMA6;PSMD6;PSMC5;PSMD12;PSMC6;PSMA1;PSMD4;PSMD13;PSMC1;PSMD3;PSMC2;PSMD1
signal transduction involved in mitotic DNA integrity checkpoint (GO:1902403)	12/69	0.000006307848352784493	0.0006298770606818975	-2.186563761461797	16.114944090103933	PSMA6;PSMD6;PSMC5;PSMD12;PSMC6;PSMA1;PSMD4;PSMD13;PSMC1;PSMD3;PSMC2;PSMD1
signal transduction involved in mitotic DNA damage checkpoint (GO:1902402)	12/69	0.000006307848352784493	0.0006298770606818975	-2.1833345750919753	16.091145032091823	PSMA6;PSMD6;PSMC5;PSMD12;PSMC6;PSMA1;PSMD4;PSMD13;PSMC1;PSMD3;PSMC2;PSMD1
signal transduction involved in mitotic cell cycle checkpoint (GO:0072413)	12/69	0.000006307848352784493	0.0006298770606818975	-2.179799695965936	16.065093022776843	PSMA6;PSMD6;PSMC5;PSMD12;PSMC6;PSMA1;PSMD4;PSMD13;PSMC1;PSMD3;PSMC2;PSMD1
regulation of ubiquitin-protein ligase activity involved in mitotic cell cycle (GO:0051439)	13/78	0.000003944971336325578	0.0005342618324052354	-2.1049790018057686	15.86022639333782	PSMD12;PSMD13;PSMA6;PSMD6;PSMC5;PSMC6;PSMA1;PSMD4;PSMC1;PSMD3;PSMC2;PSMD1;SKP1
signal transduction involved in DNA integrity checkpoint (GO:0072401)	12/71	0.00000817166685876573	0.0007042491074645374	-2.167888149191471	15.735352555953318	PSMA6;PSMD6;PSMC5;PSMD12;PSMC6;PSMA1;PSMD4;PSMD13;PSMC1;PSMD3;PSMC2;PSMD1
signal transduction involved in DNA damage checkpoint (GO:0072422)	12/71	0.00000817166685876573	0.0007042491074645374	-2.1647552401544776	15.712612716611877	PSMA6;PSMD6;PSMC5;PSMD12;PSMC6;PSMA1;PSMD4;PSMD13;PSMC1;PSMD3;PSMC2;PSMD1
anaphase-promoting complex-dependent proteasomal ubiquitin-dependent protein catabolic process (GO:0031145)	13/82	0.0000064227970322696995	0.0006298770606818975	-2.1252273911606894	15.66289590586463	PSMD12;PSMD13;PSMA6;PSMD6;PSMC5;PSMC6;PSMA1;PSMD4;PSMC1;PSMD3;PSMC2;PSMD1;SKP1
pyrimidine nucleobase metabolic process (GO:0006206)	8/32	0.000024115090665809182	0.0013447709383051238	-2.3520614055015296	15.550728275919536	NT5C3A;RRM1;DPYSL4;DPYSL5;DPYSL2;DPYSL3;MAPK1;CRMP1
negative regulation of ubiquitin-protein ligase activity involved in mitotic cell cycle (GO:0051436)	12/67	0.000004828120850017611	0.0005970076390195689	-2.0929800715489715	15.537406357843068	PSMA6;PSMC5;PSMD6;PSMD12;PSMC6;PSMD4;PSMA1;PSMD13;PSMC1;PSMD3;PSMC2;PSMD1
signal transduction involved in cell cycle checkpoint (GO:0072395)	12/72	0.000009272723291952873	0.0007756360306562933	-2.1656582403820175	15.510070049578273	PSMA6;PSMD6;PSMC5;PSMD12;PSMC6;PSMA1;PSMD4;PSMD13;PSMC1;PSMD3;PSMC2;PSMD1
positive regulation of ubiquitin-protein transferase activity (GO:0051443)	13/87	0.000011385167385700326	0.0008994282234703258	-2.1492366204292237	15.074211148685082	PSMD12;PSMD13;PSMA6;PSMD6;PSMC5;PSMC6;PSMA1;PSMD4;PSMC1;PSMD3;PSMC2;PSMD1;SKP1
'de novo' posttranslational protein folding (GO:0051084)	10/49	0.000011030160891888208	0.0008962793593294303	-2.1347821016880637	14.980317653638398	DNAJB1;HSPH1;VBP1;TBCE;PFDN1;PFDN2;TBCA;PFDN4;PFDN5;PFDN6
regulation of ubiquitin-protein transferase activity (GO:0051438)	14/103	0.000013921220597386708	0.0010151782404863537	-2.158799020255909	14.879934740748189	PSMD12;PSMD13;PARK7;PSMA6;PSMD6;PSMC5;PSMC6;PSMA1;PSMD4;PSMC1;PSMD3;PSMC2;PSMD1;SKP1
regulation of cell cycle arrest (GO:0071156)	14/105	0.00001692861522094613	0.0011564292618711084	-2.1936604300761466	14.834449313182347	PSMD12;PSMD13;MIF;PSMA6;PSMD6;PSMC5;PSMC6;PSMA1;CDK5;PSMD4;PSMC1;PSMC2;PSMD3;PSMD1
protein folding (GO:0006457)	21/221	0.000018900940266484443	0.0011685711764756904	-2.192927619798407	14.806589161281215	FKBP15;ST13;VBP1;MOGS;TBCA;HSPE1-MOB4;UXT;DNAJB1;LMAN1;HSPH1;DNAJA2;TBCE;SACS;PFDN1;PFDN2;PPIH;FKBP4;PFDN4;PFDN5;PFDN6;TXNDC5
DNA damage response, signal transduction by p53 class mediator (GO:0030330)	13/91	0.000017523046432132117	0.0011564292618711084	-2.1672473629356	14.655833106074795	PSMD12;PSMD13;MIF;PSMA6;PSMD6;PSMC5;PSMC6;PSMA1;PSMD4;PSMC1;PSMD3;PSMC2;PSMD1
antigen processing and presentation of exogenous peptide antigen via MHC class I, TAP-dependent (GO:0002479)	12/75	0.000013393359095359817	0.0010023871912421926	-2.1045032971546935	14.532375895637013	PSMA6;PSMD6;PSMD12;PSMC5;PSMC6;PSMA1;PSMD4;PSMD13;PSMC1;PSMD3;PSMC2;PSMD1
intra-Golgi vesicle-mediated transport (GO:0006891)	8/33	0.000029165187336968325	0.0015650149582327908	-2.2455906845903715	14.50620120859567	COG6;COG5;COPB1;COG2;COG1;COPG2;COPZ1;COPE
protein polyubiquitination (GO:0000209)	19/186	0.000018802904625919198	0.0011685711764756904	-2.1459009625271097	14.48906641791384	RNF20;RNF31;PSMD12;LRSAM1;PSMD13;CUL3;TRAF2;PSMA6;PSMD6;PSMC5;PSMC6;PSMA1;PSMD4;PSMC1;PSMD3;PSMC2;PSMD1;STUB1;TRIM56
G1/S transition of mitotic cell cycle (GO:0000082)	17/152	0.000017891310661859622	0.0011564292618711084	-2.1316295161344154	14.414970329059427	PSMD12;PSMD13;CUL3;RPA1;PSMA6;PSMD6;PSMC5;CDK6;PSMC6;PSMA1;PSMD4;PSMC1;PSMD3;PSMC2;PSMD1;MCM5;SKP1
cell cycle G1/S phase transition (GO:0044843)	17/152	0.000017891310661859622	0.0011564292618711084	-2.128761946856873	14.395578626261438	PSMD12;PSMD13;CUL3;RPA1;PSMA6;PSMD6;PSMC5;CDK6;PSMC6;PSMA1;PSMD4;PSMC1;PSMD3;PSMC2;PSMD1;MCM5;SKP1
proteolysis involved in cellular protein catabolic process (GO:0051603)	29/391	0.00004243250761905188	0.00211715880120322	-2.3333560160783717	14.368060320043824	CUL7;PSMD12;UBXN1;PSMD13;CUL3;NEDD8;PTPN23;PSMD6;PSMD4;PSMD3;MVB12A;PSMD1;TCEB1;ARIH1;TBL1X;SKP1;RNF20;USP5;USP29;PSMA6;PSMC5;PSMC6;PSMA1;TBL1XR1;PSMC1;PSMC2;STUB1;SQSTM1;VPS28
positive regulation of ligase activity (GO:0051351)	13/92	0.00001945020076767764	0.0011769440634739408	-2.1132593009312983	14.253583134064188	PSMD12;PSMD13;PSMA6;PSMD6;PSMC5;PSMC6;PSMA1;PSMD4;PSMC1;PSMD3;PSMC2;PSMD1;SKP1
regulation of ligase activity (GO:0051340)	14/108	0.00002251399108521178	0.0013067304213539245	-2.1288887512222536	14.136304828110871	PSMD12;PSMD13;PARK7;PSMA6;PSMD6;PSMC5;PSMC6;PSMA1;PSMD4;PSMC1;PSMD3;PSMC2;PSMD1;SKP1
antigen processing and presentation of exogenous peptide antigen via MHC class I (GO:0042590)	12/79	0.000021323740474781987	0.0012634316231308327	-2.0677790786870194	13.80019990224106	PSMA6;PSMD12;PSMD6;PSMC5;PSMC6;PSMA1;PSMD4;PSMD13;PSMC1;PSMD3;PSMC2;PSMD1
'de novo' protein folding (GO:0006458)	10/54	0.000023185795547546245	0.0013188080507444304	-2.0481660679819536	13.58144437886131	DNAJB1;HSPH1;VBP1;TBCE;PFDN1;PFDN2;TBCA;PFDN4;PFDN5;PFDN6
negative regulation of G1/S transition of mitotic cell cycle (GO:2000134)	13/99	0.00003895827839333229	0.0020144971591024917	-2.1738057509499846	13.493650653807936	PSMD12;PSMD13;FHL1;PSMA6;PSMD6;PSMC5;PSMC6;PSMA1;PSMD4;PSMC1;PSMD3;PSMC2;PSMD1
ribonucleoside monophosphate catabolic process (GO:0009158)	26/332	0.000045744639005956237	0.0022050466666599924	-2.2049931028058767	13.487957376685548	ABCD3;ATP5H;ATP5L;PSMD6;KIF5C;ASNA1;DHX57;KIF5A;DHX36;ATP6V1H;DHX16;KIF21A;KIF1B;KIF3C;NSF;RFC3;MYO10;ABCA7;PSMC5;PSMC6;KIF2A;PSMC1;PSMC2;SKIV2L;HPRT1;ABCE1
negative regulation of cell cycle G1/S phase transition (GO:1902807)	13/99	0.00003895827839333229	0.0020144971591024917	-2.170831748506458	13.4751898736766	PSMD12;PSMD13;FHL1;PSMA6;PSMD6;PSMC5;PSMC6;PSMA1;PSMD4;PSMC1;PSMD3;PSMC2;PSMD1
purine ribonucleoside monophosphate catabolic process (GO:0009169)	26/332	0.000045744639005956237	0.0022050466666599924	-2.2025409860994833	13.472957762593147	ABCD3;ATP5H;ATP5L;PSMD6;KIF5C;ASNA1;DHX57;KIF5A;DHX36;ATP6V1H;DHX16;KIF21A;KIF1B;KIF3C;NSF;RFC3;MYO10;ABCA7;PSMC5;PSMC6;KIF2A;PSMC1;PSMC2;SKIV2L;HPRT1;ABCE1
purine nucleoside monophosphate catabolic process (GO:0009128)	26/333	0.00004793635366396817	0.0022721831636720916	-2.2054578637406266	13.424653253722328	ABCD3;ATP5H;ATP5L;PSMD6;KIF5C;ASNA1;DHX57;KIF5A;DHX36;ATP6V1H;DHX16;KIF21A;KIF1B;KIF3C;NSF;RFC3;MYO10;ABCA7;PSMC5;PSMC6;KIF2A;PSMC1;PSMC2;SKIV2L;HPRT1;ABCE1
nucleoside monophosphate catabolic process (GO:0009125)	26/335	0.00005260577792131079	0.002452636596855867	-2.2177778663861685	13.330157172030036	ABCD3;ATP5H;ATP5L;PSMD6;KIF5C;ASNA1;DHX57;KIF5A;DHX36;ATP6V1H;DHX16;KIF21A;KIF1B;KIF3C;NSF;RFC3;MYO10;ABCA7;PSMC5;PSMC6;KIF2A;PSMC1;PSMC2;SKIV2L;HPRT1;ABCE1
positive regulation of cell cycle arrest (GO:0071158)	12/85	0.00004080280243132306	0.0020721994663336213	-2.143172368233967	13.242972162534155	PSMA6;PSMD6;PSMD12;PSMC5;PSMC6;PSMA1;PSMD4;PSMD13;PSMC1;PSMD3;PSMC2;PSMD1
microtubule-based movement (GO:0007018)	18/187	0.00006340718581310759	0.0028176568195699683	-2.1433130777049767	12.585212154763315	DYNC1I2;DCTN1;AP3D1;DPCD;AP3B2;KTN1;UXT;DYNC1LI1;DYNC1LI2;KIF2A;NME7;KIF5C;MAP1B;KIF5A;KIF21A;KIF1B;KIF3C;COPG1
establishment of organelle localization (GO:0051656)	17/168	0.0000571980974283407	0.002623732082035499	-2.1089261764018383	12.53368045596321	SEH1L;DYNLT1;DCTN2;DCTN1;CUL3;AP3D1;SCRIB;FNBP1L;AP3B2;DNM2;UXT;CDK5;MAP1B;DPYSL2;KIF1B;COPG1;ARHGEF2
ATP catabolic process (GO:0006200)	25/327	0.00009141439886762964	0.0038232727996990986	-2.1828079107585774	12.150924315243403	ABCD3;ATP5H;ATP5L;PSMD6;KIF5C;ASNA1;DHX57;KIF5A;DHX36;DHX16;ATP6V1H;KIF21A;KIF1B;KIF3C;NSF;RFC3;MYO10;ABCA7;PSMC5;PSMC6;KIF2A;PSMC1;PSMC2;SKIV2L;ABCE1
signal transduction in response to DNA damage (GO:0042770)	13/106	0.00007372190980660991	0.003225617099846132	-2.0983573017125856	12.037501542408117	PSMD12;PSMD13;MIF;PSMA6;PSMD6;PSMC5;PSMC6;PSMA1;PSMD4;PSMC1;PSMD3;PSMC2;PSMD1
regulation of cellular ketone metabolic process (GO:0010565)	17/178	0.00011002227317365358	0.0045348310855923306	-2.206608124741214	11.906785600444005	PSMD12;PSMD13;IRS2;PARK7;SOGA1;MTOR;PSMA6;PSMD6;PSMC5;PSMC6;PSMA1;PSMD4;PSMC1;PSMD3;PSMC2;WDR5;PSMD1
cell cycle G2/M phase transition (GO:0044839)	15/139	0.00008011523348293768	0.003400712298887683	-2.014623996253199	11.450660175847831	DYNC1I2;PPP1R12A;DCTN2;DCTN1;CCP110;CSNK1D;PPP2R2A;DYNLL1;CKAP5;DNM2;PRKAR2B;AKAP9;MAPRE1;NES;SKP1
G2/M transition of mitotic cell cycle (GO:0000086)	15/139	0.00008011523348293768	0.003400712298887683	-2.0120704627565322	11.436146477821621	DYNC1I2;PPP1R12A;DCTN2;DCTN1;CCP110;CSNK1D;PPP2R2A;DYNLL1;CKAP5;DNM2;PRKAR2B;AKAP9;MAPRE1;NES;SKP1
purine ribonucleoside monophosphate metabolic process (GO:0009167)	28/402	0.00015648048407317794	0.006096308174029014	-2.2208451901719775	11.326470167286091	ABCD3;ATP5H;ATP5L;PSMD6;KIF5C;ASNA1;DHX57;FIGNL1;KIF5A;DHX36;ATP6V1H;DHX16;KIF21A;KIF1B;KIF3C;NSF;RFC3;MYO10;ABCA7;PSMC5;PSMC6;KIF2A;PSMC1;PSMC2;SKIV2L;HPRT1;ABCE1;GART
purine nucleoside monophosphate metabolic process (GO:0009126)	28/403	0.00016266830493975046	0.006168382123315338	-2.2198428857180397	11.295268048907003	ABCD3;ATP5H;ATP5L;PSMD6;KIF5C;ASNA1;DHX57;FIGNL1;KIF5A;DHX36;ATP6V1H;DHX16;KIF21A;KIF1B;KIF3C;NSF;RFC3;MYO10;ABCA7;PSMC5;PSMC6;KIF2A;PSMC1;PSMC2;SKIV2L;HPRT1;ABCE1;GART
regulation of G1/S transition of mitotic cell cycle (GO:2000045)	14/129	0.00013029906115392823	0.005219303238334815	-2.1441107227785987	11.268140978615449	PSMD12;PSMD13;FHL1;PLRG1;PSMA6;PSMD6;PSMC5;PSMC6;PSMA1;PSMD4;PSMC1;PSMD3;PSMC2;PSMD1
regulation of cell cycle G1/S phase transition (GO:1902806)	14/131	0.00015110499090603552	0.005968647140788403	-2.1465501854946423	10.992987910964427	PSMD12;PSMD13;FHL1;PLRG1;PSMA6;PSMD6;PSMC5;PSMC6;PSMA1;PSMD4;PSMC1;PSMD3;PSMC2;PSMD1
signal transduction by p53 class mediator (GO:0072331)	14/132	0.000162544088538949	0.006168382123315338	-2.1262022640715554	10.818794723444064	PSMD12;PSMD13;MIF;PSMA6;HINT1;PSMD6;PSMC5;PSMC6;PSMA1;PSMD4;PSMC1;PSMD3;PSMC2;PSMD1
endocytosis (GO:0006897)	24/323	0.0001881449292309898	0.006860053573499167	-2.1643772697890555	10.783014193191239	LGALS3BP;LRSAM1;DBNL;HIP1;FKBP15;ABCA7;SCRIB;EPS15L1;FNBP1L;PRSS12;LRP1B;DNM2;RUFY1;VTN;DAB2;CDK5;DPYSL2;ATP6V1H;MAPK1;SNX9;DNM1L;SCYL2;TXNDC5;SH3GL1
nucleobase metabolic process (GO:0009112)	10/67	0.0001176578717374958	0.004780271246020544	-1.9914925866089188	10.641058671559112	NT5C3A;RRM1;DPYSL4;DPYSL5;DPYSL2;DPYSL3;MAPK1;CRMP1;HPRT1;GART
proteasome-mediated ubiquitin-dependent protein catabolic process (GO:0043161)	18/205	0.00018531107648812276	0.006844476643275599	-2.0983892133368274	10.459029225613282	PSMD12;UBXN1;PSMD13;CUL3;PSMA6;PSMC5;PSMD6;PSMC6;PSMA1;PSMD4;TBL1XR1;PSMC1;PSMD3;PSMC2;PSMD1;STUB1;TBL1X;SKP1
ribonucleoside monophosphate metabolic process (GO:0009161)	28/416	0.00026549016697041645	0.008873375267022242	-2.1871685036778645	10.333715092501588	ABCD3;ATP5H;ATP5L;PSMD6;KIF5C;ASNA1;DHX57;FIGNL1;KIF5A;DHX36;ATP6V1H;DHX16;KIF21A;KIF1B;KIF3C;NSF;RFC3;MYO10;ABCA7;PSMC5;PSMC6;KIF2A;PSMC1;PSMC2;SKIV2L;HPRT1;ABCE1;GART
protein catabolic process (GO:0030163)	21/269	0.00025322012376723124	0.008573309904690542	-2.1637687137910016	10.297594717283719	PSMD12;LRSAM1;UBXN1;PSMD13;CUL3;TRAF2;MTOR;PSMA6;PSMD6;PSMC5;PSMC6;PSMA1;PSMD4;TBL1XR1;PSMC1;PSMD3;PSMC2;PSMD1;STUB1;TBL1X;SKP1
regulation of DNA-templated transcription, elongation (GO:0032784)	8/44	0.00017092653291693908	0.006396250784418089	-2.0328866087230573	10.270231120859304	DAB2;LDB1;CTR9;TCEB1;WDR61;NELFA;HTATSF1;SUPT6H
ATP metabolic process (GO:0046034)	26/377	0.0003083927374545982	0.009833448828714206	-2.17096619020221	10.034130961042774	ABCD3;ATP5H;ATP5L;PSMD6;KIF5C;FIGNL1;ASNA1;DHX57;DHX36;KIF5A;ATP6V1H;DHX16;KIF21A;KIF1B;KIF3C;NSF;RFC3;MYO10;ABCA7;PSMC5;PSMC6;KIF2A;PSMC1;PSMC2;SKIV2L;ABCE1
regulation of transcription elongation from RNA polymerase II promoter (GO:0034243)	6/25	0.00031118508951627233	0.009833448828714206	-2.1529921753684453	9.95105568352271	DAB2;CTR9;TCEB1;WDR61;NELFA;SUPT6H
cytoskeleton-dependent intracellular transport (GO:0030705)	12/104	0.00023287220328363915	0.007979380073959876	-2.0348444322105768	9.830118888866728	UXT;MYO10;NME7;KIF5C;DCTN1;MAP1B;KIF5A;AP3D1;KIF1B;KIF3C;COPG1;AP3B2
negative regulation of intracellular transport (GO:0032387)	12/104	0.00023287220328363915	0.007979380073959876	-2.0344455719389627	9.828192036952181	PPM1B;GDI1;SAR1A;CDK5;FAM89B;PKIA;MAP1B;PARK7;SRI;EMD;UACA;MTOR
regulation of protein ubiquitination (GO:0031396)	18/212	0.0002714429142865454	0.008873375267022242	-2.0757036733055925	9.807077205222134	PSMD12;UBXN1;PSMD13;PARK7;PSMA6;PSMD6;PSMC5;PSMC6;PSMA1;PSMD4;CDK5;PSMC1;PSMD3;PSMC2;PSMD1;STUB1;VPS28;SKP1
proteasomal protein catabolic process (GO:0010498)	18/212	0.0002714429142865454	0.008873375267022242	-2.069926576329142	9.779782154970631	PSMD12;UBXN1;PSMD13;CUL3;PSMA6;PSMD6;PSMC5;PSMC6;PSMA1;PSMD4;TBL1XR1;PSMC1;PSMD3;PSMC2;PSMD1;STUB1;TBL1X;SKP1
negative regulation of intracellular protein transport (GO:0090317)	10/73	0.00022147095898351278	0.007873292591863878	-1.9992488031373745	9.68491885588398	PPM1B;CDK5;FAM89B;GDI1;PKIA;PARK7;SRI;EMD;UACA;MTOR
negative regulation of cell cycle (GO:0045786)	28/430	0.0004373385423271686	0.013231817174239015	-2.2389278071383445	9.683655970792449	PSMD12;PSMD13;NPR2;CUL3;FHL1;PPM1G;SART1;PSMD6;PSMD4;CASP3;PSMD3;PSMD1;E4F1;PRKACB;INTS3;CSNK2A2;SCRIB;MIF;PA2G4;PSMA6;PSMC5;PSMC6;CDK6;STAG2;CDK5;PSMA1;PSMC1;PSMC2
antigen processing and presentation of peptide antigen via MHC class I (GO:0002474)	12/104	0.00023287220328363915	0.007979380073959876	-1.982221453531976	9.575902827673795	PSMA6;PSMD12;PSMD6;PSMC5;PSMC6;PSMA1;PSMD4;PSMD13;PSMC1;PSMD3;PSMC2;PSMD1
nucleoside monophosphate metabolic process (GO:0009123)	28/427	0.00039391693579988665	0.012310986433130524	-2.1690545770759035	9.537903890803076	ABCD3;ATP5H;ATP5L;PSMD6;KIF5C;ASNA1;DHX57;FIGNL1;KIF5A;DHX36;ATP6V1H;DHX16;KIF21A;KIF1B;KIF3C;NSF;RFC3;MYO10;ABCA7;PSMC5;PSMC6;KIF2A;PSMC1;PSMC2;SKIV2L;HPRT1;ABCE1;GART
regulation of cell cycle process (GO:0010564)	30/481	0.0005408893024235681	0.015720022511473218	-2.210833318670371	9.181192954990193	CUL7;PSMD12;PSMD13;CUL3;FHL1;CCP110;CTCF;PKHD1;PSMD6;PSMD4;PSMD3;PSMD1;E4F1;ILKAP;RANBP1;INTS3;CSNK2A2;PLRG1;MIF;PBX1;PSMA6;DYNC1LI1;PSMC5;STAG2;PSMC6;PSMA1;CDK5;PSMC1;PKIA;PSMC2
negative regulation of nucleocytoplasmic transport (GO:0046823)	9/62	0.00030903378816325217	0.009833448828714206	-1.973083327566311	9.119523185207395	PPM1B;CDK5;FAM89B;PKIA;PARK7;SRI;EMD;UACA;MTOR
microtubule cytoskeleton organization (GO:0000226)	19/245	0.0005311975875821978	0.015720022511473218	-2.1556387809902806	8.951979971712397	RANBP1;CUL7;SEH1L;DYNLT1;DCTN2;DOCK7;CSNK1D;CKAP5;UXT;DYNC1LI2;KIF2A;HAUS8;MAP2;MAP1B;PARD3;TBCE;MAP7;ARHGEF2;CLASP2
positive regulation of transcription elongation from RNA polymerase II promoter (GO:0032968)	5/14	0.0002176124959001741	0.007834049852406266	-1.8181383156646103	8.816653917325564	DAB2;CTR9;TCEB1;WDR61;SUPT6H
positive regulation of protein ubiquitination (GO:0031398)	14/146	0.00042059944158734353	0.013002008824721793	-2.009091086255225	8.724782235490375	PSMD12;PSMD13;PSMA6;PSMD6;PSMC5;PSMC6;PSMA1;PSMD4;PSMC1;PSMD3;PSMC2;PSMD1;STUB1;SKP1
nucleobase catabolic process (GO:0046113)	5/10	0.00006221879762314197	0.0028087342927018374	-1.4377588275172388	8.446863774392405	DPYSL4;DPYSL5;DPYSL2;DPYSL3;CRMP1
organelle localization (GO:0051640)	13/129	0.00043418271085035576	0.013231817174239015	-1.9486904793831614	8.428341519427624	DCTN2;DCTN1;VPS33A;DOCK7;VPS33B;FNBP1L;UXT;DYNC1LI2;MYO1A;MAP1B;PARD3;KIT;KIF1B
regulation of mitotic cell cycle phase transition (GO:1901990)	19/251	0.0006983107710483496	0.019663325077836694	-2.143018817701931	8.419921040782157	PSMD12;PSMD13;CUL3;INTS3;CSNK2A2;FHL1;PLRG1;PBX1;PSMA6;PSMD6;PSMC5;PSMC6;PSMA1;PSMD4;PSMC1;PKIA;PSMD3;PSMC2;PSMD1
regulation of protein modification by small protein conjugation or removal (GO:1903320)	18/228	0.0006083934616031365	0.01747748489696283	-2.0580121368590207	8.32844954800471	PSMD12;UBXN1;PSMD13;PARK7;PSMA6;PSMD6;PSMC5;PSMC6;PSMA1;CDK5;PSMD4;PSMC1;PSMD3;PSMC2;PSMD1;STUB1;VPS28;SKP1
endosomal transport (GO:0016197)	16/187	0.0005416885394248859	0.015720022511473218	-1.989468138197257	8.261903192945987	KIAA0196;AP3D1;KIAA1033;VPS37B;LMAN1;VPS51;SNX27;CHMP2A;FAM21C;VPS35;SNX9;WASH1;ERC1;SQSTM1;SCYL2;VPS28
pyrimidine-containing compound metabolic process (GO:0072527)	10/81	0.0004705873131401922	0.014087898090217965	-1.9344061654909752	8.245288555569996	NT5C3A;RRM1;DPYSL4;NME7;DPYSL5;DPYSL2;DPYSL3;CTPS2;MAPK1;CRMP1
single-organism cellular localization (GO:1902580)	30/496	0.0008631416671764284	0.023666254767539488	-2.073683284440513	7.763258677270231	TMED10;DCTN2;DCTN1;SRP54;FNBP1L;IPO7;GPHN;UXT;IPO9;SRP72;MYO18A;MAP7;MAPK1;KPNA4;KIF1B;KPNA3;TNPO3;KPNA1;NDC1;OSBPL8;SSR4;AP3D1;SRP68;CDK5;NME7;MAP1B;PARD3;TOMM70A;KIT;FERMT2
positive regulation of cell cycle process (GO:0090068)	17/220	0.001065002125478074	0.028574207970373983	-2.175301725018948	7.7337431703964645	RANBP1;PSMD12;PSMD13;CUL3;PLRG1;PBX1;PSMA6;DYNC1LI1;PSMD6;PSMC5;PSMC6;PSMA1;PSMD4;PSMC1;PSMD3;PSMC2;PSMD1
regulation of mitotic cell cycle (GO:0007346)	25/391	0.0011148267318842936	0.029457108759919855	-2.189923304424928	7.719085492507157	CUL7;PSMD12;PSMD13;CUL3;FHL1;PSMD6;PSMD4;PSMD3;PSMD1;E4F1;RANBP1;INTS3;CSNK2A2;ASNS;SCRIB;PLRG1;PBX1;PSMA6;DYNC1LI1;PSMC5;PSMC6;PSMA1;PSMC1;PKIA;PSMC2
positive regulation of protein modification by small protein conjugation or removal (GO:1903322)	14/158	0.0008654326637918799	0.023666254767539488	-2.009305212772505	7.522246162363726	PSMD12;PSMD13;PSMA6;PSMC5;PSMD6;PSMC6;PSMA1;PSMD4;PSMC1;PSMD3;PSMC2;PSMD1;STUB1;SKP1
regulation of cell cycle phase transition (GO:1901987)	19/264	0.001221375137261392	0.03157809900337635	-2.109161462590391	7.287767606716088	PSMD12;PSMD13;CUL3;INTS3;CSNK2A2;FHL1;PLRG1;PBX1;PSMA6;PSMD6;PSMC5;PSMC6;PSMA1;PSMD4;PSMC1;PKIA;PSMD3;PSMC2;PSMD1
mitotic nuclear division (GO:0007067)	18/240	0.001055959461959948	0.028574207970373983	-2.022092657359862	7.189046511986493	PPP1R12A;DYNLT1;DCTN2;DCTN1;CDK11B;CKAP5;SEPT2;DYNC1LI1;STAG2;KIF2A;HAUS8;SNX9;E4F1;SSSCA1;ARHGEF2;FSD1;MAPRE1;CLASP2
cell part morphogenesis (GO:0032990)	18/248	0.001490107922240423	0.03750324717567932	-2.1179868416510885	6.95404498912561	FARP1;DBNL;DYNLT1;DOCK7;PTPN23;ISL1;TROVE2;CDK5;MAP2;PARD3;TBCE;DCX;S100A6;HPRT1;SSBP1;CTNNA2;DNM1L;NES
positive regulation of organelle organization (GO:0010638)	22/340	0.0018882646928012417	0.04551037954514179	-2.211638799151777	6.833554420312384	RNF20;CYFIP1;RANBP1;C2CD5;CTBP1;CUL3;ARPC1B;CTR9;BRK1;WDR61;ARPC5;DYNLL1;MTOR;LMAN1;ABI2;CDK5;DHX36;WASH1;SYNPO;DNM1L;NES;PFN2
dendrite morphogenesis (GO:0048813)	6/34	0.0012847914594403156	0.032918440636470786	-1.9816324797682148	6.764742932228188	FARP1;CDK5;MAP2;DCX;HPRT1;CTNNA2
Golgi organization (GO:0007030)	8/57	0.0008097006833734869	0.022576360230531344	-1.7789896247311958	6.743886248181858	LMAN1;CUL7;TMED10;CTBP1;COG4;COG2;MYO18A;COG1
pyrimidine nucleobase catabolic process (GO:0006208)	5/8	0.000028059994718230345	0.0015346658649739826	-1.0276914877920622	6.658868004814099	DPYSL4;DPYSL5;DPYSL2;DPYSL3;CRMP1
positive regulation of cell cycle (GO:0045787)	19/278	0.0021270797278642234	0.04999516319046158	-2.206331634563163	6.609792326265867	SRPK2;RANBP1;PSMD12;PSMD13;CUL3;ASNS;PLRG1;PBX1;PSMA6;DYNC1LI1;PSMD6;PSMC5;PSMC6;PSMA1;PSMD4;PSMC1;PSMD3;PSMC2;PSMD1
regulation of mRNA metabolic process (GO:1903311)	9/76	0.001171148441540555	0.030557304291204943	-1.8627636002517012	6.497601700273447	TNRC6C;SRPK2;RBM15B;TIA1;ZC3HAV1;SUPT6H;CDK11B;RBM11;SRPK1
positive regulation of Rac GTPase activity (GO:0032855)	7/46	0.0011186243832880958	0.029457108759919855	-1.8421198038297641	6.493140752678771	VAV3;FARP1;DOCK4;DOCK7;SCRIB;ARHGEF2;ARHGEF7
negative regulation of mitotic cell cycle phase transition (GO:1901991)	15/192	0.0018606066896047456	0.045227054916546126	-2.0330965598981843	6.294588551204771	PSMD12;PSMD13;INTS3;CSNK2A2;FHL1;PSMA6;PSMD6;PSMC5;PSMC6;PSMA1;PSMD4;PSMC1;PSMD3;PSMC2;PSMD1
pyrimidine-containing compound catabolic process (GO:0072529)	6/35	0.0014666557654268281	0.03724258032923124	-1.912429353211408	6.292471158038804	NT5C3A;DPYSL4;DPYSL5;DPYSL2;DPYSL3;CRMP1
regulation of cytoskeleton organization (GO:0051493)	22/350	0.0026421280785590535	0.05824970740637169	-2.1709146375489827	6.171945504243366	RANBP1;CYFIP1;DYNLT1;ARPC1B;BRK1;ARPC5;MTOR;CORO1B;PKHD1;CDK5;ABI2;MAPK1;WASH1;ARHGEF2;SYNPO;FKBP4;MAPRE1;S100A9;NES;S100A8;PFN2;CLASP2
positive regulation of DNA-templated transcription, elongation (GO:0032786)	5/24	0.0017256466551611657	0.04234652068894689	-1.949576881168474	6.164306737536166	DAB2;CTR9;TCEB1;WDR61;SUPT6H
nuclear division (GO:0000280)	20/298	0.0020084516095984196	0.047600303147482544	-2.0238748413478094	6.162529188218536	PPP1R12A;DCTN2;DYNLT1;PSMD13;DCTN1;RPA1;CDK11B;CKAP5;SEPT2;DYNC1LI1;STAG2;KIF2A;HAUS8;E4F1;SNX9;SSSCA1;ARHGEF2;FSD1;MAPRE1;CLASP2
regulation of nucleocytoplasmic transport (GO:0046822)	14/178	0.0024599505434605563	0.05508739642206159	-2.053825159305516	5.953698877681432	PPP1R12A;FAM89B;PARK7;SRI;UACA;SUPT6H;MTOR;CHERP;PPM1B;DAB2;CDK5;PKIA;EMD;KPNA1
organelle fission (GO:0048285)	21/325	0.0024104547693176957	0.05484266691151621	-2.0428769413779966	5.931057647097475	PPP1R12A;DCTN2;DYNLT1;PSMD13;DCTN1;RPA1;CDK11B;CKAP5;SEPT2;DYNC1LI1;STAG2;KIF2A;HAUS8;E4F1;SNX9;SSSCA1;ARHGEF2;FSD1;MAPRE1;DNM1L;CLASP2
negative regulation of mitotic cell cycle (GO:0045930)	16/219	0.0025143719280914007	0.05586620127728081	-2.0253501821067355	5.842721516580919	PSMD12;PSMD13;INTS3;CSNK2A2;FHL1;SCRIB;PSMA6;PSMD6;PSMC5;PSMC6;PSMA1;PSMD4;PSMC1;PSMD3;PSMC2;PSMD1
negative regulation of cell cycle phase transition (GO:1901988)	15/200	0.002685016648752547	0.0583067976155682	-1.9917236158791398	5.660551403938338	PSMD12;PSMD13;INTS3;CSNK2A2;FHL1;PSMA6;PSMD6;PSMC5;PSMC6;PSMD4;PSMA1;PSMC1;PSMD3;PSMC2;PSMD1
negative regulation of protein binding (GO:0032091)	7/50	0.0017272139240217437	0.04234652068894689	-1.7683542148930185	5.591304403795667	EPB41L5;DAB2;KDM1A;CARM1;PARK7;NES;ISL1
negative regulation of protein import into nucleus (GO:0042308)	7/53	0.0023321116906092907	0.05392297274872213	-1.8759677658523681	5.478198596036545	PPM1B;FAM89B;PKIA;SRI;EMD;UACA;MTOR
protein localization to nucleus (GO:0034504)	10/101	0.0021932486311285466	0.051127861532209724	-1.837203454740802	5.462787959076788	OSBPL8;IPO9;MAPK1;KPNA4;ABCA7;PLRG1;KPNA3;IPO7;TNPO3;KPNA1
regulation of histone methylation (GO:0031060)	6/40	0.002685720987214991	0.0583067976155682	-1.9179619746319947	5.450918120188762	RNF20;KDM1A;CTR9;WDR61;CTCF;SUPT6H
positive regulation of cytoskeleton organization (GO:0051495)	12/142	0.0028522332033609744	0.061452660836050076	-1.9475899398188727	5.432779044700383	RANBP1;CYFIP1;CDK5;ABI2;ARPC1B;BRK1;WASH1;ARPC5;SYNPO;NES;MTOR;PFN2
negative regulation of protein modification process (GO:0031400)	24/407	0.0037460137311431407	0.07797795372657494	-2.1244880220859965	5.420268191477768	PSMD12;UBXN1;KDM1A;CTBP1;PSMD13;PARK7;SUPT6H;PSMA6;PSMD6;PSMC5;PSMC6;PSMA1;PSMD4;CDK5;PRKAR2B;PSMC1;PARD3;CASP3;PKIA;PRKAR2A;PSMD3;PSMC2;PSMD1;VPS28
regulation of protein targeting (GO:1903533)	13/167	0.0037563219622154596	0.07797795372657494	-2.0831426369843813	5.3147825057968285	C2CD5;GDI1;FAM89B;SRI;UACA;MTOR;CHERP;DAB2;PPM1B;CDK5;PKIA;EMD;KPNA1
cell projection morphogenesis (GO:0048858)	16/228	0.003643837664429268	0.07733637550475253	-2.0414364616004277	5.225242104982465	FARP1;DBNL;DYNLT1;DOCK7;PTPN23;ISL1;TROVE2;CDK5;MAP2;PARD3;TBCE;S100A6;DCX;HPRT1;CTNNA2;NES
regulation of mRNA processing (GO:0050684)	8/69	0.002452655870690896	0.05508739642206159	-1.787185884737235	5.180755795087311	TNRC6C;SRPK2;RBM15B;TIA1;CDK11B;SUPT6H;RBM11;SRPK1
cellular component morphogenesis (GO:0032989)	25/437	0.00451004163488597	0.08725549938514082	-2.0555935395366345	5.0134172795948775	CUL7;CUL3;DOCK7;PTPN23;TROVE2;EPB41L5;MAP2;MAP7;CTNNA2;DNM1L;FARP1;DBNL;DYNLT1;ISL1;DAB2;CDK5;PARD3;TBCE;DCX;S100A6;HPRT1;ARHGEF2;SSBP1;NES;FERMT2
negative regulation of cell cycle process (GO:0010948)	17/254	0.004346302117877231	0.08524747050512307	-2.0284362092923924	4.994409214017851	PSMD12;PSMD13;INTS3;CSNK2A2;FHL1;MIF;PSMA6;PSMD6;PSMC5;STAG2;PSMC6;PSMA1;PSMD4;PSMC1;PSMD3;PSMC2;PSMD1
actin cytoskeleton organization (GO:0030036)	17/253	0.004188565364357379	0.08272416594605825	-1.9689068870553612	4.906995406082593	TMOD1;SHC1;LIMCH1;RAP1GDS1;BRK1;CDC42BPB;ARPC5;DYNLL1;CORO1B;CNN3;EPB41L5;CDK5;KIT;MYO18A;ARFIP2;PFDN1;PFN2
regulation of protein binding (GO:0043393)	11/128	0.003737577672702947	0.07797795372657494	-1.8661719905437666	4.761218973707953	EPB41L5;VTN;DAB2;KDM1A;CDK5;CARM1;TRAF2;PARK7;MAPRE1;ISL1;NES
actin filament-based process (GO:0030029)	19/303	0.005143190543575379	0.09325798354872109	-1.955755027162593	4.6398050824596115	TMOD1;SHC1;LIMCH1;RAP1GDS1;BRK1;CDC42BPB;ARPC5;DYNLL1;FNBP1L;CORO1B;CNN3;EPB41L5;CDK5;PARD3;KIT;MYO18A;ARFIP2;PFDN1;PFN2
negative regulation of transferase activity (GO:0051348)	18/284	0.005755081058541114	0.1022965658155683	-2.0334053701433485	4.635918560424006	PSMD12;PSMD13;IRS2;PARK7;PSMA6;PSMD6;PSMC5;PSMC6;PSMA1;PSMD4;PRKAR2B;PSMC1;CASP3;PKIA;PRKAR2A;PSMD3;PSMC2;PSMD1
antigen processing and presentation of exogenous peptide antigen via MHC class II (GO:0019886)	9/93	0.004128857852144327	0.08231680185870646	-1.8318524253524213	4.574465309745332	DYNC1I2;DYNC1LI2;KIF2A;DCTN2;DCTN1;KIF5A;KIF3C;DYNLL1;DNM2
negative regulation of protein localization to nucleus (GO:1900181)	7/59	0.0040193106842201405	0.08164942561372915	-1.8112582900615204	4.537782514611426	PPM1B;FAM89B;PKIA;SRI;EMD;UACA;MTOR
establishment of vesicle localization (GO:0051650)	9/95	0.004694905652826263	0.08901541117758593	-1.8582072519312984	4.49490256244302	DCTN2;CDK5;DCTN1;DPYSL2;AP3D1;SCRIB;FNBP1L;AP3B2;DNM2
microtubule-based transport (GO:0010970)	9/95	0.004694905652826263	0.08901541117758593	-1.8516772200881704	4.4791067695711515	UXT;NME7;DCTN1;MAP1B;AP3D1;KIF1B;KIF3C;COPG1;AP3B2
antigen processing and presentation of peptide antigen via MHC class II (GO:0002495)	9/94	0.004404798067460256	0.08580305276614361	-1.8129949835354788	4.452173037647992	DYNC1I2;DYNC1LI2;KIF2A;DCTN2;DCTN1;KIF5A;KIF3C;DYNLL1;DNM2
neuron projection morphogenesis (GO:0048812)	13/175	0.005412004487633051	0.09680340102407796	-1.877352772945019	4.383756054628553	FARP1;DBNL;DYNLT1;DOCK7;ISL1;CDK5;MAP2;PARD3;TBCE;DCX;S100A6;HPRT1;CTNNA2
negative regulation of binding (GO:0051100)	9/95	0.004694905652826263	0.08901541117758593	-1.8002945903764584	4.354814975038442	EPB41L5;DAB2;KDM1A;CARM1;YBX2;PARK7;SRI;ISL1;NES
antigen processing and presentation of peptide or polysaccharide antigen via MHC class II (GO:0002504)	9/96	0.0049996605738310525	0.09325798354872109	-1.8273111318641826	4.335086633605061	DYNC1I2;DYNC1LI2;DCTN2;KIF2A;DCTN1;KIF5A;KIF3C;DYNLL1;DNM2
axon extension (GO:0048675)	5/30	0.0040568057229649285	0.08182663458235642	-1.7060691655205944	4.270551266529512	CYFIP1;PPP3CB;CDK5;MAP1B;DCX
regulation of actin nucleation (GO:0051125)	4/14	0.001907897813854624	0.04559715447565169	-1.3524269786213339	4.176172745921845	CYFIP1;ABI2;BRK1;CORO1B
positive regulation of viral process (GO:0048524)	8/81	0.005991167802398319	0.10517827919765939	-1.8428500772227163	4.150279842120331	SRPK2;VAPB;CHMP2A;TCEB2;TCEB1;PPIH;NELFA;SRPK1
histone ubiquitination (GO:0016574)	5/32	0.005180999086040061	0.09325798354872109	-1.6631231059706684	3.9455693236968994	CBX8;RNF20;CTR9;RNF2;SKP1
establishment or maintenance of cell polarity (GO:0007163)	9/100	0.0063749204798788876	0.11122867389432856	-1.783987517219816	3.9179346415413154	SNX27;MAP1B;PARD3;DOCK7;MAP7;SCRIB;CDC42BPB;CKAP5;CLASP2
positive regulation of lamellipodium organization (GO:1902745)	4/15	0.002358640565223009	0.05409656264108256	-1.3272766662679039	3.8716456382895355	BRK1;ARHGEF7;CORO1B;MTOR
negative regulation of protein transport (GO:0051224)	10/122	0.007537897915322545	0.12610459806574895	-1.8638793818823063	3.8594298629979837	PPM1B;GDI1;CDK5;FAM89B;PKIA;PARK7;SRI;EMD;UACA;MTOR
positive regulation of viral genome replication (GO:0045070)	4/18	0.004138995311460979	0.08231680185870646	-1.5424846319693182	3.8518618323752047	SRPK2;VAPB;PPIH;SRPK1
positive regulation of multi-organism process (GO:0043902)	10/123	0.007934678286895985	0.13044060721348083	-1.860980207116507	3.7905138500858686	SRPK2;VAPB;CHMP2A;TCEB2;TCEB1;PPIH;NELFA;MIF;ZC3HAV1;SRPK1
lamellipodium assembly (GO:0030032)	5/33	0.005818557936826732	0.10278247684680264	-1.6524894325776884	3.759645467274701	VAV3;CYFIP1;KIT;ARFIP2;ARHGEF7
Rac protein signal transduction (GO:0016601)	4/17	0.0034694892351014497	0.0741896795836731	-1.4253990491278157	3.7076485531519583	CYFIP1;DBNL;ABI2;BRK1
membrane budding (GO:0006900)	4/13	0.001520469921370663	0.03793172330156285	-1.1280112810362222	3.690816240556395	LRSAM1;TMED10;MYO18A;FNBP1L
multi-organism transport (GO:0044766)	5/32	0.005180999086040061	0.09325798354872109	-1.5509432950766504	3.6794355546376156	DYNLT1;VPS37B;KPNA3;VPS28;KPNA1
transport of virus (GO:0046794)	5/32	0.005180999086040061	0.09325798354872109	-1.547268476832887	3.6707174687179975	DYNLT1;VPS37B;KPNA3;VPS28;KPNA1
multi-organism localization (GO:1902579)	5/32	0.005180999086040061	0.09325798354872109	-1.5434499128278858	3.661658362422969	DYNLT1;VPS37B;KPNA3;VPS28;KPNA1
multi-organism intracellular transport (GO:1902583)	5/32	0.005180999086040061	0.09325798354872109	-1.537900719615878	3.648493536301582	DYNLT1;VPS37B;KPNA3;VPS28;KPNA1
organelle transport along microtubule (GO:0072384)	5/35	0.007255799412694237	0.12210351201007343	-1.7245528041456077	3.626538180719798	UXT;MAP1B;KIF1B;COPG1;KIF3C
intracellular transport of virus (GO:0075733)	5/32	0.005180999086040061	0.09325798354872109	-1.5237615746006994	3.6149500321346846	DYNLT1;VPS37B;KPNA3;VPS28;KPNA1
neuron projection extension (GO:1990138)	5/35	0.007255799412694237	0.12210351201007343	-1.6341909690288714	3.4365175305297893	CYFIP1;PPP3CB;CDK5;MAP1B;DCX
regulation of cellular response to stress (GO:0080135)	22/404	0.012428767133053398	0.18115162945392868	-2.0059877391018213	3.42707131168163	DBNL;KDM1A;DYRK1A;TRAF2;PARK7;BRCC3;MIF;MTOR;STK3;BABAM1;DAB2;LARP1;CDK6;STK24;BRE;FIGNL1;DVL2;MAPK1;ARHGEF2;EEF1E1;SQSTM1;PAFAH1B2
cell growth (GO:0016049)	9/106	0.008961506923975295	0.1423828250937751	-1.7490335604688503	3.409279002128933	CYFIP1;EPB41L5;PPP3CB;CDK5;MAP1B;DCX;NDNF;SLC3A2;MTOR
regulation of intracellular protein transport (GO:0033157)	14/219	0.013055580715203057	0.18472672414944025	-1.9708432709267298	3.3285132755914795	C2CD5;GDI1;FAM89B;PARK7;SRI;UACA;MTOR;CHERP;PPM1B;DAB2;CDK5;PKIA;EMD;KPNA1
vesicle localization (GO:0051648)	6/51	0.007846648031478935	0.1297434127995703	-1.6253376508182953	3.3192589051004293	DCTN2;MYO1A;DCTN1;VPS33A;VPS33B;FNBP1L
lamellipodium organization (GO:0097581)	5/36	0.008059847141245732	0.13078267537858249	-1.616332969750435	3.2879741059040097	VAV3;CYFIP1;KIT;ARFIP2;ARHGEF7
ruffle organization (GO:0031529)	4/21	0.0066570164806384466	0.1133685920415314	-1.4670128066753563	3.1938495603727657	CYFIP1;ARFIP2;CORO1B;MTOR
regulation of viral process (GO:0050792)	11/152	0.011963571803925438	0.17723959300522155	-1.8447852223009957	3.1919448496829603	SRPK2;VAPB;CHMP2A;TRIM25;TCEB2;PPIH;TCEB1;NELFA;ZC3HAV1;TRIM56;SRPK1
regulation of binding (GO:0051098)	14/218	0.012611822303754528	0.18115162945392868	-1.823347525146558	3.115044959075042	KDM1A;YBX2;EDF1;TRAF2;PARK7;SRI;ISL1;EPB41L5;VTN;DAB2;CDK5;CARM1;MAPRE1;NES
positive regulation of protein binding (GO:0032092)	6/53	0.009257649410410747	0.1462708606844898	-1.5864515397543788	3.049628125777451	EPB41L5;VTN;CDK5;TRAF2;PARK7;MAPRE1
regulation of protein localization to nucleus (GO:1900180)	11/156	0.01414226717300021	0.19899274531755917	-1.8564330942849965	2.997186931151595	DAB2;PPM1B;FAM89B;PKIA;PARK7;SRI;EMD;UACA;MTOR;KPNA1;CHERP
regulation of Arp2/3 complex-mediated actin nucleation (GO:0034315)	4/10	0.0006880260793491339	0.01956746169668937	-0.7588142578612285	2.985089703601712	CYFIP1;ABI2;BRK1;CORO1B
protein import into nucleus (GO:0006606)	7/71	0.00997506633303431	0.15498491762443936	-1.585526462060368	2.956099094155731	IPO9;MAPK1;KPNA4;KPNA3;IPO7;TNPO3;KPNA1
single-organism nuclear import (GO:1902593)	7/71	0.00997506633303431	0.15498491762443936	-1.5825994480749426	2.9506418888690695	IPO9;MAPK1;KPNA4;KPNA3;IPO7;TNPO3;KPNA1
positive regulation of binding (GO:0051099)	8/93	0.012498922524906324	0.18115162945392868	-1.7230831494340575	2.9437512074283685	EPB41L5;VTN;CDK5;EDF1;TRAF2;PARK7;MAPRE1;ISL1
regulation of intracellular transport (GO:0032386)	21/394	0.017662868490242276	0.2347345700292011	-2.007164931304403	2.9089839190269533	C2CD5;PPP1R12A;GDI1;SAR1A;FAM89B;PARK7;SRI;PTPN23;DYNLL1;UACA;SUPT6H;MTOR;CHERP;DAB2;PPM1B;CDK5;MAP1B;PKIA;MAPK1;EMD;KPNA1
histone H3-K4 methylation (GO:0051568)	4/25	0.011351419056621733	0.173193878633215	-1.6484431968679067	2.8902873724515175	WDR82;CTR9;WDR5;WDR61
embryonic hemopoiesis (GO:0035162)	4/24	0.010023726311863707	0.15498491762443936	-1.509620481138327	2.8145778980017027	TNRC6C;KIT;PBX1;STK3
histone monoubiquitination (GO:0010390)	4/22	0.007679924911998386	0.12772927748376264	-1.3578303400075964	2.7942006753117243	RNF20;CTR9;RNF2;SKP1
retrograde transport, endosome to Golgi (GO:0042147)	6/54	0.010027153601581167	0.15498491762443936	-1.4945288989988403	2.786440737658166	LMAN1;VPS51;FAM21C;WASH1;VPS35;ERC1
regulation of RNA splicing (GO:0043484)	7/73	0.01138792380605176	0.173193878633215	-1.5684698543300324	2.7500666220434096	SRPK2;RBM15B;RBFOX1;TIA1;CLK3;RBM11;SRPK1
neurotrophin TRK receptor signaling pathway (GO:0048011)	16/274	0.017562587177256842	0.2344976428737956	-1.8876337732169075	2.737653652242807	VAV3;SHC1;MAGED1;IRS2;PPP2R5D;MTOR;TNRC6C;PRKAR2B;PRKAR2A;CASP3;KIT;MAPK1;ARHGEF2;ARHGEF7;PRKACB;SQSTM1
synaptic vesicle transport (GO:0048489)	6/57	0.012607218420205084	0.18115162945392868	-1.5604975368576246	2.665986554289282	CDK5;DPYSL2;AP3D1;SCRIB;AP3B2;DNM2
establishment of synaptic vesicle localization (GO:0097480)	6/57	0.012607218420205084	0.18115162945392868	-1.5564819735731283	2.6591262821827835	CDK5;DPYSL2;AP3D1;SCRIB;AP3B2;DNM2
nuclear import (GO:0051170)	7/75	0.012940280164244837	0.18401078393556158	-1.54097922647687	2.6085094050141984	IPO9;MAPK1;KPNA4;KPNA3;IPO7;TNPO3;KPNA1
neuron projection development (GO:0031175)	10/137	0.015344147836283482	0.21391547277642267	-1.6800821283096634	2.590979528914823	HERC1;CDK5;ABI2;PRMT1;MAP2;MAP1B;DOCK7;STRN;ISL1;SEPT2
neurotrophin signaling pathway (GO:0038179)	16/278	0.019701784105476572	0.25188097619516464	-1.8675947224630518	2.5750370255531183	VAV3;SHC1;MAGED1;PPP2R5D;IRS2;MTOR;TNRC6C;PRKAR2B;CASP3;PRKAR2A;KIT;MAPK1;ARHGEF2;ARHGEF7;SQSTM1;PRKACB
actomyosin structure organization (GO:0031032)	6/57	0.012607218420205084	0.18115162945392868	-1.4903111183115654	2.546078612291303	TMOD1;EPB41L5;LIMCH1;MYO18A;CDC42BPB;CNN3
melanosome localization (GO:0032400)	4/25	0.011351419056621733	0.173193878633215	-1.4354409823942829	2.516821297328604	DCTN2;DCTN1;VPS33A;VPS33B
nervous system development (GO:0007399)	16/277	0.019149226023634627	0.25188097619516464	-1.7750153675273455	2.4473887387519735	GPSM1;DCTN1;GPR98;DYRK1A;CRMP1;PPP2R5D;MSI1;CHERP;ELAVL3;KIF2A;DPYSL4;DPYSL5;DPYSL2;MAP1B;DCX;ARHGEF7
regulation of protein import into nucleus (GO:0042306)	10/143	0.01975016093232128	0.25188097619516464	-1.7722300859301405	2.443548396330179	DAB2;PPM1B;FAM89B;PKIA;SRI;EMD;UACA;MTOR;KPNA1;CHERP
glutamine metabolic process (GO:0006541)	4/23	0.00880099162041899	0.14061809083411017	-1.2262837185972884	2.4056101384477917	ASNSD1;CTPS2;ASNS;GLUL
pigment granule localization (GO:0051875)	4/26	0.012787135344047618	0.18274679858528353	-1.382957662130667	2.3505491053188106	DCTN2;DCTN1;VPS33A;VPS33B
positive regulation of cell adhesion (GO:0045785)	11/171	0.025042024298459295	0.2946299836518182	-1.7830500574336674	2.1789495816280575	VAV3;EPB41L5;VTN;DAB2;CDK6;LDB1;MYO10;EMILIN1;NDNF;PTPN23;ARHGEF7
epidermal growth factor receptor signaling pathway (GO:0007173)	12/193	0.02469017541203482	0.2946299836518182	-1.760893999681977	2.151874103535167	TNRC6C;ARF4;SHC1;PRKAR2B;PRKAR2A;KIT;MAPK1;IRS2;EPS15L1;ARHGEF7;PRKACB;MTOR
regulation of mRNA splicing, via spliceosome (GO:0048024)	5/44	0.016809858341925048	0.22550583549261716	-1.4417033684373315	2.1472863216895015	SRPK2;RBM15B;TIA1;RBM11;SRPK1
regulation of DNA damage response, signal transduction by p53 class mediator (GO:0043516)	4/28	0.01599375715684326	0.2208070162818555	-1.4131667551137916	2.1345406022342357	KDM1A;DYRK1A;MIF;EEF1E1
regulation of intrinsic apoptotic signaling pathway (GO:2001242)	9/126	0.023445955254736323	0.2911803351286904	-1.721148437752374	2.123574448944904	KDM1A;PRKRA;FIGNL1;MIF;PARK7;ARHGEF2;DNM1L;S100A9;S100A8
neutrophil chemotaxis (GO:0030593)	5/44	0.016809858341925048	0.22550583549261716	-1.421136405276901	2.116653696671116	VAV3;DPYSL3;PDE4B;S100A9;S100A8
regulation of lamellipodium organization (GO:1902743)	4/28	0.01599375715684326	0.2208070162818555	-1.3698693688978714	2.0691413643070335	BRK1;ARHGEF7;CORO1B;MTOR
positive regulation of sequence-specific DNA binding transcription factor activity (GO:0051091)	13/214	0.023331694169472686	0.29103218516658036	-1.676012549323605	2.0687381830806535	RNF31;CRTC3;KDM1A;TRAF2;PARK7;PSMA6;KIT;DVL2;TRIM25;ERC1;ARHGEF2;S100A9;S100A8
actin filament organization (GO:0007015)	10/150	0.025985824136484096	0.2977749472341581	-1.6811004424519984	2.0365141395494044	ENAH;ABI2;CUL3;ARPC1B;DPYSL3;ZYX;WASH1;ARHGEF2;ARPC5;CORO1B
ERBB signaling pathway (GO:0038127)	12/196	0.027239914352600803	0.30988126567518676	-1.7266230772806137	2.022853010987914	TNRC6C;ARF4;SHC1;PRKAR2B;PRKAR2A;KIT;MAPK1;IRS2;EPS15L1;ARHGEF7;PRKACB;MTOR
gene expression (GO:0010467)	31/672	0.027629139872721854	0.3113036932040698	-1.723989566687834	2.011872270825643	PSMD12;GTF3C4;PSMD13;RNMT;SRP54;PPP2R2A;EPRS;EDC3;NXF1;PSMD6;PSMD4;SRP72;LARS;XPO5;PSMD3;PSMD1;TCEB2;TCEB1;NELFA;SSR4;SRP68;TNRC6C;PSMA6;PSMC5;PSMC6;PSMA1;QARS;PRKRA;PSMC1;PSMC2;EEF1E1
neutrophil migration (GO:1990266)	5/45	0.01822084579694362	0.2410236532395705	-1.4033315966516218	1.9967446820109687	VAV3;DPYSL3;PDE4B;S100A9;S100A8
regulation of symbiosis, encompassing mutualism through parasitism (GO:0043903)	11/174	0.027802791165201738	0.3113036932040698	-1.685928554285358	1.9674555893493118	SRPK2;VAPB;CHMP2A;TCEB2;TRIM25;TCEB1;PPIH;NELFA;ZC3HAV1;TRIM56;SRPK1
regulation of macroautophagy (GO:0016241)	4/30	0.019663516726829196	0.25188097619516464	-1.4221235498892426	1.9608219876774071	LARP1;SQSTM1;MTOR;PAFAH1B2
protein monoubiquitination (GO:0006513)	5/46	0.01970778324262299	0.25188097619516464	-1.4170893941203846	1.9538809006517837	RNF20;CUL3;CTR9;RNF2;SKP1
positive regulation of translation (GO:0045727)	6/66	0.023072459345936203	0.2890664069596589	-1.552078516728515	1.926282839558299	LARP1;SAMD4A;MAPK1;LARP4B;MTOR;RBMS3
hematopoietic progenitor cell differentiation (GO:0002244)	8/106	0.02422098911837024	0.2946299836518182	-1.5751113331876858	1.9248411821969276	SERPINB12;CDK6;SP3;KIT;DOCK7;WDR7;ARHGEF7;SSBP3
receptor-mediated endocytosis (GO:0006898)	10/152	0.02800086469898639	0.312291996878107	-1.6279155814334532	1.894595244486818	LGALS3BP;VTN;DAB2;MAPK1;SNX9;FNBP1L;PRSS12;SCYL2;LRP1B;DNM2
positive regulation of cellular component biogenesis (GO:0044089)	14/249	0.032871609920071695	0.3488315619876265	-1.7747917627973748	1.8691505256885463	ARPC1B;BRK1;ARPC5;FNBP1L;MTOR;EPB41L5;PSMC5;KIT;DPYSL3;STUB1;SNX9;WASH1;SYNPO;PFN2
axonogenesis (GO:0007409)	8/109	0.027755210088203704	0.3113036932040698	-1.5636923984168982	1.824807665466252	MAP2;PARD3;DOCK7;TBCE;DCX;S100A6;CTNNA2;ISL1
developmental cell growth (GO:0048588)	5/49	0.02463804712783147	0.2946299836518182	-1.4264970789818479	1.7432293616674173	CYFIP1;PPP3CB;CDK5;MAP1B;DCX
establishment of cell polarity (GO:0030010)	5/49	0.02463804712783147	0.2946299836518182	-1.4095651752174785	1.7225379826061697	SNX27;MAP1B;PARD3;DOCK7;SCRIB
positive regulation of ATP catabolic process (GO:1903291)	4/30	0.019663516726829196	0.25188097619516464	-1.2437538224204596	1.714886053641257	DNAJB1;AHSA1;ABCA7;PFN2
positive regulation of ATPase activity (GO:0032781)	4/30	0.019663516726829196	0.25188097619516464	-1.2385663724037554	1.70773360471829	DNAJB1;AHSA1;ABCA7;PFN2
cytokine production (GO:0001816)	6/68	0.02600881708294326	0.2977749472341581	-1.3947610156549644	1.6896376075724746	SEH1L;KIT;DBH;S100A9;S100A8;TRIM56
negative regulation of microtubule polymerization or depolymerization (GO:0031111)	4/32	0.023812633396661603	0.2944483886091548	-1.3775935199643845	1.6843168416422711	ARHGEF2;FKBP4;MAPRE1;CLASP2
negative regulation of myeloid cell differentiation (GO:0045638)	6/69	0.02756596718971507	0.3113036932040698	-1.414613747394773	1.650834916466539	RBM15;CDK6;LDB1;PRMT1;CTR9;WDR61
positive regulation of proteolysis (GO:0045862)	13/228	0.03549551338914704	0.3725064209547387	-1.658749294094195	1.6380165930513408	HIP1;USP5;CUL3;PDCD6;CSNK1D;TRAF2;UACA;DAB2;CASP3;STUB1;SNX9;S100A9;S100A8
apoptotic signaling pathway (GO:0097190)	17/327	0.03720780078134494	0.380643832453759	-1.6815369870387835	1.6241817177719566	VAV3;HIP1;MAGED1;CUL3;PDCD6;TRAF2;DYNLL1;UACA;SART1;SGPL1;HINT1;STK24;CASP3;DPF2;ARHGEF2;ARHGEF7;SQSTM1
regulation of actin filament-based process (GO:0032970)	14/257	0.040670890618879366	0.3934286153744657	-1.6718584534156882	1.5596025826169355	CYFIP1;ARPC1B;BRK1;SRI;ARPC5;CORO1B;MTOR;CDK5;ABI2;PARD3;PDE4B;WASH1;SYNPO;PFN2
positive regulation of cell-substrate adhesion (GO:0010811)	7/93	0.034272823104540204	0.3610070700344901	-1.5220744699231528	1.5507773488419325	EPB41L5;VTN;DAB2;CDK6;NDNF;EMILIN1;ARHGEF7
negative regulation of transcription factor import into nucleus (GO:0042992)	4/33	0.026071013312695276	0.2977749472341581	-1.260010060382657	1.5263979707250892	PPM1B;SRI;UACA;MTOR
microtubule organizing center organization (GO:0031023)	6/70	0.0291835195931117	0.3204553271150953	-1.3221143799311903	1.5045825550270915	UXT;PPP1R12A;HAUS8;CCP110;CKAP5;CLASP2
regulation of proteasomal ubiquitin-dependent protein catabolic process (GO:0032434)	8/116	0.03735436191334838	0.3807734956328415	-1.541132017274478	1.4880409135855794	DAB2;UBXN1;USP5;CUL3;STUB1;CSNK1D;PARK7;UBQLN4
positive regulation of chromosome organization (GO:2001252)	6/72	0.032602833439346196	0.3472751247247213	-1.392915542414274	1.4732003339912392	RNF20;CTBP1;CUL3;CTR9;DHX36;WDR61
nuclear transport (GO:0051169)	12/209	0.0405268945402076	0.39337367942781715	-1.5430746136681701	1.4396813322192896	NXF1;RBM15B;IPO9;DYNLT1;CDK5;XPO5;MAPK1;KPNA4;KPNA3;IPO7;TNPO3;KPNA1
positive regulation of insulin secretion (GO:0032024)	5/51	0.02832834283243106	0.3147101836540388	-1.2425714923162219	1.4365407735678177	PPP3CB;IRS2;SRI;ISL1;GLUL
positive regulation of proteasomal ubiquitin-dependent protein catabolic process (GO:0032436)	5/52	0.03029773656294865	0.3314106260962537	-1.2940010008228522	1.4290909659593298	DAB2;USP5;CUL3;STUB1;CSNK1D
DNA strand elongation involved in DNA replication (GO:0006271)	4/33	0.026071013312695276	0.2977749472341581	-1.1710222152902088	1.4185965567212513	RFC3;RFC4;RPA1;MCM5
regulation of histone modification (GO:0031056)	7/97	0.041060022892204215	0.3958464579845044	-1.4896269661515074	1.3804803229248404	RNF20;KDM1A;CTBP1;CTR9;WDR61;CTCF;SUPT6H
hemopoiesis (GO:0030097)	7/95	0.03756566386320525	0.3815598143819848	-1.4187089116349205	1.3669085198118809	TNRC6C;SGPL1;SP3;KIT;RPA1;PBX1;STK3
histone methylation (GO:0016571)	6/74	0.036272313020219146	0.3737625298170408	-1.384880340107029	1.3629087014449235	PRMT1;WDR82;CARM1;CTR9;WDR5;WDR61
regulation of DNA metabolic process (GO:0051052)	14/265	0.04970394273689688	0.4274054294117746	-1.6029501033110976	1.362543225928072	SHC1;YLPM1;BRCC3;SUPT6H;BABAM1;RAD50;STAG2;BRE;CASP3;FIGNL1;DHX36;S100A11;KPNA1;ILKAP
regulation of cell projection organization (GO:0031344)	19/391	0.04961430042677953	0.4274054294117746	-1.6004759966891848	1.3604401802930597	CUL7;SKOR2;GDI1;MYO10;BRK1;NDNF;FNBP1L;MTOR;CORO1B;STK24;CDK5;TBC1D5;MAP1B;DPYSL3;KIT;FKBP4;ARHGEF7;PDLIM5;PFN2
regulation of cell projection assembly (GO:0060491)	8/120	0.04373492190159957	0.4012326383488683	-1.4716342466163639	1.3439168120324105	MYO10;TBC1D5;KIT;DPYSL3;BRK1;FNBP1L;MTOR;PFN2
granulocyte chemotaxis (GO:0071621)	5/53	0.03235117832985669	0.3458900419929039	-1.2636769965513992	1.3415629095495518	VAV3;DPYSL3;PDE4B;S100A9;S100A8
positive regulation of protein processing (GO:0010954)	13/240	0.04907336694985253	0.4274054294117746	-1.5651314249098767	1.3303965084708693	HIP1;USP5;CUL3;PDCD6;CSNK1D;TRAF2;UACA;DAB2;CASP3;STUB1;SNX9;S100A9;S100A8
positive regulation of protein maturation (GO:1903319)	13/240	0.04907336694985253	0.4274054294117746	-1.5625075994824762	1.32816619852252	HIP1;USP5;CUL3;PDCD6;CSNK1D;TRAF2;UACA;DAB2;CASP3;STUB1;SNX9;S100A9;S100A8
cellular component disassembly involved in execution phase of apoptosis (GO:0006921)	5/53	0.03235117832985669	0.3458900419929039	-1.2328761607279564	1.3088636841647243	DBNL;STK24;CASP3;DNM1L;KPNA1
macromolecule methylation (GO:0043414)	10/169	0.04977496523603365	0.4274054294117746	-1.5376776965536025	1.307060228994021	TRMT112;METTL14;PRMT1;WDR82;RNMT;CARM1;CTR9;WDR5;WDR61;CTCF
response to topologically incorrect protein (GO:0035966)	9/143	0.044994619131008336	0.41014325900188364	-1.451940718758467	1.2940403769684663	DNAJB1;CUL7;HSPH1;SHC1;VAPB;DCTN1;FAF2;ASNS;STUB1
spindle organization (GO:0007051)	6/74	0.036272313020219146	0.3737625298170408	-1.311269184004612	1.2904654135521578	RANBP1;DCTN2;HAUS8;KIF2A;CSNK1D;CKAP5
regulation of protein complex assembly (GO:0043254)	13/244	0.05430323836418707	0.4433222664083239	-1.5761590351352706	1.2821396645943246	SAR1A;STXBP1;ARPC1B;PARK7;ARPC5;MTOR;STUB1;SNX9;WASH1;FKBP4;MAPRE1;DNM1L;PFN2
myeloid leukocyte migration (GO:0097529)	6/76	0.04019677829442225	0.3915056077717016	-1.3293917300716622	1.2466443265578528	VAV3;KIT;DPYSL3;PDE4B;S100A9;S100A8
regulation of insulin secretion (GO:0050796)	10/169	0.04977496523603365	0.4274054294117746	-1.4598991017660066	1.2409466941864589	MARCKS;PPP3CB;PRKAR2B;PRKAR2A;STXBP1;IRS2;SRI;ISL1;GLUL;PRKACB
DNA strand elongation (GO:0022616)	4/35	0.030961567315380203	0.3360866314692416	-1.1213517935093045	1.2227066561085915	RFC3;RFC4;RPA1;MCM5
protein localization to organelle (GO:0033365)	19/396	0.05471382401874884	0.4433222664083239	-1.494081314097316	1.215372860371908	OSBPL8;COG7;SSR4;AP3D1;SRP54;ABCA7;PLRG1;SRP68;IPO7;IPO9;SRP72;TOMM70A;MAPK1;KPNA4;MAPRE1;DNM1L;KPNA3;TNPO3;KPNA1
mRNA processing (GO:0006397)	19/397	0.055776463096115336	0.4481024323315029	-1.512745585441036	1.2143314511645502	RBM17;RBFOX1;PRPF38A;RNMT;CELF2;ELAVL4;PLRG1;SUPT6H;SRPK1;WDR33;SART1;RBM15B;SYMPK;DHX16;PPIH;BCAS2;RBM10;SUGP2;RBM11
protein alkylation (GO:0008213)	7/101	0.048666461455129637	0.4274054294117746	-1.41820872061403	1.2055089433122133	TRMT112;PRMT1;WDR82;CARM1;CTR9;WDR5;WDR61
protein methylation (GO:0006479)	7/101	0.048666461455129637	0.4274054294117746	-1.4153983865766633	1.2031200968987787	TRMT112;PRMT1;WDR82;CARM1;CTR9;WDR5;WDR61
regulation of chromosome organization (GO:0033044)	10/172	0.05454071354934455	0.4433222664083239	-1.4777976711078276	1.2021267956693544	RNF20;KDM1A;CTBP1;CUL3;CTR9;DHX36;YLPM1;WDR61;CTCF;SUPT6H
granulocyte migration (GO:0097530)	5/55	0.036713314810494106	0.3769410372600911	-1.2180000814310157	1.1883618808421874	VAV3;DPYSL3;PDE4B;S100A9;S100A8
regulation of chromatin modification (GO:1903308)	7/102	0.0506987901376617	0.4274054294117746	-1.3842993975889026	1.176685264840715	RNF20;KDM1A;CTBP1;CTR9;WDR61;CTCF;SUPT6H
dendrite development (GO:0016358)	4/35	0.030961567315380203	0.3360866314692416	-1.075491896692819	1.17270165196044	ABI2;MAP2;MAP1B;STRN
regulation of response to DNA damage stimulus (GO:2001020)	8/124	0.050795722623480956	0.4274054294117746	-1.3781063129237692	1.1714210051855665	BABAM1;BRE;KDM1A;FIGNL1;DYRK1A;MIF;BRCC3;EEF1E1
positive regulation of actin filament polymerization (GO:0030838)	5/57	0.04142006215875099	0.3966284740050095	-1.2619197495373908	1.1669669389557562	ARPC1B;WASH1;ARPC5;MTOR;PFN2
positive regulation of kinase activity (GO:0033674)	22/480	0.06034398524684901	0.4624389049248879	-1.5098965538313545	1.1644938686958635	VAV3;CUL7;DBNL;SHC1;MAGED1;DCTN1;ASNS;TRAF2;PARK7;MIF;PIK3R6;STK3;DAB2;RAD50;CDK5;VAPB;PRKAR2B;PRKAR2A;KIT;DVL2;MAPK1;PRKACB
protein import (GO:0017038)	7/101	0.048666461455129637	0.4274054294117746	-1.3390338165229227	1.1382085145527623	IPO9;MAPK1;KPNA4;KPNA3;IPO7;TNPO3;KPNA1
regulation of viral genome replication (GO:0045069)	5/57	0.04142006215875099	0.3966284740050095	-1.2165268060240486	1.1249895752118448	SRPK2;VAPB;PPIH;ZC3HAV1;SRPK1
regulation of protein transport (GO:0051223)	18/379	0.06492984868761852	0.48723084345009776	-1.5615464793632459	1.122778866295061	C2CD5;GDI1;FAM89B;TRAF2;MIF;PARK7;SRI;UACA;MTOR;CHERP;DAB2;PPM1B;CDK5;PKIA;MYO18A;DNM1L;EMD;KPNA1
zymogen activation (GO:0031638)	7/102	0.0506987901376617	0.4274054294117746	-1.3027291060122492	1.1073487034623124	HIP1;PDCD6;CASP3;TRAF2;S100A9;PRSS12;S100A8
autophagy (GO:0006914)	7/102	0.0506987901376617	0.4274054294117746	-1.2971075815796813	1.1025702827122448	VPS51;ANXA7;PARK7;FNBP1L;S100A9;SQSTM1;S100A8
developmental growth involved in morphogenesis (GO:0060560)	6/79	0.04657026645574336	0.42314964153397483	-1.2799421129568618	1.1007878474453603	EPB41L5;CYFIP1;PPP3CB;CDK5;MAP1B;DCX
telomere maintenance via telomere lengthening (GO:0010833)	4/36	0.03359554152843443	0.3551885505831506	-1.0577878686897568	1.0949231007256452	RFC3;RAD50;RFC4;RPA1
positive regulation of receptor-mediated endocytosis (GO:0048260)	4/39	0.04225859941353507	0.3966624212632795	-1.1656012246985126	1.077796116461155	VTN;DAB2;HIP1;SCYL2
regulation of Rho GTPase activity (GO:0032319)	10/174	0.057879887316445874	0.4537506027874911	-1.3438184745441084	1.0618955244998598	VAV3;FARP1;DOCK4;DYNLT1;DOCK7;RAP1GDS1;SCRIB;ARHGEF2;ARHGEF7;MTOR
positive regulation of NF-kappaB transcription factor activity (GO:0051092)	8/126	0.05458694582663027	0.4433222664083239	-1.282095062743422	1.0429308826585593	RNF31;PSMA6;TRIM25;TRAF2;ARHGEF2;ERC1;S100A9;S100A8
positive regulation of proteasomal protein catabolic process (GO:1901800)	5/58	0.04390392799711319	0.401488010365884	-1.1279111239638049	1.0293064357054578	DAB2;USP5;CUL3;STUB1;CSNK1D
negative regulation of neuron death (GO:1901215)	9/155	0.06637807716780963	0.49087961409281433	-1.3902139646244622	0.9892155971831426	GPI;CDK5;STXBP1;NDNF;TRAF2;PARK7;ISL1;NES;CPEB4
regulation of chromatin organization (GO:1902275)	7/107	0.06165775635614371	0.4688627248044725	-1.2950974843466254	0.980965439133063	RNF20;KDM1A;CTBP1;CTR9;WDR61;CTCF;SUPT6H
regulation of vesicle-mediated transport (GO:0060627)	15/306	0.07096675853185369	0.5096703567287674	-1.4059576958005837	0.947603004313926	NSF;C2CD5;LRSAM1;HIP1;SAR1A;STXBP1;ABCA7;PTPN23;RUFY1;VTN;DAB2;CDK5;MAPK1;SCYL2;PFN2
regulation of multi-organism process (GO:0043900)	15/306	0.07096675853185369	0.5096703567287674	-1.400519917905701	0.9439379902915457	SRPK2;NPR2;ZC3HAV1;MIF;SRPK1;PPM1B;VAPB;CHMP2A;ATP6V1H;TRIM25;TCEB2;PPIH;TCEB1;NELFA;TRIM56
regulation of establishment of protein localization (GO:0070201)	20/442	0.07797229439836352	0.5242392559549548	-1.4491987283886398	0.9359028332274781	C2CD5;GDI1;FAM89B;TRAF2;PARK7;SRI;MIF;DYNLL1;UACA;MTOR;CHERP;EPB41L5;DAB2;PPM1B;CDK5;PKIA;MYO18A;DNM1L;EMD;KPNA1
activation of cysteine-type endopeptidase activity involved in apoptotic process (GO:0006919)	6/83	0.05599226393578459	0.4485690102348489	-1.1561915081714378	0.9269103385505966	HIP1;PDCD6;CASP3;TRAF2;S100A9;S100A8
regulation of peptide transport (GO:0090087)	12/231	0.07229454397013006	0.5140142076276247	-1.3626580433319875	0.9068548862097673	MARCKS;PPM1B;PPP3CB;PRKAR2B;PRKAR2A;STXBP1;IRS2;SRI;ISL1;GLUL;UACA;PRKACB
nucleocytoplasmic transport (GO:0006913)	11/204	0.06821814776963263	0.4974677237354749	-1.2908230581821247	0.9012844152793451	NXF1;RBM15B;IPO9;CDK5;XPO5;MAPK1;KPNA4;KPNA3;IPO7;TNPO3;KPNA1
regulation of lipid kinase activity (GO:0043550)	4/42	0.05206494101671279	0.43423076906607383	-1.0133716411264109	0.8453335046050415	VAV3;VAC14;KIT;PIK3R6
energy reserve metabolic process (GO:0006112)	9/158	0.07257708684178317	0.5147362468280083	-1.251723579445268	0.8312704447195282	PYGB;MARCKS;PRKAR2B;AGL;PRKAR2A;STXBP1;PPP2R5D;TKT;PRKACB
regulation of proteasomal protein catabolic process (GO:0061136)	8/135	0.07384747003331035	0.5163253461418383	-1.2525720551992696	0.8279729208056182	DAB2;UBXN1;USP5;CUL3;STUB1;CSNK1D;PARK7;UBQLN4
Wnt signaling pathway (GO:0016055)	12/234	0.07760302328459995	0.5229928867805741	-1.2692278746498564	0.8226975361454255	DAB2;LDB1;TBL1XR1;CUL3;CSNK2A2;CTR9;DVL2;CSNK1D;WDR61;STRN;TBL1X;FERMT2
regulation of sequence-specific DNA binding transcription factor activity (GO:0051090)	16/338	0.08018578692191446	0.5315813007131113	-1.290638082150612	0.815553078990713	RNF31;CRTC3;KDM1A;TRAF2;PARK7;PBX1;PKHD1;PSMA6;KIT;DVL2;TRIM25;MAPK1;ERC1;ARHGEF2;S100A9;S100A8
regulation of translation (GO:0006417)	13/264	0.08610174192385912	0.5433663564831042	-1.3292554082190378	0.8108079111046632	TIA1;SAMD4A;YBX2;PA2G4;LARP4B;EPRS;MTOR;PUM2;TNRC6C;LARP1;LARS;MAPK1;RBMS3
RNA splicing (GO:0008380)	15/313	0.08176350344063288	0.5395252988054754	-1.2875542767663188	0.7945054553178107	SRPK2;RBM17;RBFOX1;PRPF38A;PLRG1;SUPT6H;SRPK1;SART1;RBM15B;DHX16;PPIH;BCAS2;RBM10;SUGP2;RBM11
regulation of neuron apoptotic process (GO:0043523)	10/188	0.08497783534300944	0.541642161422059	-1.2956020617132626	0.794398034065492	SRPK2;GPI;CDK5;CASP3;STXBP1;NDNF;PARK7;ISL1;NES;CPEB4
response to unfolded protein (GO:0006986)	8/135	0.07384747003331035	0.5163253461418383	-1.1966899777373246	0.7910338507498906	DNAJB1;CUL7;HSPH1;SHC1;VAPB;DCTN1;FAF2;ASNS
chromatin modification (GO:0016568)	21/475	0.08616674640431785	0.5433663564831042	-1.2886141872397596	0.7860179247083682	RNF20;CBX8;BRD3;GTF3C4;LDB1;KDM1A;PRMT1;CTR9;WDR61;CTCF;BRCC3;SUPT6H;TDRD3;RNF2;BABAM1;BRE;WDR82;TBL1XR1;CARM1;WDR5;SKP1
positive regulation of cysteine-type endopeptidase activity involved in apoptotic process (GO:0043280)	7/111	0.07139111287213219	0.5114265113560301	-1.1529926160643378	0.7731407860564141	HIP1;PDCD6;CASP3;TRAF2;UACA;S100A9;S100A8
nucleus organization (GO:0006997)	4/43	0.05558636334678117	0.44784027580239566	-0.9520185561131635	0.7647742492429159	NDC1;SRPK2;SEH1L;MAP7
fibroblast growth factor receptor signaling pathway (GO:0008543)	9/163	0.08368087216297065	0.541642161422059	-1.2232051261675887	0.7500078737150234	TNRC6C;SHC1;PRKAR2B;PRKAR2A;KIT;MAPK1;IRS2;PRKACB;MTOR
activation of signaling protein activity involved in unfolded protein response (GO:0006987)	5/64	0.06065039083578874	0.4624389049248879	-0.9723418524076128	0.7499097355589517	CUL7;VAPB;DCTN1;SHC1;ASNS
regulation of ATP catabolic process (GO:1903289)	4/42	0.05206494101671279	0.43423076906607383	-0.8989105344124577	0.7498524347263475	DNAJB1;AHSA1;ABCA7;PFN2
regulation of ATPase activity (GO:0043462)	4/42	0.05206494101671279	0.43423076906607383	-0.894705336030088	0.7463445458711031	DNAJB1;AHSA1;ABCA7;PFN2
activation of cysteine-type endopeptidase activity (GO:0097202)	6/88	0.06927251182746776	0.5038645105813767	-1.0802098369549185	0.7404275375790523	HIP1;PDCD6;CASP3;TRAF2;S100A9;S100A8
histone modification (GO:0016570)	14/293	0.09196696895725988	0.5554693442928136	-1.255066886903249	0.7379063564171521	RNF20;CBX8;GTF3C4;LDB1;KDM1A;PRMT1;CTR9;WDR61;BRCC3;RNF2;WDR82;CARM1;WDR5;SKP1
regulation of organic acid transport (GO:0032890)	4/43	0.05558636334678117	0.44784027580239566	-0.8968599480401764	0.7204643113667799	DPYSL2;IRS2;MIF;SEPT2
single-organism carbohydrate catabolic process (GO:0044724)	7/113	0.07658133588035856	0.5198026712261092	-1.0918556194440046	0.7144077024126081	PYGB;GPI;AGL;IDNK;PPP2R5D;ENO2;TKT
positive regulation of proteolysis involved in cellular protein catabolic process (GO:1903052)	5/65	0.06374907508377371	0.47963589824934505	-0.95753457610747	0.7035274719197119	DAB2;USP5;CUL3;STUB1;CSNK1D
positive regulation of peptide hormone secretion (GO:0090277)	5/65	0.06374907508377371	0.47963589824934505	-0.9573407507316561	0.7033850629873948	PPP3CB;IRS2;SRI;ISL1;GLUL
regulation of autophagy (GO:0010506)	6/89	0.07212934862975497	0.5140142076276247	-1.0501203603455884	0.698859691576888	LARP1;HERC1;SQSTM1;SOGA1;MTOR;PAFAH1B2
intrinsic apoptotic signaling pathway in response to oxidative stress (GO:0008631)	3/18	0.02538127496297309	0.2946299836518182	-0.5703797788284617	0.6970240545215967	STK24;CASP3;UACA
regulation of peptide hormone secretion (GO:0090276)	10/189	0.08716618539224719	0.5484527240167058	-1.157949818791274	0.6955274155411603	MARCKS;PPP3CB;PRKAR2B;STXBP1;PRKAR2A;IRS2;SRI;ISL1;GLUL;PRKACB
regulation of protein homodimerization activity (GO:0043496)	3/18	0.02538127496297309	0.2946299836518182	-0.5673589030199364	0.6933324385449761	TRAF2;PARK7;ISL1
centrosome organization (GO:0051297)	5/64	0.06065039083578874	0.4624389049248879	-0.8986068288111703	0.6930422748919789	UXT;PPP1R12A;HAUS8;CCP110;CKAP5
regulation of signal transduction by p53 class mediator (GO:1901796)	4/44	0.0592330036132221	0.4552936818270369	-0.8684259949110451	0.6832885268457647	KDM1A;DYRK1A;MIF;EEF1E1
chromosome segregation (GO:0007059)	6/89	0.07212934862975497	0.5140142076276247	-1.0244250947866798	0.6817593799920564	TOP3B;FAM96B;MMS19;CTCF;SRPK1;CIAO1
positive regulation of nuclease activity (GO:0032075)	5/66	0.06693525399469394	0.49087961409281433	-0.9554211740375304	0.6798360189773082	CUL7;VAPB;DCTN1;SHC1;ASNS
positive regulation of protein kinase activity (GO:0045860)	20/456	0.0976791818218902	0.5669379451050117	-1.1953822038738287	0.6783858862482308	CUL7;DBNL;SHC1;MAGED1;DCTN1;ASNS;TRAF2;MIF;PARK7;PIK3R6;STK3;DAB2;CDK5;VAPB;PRKAR2B;PRKAR2A;KIT;DVL2;MAPK1;PRKACB
covalent chromatin modification (GO:0016569)	14/296	0.09752625560153333	0.5669379451050117	-1.1862665517101385	0.6732127041883377	RNF20;CBX8;GTF3C4;LDB1;KDM1A;PRMT1;CTR9;WDR61;BRCC3;RNF2;WDR82;CARM1;WDR5;SKP1
peptidyl-threonine phosphorylation (GO:0018107)	4/44	0.0592330036132221	0.4552936818270369	-0.8529511885999732	0.6711127540459201	CDK5;DYRK1A;MAPK1;MTOR
regulation of peptide secretion (GO:0002791)	10/192	0.0939344075384363	0.5554693442928136	-1.12526094553443	0.6615880101709989	MARCKS;PPP3CB;PRKAR2B;STXBP1;PRKAR2A;IRS2;SRI;ISL1;GLUL;PRKACB
positive regulation of cellular protein catabolic process (GO:1903364)	5/67	0.07020859687806376	0.5080744262626293	-0.9418080859573462	0.6377239981427989	DAB2;USP5;CUL3;STUB1;CSNK1D
regulation of histone H3-K4 methylation (GO:0051569)	3/20	0.03231203035480332	0.3458900419929039	-0.5936920505879161	0.6302838754972685	KDM1A;CTR9;WDR61
Arp2/3 complex-mediated actin nucleation (GO:0034314)	3/17	0.022251019858295865	0.28000840919023645	-0.4942063509251795	0.629092879307864	ARPC1B;WASH1;ARPC5
positive regulation of peptide secretion (GO:0002793)	5/67	0.07020859687806376	0.5080744262626293	-0.9262722646597086	0.6272042688900069	PPP3CB;IRS2;SRI;ISL1;GLUL
positive regulation of protein polymerization (GO:0032273)	5/69	0.07701506285327127	0.5202632749517898	-0.9415961026418402	0.615258005558299	ARPC1B;WASH1;ARPC5;MTOR;PFN2
cellular response to topologically incorrect protein (GO:0035967)	6/92	0.08109946072142188	0.5363880611435438	-0.9806937272958337	0.6108715584129067	CUL7;SHC1;VAPB;DCTN1;ASNS;STUB1
actin filament bundle organization (GO:0061572)	4/45	0.06300394985730672	0.47655115264409653	-0.814638140203153	0.6037936685425607	CUL3;DPYSL3;ZYX;CORO1B
actin filament bundle assembly (GO:0051017)	4/45	0.06300394985730672	0.47655115264409653	-0.8112239974477073	0.6012631734951223	CUL3;DPYSL3;ZYX;CORO1B
embryonic organ development (GO:0048568)	7/119	0.09344064783085966	0.5554693442928136	-1.0136220485615044	0.5959508297471067	TNRC6C;SP3;KIT;MAPK1;NES;PBX1;STK3
regulation of apoptotic signaling pathway (GO:2001233)	16/356	0.11082298521128411	0.6028619277879418	-1.170974796840171	0.5925918008157183	KDM1A;MAGED1;TRAF2;PARK7;MIF;DBH;DYNLL1;STK3;DAB2;CTTN;PRKRA;FIGNL1;ARHGEF2;DNM1L;S100A9;S100A8
regulation of Rac GTPase activity (GO:0032314)	3/18	0.02538127496297309	0.2946299836518182	-0.48461024007268416	0.5922106760024771	VAV3;DYNLT1;MTOR
activation of protein kinase A activity (GO:0034199)	3/17	0.022251019858295865	0.28000840919023645	-0.4596287936598566	0.5850778742016917	PRKAR2B;PRKAR2A;PRKACB
positive regulation of cysteine-type endopeptidase activity (GO:2001056)	7/119	0.09344064783085966	0.5554693442928136	-0.9874511039679253	0.5805638359776408	HIP1;PDCD6;CASP3;TRAF2;UACA;S100A9;S100A8
regulation of TOR signaling (GO:0032006)	4/46	0.06689813282017289	0.49087961409281433	-0.8154391860943994	0.5802309442754056	PKHD1;PDCD6;TELO2;TTI1
posttranscriptional regulation of gene expression (GO:0010608)	19/438	0.11242535550781857	0.6028619277879418	-1.1252006257019807	0.5694269995075912	TIA1;COG7;STXBP1;SAMD4A;YBX2;PARK7;PA2G4;LARP4B;EPRS;MTOR;PUM2;TNRC6C;EPB41L5;METTL14;LARP1;LARS;MAPK1;RBM10;RBMS3
regulation of protein targeting to membrane (GO:0090313)	3/22	0.040125942466207105	0.3915056077717016	-0.6017278108670835	0.5642735279458141	C2CD5;GDI1;CDK5
positive regulation of cell projection organization (GO:0031346)	10/195	0.1010067287064518	0.5826838467366103	-1.0434548451875056	0.5635809459421169	CUL7;MAP1B;KIT;DPYSL3;BRK1;NDNF;FNBP1L;ARHGEF7;CORO1B;MTOR
cellular aldehyde metabolic process (GO:0006081)	4/46	0.06689813282017289	0.49087961409281433	-0.7888294882180873	0.5612966443436036	GPI;PARK7;TKT;ADH5
protein homotrimerization (GO:0070207)	3/17	0.022251019858295865	0.28000840919023645	-0.43748448816100105	0.5568895984329388	BRK1;TRAF2;MIF
regulation of neuron death (GO:1901214)	11/225	0.1119773426847578	0.6028619277879418	-1.0961696964136924	0.5547354017783118	SRPK2;GPI;CDK5;STXBP1;CASP3;NDNF;TRAF2;PARK7;ISL1;NES;CPEB4
regulation of receptor recycling (GO:0001919)	3/18	0.02538127496297309	0.2946299836518182	-0.4537906421047393	0.5545480485186176	NSF;DAB2;SCRIB
regulation of inclusion body assembly (GO:0090083)	3/15	0.016662946724183933	0.22550583549261716	-0.3717721601331933	0.5537208913538484	DNAJB1;PSMC5;SACS
viral genome replication (GO:0019079)	3/18	0.02538127496297309	0.2946299836518182	-0.4513670488404622	0.5515863327175291	CTBP2;CTBP1;HTATSF1
positive regulation of response to extracellular stimulus (GO:0032106)	3/18	0.02538127496297309	0.2946299836518182	-0.45051382147208385	0.5505436590081676	LARP1;SQSTM1;PAFAH1B2
inner ear receptor stereocilium organization (GO:0060122)	3/18	0.02538127496297309	0.2946299836518182	-0.44741449435724684	0.5467561727892318	STRC;GPR98;SCRIB
actin nucleation (GO:0045010)	3/20	0.03231203035480332	0.3458900419929039	-0.5137282941117274	0.5453916046958952	ARPC1B;WASH1;ARPC5
alpha-amino acid biosynthetic process (GO:1901607)	5/69	0.07701506285327127	0.5202632749517898	-0.8316530254733775	0.5434189673615358	ASNSD1;CBS;ASNS;GLUL;GART
carbohydrate catabolic process (GO:0016052)	7/120	0.09643687184034808	0.5654978629153606	-0.9437015502212673	0.5379559009101941	PYGB;GPI;AGL;PPP2R5D;IDNK;TKT;ENO2
positive regulation of protein complex assembly (GO:0031334)	7/122	0.10258698428275137	0.5848705728070318	-0.9975572736788039	0.5350545071243172	ARPC1B;STUB1;SNX9;WASH1;ARPC5;MTOR;PFN2
positive regulation of response to nutrient levels (GO:0032109)	3/18	0.02538127496297309	0.2946299836518182	-0.43214721572478565	0.5280990239054362	LARP1;SQSTM1;PAFAH1B2
positive regulation of MAP kinase activity (GO:0043406)	10/197	0.10588980604391914	0.592816158245878	-0.9969691902567257	0.5212862255086593	DAB2;DBNL;SHC1;MAGED1;KIT;DVL2;MAPK1;TRAF2;MIF;PIK3R6
regulation of proteolysis involved in cellular protein catabolic process (GO:1903050)	8/148	0.10808688374452746	0.59805271861758	-0.9721771237577315	0.499773287452946	DAB2;UBXN1;USP5;CUL3;STUB1;CSNK1D;PARK7;UBQLN4
chaperone-mediated protein folding (GO:0061077)	4/47	0.07091433278341493	0.5096703567287674	-0.7274722721319608	0.49030985262667515	DNAJB1;HSPH1;ST13;FKBP4
localization within membrane (GO:0051668)	3/15	0.016662946724183933	0.22550583549261716	-0.3289972745875798	0.49001158148139784	NDC1;TMED10;MYO18A
viral entry into host cell (GO:0046718)	3/18	0.02538127496297309	0.2946299836518182	-0.39913501167981447	0.487756955048468	DYNLT1;KPNA3;VPS16
peptidyl-threonine modification (GO:0018210)	4/48	0.07505118648872362	0.5166936302097869	-0.731322608421757	0.48289610044586123	CDK5;DYRK1A;MAPK1;MTOR
cellular protein complex assembly (GO:0043623)	12/256	0.12395389214303609	0.6189090695908689	-1.0030711490418531	0.48127044381090583	NDC1;DAB2;TMED10;HIP1;COG4;RAP1GDS1;SRP54;TRAF2;TBCA;FKBP4;DNM1L;PFDN6
negative regulation of translation (GO:0017148)	5/72	0.08786582961311447	0.550419426034576	-0.8042535598383543	0.4801994518317232	TNRC6C;TIA1;SAMD4A;YBX2;EPRS
regulation of transcription factor import into nucleus (GO:0042990)	5/73	0.0916509663381164	0.5554693442928136	-0.8096132585386542	0.4760055228525283	PPM1B;SRI;UACA;MTOR;CHERP
positive regulation of intrinsic apoptotic signaling pathway (GO:2001244)	4/48	0.07505118648872362	0.5166936302097869	-0.7161721646321857	0.4728921840596349	PRKRA;DNM1L;S100A9;S100A8
regulation of nuclease activity (GO:0032069)	5/72	0.08786582961311447	0.550419426034576	-0.7900875485452816	0.4717412849086663	CUL7;VAPB;DCTN1;SHC1;ASNS
glucose metabolic process (GO:0006006)	8/149	0.11103114798451487	0.6028619277879418	-0.9287772115177829	0.4700235750719131	PYGB;GPI;AGL;PPP2R5D;IRS2;TKT;ENO2;PRKACB
mitochondrion localization (GO:0051646)	3/22	0.040125942466207105	0.3915056077717016	-0.4953898365648925	0.46455451408198106	UXT;MAP1B;KIF1B
regulation of response to nutrient levels (GO:0032107)	4/49	0.07930719403128564	0.5282193438524037	-0.7234173949229312	0.4617165640908955	LARP1;SQSTM1;MTOR;PAFAH1B2
regulation of response to extracellular stimulus (GO:0032104)	4/49	0.07930719403128564	0.5282193438524037	-0.7192213258943002	0.45903844964661383	LARP1;SQSTM1;MTOR;PAFAH1B2
positive regulation of Rho GTPase activity (GO:0032321)	8/149	0.11103114798451487	0.6028619277879418	-0.8946902430951684	0.4527732823615887	VAV3;FARP1;DOCK4;DOCK7;RAP1GDS1;SCRIB;ARHGEF2;ARHGEF7
Ras protein signal transduction (GO:0007265)	8/148	0.10808688374452746	0.59805271861758	-0.8741476978587769	0.4493786759656112	CYFIP1;DBNL;GDI1;ABI2;SHC1;BRK1;MAPK1;PARK7
protein refolding (GO:0042026)	3/19	0.028735319118671943	0.3167567735407093	-0.39020947391817296	0.4485930350794075	DNAJB1;ST13;DNAJA2
ubiquitin-dependent protein catabolic process via the multivesicular body sorting pathway (GO:0043162)	3/15	0.016662946724183933	0.22550583549261716	-0.29254069198706195	0.4357128104113916	MVB12A;PTPN23;VPS28
regulation of microtubule cytoskeleton organization (GO:0070507)	6/100	0.10789767826601367	0.59805271861758	-0.8350046113735988	0.429256140127556	PKHD1;RANBP1;ARHGEF2;FKBP4;MAPRE1;CLASP2
regulation of protein polymerization (GO:0032271)	7/127	0.11886693160255263	0.6130637719559149	-0.8755204176188027	0.42838015963405757	ARPC1B;WASH1;ARPC5;FKBP4;MAPRE1;MTOR;PFN2
regulation of viral release from host cell (GO:1902186)	3/22	0.040125942466207105	0.3915056077717016	-0.456622683392396	0.4282004053072207	CHMP2A;TRIM25;TRIM56
response to dsRNA (GO:0043331)	4/49	0.07930719403128564	0.5282193438524037	-0.6604209573190509	0.42150948734023375	PRKRA;DHX36;MAPK1;SLC3A2
regulation of protein catabolic process (GO:0042176)	12/260	0.1337719688175181	0.6503092820715796	-0.9742531584951382	0.4192281591346079	DAB2;SERPINB12;UBXN1;USP5;CUL3;PSMD3;PSMD1;STUB1;CSNK1D;SNX9;PARK7;UBQLN4
negative regulation of intrinsic apoptotic signaling pathway (GO:2001243)	5/75	0.09946864106539714	0.5749772666463201	-0.7504020019872437	0.41529105928466	KDM1A;FIGNL1;MIF;PARK7;ARHGEF2
regulation of canonical Wnt signaling pathway (GO:0060828)	8/152	0.12012338944139073	0.6177774314128667	-0.8604571797623833	0.4144194357044122	DAB2;DVL2;CSNK1D;ISL1;EMD;PFDN5;SCYL2;STK3
entry into cell of other organism involved in symbiotic interaction (GO:0051806)	3/22	0.040125942466207105	0.3915056077717016	-0.4414829868972917	0.41400307256135493	DYNLT1;KPNA3;VPS16
detection of mechanical stimulus involved in sensory perception of sound (GO:0050910)	3/15	0.016662946724183933	0.22550583549261716	-0.27693343710729273	0.4124672207456233	STRC;GPR98;KIT
lysosome localization (GO:0032418)	3/19	0.028735319118671943	0.3167567735407093	-0.35864983393523797	0.41231140781956543	VPS33A;VPS33B;KIT
negative regulation of cytoskeleton organization (GO:0051494)	6/101	0.11153397210743547	0.6028619277879418	-0.8039488669632965	0.4068520587489322	ARHGEF2;FKBP4;MAPRE1;CORO1B;PFN2;CLASP2
cyclic nucleotide catabolic process (GO:0009214)	3/18	0.02538127496297309	0.2946299836518182	-0.3282798337789254	0.4011694475358993	DPYSL3;PDE4C;PDE4B
rRNA metabolic process (GO:0016072)	7/126	0.11550902189403768	0.6071947273929548	-0.7976831684555669	0.39796870858426037	UTP15;LAS1L;DIS3L;HEATR1;GAR1;IMP4;PA2G4
leukocyte chemotaxis (GO:0030595)	6/100	0.10789767826601367	0.59805271861758	-0.7720699336455895	0.3969029094103548	VAV3;KIT;DPYSL3;PDE4B;S100A9;S100A8
tRNA aminoacylation for protein translation (GO:0006418)	4/49	0.07930719403128564	0.5282193438524037	-0.6154216189572794	0.39278894503564316	QARS;LARS;EPRS;EEF1E1
cAMP catabolic process (GO:0006198)	3/16	0.019345004128848847	0.25188097619516464	-0.2835337652888704	0.39093596422805976	DPYSL3;PDE4C;PDE4B
release of cytochrome c from mitochondria (GO:0001836)	3/25	0.053456133972710436	0.4381246254132233	-0.4726387186091298	0.39004598928305223	GGCT;CASP3;DNM1L
positive regulation of endopeptidase activity (GO:0010950)	7/128	0.12227496628782299	0.6189090695908689	-0.7965745347525544	0.382194005116213	HIP1;PDCD6;CASP3;TRAF2;UACA;S100A9;S100A8
movement in environment of other organism involved in symbiotic interaction (GO:0052192)	3/22	0.040125942466207105	0.3915056077717016	-0.40277329059633815	0.37770284428044043	DYNLT1;KPNA3;VPS16
negative regulation of DNA damage response, signal transduction by p53 class mediator (GO:0043518)	3/13	0.011965542143812426	0.17723959300522155	-0.21784866601888941	0.37693327066116433	KDM1A;DYRK1A;MIF
entry into other organism involved in symbiotic interaction (GO:0051828)	3/22	0.040125942466207105	0.3915056077717016	-0.3961462814099735	0.3714883303660332	DYNLT1;KPNA3;VPS16
regulation of cellular protein catabolic process (GO:1903362)	8/155	0.1295987536123123	0.6421234412428853	-0.8348611111038209	0.3698223650062428	DAB2;UBXN1;USP5;CUL3;STUB1;CSNK1D;PARK7;UBQLN4
entry into host (GO:0044409)	3/22	0.040125942466207105	0.3915056077717016	-0.3872948738208641	0.3631878747490725	DYNLT1;KPNA3;VPS16
negative regulation of viral process (GO:0048525)	5/75	0.09946864106539714	0.5749772666463201	-0.6468474377637378	0.35798139785484917	SRPK2;TRIM25;ZC3HAV1;TRIM56;SRPK1
entry into host cell (GO:0030260)	3/22	0.040125942466207105	0.3915056077717016	-0.3795669573575072	0.3559409790469023	DYNLT1;KPNA3;VPS16
positive regulation of intracellular protein transport (GO:0090316)	7/131	0.13279510592945448	0.6503092820715796	-0.821447181015883	0.3534746451892773	DAB2;C2CD5;CDK5;EMD;UACA;KPNA1;CHERP
cell chemotaxis (GO:0060326)	8/155	0.1295987536123123	0.6421234412428853	-0.7915287287980527	0.3506272151872677	VAV3;DOCK4;KIT;DPYSL3;PDE4B;S100A9;S100A8;CORO1B
positive regulation of mitotic cell cycle (GO:0045931)	6/103	0.1189912806327936	0.6130637719559149	-0.7113190286501668	0.34803866695953245	DYNC1LI1;RANBP1;CUL3;ASNS;PLRG1;PBX1
cellular response to fibroblast growth factor stimulus (GO:0044344)	9/183	0.137651343153461	0.6607501377878233	-0.8354319719570735	0.34618589699693986	TNRC6C;SHC1;PRKAR2B;PRKAR2A;KIT;MAPK1;IRS2;PRKACB;MTOR
regulation of microtubule polymerization or depolymerization (GO:0031110)	4/52	0.09277323589870033	0.5554693442928136	-0.5840934448574902	0.34341298475764725	ARHGEF2;FKBP4;MAPRE1;CLASP2
movement in host environment (GO:0052126)	3/22	0.040125942466207105	0.3915056077717016	-0.36422618792103933	0.34155508905646753	DYNLT1;KPNA3;VPS16
regulation of DNA binding (GO:0051101)	5/77	0.1076098691136057	0.59805271861758	-0.6622875879019436	0.34046639954420554	KDM1A;EDF1;PARK7;SRI;ISL1
nucleotide-excision repair, DNA gap filling (GO:0006297)	3/22	0.040125942466207105	0.3915056077717016	-0.3371095032919612	0.316126270535025	RFC3;RFC4;RPA1
tRNA aminoacylation (GO:0043039)	4/52	0.09277323589870033	0.5554693442928136	-0.5251882554015873	0.3087801582692387	QARS;LARS;EPRS;EEF1E1
amino acid activation (GO:0043038)	4/52	0.09277323589870033	0.5554693442928136	-0.5219091756034684	0.3068522500027707	QARS;LARS;EPRS;EEF1E1
cell division (GO:0051301)	7/131	0.13279510592945448	0.6503092820715796	-0.7074259944115255	0.30441050642238515	CDK6;PDCD6IP;CDK5;CUL3;PARD3;KIT;MCM5
negative regulation of neuron apoptotic process (GO:0043524)	7/133	0.14005011544626503	0.6649457901989612	-0.7459940791258213	0.30440270505829814	GPI;STXBP1;NDNF;PARK7;ISL1;NES;CPEB4
regulation of DNA recombination (GO:0000018)	4/52	0.09277323589870033	0.5554693442928136	-0.5159372025209309	0.3033410770573751	RAD50;FIGNL1;SUPT6H;KPNA1
regulation of actin cytoskeleton organization (GO:0032956)	11/240	0.1512233923067979	0.6882528001482161	-0.8078524747038052	0.30181293038933193	CYFIP1;CDK5;ABI2;ARPC1B;BRK1;WASH1;ARPC5;SYNPO;CORO1B;MTOR;PFN2
telomere maintenance via semi-conservative replication (GO:0032201)	3/22	0.040125942466207105	0.3915056077717016	-0.3196752343881367	0.29977719003076675	RFC3;RFC4;RPA1
regulation of protein export from nucleus (GO:0046825)	3/25	0.053456133972710436	0.4381246254132233	-0.36220449713449926	0.2989099408176739	CDK5;PARK7;EMD
regulation of carbohydrate biosynthetic process (GO:0043255)	5/79	0.11606624470800184	0.6071947273929548	-0.5963187238316686	0.2975068320513554	EPM2AIP1;WDR5;IRS2;SOGA1;MTOR
regulation of cysteine-type endopeptidase activity involved in apoptotic process (GO:0043281)	9/186	0.14701712119555102	0.6765642276377785	-0.7528219482930498	0.2941485350173688	GPI;HIP1;CASP3;PDCD6;TRAF2;PARK7;UACA;S100A9;S100A8
response to fibroblast growth factor (GO:0071774)	9/187	0.1502087214179932	0.687202763893917	-0.764865819126397	0.2869209683430498	TNRC6C;SHC1;PRKAR2B;PRKAR2A;KIT;MAPK1;IRS2;PRKACB;MTOR
DNA replication (GO:0006260)	9/186	0.14701712119555102	0.6765642276377785	-0.7293592783763335	0.28498101539437337	RFC3;RAD50;RRM1;RFC4;RPA1;E4F1;NAP1L1;MCM5;SSBP1
regulation of intracellular steroid hormone receptor signaling pathway (GO:0033143)	4/53	0.09748836792527756	0.5669379451050117	-0.5001297954630355	0.28382637238102004	DAB2;CARM1;PARK7;ISL1
negative regulation of signal transduction by p53 class mediator (GO:1901797)	3/25	0.053456133972710436	0.4381246254132233	-0.3400425454055811	0.28062074857378194	KDM1A;DYRK1A;MIF
cellular amino acid biosynthetic process (GO:0008652)	6/106	0.13062856929747418	0.6455024975818052	-0.61783908219969	0.27044435334300637	GGCT;ASNSD1;CBS;ASNS;GLUL;GART
negative regulation of multi-organism process (GO:0043901)	7/133	0.14005011544626503	0.6649457901989612	-0.6536741296711879	0.26673157182656115	SRPK2;PPM1B;NPR2;TRIM25;ZC3HAV1;TRIM56;SRPK1
positive regulation of histone modification (GO:0031058)	4/55	0.10724599052045998	0.59805271861758	-0.5164791111378768	0.26550970699293763	RNF20;CTBP1;CTR9;WDR61
positive regulation of phospholipase activity (GO:0010518)	5/80	0.12040974334957583	0.6181323286754399	-0.5438482338287776	0.26161967235471295	ARF4;PRKAR2B;PRKAR2A;KIT;PRKACB
positive regulation of intracellular transport (GO:0032388)	10/217	0.16188161392461042	0.7191873027685746	-0.7883316400498995	0.2598604787587386	C2CD5;DAB2;CDK5;SRI;PTPN23;DYNLL1;EMD;UACA;CHERP;KPNA1
regulation of B cell proliferation (GO:0030888)	4/54	0.10231334493194683	0.5848705728070318	-0.4816357576639266	0.2583324183281878	VAV3;CASP3;IRS2;MIF
positive regulation of histone methylation (GO:0031062)	3/25	0.053456133972710436	0.4381246254132233	-0.3114577036035546	0.2570310542466198	RNF20;CTR9;WDR61
detection of mechanical stimulus involved in sensory perception (GO:0050974)	3/25	0.053456133972710436	0.4381246254132233	-0.3052249856203499	0.2518874920373379	STRC;GPR98;KIT
hippo signaling (GO:0035329)	3/26	0.05831437030741415	0.4537506027874911	-0.31185339166326703	0.246428909246593	CASP3;DVL2;STK3
cell differentiation in hindbrain (GO:0021533)	3/26	0.05831437030741415	0.4537506027874911	-0.3078191839846998	0.24324104782042322	SKOR2;HERC1;LDB1
anterograde axon cargo transport (GO:0008089)	3/25	0.053456133972710436	0.4381246254132233	-0.29322739136383535	0.24198645486761566	AP3D1;KIF1B;AP3B2
positive regulation of macroautophagy (GO:0016239)	3/13	0.011965542143812426	0.17723959300522155	-0.13809387875186035	0.23893732437044898	LARP1;SQSTM1;PAFAH1B2
protein dephosphorylation (GO:0006470)	8/161	0.14966172053786936	0.6865127954995168	-0.6275236973735596	0.23603074884173783	PPM1B;PPP3CB;PPP1R12A;PPP2R2A;PTPN23;SBF1;PPM1G;ILKAP
NLS-bearing protein import into nucleus (GO:0006607)	3/14	0.01420377190557824	0.19899274531755917	-0.14388245511592182	0.23229634045149336	KPNA4;KPNA3;KPNA1
positive regulation of chromatin modification (GO:1903310)	4/56	0.11228403878573011	0.6028619277879418	-0.45339799820411514	0.2294498028198733	RNF20;CTBP1;CTR9;WDR61
positive regulation of secretion by cell (GO:1903532)	11/247	0.17168421605881842	0.7327391307223446	-0.6847429589730664	0.21293145923437656	PPP3CB;CDK5;DPYSL2;STXBP1;MYO18A;IRS2;MIF;SRI;DNM1L;ISL1;GLUL
positive regulation of protein localization to nucleus (GO:1900182)	5/84	0.13852304966643506	0.6620305092037827	-0.48459564515591746	0.19986839070000195	DAB2;PARK7;UACA;KPNA1;CHERP
response to transforming growth factor beta (GO:0071559)	8/166	0.16746083012368465	0.7191873027685746	-0.6037864823198752	0.19902822161719402	EPB41L5;DAB2;PARD3;ZYX;SMAD9;STUB1;NEDD8;FERMT2
endoplasmic reticulum unfolded protein response (GO:0030968)	5/83	0.1338864886710687	0.6503092820715796	-0.4624647629270939	0.19900192217597615	CUL7;VAPB;DCTN1;SHC1;ASNS
positive regulation of peptidyl-tyrosine phosphorylation (GO:0050731)	7/139	0.1629241101699679	0.7191873027685746	-0.6017240038833518	0.19834835973329118	VTN;KIT;DVL2;MIF;ARHGEF2;ISL1;MTOR
cellular response to transforming growth factor beta stimulus (GO:0071560)	8/166	0.16746083012368465	0.7191873027685746	-0.601209914223689	0.19817889858483792	EPB41L5;DAB2;PARD3;ZYX;SMAD9;STUB1;NEDD8;FERMT2
ribonucleotide biosynthetic process (GO:0009260)	7/140	0.16689150044849108	0.7191873027685746	-0.5973468440071127	0.1969055014192813	NME7;NPR2;CTPS2;ATP5H;HPRT1;GART;ATP5L
protein localization to membrane (GO:0072657)	12/276	0.17709562068217066	0.7327391307223446	-0.6224339955355188	0.19355551920567407	OSBPL8;CDK5;SRP72;SSR4;NME7;PARD3;AP3D1;MAP7;SRP54;SRP68;GPHN;FERMT2
positive regulation of peptidase activity (GO:0010952)	7/139	0.1629241101699679	0.7191873027685746	-0.5863380799365097	0.1932766445314012	HIP1;PDCD6;CASP3;TRAF2;UACA;S100A9;S100A8
positive regulation of apoptotic signaling pathway (GO:2001235)	8/168	0.17484108823250988	0.7327391307223446	-0.6179094815383676	0.19214855129879024	MAGED1;PRKRA;TRAF2;DYNLL1;DNM1L;S100A9;S100A8;STK3
regulation of dendrite morphogenesis (GO:0048814)	4/56	0.11228403878573011	0.6028619277879418	-0.3765089531495929	0.1905387880014396	CUL7;SKOR2;CDK5;PDLIM5
integrin-mediated signaling pathway (GO:0007229)	5/84	0.13852304966643506	0.6620305092037827	-0.4547387793590406	0.18755411636052105	VAV3;DAB2;CUL3;ZYX;FERMT2
telomere maintenance via recombination (GO:0000722)	3/26	0.05831437030741415	0.4537506027874911	-0.2370595002182849	0.18732621041496747	RFC3;RFC4;RPA1
protein maturation (GO:0051604)	10/222	0.17779782674490086	0.7327391307223446	-0.5992317258192	0.18634041303553575	HIP1;CASP3;PDCD6;STUB1;TRAF2;VPS37B;S100A9;PRSS12;S100A8;VPS28
single-organism behavior (GO:0044708)	15/362	0.1854682163551828	0.7502915190947231	-0.6352111085200384	0.1824919945589343	TMOD1;GIT2;GPI;ABCA7;ABAT;DBH;PARK7;ARCN1;PPP3CB;CDK5;ABI2;PRKAR2B;TBCE;KIT;HPRT1
regulation of anion transport (GO:0044070)	5/85	0.1432294409165312	0.6718805183538371	-0.44615551030738526	0.17742478295713696	DPYSL2;ABCA7;IRS2;MIF;SEPT2
monosaccharide biosynthetic process (GO:0046364)	4/56	0.11228403878573011	0.6028619277879418	-0.3480975189640677	0.17616069635233672	GPI;TKT;ENO2;PRKACB
adult behavior (GO:0030534)	7/141	0.17090137800974295	0.730892509864224	-0.5616578879098426	0.17607349962577126	TMOD1;CDK5;TBCE;ABAT;PARK7;DBH;ARCN1
regulation of DNA repair (GO:0006282)	4/57	0.11742514067022683	0.6071947273929548	-0.34161779565134986	0.17043507791194223	BABAM1;BRE;FIGNL1;BRCC3
regulation of glycogen biosynthetic process (GO:0005979)	3/29	0.07407199058574895	0.5163253461418383	-0.2520311690324467	0.1665971887937829	EPM2AIP1;IRS2;MTOR
regulation of protein kinase B signaling (GO:0051896)	6/114	0.16415481899742726	0.7191873027685746	-0.49635875892324405	0.16361645045950854	PKHD1;OSBPL8;PDCD6;PARK7;MTOR;STK3
regulation of glucan biosynthetic process (GO:0010962)	3/29	0.07407199058574895	0.5163253461418383	-0.24588747981282116	0.1625360984265017	EPM2AIP1;IRS2;MTOR
regulation of cysteine-type endopeptidase activity (GO:2000116)	9/197	0.1839508032357913	0.7502915190947231	-0.5586316991125148	0.16049123138354765	GPI;HIP1;CASP3;PDCD6;TRAF2;PARK7;UACA;S100A9;S100A8
energy derivation by oxidation of organic compounds (GO:0015980)	9/198	0.18749903037579388	0.7502915190947231	-0.5326956288602531	0.15303996812969264	PYGB;MARCKS;PRKAR2B;AGL;STXBP1;PRKAR2A;PPP2R5D;TKT;PRKACB
neuron projection guidance (GO:0097485)	15/367	0.19866954090806607	0.7732397021436282	-0.5754099664052444	0.14797598594869932	MYO10;CSNK2A2;CRMP1;ISL1;ENAH;CDK5;DPYSL4;KIF5C;DPYSL5;DPYSL2;KIF5A;DPYSL3;DCX;MAPK1;CLASP2
axon guidance (GO:0007411)	15/367	0.19866954090806607	0.7732397021436282	-0.5728923177260162	0.14732853184235375	MYO10;CSNK2A2;CRMP1;ISL1;ENAH;DPYSL4;CDK5;KIF5C;DPYSL5;DPYSL2;KIF5A;DPYSL3;DCX;MAPK1;CLASP2
cellular response to unfolded protein (GO:0034620)	5/86	0.14800420720543833	0.6800064059648896	-0.37307408731158176	0.1438771634977111	CUL7;VAPB;DCTN1;SHC1;ASNS
ribonucleoside triphosphate biosynthetic process (GO:0009201)	4/58	0.12266687022139927	0.6189090695908689	-0.2962865778096384	0.1421573862770022	NME7;CTPS2;ATP5H;ATP5L
ribose phosphate biosynthetic process (GO:0046390)	7/144	0.1831786696493855	0.748645129981209	-0.4858163010943982	0.14063905791789105	NME7;NPR2;CTPS2;HPRT1;ATP5H;GART;ATP5L
positive regulation of response to DNA damage stimulus (GO:2001022)	4/57	0.11742514067022683	0.6071947273929548	-0.27507713467551265	0.1372375604462442	BABAM1;BRE;BRCC3;EEF1E1
central nervous system neuron differentiation (GO:0021953)	5/87	0.1528458568198275	0.689989867929507	-0.3608156459553765	0.13389088020523815	SKOR2;LDB1;HERC1;HPRT1;ISL1
response to amphetamine (GO:0001975)	3/29	0.07407199058574895	0.5163253461418383	-0.20153328618071026	0.13321716934843408	DPYSL2;HPRT1;DBH
protein complex localization (GO:0031503)	3/13	0.011965542143812426	0.17723959300522155	-0.07684519125101241	0.13296160955291428	NDC1;FKBP4;MZT1
histone lysine methylation (GO:0034968)	4/58	0.12266687022139927	0.6189090695908689	-0.27126916734072754	0.13015410988840978	WDR82;CTR9;WDR5;WDR61
positive regulation of protein serine/threonine kinase activity (GO:0071902)	11/257	0.20308077510899866	0.7794355255195575	-0.47962845297706086	0.11951636306907469	DAB2;DBNL;SHC1;MAGED1;KIT;DVL2;MAPK1;TRAF2;MIF;PIK3R6;STK3
positive regulation of protein transport (GO:0051222)	10/231	0.20817440794843184	0.7919746414988059	-0.5097640892144016	0.11889019154814336	C2CD5;DAB2;CDK5;MYO18A;MIF;DNM1L;EMD;UACA;CHERP;KPNA1
regulation of phospholipase activity (GO:0010517)	5/89	0.16272367004992175	0.7191873027685746	-0.3604247169179325	0.11880804313378605	ARF4;PRKAR2B;PRKAR2A;KIT;PRKACB
positive regulation of DNA repair (GO:0045739)	3/29	0.07407199058574895	0.5163253461418383	-0.1789263383598964	0.11827356547350838	BABAM1;BRE;BRCC3
protein processing (GO:0016485)	9/201	0.1983215930753801	0.7732397021436282	-0.4455683799663595	0.11458512049242425	HIP1;CASP3;PDCD6;TRAF2;VPS37B;S100A9;PRSS12;S100A8;VPS28
cyclic nucleotide metabolic process (GO:0009187)	4/58	0.12266687022139927	0.6189090695908689	-0.2362529103181287	0.11335341776007929	NPR2;PDE4C;DPYSL3;PDE4B
regulation of hormone secretion (GO:0046883)	10/230	0.20469572215449208	0.7824659056550746	-0.4532588083946831	0.11118661961467055	MARCKS;PPP3CB;PRKAR2B;STXBP1;PRKAR2A;IRS2;SRI;ISL1;GLUL;PRKACB
membrane fusion (GO:0061025)	5/89	0.16272367004992175	0.7191873027685746	-0.3317141753765811	0.10934408825575277	NSF;VAV3;VPS33B;ANXA7;DNM1L
positive regulation of lipase activity (GO:0060193)	5/90	0.1677566879079774	0.7191873027685746	-0.32636311717126687	0.10758020047495685	ARF4;PRKAR2B;PRKAR2A;KIT;PRKACB
generation of precursor metabolites and energy (GO:0006091)	15/375	0.2206723182099004	0.7919746414988059	-0.45929980070236553	0.1071206121397882	GPI;PYGB;AGL;COX4I1;STXBP1;PPP2R5D;ATP5H;ENO2;ATP5L;MARCKS;VGF;PRKAR2B;PRKAR2A;TKT;PRKACB
negative regulation of protein complex assembly (GO:0031333)	5/91	0.1728503019707239	0.7327391307223446	-0.34208203492696304	0.10637572233543521	SAR1A;PARK7;MAPRE1;FKBP4;PFN2
insulin receptor signaling pathway (GO:0008286)	7/148	0.20009789797666344	0.7732397021436282	-0.4116353938629453	0.1058587039059936	C2CD5;SHC1;MAPK1;ATP6V1H;IRS2;SOGA1;MTOR
positive regulation of endocytosis (GO:0045807)	5/90	0.1677566879079774	0.7191873027685746	-0.31539778681315234	0.10396566079159844	VTN;DAB2;HIP1;ABCA7;SCYL2
cellular response to oxidative stress (GO:0034599)	7/148	0.20009789797666344	0.7732397021436282	-0.40407240982470305	0.10391376015264715	STK24;PRKRA;CASP3;TRAF2;PARK7;UACA;RBM11
chemotaxis (GO:0006935)	11/263	0.2230369197983586	0.7919746414988059	-0.4217859563789929	0.09837141181030568	VAV3;DOCK4;KIT;DPYSL3;PDE4B;MAPK1;SCRIB;MIF;S100A9;S100A8;CORO1B
regulation of cell-substrate adhesion (GO:0010810)	7/149	0.204420563075088	0.7824659056550746	-0.39999328127534484	0.0981203232896894	EPB41L5;VTN;DAB2;CDK6;EMILIN1;NDNF;ARHGEF7
regulation of Ras GTPase activity (GO:0032318)	14/349	0.22770130637363897	0.7919746414988059	-0.4194150640611181	0.09781845830146484	VAV3;GIT2;FARP1;DOCK4;DYNLT1;RAP1GDS1;DOCK7;SCRIB;MTOR;TBC1D5;ARHGEF2;SBF1;ARHGEF7;GIT1
taxis (GO:0042330)	11/263	0.2230369197983586	0.7919746414988059	-0.4192386791234358	0.09777732076457091	VAV3;DOCK4;KIT;DPYSL3;PDE4B;MAPK1;SCRIB;MIF;S100A9;S100A8;CORO1B
methylation (GO:0032259)	11/269	0.24374538796223386	0.7919746414988059	-0.4134748954903124	0.09643305710480597	TRMT112;METTL14;PRMT1;RNMT;WDR82;CARM1;CTR9;WDR5;WDR61;CTCF;GART
negative regulation of canonical Wnt signaling pathway (GO:0090090)	5/91	0.1728503019707239	0.7327391307223446	-0.308740353721382	0.09600760866679796	DAB2;ISL1;PFDN5;SCYL2;STK3
hematopoietic or lymphoid organ development (GO:0048534)	8/175	0.20176588608686705	0.7754353784203377	-0.3762890923424288	0.09570184145114177	TNRC6C;SGPL1;RBM15;SP3;KIT;RPA1;PBX1;STK3
cerebellar Purkinje cell differentiation (GO:0021702)	3/13	0.011965542143812426	0.17723959300522155	-0.05426104854416865	0.0938853327450913	SKOR2;HERC1;LDB1
regulation of cell morphogenesis (GO:0022604)	16/408	0.233030161875878	0.7919746414988059	-0.39255739287574576	0.09155455360647763	CYFIP1;CUL7;SKOR2;GDI1;MYO10;CORO1B;EPB41L5;DAB2;CDK5;TBC1D5;MAP1B;KIT;ANXA7;PDLIM5;ARHGEF7;FERMT2
negative regulation of organelle organization (GO:0010639)	10/237	0.22954906188016425	0.7919746414988059	-0.3876952090229175	0.0904205663723123	KDM1A;SAR1A;CTBP1;ARHGEF2;FKBP4;MAPRE1;SUPT6H;CORO1B;PFN2;CLASP2
positive regulation of hormone secretion (GO:0046887)	5/91	0.1728503019707239	0.7327391307223446	-0.28654686923254136	0.08910619993264811	PPP3CB;IRS2;SRI;ISL1;GLUL
post-Golgi vesicle-mediated transport (GO:0006892)	5/90	0.1677566879079774	0.7191873027685746	-0.2656344146357567	0.08756198870525572	VPS51;AP3B2;SCAMP3;TXNDC5;DNM2
establishment of protein localization to organelle (GO:0072594)	12/292	0.2263107995521024	0.7919746414988059	-0.3730521743672968	0.08700543134831372	IPO9;SRP72;SSR4;TOMM70A;SRP54;MAPK1;KPNA4;SRP68;KPNA3;IPO7;TNPO3;KPNA1
actin filament-based movement (GO:0030048)	4/61	0.13897053937927506	0.6620305092037827	-0.20458998470783707	0.08438183752917713	TMOD1;EPB41L5;PARD3;FNBP1L
positive regulation of JUN kinase activity (GO:0043507)	4/61	0.13897053937927506	0.6620305092037827	-0.19943658829660313	0.08225635196683558	DAB2;DBNL;DVL2;TRAF2
vesicle docking involved in exocytosis (GO:0006904)	3/29	0.07407199058574895	0.5163253461418383	-0.12379944742980742	0.08183368745702399	VPS33A;STXBP1;VPS33B
regulation of B cell activation (GO:0050864)	5/92	0.17800287143274524	0.7327391307223446	-0.26284113864821174	0.0817345347853226	VAV3;CASP3;IRS2;MIF;SUPT6H
rRNA processing (GO:0006364)	6/120	0.19145613728581826	0.7541568621064642	-0.28811881209149987	0.08129413250548323	UTP15;LAS1L;HEATR1;GAR1;IMP4;PA2G4
regulation of lipase activity (GO:0060191)	6/122	0.20092269334885415	0.7732397021436282	-0.30326737918397356	0.07799011498042333	ARF4;PRKAR2B;PRKAR2A;TIPRL;KIT;PRKACB
central nervous system neuron development (GO:0021954)	3/30	0.07970222521700651	0.5296101133578657	-0.12030027628574301	0.07646456126328827	CDK5;MAP2;HPRT1
ER to Golgi vesicle-mediated transport (GO:0006888)	4/60	0.13344216060297753	0.6503092820715796	-0.17352910003841857	0.07467082301047985	LMAN1;TRAPPC3;TMED10;CUL3
interaction with host (GO:0051701)	5/92	0.17800287143274524	0.7327391307223446	-0.23829853096304163	0.07410262970424289	DYNLT1;VAPB;ATP6V1H;KPNA3;VPS16
nucleic acid transport (GO:0050657)	7/153	0.2220578798045628	0.7919746414988059	-0.3048764811564949	0.0711050935327352	NDC1;NXF1;RBFOX1;SEH1L;KIF5C;SUPT6H;CKAP5
establishment of RNA localization (GO:0051236)	7/153	0.2220578798045628	0.7919746414988059	-0.30231858459513733	0.07050852578978413	NDC1;NXF1;RBFOX1;SEH1L;KIF5C;SUPT6H;CKAP5
RNA transport (GO:0050658)	7/153	0.2220578798045628	0.7919746414988059	-0.2997668513750013	0.06991339549767339	NDC1;NXF1;RBFOX1;SEH1L;KIF5C;SUPT6H;CKAP5
locomotory behavior (GO:0007626)	8/183	0.2344178025805443	0.7919746414988059	-0.2939604123307751	0.06855918349100862	TMOD1;TBCE;STRN;ABAT;DBH;HPRT1;PARK7;ARCN1
positive regulation of nucleocytoplasmic transport (GO:0046824)	5/94	0.1884781990594353	0.7502915190947231	-0.2378905028376756	0.06834438467334476	DAB2;EMD;UACA;KPNA1;CHERP
regulation of microtubule-based process (GO:0032886)	6/124	0.21055726416648993	0.7919746414988059	-0.2925106135310778	0.06822105285244616	PKHD1;RANBP1;ARHGEF2;FKBP4;MAPRE1;CLASP2
negative regulation of histone modification (GO:0031057)	3/31	0.08551242281241367	0.541642161422059	-0.10730095651145143	0.06579155083569847	KDM1A;CTBP1;SUPT6H
regulation of dephosphorylation (GO:0035303)	6/126	0.22035049408615387	0.7919746414988059	-0.28066680455136406	0.06545876977278114	FARP1;PPP1R12A;FKBP15;TIPRL;PPP6R3;SYMPK
positive regulation of glucose metabolic process (GO:0010907)	3/32	0.0914969668970061	0.5554693442928136	-0.11027803523690996	0.06483707284740402	EPM2AIP1;WDR5;IRS2
negative regulation of nervous system development (GO:0051961)	9/211	0.2361788603838497	0.7919746414988059	-0.2695567207404354	0.06286761041035363	GDI1;DYNLT1;CDK5;DPYSL3;ARHGEF2;FKBP4;ISL1;PRKACB;PBX1
ER-nucleus signaling pathway (GO:0006984)	5/94	0.1884781990594353	0.7502915190947231	-0.2007446891749085	0.05767263549593087	CUL7;SHC1;VAPB;DCTN1;ASNS
purine ribonucleotide biosynthetic process (GO:0009152)	6/126	0.22035049408615387	0.7919746414988059	-0.24684240792894555	0.057570044225955984	NME7;NPR2;ATP5H;HPRT1;GART;ATP5L
regulation of glucose metabolic process (GO:0010906)	5/94	0.1884781990594353	0.7502915190947231	-0.19324631190103447	0.055518400775677254	EPM2AIP1;WDR5;IRS2;SOGA1;MTOR
regulation of myeloid cell differentiation (GO:0045637)	7/156	0.23562589325938074	0.7919746414988059	-0.23578079050459033	0.054990188480447115	RBM15;CDK6;LDB1;KDM1A;PRMT1;CTR9;WDR61
myeloid cell differentiation (GO:0030099)	7/154	0.22654961577470878	0.7919746414988059	-0.22990833561637553	0.05362057986875842	DAB2;SNRK;KDM1A;VPS33A;CASP3;KIT;SP3
regulation of receptor-mediated endocytosis (GO:0048259)	4/64	0.1560863973171916	0.6989676816036698	-0.1424302056659459	0.05101148825853233	VTN;DAB2;HIP1;SCYL2
purine nucleoside monophosphate biosynthetic process (GO:0009127)	4/64	0.1560863973171916	0.6989676816036698	-0.14147491145935703	0.05066934889999524	ATP5H;HPRT1;GART;ATP5L
purine ribonucleoside monophosphate biosynthetic process (GO:0009168)	4/64	0.1560863973171916	0.6989676816036698	-0.13804430896539735	0.04944067596491039	ATP5H;HPRT1;GART;ATP5L
protein modification by small protein removal (GO:0070646)	5/93	0.1832127322316883	0.748645129981209	-0.16434497796287303	0.04757626045517133	OTUD4;BABAM1;COPS6;USP5;BRCC3
homeostasis of number of cells (GO:0048872)	5/96	0.19916911609349863	0.7732397021436282	-0.17314723068142338	0.04452761278091234	PPP3CB;CASP3;PDE4B;RPA1;MAP7
negative regulation of cellular component organization (GO:0051129)	18/474	0.2552605477237487	0.7919746414988059	-0.1832086402558965	0.04272900110885852	LRSAM1;GDI1;SAR1A;KDM1A;CTBP1;PARK7;SUPT6H;CORO1B;DNAJB1;DAB2;CDK5;DPYSL3;SACS;ARHGEF2;FKBP4;MAPRE1;PFN2;CLASP2
organic acid biosynthetic process (GO:0016053)	11/272	0.25435767731407505	0.7919746414988059	-0.17015489560646682	0.039684529686434517	GGCT;CBS;ASNSD1;RNPEP;TECR;ASNS;PARK7;MIF;GART;GLUL;AASDHPPT
carboxylic acid biosynthetic process (GO:0046394)	11/272	0.25435767731407505	0.7919746414988059	-0.1676545886046174	0.039101393320675304	GGCT;CBS;ASNSD1;RNPEP;TECR;ASNS;PARK7;MIF;GART;GLUL;AASDHPPT
positive regulation of protein catabolic process (GO:0045732)	6/130	0.2403746786478363	0.7919746414988059	-0.15948924229190972	0.03719702302917279	DAB2;USP5;CUL3;STUB1;CSNK1D;SNX9
telomere maintenance (GO:0000723)	4/62	0.14458919321953562	0.6718805183538371	-0.09330761765005603	0.03710608392666236	RFC3;RAD50;RFC4;RPA1
cellular response to peptide (GO:1901653)	11/273	0.25793085463306376	0.7919746414988059	-0.1514709810399941	0.03532695678423109	C2CD5;SHC1;PRKAR2B;PRKAR2A;MAPK1;ATP6V1H;IRS2;ARHGEF2;SOGA1;PRKACB;MTOR
carbohydrate biosynthetic process (GO:0016051)	6/130	0.2403746786478363	0.7919746414988059	-0.14141574468786589	0.032981815176063446	GPI;AGL;COG2;TKT;ENO2;PRKACB
response to ionizing radiation (GO:0010212)	6/127	0.22530363449900703	0.7919746414988059	-0.1396305569572546	0.032565463150229575	BABAM1;RRM1;BRE;FIGNL1;INTS3;BRCC3
peptidyl-serine modification (GO:0018209)	5/97	0.20459110813127343	0.7824659056550746	-0.1290083546331983	0.03164638521757231	CDK5;DYRK1A;MAPK1;NDNF;MTOR
negative regulation of transport (GO:0051051)	14/361	0.2644312266495375	0.7919746414988059	-0.1143999196643952	0.02668102490889997	LRSAM1;GDI1;SAR1A;FAM89B;IRS2;PARK7;SRI;UACA;MTOR;PPM1B;CDK5;MAP1B;PKIA;EMD
glutamine family amino acid metabolic process (GO:0009064)	4/65	0.16195938233416488	0.7191873027685746	-0.08010947317915255	0.026406762073037215	ASNSD1;CTPS2;ASNS;GLUL
positive regulation of secretion (GO:0051047)	11/273	0.25793085463306376	0.7919746414988059	-0.11142647040348026	0.025987539511108094	PPP3CB;CDK5;DPYSL2;STXBP1;MYO18A;IRS2;SRI;MIF;DNM1L;ISL1;GLUL
cellular response to nutrient levels (GO:0031669)	5/99	0.21557941199671046	0.7919746414988059	-0.10296457572748302	0.024014006458907555	ASNS;GLUL;SQSTM1;MTOR;CPEB4
response to ammonium ion (GO:0060359)	4/66	0.16791152216537747	0.7191873027685746	-0.059822489964754685	0.019719493792989196	CDK5;DPYSL2;PPP2R2A;ABAT
regulation of lipid metabolic process (GO:0019216)	10/245	0.2592705276287015	0.7919746414988059	-0.08367825210781883	0.01951593615949703	VAV3;VAC14;CRTC3;EPHX2;KIT;STUB1;IRS2;EDF1;PIK3R6;MTOR
hexose metabolic process (GO:0019318)	8/187	0.2513982628140033	0.7919746414988059	-0.07414114135656555	0.01729163486401	GPI;PYGB;AGL;PPP2R5D;IRS2;TKT;ENO2;PRKACB
telomere organization (GO:0032200)	4/63	0.15029540054219986	0.687202763893917	-0.04404345707043043	0.01652184087171914	RAD50;RFC3;RFC4;RPA1
positive regulation of phospholipase C activity (GO:0010863)	4/67	0.17393995609385232	0.7327391307223446	-0.04019549190267966	0.012499412565435086	PRKAR2B;PRKAR2A;KIT;PRKACB
regulation of phosphoprotein phosphatase activity (GO:0043666)	3/32	0.0914969668970061	0.5554693442928136	-0.015701952298313684	0.009231834996199503	PPP1R12A;TIPRL;PPP6R3
regulation of phosphatase activity (GO:0010921)	5/102	0.23239612017016822	0.7919746414988059	-0.03615110609632576	0.008431374471852453	FARP1;PPP1R12A;FKBP15;TIPRL;PPP6R3
regulation of actin filament polymerization (GO:0030833)	5/104	0.2438092927526825	0.7919746414988059	-0.028696216181451028	0.00669270101740085	ARPC1B;WASH1;ARPC5;MTOR;PFN2
regulation of peptidyl-tyrosine phosphorylation (GO:0050730)	8/189	0.2600330720435816	0.7919746414988059	-0.01978697223447058	0.004614834526181332	VTN;SHC1;KIT;DVL2;MIF;ARHGEF2;ISL1;MTOR
regulation of extrinsic apoptotic signaling pathway (GO:2001236)	7/161	0.2588164010997541	0.7919746414988059	-0.004029134151083925	0.0009396984627413818	DAB2;CTTN;TRAF2;PARK7;ARHGEF2;DBH;STK3
purine nucleotide biosynthetic process (GO:0006164)	6/132	0.25058618872160376	0.7919746414988059	0.007604181003881448	-0.001773492003941413	NME7;NPR2;ATP5H;HPRT1;GART;ATP5L
positive regulation of DNA binding (GO:0043388)	3/33	0.09765008812619001	0.5669379451050117	0.006067211416214609	-0.0034431753963760376	EDF1;PARK7;ISL1
response to cocaine (GO:0042220)	3/34	0.10396588884413857	0.5848705728070318	0.00666839020630517	-0.00357668910777353	CDK5;DPYSL2;ABAT
negative regulation of chromatin modification (GO:1903309)	3/34	0.10396588884413857	0.5848705728070318	0.007180700657839222	-0.0038514743490552744	KDM1A;CTBP1;SUPT6H
DNA-templated transcription, initiation (GO:0006352)	1/220	0.9990387742519445	0.9990387742519445	4.790692177771205	-0.004607151283404911	GTF3C4
inorganic cation transmembrane transport (GO:0098662)	6/440	0.9943663982989684	0.9986352194065561	4.582530155100598	-0.006258419881641007	TRAPPC10;COX4I1;ATP6V1H;SLC3A2;ATP5H;ATP5L
anion transport (GO:0006820)	5/443	0.9982840818469898	0.9986352194065561	4.643243413937249	-0.006341336753613924	STXBP1;ASNA1;PITPNM3;ABCA7;SLC3A2
organic anion transport (GO:0015711)	4/328	0.9922709519462776	0.9986352194065561	4.653727373998028	-0.006355654831588748	STXBP1;PITPNM3;SLC3A2;ABCA7
regulation of ion transmembrane transport (GO:0034765)	4/314	0.9892739610795066	0.9986352194065561	4.658219035379927	-0.006361789150827824	FHL1;PDE4B;IRS2;SRI
extracellular matrix organization (GO:0030198)	5/359	0.9883732710490207	0.9986352194065561	4.673183096493809	-0.006382225759953237	VTN;CAPNS1;CASP3;NDNF;EMILIN1
extracellular structure organization (GO:0043062)	5/360	0.9886240600481425	0.9986352194065561	4.675035701222464	-0.006384755885860588	VTN;CAPNS1;CASP3;NDNF;EMILIN1
alcohol metabolic process (GO:0006066)	4/340	0.9941854204561835	0.9986352194065561	4.691852763679616	-0.00640772316255499	HDLBP;PARK7;LBR;ADH5
organic hydroxy compound metabolic process (GO:1901615)	6/476	0.9974424249498975	0.9986352194065561	4.752067099765764	-0.006489958649363933	HDLBP;PARK7;HPRT1;DBH;LBR;ADH5
sensory perception of light stimulus (GO:0050953)	1/198	0.9980712995851649	0.9986352194065561	4.754343057793836	-0.006493066954272045	GPR98
visual perception (GO:0007601)	1/195	0.9978793430009326	0.9986352194065561	4.761145573477432	-0.006502357236705211	GPR98
regulation of membrane potential (GO:0042391)	3/266	0.9901089574796299	0.9986352194065561	4.766610466653706	-0.006509820711019149	CDK5;SRI;PARK7
epithelium development (GO:0060429)	3/256	0.9873080386820269	0.9986352194065561	4.802169602355426	-0.0065583842761932735	LDB1;SMAD9;XP32
carboxylic acid transport (GO:0046942)	2/224	0.9932101460888918	0.9986352194065561	4.807491500284701	-0.006565652460074523	STXBP1;SLC3A2
organic acid transport (GO:0015849)	2/226	0.9935767697607825	0.9986352194065561	4.812484164922804	-0.006572471005850743	STXBP1;SLC3A2
regulation of innate immune response (GO:0045088)	2/254	0.9970669971730965	0.9986352194065561	4.87630742622865	-0.006659635247863006	MAPK1;PPP2R5D
cellular response to abiotic stimulus (GO:0071214)	2/232	0.9945642875257665	0.9986352194065561	4.880013383080342	-0.006664696520403747	FIGNL1;ARHGEF2
regulation of hormone levels (GO:0010817)	2/229	0.9940906780380748	0.9986352194065561	4.88619998743414	-0.006673145644878043	SGPL1;VGF
regulation of leukocyte differentiation (GO:1902105)	2/210	0.9900058776604239	0.9986352194065561	4.900436209344893	-0.006692588234720369	SART1;AP3D1
aminoglycan metabolic process (GO:0006022)	1/171	0.9954730612843555	0.9986352194065561	4.919044160481402	-0.006718001350926425	NDNF
potassium ion transport (GO:0006813)	1/151	0.9914919839709717	0.9986352194065561	4.940649402811596	-0.006747507905945263	NSF
response to steroid hormone (GO:0048545)	4/369	0.9971152748501166	0.9986352194065561	4.943780902663681	-0.006751784635234612	AGL;TRIM25;MAPK1;ISL1
translational initiation (GO:0006413)	1/139	0.9875817878731021	0.9986352194065561	4.951593684332601	-0.006762454650809582	LARP1
glycosaminoglycan metabolic process (GO:0030203)	1/162	0.9939860111686679	0.9986352194065561	4.952083939614838	-0.006763124198701595	NDNF
G-protein coupled receptor signaling pathway, coupled to cyclic nucleotide second messenger (GO:0007187)	1/153	0.992011906479362	0.9986352194065561	4.957027618158391	-0.006769875843543686	PRKACB
hormone metabolic process (GO:0042445)	1/158	0.9931771861720587	0.9986352194065561	4.968930067880409	-0.00678613117094128	SGPL1
anterior/posterior pattern specification (GO:0009952)	1/150	0.9912194959865641	0.9986352194065561	4.977877442463346	-0.00679835071453032	PBX1
macromolecular complex disassembly (GO:0032984)	1/142	0.9887016698769472	0.9986352194065561	4.979421212265404	-0.006800459060639319	KIF2A
protein K63-linked ubiquitination (GO:0070534)	3/32	0.0914969668970061	0.5554693442928136	0.011619917673875515	-0.006831835977884211	TRAF2;STUB1;TRIM56
cytosolic calcium ion homeostasis (GO:0051480)	1/176	0.9961342044748834	0.9986352194065561	5.020218442856031	-0.006856176358813578	CHERP
positive regulation of cytosolic calcium ion concentration (GO:0007204)	1/152	0.9917560339244943	0.9986352194065561	5.055238083020041	-0.006904003128050744	CHERP
cellular response to acid chemical (GO:0071229)	1/147	0.9903486701320101	0.9986352194065561	5.108380581660815	-0.0069765805162613406	CPEB4
humoral immune response (GO:0006959)	2/263	0.9977259073659466	0.9986352194065561	5.701847447839399	-0.0077870857848962175	IGHG3;GPI
mitotic recombination (GO:0006312)	3/31	0.08551242281241367	0.541642161422059	0.012783502444011358	-0.00783820087208347	RFC3;RFC4;RPA1
protein activation cascade (GO:0072376)	1/196	0.9979453579495194	0.9986352194065561	5.937644106482421	-0.008109116289121804	IGHG3
regulation of phospholipase C activity (GO:1900274)	4/69	0.18621415471954222	0.7502915190947231	0.029951830274870406	-0.0086049648286013	PRKAR2B;PRKAR2A;KIT;PRKACB
complement activation (GO:0006956)	1/175	0.9960101741504501	0.9986352194065561	6.328306049717358	-0.008642648287775586	IGHG3
regulation of polysaccharide biosynthetic process (GO:0032885)	3/35	0.11043836601927647	0.6028619277879418	0.017208130779596355	-0.008708468563858648	EPM2AIP1;IRS2;MTOR
complement activation, classical pathway (GO:0006958)	1/162	0.9939860111686679	0.9986352194065561	6.556480162354028	-0.008954268583696972	IGHG3
negative regulation of cell activation (GO:0050866)	1/135	0.9859145040383211	0.9981989496208563	5.196619482572515	-0.009367811974551948	CASP3
regulation of metal ion transport (GO:0010959)	3/250	0.9852775168062996	0.9979092798422778	4.836209164434879	-0.010121744545519135	FHL1;PDE4B;SRI
cellular carbohydrate catabolic process (GO:0044275)	3/31	0.08551242281241367	0.541642161422059	0.01831574418139814	-0.011230293313140238	PYGB;AGL;IDNK
dephosphorylation (GO:0016311)	11/278	0.2760475220232287	0.8069204675453048	0.05552133426344372	-0.011911001211343702	NT5C3A;PPM1B;PPP3CB;PPP1R12A;EPHX2;PPP2R2A;PPP2R5D;PTPN23;SBF1;PPM1G;ILKAP
regulation of filopodium assembly (GO:0051489)	3/35	0.11043836601927647	0.6028619277879418	0.023663927970685478	-0.011975535022925001	MYO10;DPYSL3;FNBP1L
mRNA catabolic process (GO:0006402)	2/193	0.9840997844590368	0.9974268663583394	4.732719623506855	-0.012193614716426627	PPP2R2A;EDC3
protein complex disassembly (GO:0043241)	1/132	0.9845190737810765	0.9974963469303105	5.048513544436423	-0.012655575637305185	KIF2A
positive regulation of innate immune response (GO:0045089)	2/190	0.9827528554983445	0.9971277634810174	4.8975294129925615	-0.014087103277543823	MAPK1;PPP2R5D
negative regulation of MAPK cascade (GO:0043409)	1/130	0.983512984641648	0.9971874967275747	5.16802128138942	-0.01455555514737879	LEMD2
circulatory system process (GO:0003013)	1/130	0.983512984641648	0.9971874967275747	5.185827659879807	-0.01460570620326265	RAP1GDS1
sulfur compound metabolic process (GO:0006790)	5/314	0.96986661635042	0.9965520323901584	4.480276490253554	-0.015474541437575828	GGCT;CBS;TECR;NDNF;SUCLG1
sensory perception (GO:0007600)	8/457	0.9762877942495297	0.9965520323901584	4.496604246187925	-0.015530936290960142	CDK5;OBP2A;MYO1A;GPR98;CASP3;MAPK1;TBL1X;NIPSNAP1
phospholipid metabolic process (GO:0006644)	4/288	0.9805535769604274	0.9965520323901584	4.5771370695354845	-0.01580909066707684	ARF3;VAC14;PITPNM3;PIK3R6
regulation of transmembrane transport (GO:0034762)	5/327	0.9769739504730985	0.9965520323901584	4.585435239863032	-0.01583775192958353	FHL1;PDE4B;IRS2;PARK7;SRI
inflammatory response (GO:0006954)	6/376	0.9787425322036665	0.9965520323901584	4.6370760153598996	-0.016016115323457373	EPHX2;KIT;PARK7;MIF;S100A9;S100A8
cation homeostasis (GO:0055080)	8/465	0.9794903409965983	0.9965520323901584	4.696540841026654	-0.01622150240411193	PKHD1;VAPB;EPHX2;RAP1GDS1;ATP6V1H;ANXA7;IMMT;CHERP
tissue morphogenesis (GO:0048729)	6/358	0.9697359975396684	0.9965520323901584	4.723261124023635	-0.016313792272239495	EPB41L5;RBM15;DVL2;SCRIB;ISL1;PBX1
divalent metal ion transport (GO:0070838)	3/234	0.9782319825057711	0.9965520323901584	4.72647735840377	-0.01632490090633755	SLC3A2;SRI;CHERP
negative regulation of growth (GO:0045926)	3/221	0.9702516993665461	0.9965520323901584	4.738256550036167	-0.016365585357266683	CDK5;FHL1;STK3
nuclear-transcribed mRNA catabolic process (GO:0000956)	2/183	0.9791658509978874	0.9965520323901584	4.741628722602848	-0.016377232590251364	PPP2R2A;EDC3
divalent inorganic cation transport (GO:0072511)	3/238	0.9802463391135596	0.9965520323901584	4.741991040210579	-0.016378484008293667	SLC3A2;SRI;CHERP
cellular response to organic cyclic compound (GO:0071407)	4/291	0.9818264225210876	0.9965979262281809	4.806997701686562	-0.016381642407262725	PRKRA;PDE4B;SMAD9;ISL1
regulation of system process (GO:0044057)	6/371	0.9765280462345723	0.9965520323901584	4.758181763820278	-0.016434405562230716	CELF2;PARD3;EPHX2;PDE4B;SRI;DBH
cellular response to lipid (GO:0071396)	5/315	0.9704781949543996	0.9965520323901584	4.773565661684867	-0.01648754040011291	CTR9;DPYSL3;PDE4B;MAPK1;ISL1
morphogenesis of a branching structure (GO:0001763)	2/170	0.9705002149620906	0.9965520323901584	4.805536808760579	-0.01659796636183786	RBM15;PBX1
response to estrogen (GO:0043627)	2/166	0.9671968925852031	0.9965520323901584	4.816161014813562	-0.016634661578565194	TRIM25;MAPK1
regulation of ossification (GO:0030278)	2/173	0.9727650635954915	0.9965520323901584	4.844963623343352	-0.01673414364405247	CDK6;PBX1
regulation of calcium ion transport (GO:0051924)	2/171	0.9712746067441043	0.9965520323901584	4.867066754074743	-0.016810486212004948	PDE4B;SRI
intracellular receptor signaling pathway (GO:0030522)	2/186	0.9807838040295547	0.9965520323901584	4.868913339318776	-0.016816864179958257	CARM1;FKBP4
inorganic anion transport (GO:0015698)	1/127	0.9818802353345157	0.9965979262281809	5.0669492117549515	-0.017267524395447206	ASNA1
cellular response to radiation (GO:0071478)	1/126	0.9813008950924591	0.9965979262281809	5.151161804005228	-0.017554510297676497	FIGNL1
adenylate cyclase-modulating G-protein coupled receptor signaling pathway (GO:0007188)	1/122	0.9787927494147303	0.9965520323901584	5.110248899517499	-0.01765041923728115	PRKACB
nuclear-transcribed mRNA catabolic process, nonsense-mediated decay (GO:0000184)	1/117	0.9751805356959092	0.9965520323901584	5.143113884557177	-0.01776393244878677	PPP2R2A
embryonic organ morphogenesis (GO:0048562)	1/121	0.9781149331843292	0.9965520323901584	5.150114669093371	-0.017788112637361415	SP3
mucopolysaccharide metabolic process (GO:1903510)	1/124	0.9800861837182518	0.9965520323901584	5.1511999315142365	-0.017791861052964528	NDNF
regulation of gene expression, epigenetic (GO:0040029)	1/122	0.9787927494147303	0.9965520323901584	5.162701603342675	-0.017831586971152332	CTCF
translational elongation (GO:0006414)	1/114	0.9727249335502466	0.9965520323901584	5.164063358375808	-0.017836290371653147	TCEB2
cellular response to steroid hormone stimulus (GO:0071383)	1/123	0.9794496175875048	0.9965520323901584	5.167482645069694	-0.017848100333325515	ISL1
chromatin remodeling (GO:0006338)	1/118	0.9759490243752802	0.9965520323901584	5.187068780103098	-0.017915749385529256	SUPT6H
regulation of T cell proliferation (GO:0042129)	1/125	0.9807030739232432	0.9965520323901584	5.191271230101794	-0.01793026433494937	CASP3
transition metal ion homeostasis (GO:0055076)	1/120	0.9774155023617864	0.9965520323901584	5.204662354569114	-0.017976516281880787	ATP6V1H
cellular protein complex disassembly (GO:0043624)	1/113	0.9718536734636863	0.9965520323901584	5.210029746548741	-0.01799505485417228	KIF2A
multi-multicellular organism process (GO:0044706)	1/121	0.9781149331843292	0.9965520323901584	5.210479870354039	-0.017996609548283745	DBH
cell maturation (GO:0048469)	1/118	0.9759490243752802	0.9965520323901584	5.223364219530616	-0.018041111131090713	HBZ
calcium ion transport (GO:0006816)	3/215	0.9656996307912079	0.9961332660384284	4.6898779340489805	-0.018169661589698908	SLC3A2;SRI;CHERP
regulation of epidermal growth factor receptor signaling pathway (GO:0042058)	4/71	0.1987587203902129	0.7732397021436282	0.07086086963860014	-0.018223019520258586	SHC1;MVB12A;EPS15L1;ARHGEF7
neuropeptide signaling pathway (GO:0007218)	1/114	0.9727249335502466	0.9965520323901584	5.293753927113155	-0.018284231940517186	GPR98
negative regulation of leukocyte activation (GO:0002695)	1/120	0.9774155023617864	0.9965520323901584	5.297613535552059	-0.01829756274071458	CASP3
peptide metabolic process (GO:0006518)	1/113	0.9718536734636863	0.9965520323901584	5.306087542971531	-0.018326831331445578	GGCT
negative regulation of cell adhesion (GO:0007162)	1/115	0.9735692818739682	0.9965520323901584	5.311983919555131	-0.018347196977175916	EPB41L5
leukocyte activation involved in immune response (GO:0002366)	1/112	0.9709546458534595	0.9965520323901584	5.3303448359287895	-0.018410614215347298	KIT
cell activation involved in immune response (GO:0002263)	1/112	0.9709546458534595	0.9965520323901584	5.334486325579112	-0.01842491861226267	KIT
cellular response to inorganic substance (GO:0071241)	1/110	0.9690697282939803	0.9965520323901584	5.335639123933276	-0.018428900291951298	TRAF2
regulation of lipid biosynthetic process (GO:0046890)	1/113	0.9718536734636863	0.9965520323901584	5.372447681858092	-0.018556034310600388	MTOR
isoprenoid metabolic process (GO:0006720)	1/114	0.9727249335502466	0.9965520323901584	5.380825013740083	-0.01858496899122249	ADH5
response to interferon-gamma (GO:0034341)	1/108	0.9670627758139837	0.9965520323901584	5.400368045056026	-0.018652469166395225	EPRS
tube development (GO:0035295)	2/164	0.9654146349500611	0.9961332660384284	4.835470395284224	-0.018733720140444995	KIT;SMAD9
nucleoside triphosphate biosynthetic process (GO:0009142)	4/69	0.18621415471954222	0.7502915190947231	0.0687332156970876	-0.019746603069072867	NME7;CTPS2;ATP5H;ATP5L
regulation of osteoblast differentiation (GO:0045667)	1/106	0.9649259061810219	0.996097741262732	5.354245392181707	-0.02093452344384142	CDK6
regulation of wound healing (GO:0061041)	1/107	0.966011092733469	0.9961332660384284	5.449317926295877	-0.021111906110953767	VTN
regulation of cytokine secretion (GO:0050707)	1/106	0.9649259061810219	0.996097741262732	5.53625207582219	-0.02164614999558132	MIF
morphogenesis of a branching epithelium (GO:0061138)	2/162	0.9635395987494225	0.9953892549376526	4.776099546317221	-0.022072301471250347	RBM15;PBX1
regulation of phosphatidylinositol 3-kinase activity (GO:0043551)	3/36	0.11706143257390844	0.6071947273929548	0.04626864795113043	-0.023083693878990053	VAV3;KIT;PIK3R6
transforming growth factor beta receptor signaling pathway (GO:0007179)	6/134	0.26091753105861115	0.7919746414988059	0.10359376882336185	-0.024160750588736485	PARD3;ZYX;SMAD9;STUB1;NEDD8;FERMT2
post-translational protein modification (GO:0043687)	3/211	0.9623088774257308	0.9944790869908352	4.536344924278908	-0.02511415621004986	LMAN1;STT3A;MOGS
transcription from RNA polymerase II promoter (GO:0006366)	9/470	0.9612027738135952	0.9939614661365053	4.489228437913251	-0.027190536303568626	PSMC5;LDB1;RNMT;DVL2;TCEB2;YBX2;TCEB1;NELFA;CREB5
activation of protein kinase activity (GO:0032147)	10/252	0.2862581565121031	0.8069204675453048	0.13339959468217746	-0.02861823756455275	DAB2;DBNL;SHC1;PRKAR2B;PRKAR2A;KIT;MAPK1;TRAF2;PARK7;PRKACB
peptide cross-linking (GO:0018149)	3/31	0.08551242281241367	0.541642161422059	0.04708071424688432	-0.028867526492406516	NDNF;ABCA7;LOR
monovalent inorganic cation transport (GO:0015672)	7/384	0.9587181310797537	0.9931825349838826	4.407114064136903	-0.030148230375686303	NSF;COX4I1;TRAPPC10;ATP6V1H;SLC3A2;ATP5H;ATP5L
positive regulation of autophagy (GO:0010508)	3/33	0.09765008812619001	0.5669379451050117	0.05344598430241933	-0.030330886062975602	LARP1;SQSTM1;PAFAH1B2
phospholipid biosynthetic process (GO:0008654)	3/206	0.9576275949307139	0.9931825349838826	4.5108699871910805	-0.030858004941435358	ARF3;VAC14;PIK3R6
metal ion homeostasis (GO:0055065)	8/422	0.956218381075268	0.9931825349838826	4.572582304941384	-0.03128016718763038	PKHD1;VAPB;EPHX2;RAP1GDS1;ATP6V1H;ANXA7;IMMT;CHERP
morphogenesis of an epithelium (GO:0002009)	5/296	0.9566601406542439	0.9931825349838826	4.580110741061564	-0.0313316677894339	EPB41L5;RBM15;DVL2;SCRIB;PBX1
regulation of glycogen metabolic process (GO:0070873)	3/35	0.11043836601927647	0.6028619277879418	0.06301693941228456	-0.031890798767821645	EPM2AIP1;IRS2;MTOR
aging (GO:0007568)	3/204	0.9556069613323526	0.9931825349838826	4.685937276287446	-0.03205560701982807	DPYSL3;MIF;ADH5
xenobiotic metabolic process (GO:0006805)	2/156	0.9573116257457285	0.9931825349838826	4.701893989678936	-0.03216476386586483	GGCT;EPHX2
regulation of G2/M transition of mitotic cell cycle (GO:0010389)	3/34	0.10396588884413857	0.5848705728070318	0.060553187213764174	-0.032478592051145824	PKIA;FHL1;PBX1
regulation of ERBB signaling pathway (GO:1901184)	4/74	0.2180312833588374	0.7919746414988059	0.14247725018160629	-0.0332293857565543	SHC1;MVB12A;EPS15L1;ARHGEF7
negative regulation of immune response (GO:0050777)	1/103	0.9614585068008179	0.9939614661365053	5.498078515928263	-0.033300979345285656	PPP3CB
cellular response to starvation (GO:0009267)	4/74	0.2180312833588374	0.7919746414988059	0.15271566766541805	-0.0356172499501191	ASNS;GLUL;SQSTM1;CPEB4
regulation of generation of precursor metabolites and energy (GO:0043467)	4/74	0.2180312833588374	0.7919746414988059	0.15411916717406773	-0.035944582394580295	EPM2AIP1;IRS2;PARK7;MTOR
peptidyl-tyrosine dephosphorylation (GO:0035335)	1/102	0.9602283143720263	0.99341190471955	5.512863107361762	-0.036439432881632434	PTPN23
carbohydrate transport (GO:0008643)	1/102	0.9602283143720263	0.99341190471955	5.518000872939759	-0.03647339296014245	SEH1L
negative regulation of lymphocyte activation (GO:0051250)	1/102	0.9602283143720263	0.99341190471955	5.562596942806634	-0.03676816819091655	CASP3
limb morphogenesis (GO:0035108)	1/101	0.9589589455224127	0.9931825349838826	5.470474170993285	-0.03742247492830579	PBX1
appendage morphogenesis (GO:0035107)	1/101	0.9589589455224127	0.9931825349838826	5.4790379649197325	-0.03748105821624141	PBX1
RNA 3'-end processing (GO:0031123)	1/101	0.9589589455224127	0.9931825349838826	5.496327350028903	-0.03759933161641656	SYMPK
tube morphogenesis (GO:0035239)	1/101	0.9589589455224127	0.9931825349838826	5.521171474741752	-0.03776928555553068	SCRIB
protein trimerization (GO:0070206)	3/35	0.11043836601927647	0.6028619277879418	0.07489109450872605	-0.0378999178118465	BRK1;TRAF2;MIF
sensory perception of chemical stimulus (GO:0007606)	1/100	0.9576491554562512	0.9931825349838826	5.55189666582353	-0.037979470752825276	OBP2A
negative regulation of neurogenesis (GO:0050768)	8/192	0.2731502149308467	0.8000403823515221	0.17378415266307815	-0.038770040942838285	GDI1;DYNLT1;CDK5;DPYSL3;ARHGEF2;FKBP4;ISL1;PBX1
developmental growth (GO:0048589)	7/163	0.2682735444320338	0.7919746414988059	0.1828628216678808	-0.04264834725536041	CYFIP1;EPB41L5;PPP3CB;CDK5;MAP1B;TBCE;DCX
vesicle docking (GO:0048278)	3/34	0.10396588884413857	0.5848705728070318	0.08350566376691823	-0.04478949023560887	STXBP1;VPS33A;VPS33B
multicellular organismal development (GO:0007275)	9/453	0.9488276968121635	0.9895364758833124	4.269533658088347	-0.04490973736288807	RTL1;SPATA16;LDB1;EDF1;NELFA;ERC1;SPATA5;DCAF7;RBM11
regulation of endocytosis (GO:0030100)	7/165	0.27782309882163425	0.8069204675453048	0.21070117268110775	-0.045201758140899384	RUFY1;VTN;DAB2;LRSAM1;HIP1;ABCA7;SCYL2
activation of innate immune response (GO:0002218)	2/151	0.9513563939009643	0.9903578273258941	4.7355281616959735	-0.045882340164921	MAPK1;PPP2R5D
leukocyte activation (GO:0045321)	7/373	0.9498392640872068	0.9897739493116382	4.597316610010782	-0.04725441964010524	PPP3CB;CDK6;TXLNA;SP3;KIT;PFDN1;HPRT1
muscle tissue development (GO:0060537)	1/97	0.9534642112124498	0.9914633333412093	5.577419411103157	-0.047816960689220915	CDK5
regeneration (GO:0031099)	1/97	0.9534642112124498	0.9914633333412093	5.65544897830845	-0.048485932568980344	ISL1
terpenoid metabolic process (GO:0006721)	1/97	0.9534642112124498	0.9914633333412093	5.671492730743934	-0.048623480675545165	ADH5
regulation of JUN kinase activity (GO:0043506)	4/75	0.22456527870903087	0.7919746414988059	0.2090304438994815	-0.04875131465792685	DAB2;DBNL;DVL2;TRAF2
negative regulation of cell growth (GO:0030308)	2/150	0.950073806826474	0.9897739493116382	4.757588296603476	-0.04890180357667968	CDK5;FHL1
negative regulation of intracellular signal transduction (GO:1902532)	13/345	0.30769625677935913	0.8095203073887572	0.23427473124043682	-0.049505394641308736	CRTC3;KDM1A;CUL3;PDCD6;DYRK1A;PARK7;MIF;LEMD2;UACA;PKHD1;PPM1B;FIGNL1;ARHGEF2
negative regulation of cell projection organization (GO:0031345)	5/106	0.25536738529274666	0.7919746414988059	0.21488374104635025	-0.05011645518803339	GDI1;CDK5;DPYSL3;FKBP4;PFN2
response to wounding (GO:0009611)	7/167	0.28745768464635707	0.8069204675453048	0.23419119180800071	-0.05024107590922484	ARF4;CASP3;DPYSL3;SCRIB;ISL1;S100A8;CORO1B
cellular chemical homeostasis (GO:0055082)	9/452	0.9480017154213162	0.9890377397865823	4.5733193640532255	-0.050410732303023016	PKHD1;VAPB;EPHX2;RAP1GDS1;ATP6V1H;ANXA7;IMMT;IRS2;CHERP
regulation of vasculature development (GO:1901342)	3/197	0.947804527032463	0.9890377397865823	4.710429628505748	-0.051922069755561434	PDCD6;ISL1;PIK3R6
regulation of fibroblast proliferation (GO:0048145)	4/75	0.22456527870903087	0.7919746414988059	0.2269031265670881	-0.052919687265549326	CDK6;S100A6;MIF;EMD
receptor clustering (GO:0043113)	3/36	0.11706143257390844	0.6071947273929548	0.1064694563024718	-0.05311822250230074	CDK5;NME7;GPHN
neural tube closure (GO:0001843)	4/76	0.2311493122697367	0.7919746414988059	0.23559746360542722	-0.054947431898297476	ENAH;DVL2;SCRIB;PRKACB
positive regulation of neurogenesis (GO:0050769)	5/283	0.9440449980090507	0.9875199021194742	4.463369596274789	-0.05605380001486699	CUL7;MAP1B;KIT;DPYSL3;NDNF
muscle contraction (GO:0006936)	3/195	0.9453514281729445	0.987569532632698	4.596294422563199	-0.05749215996768864	DPYSL3;RAP1GDS1;EMD
tube closure (GO:0060606)	4/77	0.2377804809694239	0.7919746414988059	0.24800212590869147	-0.057840520502475005	ENAH;DVL2;SCRIB;PRKACB
negative regulation of protein processing (GO:0010955)	6/316	0.933748826611166	0.9867835235362905	4.3592485565060555	-0.057998020544195464	GPI;VTN;SERPINB12;UBXN1;CDK5;PARK7
negative regulation of protein maturation (GO:1903318)	6/316	0.933748826611166	0.9867835235362905	4.361714769683081	-0.05803083250264505	GPI;VTN;SERPINB12;UBXN1;CDK5;PARK7
nucleotide-excision repair (GO:0006289)	4/75	0.22456527870903087	0.7919746414988059	0.24898609322023024	-0.05807000717017308	RFC3;RFC4;RPA1;MMS19
response to hydrogen peroxide (GO:0042542)	1/95	0.950447487893841	0.9897739493116382	5.66053017155313	-0.05818286857372245	PARK7
glycerophospholipid metabolic process (GO:0006650)	4/229	0.9306246995360146	0.9867835235362905	4.374662063030745	-0.0582030909494475	ARF3;VAC14;PITPNM3;PIK3R6
positive regulation of peptidyl-serine phosphorylation (GO:0033138)	4/78	0.24445589696424755	0.7919746414988059	0.24978759578647583	-0.05825693833233893	DOCK7;MIF;PARK7;PFN2
positive regulation of nervous system development (GO:0051962)	6/313	0.930102566918265	0.9867835235362905	4.389753494575324	-0.058403876278711984	CUL7;MAP1B;PARD3;KIT;DPYSL3;NDNF
negative regulation of peptidase activity (GO:0010466)	4/230	0.9320321404534795	0.9867835235362905	4.3954541450600475	-0.05847972110371854	GPI;VTN;SERPINB12;PARK7
lipid catabolic process (GO:0016042)	4/232	0.9347699399208558	0.9867835235362905	4.407409443641109	-0.05863878146555121	SGPL1;ABCD3;PRKACB;PAFAH1B2
regulation of cell growth (GO:0001558)	6/322	0.9405404920971386	0.9867835235362905	4.409279940728076	-0.05866366766487468	CDK5;MAP1B;FHL1;CDK11B;S100A9;S100A8
nucleic acid phosphodiester bond hydrolysis (GO:0090305)	4/230	0.9320321404534795	0.9867835235362905	4.417433716412665	-0.05877215031814339	RAD50;CASP3;DIS3L;KPNA1
cellular hormone metabolic process (GO:0034754)	1/95	0.950447487893841	0.9897739493116382	5.7319507356429895	-0.05891697883688906	SGPL1
organ morphogenesis (GO:0009887)	8/405	0.9418202067146317	0.9867835235362905	4.438336212565729	-0.05905024948720799	SGPL1;PRKRA;SP3;FHL1;DVL2;MAPK1;CTNNA2;PBX1
response to alcohol (GO:0097305)	5/274	0.9334647059904956	0.9867835235362905	4.452410609156427	-0.05923750358204416	TRIM25;ABAT;DBH;S100A9;S100A8
positive regulation of defense response (GO:0031349)	5/272	0.9308836308099081	0.9867835235362905	4.462467767548928	-0.0593713099643836	MAPK1;PPP2R5D;ZC3HAV1;S100A9;S100A8
muscle system process (GO:0003012)	4/237	0.9411830039803126	0.9867835235362905	4.469736109586958	-0.05946801228483623	RAP1GDS1;TBCE;DPYSL3;EMD
cellular component assembly involved in morphogenesis (GO:0010927)	3/186	0.9329341952262823	0.9867835235362905	4.500544237714757	-0.0598779018391764	TMOD1;PKHD1;SEPT2
embryonic morphogenesis (GO:0048598)	8/403	0.9398783157958768	0.9867835235362905	4.515192989005498	-0.06007279748857432	EPB41L5;LDB1;PRKRA;CUL3;SP3;DVL2;PBX1;RNF2
cellular ion homeostasis (GO:0006873)	8/402	0.9388862454214307	0.9867835235362905	4.532582861917723	-0.06030416264092813	PKHD1;VAPB;EPHX2;RAP1GDS1;ATP6V1H;ANXA7;IMMT;CHERP
positive regulation of protein kinase B signaling (GO:0051897)	4/78	0.24445589696424755	0.7919746414988059	0.2589472831003092	-0.060393214704691875	OSBPL8;PARK7;MTOR;STK3
regulation of type I interferon production (GO:0032479)	5/108	0.2670560847313748	0.7919746414988059	0.26116457927500014	-0.06091034561388211	PPM1B;DHX36;TRIM25;ZC3HAV1;TRIM56
regulation of cell division (GO:0051302)	4/234	0.9374075837746828	0.9867835235362905	4.6063472294175165	-0.061285567405127125	RANBP1;CUL7;CUL3;CCP110
positive regulation of growth (GO:0045927)	3/189	0.9373364053019457	0.9867835235362905	4.62945568370863	-0.06159301594570652	MAP1B;S100A9;S100A8
negative regulation of cytokine production (GO:0001818)	3/185	0.9314046936321647	0.9867835235362905	4.639404628024062	-0.06172538258397455	PPM1B;TIA1;TRIM25
positive regulation of JNK cascade (GO:0046330)	5/107	0.2611963019261166	0.7919746414988059	0.2654216213729869	-0.0619031981140222	DAB2;DBNL;DVL2;TRAF2;STK3
cellular cation homeostasis (GO:0030003)	8/389	0.9246293091479477	0.9859965437026388	4.43577470169116	-0.06255520115390113	PKHD1;VAPB;EPHX2;RAP1GDS1;ATP6V1H;ANXA7;IMMT;CHERP
activation of immune response (GO:0002253)	10/487	0.9441162496001584	0.9875199021194742	4.984150774335823	-0.06259409728957711	IGHG3;ENAH;VAV3;RNF31;MYO10;PDE4B;BRK1;MAPK1;PPP2R5D;ARPC5
branching morphogenesis of an epithelial tube (GO:0048754)	2/141	0.9369895279829251	0.9867835235362905	4.727484467928656	-0.06289724885819557	RBM15;PBX1
sodium ion transport (GO:0006814)	2/141	0.9369895279829251	0.9867835235362905	4.741319028101674	-0.06308131202750879	TRAPPC10;SLC3A2
innate immune response-activating signal transduction (GO:0002758)	2/144	0.94167576135379	0.9867835235362905	4.747109058063007	-0.0631583460099248	MAPK1;PPP2R5D
pattern recognition receptor signaling pathway (GO:0002221)	2/142	0.9385898968569754	0.9867835235362905	4.748111517266105	-0.06317168331994563	MAPK1;PPP2R5D
response to reactive oxygen species (GO:0000302)	2/141	0.9369895279829251	0.9867835235362905	4.7741699128253625	-0.06351837962354112	TRAF2;PARK7
response to corticosteroid (GO:0031960)	2/140	0.9353497146460449	0.9867835235362905	4.775784903825356	-0.06353986641879543	AGL;ISL1
response to carbohydrate (GO:0009743)	2/139	0.9336695716338614	0.9867835235362905	4.779782058591886	-0.06359304692944136	IRS2;GLUL
regulation of muscle system process (GO:0090257)	2/144	0.94167576135379	0.9867835235362905	4.7896543287532864	-0.06372439344942454	PDE4B;SRI
regulation of cytokine biosynthetic process (GO:0042035)	1/93	0.9472356633290454	0.9889641066475056	5.758784786199167	-0.06390662027151091	TIA1
cognition (GO:0050890)	9/227	0.3013965218020929	0.8095203073887572	0.3061606267508045	-0.06469584906010943	GPI;CYFIP1;PPP3CB;CDK5;ABI2;PRKAR2B;KIT;ABCA7;DBH
ribonucleoside monophosphate biosynthetic process (GO:0009156)	4/78	0.24445589696424755	0.7919746414988059	0.2795744596653234	-0.06520400664708088	ATP5H;HPRT1;GART;ATP5L
G2 DNA damage checkpoint (GO:0031572)	3/34	0.10396588884413857	0.5848705728070318	0.12157373510520765	-0.06520785987163649	BABAM1;BRE;BRCC3
cell fate commitment (GO:0045165)	2/134	0.9246317799067995	0.9859965437026388	4.692406138331023	-0.0661743279628666	CASP3;CTR9
leukocyte migration (GO:0050900)	9/226	0.2971878119550782	0.8095203073887572	0.32060191621230383	-0.06774748732316721	VAV3;SHC1;KIT;DPYSL3;PDE4B;SLC3A2;DBH;S100A9;S100A8
DNA damage checkpoint (GO:0000077)	4/77	0.2377804809694239	0.7919746414988059	0.29213850645668293	-0.06813426784289517	BABAM1;BRE;TIPRL;BRCC3
extrinsic apoptotic signaling pathway (GO:0097191)	1/92	0.9455526854285642	0.987569532632698	5.630895592197936	-0.07043333615853571	CASP3
adaptive immune response (GO:0002250)	1/91	0.9438161495482084	0.9875199021194742	5.637071314496392	-0.07079388370527198	GNL1
regulation of endothelial cell migration (GO:0010594)	1/92	0.9455526854285642	0.987569532632698	5.6772460325226906	-0.07101310470352756	PDCD6
iron ion homeostasis (GO:0055072)	1/92	0.9455526854285642	0.987569532632698	5.695472432426368	-0.07124108729179546	ATP6V1H
learning or memory (GO:0007611)	8/198	0.2999075056528176	0.8095203073887572	0.33744009494356203	-0.07130562045480368	GPI;PPP3CB;CDK5;ABI2;PRKAR2B;KIT;ABCA7;DBH
positive regulation of calcium ion transport (GO:0051928)	1/91	0.9438161495482084	0.9875199021194742	5.72211264854616	-0.07186188621525945	SRI
negative regulation of endopeptidase activity (GO:0010951)	4/222	0.9200154524146982	0.9836495597995922	4.361907864243579	-0.07190859752475712	GPI;VTN;SERPINB12;PARK7
glycerophospholipid biosynthetic process (GO:0046474)	3/178	0.9197698987107299	0.9836495597995922	4.439479387883919	-0.07318740937646107	ARF3;VAC14;PIK3R6
regulation of angiogenesis (GO:0045765)	3/179	0.9215356100596103	0.9841709632029785	4.588819308186078	-0.07321761282417111	PDCD6;ISL1;PIK3R6
detection of abiotic stimulus (GO:0009582)	3/178	0.9197698987107299	0.9836495597995922	4.451696705441586	-0.0733888189885916	STRC;GPR98;KIT
positive regulation of B cell proliferation (GO:0030890)	3/36	0.11706143257390844	0.6071947273929548	0.14724201438245269	-0.07345988561672133	VAV3;IRS2;MIF
intrinsic apoptotic signaling pathway (GO:0097193)	7/170	0.3020528112973774	0.8095203073887572	0.3529494884177953	-0.07458296342954072	SART1;HINT1;STK24;CUL3;CASP3;DYNLL1;UACA
RNA catabolic process (GO:0006401)	4/220	0.9167284213775267	0.9827273390115666	4.289391982128908	-0.07473653731992526	DIS3L;PPP2R2A;ABCE1;EDC3
regulation of cyclin-dependent protein serine/threonine kinase activity (GO:0000079)	1/89	0.9401755482022166	0.9867835235362905	5.645741966646956	-0.07511428961308457	CASP3
long-chain fatty acid metabolic process (GO:0001676)	1/86	0.9342686625680924	0.9867835235362905	5.67540241052231	-0.07550890969747166	EPHX2
cellular component biogenesis (GO:0044085)	1/89	0.9401755482022166	0.9867835235362905	5.693461662232821	-0.0757491806611807	GNL1
epithelial tube morphogenesis (GO:0060562)	1/90	0.9420243552746234	0.9867835235362905	5.700447647635588	-0.07584212634199224	SCRIB
regulation of erythrocyte differentiation (GO:0045646)	3/36	0.11706143257390844	0.6071947273929548	0.15352864723139523	-0.07659632280779441	CDK6;KDM1A;LDB1
regulation of fat cell differentiation (GO:0045598)	1/87	0.9362995986892603	0.9867835235362905	5.761699713664082	-0.07665706004853508	CARM1
striated muscle tissue development (GO:0014706)	1/85	0.9321731226824864	0.9867835235362905	5.765480980330938	-0.07670736825624214	CDK5
embryonic limb morphogenesis (GO:0030326)	1/86	0.9342686625680924	0.9867835235362905	5.765783868753751	-0.07671139806292583	PBX1
embryonic appendage morphogenesis (GO:0035113)	1/86	0.9342686625680924	0.9867835235362905	5.777302446174989	-0.07686464802820249	PBX1
cellular transition metal ion homeostasis (GO:0046916)	1/89	0.9401755482022166	0.9867835235362905	5.777375839799824	-0.07686562450038704	ATP6V1H
myeloid leukocyte activation (GO:0002274)	1/86	0.9342686625680924	0.9867835235362905	5.78672210182862	-0.0769899726971304	KIT
positive regulation of synaptic transmission (GO:0050806)	1/85	0.9321731226824864	0.9867835235362905	5.791211554659388	-0.07704970303233288	GLUL
cellular response to interferon-gamma (GO:0071346)	1/88	0.9382679184395146	0.9867835235362905	5.7922530496653195	-0.07706355969775759	EPRS
regulation of reproductive process (GO:2000241)	1/86	0.9342686625680924	0.9867835235362905	5.793601841768464	-0.0770815048254772	NPR2
negative regulation of proteolysis (GO:0045861)	6/302	0.9151813123893615	0.9821667272231737	4.287619120223446	-0.07715228333171205	GPI;VTN;SERPINB12;UBXN1;CDK5;PARK7
mRNA 3'-end processing (GO:0031124)	1/85	0.9321731226824864	0.9867835235362905	5.8048459637763585	-0.0772311032736414	SYMPK
regulation of coagulation (GO:0050818)	1/85	0.9321731226824864	0.9867835235362905	5.82079004981684	-0.07744323282251839	VTN
cAMP metabolic process (GO:0046058)	3/35	0.11043836601927647	0.6028619277879418	0.15305567389944655	-0.07745643857227796	DPYSL3;PDE4C;PDE4B
RNA phosphodiester bond hydrolysis (GO:0090501)	1/89	0.9401755482022166	0.9867835235362905	5.8307572134359225	-0.07757584186117578	DIS3L
regulation of striated muscle cell differentiation (GO:0051153)	1/85	0.9321731226824864	0.9867835235362905	5.83342029315955	-0.07761127304857418	MTOR
amide transport (GO:0042886)	1/83	0.9277799653674981	0.9867835235362905	5.8439714309470085	-0.07775165162488828	VGF
diterpenoid metabolic process (GO:0016101)	1/87	0.9362995986892603	0.9867835235362905	5.896918558281626	-0.07845609151609985	ADH5
response to purine-containing compound (GO:0014074)	2/132	0.9207015218658631	0.9836495597995922	4.770623947817049	-0.07864652076162869	VGF;CARM1
vascular process in circulatory system (GO:0003018)	1/86	0.9342686625680924	0.9867835235362905	5.935101120855201	-0.07896409490702078	RAP1GDS1
small GTPase mediated signal transduction (GO:0007264)	16/439	0.3249176917241099	0.8106726404691404	0.38409389755732615	-0.08061783519520085	ARF3;VAV3;ARF4;CYFIP1;DOCK4;DBNL;GDI1;SHC1;DOCK7;BRK1;PARK7;ABI2;ARFIP2;MAPK1;ARHGEF2;ARHGEF7
lung development (GO:0030324)	1/82	0.9254780504426204	0.9861594512771872	5.813255341431494	-0.08102063118229426	SP3
detection of external stimulus (GO:0009581)	3/175	0.9142533665256003	0.9819246882170722	4.455191898843085	-0.0812656665550325	STRC;GPR98;KIT
anterior/posterior axis specification (GO:0009948)	3/37	0.12382893725980264	0.6189090695908689	0.1704113115210007	-0.0817628217145427	EPB41L5;LDB1;RNF2
monovalent inorganic cation homeostasis (GO:0055067)	1/82	0.9254780504426204	0.9861594512771872	5.873458166531192	-0.08185969133053363	ATP6V1H
response to glucocorticoid (GO:0051384)	2/130	0.9165792066851703	0.9827273390115666	4.707494890790145	-0.08202138416230245	AGL;ISL1
regulation of protein acetylation (GO:1901983)	3/42	0.15961546000891458	0.7115146838014939	0.24647831401907144	-0.08389116765677737	CTBP1;PARK7;CTCF
positive regulation of neuron differentiation (GO:0045666)	4/217	0.9115719231116294	0.9807586791730705	4.335418374292793	-0.08423216902548102	CUL7;MAP1B;DPYSL3;NDNF
cell cycle arrest (GO:0007050)	6/140	0.29253145608015524	0.8069441911658211	0.39886848653965123	-0.08555759710535335	SART1;CDK6;CUL3;E4F1;PA2G4;PPM1G
response to amine (GO:0014075)	3/40	0.14493598271575198	0.6718805183538371	0.21605699364843864	-0.08592041187171504	DPYSL2;HPRT1;DBH
cellular response to peptide hormone stimulus (GO:0071375)	10/261	0.3220308281013191	0.8106726404691404	0.4119203326873359	-0.08645835225534566	C2CD5;SHC1;PRKAR2B;PRKAR2A;MAPK1;ATP6V1H;IRS2;SOGA1;PRKACB;MTOR
platelet degranulation (GO:0002576)	1/81	0.9231029325914941	0.9851049682139622	5.873248898064985	-0.08814029712134236	STXBP1
regulation of epithelial cell proliferation (GO:0050678)	5/258	0.9101927216156707	0.9801545249053266	4.466503655948885	-0.08953125012789495	CDK6;MAGED1;PDCD6;GLUL;MTOR
retinoid metabolic process (GO:0001523)	1/81	0.9231029325914941	0.9851049682139622	5.977811302171217	-0.08970947314735439	ADH5
amino acid transport (GO:0006865)	2/128	0.9122564722161497	0.9807586791730705	4.632401208852573	-0.09000220230915147	STXBP1;SLC3A2
single organism cell adhesion (GO:0098602)	10/259	0.31399269493019377	0.8095203073887572	0.42792502574121516	-0.09042630062594861	PKHD1;SHC1;GPR98;STXBP1;KIT;SCRIB;CTNNA2;S100A9;S100A8;FERMT2
glycerolipid metabolic process (GO:0046486)	6/296	0.9059304355971264	0.9783916728572931	4.191337349077621	-0.09156062623545444	ARF3;VAC14;PITPNM3;TECR;PRKACB;PIK3R6
regulation of cell cycle G2/M phase transition (GO:1902749)	3/36	0.11706143257390844	0.6071947273929548	0.18990508712440254	-0.0947447373407751	PKIA;FHL1;PBX1
protein homooligomerization (GO:0051260)	9/230	0.3141066725056232	0.8095203073887572	0.4496404089787577	-0.09501505252108364	CRTC3;ST13;DPYSL3;BRK1;TRAF2;MIF;HPRT1;DNM1L;GLUL
stem cell maintenance (GO:0019827)	5/109	0.2729449542781009	0.8000403823515221	0.4259540482594668	-0.09502739828529733	METTL14;STAG2;LDB1;KIT;CTR9
pigmentation (GO:0043473)	3/37	0.12382893725980264	0.6189090695908689	0.19827367726015271	-0.09513109886787549	DOCK7;KIT;ARCN1
response to axon injury (GO:0048678)	3/39	0.1377724443418352	0.6607501377878233	0.22984011251126812	-0.0952410348016694	ARF4;DPYSL3;ISL1
response to cold (GO:0009409)	3/36	0.11706143257390844	0.6071947273929548	0.19254903436871929	-0.09606381778774363	VGF;FAM175B;IMMT
ribonucleoside biosynthetic process (GO:0042455)	5/110	0.27886113768965776	0.8069204675453048	0.4531048461465765	-0.09720465912633902	NME7;CTPS2;ATP5H;HPRT1;ATP5L
regulation of organelle assembly (GO:1902115)	1/80	0.9206522892394273	0.9836495597995922	5.897643285392745	-0.09722609246984565	TBC1D5
response to alkaloid (GO:0043279)	5/111	0.28480286998884596	0.8069204675453048	0.4592890489951325	-0.09853135720731157	TMED10;CDK5;DPYSL2;PPP2R2A;ABAT
MAPK cascade (GO:0000165)	3/170	0.9042897198944879	0.9778707085094767	4.450977080221104	-0.09960315312971696	SHC1;MAPK1;PPP2R5D
negative regulation of response to DNA damage stimulus (GO:2001021)	3/42	0.15961546000891458	0.7115146838014939	0.29730327019207153	-0.1011899102923165	KDM1A;DYRK1A;MIF
regulation of hemostasis (GO:1900046)	1/79	0.9181237242958972	0.9827413894985064	5.895635249881959	-0.10263874337311002	VTN
regulation of blood coagulation (GO:0030193)	1/79	0.9181237242958972	0.9827413894985064	5.898333333782592	-0.1026857150613741	VTN
cilium organization (GO:0044782)	2/125	0.9053776089527509	0.9783916728572931	4.72719373163037	-0.10326651909793001	PKHD1;SEPT2
intrinsic apoptotic signaling pathway in response to DNA damage (GO:0008630)	1/79	0.9181237242958972	0.9827413894985064	5.968770557347234	-0.10391197615232446	UACA
positive regulation of actin filament bundle assembly (GO:0032233)	3/43	0.167118984585323	0.7191873027685746	0.31897371672221	-0.10514440690676971	SYNPO;MTOR;PFN2
multicellular organism growth (GO:0035264)	1/79	0.9181237242958972	0.9827413894985064	6.060775620355241	-0.10551371772059646	DPYSL3
chromosome organization (GO:0051276)	8/204	0.32723214400753026	0.8106726404691404	0.5078431104372465	-0.10659167574027295	NDC1;RFC3;RAD50;STAG2;RFC4;LDB1;RPA1;PDS5B
regulation of lymphocyte differentiation (GO:0045619)	2/124	0.9029749082688654	0.9778707085094767	4.7647676983709895	-0.10662510233928219	SART1;AP3D1
palate development (GO:0060021)	1/78	0.915514765776594	0.9821667272231737	5.934519244708557	-0.1067869363781994	SGPL1
positive regulation of leukocyte mediated immunity (GO:0002705)	1/78	0.915514765776594	0.9821667272231737	6.012136177905276	-0.10818359113073715	TRAF2
positive regulation of protein import into nucleus (GO:0042307)	4/80	0.2579280128153895	0.7919746414988059	0.46633101381691144	-0.10876047318863621	DAB2;UACA;KPNA1;CHERP
positive regulation of mitotic cell cycle phase transition (GO:1901992)	3/40	0.14493598271575198	0.6718805183538371	0.27365433207643436	-0.10882541928147502	CUL3;PLRG1;PBX1
defense response to other organism (GO:0098542)	7/328	0.8935133075192865	0.974058224724634	4.160987172592894	-0.1093682113366758	SEH1L;VGF;TRIM25;ZC3HAV1;S100A9;S100A8;TRIM56
axon cargo transport (GO:0008088)	3/40	0.14493598271575198	0.6718805183538371	0.27578381884314623	-0.1096722624082889	AP3D1;KIF1B;AP3B2
negative regulation of locomotion (GO:0040013)	8/204	0.32723214400753026	0.8106726404691404	0.5310922076411263	-0.11147145096903677	RNF20;OSBPL8;STK24;DPYSL3;TRIM25;PTPN23;TRIM56;PFN2
negative regulation of viral genome replication (GO:0045071)	3/40	0.14493598271575198	0.6718805183538371	0.280318309763653	-0.11147551497114021	SRPK2;ZC3HAV1;SRPK1
positive regulation of cell cycle phase transition (GO:1901989)	3/43	0.167118984585323	0.7191873027685746	0.3396903157050341	-0.11197329091501365	CUL3;PLRG1;PBX1
regulation of polysaccharide metabolic process (GO:0032881)	3/41	0.1522190616361561	0.6882528001482161	0.3017032718607189	-0.11271606071605926	EPM2AIP1;IRS2;MTOR
detection of mechanical stimulus (GO:0050982)	3/39	0.1377724443418352	0.6607501377878233	0.2728487076402096	-0.1130629156765563	STRC;GPR98;KIT
regulation of lipid catabolic process (GO:0050994)	3/44	0.17472348149085087	0.7327391307223446	0.3640693746286553	-0.11321302714596547	CRTC3;IRS2;MTOR
leukocyte differentiation (GO:0002521)	5/251	0.897946420688883	0.974058224724634	4.317809449216986	-0.11349015912952001	PPP3CB;CDK6;KDM1A;SP3;KIT
regulation of lyase activity (GO:0051339)	1/77	0.9128228634919541	0.9807586791730705	5.860248317239052	-0.11385785273133914	PARK7
regionalization (GO:0003002)	5/247	0.8903194692113915	0.9734981047432515	4.270127686714849	-0.1146930719440974	NME7;ISL1;DPCD;SSBP3;PBX1
protein localization to plasma membrane (GO:0072659)	1/77	0.9128228634919541	0.9807586791730705	5.903445066240369	-0.1146971156464952	MAP7
gastrulation (GO:0007369)	3/44	0.17472348149085087	0.7327391307223446	0.3694257653491181	-0.1148786800415398	LDB1;CUL3;RNF2
regulated secretory pathway (GO:0045055)	3/36	0.11706143257390844	0.6071947273929548	0.23047448692937367	-0.11498504362639311	TMED10;CDK5;KIT
organic hydroxy compound biosynthetic process (GO:1901617)	3/166	0.8955791370384737	0.974058224724634	4.400321092135597	-0.1156589115015288	PARK7;DBH;LBR
GTP catabolic process (GO:0006184)	5/243	0.8822082604549905	0.9717274565197493	4.044321561463667	-0.11599077178784287	ARF3;SRP54;DNM1L;GNL1;DNM2
response to light stimulus (GO:0009416)	7/322	0.8829531741921921	0.9721714391802534	4.1317179654416645	-0.11660994020067625	CDK5;CASP3;KIT;ASNS;DBH;UACA;TROVE2
lymphocyte costimulation (GO:0031294)	1/77	0.9128228634919541	0.9807586791730705	6.013226927264207	-0.11683005034283815	MTOR
positive regulation of transmembrane transport (GO:0034764)	1/77	0.9128228634919541	0.9807586791730705	6.034406073950732	-0.11724153668844507	PARK7
tube formation (GO:0035148)	5/114	0.30276385546556267	0.8095203073887572	0.5565165875550397	-0.11759942331583109	ENAH;DVL2;SCRIB;PRKACB;STK3
cellular metal ion homeostasis (GO:0006875)	8/361	0.8839965415911921	0.9724667616419225	4.24205125471149	-0.11843545086011935	PKHD1;VAPB;EPHX2;RAP1GDS1;ATP6V1H;ANXA7;IMMT;CHERP
platelet activation (GO:0030168)	4/205	0.8880085021041043	0.9724667616419225	4.255840574264994	-0.11882044014485739	VAV3;SHC1;MAPK1;PIK3R6
modification of morphology or physiology of other organism (GO:0035821)	1/76	0.9100453865268403	0.9801545249053266	5.937743108482688	-0.119022305675872	VAPB
water transport (GO:0006833)	3/41	0.1522190616361561	0.6882528001482161	0.3188030693942471	-0.11910452911129521	PRKAR2B;PRKAR2A;PRKACB
regulation of cell shape (GO:0008360)	5/112	0.2907683953764754	0.8069204675453048	0.5568273652367257	-0.11945626865474734	CYFIP1;MYO10;KIT;ANXA7;FERMT2
RNA export from nucleus (GO:0006405)	1/76	0.9100453865268403	0.9801545249053266	5.971999814704603	-0.11970898276595501	NXF1
regulation of extrinsic apoptotic signaling pathway via death domain receptors (GO:1902041)	3/45	0.18242284669082248	0.747565671453457	0.41163061674545925	-0.11975698076534648	PARK7;ARHGEF2;STK3
skeletal system development (GO:0001501)	3/162	0.8861640336121835	0.9724667616419225	4.295352569988618	-0.1199235906602391	SP3;WDR5;PBX1
positive regulation of neuron apoptotic process (GO:0043525)	3/47	0.19808207195962932	0.7732397021436282	0.46760479459734	-0.12025214117711144	SRPK2;CDK5;CASP3
T cell costimulation (GO:0031295)	1/76	0.9100453865268403	0.9801545249053266	6.046341660288409	-0.12119916812896667	MTOR
purine-containing compound biosynthetic process (GO:0072522)	6/146	0.32486762263870383	0.8106726404691404	0.5784268712744567	-0.1214065687516424	NME7;NPR2;ATP5H;HPRT1;GART;ATP5L
glycerolipid biosynthetic process (GO:0045017)	4/202	0.8813218993270888	0.9714425007705915	4.194214266959424	-0.12151980019086556	ARF3;VAC14;TECR;PIK3R6
double-strand break repair (GO:0006302)	5/114	0.30276385546556267	0.8095203073887572	0.5803003778755489	-0.1226252573852961	BABAM1;RAD50;BRE;RPA1;BRCC3
toll-like receptor signaling pathway (GO:0002224)	2/122	0.8979979640194069	0.974058224724634	4.681169900267423	-0.12304079722416	MAPK1;PPP2R5D
epidermis development (GO:0008544)	2/120	0.8927843721470087	0.974058224724634	4.684902138703921	-0.12313889611876136	LDB1;XP32
response to endoplasmic reticulum stress (GO:0034976)	6/145	0.31943934106004873	0.8106726404691404	0.5874776458777397	-0.12330624448196943	CUL7;SHC1;VAPB;DCTN1;ASNS;TXNDC5
vitamin metabolic process (GO:0006766)	2/122	0.8979979640194069	0.974058224724634	4.6921856762161385	-0.12333033806195255	GPHN;AASDHPPT
microtubule bundle formation (GO:0001578)	3/40	0.14493598271575198	0.6718805183538371	0.3105797731202458	-0.12350973497732076	MAP2;MAP1B;MAP7
actin cytoskeleton reorganization (GO:0031532)	3/41	0.1522190616361561	0.6882528001482161	0.33085471261640664	-0.12360701176844165	SHC1;KIT;CDC42BPB
signal transduction by phosphorylation (GO:0023014)	4/202	0.8813218993270888	0.9714425007705915	4.287083968151214	-0.12421053242682095	SHC1;KIT;MAPK1;PPP2R5D
positive regulation of cell division (GO:0051781)	2/120	0.8927843721470087	0.974058224724634	4.728719053237759	-0.12429058858261283	RANBP1;CUL3
positive regulation of cell development (GO:0010720)	8/358	0.8787228989381807	0.9704679234769479	4.1511986640062055	-0.1244401853860937	EPB41L5;DAB2;CUL7;MAP1B;DPYSL3;KIT;NDNF;ARHGEF7
regulation of ERK1 and ERK2 cascade (GO:0070372)	3/161	0.883694950891656	0.9724667616419225	4.486537756363102	-0.12526136297519852	PKHD1;ABCA7;MIF
regulation of protein serine/threonine kinase activity (GO:0071900)	15/416	0.34687413937559597	0.8159963567622832	0.6168515658231823	-0.12543392147192906	DBNL;SHC1;MAGED1;TRAF2;MIF;PIK3R6;STK3;DAB2;PRKAR2B;CASP3;PRKAR2A;PKIA;KIT;DVL2;MAPK1
sterol metabolic process (GO:0016125)	2/119	0.8900857975119817	0.9734981047432515	4.685485375325029	-0.1258493306692203	HDLBP;LBR
learning (GO:0007612)	5/115	0.3087903353179719	0.8095203073887572	0.5987911750881785	-0.12653261097992755	PPP3CB;CDK5;PRKAR2B;KIT;DBH
response to bacterium (GO:0009617)	4/201	0.879017359661258	0.9704679234769479	4.221035090191813	-0.12653366693796245	SEH1L;VGF;S100A9;S100A8
immune response-activating signal transduction (GO:0002757)	10/440	0.8893556692646613	0.9734981047432515	4.7199841470545305	-0.12677594701380057	IGHG3;ENAH;RNF31;VAV3;MYO10;PDE4B;BRK1;MAPK1;PPP2R5D;ARPC5
protein deubiquitination (GO:0016579)	4/80	0.2579280128153895	0.7919746414988059	0.544759737125796	-0.12705208323798173	OTUD4;BABAM1;USP5;BRCC3
steroid metabolic process (GO:0008202)	5/240	0.8757941430497047	0.9695440026599299	4.107898070028005	-0.12705489801733227	SGPL1;HDLBP;ACBD3;LBR;PBX1
visual learning (GO:0008542)	3/44	0.17472348149085087	0.7327391307223446	0.40887745736282666	-0.1271467964780238	CDK5;KIT;DBH
negative regulation of nucleotide metabolic process (GO:0045980)	1/75	0.9071796207189458	0.9783916728572931	5.834293068116623	-0.12745133175106685	ABCA7
muscle cell differentiation (GO:0042692)	2/119	0.8900857975119817	0.9734981047432515	4.747037092383277	-0.12750257292115763	CTNNA2;ISL1
nucleotide biosynthetic process (GO:0009165)	8/208	0.345686563491226	0.8159963567622832	0.6275479176985548	-0.12760897530255544	RRM1;NME7;NPR2;CTPS2;HPRT1;ATP5H;GART;ATP5L
response to hypoxia (GO:0001666)	5/241	0.8779643485417602	0.9704355255549033	4.289154940050049	-0.12871888155110253	SMAD9;TCEB2;ABAT;TCEB1;MTOR
protein peptidyl-prolyl isomerization (GO:0000413)	3/41	0.1522190616361561	0.6882528001482161	0.3445639433837706	-0.12872876758505747	FKBP15;PPIH;FKBP4
response to vitamin (GO:0033273)	1/75	0.9071796207189458	0.9783916728572931	5.902303497593341	-0.12893703356764832	TRIM25
JAK-STAT cascade (GO:0007259)	3/44	0.17472348149085087	0.7327391307223446	0.414751467851623	-0.12897341128077144	CTR9;MAPK1;IRS2
erythrocyte differentiation (GO:0030218)	3/48	0.20603005565008414	0.785455064703538	0.5346709028570618	-0.12911876112567247	CASP3;SP3;KIT
cartilage development (GO:0051216)	1/75	0.9071796207189458	0.9783916728572931	5.9400831577066	-0.12976233801127512	SMAD9
nucleoside phosphate biosynthetic process (GO:1901293)	8/209	0.35032332198476246	0.8159963567622832	0.6471923952325337	-0.13160358922408433	RRM1;NME7;NPR2;CTPS2;ATP5H;HPRT1;GART;ATP5L
muscle cell development (GO:0055001)	1/75	0.9071796207189458	0.9783916728572931	6.0425274014697905	-0.1320002535814068	KDM1A
response to exogenous dsRNA (GO:0043330)	3/41	0.1522190616361561	0.6882528001482161	0.353402158098095	-0.13203071635153044	DHX36;MAPK1;SLC3A2
amide biosynthetic process (GO:0043604)	3/44	0.17472348149085087	0.7327391307223446	0.42579764590650926	-0.13240839192769505	GGCT;ASNSD1;ASNS
regulation of organ growth (GO:0046620)	1/74	0.9042227660411051	0.9778707085094767	5.9229512119733005	-0.13254272172453277	STK3
negative regulation of neuron differentiation (GO:0045665)	6/147	0.3303086527557561	0.8106726404691404	0.6332120138317946	-0.13290547467522287	CDK5;GDI1;DPYSL3;FKBP4;ISL1;PBX1
cilium assembly (GO:0042384)	2/118	0.8873243839355611	0.9724667616419225	4.761205641799035	-0.1329299206835171	PKHD1;SEPT2
single organismal cell-cell adhesion (GO:0016337)	9/235	0.3355350379316573	0.8142164231037827	0.6479031409975768	-0.13316293148972483	PKHD1;SHC1;GPR98;STXBP1;KIT;SCRIB;CTNNA2;S100A9;S100A8
protein autoubiquitination (GO:0051865)	3/41	0.1522190616361561	0.6882528001482161	0.35666999013930684	-0.13325157535148574	LRSAM1;STUB1;TRAF2
positive regulation of leukocyte differentiation (GO:1902107)	2/118	0.8873243839355611	0.9724667616419225	4.773897902619195	-0.13328428076603624	SART1;AP3D1
hormone transport (GO:0009914)	1/75	0.9071796207189458	0.9783916728572931	6.107451503727858	-0.13341853394527	VGF
negative regulation of hydrolase activity (GO:0051346)	8/354	0.8713869030619812	0.9672080700964375	4.001992464504424	-0.1334329758029331	FARP1;VTN;GPI;SERPINB12;FKBP15;TIPRL;ABCA7;PARK7
positive regulation of fibroblast proliferation (GO:0048146)	3/49	0.21404917009359978	0.7919746414988059	0.5755018362124847	-0.1342219371495059	CDK6;S100A6;MIF
positive regulation of adaptive immune response (GO:0002821)	1/74	0.9042227660411051	0.9778707085094767	6.014634217414065	-0.1345943872949732	TRAF2
positive regulation of myeloid cell differentiation (GO:0045639)	1/74	0.9042227660411051	0.9778707085094767	6.034065274652076	-0.13502921194912618	KDM1A
nitrogen compound transport (GO:0071705)	11/464	0.8682575595854624	0.9661163760720557	3.9478948139854615	-0.13608780278621338	NDC1;NXF1;RBFOX1;SEH1L;VGF;KIF5C;STXBP1;SLC3A2;PARK7;SUPT6H;CKAP5
visual behavior (GO:0007632)	3/49	0.21404917009359978	0.7919746414988059	0.5836117618814601	-0.1361133819111634	CDK5;KIT;DBH
extracellular matrix disassembly (GO:0022617)	2/116	0.8816079797780931	0.9714425007705915	4.700469820810603	-0.1361876425646196	CAPNS1;CASP3
sensory perception of pain (GO:0019233)	3/50	0.22213368865080715	0.7919746414988059	0.5846520863598311	-0.13635601253015495	CDK5;MAPK1;NIPSNAP1
response to monosaccharide (GO:0034284)	2/116	0.8816079797780931	0.9714425007705915	4.753012660527987	-0.1377099766604754	IRS2;GLUL
cellular response to glucagon stimulus (GO:0071377)	3/38	0.13073468305454283	0.6455024975818052	0.315781621780461	-0.1382258891683713	PRKAR2B;PRKAR2A;PRKACB
negative regulation of cell development (GO:0010721)	9/239	0.3528557116399	0.8159963567622832	0.6798758334960283	-0.13824961568444508	GDI1;DYNLT1;CDK5;NPR2;DPYSL3;ARHGEF2;FKBP4;ISL1;PBX1
negative regulation of protein polymerization (GO:0032272)	3/50	0.22213368865080715	0.7919746414988059	0.6021679696544008	-0.14044117028074424	MAPRE1;FKBP4;PFN2
response to drug (GO:0042493)	8/354	0.8713869030619812	0.9672080700964375	4.24888675743397	-0.14166483543449038	VAV3;PPP3CB;SRP72;DPYSL2;PDE4B;SRP54;ABAT;SRP68
membrane docking (GO:0022406)	3/45	0.18242284669082248	0.747565671453457	0.487395547209086	-0.14179950858302598	STXBP1;VPS33A;VPS33B
response to other organism (GO:0051707)	11/462	0.8648462222584364	0.9655312681169742	4.042740670538671	-0.14180637451687092	CDK6;SEH1L;VGF;PRKRA;DHX36;TRIM25;ZC3HAV1;ABCE1;S100A9;S100A8;TRIM56
synapse assembly (GO:0007416)	3/49	0.21404917009359978	0.7919746414988059	0.6081353228062666	-0.14183291162594983	FARP1;DBNL;CDK5
T cell activation (GO:0042110)	4/198	0.8718701735736825	0.9672080700964375	4.262063335278724	-0.14210416409598056	PPP3CB;CDK6;SP3;KIT
positive regulation of ERK1 and ERK2 cascade (GO:0070374)	2/115	0.8786504179329235	0.9704679234769479	4.779631474325914	-0.1432786707847707	ABCA7;MIF
DNA recombination (GO:0006310)	4/196	0.866906059224147	0.9660975048720509	4.159171628657284	-0.14345196372152072	RFC3;RAD50;RFC4;RPA1
response to acid chemical (GO:0001101)	6/275	0.8664553578418126	0.9659737505692337	4.156749152345749	-0.14390091294977309	TMED10;MAP7;ASNS;SCAMP3;MTOR;CPEB4
leukocyte homeostasis (GO:0001776)	3/51	0.23027798059391286	0.7919746414988059	0.6173486842932793	-0.14398170620597078	PPP3CB;CASP3;PDE4B
transcription-coupled nucleotide-excision repair (GO:0006283)	3/47	0.19808207195962932	0.7732397021436282	0.5599771831863819	-0.1440071959622996	RFC3;RFC4;RPA1
negative regulation of T cell activation (GO:0050868)	1/73	0.9011719337457125	0.9763554207896404	6.031219935387978	-0.14431863857607072	CASP3
positive regulation of transmembrane receptor protein serine/threonine kinase signaling pathway (GO:0090100)	1/73	0.9011719337457125	0.9763554207896404	6.065240088419624	-0.1451326931491545	DAB2
regulation of muscle contraction (GO:0006937)	2/114	0.8756248749401007	0.9695440026599299	4.703120101626417	-0.1454647692539596	PDE4B;SRI
regulation of BMP signaling pathway (GO:0030510)	1/73	0.9011719337457125	0.9763554207896404	6.089728177014922	-0.14571865878218795	SKOR2
nucleobase-containing compound transport (GO:0015931)	7/180	0.35164525522289297	0.8159963567622832	0.7171031117150977	-0.1458196110471267	NDC1;NXF1;RBFOX1;SEH1L;KIF5C;SUPT6H;CKAP5
fluid transport (GO:0042044)	3/46	0.19021103560734717	0.7502915190947231	0.5078031126536249	-0.14588851112397044	PRKAR2B;PRKAR2A;PRKACB
ncRNA metabolic process (GO:0034660)	12/332	0.36757660449822066	0.8159963567622832	0.7196080085898837	-0.14632897027598415	UTP15;QARS;LAS1L;LARS;INTS3;HEATR1;DIS3L;GAR1;IMP4;PA2G4;EEF1E1;EPRS
growth (GO:0040007)	12/329	0.35640680902347216	0.8159963567622832	0.7232039190038541	-0.14706018207713137	CYFIP1;EPB41L5;PPP3CB;CDK5;MAP1B;TBCE;DPYSL3;DCX;MAP7;SLC3A2;NDNF;MTOR
glycolytic process (GO:0006096)	3/44	0.17472348149085087	0.7327391307223446	0.4794984948183042	-0.14910750503440323	GPI;PPP2R5D;ENO2
regulation of mRNA stability (GO:0043488)	3/48	0.20603005565008414	0.785455064703538	0.6270930163138945	-0.15143796481974903	METTL14;YBX2;RBM10
hexose biosynthetic process (GO:0019319)	3/50	0.22213368865080715	0.7919746414988059	0.6506387370325606	-0.1517458089165411	GPI;ENO2;PRKACB
developmental maturation (GO:0021700)	3/154	0.8650399687630275	0.9655312681169742	4.333784517164137	-0.15201525905308885	HBZ;STXBP1;ARCN1
response to glucagon (GO:0033762)	3/49	0.21404917009359978	0.7919746414988059	0.6588083740026011	-0.15365117990048735	PRKAR2B;PRKAR2A;PRKACB
peptidyl-serine phosphorylation (GO:0018105)	4/84	0.28527848476824597	0.8069204675453048	0.7187357346660939	-0.15419049847799643	CDK5;DYRK1A;MAPK1;MTOR
positive regulation of developmental growth (GO:0048639)	1/71	0.8947763220742239	0.974058224724634	5.902835381744772	-0.1551512948101637	MAP1B
regulation of calcium ion transport into cytosol (GO:0010522)	1/72	0.8980241438916984	0.974058224724634	5.909068998160764	-0.1553151404192217	SRI
tissue remodeling (GO:0048771)	1/71	0.8947763220742239	0.974058224724634	5.911263667453068	-0.15537282554177045	DBH
negative regulation of purine nucleotide metabolic process (GO:1900543)	1/72	0.8980241438916984	0.974058224724634	5.934288911116337	-0.15597802560862709	ABCA7
regulation of heart rate (GO:0002027)	1/72	0.8980241438916984	0.974058224724634	5.989918331035795	-0.15744020030466124	SRI
actin-mediated cell contraction (GO:0070252)	3/46	0.19021103560734717	0.7502915190947231	0.5482125341175844	-0.15749787346511715	TMOD1;EPB41L5;PARD3
protein transmembrane transport (GO:0071806)	3/44	0.17472348149085087	0.7327391307223446	0.5103759234543743	-0.15870932108921038	C2CD5;TOMM70A;SRP54
regulation of multicellular organism growth (GO:0040014)	1/72	0.8980241438916984	0.974058224724634	6.042276091035586	-0.15881638204309323	SGPL1
pigment biosynthetic process (GO:0046148)	3/46	0.19021103560734717	0.7502915190947231	0.5530665881968695	-0.15889241143642174	AP3D1;HPRT1;GART
peptide transport (GO:0015833)	1/72	0.8980241438916984	0.974058224724634	6.062095858083537	-0.15933732872743334	VGF
monosaccharide transport (GO:0015749)	1/71	0.8947763220742239	0.974058224724634	6.090426438636186	-0.16008197532033355	SEH1L
gluconeogenesis (GO:0006094)	3/46	0.19021103560734717	0.7502915190947231	0.5577949210359933	-0.16025083051816705	GPI;ENO2;PRKACB
positive regulation of adaptive immune response based on somatic recombination of immune receptors built from immunoglobulin superfamily domains (GO:0002824)	1/71	0.8947763220742239	0.974058224724634	6.1074120376568075	-0.16052842817065796	TRAF2
cellular response to extracellular stimulus (GO:0031668)	5/119	0.3330482670978323	0.8106726404691404	0.7657979178155643	-0.1607340567603495	ASNS;GLUL;SQSTM1;MTOR;CPEB4
DNA modification (GO:0006304)	1/72	0.8980241438916984	0.974058224724634	6.126140884983361	-0.16102070090487702	CTCF
gonad development (GO:0008406)	2/112	0.8693645267876547	0.9661870708026924	4.684484858882523	-0.16113601283040463	RRM1;KIT
lipid biosynthetic process (GO:0008610)	12/491	0.8518097218668406	0.9594244946492256	3.9064578878506495	-0.16181196662009067	ARF3;VAC14;SGPL1;VAPB;RNPEP;TECR;MIF;ACBD3;LBR;PBX1;PIK3R6;AASDHPPT
body fluid secretion (GO:0007589)	1/71	0.8947763220742239	0.974058224724634	6.18656448196295	-0.16260888670071738	COPA
response to hexose (GO:0009746)	2/111	0.8661270236927057	0.9659737505692337	4.749954734375483	-0.1644368706639421	IRS2;GLUL
positive regulation of stress-activated MAPK cascade (GO:0032874)	5/118	0.32696433478173265	0.8106726404691404	0.7846881742084301	-0.164698950726018	DAB2;DBNL;DVL2;TRAF2;STK3
viral life cycle (GO:0019058)	5/118	0.32696433478173265	0.8106726404691404	0.7847269937119201	-0.16470709858870114	PDCD6IP;CHMP2A;VPS37B;VPS28;KPNA1
response to retinoic acid (GO:0032526)	2/111	0.8661270236927057	0.9659737505692337	4.781045126807361	-0.16551317709739366	MAP7;SCAMP3
BMP signaling pathway (GO:0030509)	1/70	0.8914252967613882	0.9735843102877834	6.183193713590446	-0.16552936744754496	SMAD9
protein lipidation (GO:0006497)	1/70	0.8914252967613882	0.9735843102877834	6.1977745544381175	-0.16591970898852945	PPM1B
regulation of cell activation (GO:0050865)	10/420	0.8553138717765909	0.9607718123780218	4.156574240450703	-0.16633922739638127	VAV3;SART1;HSPH1;CASP3;AP3D1;TRAF2;IRS2;MIF;SUPT6H;MTOR
purine ribonucleoside triphosphate biosynthetic process (GO:0009206)	3/52	0.23847651625591904	0.7919746414988059	0.7144836681909815	-0.1666361008288264	NME7;ATP5H;ATP5L
hormone secretion (GO:0046879)	1/70	0.8914252967613882	0.9735843102877834	6.229336687539223	-0.16676465420123368	VGF
regulation of RNA stability (GO:0043487)	3/51	0.23027798059391286	0.7919746414988059	0.7150762954589529	-0.16677431686031335	METTL14;YBX2;RBM10
positive regulation of stress-activated protein kinase signaling cascade (GO:0070304)	5/119	0.3330482670978323	0.8106726404691404	0.7954157928492932	-0.1669505808537708	DAB2;DBNL;DVL2;TRAF2;STK3
nucleoside biosynthetic process (GO:0009163)	5/119	0.3330482670978323	0.8106726404691404	0.7972615027740898	-0.16733797867363123	NME7;CTPS2;ATP5H;HPRT1;ATP5L
regulation of MAP kinase activity (GO:0043405)	10/273	0.37103565979925107	0.8159963567622832	0.8309721248412605	-0.1689743497912727	DAB2;DBNL;SHC1;MAGED1;KIT;DVL2;MAPK1;TRAF2;MIF;PIK3R6
hair cycle process (GO:0022405)	1/69	0.8879677959682153	0.9724667616419225	6.092492445195355	-0.1700986259435609	LDB1
molting cycle process (GO:0022404)	1/69	0.8879677959682153	0.9724667616419225	6.099024373594346	-0.1702809933499097	LDB1
nuclear export (GO:0051168)	2/110	0.8628161443726189	0.9649426325582887	4.778983265424277	-0.17054579579582121	NXF1;XPO5
mRNA export from nucleus (GO:0006406)	1/69	0.8879677959682153	0.9724667616419225	6.12750469912846	-0.17107614644748942	NXF1
nuclear envelope organization (GO:0006998)	3/52	0.23847651625591904	0.7919746414988059	0.7338972112389921	-0.17116384199467252	SEH1L;PPP2R2A;EMD
negative regulation of epithelial cell proliferation (GO:0050680)	2/110	0.8628161443726189	0.9649426325582887	4.803665536155855	-0.17142662279817128	CDK6;MAGED1
action potential (GO:0001508)	1/69	0.8879677959682153	0.9724667616419225	6.163611354359848	-0.1720842219596914	SRI
cell projection assembly (GO:0030031)	8/213	0.36894164166823057	0.8159963567622832	0.8462676662903268	-0.17208462761383525	PKHD1;VAV3;CYFIP1;MYO1A;KIT;ARFIP2;ARHGEF7;SEPT2
positive regulation of cytokine secretion (GO:0050715)	1/69	0.8879677959682153	0.9724667616419225	6.1822331995974835	-0.1726041323766429	MIF
hexose transport (GO:0008645)	1/69	0.8879677959682153	0.9724667616419225	6.18408789932534	-0.17265591444745945	SEH1L
positive regulation of lymphocyte mediated immunity (GO:0002708)	1/69	0.8879677959682153	0.9724667616419225	6.18815355526813	-0.17276942505016413	TRAF2
glucose transport (GO:0015758)	1/68	0.8844004443539968	0.9724667616419225	6.204847609901317	-0.1732355127441704	SEH1L
secretion by cell (GO:0032940)	10/415	0.8456239749205504	0.9571240484553697	3.9602341526055027	-0.17354646502680227	NSF;PPP3CB;TMED10;TXLNA;CDK5;VGF;STXBP1;KIT;ABAT;PRSS12
lymphocyte activation (GO:0046649)	7/304	0.845957791088185	0.9571240484553697	3.9834352054370457	-0.17456318791455508	PPP3CB;CDK6;TXLNA;SP3;KIT;PFDN1;HPRT1
regulation of I-kappaB kinase/NF-kappaB signaling (GO:0043122)	8/213	0.36894164166823057	0.8159963567622832	0.8642701704832317	-0.17574535382795692	RNF31;PPM1B;TFG;TRIM25;ZC3HAV1;UACA;SQSTM1;TMED4
cellular process involved in reproduction in multicellular organism (GO:0022412)	5/228	0.8471136140352369	0.9571677069194333	4.021071953092879	-0.17602910190659884	KIT;MAP7;YBX2;MTOR;SRPK1
regulation of actin polymerization or depolymerization (GO:0008064)	5/122	0.35135487917195346	0.8159963567622832	0.8860240908969841	-0.18016891323198275	ARPC1B;WASH1;ARPC5;MTOR;PFN2
macromolecule glycosylation (GO:0043413)	6/264	0.8408063513821998	0.9542664926667054	3.861352355998037	-0.180758800821797	ARF4;LMAN1;COG7;COG2;STT3A;MOGS
protein glycosylation (GO:0006486)	6/264	0.8408063513821998	0.9542664926667054	3.863669661933814	-0.18086727925201265	ARF4;LMAN1;COG7;COG2;STT3A;MOGS
reproductive structure development (GO:0048608)	6/265	0.8432919458471051	0.9555068900355247	3.9743515641628764	-0.18088587255730015	CUL7;RRM1;VGF;KIT;MAPK1;FKBP4
negative regulation of cellular component movement (GO:0051271)	7/183	0.3667110267092789	0.8159963567622832	0.890472614147059	-0.18107349992176655	RNF20;PKHD1;OSBPL8;STK24;DPYSL3;PTPN23;PFN2
cellular iron ion homeostasis (GO:0006879)	1/67	0.8807197597010554	0.9714425007705915	6.250744651574778	-0.1811040621093851	ATP6V1H
translation (GO:0006412)	6/264	0.8408063513821998	0.9542664926667054	3.8837666858814845	-0.18180806724905338	SRP72;SSR4;RPL36AL;SRP54;MRPL15;SRP68
regulation of Wnt signaling pathway (GO:0030111)	8/214	0.3736105282098912	0.8159963567622832	0.8973242841291933	-0.1824667554180766	DAB2;DVL2;CSNK1D;ISL1;EMD;PFDN5;SCYL2;STK3
nucleoside monophosphate biosynthetic process (GO:0009124)	4/85	0.29218462288926283	0.8069204675453048	0.8518109369540566	-0.182739144087462	ATP5H;HPRT1;GART;ATP5L
peptidyl-tyrosine phosphorylation (GO:0018108)	6/152	0.3576635417513064	0.8159963567622832	0.8992022403094188	-0.18284862914765654	ABI2;SHC1;KIT;DYRK1A;CLK3;SCYL1
DNA integrity checkpoint (GO:0031570)	4/86	0.2991127708828588	0.8095203073887572	0.8815372451689591	-0.1862806499959773	BABAM1;BRE;TIPRL;BRCC3
glycosyl compound biosynthetic process (GO:1901659)	5/120	0.3391424143542776	0.8159963567622832	0.9178119975485186	-0.1866328374685446	NME7;CTPS2;ATP5H;HPRT1;ATP5L
regulation of neuron projection development (GO:0010975)	10/275	0.3792960197906933	0.8160154184847576	0.9209882039678958	-0.1872571903108758	CUL7;SKOR2;GDI1;STK24;CDK5;MAP1B;DPYSL3;NDNF;FKBP4;PDLIM5
regulation of phosphatidylinositol 3-kinase signaling (GO:0014066)	1/66	0.8769221497690042	0.9696604175517294	6.087196555754289	-0.18754259219627548	KIT
response to temperature stimulus (GO:0009266)	5/122	0.35135487917195346	0.8159963567622832	0.9268896920018617	-0.1884787447763866	VGF;PDCD6;FAM175B;DNAJA2;IMMT
immune response-regulating cell surface receptor signaling pathway (GO:0002768)	15/444	0.44022460050457246	0.8426322540187647	1.1038470011358847	-0.18900581753966167	RNF31;VAV3;MYO10;SHC1;BRK1;IRS2;ARPC5;MTOR;IGHG3;TNRC6C;ENAH;PPP3CB;KIT;PDE4B;MAPK1
regulation of acute inflammatory response (GO:0002673)	1/66	0.8769221497690042	0.9696604175517294	6.175291180848009	-0.19025673066663873	VTN
defense response to virus (GO:0051607)	3/147	0.8438065914460804	0.9557092576952022	4.217669819550371	-0.19106692089456248	TRIM25;ZC3HAV1;TRIM56
response to type I interferon (GO:0034340)	1/66	0.8769221497690042	0.9696604175517294	6.222785336816928	-0.19171999492022443	TRIM56
peptidyl-tyrosine modification (GO:0018212)	6/154	0.36865363943445423	0.8159963567622832	0.9469048929473821	-0.1925487435941653	ABI2;SHC1;KIT;DYRK1A;CLK3;SCYL1
regulation of transmembrane receptor protein serine/threonine kinase signaling pathway (GO:0090092)	4/186	0.8395538408140443	0.9542664926667054	4.133497676723981	-0.1934985503417473	DAB2;SKOR2;FAM89B;STUB1
cholesterol metabolic process (GO:0008203)	2/107	0.8524293227585146	0.9597422778801328	4.738401185603478	-0.19470323176311102	HDLBP;LBR
Fc receptor signaling pathway (GO:0038093)	12/352	0.4427865659928027	0.8426322540187647	1.1379620978226888	-0.1948471630640857	IGHG3;TNRC6C;VAV3;PPP3CB;MYO10;SHC1;KIT;BRK1;MAPK1;IRS2;ARPC5;MTOR
GTP metabolic process (GO:0046039)	6/258	0.8252197677729007	0.9490904995090851	3.7593516807280722	-0.19643034291853195	ARF3;NME7;SRP54;DNM1L;GNL1;DNM2
regulation of cytokine production (GO:0001817)	12/482	0.8350342488507175	0.9526022477863781	4.046015991778382	-0.19646576069210808	TIA1;PPM1B;DHX36;PDE4B;TRIM25;TRAF2;PARK7;ZC3HAV1;MIF;ARHGEF2;ISL1;TRIM56
regulation of cell adhesion (GO:0030155)	12/336	0.38254143253418976	0.8160154184847576	0.9664796833501613	-0.19650661020084553	VAV3;EPB41L5;VTN;DAB2;PPP1R12A;CDK6;MYO10;LDB1;EMILIN1;NDNF;PTPN23;ARHGEF7
negative regulation of ossification (GO:0030279)	1/65	0.8730039085575088	0.9672080700964375	5.922032998905103	-0.1974502682990253	CDK6
response to insulin (GO:0032868)	9/246	0.3834278673144388	0.8160154184847576	0.9861573182618127	-0.20050750685689814	EPM2AIP1;C2CD5;VGF;SHC1;MAPK1;ATP6V1H;IRS2;SOGA1;MTOR
regulation of actin filament length (GO:0030832)	5/123	0.35747000866592316	0.8159963567622832	0.9886244452221267	-0.20103222217120498	ARPC1B;WASH1;ARPC5;MTOR;PFN2
positive regulation of cell morphogenesis involved in differentiation (GO:0010770)	5/123	0.35747000866592316	0.8159963567622832	0.9968007264646357	-0.20269483125923843	EPB41L5;DAB2;CUL7;MAP1B;ARHGEF7
lipid oxidation (GO:0034440)	1/65	0.8730039085575088	0.9672080700964375	6.111516979861985	-0.20376797420934714	ABCD3
sulfur compound biosynthetic process (GO:0044272)	3/145	0.8372310524121969	0.9527028784688462	4.207846290061442	-0.20387940536077048	GGCT;CBS;TECR
negative regulation of lipid metabolic process (GO:0045833)	1/65	0.8730039085575088	0.9672080700964375	6.124595909399003	-0.2042040471165102	CRTC3
skeletal system morphogenesis (GO:0048705)	2/106	0.8488109446723902	0.9579437804159833	4.755282023744724	-0.20431633695034887	SGPL1;PRKRA
regulation of cell morphogenesis involved in differentiation (GO:0010769)	9/248	0.39220137445390485	0.8160154184847576	1.0122724620863028	-0.20581729088678014	EPB41L5;DAB2;CUL7;SKOR2;GDI1;CDK5;MAP1B;ARHGEF7;PDLIM5
response to glucose (GO:0009749)	2/106	0.8488109446723902	0.9579437804159833	4.796931793701505	-0.2061058687572748	IRS2;GLUL
negative regulation of protein phosphorylation (GO:0001933)	6/260	0.8305449139044796	0.9498718002892311	4.012777296813209	-0.20637011625272791	PRKAR2B;CASP3;PARD3;PKIA;PRKAR2A;PARK7
response to inorganic substance (GO:0010035)	9/370	0.8276429910399502	0.9494128832982277	3.9858464536932003	-0.20691128021794405	GDI1;PDCD6;ANXA7;ABAT;TRAF2;PARK7;GART;S100A9;S100A8
positive regulation of viral transcription (GO:0050434)	3/54	0.25501473306199396	0.7919746414988059	0.8881531404882532	-0.20714032084814488	TCEB2;TCEB1;NELFA
regulation of T cell activation (GO:0050863)	6/259	0.8278987168001423	0.9494128832982277	3.995969335169105	-0.20743677421025106	SART1;HSPH1;CASP3;AP3D1;TRAF2;MTOR
behavior (GO:0007610)	17/494	0.40274261305385123	0.8246947149539122	1.0782278221496524	-0.20781979078936036	TMOD1;GIT2;GPI;ABCA7;ABAT;PARK7;DBH;ARCN1;PPP3CB;CDK5;ABI2;PRKAR2B;KIT;TBCE;ANXA7;STRN;HPRT1
negative regulation of NF-kappaB transcription factor activity (GO:0032088)	1/65	0.8730039085575088	0.9672080700964375	6.267517128234506	-0.20896927436362472	PKHD1
adult locomotory behavior (GO:0008344)	4/88	0.3130245835135705	0.8095203073887572	0.9891616007585174	-0.20902312063404835	TMOD1;TBCE;PARK7;ARCN1
membrane depolarization (GO:0051899)	2/106	0.8488109446723902	0.9579437804159833	4.871609720673878	-0.2093144945367455	CDK5;PARK7
response to oxygen levels (GO:0070482)	6/259	0.8278987168001423	0.9494128832982277	4.038963936779031	-0.2096686886015662	SMAD9;TCEB2;TCEB1;ABAT;MTOR;CPEB4
positive regulation of epithelial cell proliferation (GO:0050679)	3/144	0.8338547968228135	0.9516384599374325	4.268168457551968	-0.21157347449238476	PDCD6;GLUL;MTOR
fatty acid oxidation (GO:0019395)	1/64	0.8689612130774679	0.9661163760720557	6.1389925331497315	-0.21161708822579428	ABCD3
positive regulation of DNA metabolic process (GO:0051054)	5/124	0.3635889784956212	0.8159963567622832	1.0430675296555274	-0.21210297234170272	BABAM1;BRE;SHC1;DHX36;BRCC3
fatty acid catabolic process (GO:0009062)	1/64	0.8689612130774679	0.9661163760720557	6.154187897000445	-0.21214088730768854	ABCD3
carbohydrate homeostasis (GO:0033500)	3/143	0.8304185762621645	0.9498718002892311	4.14290522933849	-0.2130623681711925	VGF;IRS2;DBH
regulation of dendrite development (GO:0050773)	4/89	0.32000308777156966	0.8106726404691404	1.015538960983725	-0.2131524429613523	CUL7;SKOR2;CDK5;PDLIM5
glucose homeostasis (GO:0042593)	3/143	0.8304185762621645	0.9498718002892311	4.1456223600014654	-0.213202105447726	VGF;IRS2;DBH
regulation of neurotransmitter levels (GO:0001505)	4/90	0.32699328410963835	0.8106726404691404	1.017309466345644	-0.21352405602364546	STXBP1;ABAT;PARK7;GLUL
regulation of small GTPase mediated signal transduction (GO:0051056)	6/256	0.8197628106550082	0.9457989781184265	3.8414505343138994	-0.21406571154060686	VAV3;GDI1;CUL3;ARHGEF2;ARHGEF7;SQSTM1
pyrimidine nucleoside metabolic process (GO:0006213)	3/54	0.25501473306199396	0.7919746414988059	0.9191850613121086	-0.2143777686968953	NT5C3A;NME7;CTPS2
cofactor metabolic process (GO:0051186)	6/255	0.8169844111180565	0.9445136850486799	3.764600633422619	-0.21490261471064623	TECR;SUCLG1;TKT;GART;GPHN;AASDHPPT
brain development (GO:0007420)	7/187	0.3868633926819995	0.8160154184847576	1.0581923902063728	-0.21515382384344048	ARF4;QARS;NME7;DCX;IRS2;NES;PAFAH1B2
oxidoreduction coenzyme metabolic process (GO:0006733)	1/65	0.8730039085575088	0.9672080700964375	6.453995033196027	-0.21518675278248864	TKT
synaptic transmission (GO:0007268)	11/434	0.8094858555340737	0.9434338115766332	3.6969033931924664	-0.21526724146111773	NSF;CDK5;STXBP1;AKAP9;KIF5A;MAPK1;ABAT;KIF1B;DBH;GLUL;PRKACB
response to toxic substance (GO:0009636)	3/142	0.8269216637959377	0.9494128832982277	4.149814650179966	-0.21542311574504225	EPHX2;MAPK1;ASNS
spermatogenesis (GO:0007283)	12/353	0.4465517914369777	0.8426322540187647	1.2602954789197303	-0.2157936535494922	NDC1;SGPL1;SPATA16;AKAP9;KIT;MAP7;YBX2;SBF1;SPATA5;DPCD;PAFAH1B2;WDR33
modification of morphology or physiology of other organism involved in symbiotic interaction (GO:0051817)	1/63	0.8647901192777222	0.9655312681169742	6.190869177919202	-0.21715583184117215	VAPB
negative regulation of apoptotic signaling pathway (GO:2001234)	7/187	0.3868633926819995	0.8160154184847576	1.0704357704687002	-0.21764317276012973	DAB2;CTTN;KDM1A;FIGNL1;PARK7;MIF;ARHGEF2
positive regulation of neuron death (GO:1901216)	3/55	0.263343899688397	0.7919746414988059	0.9336465782490326	-0.21775056908649762	SRPK2;CDK5;CASP3
purine nucleoside triphosphate biosynthetic process (GO:0009145)	3/53	0.24672387173560667	0.7919746414988059	0.9349943397701763	-0.21806490198832468	NME7;ATP5H;ATP5L
protein tetramerization (GO:0051262)	4/89	0.32000308777156966	0.8106726404691404	1.0409658309650913	-0.21848931299944407	RRM1;CRTC3;HPRT1;DNM1L
regulation of tube size (GO:0035150)	1/64	0.8689612130774679	0.9661163760720557	6.355127591699736	-0.21906747548508562	RAP1GDS1
cell redox homeostasis (GO:0045454)	1/63	0.8647901192777222	0.9655312681169742	6.247374417905092	-0.21913785440373665	TXNDC5
protein homotetramerization (GO:0051289)	3/54	0.25501473306199396	0.7919746414988059	0.9408449575813291	-0.21942941762793142	CRTC3;HPRT1;DNM1L
cell cycle checkpoint (GO:0000075)	6/156	0.37965758881185685	0.8160154184847576	1.0810193820570935	-0.21979505414237296	BABAM1;BRE;INTS3;CSNK2A2;TIPRL;BRCC3
protein polymerization (GO:0051258)	1/64	0.8689612130774679	0.9661163760720557	6.38673702183247	-0.22015708351588967	DNM1L
cellular response to nitrogen compound (GO:1901699)	15/438	0.4200729356106296	0.8331153618386544	1.2194592686920371	-0.2226527228690893	C2CD5;SHC1;IRS2;TRAF2;SOGA1;MTOR;PRKRA;PRKAR2B;PRKAR2A;PDE4B;ATP6V1H;MAPK1;ARHGEF2;PRKACB;CPEB4
alcohol biosynthetic process (GO:0046165)	2/104	0.8413314227478061	0.9542664926667054	4.762136368475519	-0.22292657596460477	PARK7;LBR
divalent inorganic cation homeostasis (GO:0072507)	7/291	0.813815338161748	0.9434338115766332	3.8422706468857633	-0.22373184125535564	PKHD1;VAPB;EPHX2;RAP1GDS1;ANXA7;IMMT;CHERP
regulation of blood vessel size (GO:0050880)	1/63	0.8647901192777222	0.9655312681169742	6.3802422755918435	-0.22379843264109148	RAP1GDS1
ceramide metabolic process (GO:0006672)	1/64	0.8689612130774679	0.9661163760720557	6.49947737991872	-0.22404335413357113	SGPL1
defense response to bacterium (GO:0042742)	4/179	0.8177250489962007	0.9449857941264506	3.962143772293874	-0.22419942789540256	SEH1L;VGF;S100A9;S100A8
mRNA splicing, via spliceosome (GO:0000398)	4/177	0.8110575601899563	0.9434338115766332	3.8661463649146586	-0.22512210207944103	SART1;RBM17;PPIH;PLRG1
RNA splicing, via transesterification reactions with bulged adenosine as nucleophile (GO:0000377)	4/177	0.8110575601899563	0.9434338115766332	3.8689166856127666	-0.22528341527354356	SART1;RBM17;PPIH;PLRG1
response to metal ion (GO:0010038)	6/255	0.8169844111180565	0.9445136850486799	3.975221091656886	-0.2269259052515468	GDI1;PDCD6;ANXA7;ABAT;S100A9;S100A8
monosaccharide metabolic process (GO:0005996)	8/221	0.40637572219323576	0.8246947149539122	1.1783372198844646	-0.22711507668897604	GPI;PYGB;AGL;IRS2;PPP2R5D;TKT;ENO2;PRKACB
male gamete generation (GO:0048232)	12/354	0.4503149868566255	0.8455245664600445	1.355944318700928	-0.22752482007744565	NDC1;SGPL1;SPATA16;AKAP9;KIT;MAP7;YBX2;SBF1;SPATA5;DPCD;PAFAH1B2;WDR33
negative regulation of catabolic process (GO:0009895)	7/190	0.40199624322665717	0.8246947149539122	1.185674727759314	-0.22852932265827997	SERPINB12;CRTC3;UBXN1;HERC1;ABCA7;PARK7;MTOR
cellular amide metabolic process (GO:0043603)	4/177	0.8110575601899563	0.9434338115766332	3.9284544192708095	-0.22875024205376565	GGCT;ASNSD1;ASNS;AASDHPPT
response to mechanical stimulus (GO:0009612)	4/176	0.807649964262807	0.9434338115766332	3.9443842943290957	-0.22967782384206234	STRC;GPR98;KIT;ASNS
mitotic cell cycle checkpoint (GO:0007093)	2/103	0.8374673685555961	0.9527028784688462	4.753225865961718	-0.2303042450449296	INTS3;CSNK2A2
regulation of heart contraction (GO:0008016)	3/140	0.8197428738996165	0.9457989781184265	4.14047938711252	-0.2307291629045435	CELF2;PDE4B;SRI
response to peptide (GO:1901652)	13/384	0.44678065015260215	0.8426322540187647	1.351633818867599	-0.2314330289310423	C2CD5;SHC1;IRS2;SOGA1;MTOR;EPM2AIP1;VGF;PRKAR2B;PRKAR2A;MAPK1;ATP6V1H;ARHGEF2;PRKACB
multi-organism reproductive process (GO:0044703)	3/140	0.8197428738996165	0.9457989781184265	4.159126603613306	-0.23176828331826124	VGF;ABAT;DBH
kidney epithelium development (GO:0072073)	1/62	0.8604865585234441	0.9630947549943625	6.167396280725214	-0.23191554044093504	SMAD9
cellular response to hydrogen peroxide (GO:0070301)	1/62	0.8604865585234441	0.9630947549943625	6.222433896134059	-0.23398514611262083	PARK7
positive regulation of GTPase activity (GO:0043547)	16/482	0.46313828606898555	0.8455245664600445	1.3965002420842902	-0.23433002516117257	VAV3;GIT2;FARP1;RANBP1;DOCK4;GDI1;RAP1GDS1;DOCK7;SCRIB;HERC1;TBC1D5;SNX9;ARHGEF2;SBF1;ARHGEF7;GIT1
positive regulation of Ras GTPase activity (GO:0032320)	10/292	0.4497863772633794	0.8455245664600445	1.4005150940319309	-0.23500370951120525	VAV3;FARP1;DOCK4;TBC1D5;DOCK7;RAP1GDS1;SCRIB;ARHGEF2;SBF1;ARHGEF7
regulation of leukocyte proliferation (GO:0070663)	4/176	0.807649964262807	0.9434338115766332	4.044142723256634	-0.23548666424813572	VAV3;CASP3;IRS2;MIF
regulation of homeostatic process (GO:0032844)	11/314	0.4146309247200784	0.8254075243338662	1.2274354778307168	-0.23551792073403233	PPP3CB;CDK6;LDB1;KDM1A;FHL1;DHX36;AP3D1;YLPM1;SRI;MIF;CHERP
peptidyl-proline modification (GO:0018208)	3/55	0.263343899688397	0.7919746414988059	1.012016021820643	-0.23602835356541055	FKBP15;PPIH;FKBP4
axon ensheathment (GO:0008366)	1/62	0.8604865585234441	0.9630947549943625	6.289002065859275	-0.23648834071132627	PARD3
hemostasis (GO:0007599)	16/478	0.4501567018490757	0.8455245664600445	1.4096859536229536	-0.23654256191806664	VAV3;GPI;KDM1A;SHC1;SLC3A2;PIK3R6;LMAN1;CDK5;KIF2A;PRKAR2B;PRKAR2A;KIF5A;ANXA7;MAPK1;KIF3C;PRKACB
cell aging (GO:0007569)	1/62	0.8604865585234441	0.9630947549943625	6.2917460228502895	-0.2365915230332579	MIF
ensheathment of neurons (GO:0007272)	1/62	0.8604865585234441	0.9630947549943625	6.292715426662519	-0.23662797598662516	PARD3
sterol homeostasis (GO:0055092)	1/62	0.8604865585234441	0.9630947549943625	6.296963283397618	-0.23678771016707909	EPHX2
guanosine-containing compound catabolic process (GO:1901069)	6/246	0.7904486383379191	0.9362915149658652	3.597069261483138	-0.23678932633496	ARF3;SRP54;HPRT1;DNM1L;GNL1;DNM2
sensory organ development (GO:0007423)	2/103	0.8374673685555961	0.9527028784688462	4.902721447633012	-0.2375476347018177	ABI2;NES
organic hydroxy compound transport (GO:0015850)	2/102	0.8335184946638705	0.9516365310413679	4.798154648855696	-0.23785466069095484	ABCA7;PARK7
cellular response to insulin stimulus (GO:0032869)	7/195	0.42718701618464106	0.8373355170710431	1.3426605967407963	-0.23836311590108797	C2CD5;SHC1;MAPK1;ATP6V1H;IRS2;SOGA1;MTOR
antigen receptor-mediated signaling pathway (GO:0050851)	5/127	0.3819536257689122	0.8160154184847576	1.1807036253279362	-0.24006305674299533	ENAH;VAV3;RNF31;PDE4B;MAPK1
regulation of ion transmembrane transporter activity (GO:0032412)	3/137	0.8085015691011928	0.9434338115766332	4.124762644836175	-0.24018108719605394	FHL1;PDE4B;SRI
negative regulation of Wnt signaling pathway (GO:0030178)	5/126	0.3758322950109065	0.8160154184847576	1.1824428691958229	-0.24041668333513053	DAB2;ISL1;PFDN5;SCYL2;STK3
negative regulation of response to wounding (GO:1903035)	3/138	0.8123126957949149	0.9434338115766332	4.1668012261247505	-0.24262895463170142	VTN;ISL1;UACA
regulation of nuclear division (GO:0051783)	3/138	0.8123126957949149	0.9434338115766332	4.177116811702852	-0.24322962157245598	RANBP1;CUL7;CUL3
positive regulation of GTP catabolic process (GO:0033126)	16/483	0.4663796509646433	0.8466136674986534	1.4670534083766344	-0.24428024699884476	VAV3;GIT2;FARP1;RANBP1;DOCK4;GDI1;RAP1GDS1;DOCK7;SCRIB;HERC1;TBC1D5;SNX9;ARHGEF2;SBF1;ARHGEF7;GIT1
positive regulation of B cell activation (GO:0050871)	3/58	0.28851099054029516	0.8069204675453048	1.1400845616668362	-0.24458253345667466	VAV3;IRS2;MIF
negative regulation of neuron projection development (GO:0010977)	4/91	0.33399269494232253	0.8111658620119259	1.1687053418895723	-0.24458984492455282	CDK5;GDI1;DPYSL3;FKBP4
lymphocyte differentiation (GO:0030098)	4/172	0.7935181257396029	0.9387543883541726	3.8871041072441486	-0.24567042633000669	PPP3CB;CDK6;SP3;KIT
gamete generation (GO:0007276)	13/390	0.46841292373802246	0.8474340681367277	1.4907141536566633	-0.24677615790427984	NDC1;YBX2;DYNLL1;SPATA5;DPCD;WDR33;SGPL1;SPATA16;AKAP9;KIT;MAP7;SBF1;PAFAH1B2
negative regulation of cell migration (GO:0030336)	6/166	0.43458283605422793	0.8426322540187647	1.441815182587457	-0.2468743014617226	RNF20;OSBPL8;STK24;DPYSL3;PTPN23;PFN2
cell fate specification (GO:0001708)	1/61	0.8560463335323162	0.9607718123780218	6.178801929856805	-0.2472654353783916	ISL1
regulation of synaptic transmission (GO:0050804)	6/245	0.7873271871730606	0.9362915149658652	3.7597193099073336	-0.2474963193325966	PPP3CB;CDK5;STXBP1;KIT;GLUL;PFN2
gene silencing (GO:0016458)	1/62	0.8604865585234441	0.9630947549943625	6.584781768800353	-0.24761068578803555	XPO5
lipid modification (GO:0030258)	3/134	0.7966757216389484	0.9391705685044639	3.9522420019210545	-0.24803546425498568	ABCD3;EPHX2;PIK3R6
response to decreased oxygen levels (GO:0036293)	6/245	0.7873271871730606	0.9362915149658652	3.8060949063092187	-0.25054915079958273	SMAD9;TCEB2;TCEB1;ABAT;MTOR;CPEB4
regulation of leukocyte activation (GO:0002694)	10/390	0.7895094688388767	0.9362915149658652	3.811462964869621	-0.2509025215238707	VAV3;SART1;HSPH1;CASP3;AP3D1;IRS2;TRAF2;MIF;SUPT6H;MTOR
glial cell differentiation (GO:0010001)	1/61	0.8560463335323162	0.9607718123780218	6.300142181997891	-0.2521212716092974	CDK5
cholesterol homeostasis (GO:0042632)	1/61	0.8560463335323162	0.9607718123780218	6.303922533917497	-0.2522725550415706	EPHX2
fertilization (GO:0009566)	2/100	0.8253603593606172	0.9490904995090851	4.841320571024241	-0.2529644312927537	MAP7;PARK7
liposaccharide metabolic process (GO:1903509)	2/100	0.8253603593606172	0.9490904995090851	4.872247833554117	-0.25458041545710264	KIT;MAP7
sensory perception of smell (GO:0007608)	1/61	0.8560463335323162	0.9607718123780218	6.363583180655257	-0.25466007546349656	OBP2A
secretion by tissue (GO:0032941)	1/61	0.8560463335323162	0.9607718123780218	6.364383848528544	-0.25469211686772497	COPA
cellular amino acid metabolic process (GO:0006520)	14/421	0.4677341124629595	0.8467446313460578	1.5322539200804504	-0.25489982866007577	ASNSD1;CKMT1A;ASNS;CTPS2;ABAT;EPRS;GGCT;QARS;CBS;LARS;EEF1E1;GART;GLUL;AASDHPPT
ribonucleoprotein complex biogenesis (GO:0022613)	1/61	0.8560463335323162	0.9607718123780218	6.375949290790599	-0.2551549467413372	GNL1
homotypic cell-cell adhesion (GO:0034109)	3/57	0.2800969323494343	0.8069204675453048	1.1895613459661247	-0.25519679634390924	STXBP1;S100A9;S100A8
cellular component disassembly (GO:0022411)	9/350	0.7778118263397671	0.9306255086707184	3.571975260711505	-0.25681905230869834	DBNL;SEH1L;KIF2A;CAPNS1;STK24;CASP3;DNM1L;EMD;KPNA1
regulation of developmental growth (GO:0048638)	3/133	0.7926006879452714	0.938059241163692	4.023063299676848	-0.2572434178630241	CDK5;CARM1;MAP1B
cellular defense response (GO:0006968)	1/60	0.8514651142632723	0.95941631733944	6.21891839717287	-0.2576509222837356	LGALS3BP
activation of MAPKK activity (GO:0000186)	1/60	0.8514651142632723	0.95941631733944	6.238002822162809	-0.2584415934882569	MAPK1
protein targeting (GO:0006605)	7/273	0.7611060685031407	0.926639167496619	3.399728428007516	-0.25902883366377527	SRP72;SSR4;PARD3;TOMM70A;SRP54;HOMER3;SRP68
positive regulation of DNA replication (GO:0045740)	1/60	0.8514651142632723	0.95941631733944	6.2521940911484455	-0.2590295403479855	SHC1
exocytosis (GO:0006887)	8/233	0.4623821576727106	0.8455245664600445	1.5476630439043033	-0.2596948493741991	NSF;PPP3CB;TMED10;TXLNA;CDK5;STXBP1;KIT;PRSS12
pattern specification process (GO:0007389)	10/385	0.7766943386046299	0.9298533798799762	3.5848935253865677	-0.2607234315610525	EPB41L5;RBM15;LDB1;NME7;DVL2;DPCD;ISL1;SSBP3;PBX1;RNF2
embryo development (GO:0009790)	7/276	0.7705756472947277	0.9293965822333357	3.5619994936827823	-0.2608086758403216	EPB41L5;DAB2;KDM1A;CDK5;PRMT1;RPA1;BRK1
positive regulation of cellular carbohydrate metabolic process (GO:0010676)	3/56	0.2717062876709083	0.7974537483344307	1.1540973338153073	-0.2612085135674861	EPM2AIP1;WDR5;IRS2
Notch signaling pathway (GO:0007219)	5/131	0.4064026723703626	0.8246947149539122	1.3562221466622326	-0.26140097388817246	TNRC6C;CDK6;TBL1XR1;TBL1X;SKP1
regulation of mononuclear cell proliferation (GO:0032944)	4/171	0.7898579299943889	0.9362915149658652	3.9788431951780496	-0.261920894842649	VAV3;CASP3;IRS2;MIF
protein oligomerization (GO:0051259)	12/366	0.4951986544237367	0.8557884893599552	1.68403114025341	-0.26225758004197464	RRM1;TMED10;CRTC3;ST13;DPYSL3;BRK1;TRAF2;MIF;HPRT1;DNM1L;SQSTM1;GLUL
regulation of stress fiber assembly (GO:0051492)	3/56	0.2717062876709083	0.7974537483344307	1.1604338440846143	-0.26264266507287	SYNPO;MTOR;PFN2
positive regulation of immune effector process (GO:0002699)	3/133	0.7926006879452714	0.938059241163692	4.115334865939212	-0.26314346250781295	TRAF2;MIF;ZC3HAV1
regulation of lymphocyte proliferation (GO:0050670)	4/170	0.786146121755495	0.935872570227136	3.975281932098385	-0.26346560522190504	VAV3;CASP3;IRS2;MIF
carbohydrate derivative biosynthetic process (GO:1901137)	10/377	0.7550599553243826	0.9245913152026607	3.368123590408226	-0.2640725448934146	RRM1;NME7;NPR2;CTPS2;HPRT1;ATP5H;TKT;GART;GNE;ATP5L
response to peptide hormone (GO:0043434)	12/364	0.48776468992799327	0.8557884893599552	1.6983458346224258	-0.2644868363867793	EPM2AIP1;C2CD5;VGF;PRKAR2B;SHC1;PRKAR2A;ATP6V1H;MAPK1;IRS2;SOGA1;PRKACB;MTOR
negative regulation of cell motility (GO:2000146)	6/170	0.4563570900970378	0.8455245664600445	1.5763562467201109	-0.2645095130134604	RNF20;OSBPL8;STK24;DPYSL3;PTPN23;PFN2
mRNA transport (GO:0051028)	5/134	0.4246621698604539	0.8373355170710431	1.4911113778570961	-0.26471764721803165	NDC1;NXF1;SEH1L;KIF5C;SUPT6H
single fertilization (GO:0007338)	1/60	0.8514651142632723	0.95941631733944	6.4266051398226525	-0.2662554218723051	PARK7
pyridine-containing compound metabolic process (GO:0072524)	1/61	0.8560463335323162	0.9607718123780218	6.654323300319086	-0.2662950142569316	TKT
osteoblast differentiation (GO:0001649)	2/98	0.8168450819412546	0.9445136850486799	4.674318432109581	-0.2668339489007753	FIGNL1;PSMC2
protein autophosphorylation (GO:0046777)	6/170	0.4563570900970378	0.8455245664600445	1.5975290630691978	-0.2680622704268135	STK24;CDK5;KIT;DYRK1A;CLK3;MTOR
cellular lipid catabolic process (GO:0044242)	3/131	0.7842470237929818	0.9340027368790788	3.926494456182576	-0.2680849839913288	SGPL1;ABCD3;PRKACB
positive regulation of response to external stimulus (GO:0032103)	7/201	0.45724454680399473	0.8455245664600445	1.6001376621139407	-0.2684999882741643	LARP1;ZC3HAV1;MIF;S100A9;SQSTM1;PAFAH1B2;S100A8
calcium ion homeostasis (GO:0055074)	7/274	0.7642934390531471	0.9277211014371107	3.583362456842105	-0.2688386458212249	PKHD1;VAPB;EPHX2;RAP1GDS1;ANXA7;IMMT;CHERP
angiogenesis (GO:0001525)	6/236	0.7576384345635778	0.9263644487957075	3.518559757202171	-0.2691260102623692	VAV3;SRPK2;GPI;SHC1;PDCD6;PIK3R6
organelle assembly (GO:0070925)	8/278	0.6558231497372086	0.9062978803948596	2.749725991590788	-0.27053795291048066	TMOD1;PKHD1;DBNL;HAUS8;CCP110;CSNK1D;SEPT2;PUM2
regulation of response to wounding (GO:1903034)	9/347	0.7695180982736635	0.9287881490612314	3.670067718333393	-0.2711248143502186	PSMA6;VTN;STK24;ZYX;PARK7;S100A9;UACA;ISL1;S100A8
purine ribonucleoside biosynthetic process (GO:0046129)	4/95	0.36203446875834916	0.8159963567622832	1.3377345149397633	-0.27202214502498595	NME7;ATP5H;HPRT1;ATP5L
response to virus (GO:0009615)	7/250	0.6792665221903056	0.9135528425069609	3.0150325748135027	-0.2726013320012003	CDK6;PRKRA;DHX36;TRIM25;ZC3HAV1;ABCE1;TRIM56
purine nucleoside biosynthetic process (GO:0042451)	4/95	0.36203446875834916	0.8159963567622832	1.340857705932888	-0.27265723151171745	NME7;ATP5H;HPRT1;ATP5L
negative regulation of phosphate metabolic process (GO:0045936)	13/458	0.6930840221695119	0.9147989897508119	3.0681110332669936	-0.27321811377340827	FARP1;FKBP15;ABCA7;IRS2;PARK7;DYNLL1;LEMD2;PRKAR2B;PKIA;PARD3;CASP3;PRKAR2A;TIPRL
regulation of blood circulation (GO:1903522)	5/204	0.7735026984923824	0.9298533798799762	3.7593863103580833	-0.2734140058719067	CELF2;EPHX2;PDE4B;DBH;SRI
negative regulation of phosphorus metabolic process (GO:0010563)	13/458	0.6930840221695119	0.9147989897508119	3.070615124391398	-0.2734411053947376	FARP1;FKBP15;ABCA7;IRS2;PARK7;DYNLL1;LEMD2;PRKAR2B;PKIA;PARD3;CASP3;PRKAR2A;TIPRL
response to oxidative stress (GO:0006979)	8/290	0.7000065809398234	0.9147989897508119	3.0730379229664138	-0.2736568578396593	STK24;PRKRA;CASP3;MSRB3;TRAF2;PARK7;UACA;RBM11
guanosine-containing compound metabolic process (GO:1901068)	7/269	0.7480471960614774	0.9213712540488704	3.3484338515021337	-0.27421069866833253	ARF3;NME7;SRP54;HPRT1;DNM1L;GNL1;DNM2
cytokine-mediated signaling pathway (GO:0019221)	9/342	0.7552129483881086	0.9245913152026607	3.497525362431389	-0.27421809161538996	PPM1B;SEH1L;KIT;CTR9;KPNA4;TRAF2;ARIH1;KPNA3;KPNA1
regulation of cellular carbohydrate metabolic process (GO:0010675)	5/137	0.44281552934827445	0.8426322540187647	1.6015343770495123	-0.27422216479333733	EPM2AIP1;WDR5;IRS2;SOGA1;MTOR
lipid homeostasis (GO:0055088)	2/96	0.8079606253855449	0.9434338115766332	4.709735465468066	-0.2742435097248756	EPHX2;IRS2
toll-like receptor 4 signaling pathway (GO:0034142)	2/97	0.8124497563762538	0.9434338115766332	4.714934649701424	-0.2745462533805048	MAPK1;PPP2R5D
cell morphogenesis (GO:0000902)	7/204	0.4721564381694124	0.8499445106818652	1.6984362805569972	-0.2761389263097994	EPB41L5;CUL7;DAB2;CUL3;MAP7;ARHGEF2;FERMT2
positive regulation of cell motility (GO:2000147)	8/287	0.6893102809389873	0.9147989897508119	3.101865269081176	-0.2762239595661512	EPB41L5;VTN;DAB2;PDCD6;KIT;MAPK1;IRS2;ARHGEF7
cellular divalent inorganic cation homeostasis (GO:0072503)	7/271	0.7546385753718148	0.9245913152026607	3.528413256440319	-0.2766398093933731	PKHD1;VAPB;EPHX2;RAP1GDS1;ANXA7;IMMT;CHERP
acute inflammatory response (GO:0002526)	1/59	0.8467384338655801	0.9571240484553697	6.317446505869974	-0.27684486998536123	S100A8
activation of MAPK activity (GO:0000187)	5/133	0.41858574284232636	0.8307451867715117	1.4929753597767748	-0.2768456541497901	DAB2;DBNL;SHC1;KIT;MAPK1
rhythmic process (GO:0048511)	7/252	0.6870261548467677	0.9147989897508119	3.1095468746877377	-0.276908013621503	SGPL1;VGF;CDK5;MAGED1;KIT;DYRK1A;CSNK1D
regulation of T cell differentiation (GO:0045580)	2/97	0.8124497563762538	0.9434338115766332	4.760676762453381	-0.27720977400396746	SART1;AP3D1
cellular modified amino acid metabolic process (GO:0006575)	5/199	0.7551800062375293	0.9245913152026607	3.541664223785184	-0.27767873108823704	GGCT;CBS;CKMT1A;GART;AASDHPPT
nucleosome assembly (GO:0006334)	2/97	0.8124497563762538	0.9434338115766332	4.769445193893644	-0.27772035160022335	NAP1L1;NAP1L4
regulation of stress-activated MAPK cascade (GO:0032872)	6/170	0.4563570900970378	0.8455245664600445	1.655186267551225	-0.2777370372258735	DAB2;DBNL;DVL2;MAPK1;TRAF2;STK3
RNA splicing, via transesterification reactions (GO:0000375)	5/184	0.6936802813766947	0.9147989897508119	3.1189005709190067	-0.2777409688872698	RBM17;SART1;PPIH;PLRG1;BCAS2
response to extracellular stimulus (GO:0009991)	9/313	0.6604814305505025	0.9077371064382024	2.8694785126228224	-0.27776687630171615	VGF;AGL;COX4I1;TRIM25;ASNS;SQSTM1;GLUL;MTOR;CPEB4
fat cell differentiation (GO:0045444)	4/96	0.36904433965598626	0.8159963567622832	1.3681686026412383	-0.2782107764208101	OSBPL8;CTBP2;CTBP1;CREB5
activation of phospholipase C activity (GO:0007202)	3/59	0.2969437424206025	0.8095203073887572	1.320874378741588	-0.2791184821554035	PRKAR2B;PRKAR2A;PRKACB
myelination (GO:0042552)	1/59	0.8467384338655801	0.9571240484553697	6.3791579435296875	-0.2795492054980781	PARD3
DNA repair (GO:0006281)	12/403	0.6261429485540566	0.8950972549460097	2.5351184556961917	-0.280949183836136	BABAM1;RFC3;RAD50;RFC4;BRE;INTS3;RPA1;STUB1;CSNK1D;MMS19;BRCC3;WDR33
negative regulation of phosphorylation (GO:0042326)	9/325	0.7020755996261981	0.9147989897508119	3.158411436399163	-0.28125944785461937	PRKAR2B;CASP3;PKIA;PRKAR2A;PARD3;IRS2;PARK7;DYNLL1;LEMD2
regulation of stress-activated protein kinase signaling cascade (GO:0070302)	6/171	0.4617712753007588	0.8455245664600445	1.6773085881988061	-0.2814491196142261	DAB2;DBNL;DVL2;MAPK1;TRAF2;STK3
response to nutrient (GO:0007584)	4/163	0.7586909399865656	0.926639167496619	3.6986128520019634	-0.2818011478020914	AGL;COX4I1;TRIM25;MTOR
regulation of lymphocyte activation (GO:0051249)	10/344	0.6513350072966191	0.9059152311933655	2.8549306624906694	-0.2820943886922786	VAV3;SART1;HSPH1;CASP3;AP3D1;IRS2;TRAF2;MIF;SUPT6H;MTOR
multicellular organismal reproductive process (GO:0048609)	15/491	0.5936871003260057	0.8860121384299264	2.3315497850800546	-0.2821749458956672	NDC1;YBX2;DBH;DYNLL1;SPATA5;DPCD;WDR33;SGPL1;SPATA16;AKAP9;KIT;SP3;MAP7;SBF1;PAFAH1B2
regulation of mitochondrion organization (GO:0010821)	2/97	0.8124497563762538	0.9434338115766332	4.85215977608626	-0.2825367446847711	DYNLL1;DNM1L
negative regulation of response to external stimulus (GO:0032102)	6/215	0.6770027544920267	0.9112143084596895	3.0387899653052775	-0.28253807326191877	VTN;PPM1B;CTNNA2;ISL1;UACA;MTOR
establishment of protein localization to membrane (GO:0090150)	6/229	0.7325330768705254	0.9186344023239151	3.329780956292757	-0.28258871011860354	SRP72;SSR4;ASNA1;PARD3;SRP54;SRP68
pigment metabolic process (GO:0042440)	3/60	0.30539059300020854	0.8095203073887572	1.3386701338901439	-0.28287896403454055	AP3D1;HPRT1;GART
positive regulation of response to wounding (GO:1903036)	3/130	0.7799671087780704	0.9320279232625346	4.020867707838686	-0.2830389468638579	VTN;S100A9;S100A8
positive regulation of cell migration (GO:0030335)	8/280	0.6634427325964365	0.9077371064382024	2.9266102245454895	-0.2832972530195482	EPB41L5;VTN;DAB2;PDCD6;KIT;MAPK1;IRS2;ARHGEF7
chondroitin sulfate metabolic process (GO:0030204)	1/59	0.8467384338655801	0.9571240484553697	6.472865356499353	-0.283655677398734	NDNF
glycosylation (GO:0070085)	8/273	0.6363432773119018	0.8975972822017798	2.6265254735101045	-0.2837534543369219	ARF4;LMAN1;COG7;COG6;COG2;STT3A;MOGS;CLASP2
cellular response to hormone stimulus (GO:0032870)	13/462	0.7044338212216167	0.9147989897508119	3.2005910501824983	-0.2850155813167459	C2CD5;SHC1;ASNS;IRS2;ISL1;SOGA1;MTOR;PRKAR2B;PRKAR2A;KIT;ATP6V1H;MAPK1;PRKACB
regulation of endopeptidase activity (GO:0052548)	11/354	0.5690135093591651	0.878984186498818	2.211912750784094	-0.28531102426529764	VTN;GPI;SERPINB12;HIP1;PDCD6;CASP3;TRAF2;PARK7;UACA;S100A9;S100A8
fatty acid metabolic process (GO:0006631)	9/280	0.5309470592741082	0.8647703435980814	1.9659104093219082	-0.2856296909119437	LYPLA2;SGPL1;ABCD3;PRKAR2B;EPHX2;RNPEP;TECR;MIF;AASDHPPT
in utero embryonic development (GO:0001701)	6/222	0.7056506634910938	0.9152910031964097	3.229359307915741	-0.2858410166806044	EPB41L5;DAB2;KDM1A;PRMT1;RPA1;BRK1
tissue homeostasis (GO:0001894)	3/129	0.7756176363145301	0.9298533798799762	3.9392127226959177	-0.28649248616093487	IGHG3;LDB1;RPA1
positive regulation of cytokine production (GO:0001819)	9/327	0.7086846865281047	0.9152910031964097	3.239809969444315	-0.2867660384671211	DHX36;PDE4B;TRAF2;PARK7;ZC3HAV1;MIF;ARHGEF2;ISL1;TRIM56
tRNA metabolic process (GO:0006399)	4/146	0.6808806736973686	0.9135528425069609	3.171872095140425	-0.28678182958809384	QARS;LARS;EEF1E1;EPRS
cell-substrate adhesion (GO:0031589)	5/140	0.4608291625981432	0.8455245664600445	1.7113631168733623	-0.28716340330761836	EPB41L5;VTN;CDK5;ZYX;FERMT2
response to molecule of bacterial origin (GO:0002237)	7/243	0.6511758037427774	0.9059152311933655	2.9088231163723877	-0.2874194773302027	CTR9;DPYSL3;PDE4B;MAPK1;S100A9;S100A8;ADH5
small molecule catabolic process (GO:0044282)	7/261	0.7204411862875185	0.9152910031964097	3.2508175631880065	-0.287740356121769	ABCD3;NAGK;CBS;ABAT;IDNK;GLUL;ADH5
cofactor biosynthetic process (GO:0051188)	3/127	0.7667075953888197	0.9287881490612314	3.899911610645268	-0.288104441816299	TECR;GART;GPHN
negative regulation of ion transport (GO:0043271)	2/94	0.7986948867546751	0.9401855372228047	4.672637075863422	-0.2881991112861234	IRS2;SRI
blood coagulation (GO:0007596)	14/472	0.6358488487112833	0.8975972822017798	2.6677635663475674	-0.2882085610590581	VAV3;KDM1A;SHC1;SLC3A2;PIK3R6;LMAN1;CDK5;KIF2A;PRKAR2B;PRKAR2A;KIF5A;MAPK1;KIF3C;PRKACB
mitochondrion organization (GO:0007005)	5/179	0.6709934317552575	0.909932271648907	3.0558351014766636	-0.2884253291404071	GGCT;CASP3;PARK7;SSBP1;DNM1L
coagulation (GO:0050817)	14/472	0.6358488487112833	0.8975972822017798	2.670275737855569	-0.28847996042315016	VAV3;KDM1A;SHC1;SLC3A2;PIK3R6;LMAN1;KIF2A;CDK5;PRKAR2B;PRKAR2A;KIF5A;MAPK1;KIF3C;PRKACB
regulation of neuron differentiation (GO:0045664)	13/405	0.5218442533040291	0.8598980168195873	1.9122238906520657	-0.2886339077028398	CUL7;SKOR2;GDI1;NDNF;ISL1;PBX1;CDK5;STK24;DPYSL2;MAP1B;DPYSL3;FKBP4;PDLIM5
positive regulation of lymphocyte activation (GO:0051251)	8/243	0.5082492914126738	0.8598980168195873	1.9127450363432543	-0.2887125702057327	VAV3;SART1;HSPH1;AP3D1;TRAF2;IRS2;MIF;MTOR
monocarboxylic acid metabolic process (GO:0032787)	15/473	0.5364755956159603	0.8647703435980814	1.9896324333499096	-0.2890762947646904	GPI;LYPLA2;ABCD3;EPHX2;TECR;ABAT;PPP2R5D;PARK7;MIF;ENO2;SGPL1;PRKAR2B;RNPEP;IDNK;AASDHPPT
membrane lipid metabolic process (GO:0006643)	4/162	0.7545548495450939	0.9245913152026607	3.689682045039479	-0.28928384049084743	SGPL1;VAPB;KIT;MAP7
regulation of peptidase activity (GO:0052547)	11/372	0.6330607057461118	0.8968085772154885	2.6561795763994454	-0.2892920692487064	VTN;GPI;SERPINB12;HIP1;CASP3;PDCD6;TRAF2;PARK7;UACA;S100A9;S100A8
regulation of postsynaptic membrane potential (GO:0060078)	1/58	0.8418616842829689	0.9542664926667054	6.185911336631441	-0.2895767627791249	CDK5
small molecule biosynthetic process (GO:0044283)	12/394	0.5957428472481437	0.8860121384299264	2.3937953506471823	-0.2897081923262368	GGCT;CBS;ASNSD1;RNPEP;TECR;ASNS;PARK7;MIF;GART;LBR;GLUL;AASDHPPT
positive regulation of locomotion (GO:0040017)	8/304	0.7467421968791607	0.9205796361626917	3.5035748106013758	-0.28992700997887016	EPB41L5;VTN;DAB2;PDCD6;KIT;MAPK1;IRS2;ARHGEF7
embryo development ending in birth or egg hatching (GO:0009792)	6/230	0.7362283141769157	0.9186344023239151	3.419176626443193	-0.2901754575502201	EPB41L5;DAB2;KDM1A;PRMT1;RPA1;BRK1
organophosphate biosynthetic process (GO:0090407)	13/436	0.6263162930177775	0.8950972549460097	2.619144784863914	-0.29026122546771144	ARF3;VAC14;RRM1;NPR2;CTPS2;ATP5H;GPHN;PIK3R6;ATP5L;NME7;HPRT1;TKT;GART
circadian rhythm (GO:0007623)	3/127	0.7667075953888197	0.9287881490612314	3.933146137054941	-0.2905596294298213	MAGED1;DYRK1A;CSNK1D
neutral lipid metabolic process (GO:0006638)	2/94	0.7986948867546751	0.9401855372228047	4.71838256139267	-0.29102060331746105	TECR;PRKACB
embryonic pattern specification (GO:0009880)	1/58	0.8418616842829689	0.9542664926667054	6.2235875313778655	-0.2913404722658578	EPB41L5
regulation of anatomical structure size (GO:0090066)	6/232	0.7435099140990448	0.9205796361626917	3.5241264908768883	-0.2916276978575167	ARPC1B;RAP1GDS1;WASH1;ARPC5;MTOR;PFN2
cellular response to external stimulus (GO:0071496)	5/185	0.6980870480389058	0.9147989897508119	3.2798047187456083	-0.29206963147178194	ASNS;GLUL;SQSTM1;MTOR;CPEB4
lipid transport (GO:0006869)	5/193	0.7317628177573268	0.9186344023239151	3.442848211742964	-0.29218439532844936	OSBPL8;VPS51;PITPNM3;HDLBP;ABCA7
ncRNA processing (GO:0034470)	7/241	0.6428895054010041	0.8975972822017798	2.7106460916705086	-0.2928413220255122	UTP15;LAS1L;INTS3;HEATR1;GAR1;IMP4;PA2G4
regulation of cell-cell adhesion (GO:0022407)	2/94	0.7986948867546751	0.9401855372228047	4.750990260921403	-0.2930317824166915	EPB41L5;MYO10
alpha-amino acid metabolic process (GO:1901605)	7/213	0.516204433228108	0.8598980168195873	1.9483908221467836	-0.2940929979369764	CBS;ASNSD1;CKMT1A;CTPS2;ASNS;GART;GLUL
chordate embryonic development (GO:0043009)	6/226	0.7212295476689847	0.9152910031964097	3.323362459123573	-0.29416153903516684	EPB41L5;DAB2;KDM1A;PRMT1;RPA1;BRK1
cellular calcium ion homeostasis (GO:0006874)	7/261	0.7204411862875185	0.9152910031964097	3.326252705634283	-0.2944173640835144	PKHD1;VAPB;EPHX2;RAP1GDS1;ANXA7;IMMT;CHERP
negative regulation of sequence-specific DNA binding transcription factor activity (GO:0043433)	3/126	0.7621458532474615	0.926639167496619	3.8697286122648733	-0.29483863498408047	PKHD1;KDM1A;PBX1
response to radiation (GO:0009314)	13/442	0.6452211853539614	0.8999553953637401	2.7988729412427884	-0.29502941390922205	RRM1;INTS3;ASNS;BRCC3;DBH;UACA;TROVE2;BABAM1;BRE;CDK5;FIGNL1;CASP3;KIT
regulation of cellular response to growth factor stimulus (GO:0090287)	6/176	0.4886224278708543	0.8557884893599552	1.8958538299695231	-0.29524515650363703	VTN;DAB2;SKOR2;FAM89B;PDCD6;STUB1
cell junction organization (GO:0034330)	5/189	0.7152760402581844	0.9152910031964097	3.3405100357359583	-0.2956793263933213	PARD3;STRN;ARHGEF7;MLLT4;FERMT2
positive regulation of cellular component movement (GO:0051272)	8/296	0.7206822448417629	0.9152910031964097	3.3468416156077745	-0.2962397549660472	EPB41L5;VTN;DAB2;PDCD6;KIT;MAPK1;IRS2;ARHGEF7
response to nutrient levels (GO:0031667)	9/291	0.5762783261016422	0.8807826499944906	2.337307501933247	-0.29670807922580583	VGF;AGL;COX4I1;TRIM25;ASNS;SQSTM1;GLUL;MTOR;CPEB4
acylglycerol metabolic process (GO:0006639)	2/93	0.7939152465188344	0.9388336636588628	4.701614887280003	-0.29675162687471957	TECR;PRKACB
epithelial cell differentiation (GO:0030855)	9/303	0.623397881865121	0.8925584798659387	2.6147644846549394	-0.2972026131397296	DAB2;CASP3;KIT;ANXA7;TAGLN2;MSI1;EDF1;LOR;CNN3
cellular response to cytokine stimulus (GO:0071345)	14/471	0.6327986650569963	0.8968085772154885	2.7300725181800276	-0.2973399596174576	SEH1L;NPR2;CTR9;TRAF2;EPRS;PPM1B;DPYSL3;KIT;MAPK1;KPNA4;ARIH1;ARHGEF2;KPNA3;KPNA1
positive regulation of neuron projection development (GO:0010976)	4/144	0.6706691102000373	0.909932271648907	3.150553798483105	-0.2973653636817447	CUL7;MAP1B;DPYSL3;NDNF
anatomical structure homeostasis (GO:0060249)	6/208	0.6466281671813751	0.9010340555922737	2.856321307686063	-0.29766359747043974	IGHG3;RFC3;RAD50;RFC4;LDB1;RPA1
negative regulation of immune system process (GO:0002683)	10/311	0.5272504145776489	0.8598980168195873	1.9723885617563826	-0.2977152523149362	PPP3CB;PPM1B;RBM15;CDK6;LDB1;PRMT1;CASP3;CTR9;WDR61;MIF
regulation of extrinsic apoptotic signaling pathway in absence of ligand (GO:2001239)	1/58	0.8418616842829689	0.9542664926667054	6.360753524819205	-0.29776152846640713	TRAF2
regulation of protein secretion (GO:0050708)	4/161	0.7503644847862493	0.9238253656848887	3.7624132635783587	-0.29810436814540636	MYO18A;TRAF2;MIF;DNM1L
coenzyme metabolic process (GO:0006732)	6/196	0.5907587368012931	0.8860121384299264	2.4631953740256027	-0.2981073043534721	TECR;SUCLG1;TKT;GART;GPHN;AASDHPPT
regulation of organ morphogenesis (GO:2000027)	4/150	0.7006345797817626	0.9147989897508119	3.3522322559419617	-0.29851937037740744	MAGED1;CARM1;DVL2;ISL1
positive regulation of T cell activation (GO:0050870)	5/189	0.7152760402581844	0.9152910031964097	3.3836291971883314	-0.2994959425616585	SART1;HSPH1;AP3D1;TRAF2;MTOR
negative regulation of protein kinase activity (GO:0006469)	5/189	0.7152760402581844	0.9152910031964097	3.396680414562864	-0.30065114794066716	PRKAR2B;PKIA;PRKAR2A;CASP3;PARK7
negative regulation of extrinsic apoptotic signaling pathway (GO:2001237)	4/97	0.37604950350389593	0.8160154184847576	1.4802134133759488	-0.30095999455266986	DAB2;CTTN;PARK7;ARHGEF2
regulation of inflammatory response (GO:0050727)	8/247	0.5262583948083203	0.8598980168195873	1.994490445435761	-0.3010513433893957	PSMA6;VTN;ZYX;PARK7;UACA;ISL1;S100A9;S100A8
immune response-activating cell surface receptor signaling pathway (GO:0002429)	9/324	0.6987358547064745	0.9147989897508119	3.383220417985046	-0.3012788947528017	IGHG3;ENAH;RNF31;VAV3;MYO10;PDE4B;BRK1;MAPK1;ARPC5
ribonucleoprotein complex subunit organization (GO:0071826)	4/145	0.6758027120597397	0.9100297883986268	3.195924230983575	-0.30130517048044425	SRPK2;SART1;CELF2;PUM2
positive regulation of cell activation (GO:0050867)	8/272	0.6323750518995382	0.8968085772154885	2.7680081102130605	-0.30147163279758465	VAV3;SART1;HSPH1;AP3D1;IRS2;TRAF2;MIF;MTOR
transmembrane receptor protein serine/threonine kinase signaling pathway (GO:0007178)	6/196	0.5907587368012931	0.8860121384299264	2.4911619535262264	-0.30149194923987943	PARD3;ZYX;SMAD9;NEDD8;STUB1;FERMT2
regulation of ion homeostasis (GO:2000021)	4/160	0.7461196163531448	0.9205796361626917	3.6442280934276745	-0.30156631781101595	FHL1;AP3D1;SRI;CHERP
protein acylation (GO:0043543)	4/154	0.7194950013803423	0.9152910031964097	3.410283443461298	-0.301855195938898	PPM1B;GTF3C4;LDB1;WDR5
positive regulation of leukocyte activation (GO:0002696)	8/262	0.5914386535345089	0.8860121384299264	2.4945774399572964	-0.30190530721536074	VAV3;SART1;HSPH1;AP3D1;IRS2;TRAF2;MIF;MTOR
chromatin assembly or disassembly (GO:0006333)	1/58	0.8418616842829689	0.9542664926667054	6.454994145122642	-0.3021731490449567	CTCF
negative regulation of cellular catabolic process (GO:0031330)	5/145	0.49045711247393464	0.8557884893599552	1.9418595576300977	-0.30240972164494245	UBXN1;HERC1;ABCA7;PARK7;MTOR
regulation of carbohydrate metabolic process (GO:0006109)	5/145	0.49045711247393464	0.8557884893599552	1.951037154586347	-0.3038389674057924	EPM2AIP1;WDR5;IRS2;SOGA1;MTOR
cell morphogenesis involved in differentiation (GO:0000904)	5/147	0.5021453910008252	0.8598980168195873	2.014117934375263	-0.3040139456551121	EPB41L5;DAB2;CUL7;CUL3;FERMT2
signal release (GO:0023061)	3/124	0.7528061166859434	0.9245913152026607	3.8799495017364833	-0.3042014675172018	VGF;STXBP1;ABAT
response to lipopolysaccharide (GO:0032496)	7/228	0.58638097783147	0.885173832777442	2.509851427959676	-0.30612967091784454	CTR9;DPYSL3;PDE4B;MAPK1;S100A9;S100A8;ADH5
adaptive immune response based on somatic recombination of immune receptors built from immunoglobulin superfamily domains (GO:0002460)	1/57	0.8368301118150515	0.9527028784688462	6.324595865635826	-0.3064405768049553	GNL1
regulation of immune effector process (GO:0002697)	8/264	0.5998018708261885	0.8864833455574148	2.5489184803875076	-0.3071266824949214	VTN;PPM1B;PPP3CB;ATP6V1H;TRAF2;ZC3HAV1;MIF;SUPT6H
regulation of transmembrane transporter activity (GO:0022898)	4/141	0.6549358211538502	0.9059152311933655	3.11025271802616	-0.30732264383774854	FHL1;PDE4B;PARK7;SRI
T cell differentiation (GO:0030217)	4/97	0.37604950350389593	0.8160154184847576	1.5128842813366608	-0.30760270171545756	PPP3CB;CDK6;SP3;KIT
T cell receptor signaling pathway (GO:0050852)	4/99	0.3900371391568805	0.8160154184847576	1.5154729025902585	-0.30812902544103765	ENAH;RNF31;PDE4B;MAPK1
cellular response to organonitrogen compound (GO:0071417)	13/411	0.5428091270620958	0.8658155677872128	2.1395125985596213	-0.30826817107389537	C2CD5;SHC1;IRS2;SOGA1;MTOR;PRKAR2B;PRKAR2A;PDE4B;ATP6V1H;MAPK1;ARHGEF2;PRKACB;CPEB4
regulation of transporter activity (GO:0032409)	4/153	0.7148635562986488	0.9152910031964097	3.486463817806163	-0.3085981667815879	FHL1;PDE4B;PARK7;SRI
regulation of myotube differentiation (GO:0010830)	1/57	0.8368301118150515	0.9527028784688462	6.391269742888776	-0.3096710727666388	MTOR
protein ubiquitination involved in ubiquitin-dependent protein catabolic process (GO:0042787)	1/57	0.8368301118150515	0.9527028784688462	6.394682220521731	-0.30983641481163154	UBR4
positive regulation of MAPK cascade (GO:0043410)	12/395	0.5991748767162316	0.8864833455574148	2.5745141257931135	-0.31021077707080796	DAB2;DBNL;SHC1;MAGED1;KIT;DVL2;MAPK1;ABCA7;TRAF2;MIF;PIK3R6;STK3
regulation of JNK cascade (GO:0046328)	5/148	0.507950686224993	0.8598980168195873	2.062720852554733	-0.3113501421478346	DAB2;DBNL;DVL2;TRAF2;STK3
neurotransmitter transport (GO:0006836)	4/99	0.3900371391568805	0.8160154184847576	1.5315403125594937	-0.31139588383667116	STXBP1;ABAT;PARK7;GLUL
stem cell differentiation (GO:0048863)	3/62	0.3223088410666766	0.8106726404691404	1.4883771568714677	-0.3123969037364283	CDK6;KIT;ISL1
cell junction assembly (GO:0034329)	5/160	0.5752636625741162	0.8807826499944906	2.4628560026820003	-0.3126457572917132	PARD3;STRN;ARHGEF7;MLLT4;FERMT2
alpha-amino acid catabolic process (GO:1901606)	2/92	0.7890357384811829	0.9362915149658652	4.750418270746067	-0.3127124501560059	CBS;GLUL
negative regulation of kinase activity (GO:0033673)	6/202	0.6192704630647116	0.8912732502688764	2.717803141289069	-0.3128306116039719	PRKAR2B;CASP3;PKIA;PRKAR2A;IRS2;PARK7
regulation of peptidyl-serine phosphorylation (GO:0033135)	4/98	0.3830478053618248	0.8160154184847576	1.5393420426248798	-0.31298214742323394	DOCK7;MIF;PARK7;PFN2
carboxylic acid catabolic process (GO:0046395)	6/200	0.60989106108206	0.8877794863005404	2.630822839707152	-0.3131518229320406	ABCD3;NAGK;CBS;ABAT;IDNK;GLUL
cell-cell junction organization (GO:0045216)	5/161	0.58065471257189	0.8807826499944906	2.4683530330953984	-0.3133435744741148	PARD3;STRN;ARHGEF7;MLLT4;FERMT2
organic acid catabolic process (GO:0016054)	6/200	0.60989106108206	0.8877794863005404	2.633429012700414	-0.3134620406370865	ABCD3;NAGK;CBS;ABAT;IDNK;GLUL
cellular carbohydrate metabolic process (GO:0044262)	5/165	0.6018475505160508	0.8864833455574148	2.6075542548489725	-0.31419187937133636	PYGB;NAGK;AGL;IDNK;GNE
dicarboxylic acid transport (GO:0006835)	1/57	0.8368301118150515	0.9527028784688462	6.4872114015727105	-0.31431965709539783	STXBP1
neuron differentiation (GO:0030182)	7/222	0.5588800971083456	0.8718897400856472	2.2997422312064697	-0.31527697010613415	SKOR2;HERC1;LDB1;CDK5;CASP3;HPRT1;ISL1
gland development (GO:0048732)	7/220	0.5495355274997197	0.8682645208490143	2.238156779526953	-0.31615948239748687	KDM1A;SP3;ASNS;IRS2;FKBP4;ISL1;PBX1
mitochondrial transport (GO:0006839)	3/111	0.6848268507675495	0.9135528425069609	3.5034737398393845	-0.3167632801348816	TOMM70A;ATP5H;ATP5L
regulation of response to biotic stimulus (GO:0002831)	4/107	0.44539266979710407	0.8426322540187647	1.8503176560078034	-0.3168199949104852	PPM1B;ATP6V1H;ZC3HAV1;MIF
cell-matrix adhesion (GO:0007160)	4/100	0.39701544824644286	0.8229678825166789	1.6269848664967521	-0.31699864655196974	VTN;CDK5;ZYX;FERMT2
regulation of muscle cell differentiation (GO:0051147)	3/122	0.7431745135569326	0.9205796361626917	3.83137111373288	-0.3170527336144764	CTNNA2;SUPT6H;MTOR
DNA conformation change (GO:0071103)	4/99	0.3900371391568805	0.8160154184847576	1.5602107727534367	-0.3172252199755135	TOP3B;RAD50;MCM5;SRPK1
protein acetylation (GO:0006473)	3/122	0.7431745135569326	0.9205796361626917	3.834996439667635	-0.3173527357452378	GTF3C4;LDB1;WDR5
positive regulation of carbohydrate metabolic process (GO:0045913)	3/63	0.3307716814351189	0.8106726404691404	1.512870685435304	-0.31753787385250154	EPM2AIP1;WDR5;IRS2
regulation of chemokine production (GO:0032642)	1/56	0.8316388124895168	0.9498718002892311	6.175200612137301	-0.31757976432501045	MIF
response to starvation (GO:0042594)	4/106	0.4385449117985466	0.8426322540187647	1.8548455139647344	-0.31759527580899066	ASNS;GLUL;SQSTM1;CPEB4
cellular response to decreased oxygen levels (GO:0036294)	4/101	0.40398072570320764	0.8246947149539122	1.6490246198739749	-0.3178363092370185	TCEB2;TCEB1;MTOR;CPEB4
regulation of actin filament bundle assembly (GO:0032231)	3/62	0.3223088410666766	0.8106726404691404	1.514326599391138	-0.31784345702395067	SYNPO;MTOR;PFN2
respiratory electron transport chain (GO:0022904)	3/112	0.6905138768107331	0.9147989897508119	3.5701643102809695	-0.31792642056941595	COX4I1;ATP5H;ATP5L
glycolipid metabolic process (GO:0006664)	2/92	0.7890357384811829	0.9362915149658652	4.834141055102163	-0.31822378737679463	KIT;MAP7
heart development (GO:0007507)	5/167	0.6122140521874889	0.8892424741681402	2.716870199238978	-0.318920708469594	PPP3CB;SHC1;CASP3;DVL2;SRI
apoptotic mitochondrial changes (GO:0008637)	3/61	0.31384707329080896	0.8095203073887572	1.5104946059365745	-0.31918778083545746	GGCT;CASP3;DNM1L
monocarboxylic acid biosynthetic process (GO:0072330)	5/167	0.6122140521874889	0.8892424741681402	2.7196960201352693	-0.3192524183917338	RNPEP;TECR;MIF;PARK7;AASDHPPT
positive regulation of I-kappaB kinase/NF-kappaB signaling (GO:0043123)	5/168	0.6173382141346575	0.8912732502688764	2.7802078127802337	-0.32001365266126736	RNF31;TFG;TRIM25;ZC3HAV1;TMED4
kidney development (GO:0001822)	3/122	0.7431745135569326	0.9205796361626917	3.8715502343229287	-0.320377626880921	PKHD1;SGPL1;TMED10
hydrogen ion transmembrane transport (GO:1902600)	4/108	0.45221475748893564	0.8455245664600445	1.91075460615432	-0.320620907497088	COX4I1;ATP6V1H;ATP5H;ATP5L
internal protein amino acid acetylation (GO:0006475)	3/111	0.6848268507675495	0.9135528425069609	3.546681301110957	-0.32066985111310153	GTF3C4;LDB1;WDR5
protein-DNA complex subunit organization (GO:0071824)	4/136	0.6276177856948431	0.8956071161646431	2.9193635719458446	-0.32186990150637607	RPA1;NAP1L1;CTCF;NAP1L4
negative regulation of cellular response to growth factor stimulus (GO:0090288)	4/104	0.42477905147120953	0.8373355170710431	1.8132745521839837	-0.3219114147625239	SKOR2;FAM89B;PDCD6;STUB1
ribonucleoprotein complex assembly (GO:0022618)	4/138	0.638707833985238	0.8975972822017798	2.980239836740285	-0.321966551231435	SRPK2;SART1;CELF2;PUM2
nucleosome organization (GO:0034728)	3/120	0.7332470949597266	0.9186344023239151	3.7944380897970333	-0.32202279353968627	NAP1L1;CTCF;NAP1L4
regulation of cellular component size (GO:0032535)	5/165	0.6018475505160508	0.8864833455574148	2.673446284140852	-0.32213140372842625	ARPC1B;WASH1;ARPC5;MTOR;PFN2
electron transport chain (GO:0022900)	3/115	0.7071118298572884	0.9152910031964097	3.6406838674788524	-0.3222486811987731	COX4I1;ATP5H;ATP5L
negative regulation of defense response (GO:0031348)	3/120	0.7332470949597266	0.9186344023239151	3.7979337533868742	-0.32231946022071667	PPM1B;ISL1;UACA
SRP-dependent cotranslational protein targeting to membrane (GO:0006614)	4/108	0.45221475748893564	0.8455245664600445	1.9213883930148474	-0.322405236255146	SRP72;SSR4;SRP54;SRP68
regulation of stem cell differentiation (GO:2000736)	2/91	0.7840548506193185	0.9340027368790788	4.722149479506076	-0.32240905513688667	EPB41L5;DAB2
plasma membrane organization (GO:0007009)	3/121	0.7382480142767767	0.9186344023239151	3.806100766389123	-0.32301257057846133	MAP7;ABCA7;FNBP1L
regulation of embryonic development (GO:0045995)	4/101	0.40398072570320764	0.8246947149539122	1.6758982889100136	-0.32301599405138137	KDM1A;DVL2;E4F1;PRKACB
neuron migration (GO:0001764)	3/116	0.7124908726977655	0.9152910031964097	3.6499940089018557	-0.32307275186915907	CDK5;DCX;NDNF
protein-DNA complex assembly (GO:0065004)	3/113	0.6961235793362502	0.9147989897508119	3.629644367265019	-0.32322317443526694	RPA1;NAP1L1;NAP1L4
regulation of G-protein coupled receptor protein signaling pathway (GO:0008277)	4/137	0.6331897408750706	0.8968085772154885	2.9707353743942533	-0.32355123549809384	GPSM1;GIT2;DYNLT1;GIT1
regulation of adaptive immune response (GO:0002819)	3/112	0.6905138768107331	0.9147989897508119	3.6455447577429587	-0.3246391188543375	PPP3CB;TRAF2;SUPT6H
regulation of epithelial cell migration (GO:0010632)	4/129	0.5871404954441126	0.8858501692536107	2.680017516071757	-0.3248380940959165	EPB41L5;PDCD6;PTPN23;PFN2
stress-activated protein kinase signaling cascade (GO:0031098)	2/91	0.7840548506193185	0.9340027368790788	4.75933411438134	-0.3249478699388692	MAPK1;PPP2R5D
regulation of axonogenesis (GO:0050770)	3/114	0.7016561535224733	0.9147989897508119	3.6516913904601616	-0.3251864821599164	GDI1;CDK5;MAP1B
maintenance of location (GO:0051235)	5/152	0.5308918637131477	0.8647703435980814	2.238759969188255	-0.32527235981513436	SEH1L;SRI;S100A9;S100A8;CLASP2
peptidyl-lysine modification (GO:0018205)	5/153	0.5365529199744109	0.8647703435980814	2.2397323317064077	-0.3254136356353332	GTF3C4;LDB1;CTR9;WDR5;WDR61
neuron development (GO:0048666)	3/121	0.7382480142767767	0.9186344023239151	3.840101263617509	-0.3258980927137846	CDK5;MAP2;HPRT1
regulation of mitosis (GO:0007088)	3/112	0.6905138768107331	0.9147989897508119	3.660508774539161	-0.32597167833448726	RANBP1;CUL7;CUL3
Fc-epsilon receptor signaling pathway (GO:0038095)	8/295	0.7173032161456122	0.9152910031964097	3.684492084728853	-0.32612628792002296	TNRC6C;VAV3;PPP3CB;SHC1;KIT;MAPK1;IRS2;MTOR
inositol lipid-mediated signaling (GO:0048017)	4/136	0.6276177856948431	0.8956071161646431	2.964155629418422	-0.326808380312343	TNRC6C;KIT;IRS2;MTOR
phosphatidylinositol-mediated signaling (GO:0048015)	4/136	0.6276177856948431	0.8956071161646431	2.9668897315630476	-0.3271098245025959	TNRC6C;KIT;IRS2;MTOR
protein targeting to membrane (GO:0006612)	5/156	0.5533453257350432	0.8682645208490143	2.3160678275748787	-0.3271651084774812	SRP72;SSR4;PARD3;SRP54;SRP68
response to tumor necrosis factor (GO:0034612)	3/111	0.6848268507675495	0.9135528425069609	3.618897315769526	-0.32719919409672144	CASP3;TRAF2;ARHGEF2
regulation of release of sequestered calcium ion into cytosol (GO:0051279)	1/55	0.8262827274207084	0.9490904995090851	6.262288005018421	-0.3272115738962055	SRI
positive regulation of leukocyte proliferation (GO:0070665)	3/119	0.7281713190391091	0.9183598006082494	3.8440684328543178	-0.3273840301359658	VAV3;IRS2;MIF
central nervous system development (GO:0007417)	4/108	0.45221475748893564	0.8455245664600445	1.951209644620538	-0.32740918428788635	DCX;NES;STK3;SH3GL1
regulation of protein stability (GO:0031647)	4/138	0.638707833985238	0.8975972822017798	3.031587068598571	-0.3275137863743541	COG7;STXBP1;MAPK1;PARK7
positive regulation of homeostatic process (GO:0032846)	4/130	0.5930774871176134	0.8860121384299264	2.7071682916942748	-0.327634036007972	PPP3CB;KDM1A;DHX36;SRI
muscle tissue morphogenesis (GO:0060415)	1/56	0.8316388124895168	0.9498718002892311	6.372512134157169	-0.3277271507173678	ISL1
neural nucleus development (GO:0048857)	3/63	0.3307716814351189	0.8106726404691404	1.5619095115465633	-0.327830679926083	SCRIB;DYNLL1;INA
DNA catabolic process (GO:0006308)	4/102	0.4109310147112297	0.8246947149539122	1.70118052880572	-0.32788894362463294	RAD50;CASP3;RPA1;KPNA1
positive regulation of ion transport (GO:0043270)	6/186	0.5409120745842039	0.8647703435980814	2.26056703648654	-0.32844073710362615	DPYSL2;FHL1;ABCA7;PARK7;SRI;MIF
establishment of protein localization to mitochondrion (GO:0072655)	1/55	0.8262827274207084	0.9490904995090851	6.293213451024843	-0.328827463145166	TOMM70A
positive regulation of lipid metabolic process (GO:0045834)	4/103	0.4178644086673648	0.8298927222416099	1.7655950494171375	-0.3292107992736459	VAV3;KIT;IRS2;MTOR
proton transport (GO:0015992)	4/131	0.5989638622269062	0.8864833455574148	2.73528783991292	-0.3295828746211762	COX4I1;ATP6V1H;ATP5H;ATP5L
arachidonic acid metabolic process (GO:0019369)	1/55	0.8262827274207084	0.9490904995090851	6.307975917857979	-0.32959881859914536	EPHX2
regulation of neural precursor cell proliferation (GO:2000177)	3/65	0.3476843583201924	0.8159963567622832	1.6235182383759872	-0.3301349473741498	SKOR2;KDM1A;NES
peptide secretion (GO:0002790)	1/56	0.8316388124895168	0.9498718002892311	6.427144864601605	-0.33053681646731503	VGF
regulation of Ras protein signal transduction (GO:0046578)	3/109	0.6732202340373498	0.909932271648907	3.5022348266835417	-0.3305588158618484	CUL3;ARHGEF2;SQSTM1
response to ethanol (GO:0045471)	4/109	0.45900957117347757	0.8455245664600445	1.9709607140729803	-0.3307233753365346	ABAT;DBH;S100A9;S100A8
peptidyl-lysine acetylation (GO:0018394)	3/108	0.6673004444987154	0.9097471115398272	3.503055236066568	-0.3313491518029407	GTF3C4;LDB1;WDR5
phosphatidylinositol metabolic process (GO:0046488)	4/125	0.5628991228635166	0.8770883697562449	2.529447415862396	-0.33173077578658405	ARF3;VAC14;PITPNM3;PIK3R6
steroid biosynthetic process (GO:0006694)	3/108	0.6673004444987154	0.9097471115398272	3.5089483311781793	-0.3319065715223395	ACBD3;LBR;PBX1
mesenchyme development (GO:0060485)	1/55	0.8262827274207084	0.9490904995090851	6.356637646936229	-0.3321414485368686	EPB41L5
cellular amino acid catabolic process (GO:0009063)	3/117	0.7177935786871064	0.9152910031964097	3.7527725493644115	-0.33217001225351894	CBS;ABAT;GLUL
ossification (GO:0001503)	3/116	0.7124908726977655	0.9152910031964097	3.753680697685724	-0.3322503953929313	NPR2;SP3;DHX36
Fc receptor mediated stimulatory signaling pathway (GO:0002431)	6/204	0.6285214755819055	0.8964468789142123	3.0409334649655966	-0.33242341720235746	IGHG3;VAV3;MYO10;BRK1;MAPK1;ARPC5
skeletal muscle tissue development (GO:0007519)	1/56	0.8316388124895168	0.9498718002892311	6.46785427504477	-0.3326304302276421	CDK5
positive regulation of mononuclear cell proliferation (GO:0032946)	3/116	0.7124908726977655	0.9152910031964097	3.7581979421290366	-0.3326502312802252	VAV3;IRS2;MIF
muscle structure development (GO:0061061)	3/109	0.6732202340373498	0.909932271648907	3.525997883379814	-0.33280169455831093	FHL1;SRI;EMD
regulation of leukocyte mediated immunity (GO:0002703)	3/120	0.7332470949597266	0.9186344023239151	3.9229812775973154	-0.332931875581965	PPP3CB;TRAF2;SUPT6H
maintenance of protein location (GO:0045185)	3/108	0.6673004444987154	0.9097471115398272	3.5203013678784445	-0.3329804395682355	SEH1L;SRI;CLASP2
positive regulation of lymphocyte proliferation (GO:0050671)	3/115	0.7071118298572884	0.9152910031964097	3.7622491290120617	-0.33300881490842926	VAV3;IRS2;MIF
sensory perception of mechanical stimulus (GO:0050954)	4/127	0.5751171363509537	0.8807826499944906	2.624173914677913	-0.33312416151256774	MYO1A;GPR98;CASP3;TBL1X
cellular response to oxygen levels (GO:0071453)	4/109	0.45900957117347757	0.8455245664600445	1.9871636378337325	-0.3334421944373998	TCEB2;TCEB1;MTOR;CPEB4
protein targeting to ER (GO:0045047)	4/111	0.4725112120110813	0.8499445106818652	2.0524132879275605	-0.33368999953676054	SRP72;SSR4;SRP54;SRP68
response to UV (GO:0009411)	3/117	0.7177935786871064	0.9152910031964097	3.7724389220643237	-0.3339107463840269	CASP3;TROVE2;UACA
associative learning (GO:0008306)	3/65	0.3476843583201924	0.8159963567622832	1.6423106141511812	-0.3339562903322583	CDK5;KIT;DBH
hydrogen transport (GO:0006818)	4/133	0.6105825158944644	0.8877794863005404	2.8079929866688005	-0.33424072091969587	COX4I1;ATP6V1H;ATP5H;ATP5L
B cell activation (GO:0042113)	4/128	0.5811534960755982	0.8807826499944906	2.636127802917957	-0.3346416405845554	TXLNA;SP3;KIT;PFDN1
response to osmotic stress (GO:0006970)	3/64	0.33923150711032624	0.8159963567622832	1.6463236624113635	-0.33477232519091843	MAP7;ANXA7;ARHGEF2
synapse organization (GO:0050808)	4/111	0.4725112120110813	0.8499445106818652	2.061513829601307	-0.33516960394429346	FARP1;DBNL;CDK5;GPHN
establishment of protein localization to endoplasmic reticulum (GO:0072599)	4/115	0.49912217314758	0.8582245830905184	2.1974487498891135	-0.33596675690461564	SRP72;SSR4;SRP54;SRP68
sphingolipid metabolic process (GO:0006665)	4/128	0.5811534960755982	0.8807826499944906	2.652618979534942	-0.336735102969865	SGPL1;VAPB;KIT;MAP7
positive regulation of endothelial cell migration (GO:0010595)	1/55	0.8262827274207084	0.9490904995090851	6.447217038546234	-0.33687432336912143	PDCD6
epithelial cell development (GO:0002064)	3/107	0.6613029370713059	0.9077371064382024	3.4812656140965035	-0.33698815688997835	CDK6;AKAP9;MAP7
regulation of transforming growth factor beta receptor signaling pathway (GO:0017015)	4/103	0.4178644086673648	0.8298927222416099	1.8073760859154266	-0.3370012427417695	DAB2;SKOR2;FAM89B;STUB1
fatty acid biosynthetic process (GO:0006633)	4/111	0.4725112120110813	0.8499445106818652	2.0750638972934365	-0.3373726310385467	RNPEP;TECR;MIF;AASDHPPT
cotranslational protein targeting to membrane (GO:0006613)	4/110	0.4657755572472591	0.8466136674986534	2.0262672223347122	-0.3373953904686419	SRP72;SSR4;SRP54;SRP68
response to organophosphorus (GO:0046683)	3/118	0.7230202751887992	0.915933034582158	3.8499471839319614	-0.3380716519414856	RFC3;VGF;CARM1
DNA methylation or demethylation (GO:0044728)	1/56	0.8316388124895168	0.9498718002892311	6.575468309945493	-0.3381648317780407	CTCF
water-soluble vitamin metabolic process (GO:0006767)	2/90	0.7789710754079326	0.9312289779151578	4.755472814397996	-0.33882783555486484	GPHN;AASDHPPT
cellular response to biotic stimulus (GO:0071216)	4/132	0.6047990498136975	0.8864833455574148	2.8162747107926687	-0.33934122082578305	CTR9;DPYSL3;PDE4B;MAPK1
positive regulation of cell growth (GO:0030307)	3/107	0.6613029370713059	0.9077371064382024	3.5075837848266365	-0.33953576825612947	MAP1B;S100A9;S100A8
negative regulation of leukocyte proliferation (GO:0070664)	1/56	0.8316388124895168	0.9498718002892311	6.622244995741378	-0.34057047489540987	CASP3
cellular response to molecule of bacterial origin (GO:0071219)	4/116	0.5056853399831284	0.8598980168195873	2.2592949048482502	-0.3410213208962146	CTR9;DPYSL3;PDE4B;MAPK1
cellular response to reactive oxygen species (GO:0034614)	2/89	0.773782911930002	0.9298533798799762	4.696179974426194	-0.34154547394225954	TRAF2;PARK7
cellular carbohydrate biosynthetic process (GO:0034637)	1/56	0.8316388124895168	0.9498718002892311	6.651292979083993	-0.3420643618609496	AGL
regulation of exocytosis (GO:0017157)	4/112	0.4792150813660087	0.8499445106818652	2.105838747965774	-0.34237613592082394	NSF;CDK5;STXBP1;PFN2
internal peptidyl-lysine acetylation (GO:0018393)	3/106	0.6552277182013899	0.9059152311933655	3.4676709483565125	-0.3426389751648833	GTF3C4;LDB1;WDR5
cellular response to lipopolysaccharide (GO:0071222)	4/110	0.4657755572472591	0.8466136674986534	2.061300600093663	-0.34322882647260455	CTR9;DPYSL3;PDE4B;MAPK1
response to cAMP (GO:0051591)	2/90	0.7789710754079326	0.9312289779151578	4.827410932199831	-0.3439534324618408	VGF;CARM1
negative regulation of inflammatory response (GO:0050728)	2/89	0.773782911930002	0.9298533798799762	4.72965392124855	-0.34397997924112356	ISL1;UACA
Fc-gamma receptor signaling pathway (GO:0038094)	6/203	0.6239121863479206	0.8925584798659387	3.030111634267277	-0.344412317474235	IGHG3;VAV3;MYO10;BRK1;MAPK1;ARPC5
regulation of blood pressure (GO:0008217)	4/133	0.6105825158944644	0.8877794863005404	2.8935862408589053	-0.3444290479996373	NPR2;EPHX2;ABAT;ADH5
Fc-gamma receptor signaling pathway involved in phagocytosis (GO:0038096)	6/203	0.6239121863479206	0.8925584798659387	3.0336967713754492	-0.34481981578747356	IGHG3;VAV3;MYO10;BRK1;MAPK1;ARPC5
immune response-regulating cell surface receptor signaling pathway involved in phagocytosis (GO:0002433)	6/203	0.6239121863479206	0.8925584798659387	3.036483057969798	-0.34513651415998714	IGHG3;VAV3;MYO10;BRK1;MAPK1;ARPC5
stress-activated MAPK cascade (GO:0051403)	2/89	0.773782911930002	0.9298533798799762	4.7463604022734485	-0.34519501422926907	MAPK1;PPP2R5D
germ cell development (GO:0007281)	4/121	0.5379037105381794	0.8647703435980814	2.379340421587718	-0.34569747734679745	KIT;MAP7;YBX2;MTOR
muscle organ development (GO:0007517)	3/106	0.6552277182013899	0.9059152311933655	3.5008423180419475	-0.3459166229818481	FHL1;SRI;EMD
negative regulation of transmembrane receptor protein serine/threonine kinase signaling pathway (GO:0090101)	3/107	0.6613029370713059	0.9077371064382024	3.5739228003860584	-0.3459574163178983	SKOR2;FAM89B;STUB1
cellular response to tumor necrosis factor (GO:0071356)	2/89	0.773782911930002	0.9298533798799762	4.792751755928951	-0.3485689813594423	TRAF2;ARHGEF2
response to transition metal nanoparticle (GO:1990267)	3/106	0.6552277182013899	0.9059152311933655	3.5294051551636967	-0.348738903810955	ABAT;S100A9;S100A8
polysaccharide metabolic process (GO:0005976)	2/88	0.7684888675625283	0.9287881490612314	4.724323750448362	-0.3490075655476731	PYGB;AGL
negative regulation of cell morphogenesis involved in differentiation (GO:0010771)	2/88	0.7684888675625283	0.9287881490612314	4.725719978808069	-0.34911071137054855	GDI1;CDK5
negative regulation of phosphatase activity (GO:0010923)	3/65	0.3476843583201924	0.8159963567622832	1.7186194567912816	-0.3494733416062691	FARP1;FKBP15;TIPRL
protein localization to endoplasmic reticulum (GO:0070972)	4/118	0.5186955356562788	0.8598980168195873	2.3159780624151303	-0.34957716069585515	SRP72;SSR4;SRP54;SRP68
positive regulation of inflammatory response (GO:0050729)	2/88	0.7684888675625283	0.9287881490612314	4.734499939152763	-0.34975932750004557	S100A9;S100A8
ameboidal-type cell migration (GO:0001667)	4/123	0.5504924335199214	0.8682645208490143	2.482918517822755	-0.35073424731036557	SGPL1;KIT;ISL1;CORO1B
regulation of DNA replication (GO:0006275)	4/118	0.5186955356562788	0.8598980168195873	2.324616773956254	-0.3508811006172322	STAG2;SHC1;S100A11;ILKAP
positive regulation of Rab GTPase activity (GO:0032851)	2/88	0.7684888675625283	0.9287881490612314	4.7537586033001435	-0.3511820537662418	TBC1D5;SBF1
regulation of Rab GTPase activity (GO:0032313)	2/88	0.7684888675625283	0.9287881490612314	4.756895588786579	-0.3514137973396316	TBC1D5;SBF1
regulation of synaptic plasticity (GO:0048167)	4/120	0.5315433490547999	0.8647703435980814	2.418794266766133	-0.3514297780407469	PPP3CB;CDK5;STXBP1;KIT
positive regulation of protein secretion (GO:0050714)	3/106	0.6552277182013899	0.9059152311933655	3.560357984854817	-0.35179733870912355	MYO18A;MIF;DNM1L
negative regulation of protein serine/threonine kinase activity (GO:0071901)	4/118	0.5186955356562788	0.8598980168195873	2.350925306389873	-0.3548521494883207	PRKAR2B;PKIA;PRKAR2A;CASP3
DNA catabolic process, endonucleolytic (GO:0000737)	3/65	0.3476843583201924	0.8159963567622832	1.749030724536525	-0.3556573326692214	RAD50;CASP3;KPNA1
membrane lipid biosynthetic process (GO:0046467)	2/88	0.7684888675625283	0.9287881490612314	4.829723668300706	-0.35679394317157753	SGPL1;VAPB
regulation of endothelial cell proliferation (GO:0001936)	2/88	0.7684888675625283	0.9287881490612314	4.856482244398137	-0.35877072249378217	PDCD6;MTOR
triglyceride metabolic process (GO:0006641)	2/87	0.7630874601366203	0.9266527483469463	4.714771014588426	-0.35915419241766494	TECR;PRKACB
digestive tract development (GO:0048565)	1/54	0.8207566378327273	0.9457989781184265	6.46606358388296	-0.36032287532707485	KIT
peptide hormone secretion (GO:0030072)	1/54	0.8207566378327273	0.9457989781184265	6.49956023064279	-0.3621894836456818	VGF
regulation of stem cell proliferation (GO:0072091)	2/86	0.7575772199996977	0.9263644487957075	4.749124341792342	-0.36324887867267075	KDM1A;IRS2
regulation of kidney development (GO:0090183)	1/52	0.8091727401946069	0.9434338115766332	6.246775269788895	-0.36374390600284107	MAGED1
sensory perception of sound (GO:0007605)	4/124	0.5567189633303145	0.8689949131237181	2.5904364493659084	-0.3637439246367871	MYO1A;GPR98;CASP3;TBL1X
regulation of cartilage development (GO:0061035)	1/54	0.8207566378327273	0.9457989781184265	6.545221256347741	-0.364733954769257	CARM1
liver development (GO:0001889)	2/86	0.7575772199996977	0.9263644487957075	4.771938515768672	-0.3649938789123607	SP3;ASNS
dicarboxylic acid metabolic process (GO:0043648)	2/87	0.7630874601366203	0.9266527483469463	4.795231131313984	-0.36528335291241304	SUCLG1;GLUL
regulation of morphogenesis of a branching structure (GO:0060688)	1/53	0.8150551600013318	0.9434338115766332	6.33888973275239	-0.36910764539006385	MAGED1
regulation of excitatory postsynaptic membrane potential (GO:0060079)	1/52	0.8091727401946069	0.9434338115766332	6.349371557435694	-0.3697179922790869	CDK5
protein N-linked glycosylation (GO:0006487)	3/104	0.6428444012497119	0.8975972822017798	3.423748052146962	-0.36988041668512334	LMAN1;STT3A;MOGS
regulation of interleukin-8 production (GO:0032677)	1/52	0.8091727401946069	0.9434338115766332	6.367318109579172	-0.3707630032958148	PARK7
regulation of adaptive immune response based on somatic recombination of immune receptors built from immunoglobulin superfamily domains (GO:0002822)	3/103	0.6365365509944754	0.8975972822017798	3.436983185279151	-0.3713102580412206	PPP3CB;TRAF2;SUPT6H
maintenance of location in cell (GO:0051651)	3/103	0.6365365509944754	0.8975972822017798	3.4434960247650257	-0.3720138646577554	SEH1L;SRI;CLASP2
defense response to Gram-positive bacterium (GO:0050830)	1/52	0.8091727401946069	0.9434338115766332	6.3963320451250745	-0.3724524577404178	SEH1L
positive regulation of lipid biosynthetic process (GO:0046889)	1/52	0.8091727401946069	0.9434338115766332	6.418797350268341	-0.3737605915357662	MTOR
regulation of phagocytosis (GO:0050764)	1/52	0.8091727401946069	0.9434338115766332	6.434259031460995	-0.3746609108313212	ABCA7
blood vessel development (GO:0001568)	2/85	0.7519566923758108	0.9245913152026607	4.783336578452248	-0.375030140506378	RBM15;MAPK1
DNA biosynthetic process (GO:0071897)	1/54	0.8207566378327273	0.9457989781184265	6.731616179710131	-0.37512085459803574	RFC3
positive regulation of angiogenesis (GO:0045766)	3/101	0.6236894668498659	0.8925584798659387	3.3427049665039954	-0.37994268961139077	PDCD6;ISL1;PIK3R6
regulation of Notch signaling pathway (GO:0008593)	1/53	0.8150551600013318	0.9434338115766332	6.529557396411426	-0.38021004586590446	KIT
positive regulation of axonogenesis (GO:0050772)	1/51	0.8031036491877712	0.9426441511721095	6.442954460202079	-0.3805622916481058	MAP1B
reactive oxygen species metabolic process (GO:0072593)	2/84	0.7462244397492964	0.9205796361626917	4.607733526937646	-0.38129809593394187	EPHX2;PARK7
histone acetylation (GO:0016573)	3/101	0.6236894668498659	0.8925584798659387	3.3567795561806424	-0.38154245312941215	GTF3C4;LDB1;WDR5
unsaturated fatty acid metabolic process (GO:0033559)	3/100	0.6171507932344638	0.8912732502688764	3.32499765625044	-0.38272126284070895	EPHX2;RNPEP;MIF
regulation of protein depolymerization (GO:1901879)	3/67	0.364553934651499	0.8159963567622832	1.883253880049928	-0.38295099241038627	ARHGEF2;NES;CLASP2
positive regulation of phosphatidylinositol 3-kinase signaling (GO:0014068)	1/51	0.8031036491877712	0.9426441511721095	6.489190539172921	-0.3832932915765787	KIT
phenol-containing compound metabolic process (GO:0018958)	2/81	0.7283432696723561	0.9183598006082494	4.506091417853424	-0.383765896551054	DBH;HPRT1
regulation of glucose import (GO:0046324)	1/51	0.8031036491877712	0.9426441511721095	6.507994624521817	-0.3844039816888441	IRS2
regulation of early endosome to late endosome transport (GO:2000641)	3/11	0.008139428109004606	0.13078267537858249	0.1889875152379496	-0.3844418619620566	DAB2;MAPK1;PTPN23
mesoderm development (GO:0007498)	1/52	0.8091727401946069	0.9434338115766332	6.6101592623599	-0.38490341745124185	EPB41L5
regulation of reactive oxygen species metabolic process (GO:2000377)	2/81	0.7283432696723561	0.9183598006082494	4.524124440807282	-0.38530169744359544	ARF4;PARK7
regulation of pH (GO:0006885)	1/52	0.8091727401946069	0.9434338115766332	6.6388710781414355	-0.38657527974334616	ATP6V1H
transition metal ion transport (GO:0000041)	3/101	0.6236894668498659	0.8925584798659387	3.4013952934725222	-0.38661362255523224	ATP6V1H;FKBP4;DNM2
regulation of vasoconstriction (GO:0019229)	1/52	0.8091727401946069	0.9434338115766332	6.644500961756508	-0.38690310262283917	DBH
regulation of potassium ion transport (GO:0043266)	1/51	0.8031036491877712	0.9426441511721095	6.556371216547966	-0.38726141407290277	FHL1
post-embryonic development (GO:0009791)	2/84	0.7462244397492964	0.9205796361626917	4.680350055708239	-0.3873072420774172	SGPL1;TBCE
transcription elongation from RNA polymerase II promoter (GO:0006368)	3/67	0.364553934651499	0.8159963567622832	1.905279196747223	-0.3874297389972025	TCEB2;TCEB1;NELFA
regulation of interleukin-6 production (GO:0032675)	2/84	0.7462244397492964	0.9205796361626917	4.685186321820862	-0.38770745164886755	ARHGEF2;ISL1
lymphocyte mediated immunity (GO:0002449)	1/53	0.8150551600013318	0.9434338115766332	6.663400596056077	-0.3880036107258596	GNL1
columnar/cuboidal epithelial cell differentiation (GO:0002065)	1/51	0.8031036491877712	0.9426441511721095	6.578127474840298	-0.3885464784893224	KIT
mononuclear cell proliferation (GO:0032943)	2/83	0.7403790443775443	0.9198942779422176	4.657562975149355	-0.38889035051236764	PPP3CB;HPRT1
male gonad development (GO:0008584)	2/82	0.73441911098939	0.9186344023239151	4.584256568366669	-0.38905236335719345	RRM1;KIT
demethylation (GO:0070988)	1/52	0.8091727401946069	0.9434338115766332	6.696714086284071	-0.38994342423519485	KDM1A
digestive system process (GO:0022600)	1/51	0.8031036491877712	0.9426441511721095	6.601859399458643	-0.3899482384542212	COPA
response to calcium ion (GO:0051592)	3/100	0.6171507932344638	0.8912732502688764	3.390466363193434	-0.39025698730976816	GDI1;PDCD6;ANXA7
lymphocyte proliferation (GO:0046651)	2/81	0.7283432696723561	0.9183598006082494	4.584335212240039	-0.3904296095381819	PPP3CB;HPRT1
protein N-linked glycosylation via asparagine (GO:0018279)	3/96	0.5902377710389038	0.8860121384299264	3.2264187238601845	-0.3904761265094564	LMAN1;STT3A;MOGS
negative regulation of mononuclear cell proliferation (GO:0032945)	1/53	0.8150551600013318	0.9434338115766332	6.70860177112928	-0.3906356330520927	CASP3
negative regulation of lymphocyte proliferation (GO:0050672)	1/53	0.8150551600013318	0.9434338115766332	6.715760394984629	-0.3910524730519792	CASP3
regulation of cAMP-dependent protein kinase activity (GO:2000479)	3/11	0.008139428109004606	0.13078267537858249	0.1922429009471257	-0.391064027145109	PRKAR2B;PKIA;PRKAR2A
positive regulation of lymphocyte differentiation (GO:0045621)	2/75	0.6893814192172211	0.9147989897508119	4.401186807994571	-0.39192973950628257	SART1;AP3D1
coenzyme biosynthetic process (GO:0009108)	3/98	0.6038450081179764	0.8864833455574148	3.2534073708810225	-0.3920126203766646	TECR;GART;GPHN
TRIF-dependent toll-like receptor signaling pathway (GO:0035666)	2/76	0.6961796601668612	0.9147989897508119	4.403040776841279	-0.39209483713990795	MAPK1;PPP2R5D
cell-cell junction assembly (GO:0007043)	2/77	0.7028544849132514	0.9147989897508119	4.4148283789714355	-0.39314453396801896	PARD3;STRN
MyD88-dependent toll-like receptor signaling pathway (GO:0002755)	2/82	0.73441911098939	0.9186344023239151	4.648301793365656	-0.39448769311590215	MAPK1;PPP2R5D
cellular polysaccharide metabolic process (GO:0044264)	2/81	0.7283432696723561	0.9183598006082494	4.632146421094249	-0.39450150017014474	PYGB;AGL
positive regulation of transporter activity (GO:0032411)	1/52	0.8091727401946069	0.9434338115766332	6.781894174398306	-0.39490338143330056	PARK7
regulation of cell-matrix adhesion (GO:0001952)	2/78	0.7094070425845183	0.9152910031964097	4.46181576988275	-0.39492971648545816	EPB41L5;CDK6
peptidyl-asparagine modification (GO:0018196)	3/97	0.5970788050195638	0.8860121384299264	3.26691509027658	-0.39537718419891305	LMAN1;STT3A;MOGS
regulation of oxidoreductase activity (GO:0051341)	2/77	0.7028544849132514	0.9147989897508119	4.442211243490677	-0.3955830032778123	PARK7;DNM2
negative regulation of protein catabolic process (GO:0042177)	3/97	0.5970788050195638	0.8860121384299264	3.268847629394203	-0.39561106902712734	SERPINB12;UBXN1;PARK7
nuclear-transcribed mRNA catabolic process, deadenylation-dependent decay (GO:0000288)	1/53	0.8150551600013318	0.9434338115766332	6.8012967327932765	-0.39603317433799606	EDC3
epidermal cell differentiation (GO:0009913)	2/76	0.6961796601668612	0.9147989897508119	4.4478139224412425	-0.39608192699939665	CASP3;LOR
regulation of tumor necrosis factor production (GO:0032680)	2/78	0.7094070425845183	0.9152910031964097	4.489382168436357	-0.3973697074054749	ARHGEF2;ISL1
negative regulation of immune effector process (GO:0002698)	2/81	0.7283432696723561	0.9183598006082494	4.668206590280757	-0.39757260145823964	PPM1B;PPP3CB
multi-organism behavior (GO:0051705)	3/77	0.44730473563414413	0.8426322540187647	2.322963114351623	-0.39774854856760994	PPP3CB;ANXA7;DBH
regulation of JAK-STAT cascade (GO:0046425)	2/76	0.6961796601668612	0.9147989897508119	4.467469954671405	-0.39783231477609843	KIT;ISL1
maintenance of protein location in cell (GO:0032507)	3/93	0.5692721557756019	0.878984186498818	3.089137101579414	-0.39846276496897226	SEH1L;SRI;CLASP2
MyD88-independent toll-like receptor signaling pathway (GO:0002756)	2/79	0.7158385281913004	0.9152910031964097	4.504631629303352	-0.39871948641190763	MAPK1;PPP2R5D
regulation of viral transcription (GO:0046782)	3/76	0.43919890725866234	0.8426322540187647	2.328739156775538	-0.39873754941587286	TCEB2;TCEB1;NELFA
cellular response to hypoxia (GO:0071456)	3/99	0.6105358324451416	0.8877794863005404	3.350959963892185	-0.39887110809100745	TCEB2;TCEB1;MTOR
regulation of steroid metabolic process (GO:0019218)	2/77	0.7028544849132514	0.9147989897508119	4.494265190427623	-0.4002184552032368	EPHX2;STUB1
meiotic cell cycle process (GO:1903046)	3/93	0.5692721557756019	0.878984186498818	3.1051244027272533	-0.40052494091334934	NDC1;RAD50;PSMD13
toll-like receptor 3 signaling pathway (GO:0034138)	2/80	0.7221501787809497	0.9152910031964097	4.525377529200066	-0.40055577297930667	MAPK1;PPP2R5D
ovulation cycle process (GO:0022602)	3/78	0.4553633608125638	0.8455245664600445	2.389098453616539	-0.40088607497333417	SGPL1;VGF;KIT
regulation of interferon-gamma production (GO:0032649)	2/79	0.7158385281913004	0.9152910031964097	4.537998658443602	-0.401672909869521	PDE4B;ISL1
regulation of tumor necrosis factor superfamily cytokine production (GO:1903555)	2/80	0.7221501787809497	0.9152910031964097	4.5458701963128645	-0.40236964509556866	ARHGEF2;ISL1
regulation of circadian rhythm (GO:0042752)	2/76	0.6961796601668612	0.9147989897508119	4.539136274053834	-0.40421426653418063	MAGED1;CSNK1D
nicotinamide nucleotide metabolic process (GO:0046496)	1/53	0.8150551600013318	0.9434338115766332	6.945336920829112	-0.40442050033496746	TKT
pyridine nucleotide metabolic process (GO:0019362)	1/53	0.8150551600013318	0.9434338115766332	6.95703618720172	-0.40510173771969	TKT
sodium ion transmembrane transport (GO:0035725)	2/82	0.73441911098939	0.9186344023239151	4.774429534479428	-0.40519178330662653	TRAPPC10;SLC3A2
positive regulation of epithelial cell migration (GO:0010634)	2/79	0.7158385281913004	0.9152910031964097	4.5790635308879715	-0.40530769428653707	EPB41L5;PDCD6
neuromuscular process (GO:0050905)	2/79	0.7158385281913004	0.9152910031964097	4.582100885310743	-0.4055765403310439	RBFOX1;HERC1
alcohol catabolic process (GO:0046164)	1/51	0.8031036491877712	0.9426441511721095	6.876619485257528	-0.40617733467877754	ADH5
B cell differentiation (GO:0030183)	2/80	0.7221501787809497	0.9152910031964097	4.590248051258704	-0.4062976722880616	SP3;KIT
adherens junction organization (GO:0034332)	3/69	0.3813512694159275	0.8160154184847576	1.9999725812443387	-0.4066384831522331	ARHGEF7;MLLT4;FERMT2
regulation of lymphocyte mediated immunity (GO:0002706)	3/95	0.5833225194729321	0.8810245594163669	3.2167800018042203	-0.40746880447312706	PPP3CB;TRAF2;SUPT6H
negative regulation of DNA metabolic process (GO:0051053)	2/80	0.7221501787809497	0.9152910031964097	4.606902024327231	-0.4077717692032022	STAG2;S100A11
regulation of production of molecular mediator of immune response (GO:0002700)	3/79	0.46337250501584354	0.8455245664600445	2.4323528572289628	-0.4081440797923688	TRAF2;MIF;SUPT6H
myeloid leukocyte differentiation (GO:0002573)	3/83	0.49487243832823125	0.8557884893599552	2.6360591615220073	-0.4105188318811068	KDM1A;KIT;SP3
regulation of defense response to virus (GO:0050688)	3/77	0.44730473563414413	0.8426322540187647	2.3987771398926077	-0.4107297786326474	PPM1B;ATP6V1H;ZC3HAV1
axis specification (GO:0009798)	3/78	0.4553633608125638	0.8455245664600445	2.4500099415750856	-0.41110690421187945	EPB41L5;LDB1;RNF2
regulation of cell junction assembly (GO:1901888)	1/50	0.7968419767233724	0.9391705685044639	6.56318502324454	-0.41189346285995615	EPB41L5
canonical Wnt signaling pathway (GO:0060070)	3/84	0.502603702889289	0.8598980168195873	2.7294065482912333	-0.4119806689970702	TBL1XR1;DVL2;TBL1X
positive regulation of type I interferon production (GO:0032481)	3/77	0.44730473563414413	0.8426322540187647	2.4073353768025063	-0.41219515976081916	DHX36;ZC3HAV1;TRIM56
toll-like receptor 2 signaling pathway (GO:0034134)	2/73	0.6754103465017027	0.909932271648907	4.375406107415283	-0.41297318236981373	MAPK1;PPP2R5D
leukocyte mediated immunity (GO:0002443)	3/70	0.389714288627618	0.8160154184847576	2.035114131351509	-0.4137835344220395	KIT;DBH;GNL1
regulation of leukocyte apoptotic process (GO:2000106)	2/71	0.6609331525406509	0.9077371064382024	4.281455343334445	-0.41444690089568914	IRS2;MIF
regulation of lipid transport (GO:0032368)	3/83	0.49487243832823125	0.8557884893599552	2.6617325393049036	-0.41451699899803596	ABCA7;IRS2;MIF
receptor metabolic process (GO:0043112)	3/71	0.398049226052759	0.823909751742392	2.140255920771901	-0.41455532885211044	CDK5;SCYL2;DNM2
eye development (GO:0001654)	2/79	0.7158385281913004	0.9152910031964097	4.684619690267626	-0.41465081068737314	ABI2;NES
cardiac muscle tissue morphogenesis (GO:0055008)	1/50	0.7968419767233724	0.9391705685044639	6.616124885794006	-0.41521587160382084	ISL1
toll-like receptor 9 signaling pathway (GO:0034162)	2/73	0.6754103465017027	0.909932271648907	4.4009472880601015	-0.4153838894889762	MAPK1;PPP2R5D
intracellular steroid hormone receptor signaling pathway (GO:0030518)	2/73	0.6754103465017027	0.909932271648907	4.401167264850949	-0.41540465202235793	CARM1;FKBP4
monocarboxylic acid catabolic process (GO:0072329)	3/82	0.48708187541604986	0.8557884893599552	2.66857376734165	-0.4155823972953397	ABCD3;ABAT;IDNK
negative regulation of cysteine-type endopeptidase activity (GO:2000117)	2/71	0.6609331525406509	0.9077371064382024	4.293696264217273	-0.4156318278229069	GPI;PARK7
epithelial cell proliferation (GO:0050673)	2/73	0.6754103465017027	0.909932271648907	4.422640735639602	-0.41743142790336385	KIT;MAPK1
wound healing (GO:0042060)	3/75	0.4310482631400881	0.8390836826628408	2.3810235072829253	-0.417738280013691	SCRIB;S100A8;CORO1B
toll-like receptor TLR6:TLR2 signaling pathway (GO:0038124)	2/71	0.6609331525406509	0.9077371064382024	4.315679963041579	-0.41775986025985445	MAPK1;PPP2R5D
organophosphate ester transport (GO:0015748)	2/71	0.6609331525406509	0.9077371064382024	4.316658989513633	-0.41785463048509325	PITPNM3;ABCA7
negative regulation of chromosome organization (GO:2001251)	3/80	0.4713299980592553	0.8499445106818652	2.570798361763727	-0.41797122889038735	KDM1A;CTBP1;SUPT6H
toll-like receptor TLR1:TLR2 signaling pathway (GO:0038123)	2/71	0.6609331525406509	0.9077371064382024	4.3192046670231665	-0.41810105327124897	MAPK1;PPP2R5D
cellular response to carbohydrate stimulus (GO:0071322)	1/50	0.7968419767233724	0.9391705685044639	6.663072207557642	-0.41816219947127214	IRS2
smoothened signaling pathway (GO:0007224)	2/72	0.6682354838279533	0.9097471115398272	4.433597931998261	-0.4193678989351167	TROVE2;SEPT2
phosphatidylinositol biosynthetic process (GO:0006661)	3/81	0.4792337752883348	0.8499445106818652	2.5809391725360395	-0.41961996463080553	ARF3;VAC14;PIK3R6
regulation of fatty acid metabolic process (GO:0019217)	2/72	0.6682354838279533	0.9097471115398272	4.439709596936915	-0.41994599287228246	IRS2;MTOR
cell-type specific apoptotic process (GO:0097285)	3/86	0.5178817738415097	0.8598980168195873	2.782397837090934	-0.41997925265416053	CDK5;CASP3;STK3
negative regulation of dephosphorylation (GO:0035305)	3/70	0.389714288627618	0.8160154184847576	2.0661265245687503	-0.42008903713494844	FARP1;FKBP15;TIPRL
negative regulation of wound healing (GO:0061045)	1/50	0.7968419767233724	0.9391705685044639	6.703355716980094	-0.4206903186898224	VTN
cytokinesis (GO:0000910)	3/79	0.46337250501584354	0.8455245664600445	2.5123286793303556	-0.4215638672299521	CUL7;SEPT6;SNX9
endothelial cell migration (GO:0043542)	1/50	0.7968419767233724	0.9391705685044639	6.725134612443855	-0.4220571222521268	CORO1B
positive regulation of lyase activity (GO:0051349)	1/50	0.7968419767233724	0.9391705685044639	6.725600536674325	-0.4220863628028714	PARK7
positive regulation of blood circulation (GO:1903524)	2/72	0.6682354838279533	0.9097471115398272	4.47689025899906	-0.4234628602944464	EPHX2;DBH
protein heterooligomerization (GO:0051291)	3/81	0.4792337752883348	0.8499445106818652	2.610473220172479	-0.4244217345277806	RRM1;TRAF2;SQSTM1
protein stabilization (GO:0050821)	3/91	0.5549340080317231	0.8682645208490143	3.007047406485213	-0.4247720983067181	COG7;STXBP1;PARK7
regulation of receptor activity (GO:0010469)	3/87	0.5254255325508709	0.8598980168195873	2.8174323355214934	-0.425267411763486	CDK5;SHC1;PARK7
positive regulation of muscle cell differentiation (GO:0051149)	2/70	0.6535024987204416	0.9059152311933655	4.304252783074702	-0.42530124236334765	CTNNA2;MTOR
regulation of glucose transport (GO:0010827)	3/90	0.5476593040925987	0.8682645208490143	3.015721615131368	-0.4259974071594589	C2CD5;SEH1L;IRS2
regulation of protein complex disassembly (GO:0043244)	3/80	0.4713299980592553	0.8499445106818652	2.6210005914935737	-0.4261333189108687	ARHGEF2;NES;CLASP2
negative regulation of homeostatic process (GO:0032845)	3/86	0.5178817738415097	0.8598980168195873	2.8254428173945048	-0.4264765257678098	LDB1;MIF;CHERP
memory (GO:0007613)	3/90	0.5476593040925987	0.8682645208490143	3.0212612389401023	-0.4267799281213802	PPP3CB;ABCA7;DBH
leukocyte proliferation (GO:0070661)	3/89	0.540315555168657	0.8647703435980814	2.940256801358609	-0.42719375073835447	PPP3CB;KIT;HPRT1
pyruvate metabolic process (GO:0006090)	3/71	0.398049226052759	0.823909751742392	2.206763268122274	-0.42743742158893216	GPI;PPP2R5D;ENO2
response to amino acid (GO:0043200)	3/86	0.5178817738415097	0.8598980168195873	2.8391432505670955	-0.42854448945300255	ASNS;MTOR;CPEB4
icosanoid metabolic process (GO:0006690)	3/88	0.5329038930525996	0.8647703435980814	2.955584634312844	-0.42942075160691295	EPHX2;RNPEP;MIF
fatty acid derivative metabolic process (GO:1901568)	3/88	0.5329038930525996	0.8647703435980814	2.958317882762195	-0.42981786884382867	EPHX2;RNPEP;MIF
RNA modification (GO:0009451)	3/89	0.540315555168657	0.8647703435980814	2.958938011135617	-0.42990796810511056	METTL14;RNMT;GAR1
regulation of cell killing (GO:0031341)	1/50	0.7968419767233724	0.9391705685044639	6.873127316750671	-0.431344873129034	PPP3CB
cellular glucose homeostasis (GO:0001678)	1/49	0.7903816259326659	0.9362915149658652	6.553403865574068	-0.4314001131828027	IRS2
positive regulation of Wnt signaling pathway (GO:0030177)	3/86	0.5178817738415097	0.8598980168195873	2.8648740020352377	-0.43242832720897156	DAB2;DVL2;CSNK1D
response to heat (GO:0009408)	2/70	0.6535024987204416	0.9059152311933655	4.378775856005612	-0.4326648330025595	PDCD6;DNAJA2
DNA-templated transcription, elongation (GO:0006354)	3/90	0.5476593040925987	0.8682645208490143	3.088488242373761	-0.43627633820450756	TCEB2;TCEB1;NELFA
protein targeting to mitochondrion (GO:0006626)	1/49	0.7903816259326659	0.9362915149658652	6.64994885228834	-0.43775551551266056	TOMM70A
negative regulation of transforming growth factor beta receptor signaling pathway (GO:0030512)	3/73	0.4146226376660203	0.8254075243338662	2.296603689122085	-0.4406678276629862	SKOR2;FAM89B;STUB1
regulation of response to oxidative stress (GO:1902882)	1/49	0.7903816259326659	0.9362915149658652	6.80449188717674	-0.4479288367530461	PARK7
glutathione metabolic process (GO:0006749)	1/49	0.7903816259326659	0.9362915149658652	6.805902882596356	-0.4480217203286976	GGCT
negative regulation of cysteine-type endopeptidase activity involved in apoptotic process (GO:0043154)	2/69	0.6459427423602816	0.9005201761140397	4.327969613354129	-0.4534963812498897	GPI;PARK7
stem cell proliferation (GO:0072089)	1/48	0.7837163072245167	0.9340027368790788	6.736714939646566	-0.4599553461499446	NES
regulation of protein localization to plasma membrane (GO:1903076)	1/48	0.7837163072245167	0.9340027368790788	6.787270430759877	-0.4634070683354797	DAB2
organelle fusion (GO:0048284)	1/49	0.7903816259326659	0.9362915149658652	7.040505647323453	-0.4634652457594933	VAV3
vasculogenesis (GO:0001570)	2/67	0.6304332041803626	0.8967450528266266	4.30298358206909	-0.46895498302527455	CUL7;SGPL1
natural killer cell activation (GO:0030101)	1/48	0.7837163072245167	0.9340027368790788	6.869806531933387	-0.46904229579058704	SP3
cellular monovalent inorganic cation homeostasis (GO:0030004)	1/48	0.7837163072245167	0.9340027368790788	6.874713699455809	-0.4693773371210593	ATP6V1H
intrinsic apoptotic signaling pathway by p53 class mediator (GO:0072332)	1/48	0.7837163072245167	0.9340027368790788	6.891942117106697	-0.47055362302230686	HINT1
multicellular organismal response to stress (GO:0033555)	2/66	0.622482282389706	0.8925584798659387	4.193771166749698	-0.47667763463314206	GIT2;DBH
toll-like receptor 5 signaling pathway (GO:0034146)	2/65	0.6143999905226764	0.8910523064999958	4.197861243072924	-0.48423231075306644	MAPK1;PPP2R5D
toll-like receptor 10 signaling pathway (GO:0034166)	2/65	0.6143999905226764	0.8910523064999958	4.200272917625151	-0.4845105025925743	MAPK1;PPP2R5D
regulation of extent of cell growth (GO:0061387)	2/62	0.5893622318786341	0.8860121384299264	4.022793093840212	-0.4868570385533717	CDK5;MAP1B
epithelial cell migration (GO:0010631)	2/65	0.6143999905226764	0.8910523064999958	4.224558122558783	-0.48731185314257863	KIT;CORO1B
regulation of synaptic transmission, glutamatergic (GO:0051966)	1/47	0.7768395325579547	0.9298533798799762	6.701689360145217	-0.48740288515119584	GLUL
regulation of peptidyl-threonine phosphorylation (GO:0010799)	2/27	0.22341523448415565	0.7919746414988059	2.092317438754786	-0.48798263027204514	PARD3;MAPK1
negative regulation of synaptic transmission (GO:0050805)	1/47	0.7768395325579547	0.9298533798799762	6.712811477738135	-0.48821177853799136	STXBP1
positive regulation of lipid kinase activity (GO:0090218)	2/26	0.21202896799290852	0.7919746414988059	2.1098724666575315	-0.4920769175593409	VAV3;KIT
regulation of cation channel activity (GO:2001257)	2/62	0.5893622318786341	0.8860121384299264	4.067468863425114	-0.4922639069574424	PDE4B;SRI
organic hydroxy compound catabolic process (GO:1901616)	2/66	0.622482282389706	0.8925584798659387	4.338383674443369	-0.49311476135391435	DBH;ADH5
regulation of alpha-beta T cell activation (GO:0046634)	2/63	0.5978401173161142	0.8860121384299264	4.088703287428566	-0.4948337952277432	HSPH1;AP3D1
acid secretion (GO:0046717)	1/47	0.7768395325579547	0.9298533798799762	6.819019531508781	-0.4959361162463247	STXBP1
positive regulation of T cell differentiation (GO:0045582)	2/63	0.5978401173161142	0.8860121384299264	4.099142600252248	-0.4960972091810118	SART1;AP3D1
regulation of smoothened signaling pathway (GO:0008589)	2/63	0.5978401173161142	0.8860121384299264	4.113598025792974	-0.4978466716827155	SKOR2;PRKACB
keratinization (GO:0031424)	1/47	0.7768395325579547	0.9298533798799762	6.87927925209161	-0.5003187069771251	LOR
negative regulation of coagulation (GO:0050819)	1/47	0.7768395325579547	0.9298533798799762	6.883588386215627	-0.5006321032406165	VTN
fatty acid beta-oxidation (GO:0006635)	1/47	0.7768395325579547	0.9298533798799762	6.89074983767185	-0.5011529438696064	ABCD3
positive regulation of stem cell proliferation (GO:2000648)	2/64	0.6061860059247752	0.8864833455574148	4.160232022619589	-0.5012785890751759	KDM1A;IRS2
regulation of neuronal synaptic plasticity (GO:0048168)	1/47	0.7768395325579547	0.9298533798799762	6.901047165096218	-0.5019018516190212	KIT
regulation of amine transport (GO:0051952)	2/60	0.5720107390432949	0.8803022412549408	3.939059524485881	-0.5021905983537777	DPYSL2;SEPT2
positive regulation of epithelial to mesenchymal transition (GO:0010718)	2/26	0.21202896799290852	0.7919746414988059	2.155069375152891	-0.5026180074911136	EPB41L5;DAB2
regulation of neurotransmitter transport (GO:0051588)	2/63	0.5978401173161142	0.8860121384299264	4.166587926144233	-0.5042597546716855	STXBP1;PFN2
negative regulation of developmental growth (GO:0048640)	1/46	0.7697446087683976	0.9287881490612314	6.831007305194596	-0.5046379875210874	CDK5
formation of primary germ layer (GO:0001704)	1/46	0.7697446087683976	0.9287881490612314	6.842958364467532	-0.5055208673411181	TNRC6C
regulation of synapse organization (GO:0050807)	2/64	0.6061860059247752	0.8864833455574148	4.195462712405601	-0.5055236384791649	CTNNA2;PDLIM5
developmental programmed cell death (GO:0010623)	2/27	0.22341523448415565	0.7919746414988059	2.1799607726409644	-0.5084233262216241	KIT;SCRIB
positive regulation of endothelial cell proliferation (GO:0001938)	2/63	0.5978401173161142	0.8860121384299264	4.203228192852696	-0.5086941293276435	PDCD6;MTOR
recombinational repair (GO:0000725)	2/62	0.5893622318786341	0.8860121384299264	4.206355143226968	-0.5090725673341253	RAD50;RPA1
single-organism membrane fusion (GO:0044801)	2/62	0.5893622318786341	0.8860121384299264	4.230336364634374	-0.5119748857390116	NSF;VAV3
polysaccharide biosynthetic process (GO:0000271)	1/47	0.7768395325579547	0.9298533798799762	7.040858219160659	-0.5120700804737173	AGL
regulation of chromosome segregation (GO:0051983)	2/63	0.5978401173161142	0.8860121384299264	4.23694588339105	-0.5127748002891945	CUL3;CTCF
negative regulation of cellular protein catabolic process (GO:1903363)	2/64	0.6061860059247752	0.8864833455574148	4.256917834830306	-0.5129285468816296	UBXN1;PARK7
sphingolipid biosynthetic process (GO:0030148)	2/63	0.5978401173161142	0.8860121384299264	4.23940411804498	-0.5130723072242429	SGPL1;VAPB
histone H4 acetylation (GO:0043967)	1/47	0.7768395325579547	0.9298533798799762	7.067108172891889	-0.5139791965929714	WDR5
dopamine metabolic process (GO:0042417)	2/28	0.23484682609126678	0.7919746414988059	2.208086614859993	-0.5149830012548859	HPRT1;DBH
positive regulation of cytokine production involved in immune response (GO:0002720)	2/27	0.22341523448415565	0.7919746414988059	2.2143243433493467	-0.5164378011331345	TRAF2;MIF
neural precursor cell proliferation (GO:0061351)	1/47	0.7768395325579547	0.9298533798799762	7.110939451764898	-0.5171669736793907	RRM1
cellular glucan metabolic process (GO:0006073)	2/60	0.5720107390432949	0.8803022412549408	4.06396028434358	-0.5181141930437986	PYGB;AGL
glucan metabolic process (GO:0044042)	2/60	0.5720107390432949	0.8803022412549408	4.067813288282836	-0.5186054124177853	PYGB;AGL
regulation of neurological system process (GO:0031644)	1/47	0.7768395325579547	0.9298533798799762	7.131529396261817	-0.5186644466020515	PARD3
positive regulation of mitochondrion organization (GO:0010822)	2/64	0.6061860059247752	0.8864833455574148	4.31515857022591	-0.5199461443394334	DYNLL1;DNM1L
respiratory gaseous exchange (GO:0007585)	1/46	0.7697446087683976	0.9287881490612314	7.043640800524633	-0.5203462036550865	ADH5
meiotic nuclear division (GO:0007126)	2/64	0.6061860059247752	0.8864833455574148	4.32250396738572	-0.5208312128414896	PSMD13;RPA1
establishment of spindle localization (GO:0051293)	2/26	0.21202896799290852	0.7919746414988059	2.235617599134306	-0.5214039400050563	DYNLT1;ARHGEF2
negative regulation of lymphocyte apoptotic process (GO:0070229)	2/27	0.22341523448415565	0.7919746414988059	2.2451653475186633	-0.5236307222721616	IRS2;MIF
double-strand break repair via homologous recombination (GO:0000724)	2/61	0.5807523831633273	0.8807826499944906	4.127562383932718	-0.5239708963447898	RAD50;RPA1
positive regulation of tyrosine phosphorylation of Stat3 protein (GO:0042517)	2/27	0.22341523448415565	0.7919746414988059	2.248877781530812	-0.5244965580580726	KIT;ISL1
mesonephric epithelium development (GO:0072163)	1/45	0.76242463148456	0.926639167496619	6.884253966818542	-0.5245184471147066	SMAD9
negative regulation of proteolysis involved in cellular protein catabolic process (GO:1903051)	2/61	0.5807523831633273	0.8807826499944906	4.133013271400871	-0.5246628559390725	UBXN1;PARK7
stem cell division (GO:0017145)	2/26	0.21202896799290852	0.7919746414988059	2.2539876917238137	-0.5256883214923624	CUL3;KIT
glycosphingolipid metabolic process (GO:0006687)	2/61	0.5807523831633273	0.8807826499944906	4.1437373781748725	-0.5260242211508362	KIT;MAP7
regulation of vascular endothelial growth factor receptor signaling pathway (GO:0030947)	2/28	0.23484682609126678	0.7919746414988059	2.2556181053961293	-0.5260685761982266	VTN;PDCD6
cellular polysaccharide biosynthetic process (GO:0033692)	1/46	0.7697446087683976	0.9287881490612314	7.129999238917038	-0.5267258994464623	AGL
regulation of interleukin-12 production (GO:0032655)	1/45	0.76242463148456	0.926639167496619	6.9156047845101405	-0.5269070984181932	ISL1
acyl-CoA metabolic process (GO:0006637)	2/60	0.5720107390432949	0.8803022412549408	4.134432317638478	-0.5270986707719413	TECR;SUCLG1
thioester metabolic process (GO:0035383)	2/60	0.5720107390432949	0.8803022412549408	4.1390223006287155	-0.5276838475863491	TECR;SUCLG1
glycogen metabolic process (GO:0005977)	2/59	0.5631376101177579	0.8770883697562449	4.0458420566131394	-0.5306021843876427	PYGB;AGL
positive regulation of canonical Wnt signaling pathway (GO:0090263)	2/59	0.5631376101177579	0.8770883697562449	4.056987926315926	-0.5320639376465303	DVL2;CSNK1D
regulation of metaphase/anaphase transition of cell cycle (GO:1902099)	1/45	0.76242463148456	0.926639167496619	7.002665335971927	-0.5335403320957691	CUL3
regulation of cellular response to insulin stimulus (GO:1900076)	1/45	0.76242463148456	0.926639167496619	7.017010005547249	-0.5346332673428251	OSBPL8
cellular response to amino acid stimulus (GO:0071230)	1/45	0.76242463148456	0.926639167496619	7.038216591690957	-0.5362490191274506	CPEB4
negative regulation of autophagy (GO:0010507)	2/26	0.21202896799290852	0.7919746414988059	2.2999465022909806	-0.5364071067251079	HERC1;MTOR
negative regulation of extrinsic apoptotic signaling pathway via death domain receptors (GO:1902042)	2/26	0.21202896799290852	0.7919746414988059	2.302978888292745	-0.5371143376976806	PARK7;ARHGEF2
cellular response to ionizing radiation (GO:0071479)	1/45	0.76242463148456	0.926639167496619	7.064519295814518	-0.5382530494244595	FIGNL1
eye morphogenesis (GO:0048592)	1/45	0.76242463148456	0.926639167496619	7.090888276642856	-0.5402621294123189	SP3
regulation of cellular response to oxidative stress (GO:1900407)	1/45	0.76242463148456	0.926639167496619	7.10395057069035	-0.5412573591383824	PARK7
sulfur amino acid metabolic process (GO:0000096)	1/45	0.76242463148456	0.926639167496619	7.115029735829546	-0.5421014922168753	CBS
positive regulation of phosphatidylinositol 3-kinase activity (GO:0043552)	2/25	0.200702336985382	0.7732397021436282	2.1119628832568047	-0.5431254378324146	VAV3;KIT
mesonephric tubule development (GO:0072164)	1/44	0.7548724782730687	0.9245913152026607	6.96879459732754	-0.546377611972581	SMAD9
negative regulation of protein kinase B signaling (GO:0051898)	2/28	0.23484682609126678	0.7919746414988059	2.3427503511233527	-0.5463900731488925	PKHD1;PDCD6
regulation of humoral immune response (GO:0002920)	1/45	0.76242463148456	0.926639167496619	7.179573330622123	-0.547019135620936	VTN
neuron-neuron synaptic transmission (GO:0007270)	2/58	0.5541334586513915	0.8682645208490143	3.874323162499543	-0.5472824857047506	CDK5;KIF1B
branching involved in ureteric bud morphogenesis (GO:0001658)	1/44	0.7548724782730687	0.9245913152026607	6.986399191422196	-0.5477578730703715	PBX1
protein localization to mitochondrion (GO:0070585)	2/58	0.5541334586513915	0.8682645208490143	3.88661028392705	-0.5490181505099196	TOMM70A;DNM1L
regulation of tyrosine phosphorylation of STAT protein (GO:0042509)	2/53	0.5071753581715692	0.8598980168195873	3.6525145044120197	-0.5513159518105636	KIT;ISL1
excretion (GO:0007588)	1/45	0.76242463148456	0.926639167496619	7.247962539036751	-0.5522297803138745	DAB2
negative regulation of transmembrane transport (GO:0034763)	2/51	0.4875109166982658	0.8557884893599552	3.548105852957203	-0.5525537102534218	IRS2;SRI
positive regulation of nuclear division (GO:0051785)	2/55	0.5263419631938782	0.8598980168195873	3.6665003460211105	-0.5534269954680969	RANBP1;CUL3
retina development in camera-type eye (GO:0060041)	2/58	0.5541334586513915	0.8682645208490143	3.9208992009932926	-0.5538617639559469	RRM1;PFDN5
regulation of protein tyrosine kinase activity (GO:0061097)	2/53	0.5071753581715692	0.8598980168195873	3.676617473460229	-0.5549540896759225	SHC1;DVL2
pyrimidine ribonucleoside biosynthetic process (GO:0046132)	2/26	0.21202896799290852	0.7919746414988059	2.3803292298576073	-0.5551544411877736	NME7;CTPS2
connective tissue development (GO:0061448)	1/44	0.7548724782730687	0.9245913152026607	7.094656924591024	-0.5562456539771344	CREB5
regulation of axon extension (GO:0030516)	2/51	0.4875109166982658	0.8557884893599552	3.5745846641618284	-0.5566773091483143	CDK5;MAP1B
determination of bilateral symmetry (GO:0009855)	2/53	0.5071753581715692	0.8598980168195873	3.6911722058049907	-0.5571510025441144	NME7;DPCD
spermatid development (GO:0007286)	2/58	0.5541334586513915	0.8682645208490143	3.954382604834111	-0.5585915915194372	KIT;YBX2
cytoskeleton-dependent cytokinesis (GO:0061640)	2/27	0.22341523448415565	0.7919746414988059	2.4014651534824907	-0.5600838861241202	CUL7;SNX9
positive regulation of interleukin-6 production (GO:0032755)	2/51	0.4875109166982658	0.8557884893599552	3.5985337216147593	-0.5604069443680921	ARHGEF2;ISL1
positive regulation of extrinsic apoptotic signaling pathway (GO:2001238)	2/57	0.544998907782831	0.8678482047784833	3.953933487834121	-0.5604244391682551	TRAF2;STK3
regulation of mitotic metaphase/anaphase transition (GO:0030071)	1/44	0.7548724782730687	0.9245913152026607	7.151661008635419	-0.5607149714290801	CUL3
neurotransmitter secretion (GO:0007269)	2/57	0.544998907782831	0.8678482047784833	3.9585688522140394	-0.561081448571916	STXBP1;ABAT
cell fate determination (GO:0001709)	1/44	0.7548724782730687	0.9245913152026607	7.1672478742943895	-0.5619370356351555	ISL1
positive regulation of JAK-STAT cascade (GO:0046427)	2/56	0.535734751180091	0.8647703435980814	3.87930153730893	-0.5636287868468888	KIT;ISL1
pyrimidine ribonucleotide biosynthetic process (GO:0009220)	2/27	0.22341523448415565	0.7919746414988059	2.4185709497400554	-0.5640734009539693	NME7;CTPS2
specification of symmetry (GO:0009799)	2/54	0.5168217095063526	0.8598980168195873	3.750478549815761	-0.5661027899927904	NME7;DPCD
camera-type eye development (GO:0043010)	2/58	0.5541334586513915	0.8682645208490143	4.008145211439372	-0.5661860362125615	ABI2;NES
keratinocyte differentiation (GO:0030216)	2/54	0.5168217095063526	0.8598980168195873	3.7535937462538187	-0.5665730023594353	CASP3;LOR
epithelial to mesenchymal transition (GO:0001837)	2/50	0.47749668168769016	0.8499445106818652	3.4946152501085734	-0.5681692708038266	EPB41L5;CUL7
regulation of leukocyte mediated cytotoxicity (GO:0001910)	1/44	0.7548724782730687	0.9245913152026607	7.256214597656888	-0.5689123346164842	PPP3CB
regulation of alternative mRNA splicing, via spliceosome (GO:0000381)	2/28	0.23484682609126678	0.7919746414988059	2.4434981612465654	-0.5698870724413769	RBM15B;RBM11
DNA geometric change (GO:0032392)	2/57	0.544998907782831	0.8678482047784833	4.027461561004875	-0.5708461949455418	RAD50;MCM5
positive regulation of alpha-beta T cell activation (GO:0046635)	2/48	0.45711569178367023	0.8455245664600445	3.4084821118119493	-0.5719366706519282	HSPH1;AP3D1
negative regulation of transporter activity (GO:0032410)	1/43	0.7470808017804121	0.9205796361626917	6.922056076962665	-0.5728123787245114	SRI
regulation of epithelial to mesenchymal transition (GO:0010717)	2/52	0.49740449117862373	0.8557884893599552	3.679957217339134	-0.5730871902595186	EPB41L5;DAB2
positive regulation of tumor necrosis factor superfamily cytokine production (GO:1903557)	2/46	0.43628319142701333	0.8426322540187647	3.3486962582180673	-0.573379348157144	ARHGEF2;ISL1
regulation of striated muscle contraction (GO:0006942)	2/54	0.5168217095063526	0.8598980168195873	3.803778478940438	-0.5741479602778944	PDE4B;SRI
unsaturated fatty acid biosynthetic process (GO:0006636)	2/51	0.4875109166982658	0.8557884893599552	3.690008502645275	-0.5746524972765275	RNPEP;MIF
regulation of hematopoietic progenitor cell differentiation (GO:1901532)	2/25	0.200702336985382	0.7732397021436282	2.2352650082861825	-0.5748345749451738	KDM1A;PRMT1
positive regulation of production of molecular mediator of immune response (GO:0002702)	2/52	0.49740449117862373	0.8557884893599552	3.6943843422016656	-0.5753339556327774	TRAF2;MIF
positive regulation of mRNA metabolic process (GO:1903313)	2/26	0.21202896799290852	0.7919746414988059	2.4671809158275444	-0.5754105043348621	TNRC6C;ZC3HAV1
positive regulation of interferon-gamma production (GO:0032729)	2/52	0.49740449117862373	0.8557884893599552	3.7029479133751924	-0.5766675779149334	PDE4B;ISL1
regulation of neurotransmitter secretion (GO:0046928)	2/51	0.4875109166982658	0.8557884893599552	3.7044342661041774	-0.576899050635642	STXBP1;PFN2
B cell receptor signaling pathway (GO:0050853)	2/33	0.2922391285413727	0.8069204675453048	2.6952125444001545	-0.5782044020926201	VAV3;MAPK1
DNA duplex unwinding (GO:0032508)	2/55	0.5263419631938782	0.8598980168195873	3.840898497955972	-0.579750910954765	RAD50;MCM5
pyrimidine nucleoside triphosphate metabolic process (GO:0009147)	2/26	0.21202896799290852	0.7919746414988059	2.489711244538103	-0.5806651606606323	NME7;CTPS2
smooth muscle contraction (GO:0006939)	2/47	0.44675434697824656	0.8426322540187647	3.395948555563431	-0.5814701062795989	DPYSL3;RAP1GDS1
skeletal muscle cell differentiation (GO:0035914)	2/47	0.44675434697824656	0.8426322540187647	3.4019017875680633	-0.582489446351983	EMD;LEMD2
T cell homeostasis (GO:0043029)	2/25	0.200702336985382	0.7732397021436282	2.26538992440577	-0.5825816847011391	PPP3CB;CASP3
regulation of hormone metabolic process (GO:0032350)	2/30	0.2577928023338485	0.7919746414988059	2.4996840793493362	-0.5829910840947697	KDM1A;STUB1
negative regulation of ion transmembrane transport (GO:0034766)	2/45	0.42570567704852835	0.8373355170710431	3.2874323779698638	-0.5836192905557473	IRS2;SRI
regulation of dendritic spine development (GO:0060998)	2/34	0.30368554268158543	0.8095203073887572	2.767171096527121	-0.5847403876989407	CDK5;PDLIM5
iron ion transport (GO:0006826)	2/56	0.535734751180091	0.8647703435980814	4.025252774603994	-0.5848342327304498	ATP6V1H;DNM2
leukocyte cell-cell adhesion (GO:0007159)	2/46	0.43628319142701333	0.8426322540187647	3.4179256427681337	-0.585233125366475	S100A9;S100A8
determination of left/right symmetry (GO:0007368)	2/50	0.47749668168769016	0.8499445106818652	3.6016104488672602	-0.5855650010079871	NME7;DPCD
circadian regulation of gene expression (GO:0032922)	2/51	0.4875109166982658	0.8557884893599552	3.762120728404265	-0.5858826802386711	MAGED1;CSNK1D
negative regulation of proteasomal protein catabolic process (GO:1901799)	2/55	0.5263419631938782	0.8598980168195873	3.8885464913215926	-0.5869429696810203	UBXN1;PARK7
regulation of cytokine production involved in immune response (GO:0002718)	2/49	0.46736408508188676	0.8466136674986534	3.5250742340544035	-0.5869629555865513	TRAF2;MIF
response to pain (GO:0048265)	2/32	0.2807681478802829	0.8069204675453048	2.738693882034573	-0.5875324607948298	GIT2;DBH
regulation of calcium ion transmembrane transport (GO:1903169)	2/48	0.45711569178367023	0.8455245664600445	3.502548008908123	-0.5877207452758295	PDE4B;SRI
pituitary gland development (GO:0021983)	2/29	0.24631025160467376	0.7919746414988059	2.5215786737064994	-0.5880974707000004	KDM1A;ISL1
regulation of DNA-dependent DNA replication (GO:0090329)	2/34	0.30368554268158543	0.8095203073887572	2.7836878910735656	-0.5882306080394006	STAG2;ILKAP
negative regulation of protein complex disassembly (GO:0043242)	2/56	0.535734751180091	0.8647703435980814	4.052154992287475	-0.5887428910728352	ARHGEF2;CLASP2
regulation of calcium ion transmembrane transporter activity (GO:1901019)	2/48	0.45711569178367023	0.8455245664600445	3.517375554005255	-0.5902087785113294	PDE4B;SRI
negative regulation of axonogenesis (GO:0050771)	2/48	0.45711569178367023	0.8455245664600445	3.518525536690027	-0.590401743369721	GDI1;CDK5
positive regulation of receptor activity (GO:2000273)	2/30	0.2577928023338485	0.7919746414988059	2.532362672438611	-0.5906125785744911	CDK5;PARK7
cellular modified amino acid biosynthetic process (GO:0042398)	2/50	0.47749668168769016	0.8499445106818652	3.6366224753242005	-0.591257403781307	GGCT;GART
negative regulation of carbohydrate metabolic process (GO:0045912)	1/43	0.7470808017804121	0.9205796361626917	7.151924658627745	-0.5918344102702859	SOGA1
negative regulation of intracellular steroid hormone receptor signaling pathway (GO:0033144)	2/32	0.2807681478802829	0.8069204675453048	2.7625638618317807	-0.5926532915898939	DAB2;ISL1
positive regulation of tyrosine phosphorylation of STAT protein (GO:0042531)	2/46	0.43628319142701333	0.8426322540187647	3.462767081253145	-0.5929110850219279	KIT;ISL1
neuron death (GO:0070997)	2/47	0.44675434697824656	0.8426322540187647	3.4638030982709975	-0.5930884766742518	CDK5;CASP3
regulation of tyrosine phosphorylation of Stat3 protein (GO:0042516)	2/33	0.2922391285413727	0.8069204675453048	2.7704193933710557	-0.5943385400970008	KIT;ISL1
positive regulation of chemokine production (GO:0032722)	1/41	0.730748322354595	0.9183598006082494	6.980716386765681	-0.5945198697304609	MIF
regulation of DNA-templated transcription in response to stress (GO:0043620)	2/46	0.43628319142701333	0.8426322540187647	3.4758592237371273	-0.5951527825497416	TCEB2;TCEB1
negative regulation of hemostasis (GO:1900047)	1/43	0.7470808017804121	0.9205796361626917	7.202292089190466	-0.5960024042001376	VTN
negative regulation of blood coagulation (GO:0030195)	1/43	0.7470808017804121	0.9205796361626917	7.218221243645232	-0.5973205698943844	VTN
regulation of T cell mediated immunity (GO:0002709)	2/46	0.43628319142701333	0.8426322540187647	3.4899947546467445	-0.597573133896604	PPP3CB;TRAF2
regulation of lymphocyte apoptotic process (GO:0070228)	2/49	0.46736408508188676	0.8466136674986534	3.593876698176904	-0.5984193094138952	IRS2;MIF
cilium morphogenesis (GO:0060271)	2/50	0.47749668168769016	0.8499445106818652	3.6828021785245038	-0.598765494490989	PTPN23;TROVE2
glucosamine-containing compound metabolic process (GO:1901071)	2/25	0.200702336985382	0.7732397021436282	2.332272251564504	-0.5997815576294558	NAGK;GNE
pyrimidine nucleotide metabolic process (GO:0006220)	2/47	0.44675434697824656	0.8426322540187647	3.503378024056836	-0.5998646795307409	NME7;CTPS2
phagocytosis (GO:0006909)	2/48	0.45711569178367023	0.8455245664600445	3.5769700059498275	-0.6002086116676741	ABCA7;TXNDC5
cellular response to drug (GO:0035690)	2/49	0.46736408508188676	0.8466136674986534	3.604689545258435	-0.6002197653078356	PPP3CB;PDE4B
negative regulation of proteasomal ubiquitin-dependent protein catabolic process (GO:0032435)	2/52	0.49740449117862373	0.8557884893599552	3.857299360122767	-0.6007050413159398	UBXN1;PARK7
regulation of gluconeogenesis (GO:0006111)	2/36	0.3264680792324044	0.8106726404691404	2.863287738929417	-0.6009781996575441	WDR5;SOGA1
regulation of intrinsic apoptotic signaling pathway in response to DNA damage (GO:1902229)	2/32	0.2807681478802829	0.8069204675453048	2.8038233332164206	-0.6015046929504951	KDM1A;MIF
regulation of calcium ion-dependent exocytosis (GO:0017158)	2/34	0.30368554268158543	0.8095203073887572	2.8483463920500234	-0.6018938170026833	CDK5;STXBP1
cytosolic calcium ion transport (GO:0060401)	1/43	0.7470808017804121	0.9205796361626917	7.283862216176791	-0.6027524764261344	CHERP
thymus development (GO:0048538)	1/41	0.730748322354595	0.9183598006082494	7.078913487288395	-0.6028829264965763	PBX1
phospholipid transport (GO:0015914)	2/48	0.45711569178367023	0.8455245664600445	3.597278200406183	-0.6036162872086631	PITPNM3;ABCA7
regulation of histone acetylation (GO:0035065)	2/36	0.3264680792324044	0.8106726404691404	2.877012305615374	-0.6038588620743399	CTBP1;CTCF
regulation of monooxygenase activity (GO:0032768)	2/49	0.46736408508188676	0.8466136674986534	3.6293460551319647	-0.6043253406656546	PARK7;DNM2
acylglycerol biosynthetic process (GO:0046463)	1/43	0.7470808017804121	0.9205796361626917	7.317670164097835	-0.6055501438898376	TECR
regulation of alpha-beta T cell differentiation (GO:0046637)	1/42	0.7390420226853438	0.9186344023239151	7.13550535743886	-0.6055693396865436	AP3D1
regulation of cytokinesis (GO:0032465)	2/48	0.45711569178367023	0.8455245664600445	3.6100982842788847	-0.6057674723541628	CUL3;CCP110
negative regulation of intrinsic apoptotic signaling pathway in response to DNA damage (GO:1902230)	2/25	0.200702336985382	0.7732397021436282	2.358138179590964	-0.6064333996649792	KDM1A;MIF
serine family amino acid metabolic process (GO:0009069)	2/32	0.2807681478802829	0.8069204675453048	2.8277255766906353	-0.6066324452776336	CBS;GART
activation of Ras GTPase activity (GO:0032856)	2/32	0.2807681478802829	0.8069204675453048	2.8290454970407146	-0.606915608013134	DOCK7;SCRIB
placenta blood vessel development (GO:0060674)	2/30	0.2577928023338485	0.7919746414988059	2.602294486043489	-0.6069224891600054	RBM15;MAPK1
neutral lipid biosynthetic process (GO:0046460)	1/43	0.7470808017804121	0.9205796361626917	7.3353798462496735	-0.6070156513990315	TECR
neuromuscular process controlling balance (GO:0050885)	2/45	0.42570567704852835	0.8373355170710431	3.42089569054785	-0.6073130901070207	RBFOX1;HERC1
regulation of insulin secretion involved in cellular response to glucose stimulus (GO:0061178)	2/33	0.2922391285413727	0.8069204675453048	2.833341144159583	-0.6078371539146351	PPP3CB;SRI
regulation of substrate adhesion-dependent cell spreading (GO:1900024)	2/30	0.2577928023338485	0.7919746414988059	2.6079862452102693	-0.608249954848354	DAB2;ARHGEF7
protein-lipid complex subunit organization (GO:0071825)	2/33	0.2922391285413727	0.8069204675453048	2.8383534453120496	-0.6089124437269327	SNX9;ABCA7
negative regulation of cell-cell adhesion (GO:0022408)	1/41	0.730748322354595	0.9183598006082494	7.16810273403185	-0.6104788201581212	EPB41L5
activation of JUN kinase activity (GO:0007257)	2/36	0.3264680792324044	0.8106726404691404	2.9092946550842673	-0.6106346352531072	DAB2;DBNL
positive regulation of exocytosis (GO:0045921)	2/49	0.46736408508188676	0.8466136674986534	3.667981446004782	-0.6107585507801739	CDK5;STXBP1
sulfur compound catabolic process (GO:0044273)	1/43	0.7470808017804121	0.9205796361626917	7.382150387325674	-0.6108859963644729	CBS
regulation of B cell mediated immunity (GO:0002712)	1/41	0.730748322354595	0.9183598006082494	7.177998442979231	-0.6113215983585708	SUPT6H
negative regulation of protein depolymerization (GO:1901880)	2/52	0.49740449117862373	0.8557884893599552	3.9260561716056475	-0.6114126788173396	ARHGEF2;CLASP2
regulation of transcription from RNA polymerase II promoter in response to hypoxia (GO:0061418)	2/29	0.24631025160467376	0.7919746414988059	2.622679717860309	-0.6116768533192973	TCEB2;TCEB1
response to fungus (GO:0009620)	2/35	0.31509809433169983	0.8095203073887572	2.899371218111801	-0.6126760474947119	S100A9;S100A8
cerebellum development (GO:0021549)	2/30	0.2577928023338485	0.7919746414988059	2.627112044191739	-0.6127105866435879	PFDN1;GART
regulation of mesenchymal cell proliferation (GO:0010464)	1/43	0.7470808017804121	0.9205796361626917	7.413358555270207	-0.6134685274386485	IRS2
regulation of microtubule depolymerization (GO:0031114)	2/25	0.200702336985382	0.7732397021436282	2.3865885962543736	-0.6137498847837899	ARHGEF2;CLASP2
regulation of immunoglobulin production (GO:0002637)	2/39	0.36024389838620463	0.8159963567622832	3.020159022715236	-0.6141354106517595	TRAF2;SUPT6H
positive regulation of stem cell differentiation (GO:2000738)	2/39	0.36024389838620463	0.8159963567622832	3.02307736306205	-0.614728841704175	EPB41L5;DAB2
histone H3 acetylation (GO:0043966)	2/46	0.43628319142701333	0.8426322540187647	3.5909491595171925	-0.6148590166386274	LDB1;WDR5
vacuolar transport (GO:0007034)	2/50	0.47749668168769016	0.8499445106818652	3.7822266694823954	-0.6149303471241457	SNX27;SCYL2
cellular response to monosaccharide stimulus (GO:0071326)	1/41	0.730748322354595	0.9183598006082494	7.230317092450608	-0.6157773697930279	IRS2
androgen receptor signaling pathway (GO:0030521)	1/42	0.7390420226853438	0.9186344023239151	7.2582366389828765	-0.6159851823494619	FKBP4
I-kappaB kinase/NF-kappaB signaling (GO:0007249)	1/42	0.7390420226853438	0.9186344023239151	7.266600380053249	-0.6166949884393716	TANK
response to nicotine (GO:0035094)	1/38	0.7042557589716312	0.9147989897508119	6.936335970583956	-0.6176871077457754	ABAT
tricarboxylic acid cycle (GO:0006099)	2/29	0.24631025160467376	0.7919746414988059	2.652585776300244	-0.6186517208935378	IDH3G;SUCLG1
spleen development (GO:0048536)	2/33	0.2922391285413727	0.8069204675453048	2.8844331039508475	-0.6187979206727993	RBM15;PBX1
regulation of adherens junction organization (GO:1903391)	2/37	0.33778735742291593	0.8159963567622832	3.044823184424082	-0.61915075420338	EPB41L5;PTPN23
regulation of meiotic cell cycle (GO:0051445)	2/38	0.3490483269131367	0.8159963567622832	3.0472582423204835	-0.6196459119980259	NPR2;PRKACB
intraspecies interaction between organisms (GO:0051703)	2/39	0.36024389838620463	0.8159963567622832	3.049647808074605	-0.6201318191753132	PPP3CB;ANXA7
positive regulation of glucose transport (GO:0010828)	2/35	0.31509809433169983	0.8095203073887572	2.9367403022125735	-0.6205726364524615	C2CD5;IRS2
social behavior (GO:0035176)	2/39	0.36024389838620463	0.8159963567622832	3.0536589804295886	-0.6209474725773014	PPP3CB;ANXA7
regulation of interleukin-1 production (GO:0032652)	1/42	0.7390420226853438	0.9186344023239151	7.319091594266514	-0.6211497633064851	ISL1
mRNA stabilization (GO:0048255)	2/30	0.2577928023338485	0.7919746414988059	2.6637092987572015	-0.6212460144963607	YBX2;RBM10
substantia nigra development (GO:0021762)	2/45	0.42570567704852835	0.8373355170710431	3.5027372936854873	-0.6218424652756834	DYNLL1;INA
positive regulation of interleukin-2 production (GO:0032743)	2/29	0.24631025160467376	0.7919746414988059	2.6718254539749626	-0.6231389121501777	PDE4B;TRAF2
sperm motility (GO:0030317)	1/43	0.7470808017804121	0.9205796361626917	7.536363723436709	-0.6236474225804197	DPCD
regulation of mitotic sister chromatid separation (GO:0010965)	1/42	0.7390420226853438	0.9186344023239151	7.350576319048016	-0.6238217792382327	CUL3
regulation of release of cytochrome c from mitochondria (GO:0090199)	1/41	0.730748322354595	0.9183598006082494	7.325328142738659	-0.623869083323647	DNM1L
spindle checkpoint (GO:0031577)	1/41	0.730748322354595	0.9183598006082494	7.328749205344431	-0.6241604416287314	CSNK2A2
RNA stabilization (GO:0043489)	2/30	0.2577928023338485	0.7919746414988059	2.6779633085085286	-0.6245704188346028	YBX2;RBM10
regulation of sister chromatid segregation (GO:0033045)	1/42	0.7390420226853438	0.9186344023239151	7.361359121070541	-0.6247368839117852	CUL3
pyrimidine ribonucleotide metabolic process (GO:0009218)	2/29	0.24631025160467376	0.7919746414988059	2.6817614161519616	-0.6254562359307897	NME7;CTPS2
calcium ion transport into cytosol (GO:0060402)	1/42	0.7390420226853438	0.9186344023239151	7.371198682306634	-0.6255719385157782	CHERP
positive regulation of cell-matrix adhesion (GO:0001954)	2/39	0.36024389838620463	0.8159963567622832	3.0766887528990936	-0.6256304706136302	EPB41L5;CDK6
neuron apoptotic process (GO:0051402)	2/38	0.3490483269131367	0.8159963567622832	3.078726676160489	-0.6260448729115227	CDK5;CASP3
lysosomal transport (GO:0007041)	2/48	0.45711569178367023	0.8455245664600445	3.731535205130338	-0.6261443515419137	SNX27;SCYL2
sterol transport (GO:0015918)	1/42	0.7390420226853438	0.9186344023239151	7.378204802599641	-0.6261665273258304	ABCA7
regulation of interleukin-2 production (GO:0032663)	2/45	0.42570567704852835	0.8373355170710431	3.5272829095568374	-0.6262000590674492	PDE4B;TRAF2
regulation of interferon-beta production (GO:0032648)	2/35	0.31509809433169983	0.8095203073887572	2.9642857742589217	-0.6263933643517761	PPM1B;ZC3HAV1
regulation of mitotic sister chromatid segregation (GO:0033047)	1/42	0.7390420226853438	0.9186344023239151	7.38630466901965	-0.6268539391507547	CUL3
positive regulation of wound healing (GO:0090303)	1/41	0.730748322354595	0.9183598006082494	7.361106453903778	-0.6269161798843078	VTN
cholesterol transport (GO:0030301)	1/42	0.7390420226853438	0.9186344023239151	7.3914710166226385	-0.6272923918671095	ABCA7
glial cell development (GO:0021782)	2/40	0.37136747108478363	0.8159963567622832	3.0893035696443154	-0.6281956354290771	CDK6;CDK5
positive regulation of neural precursor cell proliferation (GO:2000179)	2/35	0.31509809433169983	0.8095203073887572	2.974742757217737	-0.6286030651820473	KDM1A;NES
regulation of peptidyl-lysine acetylation (GO:2000756)	2/40	0.37136747108478363	0.8159963567622832	3.0927518683711694	-0.6288968310743192	CTBP1;CTCF
regulation of transcription regulatory region DNA binding (GO:2000677)	2/24	0.18945050919287734	0.7502915190947231	2.1897058187728287	-0.6290881519628714	SRI;PARK7
T cell proliferation (GO:0042098)	1/41	0.730748322354595	0.9183598006082494	7.396234411468105	-0.6299078884136263	PPP3CB
endoderm development (GO:0007492)	2/24	0.18945050919287734	0.7502915190947231	2.1938393056830985	-0.6302756757020198	EPB41L5;DAB2
regulation of NF-kappaB import into nucleus (GO:0042345)	2/39	0.36024389838620463	0.8159963567622832	3.09970502458401	-0.630310723327668	PPM1B;UACA
tight junction assembly (GO:0070830)	2/39	0.36024389838620463	0.8159963567622832	3.1021216162322442	-0.6308021260959009	PARD3;STRN
regulation of ARF GTPase activity (GO:0032312)	2/34	0.30368554268158543	0.8095203073887572	2.9868331711397658	-0.6311579318952334	GIT2;GIT1
pyrimidine ribonucleoside metabolic process (GO:0046131)	2/37	0.33778735742291593	0.8159963567622832	3.1092527744473224	-0.6322522142355984	NME7;CTPS2
intracellular protein transmembrane transport (GO:0065002)	2/32	0.2807681478802829	0.8069204675453048	2.9529195807543527	-0.6334903361017331	C2CD5;SRP54
regulation of protein oligomerization (GO:0032459)	2/29	0.24631025160467376	0.7919746414988059	2.7192822309661064	-0.6342070619592978	SNX9;DNM1L
receptor internalization (GO:0031623)	2/43	0.4042470358383144	0.8246947149539122	3.2964505938134767	-0.6353644922535635	SCYL2;DNM2
adherens junction assembly (GO:0034333)	2/31	0.2692825169934407	0.7919746414988059	2.7268893754055687	-0.6359812451131873	ARHGEF7;FERMT2
base-excision repair (GO:0006284)	1/42	0.7390420226853438	0.9186344023239151	7.507093804557509	-0.6371049575979224	RPA1
embryonic skeletal system development (GO:0048706)	2/35	0.31509809433169983	0.8095203073887572	3.015332924444829	-0.6371803122308194	SP3;PBX1
peptidyl-lysine methylation (GO:0018022)	2/30	0.2577928023338485	0.7919746414988059	2.732046841094466	-0.6371840997210922	CTR9;WDR61
very long-chain fatty acid metabolic process (GO:0000038)	2/25	0.200702336985382	0.7732397021436282	2.477723858578701	-0.637186792526952	ABCD3;TECR
microtubule anchoring (GO:0034453)	2/29	0.24631025160467376	0.7919746414988059	2.7324408574049226	-0.6372759945320732	SEH1L;CLASP2
negative regulation of T cell proliferation (GO:0042130)	1/42	0.7390420226853438	0.9186344023239151	7.511254037711557	-0.6374580243420196	CASP3
ureteric bud development (GO:0001657)	1/40	0.722191635433454	0.9152910031964097	7.209710569138976	-0.6381547553423728	SMAD9
regulation of protein deacetylation (GO:0090311)	2/31	0.2692825169934407	0.7919746414988059	2.7383895901297195	-0.6386633931113057	CTBP1;DYRK1A
triglyceride biosynthetic process (GO:0019432)	1/41	0.730748322354595	0.9183598006082494	7.5029993624133295	-0.6390006349472157	TECR
catecholamine metabolic process (GO:0006584)	2/43	0.4042470358383144	0.8246947149539122	3.3200881420351442	-0.6399204406582398	DBH;HPRT1
pyrimidine nucleotide biosynthetic process (GO:0006221)	2/33	0.2922391285413727	0.8069204675453048	2.9839477529582883	-0.6401468151220904	NME7;CTPS2
amino sugar metabolic process (GO:0006040)	2/38	0.3490483269131367	0.8159963567622832	3.1512849269788243	-0.6407992586333812	NAGK;GNE
catechol-containing compound metabolic process (GO:0009712)	2/43	0.4042470358383144	0.8246947149539122	3.332752475411667	-0.642361389647618	DBH;HPRT1
regulation of mitochondrial outer membrane permeabilization involved in apoptotic signaling pathway (GO:1901028)	1/41	0.730748322354595	0.9183598006082494	7.548820787311136	-0.6429030635880288	DYNLL1
negative regulation of leukocyte apoptotic process (GO:2000107)	2/41	0.3824129095564769	0.8160154184847576	3.167554960723688	-0.6440337015663564	IRS2;MIF
pyrimidine nucleoside biosynthetic process (GO:0046134)	2/35	0.31509809433169983	0.8095203073887572	3.0507421462591497	-0.6446627559863969	NME7;CTPS2
lymphocyte homeostasis (GO:0002260)	2/44	0.41502558361372316	0.8254075243338662	3.3611964292697514	-0.6449398021306365	PPP3CB;CASP3
positive regulation of tumor necrosis factor production (GO:0032760)	2/44	0.41502558361372316	0.8254075243338662	3.3657016788847294	-0.645804260622241	ARHGEF2;ISL1
outflow tract morphogenesis (GO:0003151)	2/40	0.37136747108478363	0.8159963567622832	3.1777266350043654	-0.6461760580318447	DVL2;ISL1
glutamate receptor signaling pathway (GO:0007215)	2/40	0.37136747108478363	0.8159963567622832	3.180080597146348	-0.6466547253787798	HOMER3;CPEB4
cellular response to hexose stimulus (GO:0071331)	1/40	0.722191635433454	0.9152910031964097	7.321390972446214	-0.6480399483422327	IRS2
multicellular organismal homeostasis (GO:0048871)	2/44	0.41502558361372316	0.8254075243338662	3.3774049118677225	-0.6480498540956282	CRTC3;DBH
positive regulation of kidney development (GO:0090184)	1/37	0.6948591332990967	0.9147989897508119	7.277601123981229	-0.6480770840200407	MAGED1
regulation of immunoglobulin mediated immune response (GO:0002889)	1/40	0.722191635433454	0.9152910031964097	7.326349089609643	-0.6484788072971164	SUPT6H
RNA methylation (GO:0001510)	2/37	0.33778735742291593	0.8159963567622832	3.1922688527260275	-0.6491331509481809	METTL14;RNMT
cerebral cortex development (GO:0021987)	2/43	0.4042470358383144	0.8246947149539122	3.371360406260017	-0.6498027595945721	WDR62;GART
positive chemotaxis (GO:0050918)	2/31	0.2692825169934407	0.7919746414988059	2.7891957834640753	-0.6505127135816087	SCRIB;MIF
bone development (GO:0060348)	2/40	0.37136747108478363	0.8159963567622832	3.199187649319614	-0.6505400563313942	NPR2;SMAD9
positive regulation of reactive oxygen species metabolic process (GO:2000379)	1/38	0.7042557589716312	0.9147989897508119	7.309649572217841	-0.6509310278576756	PARK7
regulation of cardiac muscle contraction (GO:0055117)	2/43	0.4042470358383144	0.8246947149539122	3.3869051872335767	-0.6527988918250973	PDE4B;SRI
mitotic nuclear envelope disassembly (GO:0007077)	2/37	0.33778735742291593	0.8159963567622832	3.2152656476323775	-0.6538094431491089	SEH1L;EMD
regulation of synapse assembly (GO:0051963)	1/41	0.730748322354595	0.9183598006082494	7.684930205127864	-0.6544949617351733	PDLIM5
DNA methylation (GO:0006306)	1/42	0.7390420226853438	0.9186344023239151	7.729178074751479	-0.655952596008834	CTCF
DNA alkylation (GO:0006305)	1/42	0.7390420226853438	0.9186344023239151	7.734548073921187	-0.6564083320343037	CTCF
regulation of Rho protein signal transduction (GO:0035023)	2/31	0.2692825169934407	0.7919746414988059	2.8149057426004793	-0.6565089420941598	CUL3;ARHGEF2
hippocampus development (GO:0021766)	1/39	0.7133636418595277	0.9152910031964097	7.425843476216903	-0.6572853766225308	CDK5
positive regulation of cell-cell adhesion (GO:0022409)	1/39	0.7133636418595277	0.9152910031964097	7.430926019810891	-0.6577352489624305	MYO10
platelet aggregation (GO:0070527)	1/40	0.722191635433454	0.9152910031964097	7.4560891133324585	-0.6599625155962187	STXBP1
ovarian follicle development (GO:0001541)	2/41	0.3824129095564769	0.8160154184847576	3.2471977314481557	-0.6602268313048095	VGF;KIT
negative regulation of calcium ion transport (GO:0051926)	1/38	0.7042557589716312	0.9147989897508119	7.422600943839111	-0.6609894515483012	SRI
purine nucleobase metabolic process (GO:0006144)	2/40	0.37136747108478363	0.8159963567622832	3.2557048266400317	-0.6620325637263684	HPRT1;GART
blood vessel remodeling (GO:0001974)	1/36	0.6851646318802207	0.9135528425069609	7.3237179208770256	-0.6621670615136325	DBH
transferrin transport (GO:0033572)	2/33	0.2922391285413727	0.8069204675453048	3.087913823726976	-0.6624506738332062	ATP6V1H;DNM2
negative regulation of DNA replication (GO:0008156)	2/43	0.4042470358383144	0.8246947149539122	3.4372586413422055	-0.6625041174586875	STAG2;S100A11
positive regulation of interleukin-8 production (GO:0032757)	1/37	0.6948591332990967	0.9147989897508119	7.449369992667776	-0.6633732600054183	PARK7
negative regulation of blood pressure (GO:0045776)	1/39	0.7133636418595277	0.9152910031964097	7.50081098738846	-0.6639209930306421	ABAT
cellular response to glucose stimulus (GO:0071333)	1/38	0.7042557589716312	0.9147989897508119	7.46126654552037	-0.6644326589957249	IRS2
positive regulation of stress fiber assembly (GO:0051496)	2/39	0.36024389838620463	0.8159963567622832	3.2675413342266486	-0.6644394629633678	MTOR;PFN2
negative regulation of actin filament polymerization (GO:0030837)	1/40	0.722191635433454	0.9152910031964097	7.510982690012871	-0.664821323264075	PFN2
negative regulation of epidermal growth factor receptor signaling pathway (GO:0042059)	2/43	0.4042470358383144	0.8246947149539122	3.450355286612952	-0.6650283911087429	EPS15L1;ARHGEF7
positive regulation of striated muscle cell differentiation (GO:0051155)	1/39	0.7133636418595277	0.9152910031964097	7.521953627829427	-0.6657923963842871	MTOR
positive regulation of dendrite development (GO:1900006)	1/39	0.7133636418595277	0.9152910031964097	7.523703719360593	-0.6659473026349871	CUL7
embryo implantation (GO:0007566)	1/39	0.7133636418595277	0.9152910031964097	7.528110979550802	-0.6663374034610109	FKBP4
secondary metabolic process (GO:0019748)	1/40	0.722191635433454	0.9152910031964097	7.528132780165282	-0.6663393331037707	EPHX2
substrate adhesion-dependent cell spreading (GO:0034446)	1/37	0.6948591332990967	0.9147989897508119	7.489741776940226	-0.6669684045842769	FERMT2
cell-substrate junction assembly (GO:0007044)	2/41	0.3824129095564769	0.8160154184847576	3.2869223367147917	-0.6683037186486328	ARHGEF7;FERMT2
positive regulation of calcium ion transport into cytosol (GO:0010524)	1/37	0.6948591332990967	0.9147989897508119	7.507510310592189	-0.6685507088738772	SRI
sterol biosynthetic process (GO:0016126)	1/39	0.7133636418595277	0.9152910031964097	7.561563276718646	-0.6692983742669909	LBR
nuclear envelope disassembly (GO:0051081)	2/39	0.36024389838620463	0.8159963567622832	3.291467717667673	-0.6693047827062847	SEH1L;EMD
positive regulation of mitosis (GO:0045840)	2/42	0.3933745213581584	0.8160154184847576	3.292294844026914	-0.669396067736122	RANBP1;CUL3
spindle assembly (GO:0051225)	2/39	0.36024389838620463	0.8159963567622832	3.2923241381277597	-0.6694789318577001	HAUS8;CSNK1D
positive regulation of dephosphorylation (GO:0035306)	1/37	0.6948591332990967	0.9147989897508119	7.523576784959582	-0.6699814432162956	SYMPK
cardiac septum morphogenesis (GO:0060411)	2/43	0.4042470358383144	0.8246947149539122	3.4780396876200395	-0.6703643380275965	RBM15;ISL1
heart morphogenesis (GO:0003007)	1/39	0.7133636418595277	0.9152910031964097	7.574900200539266	-0.6704788684458001	DVL2
negative regulation of type I interferon production (GO:0032480)	2/39	0.36024389838620463	0.8159963567622832	3.3026518386786035	-0.671579022141416	PPM1B;TRIM25
cardiocyte differentiation (GO:0035051)	1/40	0.722191635433454	0.9152910031964097	7.590167299595996	-0.6718302086653422	ISL1
negative regulation of osteoblast differentiation (GO:0045668)	1/38	0.7042557589716312	0.9147989897508119	7.552305697722106	-0.6725397793620965	CDK6
regulation of pathway-restricted SMAD protein phosphorylation (GO:0060393)	1/38	0.7042557589716312	0.9147989897508119	7.552556651844964	-0.6725621270579092	DAB2
nucleoside diphosphate metabolic process (GO:0009132)	1/39	0.7133636418595277	0.9152910031964097	7.598936375825063	-0.6726063879088603	NME7
ferric iron transport (GO:0015682)	2/35	0.31509809433169983	0.8095203073887572	3.1829877248661917	-0.6726080214610193	ATP6V1H;DNM2
somatic stem cell maintenance (GO:0035019)	2/44	0.41502558361372316	0.8254075243338662	3.508328876335327	-0.673171288535638	LDB1;KIT
ATP biosynthetic process (GO:0006754)	2/39	0.36024389838620463	0.8159963567622832	3.3106732244866066	-0.6732101339570995	ATP5H;ATP5L
protein kinase C-activating G-protein coupled receptor signaling pathway (GO:0007205)	1/38	0.7042557589716312	0.9147989897508119	7.573321966600253	-0.6744112974653146	PARD3
positive regulation of oxidoreductase activity (GO:0051353)	1/38	0.7042557589716312	0.9147989897508119	7.57706405645347	-0.6747445340138556	PARK7
negative regulation of epithelial cell migration (GO:0010633)	2/42	0.3933745213581584	0.8160154184847576	3.319038973814628	-0.6748337384682559	PTPN23;PFN2
water homeostasis (GO:0030104)	1/38	0.7042557589716312	0.9147989897508119	7.593260067304417	-0.67618680369946	ANXA7
regulation of transcription from RNA polymerase II promoter in response to stress (GO:0043618)	2/41	0.3824129095564769	0.8160154184847576	3.325790170957991	-0.6762064055695872	TCEB2;TCEB1
membrane disassembly (GO:0030397)	2/39	0.36024389838620463	0.8159963567622832	3.3271773931808313	-0.676566180556719	SEH1L;EMD
positive regulation of lipid transport (GO:0032370)	2/44	0.41502558361372316	0.8254075243338662	3.528311788522567	-0.6770055706739279	ABCA7;MIF
response to zinc ion (GO:0010043)	2/41	0.3824129095564769	0.8160154184847576	3.3314582996282707	-0.6773588609914312	S100A9;S100A8
mitotic spindle organization (GO:0007052)	2/31	0.2692825169934407	0.7919746414988059	2.9044864190281046	-0.6774014765131804	DCTN2;KIF2A
negative regulation of ERBB signaling pathway (GO:1901185)	2/44	0.41502558361372316	0.8254075243338662	3.530431283687965	-0.6774122552641783	EPS15L1;ARHGEF7
negative regulation of endocytosis (GO:0045806)	1/36	0.6851646318802207	0.9135528425069609	7.500332675045319	-0.6781355182525516	LRSAM1
ventricular cardiac muscle tissue morphogenesis (GO:0055010)	1/38	0.7042557589716312	0.9147989897508119	7.6205076246016565	-0.6786132237764927	ISL1
neurogenesis (GO:0022008)	2/39	0.36024389838620463	0.8159963567622832	3.338401160597568	-0.6788484819056527	CDK6;WDR62
trivalent inorganic cation transport (GO:0072512)	2/35	0.31509809433169983	0.8095203073887572	3.212792339528017	-0.6789061365123242	ATP6V1H;DNM2
negative regulation of BMP signaling pathway (GO:0030514)	1/40	0.722191635433454	0.9152910031964097	7.675274385242041	-0.6793633115406272	SKOR2
negative regulation of I-kappaB kinase/NF-kappaB signaling (GO:0043124)	2/44	0.41502558361372316	0.8254075243338662	3.5457811753907995	-0.6803575624861378	PPM1B;UACA
regulation of lipid storage (GO:0010883)	1/38	0.7042557589716312	0.9147989897508119	7.6486680432474285	-0.6811209349975155	OSBPL8
negative regulation of small GTPase mediated signal transduction (GO:0051058)	1/39	0.7133636418595277	0.9152910031964097	7.697443805572673	-0.681325598496741	CUL3
regulation of muscle cell apoptotic process (GO:0010660)	1/38	0.7042557589716312	0.9147989897508119	7.654560627647445	-0.6816456750664265	RBM10
regulation of centrosome cycle (GO:0046605)	2/24	0.18945050919287734	0.7502915190947231	2.37436089214192	-0.6821383461307033	PKHD1;RANBP1
regulation of cell aging (GO:0090342)	2/24	0.18945050919287734	0.7502915190947231	2.3788680582727317	-0.6834332254644995	CDK6;MIF
positive regulation of filopodium assembly (GO:0051491)	2/24	0.18945050919287734	0.7502915190947231	2.3844961514927627	-0.6850501398155096	DPYSL3;FNBP1L
regulation of interleukin-1 beta production (GO:0032651)	1/38	0.7042557589716312	0.9147989897508119	7.697527359924135	-0.6854719021554585	ISL1
intermediate filament-based process (GO:0045103)	1/38	0.7042557589716312	0.9147989897508119	7.700437032330097	-0.685731011163521	INA
extrinsic apoptotic signaling pathway in absence of ligand (GO:0097192)	1/36	0.6851646318802207	0.9135528425069609	7.586304466507125	-0.6859085768466091	CASP3
regulation of oxidative stress-induced cell death (GO:1903201)	1/39	0.7133636418595277	0.9152910031964097	7.764187257789968	-0.687233276899637	PARK7
intermediate filament cytoskeleton organization (GO:0045104)	1/37	0.6948591332990967	0.9147989897508119	7.718151475780112	-0.6873084986708116	INA
signal transduction in absence of ligand (GO:0038034)	1/36	0.6851646318802207	0.9135528425069609	7.6020152913755545	-0.6873290562874446	CASP3
positive regulation of mesenchymal cell proliferation (GO:0002053)	1/37	0.6948591332990967	0.9147989897508119	7.732492520798435	-0.6885855819402764	IRS2
actin polymerization or depolymerization (GO:0008154)	2/41	0.3824129095564769	0.8160154184847576	3.3882165786651464	-0.6888990694474523	ENAH;ABI2
monosaccharide catabolic process (GO:0046365)	1/40	0.722191635433454	0.9152910031964097	7.803439431978755	-0.6907076135426811	TKT
primary alcohol metabolic process (GO:0034308)	2/41	0.3824129095564769	0.8160154184847576	3.3986784166107897	-0.6910261915655735	PARK7;ADH5
pyrimidine-containing compound biosynthetic process (GO:0072528)	2/41	0.3824129095564769	0.8160154184847576	3.40597127200647	-0.6925089897217876	NME7;CTPS2
cellular metabolic compound salvage (GO:0043094)	1/37	0.6948591332990967	0.9147989897508119	7.784322400790354	-0.6932010804978418	HPRT1
cell differentiation in spinal cord (GO:0021515)	1/38	0.7042557589716312	0.9147989897508119	7.791324717069721	-0.693824643212864	ISL1
retina homeostasis (GO:0001895)	1/39	0.7133636418595277	0.9152910031964097	7.841087683099157	-0.6940399817774959	IGHG3
lipid phosphorylation (GO:0046834)	1/39	0.7133636418595277	0.9152910031964097	7.853832053074824	-0.695168027102731	PIK3R6
regulation of cell-substrate junction assembly (GO:0090109)	1/36	0.6851646318802207	0.9135528425069609	7.6934333232918855	-0.6955945315852898	EPB41L5
hair follicle development (GO:0001942)	1/38	0.7042557589716312	0.9147989897508119	7.813173632242333	-0.6957703092356153	LDB1
oligosaccharide metabolic process (GO:0009311)	2/41	0.3824129095564769	0.8160154184847576	3.4272579338814175	-0.6968370370047248	COG2;MOGS
positive regulation of transcription factor import into nucleus (GO:0042993)	1/36	0.6851646318802207	0.9135528425069609	7.7079785385633794	-0.6969096235316841	CHERP
regulation of focal adhesion assembly (GO:0051893)	1/36	0.6851646318802207	0.9135528425069609	7.7105284908210905	-0.6971401750646256	EPB41L5
actin-myosin filament sliding (GO:0033275)	1/38	0.7042557589716312	0.9147989897508119	7.838925943686139	-0.6980635762920196	TMOD1
regulation of vasodilation (GO:0042312)	1/39	0.7133636418595277	0.9152910031964097	7.886588438839794	-0.6980674005440481	EPHX2
deoxyribonucleotide metabolic process (GO:0009262)	1/36	0.6851646318802207	0.9135528425069609	7.734013070752837	-0.6992635112515584	RRM1
muscle filament sliding (GO:0030049)	1/38	0.7042557589716312	0.9147989897508119	7.859032049972713	-0.6998540435780409	TMOD1
synaptic transmission, glutamatergic (GO:0035249)	1/36	0.6851646318802207	0.9135528425069609	7.7486117797122	-0.7005834397793841	CDK5
phagosome maturation (GO:0090382)	1/39	0.7133636418595277	0.9152910031964097	7.916522341366769	-0.7007169468830249	ATP6V1H
negative regulation of Ras protein signal transduction (GO:0046580)	1/38	0.7042557589716312	0.9147989897508119	7.880897919881008	-0.7018012194356231	CUL3
regulation of insulin receptor signaling pathway (GO:0046626)	1/36	0.6851646318802207	0.9135528425069609	7.765645990560753	-0.702123571917821	OSBPL8
leukotriene metabolic process (GO:0006691)	1/37	0.6948591332990967	0.9147989897508119	7.884991394450794	-0.7021657471168608	RNPEP
positive regulation of substrate adhesion-dependent cell spreading (GO:1900026)	2/24	0.18945050919287734	0.7502915190947231	2.447239471732582	-0.7030758851185033	DAB2;ARHGEF7
aspartate family amino acid metabolic process (GO:0009066)	2/42	0.3933745213581584	0.8160154184847576	3.461772989411629	-0.7038547081259897	ASNSD1;ASNS
regulation of cilium assembly (GO:1902017)	1/38	0.7042557589716312	0.9147989897508119	7.905093174844854	-0.7039558291781688	TBC1D5
fatty acid derivative biosynthetic process (GO:1901570)	2/42	0.3933745213581584	0.8160154184847576	3.463037311384132	-0.7041117726347416	RNPEP;MIF
mitotic spindle checkpoint (GO:0071174)	1/36	0.6851646318802207	0.9135528425069609	7.793932663351435	-0.7046810848100654	CSNK2A2
positive regulation of response to biotic stimulus (GO:0002833)	2/24	0.18945050919287734	0.7502915190947231	2.4545845713906385	-0.7051860841828047	MIF;ZC3HAV1
regulation of nitric-oxide synthase activity (GO:0050999)	1/37	0.6948591332990967	0.9147989897508119	7.9219634254884905	-0.7054581405384036	DNM2
negative regulation of cellular carbohydrate metabolic process (GO:0010677)	1/36	0.6851646318802207	0.9135528425069609	7.8208358567684755	-0.707113511717103	SOGA1
negative regulation of ion transmembrane transporter activity (GO:0032413)	1/35	0.6751628335751334	0.909932271648907	7.491810629353329	-0.707115362862565	SRI
negative regulation of DNA binding (GO:0043392)	2/42	0.3933745213581584	0.8160154184847576	3.483017811545479	-0.7081742484678742	KDM1A;SRI
JAK-STAT cascade involved in growth hormone signaling pathway (GO:0060397)	2/23	0.17828954938813732	0.7327391307223446	2.277972989451141	-0.7083710849218174	MAPK1;IRS2
activation of Rho GTPase activity (GO:0032862)	2/24	0.18945050919287734	0.7502915190947231	2.4669229500465013	-0.7087308196263927	DOCK7;SCRIB
icosanoid biosynthetic process (GO:0046456)	2/42	0.3933745213581584	0.8160154184847576	3.486412069569496	-0.7088643758962487	RNPEP;MIF
cilium movement (GO:0003341)	2/31	0.2692825169934407	0.7919746414988059	3.0420573334699044	-0.7094865776717277	NME7;DPCD
sister chromatid cohesion (GO:0007062)	2/24	0.18945050919287734	0.7502915190947231	2.4700469751305585	-0.7096283315889433	STAG2;PDS5B
transcription from RNA polymerase III promoter (GO:0006383)	2/44	0.41502558361372316	0.8254075243338662	3.7156397333424946	-0.7129496906347927	GTF3C4;TROVE2
positive regulation of fat cell differentiation (GO:0045600)	1/38	0.7042557589716312	0.9147989897508119	8.02846501508135	-0.7149422051980344	CARM1
establishment of chromosome localization (GO:0051303)	2/24	0.18945050919287734	0.7502915190947231	2.4972166119384687	-0.7174339904415875	SEH1L;CUL3
positive regulation of alpha-beta T cell differentiation (GO:0046638)	1/35	0.6751628335751334	0.909932271648907	7.610113332422905	-0.71828137638684	AP3D1
focal adhesion assembly (GO:0048041)	2/23	0.17828954938813732	0.7327391307223446	2.3101063127684913	-0.7183634409356345	ARHGEF7;FERMT2
regulation of fatty acid transport (GO:2000191)	2/23	0.17828954938813732	0.7327391307223446	2.315228699677415	-0.7199563267112195	IRS2;MIF
cell-substrate adherens junction assembly (GO:0007045)	2/23	0.17828954938813732	0.7327391307223446	2.3256567326880626	-0.7231990855549637	ARHGEF7;FERMT2
DNA packaging (GO:0006323)	1/36	0.6851646318802207	0.9135528425069609	8.00779039998234	-0.7240168307490468	SRPK1
establishment of pigment granule localization (GO:0051905)	2/24	0.18945050919287734	0.7502915190947231	2.5214700974582755	-0.7244018581129007	DCTN2;DCTN1
neural crest cell migration (GO:0001755)	1/35	0.6751628335751334	0.909932271648907	7.689123361225675	-0.7257387465675215	ISL1
regulation of fatty acid oxidation (GO:0046320)	2/24	0.18945050919287734	0.7502915190947231	2.527906395640906	-0.7262509644606484	IRS2;MTOR
endosome to lysosome transport (GO:0008333)	2/31	0.2692825169934407	0.7919746414988059	3.11526787987611	-0.7265611736853305	SNX27;SCYL2
spliceosomal snRNP assembly (GO:0000387)	1/37	0.6948591332990967	0.9147989897508119	8.164309935182116	-0.7270393204696775	SART1
positive regulation of organic acid transport (GO:0032892)	2/23	0.17828954938813732	0.7327391307223446	2.346241511967328	-0.7296002424161092	DPYSL2;MIF
negative regulation of nucleoside metabolic process (GO:0045978)	1/35	0.6751628335751334	0.909932271648907	7.73794833689439	-0.7303470972179595	ABCA7
patterning of blood vessels (GO:0001569)	1/35	0.6751628335751334	0.909932271648907	7.748543177313776	-0.7313470923857861	RBM15
positive regulation of phagocytosis (GO:0050766)	1/35	0.6751628335751334	0.909932271648907	7.760519576014705	-0.7324774860826067	ABCA7
defense response to fungus (GO:0050832)	2/23	0.17828954938813732	0.7327391307223446	2.365665224045512	-0.7356403473961719	S100A9;S100A8
placenta development (GO:0001890)	1/36	0.6851646318802207	0.9135528425069609	8.159821011871559	-0.7377625354064905	CUL7
carbohydrate phosphorylation (GO:0046835)	2/24	0.18945050919287734	0.7502915190947231	2.582413710503383	-0.7419105593164136	NAGK;GNE
female gamete generation (GO:0007292)	1/37	0.6948591332990967	0.9147989897508119	8.348591987587687	-0.7434498069920409	DYNLL1
extrinsic apoptotic signaling pathway via death domain receptors (GO:0008625)	1/35	0.6751628335751334	0.909932271648907	7.940524812975623	-0.7494672999938224	CASP3
myeloid cell activation involved in immune response (GO:0002275)	1/35	0.6751628335751334	0.909932271648907	7.990847250380054	-0.7542169887334103	KIT
regulation of lamellipodium assembly (GO:0010591)	2/22	0.16723646083107996	0.7191873027685746	2.290010522735107	-0.7548640706122448	BRK1;MTOR
face morphogenesis (GO:0060325)	1/34	0.6648440199404977	0.9077371064382024	7.8433007418112055	-0.7592352190002958	SGPL1
regulation of androgen receptor signaling pathway (GO:0060765)	2/22	0.16723646083107996	0.7191873027685746	2.3150825832030906	-0.7631286604189738	DAB2;PARK7
nucleotide phosphorylation (GO:0046939)	1/35	0.6751628335751334	0.909932271648907	8.118886490150611	-0.7663019863354945	NME7
embryonic axis specification (GO:0000578)	1/34	0.6648440199404977	0.9077371064382024	7.928311382806417	-0.7674642892295281	EPB41L5
insulin secretion (GO:0030073)	1/35	0.6751628335751334	0.909932271648907	8.132637149705582	-0.7675998438364191	VGF
chromosome organization involved in meiosis (GO:0070192)	1/36	0.6851646318802207	0.9135528425069609	8.538306016497035	-0.7719829008066114	NDC1
T cell differentiation in thymus (GO:0033077)	1/34	0.6648440199404977	0.9077371064382024	8.02331131808756	-0.7766603278671511	CDK6
regulation of synaptic vesicle transport (GO:1902803)	2/23	0.17828954938813732	0.7327391307223446	2.50614969507022	-0.7793261758126087	STXBP1;PFN2
negative regulation of microtubule depolymerization (GO:0007026)	2/23	0.17828954938813732	0.7327391307223446	2.5076706233395156	-0.7797991320825901	ARHGEF2;CLASP2
gene silencing by RNA (GO:0031047)	1/35	0.6751628335751334	0.909932271648907	8.318898898877393	-0.7851801793346229	XPO5
regulation of cholesterol transport (GO:0032374)	1/34	0.6648440199404977	0.9077371064382024	8.164592986738676	-0.7903364601703843	ABCA7
regulation of microtubule polymerization (GO:0031113)	2/22	0.16723646083107996	0.7191873027685746	2.3977260217267666	-0.7903707022323296	FKBP4;MAPRE1
hexose catabolic process (GO:0019320)	1/35	0.6751628335751334	0.909932271648907	8.374688237372203	-0.790445862129521	TKT
negative regulation of reproductive process (GO:2000242)	1/34	0.6648440199404977	0.9077371064382024	8.165895618903706	-0.7904625555796578	NPR2
negative regulation of leukocyte mediated immunity (GO:0002704)	1/34	0.6648440199404977	0.9077371064382024	8.194355134713557	-0.7932174501616479	PPP3CB
positive regulation of T cell mediated immunity (GO:0002711)	1/34	0.6648440199404977	0.9077371064382024	8.198862523533249	-0.7936537675298441	TRAF2
regulation of sterol transport (GO:0032371)	1/34	0.6648440199404977	0.9077371064382024	8.206739665670362	-0.794416278611905	ABCA7
cholesterol biosynthetic process (GO:0006695)	1/34	0.6648440199404977	0.9077371064382024	8.208310708814313	-0.7945683563308044	LBR
establishment of melanosome localization (GO:0032401)	2/23	0.17828954938813732	0.7327391307223446	2.564907341299624	-0.7975977785926767	DCTN2;DCTN1
regulation of membrane depolarization (GO:0003254)	1/34	0.6648440199404977	0.9077371064382024	8.24137419406743	-0.7977689173310021	FHL1
cellular response to corticosteroid stimulus (GO:0071384)	1/33	0.6541981659151123	0.9059152311933655	8.100943980648324	-0.8004505573728103	ISL1
positive regulation of mitochondrial outer membrane permeabilization involved in apoptotic signaling pathway (GO:1901030)	1/34	0.6648440199404977	0.9077371064382024	8.284667686780395	-0.8019597478886005	DYNLL1
negative regulation of nucleotide catabolic process (GO:0030812)	1/33	0.6541981659151123	0.9059152311933655	8.14896651816747	-0.8051956422685314	ABCA7
pigment granule transport (GO:0051904)	2/23	0.17828954938813732	0.7327391307223446	2.5942636505041645	-0.8067265789326364	DCTN2;DCTN1
regulation of glycoprotein metabolic process (GO:1903018)	1/33	0.6541981659151123	0.9059152311933655	8.175174974955263	-0.8077852878572164	ABCA7
regulation of lipoprotein lipase activity (GO:0051004)	1/33	0.6541981659151123	0.9059152311933655	8.192945046403347	-0.8095411404626845	TIPRL
ribosome biogenesis (GO:0042254)	1/34	0.6648440199404977	0.9077371064382024	8.426192917916776	-0.8156594571555289	GNL1
drug metabolic process (GO:0017144)	1/35	0.6751628335751334	0.909932271648907	8.664070025703204	-0.8177591937639	EPHX2
regulation of viral entry into host cell (GO:0046596)	2/22	0.16723646083107996	0.7191873027685746	2.484559556602506	-0.8189939399647325	TRIM25;TRIM56
nerve development (GO:0021675)	1/35	0.6751628335751334	0.909932271648907	8.679290038247707	-0.8191957363069018	ISL1
hydrogen peroxide metabolic process (GO:0042743)	1/33	0.6541981659151123	0.9059152311933655	8.322258604955856	-0.8223185538439499	PARK7
cyclic nucleotide biosynthetic process (GO:0009190)	1/34	0.6648440199404977	0.9077371064382024	8.512499968866104	-0.8240140204810773	NPR2
meiotic cell cycle (GO:0051321)	1/34	0.6648440199404977	0.9077371064382024	8.530472650292694	-0.8257537845380895	STAG2
melanosome transport (GO:0032402)	2/22	0.16723646083107996	0.7191873027685746	2.509496318439768	-0.8272139308169496	DCTN2;DCTN1
phosphatidylinositol phosphorylation (GO:0046854)	1/34	0.6648440199404977	0.9077371064382024	8.598335299116117	-0.8323229210199699	PIK3R6
mitotic cytokinesis (GO:0000281)	2/22	0.16723646083107996	0.7191873027685746	2.526792185415134	-0.8329152271298587	CUL7;SNX9
polysaccharide catabolic process (GO:0000272)	2/22	0.16723646083107996	0.7191873027685746	2.5317773415110545	-0.8345585013357386	PYGB;AGL
cyclic purine nucleotide metabolic process (GO:0052652)	1/33	0.6541981659151123	0.9059152311933655	8.588138471605012	-0.8485900214608009	NPR2
calcium ion-dependent exocytosis (GO:0017156)	1/33	0.6541981659151123	0.9059152311933655	8.662687611969648	-0.8559561878111774	PPP3CB
ATP synthesis coupled proton transport (GO:0015986)	2/22	0.16723646083107996	0.7191873027685746	2.61402783818786	-0.8616710163722096	ATP5H;ATP5L
pyrimidine nucleoside triphosphate biosynthetic process (GO:0009148)	2/22	0.16723646083107996	0.7191873027685746	2.6153030683189793	-0.8620913748806911	NME7;CTPS2
sequestering of metal ion (GO:0051238)	3/11	0.008139428109004606	0.13078267537858249	0.42492629617492184	-0.8643928478156102	SRI;S100A9;S100A8
regulation of dendritic spine morphogenesis (GO:0061001)	2/21	0.15630922837550423	0.6989676816036698	2.4203565509841414	-0.8668525696829013	CDK5;PDLIM5
modification by symbiont of host morphology or physiology (GO:0044003)	1/32	0.6432149300728647	0.8975972822017798	8.114860969873085	-0.8766790403856687	VAPB
energy coupled proton transport, down electrochemical gradient (GO:0015985)	2/22	0.16723646083107996	0.7191873027685746	2.668339606150626	-0.8795739918561627	ATP5H;ATP5L
positive regulation of protein tyrosine kinase activity (GO:0061098)	1/32	0.6432149300728647	0.8975972822017798	8.144597339909739	-0.8798915726083488	DVL2
gastrulation with mouth forming second (GO:0001702)	2/21	0.15630922837550423	0.6989676816036698	2.4580993979002974	-0.8803701994813353	LDB1;RNF2
neuroepithelial cell differentiation (GO:0060563)	1/32	0.6432149300728647	0.8975972822017798	8.20554503974501	-0.886475982520443	KIT
regulation of synaptic transmission, GABAergic (GO:0032228)	1/32	0.6432149300728647	0.8975972822017798	8.30596543675717	-0.8973247768022685	STXBP1
regulation of activated T cell proliferation (GO:0046006)	1/32	0.6432149300728647	0.8975972822017798	8.308388141894158	-0.8975865107768267	CASP3
negative regulation of purine nucleotide catabolic process (GO:0033122)	1/32	0.6432149300728647	0.8975972822017798	8.342275164491943	-0.9012474536522311	ABCA7
[truncated: 845 more rows]

## Sheet: (B) CC
Term	Overlap	P-value	Adjusted P-value	Z-score	Combined Score	Genes
cytosol (GO:0005829)	164/2529	0.000000000000000010117210758974	0.000000000000003814188456133108	-2.0971989640174207	69.62710727187337	CCP110;PPP2R2A;IRS2;PARK7;ENO2;EPRS;EDC3;PSMD6;DPYSL4;CAPNS1;PSMD4;DPYSL5;DPYSL2;DPYSL3;PSMD3;KIF5A;PSMD1;TRIM25;HOMER3;VPS35;KPNA4;PRKACB;KPNA3;GLUL;SKP1;KPNA1;NSF;TMOD1;CSNK2A2;COG2;CSNK1D;LARP4B;DYNC1LI2;MAP1B;PARD3;AKAP9;S100A6;HPRT1;FKBP4;SQSTM1;S100A9;VPS28;S100A8;GNE;PSMD12;CUL7;COPA;SEH1L;PSMD13;SHC1;CTBP1;STXBP1;COPB1;PDS5B;VPS26B;PIK3R6;STK3;HSPH1;LARS;PRKAR2B;PRKAR2A;DHX36;DVL2;ATP6V1H…
proteasome accessory complex (GO:0022624)	10/17	0.000000006286749637355146	0.000001185052306641445	-2.771659974232683	37.82130604275497	PSMD6;PSMD12;PSMC5;PSMC6;PSMD4;PSMD13;PSMC1;PSMD3;PSMC2;PSMD1
microtubule (GO:0005874)	35/360	0.00000007872727700361966	0.000009893394476788205	-2.3810272081443635	27.438108110636975	DYNC1I2;DCTN2;DCTN1;STAU2;CUL3;HSPH1;HAUS8;KIF5C;MAP2;DPYSL2;KIF5A;MAP7;KIF21A;KIF1B;FSD1;TBL1X;KIF3C;DNM1L;EMD;CLASP2;DYNLT1;CSNK1D;TBCA;DYNLL1;DNM2;DYNC1LI1;DYNC1LI2;KIF2A;TBL1XR1;MAP1B;TBCE;DCX;ARHGEF2;FKBP4;MAPRE1
nucleolus (GO:0005730)	95/1653	0.0000002301913967809421	0.000012993548110208383	-2.1178157788721697	23.827667362808747	GPI;CRTC3;KDM1A;WDR3;SRP54;CTCF;PTPN23;DCAF7;SART1;MRPL40;PSMD4;XPO5;PPP6R3;PSMD3;DPF2;TRIM25;DHX16;NELFA;ZNF687;KPNA1;UTP15;TTC37;CDV3;RBM17;RBM15;EDF1;IMP4;PLRG1;LARP4B;AP3B2;SENP3;SEPT2;PSMA1;FAM96B;MCM5;PFDN2;TKT;FKBP4;PAFAH1B2;CUL7;WDR26;CTBP1;RNMT;HEATR1;UBR4;WDR61;WDR62;PDS5B;BRCC3;HTATSF1;TROVE2;MLLT4;RNF2;PPM1G;RBM15B;HSPH1;LARP1;SNX27;ASNA1;GAR1;MVB12A;MAPK1;SYMPK;E4F1;UBQLN4;RBM10;RBM1…
proteasome complex (GO:0000502)	14/63	0.00000016031619863982264	0.000012649918176887044	-2.089518957178386	23.565301871572377	PSMD12;UBXN1;PSMD13;PSMA6;PSMD6;PSMC5;PSMC6;PSMD4;PSMA1;PSMC1;PSMD3;PSMC2;PSMD1;UBQLN4
membrane coat (GO:0030117)	13/55	0.000000241259513982649	0.000012993548110208383	-2.0312216896493696	22.853392275159205	COPA;COPB1;AP3D1;CLTB;EPS15L1;AP3B2;COPZ1;ARCN1;DAB2;COPG2;COPG1;COPE;SCYL1
COPI vesicle coat (GO:0030126)	8/13	0.0000001677707981019502	0.000012649918176887044	-1.999104330529595	22.545618387359617	COPA;COPB1;COPG2;COPG1;COPZ1;COPE;ARCN1;SCYL1
extracellular vesicular exosome (GO:0070062)	134/2717	0.0000019934283289708638	0.00007545802425178628	-2.090037405729174	19.83849716808398	CYFIP1;PDCD6;PDCD5;ABAT;PARK7;FNBP1L;ENO2;SOGA1;IGHG3;PSMD6;TFG;CAPNS1;DPYSL2;PSMD3;CPNE1;PSMD1;VPS35;KPNA4;PRKACB;GLUL;SKP1;PLS1;NSF;SCRIB;MOGS;MIF;SCAMP3;S100A6;TAGLN2;SUCLG1;HPRT1;FKBP4;SQSTM1;S100A9;S100A8;VPS28;PFN2;PSMD12;COPA;TMED10;SAR1A;PSMD13;STXBP1;CUL3;ATP5H;ADH5;CORO1B;ATP5L;PKHD1;VTN;HSPH1;PRKAR2B;PRKAR2A;FIGNL1;ATP6V1H;SNX9;S100A11;TXNDC5;ST13;EPHX2;GPR98;DNAJC11;PA2G4;ARPC5;TBCA;H…
microtubule associated complex (GO:0005875)	18/138	0.000003285070591259708	0.00011258832844590092	-2.040279070394821	18.54975314992957	DYNC1I2;DYNLT1;DCTN2;DCTN1;DYNLL1;DYNC1LI1;DYNC1LI2;KIF2A;HAUS8;KIF5C;MAP2;MAP1B;KIF5A;DCX;MAP7;KIF21A;KIF1B;KIF3C
vesicle coat (GO:0030120)	9/31	0.000004265068914954437	0.00013399424841148522	-1.9397591215268228	17.29821645634382	COPA;COPB1;CLTB;COPG2;COPG1;COPZ1;COPE;SCYL1;ARCN1
centrosome (GO:0005813)	29/360	0.000030243527913175866	0.0008144150016619501	-2.1154080500870824	15.046983117011257	DYNC1I2;CUL7;DCTN2;DCTN1;UBR4;CCP110;UXT;PKHD1;HAUS8;PRKAR2B;PRKAR2A;DPF2;PRKACB;UBQLN4;RANBP1;PPP1R12A;CSNK1D;DYNLL1;CKAP5;MZT1;MZT2B;DYNC1LI1;MARCKS;DYNC1LI2;KIF2A;PSMA1;NME7;AKAP9;MAPRE1
Golgi transport complex (GO:0017119)	7/13	0.0000020015391048219174	0.00007545802425178628	-1.5578450058224333	14.7869620187682	COG7;COG6;VPS51;COG5;COG4;COG2;COG1
prefoldin complex (GO:0016272)	7/10	0.0000005467367089708182	0.000025764967410249808	-1.2909919114363637	13.641259372054696	UXT;VBP1;PFDN1;PFDN2;PFDN4;PFDN5;PFDN6
microtubule organizing center (GO:0005815)	31/427	0.00010025446879710746	0.0023622459210318448	-2.1064102266583133	12.73986911114244	DYNC1I2;CUL7;DCTN2;DCTN1;UBR4;CCP110;PTPN23;PKHD1;UXT;HAUS8;PRKAR2B;PRKAR2A;DPF2;PRKACB;UBQLN4;RANBP1;PPP1R12A;CSNK1D;DYNLL1;CKAP5;MZT1;MZT2B;DYNC1LI1;MARCKS;DYNC1LI2;KIF2A;LAS1L;PSMA1;NME7;AKAP9;MAPRE1
adherens junction (GO:0005912)	30/405	0.00009289098815788962	0.0023346601690349593	-2.092704285952711	12.681555549475023	CYFIP1;TES;ARPC1B;FHL1;DOCK7;MLLT4;CORO1B;CNN3;EPB41L5;PRKAR2A;MAPK1;CTNNA2;GIT1;GIT2;PPP1R12A;PDCD6IP;SCRIB;ARPC5;DNM2;ENAH;MARCKS;DAB2;CTTN;ABI2;PALLD;PARD3;ZYX;ARHGEF2;ARHGEF7;FERMT2
anchoring junction (GO:0070161)	30/419	0.00016271364380084105	0.0036084143360539454	-2.059851995265626	11.585610450477311	CYFIP1;TES;ARPC1B;FHL1;DOCK7;MLLT4;CORO1B;CNN3;EPB41L5;PRKAR2A;MAPK1;CTNNA2;GIT1;GIT2;PPP1R12A;PDCD6IP;SCRIB;ARPC5;DNM2;ENAH;MARCKS;DAB2;CTTN;ABI2;PALLD;PARD3;ZYX;ARHGEF2;ARHGEF7;FERMT2
focal adhesion (GO:0005925)	25/352	0.0006303459265863993	0.011882020716153626	-1.9917641128789967	8.828950316379817	CYFIP1;TES;ARPC1B;DOCK7;FHL1;CORO1B;CNN3;EPB41L5;PRKAR2A;MAPK1;GIT1;GIT2;PPP1R12A;PDCD6IP;ARPC5;DNM2;ENAH;DAB2;MARCKS;CTTN;PALLD;ZYX;ARHGEF2;ARHGEF7;FERMT2
cell-substrate adherens junction (GO:0005924)	25/358	0.0007913716736943683	0.013561232771944404	-1.9671704617609809	8.459895431159225	CYFIP1;TES;ARPC1B;DOCK7;FHL1;CORO1B;CNN3;EPB41L5;PRKAR2A;MAPK1;GIT1;GIT2;PPP1R12A;PDCD6IP;ARPC5;DNM2;ENAH;DAB2;MARCKS;CTTN;PALLD;ZYX;ARHGEF2;ARHGEF7;FERMT2
cell-substrate junction (GO:0030055)	25/362	0.0009176480936249272	0.014414722137358232	-1.9453732127971843	8.247419898312979	CYFIP1;TES;ARPC1B;FHL1;DOCK7;CORO1B;CNN3;EPB41L5;PRKAR2A;MAPK1;GIT1;GIT2;PPP1R12A;PDCD6IP;ARPC5;DNM2;ENAH;MARCKS;DAB2;CTTN;PALLD;ZYX;ARHGEF2;ARHGEF7;FERMT2
spindle (GO:0005819)	11/93	0.0005692082209070099	0.011876976938169364	-1.8241065058022616	8.086544074744973	MZT2B;PKHD1;PARD3;FAM96B;MAPK1;CSNK1D;MMS19;E4F1;DYNLL1;MAPRE1;MZT1
proteasome regulatory particle (GO:0005838)	6/12	0.00001542740432780933	0.0004473947255064706	-0.9947073468748232	7.671251990517273	PSMD12;PSMC5;PSMD13;PSMC1;PSMD3;PSMD1
dynein complex (GO:0030286)	7/39	0.0006642739850032651	0.011925299635534807	-1.6890263402711276	7.4808549361906165	DYNC1I2;DYNC1LI1;DYNC1LI2;DYNLT1;DCTN2;DCTN1;DYNLL1
nucleoplasm (GO:0005654)	55/1051	0.0010467159893539078	0.01578447711945693	-1.7984375419529948	7.461228694923134	KDM1A;PPP2R2A;CTCF;SART1;PSMD6;PPP3CB;PSMD4;CASP3;XPO5;PSMD3;WDR5;PSMD1;KPNA4;NELFA;KPNA3;PRKACB;SKP1;KPNA1;RFC3;RFC4;PPP1R12A;DYRK1A;PPP2R5D;PSMA6;PSMA1;TBL1XR1;MCM5;SQSTM1;PSMD12;GTF3C4;RNMT;PSMD13;PDS5B;RNF2;NXF1;RBM15B;TCEB2;SYMPK;MAPK1;TCEB1;TBL1X;RBM11;CBX8;GIT2;RRM1;RPA1;SMAD9;PSMC5;RAD50;STAG2;PSMC6;STK24;PSMC1;CARM1;PSMC2
cell cortex (GO:0005938)	10/83	0.0008821876756317427	0.014414722137358232	-1.7398764278030776	7.376215204812126	C2CD5;MARCKS;DBNL;CTTN;PARD3;DVL2;ARFIP2;TRAF2;SEPT2;CLASP2
ubiquitin ligase complex (GO:0000151)	15/183	0.0021279777577959402	0.027663710851347223	-1.695996582672577	6.084614668512547	CBX8;RNF20;RNF31;CUL7;CUL3;TRAF2;BRCC3;RNF2;DCAF7;BRE;TCEB2;STUB1;TCEB1;ARIH1;SKP1
lamellipodium (GO:0030027)	11/111	0.0021246743768957026	0.027663710851347223	-1.666671005692387	5.979405237267658	ENAH;CYFIP1;DBNL;CDK5;CTTN;ABI2;DPYSL3;BRK1;CTNNA2;ARHGEF7;CORO1B
WASH complex (GO:0071203)	5/17	0.0005985744345496497	0.011876976938169364	-1.2542076944109102	5.560095184945053	SNX27;KIAA1033;KIAA0196;FAM21C;WASH1
Golgi apparatus (GO:0005794)	44/865	0.005426271299413109	0.051603613390088274	-1.6044819610377323	4.755946996894733	ARF3;GPSM1;ARF4;CUL7;HIP1;TMED10;GDI1;SAR1A;COPB1;ZC3HAV1;GOLGA2;SART1;VPS51;HERC1;TRAPPC11;MAPK1;ERC1;DNM1L;SCYL2;SCYL1;CLASP2;DBNL;COG7;DYNLT1;COG5;TRAPPC10;AP3D1;COG1;ABCA7;CSNK1D;TRAPPC9;AP3B2;MTOR;TMCO1;ARCN1;DNM2;SPATA16;VAPB;AKAP9;PFDN2;ARHGEF2;MAPRE1;ACBD3;COPE
inclusion body (GO:0016234)	7/51	0.002669483743408432	0.03246436681499932	-1.3359881097179223	4.579249139690594	NXF1;PSMC5;AGL;MVB12A;STUB1;SQSTM1;GIT1
cytoplasmic dynein complex (GO:0005868)	5/25	0.0026140979870528415	0.03246436681499932	-1.0766104031648949	3.6902029491233366	DYNC1I2;DYNC1LI1;DYNC1LI2;DYNLT1;DYNLL1
protein serine/threonine phosphatase complex (GO:0008287)	6/43	0.004951171649172724	0.04912083451942413	-1.147695017507479	3.4585468065531844	PPP3CB;PPP1R12A;WDR82;PPP2R2A;STRN;PPP2R5D
polysome (GO:0005844)	5/27	0.003502015289152469	0.04000787163668124	-1.0711012877228265	3.447531278768931	PSMA6;PSMA1;MSI1;YBX2;MSI2
phosphatase complex (GO:1903293)	6/43	0.004951171649172724	0.04912083451942413	-1.1113537911918152	3.349033538391378	PPP3CB;PPP1R12A;WDR82;PPP2R2A;STRN;PPP2R5D
kinetochore (GO:0000776)	9/98	0.008208115406555817	0.06727085887546833	-1.236580949558856	3.3375667795557153	DYNC1LI1;SEPT6;SEH1L;PPP1R12A;DCTN2;DCTN1;DYNLL1;SEPT2;CLASP2
actomyosin (GO:0042641)	7/62	0.007060147111521814	0.061899429326598226	-1.0859093223436027	3.021265042620029	ENAH;ZYX;MYO18A;CDC42BPB;SYNPO;FERMT2;CORO1B
spindle microtubule (GO:0005876)	6/44	0.005475184444571701	0.051603613390088274	-0.9966703504262372	2.9542939559993044	KIF2A;TBL1XR1;CUL3;CSNK1D;TBL1X;CLASP2
ruffle (GO:0001726)	7/68	0.011006385748016304	0.08644598806254472	-1.0393341107200291	2.5445346407981253	CYFIP1;DBNL;CDK6;CTTN;S100A6;ARFIP2;S100A11
cell-cell adherens junction (GO:0005913)	6/47	0.007290393780382953	0.06246541943646303	-0.8967537635077023	2.4868256726471705	ABI2;PARD3;ZYX;SCRIB;CTNNA2;MLLT4
ruffle membrane (GO:0032587)	6/49	0.008719540089314798	0.06994184284407828	-0.8749853895512989	2.327540933793605	ARF4;EPB41L5;C2CD5;ABCA7;ARHGEF2;CLASP2
cytoplasmic vesicle part (GO:0044433)	20/363	0.026201350741945156	0.15932111660827944	-1.187872025934175	2.1819231453279606	C2CD5;COPA;TMED10;COPB1;CLTB;SRI;DBH;COPZ1;ARCN1;DNM2;LMAN1;HSPH1;VPS51;ANXA7;COPG2;SNX9;KIF1B;COPG1;COPE;SCYL1
kinesin complex (GO:0005871)	6/53	0.012160976053231817	0.09356506065445705	-0.8651558381771498	2.049639181158082	KIF2A;KIF5C;KIF5A;KIF21A;KIF1B;KIF3C
growth cone (GO:0030426)	8/99	0.023598024068514023	0.1458435258004883	-0.8960514927024367	1.7250971267206814	FKBP15;DCTN2;CDK5;PARD3;DPYSL2;DOCK7;DPYSL3;FKBP4
protein kinase complex (GO:1902911)	7/79	0.02202978207177344	0.14207318564920296	-0.8308985812660628	1.6214262618009432	DAB2;CDK6;PRKAR2B;PRKAR2A;MMS19;ERC1;PRKACB
site of polarized growth (GO:0030427)	8/102	0.02729745740954942	0.16335145148254177	-0.8845698845205314	1.602709055627911	FKBP15;DCTN2;CDK5;PARD3;DPYSL2;DOCK7;DPYSL3;FKBP4
serine/threonine protein kinase complex (GO:1902554)	6/56	0.015300416074624314	0.11092801654102627	-0.7036278260674084	1.5471887830127642	DAB2;PRKAR2B;PRKAR2A;MMS19;ERC1;PRKACB
cytosolic part (GO:0044445)	12/198	0.042580514881002396	0.2140380548018387	-0.8105499048002847	1.2495449114495187	HBZ;VAC14;PSMC5;FAM96B;MMS19;ERC1;ENO2;UBQLN4;UACA;PIK3R6;MTOR;CIAO1
nuclear envelope (GO:0005635)	8/110	0.03908263994520894	0.20748083548940668	-0.7790440355631671	1.2252152552233022	RANBP1;RRM1;SEH1L;S100A6;ANXA7;LBR;EMD;UACA
nuclear ubiquitin ligase complex (GO:0000152)	5/38	0.012503111228380636	0.09427345866199	-0.48591729311991155	1.1475206975872303	CBX8;CUL7;BRE;BRCC3;RNF2
transcription elongation factor complex (GO:0008023)	5/43	0.019497431229203124	0.12895669427034348	-0.41043933726655574	0.8406941252043095	CTR9;TCEB2;TCEB1;WDR61;NELFA
postsynaptic density (GO:0014069)	7/98	0.055681091602766845	0.25291291005112165	-0.4394034087581699	0.6040522945743477	NSF;DBNL;CDK5;STRN;HOMER3;PDLIM5;CPEB4
organelle envelope (GO:0031967)	8/123	0.06470225804524572	0.27325625048191826	-0.42243528143382914	0.5480444174582734	RANBP1;RRM1;SEH1L;S100A6;ANXA7;LBR;EMD;UACA
actin cytoskeleton (GO:0015629)	11/193	0.0706989349086888	0.283547855963571	-0.4215410541814278	0.5312995388882705	MARCKS;STAG2;PPP1R12A;ARPC1B;RPA1;ARPC5;CTNNA2;SYNPO;PDLIM5;SEPT2;CORO1B
envelope (GO:0031975)	8/123	0.06470225804524572	0.27325625048191826	-0.4016094151303595	0.5210260781576136	RANBP1;RRM1;SEH1L;S100A6;ANXA7;LBR;EMD;UACA
coated vesicle (GO:0030135)	6/75	0.0485657535936234	0.22604060623204966	-0.27845690359313857	0.4140767271906415	DAB2;TMED10;HIP1;DVL2;SNX9;AP3B2
neuronal cell body (GO:0043025)	14/270	0.08191393850239234	0.2993738556454126	-0.3349058828332153	0.4039173035055696	RRM1;UBXN1;MYO10;CRMP1;CDK5;DPYSL5;MAP2;DPYSL2;PARD3;STRN;ARHGEF2;FKBP4;ARHGEF7;VPS16
methyltransferase complex (GO:0034708)	6/81	0.06446147200717514	0.27325625048191826	-0.29491168555832636	0.38260228256708145	METTL14;LAS1L;WDR82;WDR5;SENP3;RNF2
stress fiber (GO:0001725)	5/53	0.04017533419290899	0.20748083548940668	-0.09188546971086259	0.14450977619220762	ENAH;ZYX;SYNPO;CORO1B;FERMT2
actin filament bundle (GO:0032432)	5/55	0.04546175054854232	0.22551420995790072	-0.0697041450075636	0.1038154092949692	ENAH;ZYX;SYNPO;FERMT2;CORO1B
dendrite (GO:0030425)	12/236	0.11249371011635745	0.36247973259715177	-0.03356849516574751	0.03406486298129631	FARP1;DBNL;UBXN1;ABI2;CDK5;DPYSL5;DPYSL2;SACS;CRMP1;PRSS12;KPNA1;CPEB4
histone acetyltransferase complex (GO:0000123)	1/78	0.927613367419655	1	6.462903151742294	0	WDR5
secretory granule (GO:0030141)	3/176	0.9345855120305948	1	4.794679283391107	0	STXBP1;VPS33B;KIT
lysosome (GO:0005764)	5/261	0.9377411390989271	1	4.548722104643263	0	USP5;KIT;VPS33B;SQSTM1;MTOR
lytic vacuole (GO:0000323)	5/261	0.9377411390989271	1	4.56627442745079	0	USP5;KIT;VPS33B;SQSTM1;MTOR
synaptic vesicle (GO:0008021)	1/86	0.9445622657046211	1	6.051588830211089	0	SEPT6
acetyltransferase complex (GO:1902493)	1/86	0.9445622657046211	1	6.28925159977358	0	WDR5
protein acetyltransferase complex (GO:0031248)	1/86	0.9445622657046211	1	6.313436936309296	0	WDR5
oxidoreductase complex (GO:1990204)	1/88	0.9481401309460457	1	6.013823407630617	0	PARK7
endocytic vesicle membrane (GO:0030666)	1/94	0.9575494589647002	1	5.791155406955025	0	DNM2
cation channel complex (GO:0034703)	2/147	0.9576053322606551	1	5.060064375329754	0	AKAP9;PDE4B
vacuole (GO:0005773)	5/293	0.9682687934742185	1	4.624557946403736	0	USP5;KIT;VPS33B;SQSTM1;MTOR
sperm part (GO:0097223)	1/103	0.968566863536018	1	5.651724202791561	0	KIT
side of membrane (GO:0098552)	3/235	0.9852016402655844	1	4.7371408744780625	0	RNF31;KIT;TRAF2
extracellular matrix part (GO:0044420)	1/127	0.9859081108073161	1	5.148968672718725	0	PRSS12
proteinaceous extracellular matrix (GO:0005578)	3/239	0.9866767815087948	1	4.630006769493326	0	LGALS3BP;VTN;EMILIN1
cilium (GO:0005929)	3/243	0.9880103893562565	1	4.795000000232073	0	PKHD1;STRC;PDE4C
ribosomal subunit (GO:0044391)	1/135	0.9892182242712902	1	5.118306386313173	0	MRPL15
intermediate filament (GO:0005882)	2/196	0.9895354550138356	1	4.971913058549367	0	INA;NES
membrane raft (GO:0045121)	2/200	0.990689405645729	1	5.0111043578239345	0	MAPK1;TRAF2
intracellular (GO:0005622)	14/730	0.9927076617989946	1	4.702284502771037	0	ARF3;ARF4;DBNL;SAR1A;SMAD9;ABCA7;EDF1;PRKRA;PITPNM3;ZNF845;DCX;FSD1;TELO2;TRIM56
anchored component of membrane (GO:0031225)	1/150	0.9934765255663669	1	5.23229433409775	0	PKHD1
transmembrane transporter complex (GO:1902495)	3/286	0.9962413207238089	1	4.921682757918301	0	AKAP9;PDE4B;ABCA7
transporter complex (GO:1990351)	3/291	0.9967248096935861	1	4.91715263066431	0	AKAP9;PDE4B;ABCA7
extracellular matrix (GO:0031012)	4/348	0.9971775063522377	1	4.761993536869818	0	LGALS3BP;VTN;NDNF;EMILIN1
ion channel complex (GO:0034702)	2/258	0.9983458095998865	1	4.982600821108667	0	AKAP9;PDE4B
external side of plasma membrane (GO:0009897)	1/191	0.9983526829093378	1	5.182704489720264	0	KIT
cell surface (GO:0009986)	5/437	0.9989725721435473	1	4.910935596308134	0	GPR98;ABCA7;SLC3A2;MIF;SEPT2
extracellular space (GO:0005615)	19/1120	0.9997939210988419	1	4.798926987626027	0	LGALS3BP;GPI;SERPINB12;COPA;PDE4C;MIF;ENO2;GNL1;SOGA1;IGHG3;VTN;VGF;RNPEP;KIT;DPYSL3;INA;S100A9;S100A8;S100A11
extracellular region (GO:0005576)	16/1585	0.9999999999084153	1	4.940995223103562	0	LRSAM1;NDNF;DBH;MIF;UACA;PRSS12;IGHG3;VTN;TXLNA;HSPH1;OBP2A;RNPEP;EMILIN1;THEM6;S100A9;S100A8
integral component of plasma membrane (GO:0005887)	2/1066	1.0000000001195728	1	4.956123118441404	0	ZYX;KTN1
cell body (GO:0044297)	15/315	0.12252103080588574	0.3881548623009994	0.00043440733389988803	-0.0004111017667755221	RRM1;UBXN1;MYO10;CRMP1;CDK5;MAP2;DPYSL5;PARD3;DPYSL2;DPYSL3;STRN;ARHGEF2;FKBP4;ARHGEF7;VPS16
mitochondrial membrane (GO:0031966)	11/457	0.9012748122685054	0.9980195517244177	4.146446444065567	-0.00821996500704825	ABCD3;COX4I1;CKMT1A;DNAJC11;IMMT;SUCLG1;ATP5H;DNM1L;NIPSNAP1;MTOR;ATP5L
receptor complex (GO:0043235)	6/272	0.8943845710252175	0.9980195517244177	4.1988590857306844	-0.008323868454548659	RNF31;DAB2;RNMT;GPR98;TRAF2;LRP1B
apical plasma membrane (GO:0016324)	4/201	0.9055617224191816	0.9980195517244177	4.4510472865608754	-0.008823809359122862	PKHD1;DAB2;MYO1A;ABCA7
plasma membrane region (GO:0098590)	9/395	0.9145996239255413	0.9980195517244177	4.452524822488955	-0.008826738444012612	PKHD1;DAB2;MYO1A;CLTB;MAPK1;ABCA7;SCRIB;CTNNA2;SEPT2
mitochondrial matrix (GO:0005759)	4/208	0.9186015502609363	0.9980195517244177	4.566224688794329	-0.009052138418410897	QARS;IDH3G;ABAT;SUCLG1
mitochondrial outer membrane (GO:0005741)	2/118	0.9064466607506122	0.9980195517244177	4.956528916480615	-0.009825882185987107	DNM1L;MTOR
large ribosomal subunit (GO:0015934)	1/74	0.9172898426459155	0.9980195517244177	6.249166845282767	-0.012388423071265931	MRPL15
voltage-gated potassium channel complex (GO:0008076)	1/70	0.9054977788698436	0.9980195517244177	6.296427776711675	-0.012482113706798468	AKAP9
potassium channel complex (GO:0034705)	1/71	0.9085943911955315	0.9980195517244177	6.309107050437799	-0.012507249250630872	AKAP9
vacuolar lumen (GO:0005775)	1/70	0.9054977788698436	0.9980195517244177	6.3287378427549905	-0.012546165568032943	TXNDC5
coated vesicle membrane (GO:0030662)	1/66	0.8920288092345265	0.9980195517244177	6.35560667999061	-0.01259943067222185	LMAN1
microbody part (GO:0044438)	1/71	0.9085943911955315	0.9980195517244177	6.368832483230479	-0.012625649662696794	ABCD3
centriole (GO:0005814)	1/72	0.9115897550120811	0.9980195517244177	6.408028142739252	-0.012703351606743706	CCP110
peroxisomal part (GO:0044439)	1/71	0.9085943911955315	0.9980195517244177	6.41798278022642	-0.012723085799119318	ABCD3
lysosomal lumen (GO:0043202)	1/67	0.895565728134001	0.9980195517244177	6.421520176950647	-0.012730098376679752	TXNDC5
nonmotile primary cilium (GO:0031513)	1/67	0.895565728134001	0.9980195517244177	6.462705721668385	-0.012811745092956664	STRC
secretory granule lumen (GO:0034774)	1/62	0.8766450781530657	0.9980195517244177	6.726726510278138	-0.013335143061019539	DBH
axon (GO:0030424)	9/161	0.10433572149163742	0.3462926819753497	0.02191513254780376	-0.023240361647874797	FKBP15;CDK5;DPYSL2;DOCK7;SACS;PARK7;CTNNA2;PRSS12;VPS16
cytoplasmic ribonucleoprotein granule (GO:0036464)	7/111	0.09096373750301572	0.31175753671488116	0.0676793356872843	-0.07888226358373954	PSMA6;TIA1;PSMC2;LARP4B;INA;SQSTM1;PUM2
endoplasmic reticulum membrane (GO:0005789)	12/449	0.8259498909234805	0.9730722152442255	3.7552110976450934	-0.10250592368765639	LMAN1;SGPL1;VAPB;TECR;STT3A;ANXA7;MOGS;SRI;FKBP4;UBQLN4;KTN1;CHERP
ribonucleoprotein granule (GO:0035770)	7/111	0.09096373750301572	0.31175753671488116	0.08884650382247848	-0.10355322288329169	PSMA6;TIA1;PSMC2;LARP4B;INA;SQSTM1;PUM2
integral component of organelle membrane (GO:0031301)	5/211	0.8373612958534803	0.9741190384626979	4.038706598905181	-0.10590202231359122	SGPL1;TECR;LEMD2;LBR;KTN1
endosome membrane (GO:0010008)	4/175	0.8397577917781878	0.9741190384626979	4.332268476089148	-0.11359973337692615	VAC14;AP3D1;VPS37B;VPS28
basolateral plasma membrane (GO:0016323)	3/138	0.842932742488263	0.974802588705752	4.458674653769831	-0.11378672193189483	MYO1A;SCRIB;CTNNA2
outer membrane (GO:0019867)	3/137	0.8394521298016718	0.9741190384626979	4.415471639517997	-0.11578146731927096	DNM1L;EMD;MTOR
endocytic vesicle (GO:0030139)	2/96	0.8338349311116758	0.9741190384626979	5.026215108531051	-0.13179624009351354	DVL2;VPS11
caveola (GO:0005901)	1/58	0.8590750788911032	0.981428196187715	7.05021626461094	-0.13216635158476153	MAPK1
plasma membrane raft (GO:0044853)	1/58	0.8590750788911032	0.981428196187715	7.086800342659405	-0.13285217226604026	MAPK1
calcium channel complex (GO:0034704)	1/57	0.8543055755721418	0.981428196187715	7.086901801227557	-0.13285407425149523	PDE4B
nuclear chromosome (GO:0000228)	1/57	0.8543055755721418	0.981428196187715	7.214064670606297	-0.13523792346576682	FIGNL1
mitochondrial inner membrane (GO:0005743)	9/341	0.810248533470524	0.9638108044179536	3.8180256269273194	-0.14073343489830203	ABCD3;COX4I1;CKMT1A;DNAJC11;IMMT;SUCLG1;ATP5H;NIPSNAP1;ATP5L
MLL1/2 complex (GO:0044665)	4/27	0.017467516980568917	0.1175938196727586	0.06722292069156444	-0.14389192544392604	LAS1L;WDR5;SENP3;RNF2
endosomal part (GO:0044440)	5/200	0.8027284241888997	0.9637854010166088	3.962435292226193	-0.1461608536434982	VAC14;MVB12A;AP3D1;VPS37B;VPS28
clathrin-coated vesicle (GO:0030136)	5/57	0.0511437652516323	0.23513657926665094	0.10501407759180811	-0.1520171968193114	DAB2;HIP1;TMED10;DVL2;SNX9
organelle outer membrane (GO:0031968)	3/131	0.8171454287421123	0.9657173248770418	4.363697949674658	-0.1522237277634922	DNM1L;EMD;MTOR
ribosome (GO:0005840)	4/166	0.8093835559466525	0.9638108044179536	4.13076882281086	-0.1522612318537102	MRPL40;RPL36AL;SRP68;LARP4B
mitochondrial membrane part (GO:0044455)	4/167	0.8129756917902102	0.9638108044179536	4.202807332266412	-0.15491659037438957	TOMM70A;PARK7;ATP5H;ATP5L
blood microparticle (GO:0072562)	4/161	0.790574503545101	0.9597176274538363	4.215492727307891	-0.17332494029678486	IGHG3;LGALS3BP;VTN;PSMC5
organelle inner membrane (GO:0019866)	10/360	0.7708664195494628	0.9523060865300252	3.5702104276923783	-0.17447181510172294	ABCD3;COX4I1;CKMT1A;DNAJC11;IMMT;SUCLG1;ATP5H;EMD;NIPSNAP1;ATP5L
cytoplasmic membrane-bounded vesicle (GO:0016023)	14/492	0.7729593169182698	0.9523060865300252	3.6574551581545296	-0.1787353583269974	TMED10;HIP1;STXBP1;COPB1;VPS33B;FNBP1L;AP3B2;DAB2;SEPT6;DPYSL3;KIT;DVL2;VPS11;SNX9
nuclear chromosome part (GO:0044454)	9/327	0.7714831806786167	0.9523060865300252	3.6850054445055807	-0.1800817071105191	CBX8;RAD50;LDB1;KDM1A;DPF2;RPA1;PLRG1;BCAS2;RNF2
chromatin (GO:0000785)	13/289	0.18837000584977465	0.5221727368041547	0.2791191597333896	-0.18135958109647515	CBX8;TTC37;LDB1;KDM1A;MAGED1;CTR9;WDR61;PARK7;PDS5B;RNF2;STAG2;WDR82;DPF2
gamma-tubulin complex (GO:0000930)	4/15	0.0029250472457324683	0.034460712863785645	0.054888714927713064	-0.18486164394648183	MZT2B;UXT;CKAP5;MZT1
acrosomal vesicle (GO:0001669)	1/53	0.8335619293307099	0.9741190384626979	7.128774983688039	-0.18692907466854738	KIT
collagen trimer (GO:0005581)	2/91	0.811413611860759	0.9638108044179536	5.0753514889042455	-0.18707879887242646	EMILIN1;WDR33
mitochondrion (GO:0005739)	39/1269	0.747348648823523	0.9456591671472147	3.414287991364808	-0.1907667289895424	SHC1;COX4I1;STXBP1;HEATR1;RAP1GDS1;ABAT;PARK7;MRPL15;ATP5H;ADO;SPATA5;UACA;ADH5;ATP5L;MRPL40;DPYSL2;SACS;MAPK1;KIF1B;DNM1L;LBR;GLUL;IDH3G;CKMT1A;IMMT;CTPS2;DYNLL1;NIPSNAP1;NT5C3A;SCCPDH;TOMM70A;MSRB3;PFDN2;SUCLG1;SSBP1;FKBP4;ACBD3;PFDN4;ABCE1
synapse part (GO:0044456)	17/395	0.19038100654283768	0.5238951785886847	0.2987976002284425	-0.19316178890823424	NSF;DBNL;AP3D1;SCRIB;PRSS12;GPHN;NIPSNAP1;DNM2;SEPT6;CDK5;STRN;HOMER3;ERC1;SYNPO;PDLIM5;CPEB4;PFN2
Z disc (GO:0030018)	2/87	0.7915744448640946	0.9597176274538363	4.894185197443612	-0.20123017925120604	PDE4B;SRI
nuclear chromatin (GO:0000790)	5/177	0.7119874263032074	0.9385288801269553	3.548332427508203	-0.22511206673309217	CBX8;LDB1;KDM1A;DPF2;RNF2
nuclear body (GO:0016604)	10/210	0.18244594251490576	0.5094971876156998	0.3365787919868866	-0.22696549527987547	NXF1;SART1;DYRK1A;RPA1;PPIH;PARK7;SQSTM1;RNF2;MTOR;RBM11
extrinsic component of cytoplasmic side of plasma membrane (GO:0031234)	4/26	0.01560521817099	0.11100315566911755	0.11127836941827492	-0.2446117387194176	FARP1;S100A6;SNX9;FERMT2
MLL1 complex (GO:0071339)	4/27	0.017467516980568917	0.1175938196727586	0.11999336332179533	-0.25684804990974397	LAS1L;WDR5;SENP3;RNF2
transcription factor complex (GO:0005667)	8/268	0.682007355182126	0.9182741889416483	3.086155640242294	-0.26312332203994465	GTF3C4;LDB1;KDM1A;CTBP1;SMAD9;MMS19;EDF1;PBX1
cytoplasmic membrane-bounded vesicle lumen (GO:0060205)	2/76	0.7273072028123381	0.9454993636560395	4.7910176244138825	-0.268498515889872	HSPH1;DBH
vesicle lumen (GO:0031983)	2/76	0.7273072028123381	0.9454993636560395	4.814726821026842	-0.2698272282016535	HSPH1;DBH
catalytic step 2 spliceosome (GO:0071013)	2/80	0.7524157217924656	0.9456591671472147	4.888343615726443	-0.273126732164231	SART1;PLRG1
synapse (GO:0045202)	11/243	0.208016798636998	0.5507738580081353	0.468720902803759	-0.2795596651150239	ENAH;FARP1;CYFIP1;CTBP2;CDK5;MAP1B;SAMD4A;ERC1;DNM1L;SEPT2;GPHN
chromosomal region (GO:0098687)	7/124	0.1362917142882386	0.4143707765053706	0.3462879046238102	-0.30507760452464594	RAD50;STAG2;DHX36;CTCF;PDS5B;TELO2;CENPB
spindle pole (GO:0000922)	5/63	0.07056970612529792	0.283547855963571	0.24318607861597535	-0.3065054996448953	DYNC1LI1;KIF2A;DCTN1;WDR62;CKAP5
Golgi membrane (GO:0000139)	13/308	0.24972122087183907	0.6120287059274934	0.6411273476968881	-0.3147781999411657	ARF3;VAC14;TRAPPC3;TMED10;CUL3;COPB1;COG2;SCAMP3;DNM2;GOLGA2;LMAN1;MYO18A;COPG1
lateral plasma membrane (GO:0016328)	1/46	0.7899231400811244	0.9597176274538363	7.847687345510804	-0.32266689296298434	MYO1A
mitochondrial respiratory chain complex I (GO:0005747)	1/47	0.7967947410956253	0.9597176274538363	7.873166822330657	-0.323714511612635	PARK7
neuromuscular junction (GO:0031594)	1/47	0.7967947410956253	0.9597176274538363	7.911988572768224	-0.32531071353067387	CDK5
respiratory chain complex I (GO:0045271)	1/47	0.7967947410956253	0.9597176274538363	7.922284943601731	-0.32573406092454565	PARK7
NADH dehydrogenase complex (GO:0030964)	1/47	0.7967947410956253	0.9597176274538363	7.949805969381521	-0.32686562026025223	PARK7
synaptic membrane (GO:0097060)	10/228	0.25000642098894954	0.6120287059274934	0.6796598369727248	-0.33369673095855507	CDK5;STRN;HOMER3;SCRIB;ERC1;SYNPO;PDLIM5;GPHN;NIPSNAP1;DNM2
axon part (GO:0033267)	7/133	0.17305119369261132	0.4942446971372308	0.47824060929063045	-0.33702789630858027	SEPT6;PARD3;AP3D1;FKBP4;GLUL;PRSS12;PFN2
cell projection membrane (GO:0031253)	9/196	0.226545727703415	0.5770793198931584	0.6159346755892625	-0.33862582653691903	ARF4;EPB41L5;C2CD5;CLTB;ABCA7;ARHGEF2;MAPRE1;SEPT2;CLASP2
leading edge membrane (GO:0031256)	6/95	0.11202289213077057	0.36247973259715177	0.3465917933713575	-0.351716747901295	ARF4;EPB41L5;C2CD5;ABCA7;ARHGEF2;CLASP2
contractile fiber part (GO:0044449)	5/167	0.6644355833575928	0.9010511328266636	3.378550743722218	-0.3520222558939898	PSMA6;LMAN1;TMOD3;PDE4B;SRI
[truncated: 217 more rows]

## Sheet: (B) CORUM
Term	Overlap	P-value	Adjusted P-value	Z-score	Combined Score	Genes
[truncated: 311 more rows]

## Sheet: (B) REACTOME 
Term	Overlap	P-value	Adjusted P-value	Z-score	Combined Score	Genes
[truncated: 847 more rows]

[truncated: 3 more sheets: (B) Mamm Phenotype 4, (C) Central Nerve Dis, (C) Psychiatric]
